# Supplementary material for: A telomere-to-telomere genome of raintree (Samanea Saman) reveals its ecological adaptation characteristics of nyctinastic movement and symbiotic nitrogen fixation
Source: Research Square preprint supplement (doi:10.21203/rs.3.rs-7165529/v1), 2025-08-13
Supplement: Supplementary file 1 [file 255956faba581b830a1a2f07.xlsx]

## Sheet: Full genes with annotation
	T0			SUM T0	T1			SUM T1	T2			SUMT2	T3			SUM	T4 dark			SUM				T0				T1				T2			T3				T4 dark			SUM
Gene id	Pulvinus 1	Pulvinus 2	Pulvinus 3	Pulvinus T0 average	Pulvinus 1	Pulvinus 2	Pulvinus 3	Pulvinus T1 average	Pulvinus 1	Pulvinus 2	Pulvinus 3	Pulvinus T2 average	Pulvinus 1	Pulvinus 2	Pulvinus 3	Pulvinus T3 average	Pulvinus 1	Pulvinus 2	Pulvinus 3	Pulvinus T4 average	Pulvinus（T1/T0）	Pulvinus（T2/T0)	Pulvinus（T4/T3）	Leaflet 1	Leaflet 2	Leaflet 3	Leaflet T0 average	Leaflet 1	Leaflet 2	Leaflet 3	Leaflet T1 average	Leaflet 1	Leaflet 2	Leaflet 3	Leaflet 1	Leaflet 2	Leaflet 3	Leaflet T3 average	Leaflet 1	Leaflet 2	Leaflet 3	Leaflet T4 average	Leaflet（T1/T0）	Leaflet（T4/T3）	Root1	Root 2	Root 3	Descrption
Ssa08023187	0.174	0.066	0.25	0.163333	81.137	177.86	72.191	110.396	2.136	28.332	9.265	13.2443	0.463	0.563	0.312	0.446	587.709	305.511	74.975	322.732	675.894	81.0878	723.614	0.263	0.05	0.183	0.165333	0.139	0.148	0.219	0.168667	0.185	0.84	0.132	0.363	0.058	0.389	0.27	0.724	0.314	0.541	0.526333	1.02016	1.94938	3.327	4.862	4.659	Ssa02010591,sodium ion transport,CitMHS
Ssa09025187	1.555	2.714	9.835	4.70133	1408.07	1638.86	514.823	1187.25	72.46	686.419	519.504	426.128	148.339	43.988	47.974	80.1003	416.33	161.717	37.755	205.267	252.535	90.6397	2.56263	0.128	0	0	0.0426667	0	6.117	0	2.039	18.42	53.968	25.366	3.234	3.117	1.733	2.69467	2.201	0.917	2.237	1.785	47.7891	0.66242	53.23	122.273	145.311	Ssa09024980,RING finger and transmembrane domain-containing protein,zf-C3HC4_3
Ssa12006819	0	0	0.126	0.042	1.399	9.6	19.462	10.1537	3.271	0.156	0	1.14233	0	0.253	1.894	0.715667	0	0	0	0	241.754	27.1984	0	0	0	0	0	0	0	0	0	0	0	0	0	0	0	0	0	0	0	0	#DIV/0!	#DIV/0!	1.373	1.39	1.852	Ssa10004469,Protein kinase superfamily protein,-
Ssa10004166	0.223	0.042	0.414	0.226333	44.164	79.15	15.234	46.1827	0.474	17.289	7.361	8.37467	0.676	0.719	0.464	0.619667	35.964	35.507	17.524	29.665	204.047	37.0015	47.8725	0.538	1.465	1.168	1.057	0.844	0.661	0.653	0.719333	2.044	6.28	0.801	1.775	0.632	2.15	1.519	1.31	0.722	1.14	1.05733	0.680542	0.696072	0	0	0	Ssa06018873,Pentatricopeptide repeat-containing protein,"PPR,PPR_3"
Ssa09024932	0.356	0.268	0.306	0.31	24.142	53.086	32.402	36.5433	0	1.645	2.317	1.32067	0.135	0.164	0.318	0.205667	27.627	21.672	10.567	19.9553	117.882	4.26022	97.0276	0.752	0.407	0.125	0.428	0	0	0.448	0.149333	0.126	0.612	0	0.494	0.238	0.132	0.288	0.37	0.257	0	0.209	0.34891	0.725694	46.747	27.842	10.048	Ssa06018737,PQQ enzyme repeat,"PQQ,PQQ_2,PQQ_3"
Ssa03013391	0	0	0.069	0.023	1.323	2.214	4.042	2.52633	0.512	3.588	2.816	2.30533	0	5.209	7.371	4.19333	0	0	0	0	109.841	100.232	0	0	0	0	0	6.238	1.734	2.519	3.497	9.423	6.449	0	0	0	3.125	1.04167	0	0	0	0	#DIV/0!	0	10.617	10.365	3.265	Ssa07020769,Belongs to the protein kinase superfamily. Ser Thr protein kinase family,"LRRNT_2,LRR_8,Pkinase,Pkinase_Tyr"
Ssa05016804	0.258	0.327	1.355	0.646667	48.513	58.505	103.62	70.2127	160.602	62.104	86.814	103.173	178.133	97.984	136.876	137.664	42.497	52.982	45.075	46.8513	108.576	159.546	0.34033	0.933	0.884	2.366	1.39433	66.373	69.887	376.487	170.916	168.232	95.302	606.45	488.279	353.569	87.837	309.895	48.372	25.269	59.566	44.4023	122.579	0.143282	0	0	0.077	Ssa11005435,Mediates both low-affinity uptake and efflux of sugar across the membrane,MtN3_slv
Ssa07019812	2.649	1.336	7.232	3.739	289.934	359.992	493.368	381.098	1015.01	343.769	451.095	603.292	1176.21	513.776	797.301	829.095	339.754	555.052	434.029	442.945	101.925	161.351	0.534251	3.769	7.953	6.056	5.926	1258.69	1183.18	3913.66	2118.51	2142.12	1643.2	4026.23	2388.4	2907.84	1047.58	2114.61	1651.27	894.67	1348.3	1298.08	357.494	0.613864	41.372	29.941	36.328	Ssa07021219,-,-
Ssa07020019	0	0	3.669	1.223	0.135	14.886	336.068	117.03	756.733	5.961	14.495	259.063	0.265	1.289	7.629	3.061	1.697	0.362	0.088	0.715667	95.6907	211.826	0.233802	21.167	6.396	0.082	9.215	0	0	0	0	0.329	3.366	0.441	0.404	0	0.26	0.221333	0	0.504	0.145	0.216333	0	0.97741	0.455	0.104	0.296	Ssa06017883,RING-H2 finger protein,zf-RING_2
Ssa09025109	0	0	0.04	0.0133333	0	0	3.701	1.23367	0.149	0	0.037	0.062	0	0.194	0.209	0.134333	0.178	0	0	0.0593333	92.525	4.65	0.441687	0	0	0	0	0	0	0	0	0	0	0	0	0	0	0	0	0	0	0	#DIV/0!	#DIV/0!	4.32	45.956	37.556	Ssa01002724,R3H domain-containing protein,"R3H,SUZ"
Ssa12007199	0.418	1.206	1.635	1.08633	68.644	80.571	122.283	90.4993	500.625	172.573	183.555	285.584	174.788	96.179	142.794	137.92	46.399	44.201	62.415	51.005	83.3071	262.888	0.369815	0.925	1.912	3.362	2.06633	2375.2	2721.2	2890.22	2662.21	1357.93	1006.53	4061.19	1082.82	997.569	1937.22	1339.2	766.04	705.41	895.596	789.015	1288.37	0.589168	6.825	8.383	10.005	Ssa03012568,GTP-BINDING protein,"GTP-bdg_M,GTP-bdg_N,MMR_HSR1"
Ssa02011228	0	0	0.265	0.0883333	0.848	2.306	18.59	7.248	3.854	0.055	4.01	2.63967	0	4.297	3.027	2.44133	0	0.144	0	0.048	82.0528	29.883	0.0196614	0	0	0	0	0	0	0	0	0	0.106	0.058	0.107	0	0.057	0.0546667	0.107	0.555	0.717	0.459667	#DIV/0!	8.40854	3.89	7.255	4.234	Ssa08022740,leucine-rich repeat extensin-like protein,"LRRNT_2,LRR_1,LRR_6,LRR_8"
Ssa08022382	0	0	0.265	0.0883333	0.893	2.306	18.234	7.14433	3.854	0.055	4.01	2.63967	0	4.332	2.981	2.43767	0	0.144	0	0.048	80.8792	29.883	0.019691	0	0	0	0	0	0	0	0	0	0.106	0.058	0.107	0	0.057	0.0546667	0.107	0.61	0.765	0.494	#DIV/0!	9.03659	3.742	6.201	13.377	Ssa05016558,GDSL esterase lipase,Lipase_GDSL
Ssa09025810	0	0	0.116	0.0386667	0.235	0.35	8.698	3.09433	3.24	1.009	1.373	1.874	0	0.655	0.121	0.258667	0.771	0	0	0.257	80.0259	48.4655	0.993557	0	0	0	0	0	0	0	0	0	0.14	0	0	0	0	0	0	0	0	0	#DIV/0!	#DIV/0!	1.174	0.703	1.23	Ssa05016078,DnaJ homolog subfamily B member,"DnaJ,DnaJ_C"
Ssa06019076	0	0	0.069	0.023	0.701	2.019	2.712	1.81067	54.089	133.603	52.399	80.0303	0.643	2.51	0.72	1.291	0.383	0.376	0	0.253	78.7246	3479.58	0.195972	0	0	0	0	0.386	0.308	0	0.231333	53.228	10.652	1.282	0.587	0	45.198	15.2617	0.251	0.087	0.075	0.137667	#DIV/0!	0.00902042	42.101	113.66	77.118	Ssa07021127,Polyadenylate-binding protein-interacting protein,"DUF1771,PAM2,PPR,PPR_2,Smr"
Ssa08021927	0.166	0.187	0.142	0.165	12.519	15.723	9.497	12.5797	0	1.765	3.62	1.795	0	0.114	0	0.038	33.342	17.427	8.581	19.7833	76.2404	10.8788	520.614	0	0	0	0	0	0	0	0	0	1.196	0	0	0	0	0	0.344	0	0	0.114667	#DIV/0!	#DIV/0!	11.144	7.113	15.956	Ssa07021692,Belongs to the iron ascorbate-dependent oxidoreductase family,"2OG-FeII_Oxy,DIOX_N"
Ssa02011693	0.166	0.187	0.142	0.165	12.663	15.58	9.333	12.5253	0	1.765	3.62	1.795	0	0.114	0	0.038	32.713	17.118	8.395	19.4087	75.9111	10.8788	510.754	0	0	0	0	0	0	0	0	0	1.196	0	0	0	0	0	0.344	0	0	0.114667	#DIV/0!	#DIV/0!	3.721	3.842	4.348	Ssa12006924,Beta-amylase,Glyco_hydro_14
Ssa12007771	0.929	0.946	0.407	0.760667	55.568	64.817	52.424	57.603	43.291	160.458	152.08	118.61	86.018	197.627	324.986	202.877	34.422	41.675	35.291	37.1293	75.727	155.929	0.183014	0.626	1.328	1.127	1.027	83.161	56.359	53.31	64.2767	172.305	175.768	80.004	113.625	125.204	63.15	100.66	59.043	44.826	55.71	53.193	62.5868	0.528444	0	0	0	Ssa04015558,sugar transporter,MtN3_slv
Ssa13009362	1.418	1.805	0.754	1.32567	84.868	105.094	109.793	99.9183	233.787	205.689	176.742	205.406	67.061	88.071	75.196	76.776	15.93	14.551	6.544	12.3417	75.3721	154.945	0.160749	0.591	0.927	1.016	0.844667	252.576	238.338	205.817	232.244	637.691	371.52	97.311	95.385	58.131	96.067	83.1943	8.107	7.395	9.218	8.24	274.953	0.0990452	1.539	1.549	1.463	Ssa08023307,-,-
Ssa01001227	0.123	0	1.589	0.570667	5.254	100.856	17.69	41.2667	280.082	118.472	193.415	197.323	15.583	6.141	4.516	8.74667	80.271	24.705	0.695	35.2237	72.3131	345.776	4.0271	0	0	0	0	0	1.099	0	0.366333	0.653	13.618	0.981	4.232	0.618	0.137	1.66233	1.408	2	0.574	1.32733	#DIV/0!	0.798476	3.071	6.663	4.59	Ssa04015078,Complex I intermediate-associated protein 30 (CIA30),"CIA30,NAD_binding_10"
Ssa06018909	3.157	2.053	18.696	7.96867	523.942	482.519	545.507	517.323	2679.72	820.575	1117.98	1539.42	5028.49	1979.24	2201.77	3069.84	1267.76	1416.14	1381.9	1355.27	64.9196	193.185	0.441478	33.007	59.632	80.826	57.8217	4330.27	5280.74	15709.1	8440.05	6925.21	6269.38	36701.9	14656.1	14823.3	23221.8	17567.1	5568.84	3828.53	6314.3	5237.22	145.967	0.298127	4	3.596	2.999	Ssa09024545,WLM domain,"WLM,zf-RanBP"
Ssa03012415	0	0	0.377	0.125667	5.977	3.284	14.904	8.055	1.635	0.936	1.485	1.352	0	0	0	0	64.767	18.944	16.816	33.509	64.0981	10.7586	#DIV/0!	0	0	0	0	0	0	0	0	0	1.057	0	0	0	0	0	0.152	0.158	0.136	0.148667	#DIV/0!	#DIV/0!	14.889	18.594	17.922	Ssa01000882,UDP-N-acetylglucosamine--dolichyl-phosphate N-acetylglucosaminephosphotransferase-like,Glycos_transf_4
Ssa12006755	0.202	0	0	0.0673333	3.86	6.041	1.531	3.81067	4.62	3.371	1.419	3.13667	0.919	0.884	1.202	1.00167	0.384	0.564	0.227	0.391667	56.5941	46.5842	0.391015	0.061	0	0	0.0203333	0.161	0.086	0	0.0823333	0.071	0.694	0.153	0.7	0	1.199	0.633	0.07	0.291	0	0.120333	4.04918	0.1901	0	0	0	Ssa01002025,Belongs to the MIP aquaporin (TC 1.A.8) family,MIP
Ssa03013389	0	0	0.138	0.046	1.115	2.629	3.329	2.35767	0.384	4.015	2.566	2.32167	0	5.043	7.014	4.019	0	0	0	0	51.2536	50.471	0	0	0	0	0	5.854	1.632	2.418	3.30133	9.084	6.284	0	0	0	3.393	1.131	0	0	0	0	#DIV/0!	0	56.215	34.139	40.23	Ssa07021726,alpha/beta hydrolase fold,"Abhydrolase_1,Abhydrolase_6"
Ssa05016311	0.077	0.087	0.264	0.142667	0.067	0	20.943	7.00333	0	74.011	27.737	33.916	0	0	0.206	0.0686667	2.114	0	0.173	0.762333	49.0888	237.729	11.1019	0	0	0	0	0	0	0	0	0	1.741	0	0	0	0	0	0	0	0	0	#DIV/0!	#DIV/0!	0.507	1.86	0.708	Ssa02010635,"Protein of unknown function, DUF547","DUF547,FBA_1,Lzipper-MIP1"
Ssa01002837	0.124	0.14	1.244	0.502667	34.643	18.653	20.058	24.4513	0.264	3.706	1.228	1.73267	0.141	0.343	0.444	0.309333	370.259	203.644	141.874	238.592	48.6432	3.44695	771.311	0	0	0	0	0	0	0	0	0	1.495	0	0	0	0	0	0	0	0	0	#DIV/0!	#DIV/0!	32.611	22.991	24.398	Ssa03013907,Translin-associated protein,Translin
Ssa13008882	0.234	0	0.201	0.145	9.156	8.236	3.241	6.87767	1.121	0.873	1.28	1.09133	0	0.04	0.209	0.083	0.612	0.218	0.132	0.320667	47.4322	7.52644	3.86345	0.053	0	0.061	0.038	0	0.149	0.147	0.0986667	0.62	1.449	0.332	0.183	0.117	1.826	0.708667	0.061	0.063	0.109	0.0776667	2.59649	0.109595	12.784	28.306	24.607	Ssa09024997,Mitochondrial import inner membrane translocase subunit,"SAM_1,Tim17"
Ssa03013430	0.234	0	0.201	0.145	8.952	8.135	3.241	6.776	1.121	0.873	1.28	1.09133	0	0.04	0.209	0.083	0.612	0.218	0.132	0.320667	46.731	7.52644	3.86345	0.053	0	0.061	0.038	0	0.149	0.147	0.0986667	0.62	1.449	0.332	0.183	0.117	1.76	0.686667	0.061	0.063	0.109	0.0776667	2.59649	0.113107	55.543	30.246	32.888	Ssa01002538,3-isopropylmalate dehydratase small,Aconitase_C
Ssa13008343	0.022	0	0.621	0.214333	0	0.019	29.246	9.755	48.686	0.164	0.103	16.3177	0	0	0.098	0.0326667	0	0	0	0	45.5132	76.1322	0	0.02	0.038	0	0.0193333	0	0	0	0	0	0.09	0	0.023	0	0.024	0.0156667	0	0	0	0	0	0	18.949	22.954	11.079	Ssa09024477,WRKY transcription factor,WRKY
Ssa01002328	0.33	0.233	0.354	0.305667	12.371	21.263	7.303	13.6457	4.282	6.376	6.153	5.60367	0.657	0.456	2.468	1.19367	0.98	0.692	0.232	0.634667	44.6423	18.3326	0.531695	0	0	0	0	0.049	0	0.052	0.0336667	0	0.213	0	0	0	0	0	0	0	0.038	0.0126667	#DIV/0!	#DIV/0!	2.081	3.809	2.565	Ssa01000958,Cytochrome p450,p450
Ssa11005271	0	0	0.444	0.148	0	0	18.581	6.19367	3.44	21.68	17.16	14.0933	0.098	0	0.308	0.135333	2.702	4.415	0	2.37233	41.8491	95.2252	17.5296	4.292	2.366	0	2.21933	0.103	0	0	0.0343333	0	6.313	0	0	0	0	0	0.268	0.838	0.16	0.422	0.0154701	#DIV/0!	2.619	0.846	4.148	Ssa07020906,-,-
Ssa02009578	0.388	2.456	0.267	1.037	29.028	49.387	51.044	43.153	12.277	450.5	306.36	256.379	8.132	73.33	44.424	41.962	1.586	1.7	0.438	1.24133	41.6133	247.231	0.0295823	0.176	0.333	0.204	0.237667	16.09	8.402	8.787	11.093	302.07	227.338	100.285	62.097	24.519	64.896	50.504	4.353	6.967	16.953	9.42433	46.6746	0.186606	97.741	99.098	130.445	Ssa04014300,receptor,"PA,cEGF"
Ssa07021435	0.522	0.639	1.683	0.948	31.219	62.81	17.697	37.242	1.877	7.889	10.505	6.757	1.387	1.957	2.255	1.86633	584.194	363.053	166.898	371.382	39.2848	7.12764	198.99	0	0.037	0	0.0123333	0	0	0	0	0.184	0.404	0.049	0.045	0.087	0	0.044	0.181	0	0.081	0.0873333	0	1.98485	20.158	8.839	15.297	Ssa02010125,Senescence-associated protein,Senescence
Ssa07020018	0	0	4.415	1.47167	0.067	0.331	165.568	55.322	1253.56	5.97	3.355	420.961	0.262	0.212	3.015	1.163	9.256	0.643	0.086	3.32833	37.5914	286.044	2.86185	102.808	82.006	0	61.6047	0.184	0	5.112	1.76533	0.65	38.707	5.75	1.436	4.152	1.282	2.29	0.159	16.997	0.214	5.79	0.0286558	2.52838	4.084	4.979	4.933	Ssa11006389,UDP-glucoronosyl and UDP-glucosyl transferase,UDPGT
Ssa06019346	3.808	2.015	11.221	5.68133	217.677	218.052	203.111	212.947	439.445	215.002	269.864	308.104	484.269	252.926	337.256	358.15	121.542	186.81	148.027	152.126	37.4818	54.2309	0.424756	9.603	12.448	13.406	11.819	1210.13	1285.54	2368.71	1621.46	942.846	632.567	2214.08	1581.61	1971.81	1825.3	1792.9	977.375	715.193	1095.8	929.455	137.191	0.518407	17.049	6.96	95.374	Ssa09024932,Hypoxia induced protein conserved region,HIG_1_N
Ssa02011849	0	0	0.813	0.271	11.995	8.177	10.036	10.0693	0	1.298	0.845	0.714333	0	0	0	0	104.747	31.507	17.989	51.4143	37.1562	2.63592	#DIV/0!	0	0	0	0	0	0	0	0	0.143	0.14	0	0	0	0	0	0	0	0	0	#DIV/0!	#DIV/0!	0	0.256	0.292	Ssa05016987,stigma-specific Stig1 family protein,Stig1
Ssa07019950	0.035	0	0	0.0116667	0.03	0.537	0.718	0.428333	0.828	0.111	0.27	0.403	0.393	0.215	0.309	0.305667	0.033	0.064	0	0.0323333	36.7143	34.5429	0.10578	0	0	0	0	0	0	0	0	0	0	0	0	0	0	0	0	0	0.032	0.0106667	#DIV/0!	#DIV/0!	0	0.092	0.21	Ssa02011912,"Dirigent proteins impart stereoselectivity on the phenoxy radical-coupling reaction, yielding optically active lignans from two molecules of coniferyl alcohol in the biosynthesis of lignans, flavonolignans, and alkaloids and thus plays a central role in plant secondary metabolism",Dirigent
Ssa07021451	0.043	0	0.074	0.039	0.558	1.7	1.947	1.40167	0	0.137	0	0.0456667	0	0	0.115	0.0383333	0	0	0	0	35.9402	1.17094	0	0	0	0	0	0	0	0	0	0	0	0	0	0	0	0	0	0	0	0	#DIV/0!	#DIV/0!	16.07	11.342	8.447	Ssa12007584,Functions as component of the Arp2 3 complex which is involved in regulation of actin polymerization and together with an activating nucleation-promoting factor (NPF) mediates the formation of branched actin networks,P16-Arc
Ssa10004110	0	0	0.038	0.0126667	0	0.038	1.296	0.444667	0	0	0.034	0.0113333	0.149	0.121	0	0.09	0	0	0	0	35.1053	0.894737	0	0	0	0	0	0	0	0	0	0	0	0	0.045	0	0	0.015	0	0	0	0	#DIV/0!	0	0.266	0	0	Ssa13009031,EC protein homolog,Metallothio_PEC
Ssa09024280	0	0	0.06	0.02	0	0	2.086	0.695333	0	4.196	1.811	2.00233	0.08	0.049	0	0.043	0	0	0.079	0.0263333	34.7667	100.117	0.612403	0	0	0	0	0	0	0	0	0	3.626	0	0.073	0	0	0.0243333	0	0	0	0	#DIV/0!	0	17.765	21.369	21.565	Ssa07021637,Dipeptidyl peptidase,"DPPIV_N,Peptidase_S9"
Ssa07021114	0.132	0.056	0.141	0.109667	4.775	4.331	2.115	3.74033	0.105	0.175	0.231	0.170333	0.131	0.136	0.132	0.133	0.328	0.26	0.148	0.245333	34.1064	1.55319	1.84461	0.015	0.014	0	0.00966667	0	0	0.021	0.007	0.017	0.119	0	0	0	0	0	0	0	0.015	0.005	0.724138	#DIV/0!	5.616	7.335	7.386	Ssa13008730,Metal tolerance protein,Cation_efflux
Ssa04015030	0	0	0.021	0.007	0.022	0	0.69	0.237333	0	0.372	0.233	0.201667	0.028	0	0	0.00933333	0	0.162	1.291	0.484333	33.9048	28.8095	51.8929	0.158	0	0.105	0.0876667	0	0	0	0	0.079	0.18	0	0	0	0	0	0.129	0.027	0	0.052	0	#DIV/0!	173.944	56.6	105.696	Ssa05017346,PPIases accelerate the folding of proteins. It catalyzes the cis-trans isomerization of proline imidic peptide bonds in oligopeptides,Pro_isomerase
Ssa01001603	0	0	0.202	0.0673333	0	0	6.745	2.24833	20.841	17.298	3.581	13.9067	0	0.163	1.26	0.474333	2.904	0.986	0	1.29667	33.3911	206.535	2.73366	0	0	0	0	0	0	0	0	0	0.243	0	0	0	0	0	0	0	0	0	#DIV/0!	#DIV/0!	1.236	0.628	0.922	Ssa08021985,squamosa,SBP
Ssa09025290	0.234	1.501	0.94	0.891667	18.884	38.257	30.685	29.2753	784.268	447.008	286.203	505.826	129.138	99.534	71.534	100.069	12.472	11.065	9.423	10.9867	32.8321	567.282	0.109791	0	0.268	0.082	0.116667	3.369	4.973	1.867	3.403	261.767	96.112	26.181	8.45	6.579	159.766	58.265	0.324	0.338	0.873	0.511667	29.1686	0.00878172	42.297	31.678	31.613	Ssa11005253,Peroxisome biogenesis protein,Pex19
Ssa10003261	1.518	0.829	0.673	1.00667	32.553	38.591	19.901	30.3483	11.179	11.064	15.177	12.4733	9.472	2.776	6.864	6.37067	35.812	19.109	17.598	24.173	30.1474	12.3907	3.79442	0.044	0	0	0.0146667	0	1.371	0	0.457	0	5.152	0.056	0	0	0	0	0.051	0	0	0.017	31.1591	#DIV/0!	0.56	0.722	1.02	Ssa01000587,Cytochrome p450,p450
Ssa09024998	0	0	0.034	0.0113333	0.035	0.208	0.753	0.332	0.128	0.555	0.501	0.394667	0	0.166	0.179	0.115	0	0	0.045	0.015	29.2941	34.8235	0.130435	0	0	0	0	0	0	0	0	0	0.165	0	0	0	0	0	0	0	0	0	#DIV/0!	#DIV/0!	0	0	0	Ssa11005449,ACT domain,ACT
Ssa03012787	0.056	0.063	0.386	0.168333	0	3.346	11.222	4.856	139.197	145.914	93.249	126.12	0.767	2.097	1.605	1.48967	1.281	0.262	0.19	0.577667	28.8475	749.228	0.387783	0.254	0.145	0	0.133	0	0.071	0.141	0.0706667	59.799	509.818	9.696	135.195	17.282	7.197	53.2247	20.697	128.872	0.105	49.8913	0.531328	0.937372	13.535	18.851	25.313	Ssa12007301,Belongs to the 14-3-3 family,2014/3/3
Ssa05015964	0	0	0.08	0.0266667	0	0	2.304	0.768	0	1.192	0.073	0.421667	0	0	0	0	0	0	0.315	0.105	28.8	15.8125	#DIV/0!	0	0	0	0	0	0	0	0	0	0.192	0	0.097	0	0	0.0323333	0	0	0	0	#DIV/0!	0	44.385	114.742	80.436	Ssa11005520,Phosphatidylserine synthase,PSS
Ssa06019356	0.03	0.052	0.091	0.0576667	0.106	0.105	4.77	1.66033	0.462	3.617	2.459	2.17933	0	0.063	0.041	0.0346667	0.318	0.142	0.274	0.244667	28.7919	37.7919	7.05769	0	0	0	0	0	0	0	0	0.048	0.801	0	0	0	0	0	0.016	0	0	0.00533333	#DIV/0!	#DIV/0!	0.899	4.982	1.89	Ssa01001285,RING/Ubox like zinc-binding domain,"RRM_1,zf-RING_4"
Ssa12006963	0	0	0.954	0.318	6.755	16.934	2.745	8.81133	0	3.353	4.623	2.65867	0	0	0.165	0.055	267.881	114.62	63.176	148.559	27.7086	8.36059	2701.07	0	0	0	0	0	0	0	0	0	0.191	0	0	0	0	0	0	0.2	0	0.0666667	#DIV/0!	#DIV/0!	0.524	0.306	0.064	Ssa03012689,"Protein of unknown function, DUF547","DUF547,Lzipper-MIP1"
Ssa03013520	0.133	0	0.458	0.197	0	0.038	16.314	5.45067	0	6.398	13.435	6.611	0	0.123	0.04	0.0543333	3.083	0.58	0.1	1.25433	27.6684	33.5584	23.0859	0	0	0.047	0.0156667	0	0	0	0	0	0.275	0	0	0	0	0	0	0	0	0	0	#DIV/0!	1.219	2.794	1.962	Ssa01002354,G-type lectin S-receptor-like serine threonine-protein kinase,"B_lectin,PAN_2,Pkinase,S_locus_glycop"
Ssa13008794	0.133	0	0.458	0.197	0	0.038	16.27	5.436	0	6.303	13.331	6.54467	0	0.123	0.04	0.0543333	2.999	0.58	0.1	1.22633	27.5939	33.2217	22.5706	0	0	0.047	0.0156667	0	0	0	0	0	0.275	0	0	0	0	0	0	0	0	0	0	#DIV/0!	0.879	0.351	0.934	Ssa02009871,ethylene-responsive transcription factor,AP2
Ssa08022980	0.217	0.588	0.093	0.299333	8.843	14.347	1.438	8.20933	1.074	9.92	16.516	9.17	0	0.105	0	0.035	0.907	0.283	0.244	0.478	27.4254	30.6347	13.6571	0.02	0.019	0	0.013	0	0	0.027	0.009	25.14	55.194	3.104	5.909	0.544	1.112	2.52167	63.204	16.645	0.101	26.65	0.692308	10.5684	2.635	1.408	3.52	Ssa09024678,P-loop nucleoside triphosphate hydrolase superfamily protein,"AAA_11,AAA_12"
Ssa04014483	0	0.028	0	0.00933333	0.044	0.196	0.524	0.254667	0.04	0.161	0.138	0.113	0.057	0.035	0.045	0.0456667	0.024	0.023	0	0.0156667	27.2857	12.1071	0.343066	0	0	0	0	0	0	0.095	0.0316667	0.053	2.576	0.057	1.389	0	0.112	0.500333	0	0.054	0	0.018	#DIV/0!	0.035976	1.395	1.391	1.271	Ssa06019121,Smr domain,"MutS_V,Smr"
Ssa13008453	0	0	0.027	0.009	0	0	0.712	0.237333	0	0.133	0.489	0.207333	0	0.022	0.028	0.0166667	0	0.058	0.141	0.0663333	26.3704	23.037	3.98	0	0	0	0	0	0	0	0	0.033	0.016	0	0	0	0.157	0.0523333	2.534	1.184	1.194	1.63733	#DIV/0!	31.2866	0	0	0	Ssa05016264,L-type lectin-domain containing receptor kinase IX.1-like,"Lectin_legB,Pkinase"
Ssa01000245	0	0	0.127	0.0423333	0	0.256	3.074	1.11	0	0	0.347	0.115667	0.168	0	0	0.056	0.141	0	0	0.047	26.2205	2.73228	0.839286	0	0	0	0	0	0	0	0	0	0	0	0	0	0	0	0	0	0	0	#DIV/0!	#DIV/0!	0.341	0.045	0	Ssa09024161,"oxidoreductase At1g06690, chloroplastic-like",Aldo_ket_red
Ssa02009743	0.109	0.124	1.034	0.422333	0	0.283	32.788	11.0237	1.048	6.531	1.538	3.039	0	0.832	0.293	0.375	1.975	0.306	3.699	1.99333	26.1018	7.19574	5.31556	0	0	0	0	0	0	0	0	0	0	0	0	0	0	0	0	0	0	0	#DIV/0!	#DIV/0!	3.103	2.813	4.241	Ssa04015334,-,-
Ssa02009579	2.306	5.133	1.806	3.08167	59.486	98.705	81.843	80.0113	868.917	679.561	646.403	731.627	270.055	158.425	78.592	169.024	46.232	45.018	18.687	36.6457	25.9637	237.413	0.216807	0.368	0.553	0.249	0.39	30.133	33.106	31.165	31.468	679.607	373.492	238.555	87.339	38.033	99.03	74.8007	7.146	11.985	22.949	14.0267	80.6872	0.187521	3.719	4.006	5.931	Ssa12007486,-,-
Ssa08022982	0.086	0.049	6.144	2.093	87.64	55.469	18.283	53.7973	15.412	24.114	50.504	30.01	0.834	0.268	0.577	0.559667	40.238	14.811	6.992	20.6803	25.7035	14.3383	36.9512	1.17	0.148	0	0.439333	0	0.384	0	0.128	7.075	79.223	0.294	0.851	0.086	0.096	0.344333	131.76	9.686	0.602	47.3493	0.291351	137.51	0.042	0.405	0.077	Ssa10003918,Belongs to the aldehyde dehydrogenase family,Aldedh
Ssa02010170	0	0.045	0.136	0.0603333	0.103	0.204	4.33	1.54567	42.511	0.126	1.756	14.7977	1.93	4.554	1.55	2.678	0.787	1.066	3.911	1.92133	25.6188	245.265	0.717451	0.143	0.068	0	0.0703333	0	0	0	0	0.167	0.203	0.134	0	0.04	0.395	0.145	10.726	0.384	2.093	4.401	0	30.3517	842.613	506.92	599.777	Ssa03012254,Belongs to the SKP1 family,"Skp1,Skp1_POZ"
Ssa02009745	0.118	0.067	31.253	10.4793	0.513	0.969	795.022	265.501	14850.3	474.265	39.253	5121.27	3.966	3.717	48.479	18.7207	116.441	0	23.697	46.7127	25.3357	488.701	2.49525	37.814	40.438	0.186	26.146	0	0.15	1.114	0.421333	43.552	316.556	52.526	0	0.355	8.029	2.79467	1.533	117.908	0.66	40.0337	0.0161146	14.325	99.169	99.06	433.147	Ssa09025792,alcohol dehydrogenase,"ADH_N,ADH_zinc_N"
Ssa07021450	0	0	0.04	0.0133333	0	0.322	0.691	0.337667	0	0	0	0	0	0	0	0	0	0	0	0	25.325	0	#DIV/0!	0	0	0	0	0	0	0	0	0	0	0	0	0	0	0	0	0	0	0	#DIV/0!	#DIV/0!	1.574	19.279	9.231	Ssa12006633,Belongs to the glycosyl hydrolase 18 family,Glyco_hydro_18
Ssa08023222	0.065	0.036	0	0.0336667	0.224	0.696	1.627	0.849	0.052	1.891	1.915	1.286	0.11	1.517	2.823	1.48333	0	0	0	0	25.2178	38.198	0	0.029	0	0	0.00966667	0	0	0	0	0.068	0.067	0	0.101	0.065	0.036	0.0673333	0	0	0.03	0.01	0	0.148515	29.105	210.025	130.264	Ssa09025626,transcription factor,-
Ssa06017841	1.297	1.821	0.542	1.22	31.316	25.69	34.525	30.5103	17.404	83.909	55.693	52.3353	7.977	28.571	26.228	20.9253	2.031	2.383	1.224	1.87933	25.0085	42.8978	0.0898114	5.934	8.148	12.799	8.96033	26.104	14.675	21.853	20.8773	266.791	133.215	36.737	71.019	40.007	13.002	41.3427	41.726	45.83	114.21	67.2553	2.32997	1.62678	12.503	6.484	11.189	Ssa07021356,Belongs to the protein kinase superfamily. Ser Thr protein kinase family,"LRRNT_2,LRR_1,LRR_6,LRR_8,Pkinase"
Ssa07021287	0.786	0.825	2.702	1.43767	49.115	48.69	5.333	34.3793	6.368	1.257	3.07	3.565	1.215	0.544	0.401	0.72	1.708	0.785	1.076	1.18967	23.9133	2.47971	1.65231	7.578	7.951	12.024	9.18433	2.22	3.074	21.889	9.061	2.975	13.677	26.217	16.702	3.209	3.004	7.63833	197.411	81.22	19.868	99.4997	0.986571	13.0264	9.463	11.215	15.216	Ssa06017515,histidine-containing phosphotransfer protein,Hpt
Ssa10004796	1.769	2.165	8.147	4.027	77.024	87.414	123.42	95.9527	261.644	117.669	164.989	181.434	472.809	286.378	419.775	392.987	159.494	235.464	232.442	209.133	23.8273	45.0544	0.532163	10.191	12.565	22.848	15.2013	610.849	570.787	1933.18	1038.27	600.769	454.61	1799.87	1810.92	2446	1513.9	1923.61	1246.69	913.365	1126.58	1095.54	68.3013	0.569526	62.842	55.74	71.18	Ssa01001308,ankyrin repeat-containing protein,"Ank_2,Ank_3,Ank_4,PGG"
Ssa02009747	0	0	0.094	0.0313333	0	0	2.164	0.721333	91.018	0	0.769	30.5957	0	0	0.098	0.0326667	0	0	0	0	23.0213	976.457	0	4.062	4.224	0.115	2.80033	0	0	0.138	0.046	43.115	69.649	144.005	0.796	1.206	1.341	1.11433	46.561	10.523	28.616	28.5667	0.0164266	25.6357	0.221	1.235	0.518	Ssa02010509,Cysteine-rich receptor-like protein kinase,"Pkinase_Tyr,Stress-antifung"
Ssa09025656	0	0	0.176	0.0586667	0.179	0	3.86	1.34633	0	1.861	0.602	0.821	0	0	0.046	0.0153333	0.537	0.526	0.637	0.566667	22.9489	13.9943	36.9565	0	0.176	0	0.0586667	0	0	0	0	0	0.159	0	0	0	0	0	0.107	0	0	0.0356667	0	#DIV/0!	5.009	7.748	6.554	Ssa02011003,Sulfurates the molybdenum cofactor. Sulfation of molybdenum is essential for xanthine dehydrogenase (XDH) and aldehyde oxidase (ADO) enzymes in which molybdenum cofactor is liganded by 1 oxygen and 1 sulfur atom in active form,"Aminotran_5,MOSC,MOSC_N"
Ssa07020336	0	0	0.041	0.0136667	0.126	0.042	0.763	0.310333	0	1.747	0.903	0.883333	0	0.333	0.086	0.139667	0	0	0.054	0.018	22.7073	64.6341	0.128878	0.175	0.083	0.051	0.103	0	0	0	0	0	0.796	0	0.05	0.097	0	0.049	0.05	0.052	0.045	0.049	0	1	36.655	27.991	37.856	Ssa01000469,"monodehydroascorbate reductase, cytoplasmic isoform 2",Pyr_redox_2
Ssa09025211	0	0.079	0.06	0.0463333	0.061	1.032	2.016	1.03633	0.337	1.274	2.305	1.30533	0.16	0.049	0	0.0696667	0.534	0.065	0.158	0.252333	22.3669	28.1727	3.62201	0	0.06	0	0.02	0.421	0.268	0.088	0.259	0.521	0.943	0	0.073	0.282	0	0.118333	0	0.076	0	0.0253333	12.95	0.214085	3.028	2.147	1.155	Ssa13009224,Probably inactive leucine-rich repeat receptor-like protein kinase,"LRRNT_2,LRR_1,LRR_6,LRR_8,Pkinase,Pkinase_Tyr"
Ssa01001487	0	0	0.029	0.00966667	0	0.146	0.502	0.216	0	0.144	0.317	0.153667	0	0.023	0	0.00766667	0	0	0	0	22.3448	15.8966	0	0	0	0	0	0	0	0	0	0	0	0	0	0	0	0	0	0	0	0	#DIV/0!	#DIV/0!	1.229	0.392	0.896	Ssa10003781,Transcription factor transcription regulator,-
Ssa01002411	0.048	0	0.185	0.0776667	0.602	0.35	4.156	1.70267	31.184	5.828	2.424	13.1453	0.543	1.75	5.586	2.62633	0.953	0.645	0.215	0.604333	21.9227	169.253	0.230105	9.058	6.103	1.052	5.40433	0.972	0.76	2.641	1.45767	18.994	25.224	46.879	132.453	79.774	182.309	131.512	15.092	12.256	88.18	38.5093	0.269722	0.29282	41.811	35.184	19.941	Ssa06017767,Nuclear transcription factor Y subunit,CBFD_NFYB_HMF
Ssa01000244	0	0.156	0.119	0.0916667	0.24	0.119	5.607	1.98867	0	0	0.432	0.144	0	0.096	0	0.032	0.394	0	0.467	0.287	21.6945	1.57091	8.96875	0	0	0.145	0.0483333	0	0	0	0	0	0	0	0	0	0	0	0	0	0	0	0	#DIV/0!	123.549	139.192	118.679	Ssa04015264,Domain of unknown function (DUF4666),DUF4666
Ssa09024976	0.453	0.102	0.194	0.249667	5.153	10.238	0.85	5.41367	0.217	0.241	0.707	0.388333	0.052	0.094	0.04	0.062	31.86	12.437	5.661	16.6527	21.6836	1.55541	268.591	0.082	0.078	0.19	0.116667	0.325	0.23	0.171	0.242	0.096	0.187	0.206	0	0.045	0.202	0.0823333	0.047	0.098	0.126	0.0903333	2.07429	1.09717	13.037	13.954	14.107	Ssa05016334,"Protein present in Fab1, YOTB, Vac1, and EEA1",FYVE
Ssa01002617	12.069	2.888	16.869	10.6087	190.184	232.54	263.805	228.843	382.94	257.661	289.475	310.025	549.887	415.466	577.747	514.367	230.794	291.06	275.088	265.647	21.5713	29.2238	0.516455	31.63	43.307	65.64	46.859	960.165	798.973	2561.49	1440.21	1551.57	1423.07	2736.8	2478.68	3053.82	1404.78	2312.43	1426.43	1160.09	1575.18	1387.23	30.735	0.599903	3.413	8.421	6.688	Ssa10004830,isoform X1,-
Ssa06019341	3.803	4.671	1.675	3.383	76.469	73.111	69.243	72.941	29.621	87.812	92.933	70.122	34.277	79.62	82.154	65.3503	11.675	11.066	10.661	11.134	21.561	20.7278	0.170374	1.395	2.728	2.17	2.09767	265.641	195.983	142.474	201.366	254.273	208.853	121.487	182.654	137.476	152.107	157.412	28.023	24.454	30.105	27.5273	95.9952	0.174874	2.254	1.284	0.48	Ssa02009608,Belongs to the TRAFAC class myosin-kinesin ATPase superfamily. Kinesin family,"HHH_3,Kinesin"
Ssa08022628	0	0	0.05	0.0166667	0.051	0.101	0.926	0.359333	0.28	0	0.046	0.108667	0	0.324	0	0.108	0.056	0	0	0.0186667	21.56	6.52	0.17284	0	0	0	0	0	0	0	0	0	0	0	0	0	0	0	0	0	0	0	#DIV/0!	#DIV/0!	1.823	3.732	3.008	Ssa05015924,Pentatricopeptide repeat-containing protein,"DYW_deaminase,PPR,PPR_2,X8"
Ssa01002410	0.048	0	0.164	0.0706667	0.374	0.412	3.778	1.52133	46.318	4.734	2.535	17.8623	0.462	1.42	6.418	2.76667	0.885	0.712	0.242	0.613	21.5283	252.769	0.221566	7.285	4.731	0.802	4.27267	0.943	0.82	2.401	1.388	16.566	21.012	43.679	108.996	54.315	164.221	109.177	11.275	9.134	66.735	29.048	0.324856	0.266063	0.128	0.204	0.35	Ssa06017806,Plant lipid transfer protein / seed storage protein / trypsin-alpha amylase inhibitor domain family,-
Ssa12007182	0.104	0.084	0.09	0.0926667	1.035	2.725	1.959	1.90633	0.024	0.682	0.512	0.406	0	0.072	0.027	0.033	0.255	0.069	0	0.108	20.5719	4.38129	3.27273	0.445	0.128	0.016	0.196333	0	0	0	0	0.032	0.415	0.085	0.046	0.045	0	0.0303333	0.108	0.048	0.014	0.0566667	0	1.86813	5.264	13.079	12.206	Ssa09024801,glycerol-3-phosphate acyltransferase,"Acyltransferase,HAD"
Ssa03012824	0.283	0.096	0.68	0.353	9.609	7.25	4.027	6.962	0.451	0.753	1.06	0.754667	0.225	0.196	0.151	0.190667	1.88	0.764	0.064	0.902667	19.7224	2.13787	4.73427	0.154	0.243	0.178	0.191667	0	0.036	0.249	0.095	0.27	0.525	5.715	0.47	0.283	1.386	0.713	0.44	0.367	0.921	0.576	0.495652	0.807854	2.627	0	1.396	Ssa09025136,EF-hand domain pair,"EF-hand_1,EF-hand_5"
Ssa10003781	0	0	0.063	0.021	0	0	1.237	0.412333	0.822	0.235	0.172	0.409667	0.084	0	0.066	0.05	0	0.069	0	0.023	19.6349	19.5079	0.46	0	0	0	0	0	0	0	0	0	0	0	0	0	0	0	0	0	0	0	#DIV/0!	#DIV/0!	0.833	0.547	0.58	Ssa06018307,galactinol--sucrose galactosyltransferase,Raffinose_syn
Ssa09024269	0	0	0.146	0.0486667	0.591	0.587	1.682	0.953333	0.271	0.362	0.664	0.432333	0.194	0.588	0.152	0.311333	0.323	0	0	0.107667	19.589	8.88356	0.345824	0	0	0	0	0	0	0	0	0	0.175	0	0	0.17	0.189	0.119667	0.176	0	0	0.0586667	#DIV/0!	0.490251	4.958	4.333	2.582	Ssa03013891,-,-
Ssa03014010	0.581	0.547	5.985	2.371	76.301	45.792	15.412	45.835	50.689	4.127	4.988	19.9347	1.762	1.138	0.778	1.226	90.749	26.867	16.141	44.5857	19.3315	8.4077	36.3668	7.361	3.321	0.102	3.59467	0	0	0	0	3.793	14.679	10.771	0.805	0.776	0.863	0.814667	4.521	8.368	5.856	6.24833	0	7.6698	34.569	42.243	53.048	Ssa05016148,FabA-like domain,FabA
Ssa09024232	0.256	0.204	0.091	0.183667	3.737	3.803	2.969	3.503	0.41	1.849	2.12	1.45967	1.185	4.934	3.988	3.369	0.373	0.829	0.323	0.508333	19.0726	7.94737	0.150886	0.055	0.013	0.032	0.0333333	0.054	0.038	0	0.0306667	0.112	0.109	0.034	0.016	0.076	0.134	0.0753333	0.031	0.033	0.084	0.0493333	0.92	0.654867	160.248	104.066	78.3	Ssa07021438,-,DUF740
Ssa06019452	0	0	0.053	0.0176667	0	0	1.009	0.336333	0	0.198	0	0.066	0	0	0	0	0.088	0.115	0.035	0.0793333	19.0377	3.73585	#DIV/0!	0	0	0	0	0	0	0	0	0	0.064	0	0	0	0	0	0	0.033	0	0.011	#DIV/0!	#DIV/0!	0.934	1.118	0.851	Ssa04014782,TMV resistance protein N-like,"NB-ARC,TIR"
Ssa08022665	0	0.101	0.077	0.0593333	0.155	0.385	2.824	1.12133	0.855	0.761	0.418	0.678	0	0.185	0.239	0.141333	0.085	0	0	0.0283333	18.8989	11.427	0.200472	0	0	0	0	0	0	0	0	0	0.829	0	0	0	0	0	0	0	0	0	#DIV/0!	#DIV/0!	0.771	0.231	0.527	Ssa13008563,-,-
Ssa05016446	0	0	0.098	0.0326667	0	0.099	1.697	0.598667	0.183	0.122	0.089	0.131333	0	0	0	0	0	0	0	0	18.3265	4.02041	#DIV/0!	0	0	0	0	0	0	0	0	0	0	0	0	0	0	0	0	0	0	0	#DIV/0!	#DIV/0!	11.202	23.73	25.912	Ssa09025873,Belongs to the major facilitator superfamily. Sugar transporter (TC 2.A.1.1) family,Sugar_tr
Ssa04015086	0.165	0.13	2.436	0.910333	0.588	20.886	28.493	16.6557	52.214	4.113	5.846	20.7243	1.032	4.082	4.815	3.30967	1.739	0.43	0	0.723	18.2962	22.7657	0.218451	0	0	0.017	0.00566667	0.039	0	0	0.013	4.996	1.514	0.056	1.132	3.834	1.231	2.06567	0.051	0.125	0.077	0.0843333	2.29412	0.0408262	0	0	0	Ssa03013531,NAD dependent epimerase/dehydratase family,"3Beta_HSD,Epimerase"
Ssa11006037	0	0	0.033	0.011	0	0	0.603	0.201	0	0	0.03	0.01	0	0	0	0	0	0	0	0	18.2727	0.909091	#DIV/0!	0	0	0	0	0	0	0	0	0	0	0	0	0	0.998	0.332667	0	0	0.018	0.006	#DIV/0!	0.0180361	0.191	0.42	0.131	Ssa06019631,Encoded by,SURNod19
Ssa01000541	0	0.03	0	0.01	0.023	0.023	0.5	0.182	0.127	0.255	0.145	0.175667	0	0	0	0	0.025	0	0	0.00833333	18.2	17.5667	#DIV/0!	0	0.068	0.084	0.0506667	0.032	0.034	0	0.022	0	0.027	0	0	0	0.267	0.089	0.469	0.115	0.099	0.227667	0.434211	2.55805	0.955	13.542	7.632	Ssa09025737,General transcription factor IIH subunit,Tfb4
Ssa11005718	0.252	0	0.216	0.156	1.75	0.543	6.098	2.797	0.402	0.805	2.161	1.12267	1.432	6.177	0.337	2.64867	0.598	0.703	3.686	1.66233	17.9295	7.19658	0.627611	4.215	3.022	2.509	3.24867	5.876	3.363	3.005	4.08133	2.266	2.337	3.715	33.619	22.572	26.073	27.4213	1.698	6.119	10.072	5.963	1.25631	0.217458	6.921	13.855	11.534	Ssa05017311,zinc finger CCCH domain-containing protein,"GYF,Plus-3,SWIB,zf-CCCH"
Ssa12006624	0	0	0.091	0.0303333	0.046	0	1.549	0.531667	0.17	0.057	0.104	0.110333	0	0.165	0.142	0.102333	0	0.074	0	0.0246667	17.5275	3.63736	0.241042	0.096	0.046	0.056	0.066	0	0.034	0	0.0113333	0.169	0.11	0.09	0.414	0.16	0.148	0.240667	0.882	0.602	0.692	0.725333	0.171717	3.01385	4.537	5.64	3.394	Ssa08022412,Belongs to the peptidase A1 family,"TAXi_C,TAXi_N"
Ssa10003757	1.092	0.677	0.272	0.680333	17.768	13.419	4.322	11.8363	2.926	3.757	2.917	3.2	5.615	1.95	3.588	3.71767	5.491	4.465	2.82	4.25867	17.3978	4.70358	1.14552	0.096	0.03	0.037	0.0543333	0	0.09	0	0.03	0.037	0.509	0.841	1.502	0.777	0.432	0.903667	0.037	0.076	0.033	0.0486667	0.552147	0.0538547	3.38	4.162	6.628	Ssa07021082,Protein of unknown function (DUF1230),DUF1230
Ssa08022981	0.085	0.514	0.708	0.435667	8.499	11.509	2.643	7.55033	2.269	13.089	17.467	10.9417	0	0.157	0	0.0523333	1.647	0.371	0.192	0.736667	17.3305	25.1148	14.0764	0.206	0.049	0.06	0.105	0.068	0.072	0	0.0466667	26.015	37.654	0.742	1.005	0.085	0.158	0.416	21.714	2.58	0.053	8.11567	0.444444	19.5088	1.7	0.814	1.549	Ssa04015148,In Between Ring fingers,"IBR,zf-C3HC4,zf-RING_UBOX"
Ssa12007281	0.148	0.042	0.032	0.074	0.645	1.474	1.725	1.28133	0.178	0.475	0.811	0.488	0.211	0.565	1.226	0.667333	0.071	0.242	0	0.104333	17.3153	6.59459	0.156344	0	0	0	0	0	0	0	0	0	0.153	0.042	0.039	0	0	0.013	0.077	0	0	0.0256667	#DIV/0!	1.97436	20.477	24.783	34.171	Ssa09024155,Transmembrane protein 56-like,TRAM_LAG1_CLN8
Ssa02012065	0	0	0.15	0.05	0	0	2.593	0.864333	0.419	0	0.034	0.151	0	0.181	0.117	0.0993333	0.208	0	0	0.0693333	17.2867	3.02	0.697987	0	0	0	0	0	0	0	0	0	0	0	0.227	0	11.292	3.83967	0	0.047	0	0.0156667	#DIV/0!	0.00408022	31.715	40.322	58.792	Ssa10004590,Haloacid dehalogenase-like hydrolase domain-containing protein At3g48420,HAD_2
Ssa04014425	7.038	5.814	11.562	8.138	130.891	137.498	149.504	139.298	299.598	162.584	200.483	220.888	380.857	328.431	407.683	372.324	199.184	302.152	285.197	262.178	17.1169	27.1428	0.704166	8.524	14.077	11.264	11.2883	321.247	301.453	910.409	511.036	657.8	528.932	859.816	1178.16	1592.01	933.886	1234.68	1214.28	824.926	1232.85	1090.68	45.2712	0.883371	0	0	0	Ssa07020209,beta-galactosidase,"BetaGal_dom4_5,Gal_Lectin,Glyco_hydro_35"
Ssa09024024	0	0	0.088	0.0293333	0.089	0	1.416	0.501667	0	3.38	1.438	1.606	0.233	0.283	0	0.172	0.194	0.191	0.807	0.397333	17.1023	54.75	2.31008	0.185	0.088	0	0.091	0	0	0	0	0.542	1.478	0	0	0	0	0	0	0.332	0	0.110667	0	#DIV/0!	0	0	0	Ssa10004318,Belongs to the glycosyl hydrolase 17 family,"Glyco_hydro_17,X8"
Ssa13008312	0	0	0.014	0.00466667	0.029	0.029	0.18	0.0793333	0.079	0.265	0.155	0.166333	0.057	0.069	0	0.042	0	0.015	0.019	0.0113333	17	35.6429	0.269841	0	0.014	0	0.00466667	0	0	0	0	0.035	0.085	0.056	0.052	0.05	0.018	0.04	0	0.018	0.031	0.0163333	0	0.408333	0	0	0	Ssa12006714,Kiwellin-like,-
Ssa12006692	0	0	0.292	0.0973333	1.33	1.908	1.682	1.64	23.348	35.523	25.757	28.2093	11.997	11.286	1.215	8.166	2.423	0.158	0.383	0.988	16.8493	289.822	0.120989	0	0	0.178	0.0593333	0.814	1.515	0.427	0.918667	38.004	11.754	8.496	7.955	4.09	17.048	9.69767	0.353	1.102	1.583	1.01267	15.4831	0.104424	0.079	0	0.109	Ssa11004943,Pentatricopeptide repeat-containing protein,"DYW_deaminase,PPR,PPR_2"
Ssa08023787	0.686	1.55	2.751	1.66233	33.704	44.144	5.996	27.948	6.392	26.092	28.314	20.266	1.953	2.135	1.124	1.73733	17.712	7.352	8.765	11.2763	16.8125	12.1913	6.4906	0.207	0.098	0.36	0.221667	0.548	0.582	0.431	0.520333	5.089	24.311	1.819	0.119	0.344	0.127	0.196667	39.06	15.699	7.772	20.8437	2.34737	105.985	261.16	108.759	183.689	Ssa08023873,deaminase,dCMP_cyt_deam_1
Ssa12007913	0.303	0.616	0.208	0.375667	0.264	0.026	18.651	6.31367	0	186.603	14.773	67.1253	0.035	0.021	0	0.0186667	2.333	0.988	2.357	1.89267	16.8066	178.683	101.393	0	0	0	0	0	0	0	0	0.418	1.408	0	0	0	0	0	0	0	0.028	0.00933333	#DIV/0!	#DIV/0!	22.426	37.709	25.315	Ssa01002679,acyl-CoA-binding domain-containing protein,"Kelch_1,Kelch_2,Kelch_3,Kelch_4,Kelch_5,Kelch_6"
Ssa09025792	27.935	22.417	39.795	30.049	537.541	776.125	178.627	497.431	33.167	60.09	103.38	65.5457	21.873	32.036	40.373	31.4273	1119.29	779.124	243.892	714.102	16.554	2.18129	22.7223	26.223	31.39	31.085	29.566	9.965	9.583	18.391	12.6463	13.993	22.215	11.138	13.322	14.066	9.787	12.3917	16.042	11.742	12.142	13.3087	0.427732	1.074	39.463	22.226	18.479	Ssa08023737,RIBOSOMAL protein,Ribosomal_L23
Ssa04014373	0	0	0.028	0.00933333	0	0.028	0.434	0.154	0	0.069	0.051	0.04	0	0.022	0	0.00733333	0.031	0	0.018	0.0163333	16.5	4.28571	2.22727	0	0	0	0	0	0	0	0	0	0	0	0	0	0	0	0	0	0	0	#DIV/0!	#DIV/0!	6.671	6.747	3.595	Ssa07020983,"Protein DCL, chloroplastic-like",DUF3223
Ssa13008568	0	0	0.052	0.0173333	0.026	0.207	0.624	0.285667	5.802	1.761	7.433	4.99867	1.094	6.312	2.119	3.175	2.168	0.448	0.406	1.00733	16.4808	288.385	0.31727	0.435	0.077	0	0.170667	0	0.038	0	0.0126667	0.954	0.898	2.183	1.561	1.294	1.137	1.33067	0.062	0.26	0.196	0.172667	0.0742188	0.12976	27.655	25.44	19.749	Ssa10003358,Sieve element occlusion,"SEO_C,SEO_N"
Ssa01001540	0	0	0.024	0.008	0	0	0.393	0.131	0	0.091	0.067	0.0526667	0.065	0.079	0.025	0.0563333	0	0	0	0	16.375	6.58333	0	0	0	0	0	0	0	0	0	0	0.293	0	0	0	0.032	0.0106667	0	0	0	0	#DIV/0!	0	113.806	76.585	82.774	Ssa08022214,Caspase domain,Peptidase_C14
Ssa12007911	0.273	0.616	0.234	0.374333	0.264	0.026	18.051	6.11367	0	175.195	13.897	63.0307	0.035	0.021	0	0.0186667	2.391	0.876	2.084	1.78367	16.3321	168.381	95.5536	0	0	0	0	0	0	0	0	0.385	1.72	0	0	0	0	0	0	0	0.028	0.00933333	#DIV/0!	#DIV/0!	36.369	36.596	35.554	Ssa01001375,Pre-mRNA-splicing factor,Slu7
Ssa06019543	0.264	0.795	0.227	0.428667	5.43	8.508	7.049	6.99567	23.884	85.255	48.643	52.594	11.515	18.312	11.865	13.8973	2.173	1.885	1.983	2.01367	16.3196	122.692	0.144896	0.478	0.151	0.369	0.332667	3.582	3.359	2.876	3.27233	68.879	29.141	6.994	9.514	6.878	29.015	15.1357	1.37	1.997	2.375	1.914	9.83667	0.126456	1.58	3.278	2.303	Ssa11006279,MLP-like protein,Bet_v_1
Ssa06018757	0.042	0	0	0.014	0.147	0.328	0.209	0.228	0.135	0.225	0.198	0.186	0.481	1.197	1.131	0.936333	0.08	0.118	0.143	0.113667	16.2857	13.2857	0.121396	1.262	3.803	3.544	2.86967	92.17	93.286	82.481	89.3123	29.072	23.219	31.454	43.239	37.152	29.87	36.7537	7.363	10.814	6.642	8.273	31.1229	0.225093	68.171	142.617	69.294	Ssa03013695,Glyoxalase/Bleomycin resistance protein/Dioxygenase superfamily,Glyoxalase
Ssa05016681	0	0	0.036	0.012	0	0	0.583	0.194333	0	0	0	0	0	0.029	0	0.00966667	0.04	0	0	0.0133333	16.1944	0	1.37931	0	0	0	0	0	0	0	0	0	0	0	0	0	0.891	0.297	0	0	0.039	0.013	#DIV/0!	0.043771	108.909	55.872	74.983	Ssa06019595,RNA-binding protein,RRM_1
Ssa08022277	0	0	0.148	0.0493333	0	0	2.38	0.793333	0.11	0.183	0.725	0.339333	0	0	0	0	0.033	0	0.039	0.024	16.0811	6.87838	#DIV/0!	0	0	0	0	0	0	0	0	0	0	0	0	0	0	0	0	0	0	0	#DIV/0!	#DIV/0!	3.708	6.067	5.666	Ssa08023136,Synaptotagmin-5-like,"C2,SMP_LBD"
Ssa02011333	0	0	0.148	0.0493333	0	0	2.38	0.793333	0.11	0.183	0.725	0.339333	0	0	0	0	0.033	0	0.039	0.024	16.0811	6.87838	#DIV/0!	0	0	0	0	0	0	0	0	0	0	0	0	0	0	0	0	0	0	0	#DIV/0!	#DIV/0!	0.104	0.598	0.114	Ssa12007399,Pentatricopeptide repeat-containing protein,"PPR,PPR_1,PPR_2,PPR_3"
Ssa13008547	0.091	0	0.078	0.0563333	1.224	1.177	0.314	0.905	0.798	0.823	1.241	0.954	0.775	0.094	0.284	0.384333	0.259	0.169	0.307	0.245	16.0651	16.9349	0.637467	0	0	0	0	0	0	0	0	0	0.141	0	0	0	0	0	0	0	0	0	#DIV/0!	#DIV/0!	40.696	57.535	72.281	Ssa10004587,zinc finger CCCH domain-containing protein,"zf-CCCH,zf-CCCH_2"
Ssa13008344	0	0	0.019	0.00633333	0	0	0.303	0.101	0	0.023	0	0.00766667	0	0.015	0.02	0.0116667	0	0	0	0	15.9474	1.21053	0	0.297	0.244	0	0.180333	0.105	0	0.055	0.0533333	17.246	39.961	8.474	1.365	0.241	0.414	0.673333	22.281	2.412	8.778	11.157	0.295749	16.5698	2.168	2.454	2.91	Ssa09024605,PPR repeat,"PPR,PPR_2"
Ssa06019524	0.321	0.073	0.276	0.223333	1.674	5.376	3.555	3.535	626.795	259.069	167.825	351.23	239.99	93.345	71.2	134.845	10.123	17.88	3.762	10.5883	15.8284	1572.67	0.0785223	0.058	0	0	0.0193333	1.384	2.86	1.13	1.79133	281.597	28.414	19.173	8.81	11.387	135.241	51.8127	0.133	0.139	1.076	0.449333	92.6552	0.00867227	0.184	0.042	0.072	Ssa08023626,Methyltransferase,Methyltransf_29
Ssa06019308	0.141	0.319	0.364	0.274667	5.161	0.976	6.851	4.32933	1.806	0.904	1.987	1.56567	0	0.782	17.422	6.068	0.134	0.527	0.319	0.326667	15.7621	5.70024	0.0538343	0.896	0.606	1.187	0.896333	9.988	7.017	23.281	13.4287	26.956	28.005	18.623	41.743	34.429	53.708	43.2933	4.842	3.82	7.632	5.43133	14.9818	0.125454	6.039	6.502	8.707	Ssa04015462,Serine threonine-protein phosphatase 7 long form homolog,PMD
Ssa11005272	0	0	1.11	0.37	0	0	17.473	5.82433	2.614	38.307	14.872	18.5977	0.098	0	0.154	0.084	4.093	0.642	0.097	1.61067	15.7414	50.264	19.1746	4.994	1.626	0	2.20667	0.103	0	0	0.0343333	0	2.401	0.098	0	0	0	0	0	0.093	0.08	0.0576667	0.0155589	#DIV/0!	0.68	0.6	0.424	Ssa13008300,"D-arabinono-1,4-lactone oxidase","ALO,FAD_binding_4"
Ssa05016135	0.309	0.092	4.376	1.59233	28.989	23.932	21.701	24.874	6.134	3.834	5.618	5.19533	2.093	1.092	3.794	2.32633	8.86	4.958	1.724	5.18067	15.6211	3.26272	2.22697	4.377	3.156	3.86	3.79767	0.604	0.497	0.552	0.551	0.897	2.066	2.532	1.015	0.914	0.417	0.782	7.366	5.26	6.651	6.42567	0.145089	8.21697	0.584	0.155	0	Ssa02011722,synthase,"Terpene_synth,Terpene_synth_C"
Ssa09024705	0	0.085	0.257	0.114	0	0	5.259	1.753	0.239	0.958	0.409	0.535333	0	0.052	0	0.0173333	0.213	0.419	0.675	0.435667	15.3772	4.69591	25.1346	0	0	0	0	0.09	0.095	0	0.0616667	0	0.077	0.17	0	0	0	0	0.155	0	0	0.0516667	#DIV/0!	#DIV/0!	12.4	4.229	2.932	Ssa13009422,Belongs to the synaptobrevin family,"Longin,Synaptobrevin"
Ssa04015016	0	0	0.096	0.032	0.391	0.194	0.889	0.491333	0	0.239	0.614	0.284333	0.128	0.233	0	0.120333	0.427	0	0.633	0.353333	15.3542	8.88542	2.93629	0	0.096	0.118	0.0713333	0.135	0.143	0.141	0.139667	0.357	0.348	0.128	0	0	0	0	0.35	1.093	0.105	0.516	1.95794	#DIV/0!	123.125	58.565	166.121	Ssa07021030,-,-
Ssa01000316	0.782	0.252	2.398	1.144	12.489	11.956	26.619	17.0213	131.954	85.551	94.703	104.069	17.454	11.299	8.012	12.255	5.375	4.265	2.139	3.92633	14.8788	90.9697	0.320386	0.135	0.096	0.313	0.181333	1.872	4.548	1.076	2.49867	24.843	19.396	4.523	6.192	3.395	25.422	11.6697	0.193	0.282	0.485	0.32	13.7794	0.0274215	4.058	4.394	12.016	Ssa03014136,MLP-like protein,Bet_v_1
Ssa02009873	0.033	0	0.085	0.0393333	0.029	0.455	1.27	0.584667	1.893	0.176	0.412	0.827	0.15	0.342	1.588	0.693333	0.188	0.184	0.037	0.136333	14.8644	21.0254	0.196635	0	0	0	0	0	0	0.041	0.0136667	0.035	0	0.037	0	0	0	0	0	0	0	0	#DIV/0!	#DIV/0!	19.063	25.476	34.306	Ssa12007731,-,-
Ssa08022664	0	0	0.138	0.046	0.139	0.069	1.823	0.677	0.128	1.111	0.751	0.663333	0.091	0.111	0	0.0673333	0	0.075	0.09	0.055	14.7174	14.4203	0.816832	0	0	0	0	0	0	0	0	0	0.165	0	0	0	0	0	0	0	0	0	#DIV/0!	#DIV/0!	9.1	17.182	17.185	Ssa02010902,Deoxynucleoside kinase,dNK
Ssa13008090	0	0	0.093	0.031	0.094	0.094	1.18	0.456	0	0.289	0.169	0.152667	0.123	0	0.048	0.057	0	0	0	0	14.7097	4.92473	0	0	0	0	0	0	0	0	0	0	0	0	0	0	0	0	0	0	0	0	#DIV/0!	#DIV/0!	266.144	76.429	102.248	Ssa03012452,Calmodulin-like protein,"EF-hand_1,EF-hand_5,EF-hand_7,EF-hand_8"
Ssa10003795	1.774	1.057	3.131	1.98733	30.369	36.35	20.836	29.185	7.16	7.497	7.482	7.37967	3.011	2.03	3.774	2.93833	3.371	2.494	0.691	2.18533	14.6855	3.71335	0.743732	1.081	0.581	0.44	0.700667	0.155	0.739	0.487	0.460333	0.649	2.263	0.623	0.906	0.808	0.863	0.859	0.536	0.697	0.691	0.641333	0.656993	0.746605	2.739	1.639	1.638	Ssa04014730,A G-specific adenine DNA,"HhH-GPD,NUDIX_4"
Ssa06018908	0.048	0.054	0.288	0.13	0.748	1.157	3.691	1.86533	8.097	2.142	2.316	4.185	11.27	2.712	5.853	6.61167	3.181	4.947	2.642	3.59	14.3487	32.1923	0.54298	0.087	0.123	0.201	0.137	5.5	8.524	39.211	17.745	9.73	11.155	78.126	28.6	27.137	23.931	26.556	21.948	11.116	22.131	18.3983	129.526	0.692813	46.311	30.712	30.218	Ssa05016462,E3 ubiquitin-protein ligase,zf-UBR
Ssa07020545	0.448	0.414	0.455	0.439	5.167	8.648	5.074	6.29633	0.78	2.821	3.974	2.525	0.834	2.421	2.545	1.93333	0.735	0.379	0.138	0.417333	14.3424	5.75171	0.215862	1.032	0.489	0.043	0.521333	0.146	0.104	0.051	0.100333	1.078	1.302	1.433	2.074	2.163	0.998	1.745	0.211	0.22	0.834	0.421667	0.192455	0.241643	8.678	11.743	14.38	Ssa10003436,receptor-like protein kinase,Pkinase
Ssa11005533	1.15	0.649	1.097	0.965333	18.32	15.881	7.264	13.8217	65.778	7.965	11.221	28.3213	174.736	52.243	81.22	102.733	100.536	62.41	29.364	64.1033	14.318	29.3384	0.62398	0	0	0	0	0	0.406	0	0.135333	0	0	0	0	0	0	0	0	0	0	0	#DIV/0!	#DIV/0!	0.439	0	0.057	Ssa02009675,ubiquitin-protein transferase activity,zf-RING_2
Ssa12007006	0.035	0.119	0.091	0.0816667	0.153	0.061	3.242	1.152	0.225	0	0.138	0.121	0	0.219	0.22	0.146333	0.268	0	0.715	0.327667	14.1061	1.48163	2.23918	0	0	0	0	0	0	0	0	0	0	0	0	0	0	0	0	0	0	0	#DIV/0!	#DIV/0!	37.281	46.751	66.607	Ssa02011696,"Specifically methylates the N1 position of guanosine-37 in various cytoplasmic and mitochondrial tRNAs. Methylation is not dependent on the nature of the nucleoside 5' of the target nucleoside. This is the first step in the biosynthesis of wybutosine (yW), a modified base adjacent to the anticodon of tRNAs and required for accurate decoding",Met_10
Ssa05016673	0	0	0.046	0.0153333	0.023	0.069	0.554	0.215333	0.128	0.852	0.5	0.493333	0	0.018	0.024	0.014	0.506	0.099	0.06	0.221667	14.0435	32.1739	15.8333	0.121	0.023	0.084	0.076	0	0.034	0.067	0.0336667	0.339	0.495	0.091	0.443	0	0.03	0.157667	0.221	0.259	0.149	0.209667	0.442982	1.32981	0.256	1.636	1.051	Ssa10004882,strictosidine,Str_synth
Ssa03012715	0.07	0.159	0.664	0.297667	0.183	0.668	11.61	4.15367	2.469	1.648	4.226	2.781	0	0.875	0.314	0.396333	0.534	0.065	0.158	0.252333	13.9541	9.34267	0.636669	0	0.06	0	0.02	0	0	0	0	0	0	0.08	0	0	0	0	0.073	0.152	0.131	0.118667	0	#DIV/0!	11.49	6.36	9.998	Ssa01001426,DNA-binding domain in plant proteins such as APETALA2 and EREBPs,AP2
Ssa12006669	0	0	0.112	0.0373333	0	0.038	1.507	0.515	0.139	0.046	0	0.0616667	0	0.09	0.117	0.069	0.207	0	0	0.069	13.7946	1.65179	1	0	0	0	0	0	0	0	0	0	0	0	0	0	18.819	6.273	0.045	0.047	0.081	0.0576667	#DIV/0!	0.00919284	5.553	6.962	9.016	Ssa08023792,ABC transporter transmembrane region,"ABC_membrane,ABC_tran"
Ssa03012257	0.034	0	0	0.0113333	0	0.059	0.407	0.155333	0.438	0.11	0.268	0.272	0.039	0.119	0.153	0.103667	0.358	0.096	0	0.151333	13.7059	24	1.45981	0	0.029	0	0.00966667	0	0	0	0	0	0	0.039	0.036	0	0	0.012	0	0	0.032	0.0106667	0	0.888889	5.431	2.106	2.821	Ssa01001689,leucine-rich repeat extensin-like protein,"LRRNT_2,LRR_1,LRR_8"
Ssa13008986	0	0	0.029	0.00966667	0.296	0	0.101	0.132333	0	0.036	0.027	0.021	0	0.024	0.061	0.0283333	0	0	0	0	13.6897	2.17241	0	0	0	0	0	0	0	0	0	0	0	0.116	0	0	0	0	0.035	0	0.063	0.0326667	#DIV/0!	#DIV/0!	0.292	0.699	0	Ssa10003571,-,-
Ssa07020080	0	0	0.622	0.207333	0.079	0.156	8.236	2.82367	0.145	5.789	7.068	4.334	0.103	0.313	0	0.138667	0.172	0	0	0.0573333	13.619	20.9035	0.413462	0	0	0	0	0	0	0	0	0	1.027	0	0	0.091	0.202	0.0976667	0	0	0	0	#DIV/0!	0	0.218	0.974	0	Ssa10003051,Belongs to the major facilitator superfamily. Sugar transporter (TC 2.A.1.1) family,Sugar_tr
Ssa05016657	0.026	0	0.022	0.016	0.362	0.157	0.129	0.216	0.208	0.194	0.224	0.208667	0.208	0.18	0.279	0.222333	0.049	0	0.147	0.0653333	13.5	13.0417	0.293853	0.094	0.045	0.027	0.0553333	0.125	0.332	0.098	0.185	0.635	0.269	0.355	0.515	0.078	0.116	0.236333	0.027	0.028	0.024	0.0263333	3.34337	0.111425	8.277	5.437	2.081	Ssa13008303,"D-arabinono-1,4-lactone oxidase","ALO,FAD_binding_4"
Ssa01000378	0	0.025	0.019	0.0146667	0.058	0.135	0.398	0.197	0	1.715	3.036	1.58367	0	0	0	0	0.297	0	0	0.099	13.4318	107.977	#DIV/0!	0.02	0.019	0	0.013	0	0	0	0	0.024	1.937	0.025	0	0	0	0	0.139	0	0	0.0463333	0	#DIV/0!	7.812	6.32	5.213	Ssa03012285,-,DUF2839
Ssa05016162	14.051	16.287	6.684	12.3407	192.236	166.544	135.633	164.804	122.237	159.702	142.062	141.334	66.435	110.583	131.806	102.941	26.971	21.919	16.802	21.8973	13.3546	11.4527	0.212717	10.394	23.147	28.25	20.597	402.618	360.17	254.456	339.081	189.497	203.638	168.216	112.042	91.912	243.556	149.17	29.003	14.525	17.32	20.2827	16.4627	0.13597	2.126	10.28	10.485	Ssa07020539,cyclin-dependent protein kinase inhibitor,-
Ssa01000268	0.097	0	0	0.0323333	0.421	0.585	0.287	0.431	0.155	0.516	1.134	0.601667	0	0.134	0.086	0.0733333	0.184	0.27	0	0.151333	13.3299	18.6082	2.06364	0.088	0	0	0.0293333	0	0	0	0	0	0.1	0	0	0	0.108	0.036	0	0	0	0	0	0	119.049	96.027	108.642	Ssa07021033,Interferon-related developmental regulator,"IFRD,IFRD_C"
Ssa07020178	0	0.051	0	0.017	0.434	0.196	0.045	0.225	0	0.048	0.071	0.0396667	0.052	0.063	0.122	0.079	0	0.042	0	0.014	13.2353	2.33333	0.177215	0	0	0.048	0.016	0	0	0	0	0	0.141	0	0	0	0	0	0	0	0.042	0.014	0	#DIV/0!	45.17	46.437	51.294	Ssa06018567,Glycerophosphodiester phosphodiesterase,GDPD
Ssa09025184	0	0.039	0	0.013	0.09	0.179	0.239	0.169333	0.11	0.184	0.216	0.17	0	0.048	0	0.016	0.197	0.032	0.039	0.0893333	13.0256	13.0769	5.58333	0	0.03	0	0.01	0	0.044	0.043	0.029	0.073	0	0.118	0.036	0	0.116	0.0506667	0.072	0.075	0.129	0.092	2.9	1.81579	29.817	41.735	31.929	Ssa05016194,RING-H2 finger protein,zf-RING_2
Ssa09025793	6.683	3.359	16.513	8.85167	110.045	175.275	59.085	114.802	36.106	25.704	29.797	30.5357	43.929	16.185	27.266	29.1267	563.885	253.976	151.988	323.283	12.9695	3.44971	11.0992	0	0	0	0	0	0.712	0	0.237333	0.094	2.309	0.033	0	0.089	0.066	0.0516667	0.214	0.159	0.466	0.279667	#DIV/0!	5.4129	2.253	1.317	2.053	Ssa09024291,-,-
Ssa02010857	1.338	0	0.307	0.548333	7.524	10.632	3.089	7.08167	17.526	26.538	18.256	20.7733	71.595	54.728	11.714	46.0123	13.224	19.119	5.832	12.725	12.9149	37.8845	0.276556	0	0	0	0	0	0.454	0	0.151333	0	0.092	0	0	0	0	0	0	0	0	0	#DIV/0!	#DIV/0!	0.2	0	0	Ssa09025925,auxin-induced protein,Auxin_inducible
Ssa08022703	0.167	0	2.147	0.771333	5.939	12.949	10.549	9.81233	3.991	25.758	58.624	29.4577	1.991	2.765	3.497	2.751	6.491	3.105	2.629	4.075	12.7213	38.1906	1.48128	0.83	0.5	0.087	0.472333	0	0.106	0	0.0353333	0	18.742	1.987	0	0.835	0.278	0.371	1.297	2.882	1.474	1.88433	0.0748059	5.07907	0.984	0.785	0.422	Ssa03013201,Belongs to the cyclin family,"Cyclin_C,Cyclin_N"
Ssa02010569	0.041	0	0.142	0.061	0.717	0.712	0.898	0.775667	1.054	0.704	0.966	0.908	0.329	0.399	0.442	0.39	0.47	0.5	0.279	0.416333	12.7158	14.8852	1.06752	0.112	0.142	0.087	0.113667	0.642	0.683	0.259	0.528	1.049	1.107	0.375	0	0.165	0.23	0.131667	1.927	2.095	0.73	1.584	4.64516	12.0304	391.451	382.75	324.046	Ssa01002385,Superoxide dismutase,"Sod_Fe_C,Sod_Fe_N"
Ssa04015180	0	0	0.025	0.00833333	0.026	0.026	0.264	0.105333	0	0.253	0.185	0.146	0	0.062	0.053	0.0383333	0	0	0	0	12.64	17.52	0	0.188	0.076	0.062	0.108667	0.32	0.415	0.224	0.319667	2.389	1.745	0.337	0.956	2.647	0.132	1.245	0.801	0.77	1.381	0.984	2.94172	0.790361	5.833	9.666	7.291	Ssa06018715,-,-
Ssa12007185	0.094	0	0.161	0.085	0.816	1.702	0.65	1.056	10.945	1.401	3.079	5.14167	9.617	4.35	2.935	5.634	0.268	0.612	0.635	0.505	12.4235	60.4902	0.0896344	0	0.081	0	0.027	0.112	0.239	0	0.117	1.79	1.066	0	0.39	0.471	1.151	0.670667	0	0	0	0	4.33333	0	1.057	2.154	1.284	Ssa11005417,-,-
Ssa10003839	0.477	0.215	1.719	0.803667	0.58	0.165	29.131	9.95867	0.457	31.396	38.332	23.395	0.217	2.702	0.17	1.02967	3.079	1.421	2.148	2.216	12.3915	29.1103	2.15215	0.777	0.082	0.7	0.519667	0	0.364	0.24	0.201333	47.154	17.506	46.113	0	0.096	0.106	0.0673333	65.892	27.813	103.362	65.689	0.387428	975.579	0	0	0	Ssa12007145,Belongs to the iron ascorbate-dependent oxidoreductase family,"2OG-FeII_Oxy,DIOX_N"
Ssa05016160	13.256	15.451	6.473	11.7267	141.969	171.112	120.599	144.56	120.643	171.767	131.02	141.143	56.724	97.96	103.878	86.1873	29.942	29.518	23.979	27.813	12.3275	12.0361	0.322704	7.474	17.132	18.963	14.523	310.637	302.13	188.608	267.125	172.845	200.714	169.042	106.935	84.481	159.815	117.077	33.942	20.191	21.635	25.256	18.3932	0.215721	5.773	6.214	6.178	Ssa06018102,Leucine-rich repeat receptor-like protein kinase,"LRRNT_2,LRR_1,LRR_4,LRR_8,Pkinase,Pkinase_Tyr"
Ssa09024937	0	0	0.229	0.0763333	0	0.517	2.304	0.940333	2.764	0	0.312	1.02533	0	0.276	0.238	0.171333	0	0	0	0	12.3188	13.4323	0	0	0.171	0	0.057	0.08	0	0	0.0266667	0	0.206	1.361	0.484	0.067	0	0.183667	0.415	1.583	0.558	0.852	0.467836	4.63884	3.617	10.79	6.005	Ssa04014877,TMV resistance protein N-like,"NB-ARC,TIR"
Ssa02010929	0	0.086	0.065	0.0503333	0	0.131	1.724	0.618333	0.121	3.07	1.361	1.51733	0	0.524	0.474	0.332667	0.072	0	0.342	0.138	12.2848	30.1457	0.41483	0	0	0	0	0.182	0	0	0.0606667	0	0.313	0	0	0	0	0	0	0	0	0	#DIV/0!	#DIV/0!	0.538	1.86	1.666	Ssa01000046,Pentatricopeptide repeat-containing protein,"PPR,PPR_1,PPR_2,PPR_3"
Ssa07020670	0.646	0.235	3.986	1.62233	5.478	13.693	40.141	19.7707	2.249	9.302	8.924	6.825	0.893	3.64	8.35	4.29433	4.233	1.398	0.338	1.98967	12.1866	4.2069	0.463324	0.125	0.02	0.024	0.0563333	0	0.088	0	0.0293333	0.049	2.072	0.288	0.072	0.116	0.077	0.0883333	0.048	0.025	0.086	0.053	0.52071	0.6	5.595	4.083	4.849	Ssa04015194,-,-
Ssa12006953	0	0	0.387	0.129	0	0	4.71	1.57	0	8.496	3.758	4.08467	0	0	0	0	0	0	0	0	12.1705	31.6641	#DIV/0!	0	0	0	0	0	0	0	0	0.053	1.81	0	0	0	0	0	0	0	0	0	#DIV/0!	#DIV/0!	46.172	30.345	32.901	Ssa04014733,-,-
Ssa08022666	0	0	0.206	0.0686667	0.139	0.069	2.299	0.835667	0.256	1.196	0.751	0.734333	0.091	0.111	0	0.0673333	0	0.224	0.09	0.104667	12.1699	10.6942	1.55446	0	0	0	0	0	0	0	0	0	0.165	0	0	0	0	0	0	0	0	0	#DIV/0!	#DIV/0!	1.883	3.579	1.68	Ssa04014386,-,-
Ssa03012569	0.053	0.03	0.068	0.0503333	0.854	0.848	0.131	0.611	0	0.028	0	0.00933333	0.302	0.073	0.095	0.156667	0.227	0.074	0	0.100333	12.1391	0.18543	0.640426	0	0	0	0	0	0	0	0	0	0	0	0	0	0	0	0	0	0	0	#DIV/0!	#DIV/0!	48.667	51.395	73.439	Ssa07020899,Belongs to the ATCase OTCase family,"OTCace,OTCace_N"
Ssa09023954	0.975	0.336	1.179	0.83	8.551	12.961	8.683	10.065	3.934	4.776	5.526	4.74533	3.914	5.087	5.906	4.969	1.508	0.678	0.633	0.939667	12.1265	5.71727	0.189106	1.781	0.723	1.301	1.26833	1.267	1.178	0.956	1.13367	0.701	0.785	0.826	0.894	0.563	0.663	0.706667	0.137	0.071	0.231	0.146333	0.893824	0.207075	2.08	2.04	1.974	Ssa06018014,ZINC FINGER protein,"zf-C2H2,zf-C2H2_jaz"
Ssa10003827	0	0	0.054	0.018	0.036	0.018	0.597	0.217	0.432	0.067	0.179	0.226	0.024	0.014	0.037	0.025	0.059	0	0.07	0.043	12.0556	12.5556	1.72	0	0	0	0	0.025	0	0	0.00833333	0	0.043	0	0	0	0.023	0.00766667	0.043	0	0	0.0143333	#DIV/0!	1.86957	0.613	7.829	3.688	Ssa08023489,Belongs to the GRAS family,GRAS
Ssa06019748	0.315	0.237	1.081	0.544333	6.471	4.436	8.607	6.50467	42.524	5.365	4.749	17.546	28.399	8.047	19.57	18.672	6.375	2.246	0.709	3.11	11.9498	32.2339	0.16656	0	0	0	0	0.126	0	0.132	0.086	0.555	0.974	0.119	3.815	1.156	0.234	1.735	0.544	0.34	0.293	0.392333	#DIV/0!	0.226129	1.692	1.713	2.075	Ssa09024769,Aminotransferase class I and II,Aminotran_1_2
Ssa02011137	7.701	6.661	6.258	6.87333	83.711	102.261	60.253	82.075	723.36	401.174	338.796	487.777	541.703	218.581	197.231	319.172	106.454	97.082	75.998	93.178	11.9411	70.9665	0.291937	2.639	2.083	0.947	1.88967	67.551	89.28	51.114	69.315	389.122	181.48	329.217	165.635	89.08	260.279	171.665	40.764	55.639	65.683	54.0287	36.6811	0.314734	0.455	3.386	1.105	Ssa11004940,protein ROOT PRIMORDIUM DEFECTIVE,PORR
Ssa09025757	0	0.117	0.089	0.0686667	0.27	0.567	1.607	0.814667	0.442	0.074	0.486	0.334	0.079	0.072	0	0.0503333	0.033	0.032	0.039	0.0346667	11.8641	4.86408	0.688742	0.031	0	0	0.0103333	0	0	0	0	0	0.071	0.039	0.036	0	0	0.012	0	0.037	0	0.0123333	0	1.02778	11.919	13.026	12.482	Ssa08023870,plant mutator transposase zinc finger,"DBD_Tnp_Mut,MULE,PB1,SWIM"
Ssa13008395	0.04	0	0	0.0133333	0.017	0.103	0.354	0.158	0.095	0.212	0.124	0.143667	0.023	0.055	0	0.026	0.038	0	0	0.0126667	11.85	10.775	0.487179	0	0	0	0	0	0	0	0	0	0.062	0	0	0	0	0	0	0	0	0	#DIV/0!	#DIV/0!	227.353	107.786	138.589	Ssa02012146,DNA-directed RNA polymerases I and III subunit,RNA_pol_L_2
Ssa02011844	0.182	0	3.446	1.20933	21.555	18.42	2.886	14.287	1.165	1.361	1.139	1.22167	0.623	0.757	0.489	0.623	12.472	4.926	2.055	6.48433	11.8139	1.0102	10.4082	0.33	0	0	0.11	0	0	0	0	0.773	0.376	1.242	0.948	0.548	0	0.498667	2.271	1.774	2.716	2.25367	0	4.51939	0.105	4.141	0.594	Ssa10003764,Pentatricopeptide repeat-containing protein,"PPR,PPR_1,PPR_2,PPR_3"
Ssa08022469	7.701	6.583	6.317	6.867	80.393	102.021	60.459	80.9577	716.823	405.168	334.407	485.466	535.069	221.7	194.195	316.988	104.345	97.535	78.813	93.5643	11.7894	70.6955	0.295167	2.513	1.369	0.947	1.60967	67.551	89.104	50.503	69.0527	392.65	188.281	324.646	163.398	89.845	258.424	170.556	41.124	56.689	65.747	54.52	42.8987	0.319661	101.231	143.742	135.016	Ssa10002859,Belongs to the chaperonin (HSP60) family,Cpn60_TCP1
Ssa01002582	0	0	0.092	0.0306667	0.047	0.185	0.847	0.359667	0.256	0.285	0.125	0.222	0.487	0.185	0.526	0.399333	0.102	0.249	0.06	0.137	11.7283	7.23913	0.343072	0.679	0.781	0.674	0.711333	1.154	1.84	2.558	1.85067	0.51	0.884	3.77	2.895	2.093	0.358	1.782	6.835	5.555	9.269	7.21967	2.60169	4.05144	0	0	0	Ssa06018862,-,-
Ssa06018898	0	0	0.112	0.0373333	0.453	0.338	0.516	0.435667	0.937	0.139	0.255	0.443667	3.116	1.127	1.514	1.919	4.211	5.101	4.481	4.59767	11.6696	11.8839	2.39587	0.118	0	0	0.0393333	0	0	0	0	0	0.471	0.074	0.542	0.588	0.581	0.570333	0.677	3.382	1.153	1.73733	0	3.04617	79.266	74.674	77.15	Ssa07021752,Amino acid transporter,Aa_trans
Ssa01000035	0	0	0.059	0.0196667	0.15	0.06	0.477	0.229	0.055	0	0	0.0183333	0	0	0.123	0.041	0	0	0	0	11.6441	0.932203	0	0.062	0	0	0.0206667	0	0	0	0	0	0	0	0	0	0	0	0	0	0.032	0.0106667	0	#DIV/0!	34.89	42.045	46.991	Ssa07020980,Coenzyme Q-binding protein COQ10 homolog,Polyketide_cyc
Ssa08023716	0.086	0	0.074	0.0533333	1.414	0.443	0	0.619	0	0.091	0	0.0303333	0	0	0	0	0.325	0.159	0	0.161333	11.6062	0.56875	#DIV/0!	0	0	0	0	0	0.109	0	0.0363333	0.272	0.883	0	0.623	0.172	0.381	0.392	0	0	0	0	#DIV/0!	0	0.212	5.279	1.399	Ssa04015281,-,-
Ssa08023773	0.772	0.238	0.783	0.597667	2.134	9.349	9.298	6.927	13.817	6.033	8.053	9.301	9.741	6.355	6.453	7.51633	1.622	2.091	0.975	1.56267	11.5901	15.5622	0.207903	0.169	0.02	0	0.063	0	0.06	0	0.02	0.124	0.917	0.239	0.073	0.023	0.391	0.162333	0	0	0	0	0.31746	0	0	0	0	Ssa11006407,-,-
Ssa01001498	0	0	0.03	0.01	0	0	0.345	0.115	0	0.037	0.027	0.0213333	0	0.036	0.016	0.0173333	0.017	0	0.039	0.0186667	11.5	2.13333	1.07692	0	0	0	0	0	0	0	0	0	0	0	0	0	0.039	0.013	0	0	0	0	#DIV/0!	0	1.881	1.182	1.204	Ssa13008276,Pentatricopeptide repeat-containing protein,"PPR,PPR_2"
Ssa08023681	13.21	4.619	11.077	9.63533	145.999	148.009	32.666	108.891	53.49	13.747	39.791	35.676	85.198	16.312	27.809	43.1063	124.308	91.567	82.41	99.4283	11.3013	3.70262	2.30658	0	0.135	0	0.045	0.188	6.405	1.186	2.593	0.666	4.057	0.893	0	0.315	0	0.105	0.326	0.17	0	0.165333	57.6222	1.5746	65.651	53.061	38.553	Ssa12006682,4-hydroxy-3-methylbut-2-en-1-yl diphosphate synthase,GcpE
Ssa11005704	0.209	0	0.785	0.331333	0.454	2.321	8.391	3.722	4.585	0.807	1.243	2.21167	0.297	0.632	1.772	0.900333	0.149	0.024	0.029	0.0673333	11.2334	6.67505	0.0747871	0	0	0	0	0	0	0	0	0.028	0.027	0.03	0	0	0	0	0	0	0.049	0.0163333	#DIV/0!	#DIV/0!	3.332	1.636	1.401	Ssa02010239,-,-
Ssa04014562	0.022	0	0.093	0.0383333	0.057	0.865	0.366	0.429333	0.765	0.116	0.374	0.418333	0.025	0.12	0.486	0.210333	0	0.041	0	0.0136667	11.2	10.913	0.0649762	0	0.056	0.069	0.0416667	0.052	0.083	0.055	0.0633333	0.046	0.067	0.148	0.113	0.044	0.049	0.0686667	0.045	0.024	0.041	0.0366667	1.52	0.533981	11.023	9.749	8.27	Ssa06019729,Pre-mRNA-splicing factor,Suf
Ssa11005143	0	0	0.377	0.125667	3.239	0.492	0.477	1.40267	0.07	0.561	1.095	0.575333	0	0.03	0.078	0.036	0	0	0	0	11.1618	4.57825	0	0	0	0	0	0	0	0.055	0.0183333	0.046	0.045	0.249	0	0	0.049	0.0163333	0.182	0	0	0.0606667	#DIV/0!	3.71429	113.537	46.199	50.967	Ssa10003065,Peptide methionine sulfoxide reductase,SelR
Ssa10003491	0	0	0.051	0.017	0.052	0.103	0.413	0.189333	0	0.254	0.233	0.162333	0.068	0	0.053	0.0403333	0	0	0.134	0.0446667	11.1373	9.54902	1.10744	0	0	0	0	0	0	0	0	0	0	0	0.062	0.179	0.199	0.146667	0.062	0	0	0.0206667	#DIV/0!	0.140909	88.014	93.886	108.459	Ssa10003189,Belongs to the thiolase family,"Thiolase_C,Thiolase_N"
Ssa07019853	0.036	0	0	0.012	0	0	0.394	0.131333	0	1.971	0.821	0.930667	0	0	0	0	0	0	0	0	10.9444	77.5556	#DIV/0!	0.033	0.062	0	0.0316667	0	0	0	0	0.038	0.299	0.535	0.038	0	0	0.0126667	0.075	0	0.034	0.0363333	0	2.86842	2.252	1.048	1.026	Ssa05016281,-,-
Ssa01001494	0	0	0.03	0.01	0	0	0.327	0.109	0	0.037	0.027	0.0213333	0	0.024	0.016	0.0133333	0.017	0	0.039	0.0186667	10.9	2.13333	1.4	0	0	0	0	0	0	0	0	0	0	0	0	0	0.019	0.00633333	0	0	0	0	#DIV/0!	0	0.931	3.162	3.078	Ssa02010874,Chloride channel protein,"CBS,Voltage_CLC"
Ssa08023854	0.154	0.13	0.198	0.160667	1.271	1.827	2.131	1.743	0.184	0.943	0.511	0.546	0.175	0.08	0.275	0.176667	0.11	0.215	0.087	0.137333	10.8485	3.39834	0.777358	0.105	0.231	0	0.112	0	0	0	0	0.204	5.478	0	1.64	0	0.129	0.589667	0.479	7.069	0.143	2.56367	0	4.34765	0	0	0	Ssa09024184,AT-hook motif nuclear-localized protein,DUF296
Ssa06019358	0.764	0.216	0.985	0.655	10.355	6.917	4.017	7.09633	0.305	0.187	0.286	0.259333	0.236	0.033	0.014	0.0943333	0.166	0.43	0.162	0.252667	10.8341	0.395929	2.67845	0.072	0.014	0	0.0286667	0.019	0.061	0	0.0266667	0	0.033	0.054	0.017	0	0.018	0.0116667	0.017	0	0.015	0.0106667	0.930233	0.914286	2.374	2.62	2.67	Ssa04014572,Core-2/I-Branching enzyme,Branch
Ssa11004932	0.169	1.222	15.803	5.73133	9.731	13.228	162.643	61.8673	37.696	405.458	460.766	301.307	2.771	93.546	93.574	63.297	6.394	1.89	2.096	3.46	10.7946	52.5718	0.0546629	32.339	19.121	0.355	17.2717	3.929	0.258	0.425	1.53733	21.497	87.591	44.479	0	0.542	11.493	4.01167	2.668	2.632	4.848	3.38267	0.089009	0.843207	166.274	151.319	175.1	Ssa05017410,Belongs to the protein kinase superfamily,Pkinase_Tyr
Ssa12006622	0.057	0.195	0.247	0.166333	2.846	1.339	1.193	1.79267	0.367	0.306	0.583	0.418667	0.654	0.477	0.564	0.565	3.111	2.569	0.453	2.04433	10.7776	2.51703	3.61829	0.052	0	0	0.0173333	0	0.073	0.144	0.0723333	0.122	0.296	0.065	0.179	0.173	1.6	0.650667	0.358	0.124	0.321	0.267667	4.17308	0.411373	13.585	10.387	9.735	Ssa02010369,Protein of unknown function (DUF2854),DUF2854
Ssa06018619	1.246	0.704	1.657	1.20233	12.819	15.244	10.801	12.9547	1.658	3.669	9.755	5.02733	0.709	0.718	0.875	0.767333	70.279	40.635	20.164	43.6927	10.7746	4.18131	56.9409	0.484	0.458	0.592	0.511333	3.66	3.777	3.096	3.511	5.281	4.225	1.618	2.005	1.903	1.521	1.80967	0.092	0.16	0.331	0.194333	6.86636	0.107386	10.543	12.189	14.148	Ssa11006029,K homology RNA-binding domain,KH_1
Ssa07020249	0	0	0.367	0.122333	0	0.205	3.741	1.31533	0.986	0.337	0.272	0.531667	0	0.109	0.085	0.0646667	0	0	0	0	10.752	4.34605	0	0	0	0	0	0	0	0	0	0	0	0	0	0	0	0	0	0	0	0	#DIV/0!	#DIV/0!	0.211	0.741	0.423	Ssa02011408,Organic cation carnitine transporter,"MFS_1,Sugar_tr"
Ssa02011222	25.605	43.234	12.194	27.011	321.485	280.356	260.888	287.576	42.872	338.968	318.817	233.552	99.203	456.167	615.515	390.295	98.757	102.989	76.369	92.705	10.6466	8.64656	0.237525	39.319	75.373	84.862	66.518	773.162	454.832	366.152	531.382	574.194	573.791	175.313	334.436	359.459	244.784	312.893	252.334	224.099	285.615	254.016	7.98854	0.81183	4.036	34.53	17.6	Ssa09025396,EIN3-binding F-box protein,"F-box,F-box-like,LRR_6"
Ssa07021093	4.194	10.436	2.28	5.63667	64.735	56.748	57.846	59.7763	204.042	629.871	497.308	443.74	207.701	406.147	233.325	282.391	47.749	37.207	29.796	38.2507	10.6049	78.7239	0.135453	6.111	5.987	7.633	6.577	22.051	21.226	24.92	22.7323	1075.99	545.261	161.454	319.474	192.595	398.187	303.419	87.269	127.476	271.984	162.243	3.45634	0.534717	1.221	8.444	5.053	Ssa01001568,Receptor-like cytosolic serine threonine-protein kinase,"Pkinase,Pkinase_Tyr"
Ssa08022387	25.57	43.215	12.531	27.1053	320.333	280.737	261.063	287.378	42.536	337.969	318.767	233.091	99.647	458.777	609.163	389.196	98.171	102.273	75.937	92.127	10.6023	8.59944	0.236711	40.822	75.83	84.963	67.205	772.296	456.221	360.191	529.569	571.391	570.989	173.179	331.545	357.224	241.348	310.039	252.155	221.707	283.935	252.599	7.87991	0.814733	30.433	16.804	24.624	Ssa07021811,Proline transporter,Aa_trans
Ssa09024934	1.528	1.328	16.564	6.47333	58.974	113.301	32.215	68.1633	0.188	3.259	5.968	3.13833	1.472	0.081	0.315	0.622667	409.52	186.214	62.012	219.249	10.5299	0.484809	352.112	0.213	0.303	0.617	0.377667	0.141	0.449	0.443	0.344333	0.374	2.426	2.537	5.379	0.354	0.393	2.042	0.488	1.398	0.219	0.701667	0.911739	0.343617	0	0	0	Ssa07020477,Belongs to the terpene cyclase mutase family,"SQHop_cyclase_C,SQHop_cyclase_N"
Ssa10003586	0	0	0.109	0.0363333	0.275	0.465	0.407	0.382333	0.708	0.034	0.148	0.296667	0.325	0.066	0.085	0.158667	0.241	0.059	0	0.1	10.5229	8.16514	0.630252	0	0	0	0	0	0	0	0	0.101	0	0	0	0	0	0	0	0.034	0	0.0113333	#DIV/0!	#DIV/0!	21.773	43.678	43.071	Ssa10004833,Belongs to the ClpA ClpB family,"AAA,AAA_2,ClpB_D2-small,Clp_N"
Ssa06017711	0.179	0.126	0.269	0.191333	1.382	2.416	2.236	2.01133	1.573	0.43	0.559	0.854	0.127	0.356	1.08	0.521	0.808	0.584	0.126	0.506	10.5122	4.46341	0.971209	0.182	0.115	0.141	0.146	0.08	0.171	0.225	0.158667	0.095	0.069	0.025	0.163	0.067	0.1	0.11	0.627	0.581	1.855	1.021	1.08676	9.28182	6.489	9.416	4.381	Ssa06019216,Serine threonine-protein kinase,ABC1
Ssa07021331	0	0	0.018	0.006	0	0.019	0.17	0.063	0	0	0.067	0.0223333	0	0.015	0	0.005	0	0	0	0	10.5	3.72222	0	0.351	0.111	0.158	0.206667	0.155	0.082	0.027	0.088	0.068	0.022	0	0.045	0.065	0.024	0.0446667	0.022	0.07	0	0.0306667	0.425806	0.686567	72.713	82.869	114.035	Ssa10004777,transcription factor,HLH
Ssa01002562	0	0.029	0.022	0.017	0.09	0.135	0.309	0.178	0.249	0.083	0.304	0.212	0.03	0.054	0	0.028	0.173	0	0.059	0.0773333	10.4706	12.4706	2.7619	0	0	0	0	0	0	0	0	0	0.027	0	0	0	0	0	0.027	0.028	0	0.0183333	#DIV/0!	#DIV/0!	14.297	16.114	17.499	Ssa07020997,Long chain base biosynthesis protein,Aminotran_1_2
Ssa11005489	0.166	0.187	0	0.117667	0	0.572	3.111	1.22767	2.379	0.353	1.551	1.42767	1.507	0.801	1.183	1.16367	0.944	0	0	0.314667	10.4334	12.1331	0.27041	0	0	0	0	0	0	0	0	0.175	0	0	0	0	0	0	0	0	0	0	#DIV/0!	#DIV/0!	15.304	36.012	23.268	Ssa06017901,Belongs to the protein kinase superfamily,Pkinase
Ssa04015034	0.049	0.028	0	0.0256667	0.021	0	0.779	0.266667	0	41.286	3.019	14.7683	0.028	0.068	0.022	0.0393333	0.023	0.115	1.859	0.665667	10.3896	575.39	16.9237	0.111	0.106	0.336	0.184333	0.177	0	0	0.059	0.261	3.023	0.112	0	0	0.165	0.055	3.45	0.186	0.619	1.41833	0.320072	25.7879	0.343	0.69	0.579	Ssa04014614,Belongs to the helicase family. Dicer subfamily,"DEAD,Dicer_dimer,Helicase_C,PAZ,ResIII,Ribonuclease_3,dsrm"
Ssa03012812	0	0	0.146	0.0486667	0.296	0.881	0.336	0.504333	0.271	0.362	0.664	0.432333	0	0	0	0	0.969	0.475	0	0.481333	10.363	8.88356	#DIV/0!	0	0	0	0	0	0	0	0	0	0.175	0	0	0	0	0	0	0	0	0	#DIV/0!	#DIV/0!	10.681	15.688	13.824	Ssa12007139,disulfide-isomerase,"COPIIcoated_ERV,ERGIC_N,Thioredoxin"
Ssa06017579	0	0	0.018	0.006	0	0	0.185	0.0616667	0	0	0.032	0.0106667	0	0.676	0.019	0.231667	0	0	0	0	10.2778	1.77778	0	0	0	0	0	0	0.053	0	0.0176667	0	0.086	0.024	0.022	0.021	0.07	0.0376667	0.022	0.112	0	0.0446667	#DIV/0!	1.18584	1.441	0.671	2.188	Ssa09024906,LOB domain-containing protein,LOB
Ssa07021775	0.029	0	0.198	0.0756667	0.878	0.424	1.027	0.776333	2.35	0.369	1.104	1.27433	1.117	2.255	2.036	1.80267	0.11	0.511	0.098	0.239667	10.2599	16.8414	0.132951	0.157	0.248	0.363	0.256	0.311	0.331	0.145	0.262333	0.214	0.089	0.229	0.57	0.116	0.772	0.486	0.03	0	0	0.01	1.02474	0.0205761	17.776	15.659	13.066	Ssa07021247,-,-
Ssa09024615	0	0	0.129	0.043	0.131	0.519	0.669	0.439667	0.18	0.48	0.44	0.366667	0.085	0.182	0.268	0.178333	0.143	0.105	0.042	0.0966667	10.2248	8.52713	0.542056	0.034	0	0	0.0113333	0	0.048	0	0.016	0.159	0.194	0	0.039	0.075	0	0.038	0	0.081	0	0.027	1.41176	0.710526	29.346	37.153	24.461	Ssa07021615,VQ motif,VQ
Ssa11006214	0	0	0.109	0.0363333	0.22	0.3	0.594	0.371333	0.353	0.337	0.494	0.394667	0.144	0.328	0.649	0.373667	0	0.029	0	0.00966667	10.2202	10.8624	0.0258698	0	0	0	0	0.038	0	0	0.0126667	0.268	0.065	0.431	0.296	0.063	0.035	0.131333	0.23	0.102	0.177	0.169667	#DIV/0!	1.29188	0.042	0	0.038	Ssa03013476,Belongs to the UDP-glycosyltransferase family,UDPGT
Ssa02011768	0.141	0.22	0.152	0.171	0.937	1.938	2.359	1.74467	1.354	1.921	2.07	1.78167	0.704	1.259	1.894	1.28567	0.638	0.379	0.299	0.438667	10.2027	10.4191	0.341198	0.384	0.409	0.13	0.307667	0.529	0.247	0.2	0.325333	1.067	1.021	1.184	1.929	1.505	1.24	1.558	0.587	0.573	0.493	0.551	1.05742	0.353659	2.147	1.194	1.541	Ssa02011842,-,-
Ssa05016545	0.082	0	0.303	0.128333	0	0.188	3.709	1.299	7.16	0.116	0.424	2.56667	0	0.019	0.024	0.0143333	0	0	0	0	10.1221	20	0	0	0	0	0	0	0	0.239	0.0796667	0	0.112	0.864	0.141	0.054	0	0.065	0	0	0	0	#DIV/0!	0	0.68	2.116	1.487	Ssa07020545,UAA transporter family,TPT
Ssa06019307	0.21	0.119	0.933	0.420667	6.458	1.634	4.68	4.25733	22.664	0.56	1.423	8.21567	0.877	0.751	16.557	6.06167	0.3	4.669	4.858	3.27567	10.1204	19.5301	0.54039	0.698	0.451	0.552	0.567	12.129	13.917	64.545	30.197	39.206	27.265	27.105	31.228	23.639	37.914	30.927	2.765	2.424	4.861	3.35	53.2575	0.10832	18.346	11.045	13.525	Ssa03013996,-,HMA
Ssa06018078	0	0	0.027	0.009	0	0.027	0.246	0.091	0.199	0.033	0.049	0.0936667	0	0	0.056	0.0186667	0.03	0	0.035	0.0216667	10.1111	10.4074	1.16071	0	0	0	0	0	0	0	0	0	0	0	0	0	0	0	0	0	0	0	#DIV/0!	#DIV/0!	67.763	49.166	49.625	Ssa04014979,Belongs to the thiolase family,"Gp_dh_C,Thiolase_C,Thiolase_N"
Ssa01000364	0.022	0.025	0.094	0.047	0.038	0.132	1.255	0.475	0	0.117	0.308	0.141667	0	0.106	0.137	0.081	0.021	0	0	0.007	10.1064	3.01418	0.0864198	0.198	0.188	0.161	0.182333	0.052	0	0	0.0173333	0	0.09	0.099	0.205	0.132	0.244	0.193667	0.068	0.071	0.102	0.0803333	0.095064	0.414802	20.151	33.809	42.648	Ssa08023396,WAT1-related protein,EamA
Ssa09025729	2.224	0.925	0.754	1.301	13.581	21.827	3.994	13.134	2.149	31.752	31.714	21.8717	0.799	0.081	0.679	0.519667	16.734	8.995	4.55	10.093	10.0953	16.8114	19.4221	0	0	0	0	0	0.149	0	0.0496667	1.736	7.668	0.665	0	0.117	0.13	0.0823333	1.579	0	0	0.526333	#DIV/0!	6.39271	0.389	0.103	0.158	Ssa13008560,Sulfite exporter TauE/SafE,TauE
Ssa11005007	0.187	0.053	0.642	0.294	0.467	2.701	5.656	2.94133	2.684	3.135	5.341	3.72	0.691	0.646	1.522	0.953	2.838	0.304	0.132	1.09133	10.0045	12.6531	1.14516	0.211	0.14	0	0.117	0	0	0	0	0.074	1.445	0.053	0.097	0.117	0.078	0.0973333	0.121	0.025	0.043	0.063	0	0.64726	44.725	15.06	21.858	Ssa04014499,Belongs to the GST superfamily,"GST_C,GST_N,GST_N_3"
Ssa12007092	0.175	0.197	0.225	0.199	1.215	3.546	1.21	1.99033	0.558	0.186	0.682	0.475333	0.199	0.06	0.078	0.112333	0.996	0	0	0.332	10.0017	2.38861	2.95549	0	0	0	0	0	0	0	0	0	0	0	0	0	0	0	0	0	0	0	#DIV/0!	#DIV/0!	0.429	0.684	0.391	Ssa09025870,radialis-like,Myb_DNA-binding
Ssa09025897	4.467	1.121	2.253	2.61367	28.227	34.752	15.288	26.089	24.305	21.642	21.059	22.3353	15.709	28.583	25.16	23.1507	8.218	8.058	4.208	6.828	9.98176	8.54559	0.294938	0.086	0.041	0	0.0423333	0.142	0.391	0.089	0.207333	0.05	0.683	0.456	0.295	0.024	0.132	0.150333	0.196	0.102	0.088	0.128667	4.89764	0.855876	973.974	811.152	789.673	Ssa02011326,-,-
Ssa01001485	3.658	4.681	1.251	3.19667	29.531	40.035	25.959	31.8417	64.98	113.146	56.763	78.2963	29.7	21.504	28.607	26.6037	6.384	4.73	1.851	4.32167	9.9609	24.4931	0.162446	0.203	0.352	0.274	0.276333	15.022	13.828	14.878	14.576	341.121	94.531	44.435	25.348	8.082	66.968	33.466	3.216	3.873	12.962	6.68367	52.7479	0.199715	0.438	0.437	0.199	Ssa01001001,"Dirigent proteins impart stereoselectivity on the phenoxy radical-coupling reaction, yielding optically active lignans from two molecules of coniferyl alcohol in the biosynthesis of lignans, flavonolignans, and alkaloids and thus plays a central role in plant secondary metabolism",Dirigent
Ssa11005451	0	0	0.161	0.0536667	0.285	0.485	0.833	0.534333	0.075	0.349	0.292	0.238667	0.053	0.356	0.459	0.289333	0.133	0	0	0.0443333	9.95652	4.4472	0.153226	0.042	0	0	0.014	0	0	0	0	0	0.097	0	0.097	0.047	0.052	0.0653333	0	0	0.044	0.0146667	0	0.22449	5.686	17.161	11.128	Ssa10004176,Vinorine synthase-like,Transferase
Ssa13008768	0.019	0.065	0.05	0.0446667	0.101	0.384	0.841	0.442	0.093	0.288	0.347	0.242667	0.066	0.2	0.483	0.249667	0.037	0.144	0	0.0603333	9.89552	5.43284	0.241656	0.087	0.033	0.061	0.0603333	0	0	0.097	0.0323333	0.041	0.06	0.066	0.08	0.213	0.022	0.105	0.12	0.021	0.162	0.101	0.535912	0.961905	8.756	14.127	11.14	Ssa10004593,UFM1-specific,Peptidase_C78
Ssa01000914	0	0	0.043	0.0143333	0.043	0.086	0.296	0.141667	0.159	0.213	0.195	0.189	0	0	0.045	0.015	0.047	0.047	0.056	0.05	9.88372	13.186	3.33333	0.136	0.128	0.052	0.105333	0.12	0.064	0	0.0613333	0.053	1.958	0.227	0.052	0.1	0.111	0.0876667	0.052	0.054	0.139	0.0816667	0.582278	0.931559	0	0	0	Ssa02010245,ubiquitin-conjugating enzyme,UQ_con
Ssa10003959	1.662	1.104	2.044	1.60333	12.75	16.295	18.312	15.7857	49.445	67.685	40.598	52.576	29.603	33.244	21.366	28.071	3.964	6.346	5.106	5.13867	9.84553	32.7917	0.18306	0.708	1.146	0.718	0.857333	10.07	10.122	10.08	10.0907	62.084	35.178	43.014	29.925	22.41	47.355	33.23	7.139	6.094	11.347	8.19333	11.7698	0.246564	0	0.068	0.078	Ssa02010617,transcription factor,HLH
Ssa10003391	6.6	2.213	10.187	6.33333	60.239	76.932	48.757	61.976	23.384	26.384	27.783	25.8503	30.281	30.307	37.116	32.568	43.99	34.777	18.478	32.415	9.78568	4.08163	0.995302	0	0	0	0	0	0.263	0	0.0876667	0.655	0.319	0.82	0.107	0.103	0	0.07	0.856	0.557	0.384	0.599	#DIV/0!	8.55714	10.752	28.927	22.87	Ssa02009496,NAC domain-containing protein,NAM
Ssa04015658	0.262	0.404	0.327	0.331	3.687	3.95	2.074	3.237	2.245	0.838	1.005	1.36267	2.305	3.114	2.809	2.74267	1.381	1.11	0.618	1.03633	9.77946	4.11682	0.377856	0.065	0.082	0.025	0.0573333	0.2	0.121	0.09	0.137	0.05	0.172	0.325	0.471	0.239	0.159	0.289667	0.223	0.206	0.155	0.194667	2.38953	0.672037	52.638	103.806	52.936	Ssa02009976,Proline-rich nuclear receptor coactivator motif,PNRC
Ssa07021107	14.677	32.632	7.555	18.288	147.335	218.368	169.436	178.38	2937.73	1957.08	1356.47	2083.76	450.918	340.7	273.517	355.045	54.728	60.448	29.341	48.1723	9.75392	113.942	0.13568	0.633	0.8	0.611	0.681333	136.995	143.378	132.393	137.589	2860.49	901.02	718.203	124.395	55.81	647.665	275.957	29.203	39.974	74.064	47.747	201.94	0.173024	150.205	82.718	87.105	Ssa03012524,Casein kinase II subunit,Pkinase
Ssa06018107	0.338	0.668	1.233	0.746333	1.908	3.135	16.787	7.27667	232.454	40.686	62.246	111.795	57.949	52.374	13.649	41.324	10.83	13.451	18.745	14.342	9.74989	149.793	0.347062	0.688	0.58	0	0.422667	6.37	7.093	1.911	5.12467	6.798	9.758	2.11	9.306	7.278	26.624	14.4027	2.629	4.654	4.009	3.764	12.1246	0.26134	2.809	12.918	8.033	Ssa01002768,Belongs to the peptidase C19 family,"MATH,UCH,USP7_C2,USP7_ICP0_bdg"
Ssa09024688	0.353	0	3.08	1.14433	0.818	1.675	30.82	11.1043	79.704	5.766	2.755	29.4083	5.888	4.025	4.83	4.91433	4.636	3.615	0.663	2.97133	9.70376	25.6991	0.604626	0	0	0	0	0	0	0	0	0	0.061	0	0	0.059	0	0.0196667	0	0	0	0	#DIV/0!	0	4.849	3.983	5.502	Ssa02011995,magnesium transporter MRS2-11,CorA
Ssa11006395	1.17	0.189	3.106	1.48833	3.379	11.765	27.7	14.2813	5.673	4.99	3.77	4.811	0.809	0.621	1.419	0.949667	1.35	0.389	0.094	0.611	9.59552	3.23247	0.643384	0.132	0.018	0.132	0.094	0.05	0.133	0	0.061	0.155	0.927	0.214	0.065	0.063	0	0.0426667	0.022	0.023	0.039	0.028	0.648936	0.65625	0.808	6.055	4.664	Ssa02011475,2-oxoglutarate (2OG) and Fe(II)-dependent oxygenase superfamily protein,-
Ssa06018241	0.175	0.197	0.15	0.174	1.519	1.207	2.247	1.65767	2.79	0.559	0.819	1.38933	0.199	0.604	0.156	0.319667	0.498	0.488	0.197	0.394333	9.52682	7.98467	1.23358	0	0	0	0	0	0	0	0	0	0.361	0	0.363	0	0	0.121	0.363	0.189	0.163	0.238333	#DIV/0!	1.9697	69.181	15.071	111.225	Ssa12006968,Wound induced protein,DUF3774
Ssa10004429	4.825	1.849	2.961	3.21167	38.277	37.649	15.768	30.5647	88.204	50.341	50.538	63.0277	96.114	38.017	83.501	72.544	11.543	7.305	6.798	8.54867	9.51676	19.6246	0.117841	0.312	0.222	0.452	0.328667	8.772	10.31	8.992	9.358	40.077	23.474	25.739	21.862	21.333	24.003	22.3993	2.147	1.956	0.802	1.635	28.4726	0.0729932	8.766	6.809	9.838	Ssa06018652,Electron transfer flavoprotein subunit alpha,"ETF,ETF_alpha"
Ssa02011344	0.067	0.076	0.211	0.118	0.64	1.117	1.611	1.12267	0.891	0.642	0.697	0.743333	0.127	0.247	0.657	0.343667	0.848	0.416	0.151	0.471667	9.51412	6.29944	1.37245	0.242	0.096	0.047	0.128333	0.24	0.227	0.252	0.239667	1.276	1.128	0.38	0.974	0.537	0.323	0.611333	0.509	0.796	0.685	0.663333	1.86753	1.08506	0.296	0	0	Ssa13008401,Auxin-binding protein,Cupin_1
Ssa08022175	0.046	0.026	0.059	0.0436667	0.02	0.239	0.982	0.413667	0.295	0.172	0.234	0.233667	0.026	0.303	0.268	0.199	0.044	0.129	0.078	0.0836667	9.47328	5.35115	0.420436	0.084	0.079	0.073	0.0786667	0	0.059	0.058	0.039	0.024	0.191	0.079	0.072	0.046	0.026	0.048	0.048	0.05	0.043	0.047	0.495763	0.979167	0.19	0.189	0.216	Ssa09025489,Protein of unknown function (DUF3537),DUF3537
Ssa13008637	0.28	0.253	0.48	0.337667	2.284	2.655	4.646	3.195	178.58	20.923	26.505	75.336	27.174	15.041	5.244	15.8197	2.975	1.979	0.882	1.94533	9.46199	223.108	0.122969	0.051	0.192	0.235	0.159333	5.692	8.469	1.054	5.07167	29.915	4.904	4.445	2.384	4.652	22.615	9.88367	0.29	0.604	0.416	0.436667	31.8305	0.0441806	3.807	4.473	4.152	Ssa02011547,DNA-binding transcription factor activity,Laminin_G_3
Ssa10003231	0	0	0.039	0.013	0.04	0.079	0.249	0.122667	0	0.366	0.214	0.193333	0.026	0.063	0.061	0.05	0	0	0	0	9.4359	14.8718	0	0.062	0.098	0.048	0.0693333	0.027	0.058	0.144	0.0763333	0.145	0.071	0.13	0.095	0.023	0.025	0.0476667	0	0	0.021	0.007	1.10096	0.146853	13.332	26.61	25.653	Ssa05017018,GPI-anchored protein At1g61900-like,-
Ssa03013682	0.28	0.253	0.48	0.337667	2.284	2.655	4.591	3.17667	179.116	21.101	26.767	75.6613	27.174	15.118	5.194	15.8287	2.975	1.979	0.882	1.94533	9.4077	224.071	0.122899	0.051	0.192	0.293	0.178667	5.692	8.54	1.054	5.09533	30.093	4.096	4.509	2.384	4.596	22.553	9.84433	0.29	0.665	0.416	0.457	28.5187	0.0464226	0.927	0.555	0.141	Ssa12006630,Zinc finger protein CONSTANS-like,CCT
Ssa08022706	0.022	0	0	0.00733333	0.019	0.077	0.11	0.0686667	0	0.166	0.104	0.09	0	0.061	0.059	0.04	0.042	0.021	0	0.021	9.36364	12.2727	0.525	0.06	0.057	0.047	0.0546667	0	0.085	0	0.0283333	1.881	3.137	0	0.577	0.089	0	0.222	1.083	5.42	0.103	2.202	0.518293	9.91892	8.423	35.502	22.635	Ssa13009074,RPM1-interacting protein,AvrRpt-cleavage
Ssa08022267	0.067	0.076	0.211	0.118	0.601	1.098	1.589	1.096	0.926	0.642	0.714	0.760667	0.127	0.247	0.677	0.350333	0.848	0.416	0.151	0.471667	9.28814	6.44633	1.34634	0.242	0.096	0.047	0.128333	0.24	0.227	0.252	0.239667	1.276	1.128	0.38	0.951	0.492	0.323	0.588667	0.509	0.796	0.685	0.663333	1.86753	1.12684	0	0	0	Ssa02011000,-,-
Ssa02009558	56.537	0	248.912	101.816	1.054	163.633	2669.49	944.726	5094.33	594.77	660.723	2116.61	4.831	63.178	224.756	97.5883	13.825	2.083	0.214	5.374	9.27873	20.7885	0.0550681	0	0.033	0.08	0.0376667	0	0	0	0	0.04	4.497	0.043	0	0	0	0	0	0	0	0	0	#DIV/0!	257.567	125.521	140.412	Ssa12007629,Belongs to the universal ribosomal protein uL5 family,"Ribosomal_L5,Ribosomal_L5_C"
Ssa01002776	3.897	4.15	1.53	3.19233	43.842	39.126	5.286	29.418	7.645	20.059	7.912	11.872	58.037	18.323	13.424	29.928	3.385	9.128	20.326	10.9463	9.2152	3.71891	0.365756	9.88	3.152	5.842	6.29133	30	32.877	25.055	29.3107	123.259	91.216	28.704	46.538	39.615	1.24	29.131	1.156	3.008	1.451	1.87167	4.6589	0.06425	2.017	3.025	1.801	Ssa10004011,zinc finger CCCH domain-containing protein,"zf-CCCH,zf-CCCH_2,zf-CCCH_3"
Ssa03012603	0.285	0.058	12.341	4.228	0.608	21.458	94.458	38.8413	33.029	6.844	12.008	17.2937	0.177	1.557	19.721	7.15167	0.098	0.217	0	0.105	9.18669	4.09027	0.0146819	0	0	0	0	0	0	0	0	0	0.828	0	0	0	0	0	0	0.028	0	0.00933333	#DIV/0!	#DIV/0!	7.913	20.283	20.183	Ssa07020932,Exocyst complex component,"Sec3-PIP2_bind,Sec3_C"
Ssa05016222	0.057	0.064	0.121	0.0806667	0.27	1.221	0.727	0.739333	0.542	0.362	0.817	0.573667	0.129	0.137	0.151	0.139	0.725	0.395	0	0.373333	9.16529	7.11157	2.68585	0.026	0.049	0.089	0.0546667	0.135	0.072	0.249	0.152	0.12	0.554	0.578	0	0.057	0.221	0.0926667	0.117	0.122	0.105	0.114667	2.78049	1.23741	16.07	25.469	18.683	Ssa03013325,Transcription factor,Myb_DNA-binding
Ssa06019186	0	0	0.041	0.0136667	0	0.328	0.047	0.125	0	0	0.074	0.0246667	0	0	0	0	0	0	0.107	0.0356667	9.14634	1.80488	#DIV/0!	0.043	0.326	0	0.123	0	0	0	0	0	0.196	0	0	0	0	0	0.049	0	0	0.0163333	0	#DIV/0!	1.408	0.925	0.588	Ssa10002957,Belongs to the TRAFAC class myosin-kinesin ATPase superfamily. Kinesin family,Kinesin
Ssa12006789	0	0	0.022	0.00733333	0	0	0.201	0.067	2.754	4.435	4.417	3.86867	0.029	0.053	0.023	0.035	0.241	0.118	0.029	0.129333	9.13636	527.545	3.69524	0	0.413	0	0.137667	0	0	0	0	0.672	14.316	0.029	1.556	0.254	0	0.603333	0.421	0.905	0.024	0.45	0	0.745856	0.128	0.034	0	Ssa03012738,-,-
Ssa02011437	0.046	0.026	0.059	0.0436667	0.02	0.239	0.936	0.398333	0.295	0.172	0.234	0.233667	0.026	0.303	0.268	0.199	0.044	0.129	0.052	0.075	9.12214	5.35115	0.376884	0.084	0.079	0.073	0.0786667	0	0.059	0.058	0.039	0.024	0.191	0.079	0.072	0.046	0.026	0.048	0.048	0.05	0.043	0.047	0.495763	0.979167	19.747	33.449	20.205	Ssa02011796,Belongs to the peroxisomal membrane protein PXMP2 4 family,Mpv17_PMP22
Ssa09025025	14.868	18.702	17.73	17.1	149.415	167.649	150.892	155.985	2743.06	693.007	582.305	1339.46	1037.54	317.71	150.35	501.868	114.974	118.931	124.902	119.602	9.12195	78.3308	0.238314	2.269	2.897	1.086	2.084	196.063	300.856	87.369	194.763	668.903	177.809	506.906	1124.78	2472.88	1774.59	1790.75	40.31	84.587	104.49	76.4623	93.4562	0.0426985	9.539	6.949	6.235	Ssa11005290,"NADH dehydrogenase (ubiquinone) complex I, assembly factor",SQS_PSY
Ssa01001700	0.048	0	0.062	0.0366667	0.4	0.48	0.12	0.333333	0.27	0.155	0.359	0.261333	0.523	0.519	0.994	0.678667	0.621	0.496	0.164	0.427	9.09091	7.12727	0.629175	0.11	0.104	0.152	0.122	0.348	0.585	0.821	0.584667	0.179	0.474	0.797	1.685	0.776	0.081	0.847333	0.226	0.418	0.631	0.425	4.79235	0.501574	19.316	18.732	20.543	Ssa08023692,GTP-BINDING protein,"Ras,Roc"
Ssa13008398	0	0	0.062	0.0206667	0.219	0.093	0.249	0.187	0.574	0.728	0.477	0.593	0.245	0.398	0.128	0.257	0.102	0.067	0	0.0563333	9.04839	28.6935	0.219196	0.098	0.031	0	0.043	0.043	0.137	0.09	0.09	0.343	0.223	0.163	0	0.216	0.32	0.178667	0.075	0.194	0	0.0896667	2.09302	0.501866	2.015	1.608	1.443	Ssa09025219,Ocs element-binding factor 1-like,"bZIP_1,bZIP_2"
Ssa06018377	2.002	1.65	2.231	1.961	22.202	18.479	12.524	17.735	2.765	8.566	4.353	5.228	4.496	4.06	2.803	3.78633	2.442	3.756	1.311	2.503	9.04386	2.66599	0.661062	0.147	0.023	0	0.0566667	0	0.964	0.034	0.332667	0	1.535	0.061	0.45	0.027	0.09	0.189	0.14	0.058	0.05	0.0826667	5.87059	0.43739	18.171	13.315	16.557	Ssa11006198,"Ferredoxin-thioredoxin reductase, variable",FeThRed_A
Ssa08023474	1.612	1.781	1.656	1.683	12.185	27.99	5.407	15.194	5.148	10.386	12.534	9.356	5.624	2.302	3.38	3.76867	59.597	58.668	95.06	71.1083	9.02793	5.55912	18.8683	0.095	0.812	0.147	0.351333	0.084	0.089	0.132	0.101667	4.641	15.441	0.716	2.186	0.281	0.234	0.900333	154.206	141.012	64.005	119.741	0.289374	132.996	69.169	136.724	131.239	Ssa02009775,Peptidoglycan-binding LysM domain-containing protein,LysM
Ssa06019513	0	0.073	0.39	0.154333	0	0	4.169	1.38967	0	0	0	0	0	0.09	0.058	0.0493333	0	0	0.073	0.0243333	9.00432	0	0.493243	0	0	0	0	0	0	0	0	0	0	0	0	0	0	0	0	0.07	0	0.0233333	#DIV/0!	#DIV/0!	112.543	71.222	85.584	Ssa05017232,4-hydroxy-3-methylbut-2-enyl diphosphate reductase,LYTB
Ssa07020644	0	0	0.06	0.02	0.03	0.06	0.447	0.179	0	0.037	0	0.0123333	0	0	0.031	0.0103333	0	0	0	0	8.95	0.616667	0	2.549	0.567	0	1.03867	0	0.133	0	0.0443333	0	0.072	0.987	0.072	0	0	0.024	0.072	0.225	0.097	0.131333	0.0426829	5.47222	79.993	24.363	31.841	Ssa08023127,-,-
Ssa05015876	0	0.076	0	0.0253333	0	0.347	0.331	0.226	0	0.785	0	0.261667	0.228	0.278	0.837	0.447667	0	0	0	0	8.92105	10.3289	0	0	0	0	0	0	0.085	0.337	0.140667	0.851	1.243	0.532	0.557	1.543	1.193	1.09767	0	0	0	0	#DIV/0!	0	11.412	9.985	12.119	Ssa06017552,f-box protein,"F-box,F-box-like,LysM"
Ssa03012504	0.036	0	0	0.012	0.063	0.187	0.071	0.107	0.058	0.038	0.084	0.06	0.697	0.249	0.451	0.465667	0.103	0.134	0	0.079	8.91667	5	0.169649	0.033	0	0	0.011	0.345	0.092	0.68	0.372333	3.284	2.381	2.62	7.084	5.564	2.571	5.073	1.796	0.857	1.376	1.343	33.8485	0.264735	11.069	13.723	12.785	Ssa04014630,GPI transamidase component,PIG-S
Ssa04014343	0	0	0.102	0.034	0.052	0.179	0.675	0.302	0.047	0.095	0.116	0.086	0	0.021	0.027	0.016	0.197	0.028	0	0.075	8.88235	2.52941	4.6875	0	0	0	0	0.036	0.076	0	0.0373333	0.031	0.061	0.202	0	0	0.033	0.011	0.031	0.032	0.083	0.0486667	#DIV/0!	4.42424	8.974	9.873	2.946	Ssa06018082,Belongs to the iron ascorbate-dependent oxidoreductase family,"2OG-FeII_Oxy,DIOX_N"
Ssa03012578	0.084	0.031	0.502	0.205667	0.121	0.529	4.818	1.82267	4.267	0.742	1.478	2.16233	0.57	1.559	2.461	1.53	0.397	0.104	0.125	0.208667	8.86224	10.5138	0.136383	0	0	0.058	0.0193333	0.1	0	0	0.0333333	0.147	0.057	0	0.376	0.028	0.155	0.186333	0.202	0	0.026	0.076	1.72414	0.407871	0.043	0	0	Ssa08022461,Protein ZINC INDUCED,MFS_1
Ssa10002947	60.054	47.832	57.799	55.2283	482.071	659.998	317.477	486.515	122.012	211.647	154.22	162.626	48.595	39.194	92.356	60.0483	103.909	37.53	15.611	52.35	8.80916	2.94462	0.871798	1.389	2.971	1.058	1.806	3.517	9.039	3.968	5.508	66.735	67.893	86.18	20.876	6.634	31.356	19.622	25.118	2.89	2.612	10.2067	3.04983	0.520164	65.238	16.683	25.148	Ssa02011197,NADPH quinone,FMN_red
Ssa01000407	0	0	0.092	0.0306667	0	0.276	0.527	0.267667	0.17	0.114	0.25	0.178	0.364	0.074	0.095	0.177667	0.203	0.298	0.12	0.207	8.72826	5.80435	1.1651	0.097	0	0	0.0323333	0.255	0	0	0.085	0	0.11	0	0.222	0	0.238	0.153333	0.111	0.23	0	0.113667	2.62887	0.741304	10.035	23.85	12.465	Ssa02009943,Sucrose nonfermenting 4-like,"AMPK1_CBM,CBS"
Ssa07020102	0.195	0	0.084	0.093	0.254	0.926	1.254	0.811333	0	0.416	1.066	0.494	0	1.821	1.307	1.04267	0.185	0.091	0.11	0.128667	8.72401	5.31183	0.123402	0.088	0.084	0.307	0.159667	0	0	0	0	1.55	0.604	0	1.115	0.489	0.217	0.607	0.304	0.632	0.545	0.493667	0	0.813289	9.368	1.899	3.691	Ssa12007631,Belongs to the small heat shock protein (HSP20) family,HSP20
Ssa02009732	0.119	0.045	0	0.0546667	0.172	1.062	0.196	0.476667	1.711	1.523	1.488	1.574	2.168	1.4	5.069	2.879	6.297	1.553	0.85	2.9	8.71951	28.7927	1.00729	0	0	0	0	0	0.101	0.1	0.067	0.463	0.287	0.135	0	0.278	0.663	0.313667	0.041	0	0.037	0.026	#DIV/0!	0.0828905	41.062	28.458	23.549	Ssa04014968,-,-
Ssa08023236	2.225	1.126	3.097	2.14933	21.072	23.78	10.851	18.5677	12.863	18.319	15.636	15.606	13.009	4.509	8.153	8.557	6.487	5.932	2.68	5.033	8.6388	7.26086	0.588173	0.417	0.197	0.483	0.365667	0.459	1.172	1.543	1.058	9.346	11.478	17.077	2.632	1.845	1.282	1.91967	14.015	2.736	1.642	6.131	2.89335	3.19378	138.612	337.145	703.357	Ssa02009554,-,-
Ssa10004706	1.35	0.464	2.571	1.46167	13.368	18.043	6.329	12.58	6.186	19.586	23.378	16.3833	2.205	2.029	2.359	2.19767	18.459	10.499	7.012	11.99	8.60661	11.2087	5.45579	1.276	0.957	0.493	0.908667	0.211	1.27	0.59	0.690333	3.234	14.657	5.667	1.648	1	1.831	1.493	3.473	2.855	2.186	2.838	0.759721	1.90087	9.006	15.845	18.185	Ssa13008037,Methyltransferase,Methyltransf_29
Ssa03014049	0.071	0.04	0.674	0.261667	0.744	1.877	4.089	2.23667	2.732	0.836	1.642	1.73667	0.365	0.887	1.146	0.799333	0.406	0.232	0.201	0.279667	8.54777	6.63694	0.349875	1.097	0.703	1.234	1.01133	1.152	0.771	0.627	0.85	1.17	0.441	1.174	0.778	1.143	0.715	0.878667	1.591	1.387	1.46	1.47933	0.840475	1.68361	3.543	2.014	4.599	Ssa06018438,Plant protein of unknown function,DUF247
Ssa07019848	0.08	0.18	0	0.0866667	0.761	0.825	0.63	0.738667	0.509	0.17	0.684	0.454333	0.634	0.991	0.853	0.826	0.303	0.445	0.538	0.428667	8.52308	5.24231	0.518967	0	0	0	0	0	0	0	0	0	0.164	0.271	0	0	0.089	0.0296667	0.165	0	0	0.055	#DIV/0!	1.85393	13.804	12.022	9.602	Ssa08023726,acyl-coenzyme A oxidase,"ACOX,Acyl-CoA_dh_1,Acyl-CoA_dh_M"
Ssa10002961	0	0	0.09	0.03	0.136	0.27	0.361	0.255667	0.083	0.111	0.082	0.092	0.119	0.036	0.093	0.0826667	0.099	0.146	0.059	0.101333	8.52222	3.06667	1.22581	0	0	0	0	0	0	0	0	0	0	0	0	0	0	0	0	0	0	0	#DIV/0!	#DIV/0!	5.612	3.525	9.356	Ssa10003885,Calcineurin subunit,EF-hand_7
Ssa06017652	0.146	0	0.628	0.258	2.035	3.979	0.579	2.19767	1.051	0.234	0.685	0.656667	1.915	0.354	0.196	0.821667	1.807	1.431	0.989	1.409	8.51809	2.54522	1.71481	0.066	0	0.077	0.0476667	0	0	0.092	0.0306667	0	0.302	0	0	0	0	0	0	0	0	0	0.643357	#DIV/0!	0.109	0.044	0.249	Ssa01001492,ankyrin repeat-containing protein,"Ank_2,PGG"
Ssa08023885	0.234	0.088	0.201	0.174333	1.223	1.215	2.01	1.48267	1.872	1.25	2.197	1.773	0.712	1.081	1.117	0.97	2.004	1.019	0.176	1.06633	8.50478	10.1702	1.09931	0.142	0.134	0.164	0.146667	0.749	0.796	0.393	0.646	0.745	0.887	0.887	1.381	0.47	1.393	1.08133	1.541	1.52	1.237	1.43267	4.40455	1.32491	385.291	635.53	344.343	Ssa05017362,Senescence-associated protein,Senescence
Ssa01001846	0	0.03	0.023	0.0176667	0.069	0.068	0.313	0.15	0.042	0.225	0.371	0.212667	0	0.055	0.118	0.0576667	0.05	0.025	0	0.025	8.49057	12.0377	0.433526	0	0.045	0	0.015	0	0	0	0	0.028	0.327	0.21	0.082	0.106	0.353	0.180333	0	0.114	0.074	0.0626667	0	0.347505	12.541	6.355	11.349	Ssa02011622,E3 SUMO-protein ligase,zf-Nse
Ssa01001811	0.262	0	0.09	0.117333	0.501	1.539	0.933	0.991	0.753	1.509	1.556	1.27267	0.239	0.471	1.03	0.58	0.199	0.195	0	0.131333	8.44602	10.8466	0.226437	0	0	0	0	0	0	0	0	0	0.162	0	0	0	0	0	0	0	0	0	#DIV/0!	#DIV/0!	0.464	1.034	0.52	Ssa07021307,DNA polymerase,"DEAD,DNA_pol_A,Helicase_C"
Ssa05017263	0.269	0.048	0.389	0.235333	0.96	2.236	2.758	1.98467	3.119	1.644	2.133	2.29867	2.48	2.035	4.702	3.07233	4.41	2.848	1.866	3.04133	8.43343	9.76771	0.98991	0	0	0	0	0.017	0.018	0.018	0.0176667	0.015	0.073	0.113	0.132	0.156	0.016	0.101333	0.029	0.015	0.053	0.0323333	#DIV/0!	0.319079	0	0	0	Ssa01001972,Homeobox-leucine zipper protein,"Homeobox,START"
Ssa05016682	0	0	0.108	0.036	0	0	0.91	0.303333	0	0	0	0	0	0.058	0.037	0.0316667	0.04	0	0	0.0133333	8.42593	0	0.421053	0	0	0	0	0	0	0	0	0	0	0.047	0.043	0	2.934	0.992333	0	0	0.039	0.013	#DIV/0!	0.0131004	21.669	9.537	8.057	Ssa10004143,Alpha-ketoglutarate-dependent dioxygenase,2OG-FeII_Oxy_2
Ssa06019533	0	0.256	0.097	0.117667	0.591	0.587	1.794	0.990667	0.181	1.329	1.239	0.916333	0.129	1.097	1.721	0.982333	0.108	0.106	0.511	0.241667	8.41926	7.78754	0.246013	0.205	0.097	0.238	0.18	0.136	0.144	0	0.0933333	0.12	0.936	0	0.943	0.454	0.126	0.507667	0.118	0.612	0.633	0.454333	0.518519	0.894944	10.507	7.186	12.879	Ssa09024705,Universal stress protein family,Usp
Ssa07020394	0.024	0	0	0.008	0.042	0.041	0.119	0.0673333	0	0.102	0.15	0.084	0	0	0.021	0.007	0.137	0.022	0	0.053	8.41667	10.5	7.57143	0	0	0	0	0	0	0	0	0	0.099	0	0.05	0	0	0.0166667	0.025	0.052	0	0.0256667	#DIV/0!	1.54	2.358	2.584	2.598	Ssa01001437,CDT1-like protein,"CDT1,CDT1_C"
Ssa06017710	0.065	0	0.365	0.143333	0.014	0.24	3.362	1.20533	0.652	0.296	0.345	0.431	0.037	0.147	0.204	0.129333	0.326	0.076	0.11	0.170667	8.4093	3.00698	1.31959	0	0	0	0	0	0	0	0	0	0.017	0.019	0	0	0.073	0.0243333	0.017	0.035	0.076	0.0426667	#DIV/0!	1.75342	0.157	0.083	0.286	Ssa12007121,zinc finger,-
Ssa12007961	0.057	0.032	0.049	0.046	0	0	1.157	0.385667	0	0.912	1.27	0.727333	0.032	0	0.025	0.019	0.217	0.027	0.064	0.102667	8.38406	15.8116	5.40351	0	0.049	0.03	0.0263333	0.034	0	0	0.0113333	0	0.412	0.032	0	0	0.032	0.0106667	0.089	0.092	0	0.0603333	0.43038	5.65625	10.81	10.557	10.165	Ssa08022455,isoform X1,-
Ssa08021852	0.141	0.22	0.258	0.206333	0.937	1.892	2.359	1.72933	1.354	1.978	2.097	1.80967	0.704	1.246	1.878	1.276	0.621	0.379	0.299	0.433	8.38126	8.7706	0.339342	0.384	0.409	0.13	0.307667	0.508	0.247	0.2	0.318333	1.048	1.167	1.184	1.948	1.488	1.221	1.55233	0.55	0.535	0.493	0.526	1.03467	0.338845	5024.93	2101.93	2740.36	Ssa12007849,-,-
Ssa05016341	1.852	0.436	1.26	1.18267	12.815	12.129	4.733	9.89233	1.109	3.703	3.677	2.82967	0.791	0.587	0.207	0.528333	2.86	2.732	1.653	2.415	8.36443	2.39262	4.57098	0.14	0	0	0.0466667	0	0	0.097	0.0323333	1.554	0.956	0.263	0.08	0.077	0.086	0.081	0.08	0	0	0.0266667	0.692857	0.329218	0	0	0	Ssa09024112,Protodermal factor,-
Ssa03013546	0.019	0.087	0.05	0.052	0.101	0.4	0.803	0.434667	0.093	0.268	0.392	0.251	0.066	0.2	0.397	0.221	0.037	0.126	0	0.0543333	8.35897	4.82692	0.245852	0.087	0.033	0.061	0.0603333	0	0	0.073	0.0243333	0.061	0.04	0.066	0.1	0.194	0.022	0.105333	0.1	0.021	0.18	0.100333	0.403315	0.952532	0.705	4.051	2.249	Ssa13008092,Belongs to the short-chain dehydrogenases reductases (SDR) family,"adh_short,adh_short_C2"
Ssa02009859	0.074	0.056	0.085	0.0716667	0.944	0.575	0.268	0.595667	0.709	0.079	0.289	0.359	0.421	0.324	0.441	0.395333	0.539	0.253	0.473	0.421667	8.31163	5.0093	1.06661	0	0	0	0	0	0	0	0	0	0	0	0	0	0	0	0	0.027	0.023	0.0166667	#DIV/0!	#DIV/0!	24.418	22.595	20.668	Ssa04015313,Myb/SANT-like DNA-binding domain,Myb_DNA-bind_4
Ssa03012891	0	0	0.407	0.135667	0	0.234	3.144	1.126	1.512	0.144	0.264	0.64	0	0.094	0.423	0.172333	0.257	0.063	0.152	0.157333	8.29975	4.71744	0.912959	0	0	0	0	0	0	0	0	0	0.279	0	0.07	0	0	0.0233333	0.07	0	0.063	0.0443333	#DIV/0!	1.9	4.59	8.106	5.92	Ssa06018356,Triacylglycerol lipase,"DUF3336,Patatin"
Ssa02009691	0.084	0	0	0.028	0	0.362	0.332	0.231333	1.205	0.626	0.917	0.916	1.336	0.812	0.974	1.04067	0.08	0.234	0.095	0.136333	8.2619	32.7143	0.131006	0.076	0.072	0	0.0493333	0	0	0.105	0.035	0.355	0	0.095	0.436	0.588	0.28	0.434667	0	0.272	0.156	0.142667	0.709459	0.328221	2.224	0.612	2.516	Ssa09025941,BOI-related E3 ubiquitin-protein ligase 2,zf-C3HC4_3
Ssa12006589	0.091	0.102	0.622	0.271667	2.518	2.423	1.791	2.244	1.879	2.123	1.838	1.94667	2.781	1.44	1.778	1.99967	2.752	3.204	2.754	2.90333	8.26012	7.16564	1.45191	0	0	0	0	0	0	0	0	0	0	0	0	0	0	0	0	0	0	0	#DIV/0!	#DIV/0!	13.499	10.391	10.72	Ssa10003427,Cytosolic purine,5_nucleotid
Ssa12006958	0	0.029	0.022	0.017	0	0.044	0.376	0.14	0	0.756	0.415	0.390333	0	0.018	0	0.006	0.024	0.024	0.2	0.0826667	8.23529	22.9608	13.7778	0.252	0.065	0.027	0.114667	0.03	0	0.127	0.0523333	0.724	0.679	0.374	0.553	0.482	0.733	0.589333	1.498	0.93	0.848	1.092	0.456395	1.85294	6.413	2.613	4.973	Ssa02011132,Protein of unknown function (DUF1191),DUF1191
Ssa05015807	14.378	12.479	15.302	14.053	128.064	142.361	76.756	115.727	24.986	41.983	40.703	35.8907	26.171	20.068	23.747	23.3287	42.236	39.2	22.458	34.6313	8.23504	2.55395	1.4845	2.872	5.261	1.886	3.33967	3.735	6.19	4.718	4.881	10.136	13.363	10.086	14.016	8.636	9.306	10.6527	3.622	4.513	4.232	4.12233	1.46152	0.386977	1.398	3.346	1.669	Ssa08022047,leucine-rich repeat receptor-like serine threonine-protein kinase,"LRR_8,Malectin,Pkinase,Pkinase_Tyr"
Ssa08022989	0.034	0.038	0.175	0.0823333	0.222	0.544	1.263	0.676333	3.561	0.853	1.662	2.02533	0.814	4.897	2.509	2.74	0.049	0.032	0	0.027	8.21457	24.5992	0.00985401	0	0	0	0	0	0	0	0	0.036	0	0	0	0	0	0	0.018	0.018	0	0.012	#DIV/0!	#DIV/0!	35.382	19.231	20.371	Ssa06017857,uridine kinase,"AAA_18,PRK"
Ssa10004816	0.018	0.021	0.142	0.0603333	0	0.159	1.326	0.495	0.088	0.509	0.488	0.361667	0.063	0.089	0.164	0.105333	0.087	0.086	0.145	0.106	8.20442	5.99448	1.00633	0.383	0.158	0.019	0.186667	0	0	0.023	0.00766667	0.117	0.265	0.167	0.076	0.313	0.041	0.143333	0.343	0.496	1.231	0.69	0.0410714	4.81395	7.574	8.937	10.545	Ssa06019486,-,-
Ssa09025735	0	0.074	1.624	0.566	0	0	13.863	4.621	1.145	0	0	0.381667	0	0.225	0.058	0.0943333	0.031	0	3.342	1.12433	8.16431	0.674323	11.9187	0	0	0.034	0.0113333	0	0	0	0	0	0	0	0	0	0	0	0	0	0	0	0	#DIV/0!	2.458	13.35	2.89	Ssa03013795,"at-exp1,atexp1,atexpa1,athexp alpha 1.2,exp1,expa1","DPBB_1,Pollen_allerg_1"
Ssa03012406	0.554	0.447	1.019	0.673333	7.704	6.422	2.348	5.49133	1.39	2.699	2.904	2.331	1.081	0.219	0.141	0.480333	15.862	5.234	2.675	7.92367	8.15545	3.46188	16.4962	0.072	0.204	0	0.092	0.095	0.101	0.099	0.0983333	0.335	2.123	0.18	0.082	0.159	0.088	0.109667	1.971	0.428	0	0.799667	1.06884	7.29179	3.421	0.702	1.87	Ssa10003009,"Contains the following InterPro domains Zinc finger, C2H2-like (InterPro IPR015880), Zinc finger, C2H2-type (InterPro IPR007087)",-
Ssa08022506	0	0.073	0.152	0.075	0	0	1.819	0.606333	0.129	0	0.038	0.0556667	0	0.446	0.447	0.297667	0.077	0	0.236	0.104333	8.08444	0.742222	0.350504	0	0	0	0	0.019	0	0	0.00633333	0.017	0	0	0.017	0	0	0.00566667	0	0	0	0	#DIV/0!	0	34.761	16.348	15.876	Ssa08022500,Belongs to the GST superfamily,"GST_C,GST_N"
Ssa04014460	13.958	14.51	36.219	21.5623	151.887	241.435	123.708	172.343	11.504	25.723	28.916	22.0477	27.704	8.187	10.952	15.6143	8.052	14.632	16.954	13.2127	7.9928	1.02251	0.846188	2.422	4.567	3.197	3.39533	10.055	13.114	15.817	12.9953	5.472	3.362	3.76	2.451	1.938	2.508	2.299	61.257	41.451	56.634	53.114	3.82741	23.1031	0	0	0	Ssa05016313,peptidase inhibitor activity,CAP
Ssa11006016	0.346	0.13	0.496	0.324	1.405	2.791	3.539	2.57833	2.58	4.06	3.786	3.47533	5.123	2.793	4.33	4.082	0.768	0.86	0.78	0.802667	7.95782	10.7263	0.196636	0.105	0	0	0.035	0	0	0	0	0.122	0	0.131	0.12	0.231	0.514	0.288333	0	0	0.107	0.0356667	0	0.123699	10.816	18.246	21.681	Ssa12006499,Rhomboid protein,Rhomboid
Ssa11005317	3.546	1.955	2.103	2.53467	14.716	23.439	22.341	20.1653	11.865	12.467	12.759	12.3637	16.193	13.925	31.71	20.6093	13.758	16.047	8.659	12.8213	7.95581	4.87783	0.622113	0.497	1.63	0.044	0.723667	0.758	1.343	0	0.700333	0.179	1.263	1.007	0.219	0.465	4.375	1.68633	0	0.456	0.196	0.217333	0.967757	0.128879	1.064	30.043	15.099	Ssa07020195,disease resistance,"LRR_8,NB-ARC"
Ssa10003257	0.042	0.096	0.4	0.179333	0.847	1.17	2.263	1.42667	1.082	0.768	0.761	0.870333	0.145	0.41	1.475	0.676667	0.282	0.276	0.143	0.233667	7.95539	4.85316	0.34532	0.077	0.036	0.089	0.0673333	0.051	0.108	0.213	0.124	0.539	0.83	0.385	0.396	0.34	0.425	0.387	0.308	0.092	0.118	0.172667	1.84158	0.446167	12.398	18.276	22.594	Ssa09024004,-,-
Ssa12006573	0.758	0	0.521	0.426333	1.186	4.188	4.798	3.39067	1.694	4.525	2.486	2.90167	1.208	9.329	6.633	5.72333	0.144	0.141	0	0.095	7.95309	6.8061	0.0165987	0	0	0	0	0	0.193	0	0.0643333	0.161	16.735	0	10.875	0	0	3.625	0	3.44	0	1.14667	#DIV/0!	0.316322	2.479	2.763	1.936	Ssa12006979,Belongs to the glycosyltransferase 8 family,Glyco_transf_8
Ssa09025203	1.324	0.616	0.903	0.947667	9.582	8.475	4.546	7.53433	0.622	0.706	0.7	0.676	0.443	0.323	1.426	0.730667	0.407	0.073	0.176	0.218667	7.9504	0.713331	0.29927	0	0.201	0.082	0.0943333	0	0.05	0	0.0166667	0.124	0.121	0	0.04	0	0	0.0133333	0.04	0	0	0.0133333	0.176678	1	13.429	14.844	15.366	Ssa05017297,Purple acid phosphatase,"Metallophos,Metallophos_C,Pur_ac_phosph_N"
Ssa02010962	0.166	0.467	0.142	0.258333	2.446	2.144	1.556	2.04867	0.793	0.794	0.129	0.572	0.377	0.286	0.739	0.467333	1.18	1.465	0.093	0.912667	7.93032	2.21419	1.95292	1.049	0.426	0.087	0.520667	0.793	0.948	0.312	0.684333	0.175	0.085	0.564	0.172	0.332	0.092	0.198667	0.086	0	0.231	0.105667	1.31434	0.531879	6.062	2.418	1.841	Ssa02010305,-,-
Ssa01000720	0.047	0.027	0.142	0.072	0.287	0.795	0.63	0.570667	1.734	3.296	2.323	2.451	0.054	0.033	0.063	0.05	0.404	0.11	0.08	0.198	7.92593	34.0417	3.96	0.492	1.053	0.149	0.564667	0.085	0.18	0	0.0883333	1.925	8.184	0.08	0.663	0.331	0.316	0.436667	2.181	3.087	0.308	1.85867	0.156434	4.25649	2.282	4.965	4.591	Ssa03014127,Phosphoribulokinase / Uridine kinase family,"Cytidylate_kin,PRK"
Ssa09025659	1.183	3.252	13.551	5.99533	53.824	63.033	25.59	47.4823	23.176	79.42	79.862	60.8193	0.584	2.727	2.184	1.83167	28.702	7.605	6.667	14.3247	7.91988	10.1444	7.82056	0.786	1.049	0.207	0.680667	0.567	0.602	0.595	0.588	82.436	169.982	7.928	6.274	1.976	4.131	4.127	206.703	117.475	6.792	110.323	0.863859	26.7321	124.548	85.921	83.816	Ssa03013259,Nucleoredoxin,"C1_2,Thioredoxin_8"
Ssa02011130	0	0	0.019	0.00633333	0	0	0.15	0.05	0.694	0.069	0.085	0.282667	0	0.075	0.136	0.0703333	0.062	0.02	0.024	0.0353333	7.89474	44.6316	0.50237	0	0	0	0	0	0	0	0	0	0.045	0	0	0	0	0	0	0	0	0	#DIV/0!	#DIV/0!	817.737	785.864	757.895	Ssa03013094,RNA binding,RRM_1
Ssa08022476	0	0	0.019	0.00633333	0	0	0.15	0.05	0.694	0.093	0.085	0.290667	0	0.075	0.136	0.0703333	0.062	0.02	0.024	0.0353333	7.89474	45.8947	0.50237	0	0	0	0	0	0	0	0	0	0.045	0	0	0	0	0	0	0	0	0	#DIV/0!	#DIV/0!	0.346	0.645	0.631	Ssa12006614,RING-H2 finger protein,zf-RING_2
Ssa04014418	0	0.145	0.221	0.122	0.223	0.887	1.778	0.962667	0	1.916	1.103	1.00633	0.584	0.888	1.376	0.949333	0.122	0	0	0.0406667	7.89071	8.24863	0.0428371	0.465	0	0.269	0.244667	0	0	0	0	0.408	0.927	0.146	0.133	1.158	0.429	0.573333	0.533	0.416	0.12	0.356333	0	0.621512	1.043	1.903	1.494	Ssa08023637,myb domain protein 69,Myb_DNA-binding
Ssa10003720	0.048	0.134	0.654	0.278667	0.496	2.587	3.505	2.196	4.405	0.685	1.727	2.27233	0.271	1.102	2.124	1.16567	0	0.111	0	0.037	7.88038	8.15431	0.0317415	0.065	0	0.025	0.03	0.057	0.061	0.03	0.0493333	0.202	0.712	2.674	0.89	0	0	0.296667	0.123	0.103	0.244	0.156667	1.64444	0.52809	0	0	0	Ssa03013443,Pentatricopeptide repeat-containing protein,"DYW_deaminase,PPR"
Ssa01000787	0.088	0.099	0.076	0.0876667	1.377	0.608	0.087	0.690667	2.669	1.688	3.023	2.46	3.104	0.608	0.707	1.473	0.334	0.246	0.297	0.292333	7.87833	28.0608	0.198461	0	0	0	0	0	0.224	0	0.0746667	0	0.182	0.1	0	0	0.098	0.0326667	0	0.19	0.082	0.0906667	#DIV/0!	2.77551	134.762	92.487	93.883	Ssa01002779,Belongs to the universal ribosomal protein uL23 family,"Ribosomal_L23,Ribosomal_L23eN"
Ssa04015722	7.799	5.916	11.345	8.35333	59.259	86.929	50.537	65.575	28.499	34.713	32.298	31.8367	34.664	23.698	52.418	36.9267	14.819	20.577	13.633	16.343	7.85016	3.81125	0.44258	2.088	1.832	1.643	1.85433	18.544	19.854	23.439	20.6123	9.921	9.78	7.209	6.156	4.821	5.931	5.636	2.541	1.446	1.616	1.86767	11.1158	0.331382	1.156	2.227	0.908	Ssa03014219,"SANT SWI3, ADA2, N-CoR and TFIIIB'' DNA-binding domains",Myb_DNA-binding
Ssa03012972	6.171	3.654	4.683	4.836	35.777	51.056	27.022	37.9517	6.218	13.093	10.012	9.77433	2.796	3.646	6.795	4.41233	6.83	4.744	1.08	4.218	7.84774	2.02116	0.955957	0.488	0.874	1.257	0.873	0.287	0.839	0.075	0.400333	0.444	1.855	0.136	0.374	0.12	1.135	0.543	0.684	1.101	0.502	0.762333	0.458572	1.40393	1.097	2.065	1.773	Ssa11005803,Transcription factor BRX N-terminal domain,"BRX,BRX_N,FYVE,PH_12,RCC1"
Ssa05016786	0	0	0.954	0.318	0.161	0	7.32	2.49367	5.909	0	0.289	2.066	0	5.245	4.296	3.18033	0	0	4.796	1.59867	7.84172	6.49686	0.502673	0	0	0	0	0	0	0	0	0	0	0	0.192	0	0	0.064	0	0	0	0	#DIV/0!	0	393.144	431.81	338.965	Ssa12006572,E3 ubiquitin-protein ligase,"DUF1117,zf-RING_2,zinc_ribbon_9"
Ssa01001677	9.15	4.737	17.029	10.3053	118.145	100.237	23.946	80.776	140.936	51.616	58.354	83.6353	96.762	44.817	90.74	77.4397	97.614	60.023	44.253	67.2967	7.83827	8.11573	0.869021	5.006	5.233	4.601	4.94667	5.707	7.279	4.553	5.84633	17.165	36.191	17.969	8.325	7.26	4.248	6.611	38.981	20.19	19.696	26.289	1.18187	3.97655	0.142	0	0	Ssa04015411,Transcription factor,HLH
Ssa06017718	2.211	1.636	6.026	3.291	9.876	57.212	10.182	25.7567	167.662	180.532	216.564	188.253	0.434	2.742	11.236	4.804	6.737	1.279	0.773	2.92967	7.8264	57.2023	0.609839	0.483	0.72	0.24	0.481	0.548	0.291	0.096	0.311667	59.938	287.641	3.377	33.14	4.433	4.503	14.0253	49.152	22.003	0.142	23.7657	0.647956	1.69448	0	0	0	Ssa06019731,Plant protein of unknown function,DUF247
Ssa05016969	0.135	0.153	0.116	0.134667	0	0.35	2.81	1.05333	0	0.577	0.845	0.474	0.154	0.468	0	0.207333	0	0.126	0.61	0.245333	7.82178	3.5198	1.18328	0.245	0.464	0	0.236333	0	0	0	0	0	0.558	0	3.095	0.136	0.452	1.22767	0	0	0.252	0.084	0	0.0684225	7.71	9.983	10.999	Ssa09025637,Belongs to the protein kinase superfamily,Pkinase
Ssa06019454	0	0	0.028	0.00933333	0.028	0	0.191	0.073	0	0	0.025	0.00833333	0	0.089	0	0.0296667	0	0	0.036	0.012	7.82143	0.892857	0.404494	0	0	0	0	0.077	0.082	0	0.053	0	0	0	0	0.065	0.072	0.0456667	0	0	0	0	#DIV/0!	0	17.976	36.621	34.109	Ssa02010221,Calcium-dependent protein kinase,"EF-hand_1,EF-hand_5,EF-hand_6,Pkinase"
Ssa06018412	0.03	0	0.078	0.036	0.026	0.157	0.661	0.281333	0.049	0.389	0.119	0.185667	0.035	0.021	0.054	0.0366667	0.144	0.028	0.068	0.08	7.81481	5.15741	2.18182	0	0.026	0.064	0.03	0	0	0	0	0.064	0.251	0.069	0	0	0.034	0.0113333	0.315	0.131	0.113	0.186333	0	16.4412	1.963	2.51	2.201	Ssa03013341,Belongs to the formin-like family,FH2
Ssa01001509	0	0	0.246	0.082	0	0.494	1.414	0.636	0.913	0.152	0.223	0.429333	0.163	0.099	0	0.0873333	0.136	0.133	0	0.0896667	7.7561	5.23577	1.02672	0	0.123	0	0.041	0	0	0	0	0	0	0	0	0	0	0	0.148	0	0	0.0493333	0	#DIV/0!	35.965	27.029	36.739	Ssa06018030,phenylalanine,Lyase_aromatic
Ssa08023031	0	0	0.063	0.021	0.021	0.127	0.34	0.162667	0.118	0.393	0.269	0.26	0.056	0.102	0.022	0.06	0.187	0.046	0.111	0.114667	7.74603	12.381	1.91111	0.022	0.042	0.026	0.03	0	0.063	0.031	0.0313333	0.078	0.051	0.14	0.077	0.099	0.082	0.086	0.077	0.106	0.091	0.0913333	1.04444	1.06202	0.933	1.293	1.342	Ssa04014682,sodium metabolite cotransporter BASS3,SBF
Ssa06019648	0	0	0.13	0.0433333	0.132	0.196	0.675	0.334333	0	0.404	0.296	0.233333	0	0.21	0	0.07	0	0.141	0	0.047	7.71538	5.38462	0.671429	0.48	0.455	0.159	0.364667	0	0	0	0	0	0.235	0.172	0.315	0.684	0	0.333	0.315	0.246	0.847	0.469333	0	1.40941	6.129	2.35	2.248	Ssa05017280,Domain of unknown function (DUF4408),DUF4408
Ssa05017104	1.443	0.293	3.496	1.744	6.304	13.962	20.057	13.441	8.095	12.939	10.547	10.527	1.937	2.789	6.147	3.62433	1.793	0.758	0.292	0.947667	7.707	6.03612	0.261473	0.469	0.349	0.388	0.402	0.798	0.612	0.698	0.702667	4.939	5.231	2.017	1.424	0.63	3.917	1.99033	0.423	0.2	0.517	0.38	1.74793	0.190923	11.073	10.189	6.26	Ssa13009389,Rare lipoprotein A (RlpA)-like double-psi beta-barrel,"DPBB_1,Pollen_allerg_1"
Ssa02011957	0	0	0.028	0.00933333	0.028	0.028	0.159	0.0716667	0	0	0.05	0.0166667	0	0.089	0.086	0.0583333	0.03	0	0.036	0.022	7.67857	1.78571	0.377143	0	0	0	0	0	0	0	0	0	0	0	0.067	0.064	0.143	0.0913333	0.033	0	0	0.011	#DIV/0!	0.120438	15.92	14.449	17.443	Ssa01001181,DEAD-box ATP-dependent RNA helicase,"DEAD,Helicase_C"
Ssa11005690	0.234	0.264	0.503	0.333667	1.679	3.297	2.706	2.56067	0.818	2.916	4.478	2.73733	0.733	0.921	0.562	0.738667	1.376	1.499	0.874	1.24967	7.67433	8.2038	1.69179	0.106	0.05	0.015	0.057	0.018	0.093	0.037	0.0493333	1.705	7.034	0.116	0.228	0.191	0.13	0.183	1.549	0.3	0.123	0.657333	0.865497	3.59199	5.598	21.233	18.833	Ssa02012173,Protein of unknown function (DUF3755),"DUF3755,Myb_DNA-binding"
Ssa01001222	0.153	0	0.329	0.160667	0.133	0.033	3.528	1.23133	80.238	0.164	0.569	26.9903	0.044	0.159	1.199	0.467333	0	0.071	0	0.0236667	7.6639	167.99	0.0506419	0.278	0.197	0.161	0.212	0	0	0	0	0.081	0.317	0	0	0	0	0	0	0.124	0	0.0413333	0	#DIV/0!	13.705	9.153	5.365	Ssa11006031,Cinnamyl alcohol dehydrogenase-like protein,"ADH_N,ADH_zinc_N"
Ssa02011200	0.749	0.808	0.336	0.631	4.218	5.218	5.069	4.835	3.317	4.192	6.209	4.57267	3.236	10.56	13	8.932	1.245	0.571	0.192	0.669333	7.66244	7.2467	0.0749366	0	0	0	0	0.102	0.217	0.086	0.135	0	0.141	0.077	0.549	0.205	0.247	0.333667	0	0	0.016	0.00533333	#DIV/0!	0.015984	2.279	1.495	4.152	Ssa13008243,Possible catecholamine-binding domain present in a variety of eukaryotic proteins.,"Cytochrom_B561,DOMON"
Ssa08022830	0	0	3.93	1.31	12.215	17.846	0	10.0203	4.566	25.866	26.093	18.8417	6.602	0	0	2.20067	4.657	4.719	3.406	4.26067	7.64911	14.383	1.93608	0	0	0	0	39.526	25.268	0	21.598	38.427	41.642	12.804	34.403	41.187	0	25.1967	27.476	36.378	38.1	33.9847	#DIV/0!	1.34878	36.503	24.969	28.349	Ssa02009708,Peptidyl-prolyl cis-trans isomerase,FKBP_C
Ssa03012887	0.257	0.053	0.18	0.163333	2.496	1.088	0.162	1.24867	1.416	0.846	1.768	1.34333	1.408	1.194	2.043	1.54833	1.22	1.587	4.682	2.49633	7.6449	8.22449	1.61227	0.042	0.08	0.049	0.057	0.056	0.119	0.147	0.107333	0.074	0.409	0.159	0.097	0.234	0.65	0.327	0.097	0.252	0.043	0.130667	1.88304	0.399592	17.868	20.354	16.211	Ssa13008459,disease resistance,"NB-ARC,RPW8"
Ssa01000429	0.171	0.129	0.505	0.268333	1.056	2.245	2.834	2.045	1.273	13.958	10.003	8.41133	0.173	0.381	0.356	0.303333	0.559	0.212	0.192	0.321	7.62112	31.3466	1.05824	0.086	0.309	0.1	0.165	0.159	0.193	0.334	0.228667	3.096	34.5	0.56	2.466	0.437	0.423	1.10867	4.314	2.646	0.3	2.42	1.38586	2.1828	0.851	2.609	1.614	Ssa05016411,Belongs to the glycosyl hydrolase 9 (cellulase E) family,Glyco_hydro_9
Ssa09025480	0.572	0.395	2.292	1.08633	12.317	7.928	4.525	8.25667	0.71	1.524	1.538	1.25733	1.772	9.974	4.455	5.40033	35.043	8.583	13.247	18.9577	7.60049	1.15741	3.51046	1.295	1.472	0.5	1.089	0.19	0.162	1.398	0.583333	3.534	2.295	0.686	2.841	1.879	1.522	2.08067	7.321	1.786	3.756	4.28767	0.53566	2.06072	25.13	44.582	53.868	Ssa01001294,WRKY transcription factor,WRKY
Ssa09025124	0.047	0	0	0.0156667	0.123	0.109	0.125	0.119	0	0.017	0.025	0.014	0	0	0	0	0.015	0.015	0.018	0.016	7.59574	0.893617	#DIV/0!	0	0	0	0	0.057	0.02	0.119	0.0653333	0	0.033	0.018	0.066	0.016	0.088	0.0566667	0	0	0.015	0.005	#DIV/0!	0.0882353	11.492	6.484	8.601	Ssa11005287,Thylakoid lumenal protein At1g12250,Pentapeptide
Ssa06019158	0	0	0.09	0.03	0	0.113	0.568	0.227	0.083	0.334	0.041	0.152667	0	0.289	0.093	0.127333	0.074	0	0	0.0246667	7.56667	5.08889	0.193717	0	0	0	0	0	0	0	0	0	0	0	0	0	0	0	0.027	0	0.024	0.017	#DIV/0!	#DIV/0!	17.843	26.224	25.33	Ssa02010378,Nuclear matrix constituent protein,-
Ssa01001767	0	0	0.407	0.135667	0.017	0	3.062	1.02633	0.031	1.366	0.416	0.604333	0	0.055	0.018	0.0243333	0.525	0.331	0.467	0.441	7.56511	4.45455	18.1233	1.446	0.558	0.6	0.868	0	0	0	0	0	0.122	0.067	0.062	0.04	0	0.034	0	0	0.073	0.0243333	0	0.715686	18.117	42.552	31.587	Ssa10003681,"Domain found in a variety of signalling proteins, always encircled by uDENN and dDENN","DENN,uDENN"
Ssa09025967	0.023	0.026	0.419	0.156	0.101	0.281	3.151	1.17767	0.223	1.19	1.471	0.961333	0.053	0.257	0.104	0.138	1.48	0.065	0.026	0.523667	7.54915	6.16239	3.79469	0.147	0.06	0	0.069	0	0.059	0.029	0.0293333	0.049	1.128	0.053	0.048	0	0.026	0.0246667	0	0.075	0	0.025	0.425121	1.01351	5.322	14.102	7.458	Ssa01001579,cohesion protein,STAG
Ssa08022709	0.051	0	0	0.017	0	0.132	0.253	0.128333	0	0.327	0.359	0.228667	0	0.177	0.046	0.0743333	0	0	0	0	7.54902	13.451	0	0.139	0.219	0.054	0.137333	0	0	0	0	2.601	4.222	0	1.702	0.154	0	0.618667	2.973	15.753	0.476	6.40067	0	10.3459	43.355	21.002	23.682	Ssa01000073,Domain in histone families 1 and 5,Linker_histone
Ssa10004202	0	0	0.122	0.0406667	0.123	0.343	0.448	0.304667	0.498	0.211	0.177	0.295333	0.065	0.137	0.202	0.134667	0.242	0.053	0.192	0.162333	7.4918	7.2623	1.20545	0.128	0.049	0.208	0.128333	0.136	0.325	0.214	0.225	0.3	0.117	0.322	0.177	0.199	0.063	0.146333	0.176	0.122	0.079	0.125667	1.75325	0.85877	11.547	21.667	26.608	Ssa01000944,Serine threonine-protein kinase,Pkinase
Ssa05016314	0	0	0.032	0.0106667	0	0	0.239	0.0796667	0	0.794	0.712	0.502	0.085	0	0	0.0283333	0	0	0.063	0.021	7.46875	47.0625	0.741176	0.775	0.16	0.449	0.461333	0.067	0.024	0.023	0.038	0.039	0.269	0.169	0	0	0.021	0.007	1.275	0.563	0.624	0.820667	0.0823699	117.238	0	0	0	Ssa07020521,subtilisin-like protease,"Inhibitor_I9,PA,Peptidase_S8"
Ssa07020908	0.235	0	0.707	0.314	0.409	2.437	4.187	2.34433	0.939	0.251	0.826	0.672	0	0	0	0	2.122	0.219	0.928	1.08967	7.46603	2.14013	#DIV/0!	1.384	1.311	0.74	1.145	4.506	8.53	2.217	5.08433	2.118	1.335	1.068	0.978	0	0.131	0.369667	5.981	1.398	2.846	3.40833	4.44047	9.22002	224.999	151.434	204.764	Ssa06017667,ubiquitin-40S ribosomal protein,"Ribosomal_S27,ubiquitin"
Ssa03012420	0	0	0.108	0.036	0.082	0.135	0.588	0.268333	0.15	0.334	0.22	0.234667	0	0.022	0.028	0.0166667	0.178	0.058	0.071	0.102333	7.4537	6.51852	6.14	0.113	0.027	0	0.0466667	0	0	0	0	0.066	0.226	0	0.065	0.031	0.174	0.09	0	0.034	0.029	0.021	0	0.233333	34.028	33.172	26.801	Ssa01001059,Digalactosyldiacylglycerol synthase 1,"Glyco_trans_1_4,Glycos_transf_1"
Ssa10004833	7.295	6.95	6.621	6.95533	36.219	56.704	62.561	51.828	188.286	254.21	163.185	201.894	47.735	57.51	51.263	52.1693	8.356	10.772	4.281	7.803	7.45155	29.0272	0.149571	4.263	2.645	1.575	2.82767	55.107	51.053	37.639	47.933	401.399	142.954	30.375	18.148	12.279	56.316	28.9143	4.101	4.389	7.124	5.20467	16.9514	0.180003	2.375	1.436	1.311	Ssa01000553,Cystinosin homolog,PQ-loop
Ssa07020880	0.197	0.074	1.492	0.587667	0.199	1.839	11.083	4.37367	3.558	11.805	8.264	7.87567	1.044	0.521	0.293	0.619333	5.852	3.174	1.772	3.59933	7.44243	13.4016	5.81163	0	0	0	0	0	0.042	0	0.014	0.035	1.048	0.037	0	0	0	0	0	0	0.183	0.061	#DIV/0!	#DIV/0!	84.471	75.811	18.77	Ssa08022233,Vacuolar protein sorting-associated protein 62,Vps62
Ssa02012066	0	0	0.491	0.163667	0	0.038	3.611	1.21633	0.07	0	0.034	0.0346667	0	0.091	0.118	0.0696667	0.418	0	0	0.139333	7.43177	0.211813	2	0	0	0	0	0	0	0.055	0.0183333	0	0	0	0.046	0	13.92	4.65533	0	0.048	0.123	0.057	#DIV/0!	0.012244	21.715	20.902	17.871	Ssa08021994,At4g28440-like,-
Ssa01001629	0	0	0.486	0.162	0.041	0.163	3.402	1.202	3.311	0.251	0.994	1.51867	0.215	0.358	0.21	0.261	1.567	0.219	0.797	0.861	7.41975	9.37449	3.29885	0	0	0	0	0	0	0	0	0	0	0	0	0	1.26	0.42	0.049	0	0.044	0.031	#DIV/0!	0.0738095	6.115	5.411	6.129	Ssa06018916,Putative S-adenosyl-L-methionine-dependent methyltransferase,"Methyltransf_11,Methyltransf_29"
Ssa06017834	0	0	0.017	0.00566667	0.034	0.034	0.058	0.042	0.031	0.021	0.091	0.0476667	0	0	0	0	0.037	0.018	0	0.0183333	7.41176	8.41176	#DIV/0!	0.299	1.001	0.796	0.698667	1.537	1.485	1.32	1.44733	1.483	1.585	0.133	0.445	0.117	0.173	0.245	0.061	0.021	0.018	0.0333333	2.07156	0.136054	18.326	3.314	64.121	Ssa03012415,-,-
Ssa12007252	0.059	0	0	0.0196667	0.051	0.152	0.233	0.145333	0	0.125	0.138	0.0876667	0.468	0.447	0.105	0.34	0.223	0.657	0.133	0.337667	7.38983	4.45763	0.993137	0.319	0.05	0.123	0.164	0.07	0	0.148	0.0726667	0.561	0.485	0.401	4.462	2.711	0.59	2.58767	1.343	2.033	2.791	2.05567	0.443089	0.794409	0	0	0	Ssa04015544,transcription factor,Myb_DNA-binding
Ssa01001220	0	0.048	0.876	0.308	0.185	1.174	5.465	2.27467	2.715	1.178	1.826	1.90633	0.194	1.617	2.923	1.578	0.525	0.198	0.096	0.273	7.38528	6.18939	0.173004	0	0	0	0	0	0	0	0	0.09	0.044	0.048	0	0	0.142	0.0473333	0	0	0.04	0.0133333	#DIV/0!	0.28169	4.849	3.478	5.758	Ssa09025726,repeat-containing protein,MORN
Ssa08022408	0.681	0.865	0.336	0.627333	4.232	5.307	4.311	4.61667	3.371	4.192	5.929	4.49733	3.255	10.56	12.802	8.87233	1.278	0.587	0.192	0.685667	7.35919	7.16897	0.0772814	0	0	0	0	0.102	0.217	0.086	0.135	0	0.141	0.077	0.549	0.205	0.228	0.327333	0	0	0.016	0.00533333	#DIV/0!	0.0162933	283.868	190.281	217.376	Ssa12006733,"Catalyzes the conversion of hemimercaptal, formed from methylglyoxal and glutathione, to S-lactoylglutathione",Glyoxalase
Ssa02012134	0.034	0	0.058	0.0306667	0	0.175	0.502	0.225667	0	0	0	0	0.038	0	0.03	0.0226667	0	0.032	0	0.0106667	7.3587	0	0.470588	0	0	0	0	0	0	0.043	0.0143333	0.036	0.07	0.038	0.07	0.034	0	0.0346667	0.07	0.037	0.031	0.046	#DIV/0!	1.32692	0.039	1.251	0	Ssa12007835,Belongs to the multi antimicrobial extrusion (MATE) (TC 2.A.66.1) family,MatE
Ssa09024919	0	0.568	1.585	0.717667	2.333	5.214	8.296	5.281	9.643	7.511	11.004	9.386	3.055	1.972	2.996	2.67433	2.231	0.625	1.89	1.582	7.35857	13.0785	0.591549	0.608	1.007	0.88	0.831667	33.147	31.6	19.402	28.0497	24.702	12.116	37.722	13.43	6.725	6.915	9.02333	4.179	7.433	7.495	6.369	33.7271	0.705837	0.028	0.068	0.026	Ssa12006877,Belongs to the glycosyltransferase 2 family,Cellulose_synt
Ssa04015214	0	0	0.124	0.0413333	0.251	0.375	0.286	0.304	0.462	0.308	0.113	0.294333	0.658	0.3	0.387	0.448333	0.137	0.269	0.163	0.189667	7.35484	7.12097	0.423048	0	0	0	0	0.173	0	0.182	0.118333	0.46	0	0	0	0.145	0	0.0483333	0	0.313	0	0.104333	#DIV/0!	2.15862	6.431	13.858	13.381	Ssa01000220,Rhodanese-like domain-containing protein,"FSH1,Rhodanese_C"
Ssa05016023	0.043	0.061	0.075	0.0596667	0.028	0.084	1.204	0.438667	0	1.216	0.424	0.546667	0	0.09	0.058	0.0493333	0.01	0	0.024	0.0113333	7.35196	9.16201	0.22973	0	0	0	0	0.013	0	0	0.00433333	0	0.034	0	0	0	0	0	0	0	0	0	#DIV/0!	#DIV/0!	2.983	1.19	1.359	Ssa11005163,LSD1 zinc finger,zf-LSD1
Ssa10004822	0	0	0.378	0.126	0.153	0.532	2.089	0.924667	1.686	0.375	0.344	0.801667	0	0.122	0.079	0.067	1.17	0.164	0.099	0.477667	7.33862	6.36243	7.12935	0	0	0	0	0	0	0	0	0	0	0	0	0	0.098	0.0326667	0	0	0	0	#DIV/0!	0	5.283	4.168	4.118	Ssa06017959,Protein SLOW GREEN 1,"TPR_16,TPR_19,TPR_6"
Ssa13008296	0.668	0.833	5.443	2.31467	25.177	12.574	13.196	16.9823	10.671	6.313	8.673	8.55233	6.373	6.66	13.582	8.87167	12.675	7.105	6.102	8.62733	7.33684	3.69484	0.972459	3.61	1.166	0.363	1.713	1.545	1.848	2.086	1.82633	3.54	3.828	5.182	2.659	0.947	0.205	1.27033	9.041	9.538	15.572	11.3837	1.06616	8.96117	13.373	18.192	15.439	Ssa09025692,F-box kelch-repeat protein,"F-box,F-box-like,Kelch_1"
Ssa08023253	0.048	0	0	0.016	0.042	0.167	0.143	0.117333	0.154	0.155	0.113	0.140667	0	0.033	0.043	0.0253333	0.092	0.045	0.109	0.082	7.33333	8.79167	3.23684	0	0.166	0	0.0553333	0.116	0.185	0.365	0.222	0.154	0.05	0	0	0	0.054	0.018	0	0.052	0.045	0.0323333	4.01205	1.7963	35.311	39.753	45.626	Ssa08023219,Histone deacetylase,Hist_deacetyl
Ssa05016645	0.082	0.092	0.982	0.385333	0.071	1.199	7.192	2.82067	0.522	1.742	1.276	1.18	0.279	0.904	0.584	0.589	0.466	0.228	0.644	0.446	7.32007	3.06228	0.757216	0.074	0	0.086	0.0533333	0	0	0	0	0	0	0.186	0.085	0.164	0	0.083	0.17	0.177	0.228	0.191667	0	2.30924	0.979	3.005	1.853	Ssa12007595,Belongs to the iron ascorbate-dependent oxidoreductase family,"2OG-FeII_Oxy,DIOX_N"
Ssa12007510	0.043	0	0	0.0143333	0	0.037	0.277	0.104667	0	0.115	0.236	0.117	0	0.119	0.096	0.0716667	0	0	0	0	7.30233	8.16279	0	0.02	0	0.045	0.0216667	0.103	0.055	0.027	0.0616667	0.206	0.267	0.147	0.359	0.519	0.409	0.429	0.067	0.28	0.261	0.202667	2.84615	0.472416	16.602	20.376	22.538	Ssa02011180,General transcription factor 3C polypeptide,"TPR_16,TPR_19,TPR_6,TPR_7,TPR_8"
Ssa06019599	0	0	0.044	0.0146667	0	0.015	0.306	0.107	0	0.183	0.174	0.119	0	0	0	0	0.049	0.032	0	0.027	7.29545	8.11364	#DIV/0!	0.016	0	0	0.00533333	0.021	0.022	0	0.0143333	0.018	0.053	0	0	0.034	0.019	0.0176667	0.071	0.019	0	0.03	2.6875	1.69811	15.046	24.077	24.891	Ssa09025127,AhpC/TSA family,"AhpC-TSA,Redoxin"
Ssa07021042	6.893	3.099	61.908	23.9667	244.669	218.07	59.97	174.236	657.421	678.657	768.274	701.451	214.329	94.448	124.613	144.463	379.562	157.604	101.886	213.017	7.26994	29.2678	1.47454	1.515	0.057	0.07	0.547333	0	1.533	0	0.511	1.205	171.247	0.456	66.59	9.524	0	25.3713	0.556	2.314	2.492	1.78733	0.933618	0.070447	155.505	116.109	166.58	Ssa03012963,-,-
Ssa08023533	5.548	3.266	5.638	4.81733	24.012	35.322	45.641	34.9917	103.696	30.656	41.74	58.6973	84.714	23.452	35.977	48.0477	35.413	33.087	36.106	34.8687	7.2637	12.1846	0.72571	0	0	0	0	0.047	0.05	0.049	0.0486667	0.621	2.459	0.044	0.244	0.039	0.261	0.181333	0.406	0.296	0.182	0.294667	#DIV/0!	1.625	3.484	2.053	2.442	Ssa09024778,U-box domain-containing protein,Arm
Ssa10004117	1.531	1.831	1.006	1.456	7.465	15.556	8.702	10.5743	91.964	141.449	41.058	91.4903	13.772	7.205	6.677	9.218	1.826	2.07	0.88	1.592	7.26259	62.8368	0.172706	1.142	0.747	0.473	0.787333	27.58	23.16	26.424	25.7213	403.67	125.51	14.63	17.328	2.227	114.483	44.6793	1.216	1.266	0.671	1.051	32.6689	0.0235232	13.86	19.264	47.257	Ssa07019900,mitochondrial protein,"RVT_2,Retrotran_gag_3,Retrotrans_gag,gag_pre-integrs,rve"
Ssa06019064	4.69	6.559	3.677	4.97533	34.524	45.863	27.87	36.0857	229.611	209.71	124.206	187.842	85.194	54.335	47.371	62.3	12.801	12.171	6.082	10.3513	7.25291	37.7547	0.166153	0.708	1.182	0.625	0.838333	107.161	116.262	72.954	98.7923	218.697	108.846	90.044	38.78	28.876	104.427	57.361	7.148	6.396	8.732	7.42533	117.844	0.129449	22.784	29.333	21.215	Ssa05016544,Belongs to the UDP-glycosyltransferase family,UDPGT
Ssa10003047	0.106	0	0.386	0.164	0.505	0.867	2.17	1.18067	0.084	1.324	2.023	1.14367	0.06	1.097	0.826	0.661	0.1	0.492	0.149	0.247	7.19919	6.97358	0.373676	0.072	0.045	0.028	0.0483333	0.063	0	0.199	0.0873333	0.7	1.364	1.771	0.192	0	1.031	0.407667	4.061	1.2	2.633	2.63133	1.8069	6.45462	5.784	19.476	7.156	Ssa08022363,Belongs to the GRAS family,GRAS
Ssa06019243	1.57	1.988	9.704	4.42067	4.114	36.08	55.211	31.8017	39.649	12.195	27.135	26.3263	2.03	4.572	12.128	6.24333	3.367	1.64	1.983	2.33	7.19386	5.95529	0.373198	3.037	2.755	2.995	2.929	2.706	2.512	14.441	6.553	10.809	9.693	33.871	7.542	12.276	4.637	8.15167	4.987	5.398	5.513	5.29933	2.23728	0.650092	2.69	2.772	1.43	Ssa12007947,Zinc transporter,Zip
Ssa06017603	0.022	0.025	0.168	0.0716667	0	0.188	1.356	0.514667	0.209	0.07	0.102	0.127	0.05	0.075	0.175	0.1	0.29	0.041	0.074	0.135	7.1814	1.77209	1.35	0.059	0.075	0.114	0.0826667	0.339	0.36	0.328	0.342333	0.208	0.112	0.124	0.113	0.131	0.073	0.105667	0.181	0.212	0.061	0.151333	4.14113	1.43218	3.502	3.027	2.438	Ssa05016953,membrane protein At1g16860-like,-
Ssa09024388	0.019	0	0.08	0.033	0.032	0.161	0.516	0.236333	0.536	0.079	0.146	0.253667	0	0.232	0.216	0.149333	0	0	0	0	7.16162	7.68687	0	0	0.048	0.039	0.029	0.112	0.071	0.164	0.115667	0.039	0.115	0.445	0.368	0.168	0.145	0.227	0.29	0.886	0.555	0.577	3.98851	2.54185	3.305	2.154	1.931	Ssa06019399,Potassium channel,"Ank_2,Ion_trans,KHA,cNMP_binding"
Ssa03013173	0	0	0.089	0.0296667	0	0.022	0.615	0.212333	0.248	0.193	0.222	0.221	0.088	0.322	0.277	0.229	0.123	0.072	0	0.065	7.1573	7.44944	0.283843	0	0	0	0	0	0	0	0	0.137	0.134	0.059	0.027	0	0.663	0.23	0.081	0.056	0.024	0.0536667	#DIV/0!	0.233333	0	0	0	Ssa07019828,Exopolygalacturonase-like,Glyco_hydro_28
Ssa12006574	0.983	0.111	2.026	1.04	2.905	9.251	10.111	7.42233	18.521	15.193	9.748	14.4873	24.946	24.264	16.503	21.9043	3.829	3.205	1.108	2.714	7.13686	13.9301	0.123902	0	0.084	0	0.028	0	0	0	0	0.312	54.259	0	17.885	0	0.11	5.99833	1.734	11.898	0.366	4.666	0	0.777883	47.126	46.877	57.101	Ssa03012638,Belongs to the protein kinase superfamily,"Pkinase,Pkinase_Tyr"
Ssa03012756	0.028	0.032	0.109	0.0563333	0.111	0.318	0.77	0.399667	0.497	0.498	0.619	0.538	0.225	0.284	0.594	0.367667	0.161	0.185	0.112	0.152667	7.09467	9.5503	0.415231	0.141	0.061	0.045	0.0823333	0.051	0	0.089	0.0466667	0.975	1.124	0.289	0.883	0.582	0.173	0.546	0.103	0.092	0.132	0.109	0.566802	0.199634	222.442	144.664	190.07	Ssa01000070,At2g34160-like,Alba
Ssa01002824	0	0	7.263	2.421	0.487	2.419	48.215	17.0403	13.339	0.869	6.205	6.80433	0.116	2.36	7.369	3.28167	0.532	0.475	0.057	0.354667	7.03855	2.81055	0.108075	0	0	0	0	0	0	0	0	0	0	0	0.053	0	0.114	0.0556667	0	0	0.047	0.0156667	#DIV/0!	0.281437	0.085	0.631	0.36	Ssa09024317,Pentatricopeptide repeat-containing protein,PPR
Ssa10004634	0	0.091	0	0.0303333	0.21	0.348	0.08	0.212667	0	0.086	0.189	0.0916667	0	0.167	0.144	0.103667	0.077	0	0	0.0256667	7.01099	3.02198	0.247588	0.219	0.138	0.169	0.175333	0	0	0	0	0	0.083	0	0.084	0.727	0.629	0.48	0.084	0	0.075	0.053	0	0.110417	5.852	3.29	2.303	Ssa01000550,Ubiquitin homologues,ubiquitin
Ssa01001771	0	0.107	0.325	0.144	0.329	1.47	1.216	1.005	0.604	0.403	0.665	0.557333	0	0	0.084	0.028	0.09	0	0	0.03	6.97917	3.87037	1.07143	0	0	0	0	0	0	0	0	0	0.098	0	0	0	0	0	0	0	0	0	#DIV/0!	#DIV/0!	1.399	1.402	0.771	Ssa02010116,Glycosyltransferase,Exostosin
Ssa03013970	0.659	0.074	0.396	0.376333	0.515	2.901	4.43	2.61533	1.262	1.404	2.16	1.60867	0.225	2.004	2.294	1.50767	0.313	0.43	0.297	0.346667	6.94951	4.27458	0.229936	0	0	0	0	0	0.084	0.166	0.0833333	0.14	0	0	0	0	0.073	0.0243333	0	0	0	0	#DIV/0!	0	0.279	5.441	2.61	Ssa12007729,-,-
Ssa05016870	0.037	0.042	0.569	0.216	1.471	1.525	1.492	1.496	0.059	1.49	0.689	0.746	0.042	0.865	0	0.302333	2.446	1.542	1.285	1.75767	6.92593	3.4537	5.81367	0.033	0	0	0.011	0.132	0.234	0.231	0.199	0.156	0.683	0.125	0.076	0.074	0	0.05	0.038	0.04	0	0.026	18.0909	0.52	5.376	26.914	18.594	Ssa06018811,Protein RIK isoform X1,-
Ssa01002838	0	0	0.162	0.054	0.062	0.102	0.957	0.373667	0.075	1.359	2.12	1.18467	0.081	0	0	0.027	1.009	1.319	1.383	1.237	6.91975	21.9383	45.8148	0.021	0.142	0	0.0543333	0	0	0	0	0.025	0.877	0.08	0.049	0	0	0.0163333	0.147	0.077	0.022	0.082	0	5.02041	19.523	34.838	31.766	Ssa08022230,Neprosin,"Neprosin,Neprosin_AP"
Ssa08022740	0	0	0.286	0.0953333	0	0.183	1.795	0.659333	0.048	0.129	0.189	0.122	0	0.105	0.189	0.098	0.115	0.113	0.034	0.0873333	6.91608	1.27972	0.891156	0.164	0.13	0.032	0.108667	0.181	0.077	0.038	0.0986667	0.128	0.094	0.103	0	0.03	0.034	0.0213333	0.031	0.098	0.113	0.0806667	0.907975	3.78125	0.314	0.154	0.397	Ssa11006268,Belongs to the disease resistance NB-LRR family,NB-ARC
Ssa03012786	0	0	0.023	0.00766667	0	0.024	0.135	0.053	0.087	0.058	0	0.0483333	0.031	0	0	0.0103333	0	0	0	0	6.91304	6.30435	0	0	0	0	0	0	0	0	0	0	1.293	0.031	0.057	0.027	0	0.028	0	0.059	0	0.0196667	#DIV/0!	0.702381	197.133	222.815	272.944	Ssa12006730,Heavy-metal-associated domain,HMA
Ssa07020941	0	0	0.103	0.0343333	0.279	0.311	0.119	0.236333	0.256	0.043	0.031	0.11	0.319	0.277	0.107	0.234333	0	0.149	0	0.0496667	6.8835	3.20388	0.211949	0	0	0	0	0	0	0	0	0	0.083	0	0	0	0	0	0	0	0	0	#DIV/0!	#DIV/0!	10.19	22.874	19.28	Ssa02011337,Chaperone protein DNAj,"DnaJ,DnaJ_C,DnaJ_CXXCXGXG"
Ssa08022068	0	0.036	0	0.012	0	0.056	0.191	0.0823333	0.155	0	0	0.0516667	0.037	0.022	0.029	0.0293333	0.092	0	0.073	0.055	6.86111	4.30556	1.875	0.029	0	0	0.00966667	0	0	0	0	0.034	0.1	0	0.034	0	0.18	0.0713333	0	0	0	0	0	0	7.998	11.882	8.393	Ssa11005160,DNA-binding protein,DUF296
Ssa02011546	0	0.036	0	0.012	0	0.056	0.191	0.0823333	0.155	0	0	0.0516667	0.037	0.022	0.029	0.0293333	0.092	0	0.073	0.055	6.86111	4.30556	1.875	0.029	0	0	0.00966667	0	0	0	0	0.034	0.1	0	0.034	0	0.18	0.0713333	0	0	0	0	0	0	3.066	2.148	2.862	Ssa01000223,PsbP domain-containing protein 1,PsbP
Ssa10003957	0.027	0	0.07	0.0323333	0.047	0	0.617	0.221333	0.087	0.434	0.445	0.322	0.031	0.019	0.073	0.041	0.361	0.025	0.061	0.149	6.84536	9.95876	3.63415	0	0	0.114	0.038	0	0.069	0.034	0.0343333	0.201	1.063	0.123	0.085	0.027	0.151	0.0876667	0.056	0.088	0.025	0.0563333	0.903509	0.642586	1.985	3.379	5.185	Ssa07020251,subtilisin-like protease,"Inhibitor_I9,PA,Peptidase_S8"
Ssa05015966	0	0	0.145	0.0483333	0	0.073	0.919	0.330667	1.214	0.36	0.198	0.590667	0.096	0	0	0.032	0	0	0	0	6.84138	12.2207	0	0.382	0.217	0.266	0.288333	0	0	0	0	3.22	2.091	1.055	0	0	0.282	0.094	0.964	0.548	0.472	0.661333	0	7.03546	0.245	0.195	0.186	Ssa02011183,Cytochrome p450,p450
Ssa08022693	3.091	0.771	7.163	3.675	18.185	33.365	23.822	25.124	2.698	5.825	6.709	5.07733	2.905	1.491	1.766	2.054	44.669	15.304	5.752	21.9083	6.83646	1.38159	10.6662	0.195	0.123	0.075	0.131	0	0.32	0.045	0.121667	2.209	2.374	3.388	0.486	0.252	0.28	0.339333	4.739	2.448	2.777	3.32133	0.928753	9.78782	0.051	0.041	0.047	Ssa10003854,Auxin-induced protein 5NG4,EamA
Ssa08022289	0.032	0	0	0.0106667	0	0.028	0.19	0.0726667	0.051	0.137	0	0.0626667	0.037	0	0.029	0.022	0	0	0	0	6.8125	5.875	0	0	0	0	0	0	0	0	0	0	0	0	0	0	0	0	0	0	0	0	#DIV/0!	#DIV/0!	8.384	7.997	7.394	Ssa06018752,Protein of unknown function (DUF1666),DUF1666
Ssa02011321	0.032	0	0	0.0106667	0	0.028	0.19	0.0726667	0.051	0.137	0	0.0626667	0.037	0	0.029	0.022	0	0	0	0	6.8125	5.875	0	0	0	0	0	0	0	0	0	0	0	0	0	0	0	0	0	0	0	0	#DIV/0!	#DIV/0!	63.837	97.148	249.073	Ssa02010565,-,-
Ssa11006295	0	0	0.058	0.0193333	0	0.059	0.336	0.131667	0	0.217	0.212	0.143	0	0.047	0	0.0156667	0	0	0	0	6.81034	7.39655	0	0	0	0	0	0	0	0	0	0	0	0	0	0	0	0	0	0	0	0	#DIV/0!	#DIV/0!	904.405	1434.77	942.566	Ssa09024859,Belongs to the MIP aquaporin (TC 1.A.8) family,MIP
Ssa12006857	0.052	0.175	0.489	0.238667	0.18	0.939	3.738	1.619	2.563	0.386	1.334	1.42767	0.648	0.716	1.156	0.84	0.689	0.241	0.175	0.368333	6.78352	5.98184	0.438492	0.234	0	0.109	0.114333	0.124	0.198	0.521	0.281	0.165	0.534	0.764	1.238	0.934	3.403	1.85833	0.054	0.224	0.241	0.173	2.45773	0.0930942	32.698	25.377	33.341	Ssa01000405,Alkylated DNA repair protein,2OG-FeII_Oxy_2
Ssa03013994	0.033	0.037	0.113	0.061	0.258	0.656	0.327	0.413667	0.422	0.458	0.851	0.577	0.526	0.297	0.206	0.343	0.439	0.123	0.223	0.261667	6.78142	9.45902	0.762877	0.09	0.085	0.277	0.150667	0.04	0	0.042	0.0273333	0.175	0.204	0.3	0.652	0.563	0.294	0.503	0.206	0.178	0.215	0.199667	0.181416	0.396952	0	0.035	0	Ssa01002171,Isoflavonoid malonyl transferase,Transferase
Ssa01002369	0.125	0	0.107	0.0773333	0.65	0.43	0.493	0.524333	0.796	0.133	0.486	0.471667	0.142	0.172	0.111	0.141667	0	0.348	0	0.116	6.78017	6.09914	0.818824	0	0.321	0	0.107	0.298	0	0.313	0.203667	0	0	0.283	0.13	0.375	0.139	0.214667	1.422	0.404	1.16	0.995333	1.90343	4.63665	60.833	58.216	78.889	Ssa03013048,Belongs to the protein kinase superfamily,Pkinase
Ssa12007862	0.103	0.039	0.918	0.353333	0.06	0.298	6.819	2.39233	0.771	0.698	0.969	0.812667	0.432	0.453	0.339	0.408	0.262	0.706	0.35	0.439333	6.77075	2.3	1.0768	0.031	0	0	0.0103333	0	0	0.043	0.0143333	0.037	0.071	0	0.538	0.104	0.038	0.226667	0.179	0.149	0.321	0.216333	1.3871	0.954412	0	0.054	0	Ssa01002668,Nodulin-like,"MFS_1,Nodulin-like"
Ssa08022852	0	0	0.091	0.0303333	0.398	0.183	0.035	0.205333	0	0.113	0.165	0.0926667	0.281	0.049	0.157	0.162333	0	0.23	0.357	0.195667	6.76923	3.05495	1.20534	0	0	0	0	0.084	0.045	0	0.043	0.037	0	0.08	0	0	0	0	0	0	0	0	#DIV/0!	#DIV/0!	10.791	25.441	29.94	Ssa02011267,Basic region leucine zipper,bZIP_2
Ssa07019854	0	0.125	0.064	0.063	0.032	0	1.244	0.425333	0	1.815	2.052	1.289	0	0.026	0	0.00866667	0.281	0.069	0.709	0.353	6.75132	20.4603	40.7308	0.067	0	0.194	0.087	0	0	0.047	0.0156667	0	0.42	0.126	0.038	0	0	0.0126667	1.306	0.08	0.379	0.588333	0.180077	46.4474	111.991	80.127	105.151	Ssa03012960,Belongs to the heat shock protein 70 family,HSP70
Ssa08023142	0.055	0	0.423	0.159333	0.048	0.236	2.922	1.06867	0.087	0.525	0.555	0.389	0	0.038	0	0.0126667	0.883	0.662	0.616	0.720333	6.70711	2.44142	56.8684	0.149	0.047	0	0.0653333	0.066	0	0	0.022	0	0.734	0.062	0.114	0	0	0.038	0.114	0	0.255	0.123	0.336735	3.23684	1.302	5.045	3.368	Ssa02010717,LRR receptor-like serine threonine-protein kinase,"LRRNT_2,LRR_1,LRR_8,Pkinase_Tyr"
Ssa12007258	9.15	6.137	42.981	19.4227	128.252	144.429	117.936	130.206	58.444	60.963	97.802	72.403	18.55	11.072	19.408	16.3433	175.216	71.922	37.056	94.7313	6.7038	3.72776	5.79633	0.259	0.245	0.3	0.268	0	0.728	0.359	0.362333	0.606	2.95	0.974	0.595	0.86	0	0.485	0.297	0.309	0.799	0.468333	1.35199	0.965636	66.69	39.423	41.538	Ssa07019903,Belongs to the cytochrome b5 family,Cyt-b5
Ssa01000799	0.031	0.103	0.105	0.0796667	0.451	0.817	0.332	0.533333	0.049	0.293	0.286	0.209333	0.174	0.169	0.109	0.150667	0.203	0.37	0.172	0.248333	6.69456	2.62762	1.64823	0	0	0	0	0	0	0.077	0.0256667	0.291	0.189	0.139	0.064	0.092	0.136	0.0973333	0.095	0	0.028	0.041	#DIV/0!	0.421233	0.47	0	0.286	Ssa08022360,Plant lipid transfer protein / seed storage protein / trypsin-alpha amylase inhibitor domain family,LTP_2
Ssa04014605	0	0	0.044	0.0146667	0.045	0.045	0.204	0.098	0.247	0.055	0.201	0.167667	0.411	0.107	0	0.172667	0.49	0.48	0.232	0.400667	6.68182	11.4318	2.32046	0	0	0	0	0	0	0.065	0.0216667	0	0	0	0.054	0	0	0.018	0	0	0	0	#DIV/0!	0	0.751	0.599	0.912	Ssa11006338,-,-
Ssa11005624	0.286	0.377	2.579	1.08067	0.663	8.765	12.208	7.212	20.851	1.118	4.54	8.83633	4.014	2.076	1.745	2.61167	0.317	0.178	0.376	0.290333	6.67366	8.17674	0.111168	0	0	0	0	0	0.061	0	0.0203333	0	0.098	0	0	0	0	0	0	0	0	0	#DIV/0!	#DIV/0!	1.898	4.527	3.334	Ssa02009585,Belongs to the UDP-glycosyltransferase family,UDPGT
Ssa08023652	0.02	0	0.439	0.153	0.051	0.424	2.586	1.02033	0.722	0.084	0.261	0.355667	0	0.231	0.316	0.182333	0.075	0.055	0	0.0433333	6.66885	2.32462	0.23766	0	0	0	0	0	0.025	0	0.00833333	0	0	0	0.041	0	0.263	0.101333	0.041	0.021	0.018	0.0266667	#DIV/0!	0.263158	47.094	22.53	10.599	Ssa05016950,-,-
Ssa03013280	0	0	0.068	0.0226667	0.034	0.068	0.351	0.151	0.189	0.084	0.185	0.152667	0	0	0.211	0.0703333	0.037	0.073	0	0.0366667	6.66176	6.73529	0.521327	0	0.034	0	0.0113333	0	0.05	0	0.0166667	0	0.081	0	0	0.04	0	0.0133333	0	0	0.037	0.0123333	1.47059	0.925	0	0.067	0	Ssa11005042,caffeoyl-CoA O-methyltransferase,Methyltransf_3
Ssa09024595	4.77	4.036	2.598	3.80133	34.398	39.219	2.301	25.306	1.831	3.721	5.905	3.819	15.832	24.157	15.852	18.6137	255.128	151.701	105.895	170.908	6.65714	1.00465	9.18186	0.181	0.185	0.14	0.168667	0	0.783	0.021	0.268	0.018	0.223	0.302	0.691	0.583	0.259	0.511	2.415	5.658	9.762	5.945	1.58893	11.6341	31.696	23.194	33.029	Ssa06017424,-,-
Ssa13008390	0.161	0.151	0.299	0.203667	1.955	1.179	0.927	1.35367	0.812	0.799	0.69	0.767	0.518	0.481	0.406	0.468333	0.738	0.374	0.332	0.481333	6.64648	3.76596	1.02776	0.267	0.184	0.14	0.197	0.256	0.579	0.337	0.390667	0.199	0.884	0.182	0.39	0.107	0.209	0.235333	0.417	0.116	0.249	0.260667	1.98308	1.10765	1.401	0	0	Ssa11005928,-,-
Ssa08023091	0	0.015	0	0.005	0.012	0.034	0.053	0.033	0	0.113	0.052	0.055	0	0	0.012	0.004	0.013	0.025	0	0.0126667	6.6	11	3.16667	0	0	0	0	0.032	0	0	0.0106667	0	0.068	0	0	0.013	0.015	0.00933333	0.014	0.014	0.012	0.0133333	#DIV/0!	1.42857	16.479	10.347	11.526	Ssa13009158,B3 domain-containing,"B3,zf-CW"
Ssa04015087	0	0.056	0.084	0.0466667	0.085	0.255	0.583	0.307667	0.235	0.314	0.23	0.259667	0	0.102	0.307	0.136333	0	0	0	0	6.59286	5.56429	0	0	0.042	0	0.014	0	0	0	0	0	0	0.391	0.255	0	0	0.085	0.153	0.956	0.823	0.644	0	7.57647	97.857	84.417	113.263	Ssa11005800,Ran guanine nucleotide release,Mog1
Ssa05016496	0	0	0.065	0.0216667	0	0	0.428	0.142667	0.09	0.1	0.191	0.127	0	0.039	0	0.013	0.179	0.018	0	0.0656667	6.58462	5.86154	5.05128	0	0.016	0	0.00533333	0	0	0	0	0.04	0.194	0.021	0.02	0	0	0.00666667	0.02	0	0.053	0.0243333	0	3.65	0	0.024	0	Ssa11006456,metal-nicotianamine transporter,OPT
Ssa08022565	0	0.037	0	0.0123333	0	0.113	0.13	0.081	0	0.14	0.077	0.0723333	0.112	0.068	0	0.06	0.031	0	0	0.0103333	6.56757	5.86486	0.172222	0	0	0	0	0	0	0	0	0	0	0	0	0	0	0	0	0	0	0	#DIV/0!	#DIV/0!	23.197	22.335	22.238	Ssa02010071,Pentatricopeptide repeat-containing protein,"PPR,PPR_1,PPR_2,PPR_3"
Ssa11005999	0	0	0.037	0.0123333	0	0.074	0.169	0.081	0	0	0	0	0	0	0.038	0.0126667	0.041	0	0	0.0136667	6.56757	0	1.07895	0	0	0	0	0	0	0	0	0	0	0	0	0	0	0	0	0	0	0	#DIV/0!	#DIV/0!	1.318	1.314	0.9	Ssa02010551,Belongs to the NPH3 family,"BTB,NPH3"
Ssa13008297	0.493	0.315	1.436	0.748	7.694	4.904	2.12	4.906	1.609	10.51	11.532	7.88367	10.148	7.366	9.092	8.86867	18.428	25.098	15.579	19.7017	6.55882	10.5397	2.22149	0.679	0.331	0.315	0.441667	0.231	0.109	0.431	0.257	0.409	3.87	4.479	0.401	0.258	0.406	0.355	3.471	3.567	3.053	3.36367	0.581887	9.47512	14.872	18.228	20.522	Ssa01002589,Splicing factor 3B subunit,RRM_1
Ssa12007681	0.148	0	1.07	0.406	0.155	0.026	7.807	2.66267	0.9	0	0.463	0.454333	0	0.39	0.027	0.139	3.496	0.166	0.736	1.466	6.55829	1.11905	10.5468	3.681	2.749	2.18	2.87	0.426	0.151	0.56	0.379	0.314	0.092	0.303	0.524	0.535	0.165	0.408	1.109	2.63	2.21	1.983	0.132056	4.86029	2.31	0.809	0.616	Ssa07021014,Belongs to the cyclin family,"Cyclin_C,Cyclin_N"
Ssa05017331	35.848	14.822	99.236	49.9687	608.079	308.021	66.77	327.623	319.5	206.082	193.857	239.813	1063.46	359.59	274.621	565.89	119.27	74.608	52.596	82.158	6.55658	4.79927	0.145184	0	0	0	0	0	10.159	0	3.38633	0	11.725	0	0	0.136	0	0.0453333	0	0	0	0	#DIV/0!	0	16.557	3.557	6.382	Ssa08022484,-,-
Ssa07021524	0.172	0	0.344	0.172	1.491	1.778	0.113	1.12733	0.913	6.706	11.165	6.26133	0.195	0.198	0.102	0.165	0.272	0.107	0.064	0.147667	6.55426	36.4031	0.894949	0	0.049	0	0.0163333	0	0	0	0	0.061	2.006	0	0	0	0	0	0.178	0	0.106	0.0946667	0	#DIV/0!	4.405	2.14	3.964	Ssa07020335,LRR receptor-like serine threonine-protein kinase,"LRR_1,LRR_8,Malectin,Pkinase,Pkinase_Tyr"
Ssa02011227	1.546	0	837.065	279.537	49.183	1165.51	4280.02	1831.57	507.98	65.411	477.467	350.286	7.44	690.44	453.651	383.844	3.205	13.554	0.079	5.61267	6.55215	1.25309	0.0146223	0.064	0.06	0.074	0.066	0	0.089	0.265	0.118	2.234	30.532	835.766	68.842	28.883	8.536	35.4203	689.464	2318.63	922.189	1310.09	1.78788	36.987	27.697	57.429	50.115	Ssa06019145,Splicing factor 3B subunit,"DUF382,PSP"
Ssa05017117	0.127	0.024	0.254	0.135	0.092	0.346	2.213	0.883667	0.539	0.653	1.072	0.754667	0.072	0.628	0.999	0.566333	0.201	0.02	0.119	0.113333	6.54568	5.59012	0.200118	0.019	0	0.066	0.0283333	0	0	0	0	0.022	0	0.048	0.132	0	0.212	0.114667	0.263	0.091	0.079	0.144333	0	1.25872	63.927	36.355	25.591	Ssa03013922,lag1 longevity assurance homolog,TRAM_LAG1_CLN8
Ssa12007062	0.149	0.225	0.683	0.352333	3.199	2.19	1.525	2.30467	0.079	5.248	1.709	2.34533	0.396	0.309	0.489	0.398	1.701	0.88	0.897	1.15933	6.54115	6.65658	2.9129	0.946	0.512	0.626	0.694667	0.357	0.57	3.001	1.30933	14.645	13.084	92.283	18.717	14.504	10.084	14.435	9.395	1.989	3.935	5.10633	1.88484	0.353747	27.257	24.583	27.333	Ssa08023322,Malate dehydrogenase,"Ldh_1_C,Ldh_1_N"
Ssa11005280	0	0	0.139	0.0463333	0.071	0.035	0.803	0.303	0.972	0.303	0.254	0.509667	0.323	0.309	0.362	0.331333	0.848	0.681	1.326	0.951667	6.53957	11	2.87223	0.367	0.348	0.085	0.266667	0.097	0.103	0.102	0.100667	0.516	0.335	1.383	0.802	0.773	3.03	1.535	0.885	1.009	1.322	1.072	0.3775	0.698371	24.774	27.748	18.78	Ssa11006144,Trihelix transcription factor,Myb_DNA-bind_4
Ssa06017626	0	0.302	0.115	0.139	0.116	0.347	2.251	0.904667	0	0	0.105	0.035	0.305	0	0	0.101667	0	0	0	0	6.50839	0.251799	0	0	0	0	0	0	0	0	0	0	0	0	0	0	0	0	0	0	0	0	#DIV/0!	#DIV/0!	8.079	7.961	8.648	Ssa13008924,RNA pseudourine synthase 3,PseudoU_synth_2
Ssa11005918	0.322	0.045	0.345	0.237333	0.804	2.117	1.71	1.54367	4.557	0.857	2.543	2.65233	3.34	1.584	2.8	2.57467	1.222	0.599	0.317	0.712667	6.50421	11.1756	0.2768	0	0.138	0.042	0.06	0.048	0.051	0.051	0.05	0.17	0.332	0.32	0.084	0.04	0	0.0413333	0.042	0.174	0.112	0.109333	0.833333	2.64516	0	0	0	Ssa06018033,Indole-3-acetic acid-induced protein,Auxin_inducible
Ssa11006407	0	0.287	0.109	0.132	0.994	0.439	1.131	0.854667	0.203	0.677	0.893	0.591	0.289	0.703	0	0.330667	0.241	0.118	0.143	0.167333	6.47475	4.47727	0.506048	0.23	0.218	0	0.149333	0	0	0.16	0.0533333	0.404	0.131	0	0.132	0.255	0.283	0.223333	0.528	0.275	0.591	0.464667	0.357143	2.0806	4.017	4.579	5.833	Ssa02011392,-,-
Ssa07020999	0	0	0.112	0.0373333	0	0.08	0.644	0.241333	0.386	0.079	0.174	0.213	0.275	0.142	0.233	0.216667	0.177	0.069	0.063	0.103	6.46429	5.70536	0.475385	0	0	0	0	0	0	0	0	0	0	0	0	0	0	0	0	0	0	0	#DIV/0!	#DIV/0!	26.97	55.663	61.899	Ssa09023917,RNA recognition motif,RRM_1
Ssa13009085	0	0	0.026	0.00866667	0.107	0	0.061	0.056	0.049	0.066	0.144	0.0863333	0	0	0.303	0.101	0	0	0	0	6.46154	9.96154	0	0	0	0	0	0	0	0	0	0	0	0.63	0	0.031	0.206	0.079	0	0	0	0	#DIV/0!	0	7.136	7.112	8.97	Ssa07021567,HPC2 and ubinuclein domain,HUN
Ssa01001486	0.035	0	0.301	0.112	0.579	0.787	0.797	0.721	0.56	0.56	0.547	0.555667	2.034	1.866	1.565	1.82167	0.832	0.62	0.316	0.589333	6.4375	4.96131	0.323513	0	0	0	0	0.042	0.089	0	0.0436667	2.153	1.446	0.119	0.328	0.035	0.312	0.225	0.109	0.189	0.065	0.121	#DIV/0!	0.537778	0.218	0.261	0.265	Ssa05017283,Phosphatidylinositol phosphatidylcholine transfer protein,"CRAL_TRIO,CRAL_TRIO_N"
Ssa05017047	7.616	6.749	20.71	11.6917	111.52	89.193	24.805	75.1727	18.478	21.665	21.818	20.6537	27.68	9.194	8.606	15.16	62.842	42.453	17.497	40.9307	6.42959	1.76653	2.69991	0.191	0.108	0.044	0.114333	0	2.624	0	0.874667	0.089	3.517	0.096	0	0.042	0.094	0.0453333	2.402	2.41	3.799	2.87033	7.65015	63.3162	79.335	96.242	102.399	Ssa11004976,E3 ubiquitin-protein ligase,"zf-C3HC4,zf-C3HC4_2,zf-C3HC4_3"
Ssa12007111	0.848	0	1.821	0.889667	2.826	4.394	9.927	5.71567	25.282	0.904	0.221	8.80233	2.413	1.271	0.631	1.43833	1.343	2.502	0.956	1.60033	6.4245	9.89397	1.11263	0	0	0	0	0	0	0	0	0	0	0	0	0.142	0	0.0473333	0	0	0	0	#DIV/0!	0	60.762	54.286	69.959	Ssa08023846,receptor-like protein kinase,Pkinase_Tyr
Ssa04014306	0	0	0.057	0.019	0.057	0.114	0.195	0.122	0.105	0	0.206	0.103667	0	0	0.059	0.0196667	0.25	0.061	0.223	0.178	6.42105	5.45614	9.05085	0.119	0.057	0	0.0586667	0.079	0	0	0.0263333	0	0.136	0.075	0.068	0	0	0.0226667	0	0	0.061	0.0203333	0.448864	0.897059	22.017	14.447	16.882	Ssa02012170,"Bifunctional DNA N-glycosylase with associated apurinic apyrimidinic (AP) lyase function that catalyzes the first step in base excision repair (BER), the primary repair pathway for the repair of oxidative DNA damage. The DNA N-glycosylase activity releases the damaged DNA base from DNA by cleaving the N- glycosidic bond, leaving an AP site. The AP lyase activity cleaves the phosphodi…
Ssa10004268	0	0	0.152	0.0506667	0.066	0.109	0.801	0.325333	0.121	0	0.158	0.093	0	0.718	0	0.239333	0	0.118	0.086	0.068	6.42105	1.83553	0.284123	0	0	0	0	0	0	0.032	0.0106667	0	0	0	0	0	0	0	0	0	0	0	#DIV/0!	#DIV/0!	20.031	22.689	29.576	Ssa07021102,"RNA recognition motif. (a.k.a. RRM, RBD, or RNP domain)",RRM_1
Ssa02010775	0	0	0.076	0.0253333	0.153	0.095	0.24	0.162667	0.282	0.212	0.465	0.319667	0	0.076	0.572	0.216	0.105	0.041	0	0.0486667	6.42105	12.6184	0.225309	0.02	0.057	0	0.0256667	0.899	0.983	0.527	0.803	1.73	1.253	3.66	0.459	0.243	2.115	0.939	0.985	1.765	1.726	1.492	31.2857	1.58892	1.438	2.529	0.995	Ssa07021715,SET and MYND domain-containing protein,"SET,TPR_8,zf-MYND"
Ssa08022383	1.617	0	835.254	278.957	49.06	1128	4182.34	1786.47	507.419	65.411	471.155	347.995	7.44	688.593	451.077	382.37	3.072	13.554	0.079	5.56833	6.40409	1.24749	0.0145627	0.064	0.06	0.074	0.066	0	0.089	0.265	0.118	2.308	30.46	833.451	68.769	29.024	8.458	35.417	688.515	2279.28	898.766	1288.85	1.78788	36.3908	0.611	0.625	0.3	Ssa01002016,TMV resistance protein N-like,"NB-ARC,TIR"
Ssa06019459	0	0	0.509	0.169667	0	0.108	3.15	1.086	0.399	0	0.073	0.157333	0	0.151	0.028	0.0596667	0.03	0	0	0.01	6.40079	0.927308	0.167598	0	0	0	0	0	0	0	0	0	0	0	0	0	0	0	0	0	0	0	#DIV/0!	#DIV/0!	4.319	7.117	6.828	Ssa13008240,Belongs to the class V-like SAM-binding methyltransferase superfamily. Histone-lysine methyltransferase family. TRX MLL subfamily,"PHD,PHD_2,PWWP,SAND,SET,zf-HC5HC2H_2"
Ssa02009884	39.466	20.948	66.921	42.445	284.99	279.302	250.357	271.55	717.445	283.687	284.922	428.685	728.893	325.661	401.171	485.242	266.723	358.215	350.67	325.203	6.39768	10.0998	0.670187	163.458	315.856	368.615	282.643	3421.98	3593.57	5244.4	4086.65	1720.31	1366.91	4438.58	2030.68	2508.65	1838.33	2125.89	1844.51	1245.83	1575.05	1555.13	14.4587	0.73152	5.567	6.483	12.475	Ssa05017167,RING-type E3 ubiquitin transferase,U-box
Ssa09024193	0	0	0.07	0.0233333	0	0	0.446	0.148667	0.131	0	0.064	0.065	0	0	0	0	0.156	0	0.092	0.0826667	6.37143	2.78571	#DIV/0!	0	0	0	0	0	0	0	0	0	0	0	0	0	0	0	0	0	0	0	#DIV/0!	#DIV/0!	0.428	2.422	1.667	Ssa07020265,transcription factor,HLH
Ssa11006260	0.286	0	0.655	0.313667	0.58	2.963	2.451	1.998	4.414	0.914	1.712	2.34667	0.759	0.395	0.426	0.526667	0.634	0.178	0.752	0.521333	6.36982	7.4814	0.989873	0.604	1.063	0.9	0.855667	1.484	2.305	2.157	1.982	0.303	0.295	1.191	0.595	0.573	0.956	0.708	0.396	0.721	1.065	0.727333	2.31632	1.02731	30.73	26.217	23.723	Ssa10004677,inactive poly ADP-ribose polymerase,"PARP,RST"
Ssa04014976	1.003	1.236	1.331	1.19	9.589	7.085	6.042	7.572	3.203	3.11	2.777	3.03	10.169	1.954	1.71	4.611	2.425	3.058	2.26	2.581	6.36303	2.54622	0.559748	0	0.078	0	0.026	0	0	0.115	0.0383333	0	0.094	0.207	0.284	0.64	0.406	0.443333	0.095	0.099	0.17	0.121333	1.47436	0.273684	15.831	31.935	28.989	Ssa04014714,"RNA-binding component of the eukaryotic translation initiation factor 3 (eIF-3) complex, which is involved in protein synthesis of a specialized repertoire of mRNAs and, together with other initiation factors, stimulates binding of mRNA and methionyl-tRNAi to the 40S ribosome. The eIF-3 complex specifically targets and initiates translation of a subset of mRNAs involved in cell proli…
Ssa01000887	0.531	0.183	2.459	1.05767	0.341	3.269	16.554	6.72133	12.57	2.338	5.012	6.64	0.631	3.64	6.309	3.52667	0.154	0.43	0.026	0.203333	6.35487	6.27797	0.057656	1.15	1.268	1.381	1.26633	0.857	1.117	0.58	0.851333	1.296	1.048	0.131	0.696	0.764	1.466	0.975333	0.072	0.225	0.172	0.156333	0.672282	0.160287	1.673	4.755	3.81	Ssa10004140,Plant lipid transfer protein / seed storage protein / trypsin-alpha amylase inhibitor domain family,LTP_2
Ssa01001972	0.017	0.02	0.059	0.032	0.285	0.134	0.188	0.202333	0.055	0.092	0.081	0.076	0.02	0.155	0.262	0.145667	0	0	0	0	6.32292	2.375	0	0.016	0.03	0.036	0.0273333	0.248	0.396	0.196	0.28	0.183	0.25	0.059	0.359	0.364	0.039	0.254	0.108	0.149	0.129	0.128667	10.2439	0.506562	7.314	10.539	10.792	Ssa08021948,Mpv17 / PMP22 family,Mpv17_PMP22
Ssa04015672	0	0	0.264	0.088	0.076	0.379	1.214	0.556333	0.42	0.047	0.513	0.326667	0.05	0.061	0.979	0.363333	0.083	0.163	0.049	0.0983333	6.32197	3.71212	0.270642	0	0	0	0	0	0	0	0	0	0	0	0	0	0	0	0	0	0	0	#DIV/0!	#DIV/0!	7.567	9.26	5.264	Ssa04015598,Belongs to the 'GDSL' lipolytic enzyme family,Lipase_GDSL
Ssa06019582	1.003	1.236	1.331	1.19	9.431	7.085	5.861	7.459	3.057	3.013	2.634	2.90133	9.857	1.954	1.71	4.507	2.339	3.058	2.055	2.484	6.26807	2.4381	0.551143	0	0.078	0	0.026	0	0	0.115	0.0383333	0	0.094	0.207	0.284	0.64	0.406	0.443333	0.095	0.099	0.17	0.121333	1.47436	0.273684	1.282	1.48	1.322	Ssa01001804,Protein of unknown function (DUF1666),DUF1666
Ssa04014590	0	0.151	0.321	0.157333	0.023	0.299	2.636	0.986	1.107	0.085	1.811	1.001	0	0.092	0.167	0.0863333	0.025	0.074	0	0.033	6.26695	6.36229	0.382239	0.097	0.023	0.112	0.0773333	0	0	0	0	0.452	0.303	0.091	1.968	0.321	0.059	0.782667	0.028	0.058	0.025	0.037	0	0.0472743	64.437	52.487	22.915	Ssa04015310,"The coatomer is a cytosolic protein complex that binds to dilysine motifs and reversibly associates with Golgi non- clathrin-coated vesicles, which further mediate biosynthetic protein transport from the ER, via the Golgi up to the trans Golgi network. Coatomer complex is required for budding from Golgi membranes, and is essential for the retrograde Golgi-to-ER transport of dilysine-…
Ssa01002056	37.433	24.134	77.656	46.4077	267.497	296.467	308.44	290.801	391.654	265.697	319.843	325.731	338.231	353.79	480.157	390.726	221.23	320.773	288.386	276.796	6.26623	7.01891	0.708415	148.179	295.937	392.993	279.036	1990.39	1849.45	4141.52	2660.45	1638.84	1505.59	3476.6	2315.51	2503.51	1618.71	2145.91	1666.42	1186.03	1730.98	1527.81	9.53443	0.711963	4.515	10.107	6.872	Ssa09025846,Leishmanolysin-like,"EGF_2,Peptidase_M8"
Ssa05016914	2.796	1.79	8.165	4.25033	43.421	17.622	18.804	26.6157	56.253	15.001	18.776	30.01	41.684	14.048	18.56	24.764	15.406	20.402	27.306	21.038	6.26202	7.06062	0.84954	0	0	0	0	0	0	0	0	0	0	0	0	0	0	0	0	0	0	0	#DIV/0!	#DIV/0!	0	0.135	0.031	Ssa01001248,Belongs to the NPH3 family,"BTB,NPH3"
Ssa09025706	0.148	0.334	0.191	0.224333	1.801	1.534	0.878	1.40433	6.263	1.262	3.236	3.587	7.833	2.712	0.991	3.84533	2.039	1.517	0.667	1.40767	6.26003	15.9896	0.366071	0.335	0.381	0.699	0.471667	1.507	1.79	2.14	1.81233	1.411	1.222	0.252	2.462	2.893	1.154	2.16967	0.307	0.24	0.482	0.343	3.8424	0.158089	7.418	8.636	10.271	Ssa09024957,Potassium transporter,K_trans
Ssa02009670	0.01	0.011	0.058	0.0263333	0.025	0.008	0.459	0.164	0.062	0.021	0.128	0.0703333	0.011	0.04	0.043	0.0313333	0.037	0.009	0.033	0.0263333	6.22785	2.67089	0.840426	0.07	0.083	0.152	0.101667	0.174	0.099	0.122	0.131667	0.092	0.03	0.011	0.201	0.058	0.054	0.104333	0.04	0.031	0.027	0.0326667	1.29508	0.313099	2334.11	919.4	1374.03	Ssa01000478,Glutaredoxin,Glutaredoxin
Ssa10003540	0.64	0.701	0.699	0.68	2.679	7.047	2.972	4.23267	1.486	9.733	9.704	6.97433	0.75	0.563	1.333	0.882	1.621	1.138	0.677	1.14533	6.22451	10.2564	1.29856	0.316	0.2	0.02	0.178667	0.046	0	0.024	0.0233333	1.314	11.601	0.66	0.403	0.233	0.13	0.255333	1.932	0.67	0.072	0.891333	0.130597	3.49086	1076.28	276.651	312.904	Ssa05016838,Belongs to the universal ribosomal protein uS11 family,Ribosomal_S11
Ssa06019285	0.289	0.109	0.496	0.298	0.46	1.786	3.284	1.84333	3.188	1.898	1.691	2.259	4.654	3.327	5.887	4.62267	3.474	4.729	3.497	3.9	6.18568	7.58054	0.843669	0	0	0	0	0	0	0	0	0	0	0	0	0	0	0	0	0	0	0	#DIV/0!	#DIV/0!	14.383	27.418	29.322	Ssa01000998,Colon cancer-associated protein Mic1-like,Mic1
Ssa05016680	0	0.05	0.264	0.104667	0.038	0.076	1.827	0.647	0.281	0	0	0.0936667	0	0.03	0.039	0.023	0.251	0	0	0.0836667	6.18153	0.894904	3.63768	0	0	0	0	0	0	0	0	0	0	0	0	0	4.019	1.33967	0.046	0	0	0.0153333	#DIV/0!	0.0114456	19.18	16.683	16.139	Ssa08022503,"nuclear-transcribed mRNA catabolic process, nonsense-mediated decay",MMR_HSR1
Ssa02011299	3.382	1.15	5.278	3.27	17.953	23.798	18.882	20.211	7.955	8.179	9.172	8.43533	6.249	3.746	3.54	4.51167	12.747	8.333	9.015	10.0317	6.18073	2.57961	2.22349	0.79	1.217	0.878	0.961667	0.566	0.555	1.28	0.800333	3.197	3.639	6.36	1.777	1.057	2.066	1.63333	1.661	1.886	1.794	1.78033	0.832236	1.09	0	0	0	Ssa12006782,DNA-binding domain in plant proteins such as APETALA2 and EREBPs,AP2
Ssa03012905	0	0	0.072	0.024	0	0.072	0.373	0.148333	0.134	0.358	0.262	0.251333	0.048	0.174	0.112	0.111333	0.239	0.039	0.142	0.14	6.18056	10.4722	1.25749	0	0.036	0	0.012	0	0	0.053	0.0176667	3.154	1.644	2.762	8.067	0.715	8.364	5.71533	6.138	2.719	1.991	3.616	1.47222	0.632684	17.426	7.463	12.609	Ssa05016310,Belongs to the CRISP family,CAP
Ssa11005919	95.928	24.158	83.076	67.7207	571.829	475.124	208.284	418.412	160.471	74.268	84.74	106.493	383.751	198.898	242.42	275.023	280.142	285.542	100.841	222.175	6.1785	1.57253	0.807842	0	0	0.33	0.11	0	4.804	0.395	1.733	0.833	5.355	1.607	0.164	0	0.175	0.113	0.163	0.34	1.318	0.607	15.7545	5.37168	6.321	4.894	4.526	Ssa10004062,Protein of unknown function (DUF 659),"DUF659,Dimer_Tnp_hAT,zf-BED"
Ssa07020820	0.106	0	0.205	0.103667	0.184	0.549	1.179	0.637333	0.592	0.085	0.228	0.301667	0.271	0.183	0.378	0.277333	0.025	0.025	0.06	0.0366667	6.14791	2.90997	0.132212	0	0	0	0	0	0	0	0	0	0	0	0	0	0	0	0	0	0	0	#DIV/0!	#DIV/0!	16.494	9.456	7.57	Ssa06019629,PRKR-interacting protein,DUF1168
Ssa09025229	2.144	1.05	2.374	1.856	10.729	13.106	10.394	11.4097	2.473	4.699	4.838	4.00333	1.058	2.389	3.809	2.41867	0.634	0.755	0.349	0.579333	6.14745	2.15697	0.239526	0.324	0.491	0.675	0.496667	0.171	0.698	0.359	0.409333	0.278	1.475	0.189	0.297	0.191	0.186	0.224667	0.223	0.077	0.133	0.144333	0.824161	0.642433	4.708	9.69	2.797	Ssa03013529,Belongs to the DHHC palmitoyltransferase family,DHHC
Ssa12006668	0	0	0.225	0.075	0	0	1.383	0.461	0	0	0	0	0	0.03	0.078	0.036	0.166	0	0	0.0553333	6.14667	0	1.53704	0	0	0	0	0	0	0	0	0	0	0	0	0	3.358	1.11933	0	0.047	0	0.0156667	#DIV/0!	0.0139964	0.996	0.878	1.194	Ssa08022282,transcription factor,HLH
Ssa12006667	0	0.043	0.811	0.284667	0.066	0.163	5.008	1.74567	0.06	0.04	0.03	0.0433333	0.086	0.34	0.675	0.367	0.467	0	0.128	0.198333	6.13232	0.152225	0.540418	0	0.032	0.04	0.024	0	0	0.095	0.0316667	0	0	0	0.746	0.038	24.205	8.32967	0.039	0.204	0.141	0.128	1.31944	0.0153668	0	0	0	Ssa05016598,receptor-like protein kinase,"GUB_WAK_bind,Pkinase,Pkinase_Tyr"
Ssa04015027	0	0	0.278	0.0926667	0.022	0.151	1.528	0.567	0.637	0	0.097	0.244667	0	0.052	0.089	0.047	0	0.023	0	0.00766667	6.11871	2.64029	0.163121	0.113	0.021	0.052	0.062	0	0	0	0	0	0.026	0	0.389	0.15	0.139	0.226	0.026	0	0	0.00866667	0	0.0383481	1.092	0.634	0.362	Ssa09024669,Cysteine-rich receptor-like protein kinase,"Pkinase,Pkinase_Tyr,Stress-antifung"
Ssa04015700	0.012	0.027	0.093	0.044	0.052	0.28	0.475	0.269	0.153	0.269	0.291	0.237667	0	0.1	0.129	0.0763333	0.057	0.067	0	0.0413333	6.11364	5.40152	0.541485	0.087	0.093	0.063	0.081	0.072	0.061	0.03	0.0543333	0.051	0.124	0.095	0.05	0.06	0.08	0.0633333	0.062	0.026	0.022	0.0366667	0.670782	0.578947	0.795	1.446	0.362	Ssa09025322,Glutamate receptor,"ANF_receptor,Lig_chan,SBP_bac_3"
Ssa13008506	0	0.032	0.073	0.035	0	0.049	0.591	0.213333	0	0.364	0.689	0.351	0	0.02	0.025	0.015	0	0	0	0	6.09524	10.0286	0	0.155	0.024	0	0.0596667	0	0	0	0	0.03	0.382	0.065	0.059	0	0	0.0196667	0.355	0.615	1.351	0.773667	0	39.339	5.779	6.078	6.821	Ssa10003664,"Serine aminopeptidase, S33",Hydrolase_4
Ssa01000033	0	0.156	54.716	18.2907	2.043	64.104	267.583	111.243	55.579	2.579	16.519	24.8923	0.472	47.968	50.501	32.9803	0.066	0.386	0	0.150667	6.08197	1.36093	0.00456838	0.031	0.03	0.109	0.0566667	0	0	0	0	0.037	0.285	12.758	0.108	0	0.077	0.0616667	3.229	38.999	8.14	16.7893	0	272.259	2.606	1.3	2.127	Ssa07021652,Protein phosphatase 2C 57-like,PP2C
Ssa10004369	4.591	7.089	2.745	4.80833	29.045	31.837	26.814	29.232	19.255	32.926	30.065	27.4153	9.425	14.707	19.332	14.488	5.769	3.898	3.373	4.34667	6.07945	5.70163	0.300018	1.316	0.872	0.366	0.851333	40.085	34.948	13.735	29.5893	70.582	49.228	22.901	28.368	19.716	16.122	21.402	0.814	0.628	1.298	0.913333	34.7565	0.0426751	3.842	6.694	6.501	Ssa03013440,ELMO domain-containing protein,ELMO_CED12
Ssa11005687	0.057	0	0.049	0.0353333	0.099	0.148	0.396	0.214333	0.274	0.061	0.447	0.260667	0.13	0.119	0.306	0.185	0.163	0.107	0.064	0.111333	6.06604	7.37736	0.601802	0	0	0.06	0.02	0	0.073	0.072	0.0483333	0.061	0.413	0	0.119	0.057	0.064	0.08	0.059	0.062	0	0.0403333	2.41667	0.504167	15.708	12.702	12.668	Ssa11005293,21 kDa protein-like,PMEI
Ssa06017680	0.249	0.803	2.32	1.124	4.387	11.538	4.429	6.78467	3.859	1.023	2.109	2.33033	2.184	0.762	2.476	1.80733	3.68	2.682	1.842	2.73467	6.03618	2.07325	1.51309	0	0.03	0.037	0.0223333	0.085	0	0.179	0.088	0	0.11	0	0.148	0.036	0	0.0613333	0	0	0.033	0.011	3.9403	0.179348	19.724	17.281	17.048	Ssa09024588,May be involved in fusion of retrograde transport vesicles derived from an endocytic compartment with the Golgi complex,Got1
Ssa02009622	0.869	1.076	5.849	2.598	13.104	13.839	20.066	15.6697	7.025	8.155	8.009	7.72967	5.549	4.321	6.381	5.417	8.918	6.03	3.758	6.23533	6.03143	2.97524	1.15107	7.257	9.736	5.705	7.566	5.604	3.745	23.461	10.9367	14.664	12.808	22.817	37.759	57.769	19.075	38.201	29.173	19.745	22.614	23.844	1.4455	0.624172	15.526	5.607	6.525	Ssa06019139,Bifunctional epoxide hydrolase 2-like,"Abhydrolase_1,Abhydrolase_6"
Ssa10003943	0.67	0.505	0.192	0.455667	1.812	2.957	3.461	2.74333	0	4.127	3.663	2.59667	0.169	3.912	3.856	2.64567	0.141	0	0	0.047	6.02048	5.69861	0.0177649	0.135	0.128	0	0.0876667	0	0.095	0	0.0316667	0	0.538	0	0.387	0.075	0.083	0.181667	0.077	0.161	0	0.0793333	0.361217	0.436697	4.342	0.693	3.165	Ssa07020349,-,-
Ssa01000267	2.107	9.865	2.125	4.699	41.409	34.303	9.152	28.288	1.219	4.72	6.486	4.14167	0.591	1.647	0.355	0.864333	1.857	3.072	2.374	2.43433	6.02	0.881393	2.81643	0.857	0.55	1.122	0.843	1.499	1.982	1.728	1.73633	1.068	6.176	0.59	0.445	0.337	0.204	0.328667	1.363	0.759	0.654	0.925333	2.05971	2.81542	5.382	68.703	39.462	Ssa12007216,Belongs to the DEFL family,Gamma-thionin
Ssa06017686	0	0.113	1.287	0.466667	1.823	6.38	0.198	2.80033	7.016	0.639	2.183	3.27933	0.227	0.069	0.268	0.188	0.569	0	0	0.189667	6.00071	7.02714	1.00887	0	0	0	0	0	0	0.126	0.042	1.058	1.339	0.34	0	0.1	0.111	0.0703333	0	0	0	0	#DIV/0!	0	0.125	0.4	0.171	Ssa10004814,-,-
Ssa10004649	0.057	0	0.097	0.0513333	0.148	0.44	0.336	0.308	0.362	1.329	2.301	1.33067	0	0.392	0.152	0.181333	0	0	0	0	6	25.9221	0	0.103	0.146	0.119	0.122667	0.204	0	0.071	0.0916667	1.141	3.392	0	0.295	0.17	0.189	0.218	0.059	0.184	0.053	0.0986667	0.747283	0.452599	10.249	5.297	6.343	Ssa01001164,Domain of unknown function (DUF296),"AT_hook,DUF296"
Ssa13009181	0.37	0.446	0.275	0.363667	4.353	0.32	1.83	2.16767	0.118	1.42	3.872	1.80333	0.253	0.29	9.033	3.192	0.047	0.115	0	0.054	5.96059	4.95875	0.0169173	0.134	0.042	0	0.0586667	0.03	0.031	0.062	0.041	0.026	0.025	1.933	0.205	0.025	0.88	0.37	0.077	0.053	0.046	0.0586667	0.698864	0.158559	331.12	265.055	331.853	Ssa04014633,E3 ubiquitin-protein ligase,"zf-C3HC4_2,zf-RING_2"
Ssa01000320	3.909	2.251	2.2	2.78667	23.571	22.496	3.585	16.5507	0.273	2.508	1.512	1.431	2.829	4.829	2.61	3.42267	14.963	8.22	2.096	8.42633	5.93923	0.513517	2.46192	0	0	0	0	0	0.024	0	0.008	0	0.078	0	0	0	0	0	0.02	0	0	0.00666667	#DIV/0!	#DIV/0!	3.516	12.019	8.649	Ssa06018615,Sister chromatid cohesion 1 protein,"Rad21_Rec8,Rad21_Rec8_N"
Ssa06018536	1.655	1.608	2.673	1.97867	13.181	13.007	9.038	11.742	1.639	4.129	2.973	2.91367	1.62	2.564	2.395	2.193	21.641	13.448	9.775	14.9547	5.9343	1.47254	6.81927	0.3	0.312	0.208	0.273333	0.198	0.253	0.25	0.233667	4.279	2.767	1.842	1.446	2.091	1.881	1.806	1.031	0.966	2.065	1.354	0.854878	0.749723	6.585	6.944	7.774	Ssa06018247,Belongs to the protein kinase superfamily. Tyr protein kinase family,Pkinase_Tyr
Ssa05016369	0	0	0.074	0.0246667	0.015	0.03	0.394	0.146333	0.055	0.037	0.027	0.0396667	0	0	0	0	0	0	0.02	0.00666667	5.93243	1.60811	#DIV/0!	0	0	0	0	0	0	0	0	0	0	0	0	0	0	0	0	0	0	0	#DIV/0!	#DIV/0!	92.048	37.076	36.946	Ssa10002906,General transcription factor IIH subunit,Tfb5
Ssa11005003	0.592	0.223	1.059	0.624667	3.002	4.303	3.806	3.70367	11.581	1.105	3.082	5.256	6.065	4.81	7.182	6.019	5.531	8.963	1.668	5.38733	5.92903	8.41409	0.895055	0.894	0.127	0.052	0.357667	0.236	0.502	0.558	0.432	0.366	2.749	0.784	0.462	0	0	0.154	2.663	5.066	2.342	3.357	1.20783	21.7987	19.745	22.933	19.25	Ssa02009940,Belongs to the cullin family,"Cullin,Cullin_Nedd8"
Ssa09024913	0.015	0	0.05	0.0216667	0.038	0.013	0.334	0.128333	0.023	0.094	0.172	0.0963333	0	0.081	0.105	0.062	0.042	0.014	0.033	0.0296667	5.92308	4.44615	0.478495	0.067	0	0.031	0.0326667	0	0.037	0	0.0123333	0.062	0.045	0.017	0.092	0.088	0.082	0.0873333	0.015	0	0.068	0.0276667	0.377551	0.316794	0.166	0.099	0.264	Ssa01001789,Cytochrome p450,p450
Ssa01000399	0.137	1.01	0.768	0.638333	2.092	2.849	6.392	3.77767	0.329	2.419	2.577	1.775	0.704	7.321	9.394	5.80633	0.588	0.576	0.62	0.594667	5.91802	2.78068	0.102417	6.101	3.539	7.648	5.76267	3.787	1.488	1.21	2.16167	8.449	6.384	1.171	7.363	9.785	12.869	10.0057	4.924	12.631	12.991	10.182	0.375116	1.01762	14.049	17.533	30.745	Ssa12006683,Classical arabinogalactan protein,-
Ssa09024073	50.595	30.474	72.331	51.1333	335.075	298.087	274.49	302.551	680.24	373.5	407.431	487.057	631.589	441.175	635.714	569.493	190.165	284.34	236.164	236.89	5.9169	9.52523	0.415966	145.467	256.478	335.562	245.836	3151.33	3132.08	5323.6	3869	1531.71	1317	4890.17	2330.25	2422.76	2210.68	2321.23	2008.69	1551.04	1945.02	1834.92	15.7382	0.790492	9.378	15.292	9.418	Ssa01002195,disease resistance,NB-ARC
Ssa10004465	0.027	0	0.141	0.056	0	0.047	0.947	0.331333	0.218	0.583	0.47	0.423667	0.062	0.227	0.024	0.104333	0.182	0.025	0.092	0.0996667	5.91667	7.56548	0.955272	0	0	0	0	0	0	0	0	0	0.028	0	0.028	0	0	0.00933333	0	0	0	0	#DIV/0!	0	0.064	0.077	0.087	Ssa01000901,ABC-2 type transporter,"ABC2_membrane,ABC_tran"
Ssa04015397	0.047	0	0.122	0.0563333	0	0.204	0.795	0.333	3.021	0.303	0.185	1.16967	0.215	0.131	0.465	0.270333	0.045	0.132	0.053	0.0766667	5.91124	20.7633	0.2836	0	0	0	0	0	0	0	0	0	0	0	0	0	0	0	0	0	0	0	#DIV/0!	#DIV/0!	15.154	8.061	9.021	Ssa04014797,-,-
Ssa02010598	0.029	0	0.074	0.0343333	0.025	0.099	0.483	0.202333	0.046	0	0.09	0.0453333	0	0	0.026	0.00866667	0	0	0.032	0.0106667	5.8932	1.32039	1.23077	0	0	0	0	0	0	0	0	0	0	0	0	0	0	0	0	0	0	0	#DIV/0!	#DIV/0!	2.009	1.536	2.212	Ssa10003731,-,-
Ssa02011728	0.413	0.267	0.457	0.379	1.797	2.678	2.22	2.23167	3.018	3.085	2.745	2.94933	4.37	5.677	2.163	4.07	6.958	6.466	1.997	5.14033	5.8883	7.78188	1.26298	1.471	1.444	0.434	1.11633	0.071	0.113	0.594	0.259333	0.313	0.518	1.107	0.522	1.066	0.033	0.540333	0.705	0.287	0.742	0.578	0.232308	1.06971	19.135	12.132	12.765	Ssa07020779,Eukaryotic protein of unknown function (DUF1764),DUF1764
Ssa03013617	0.614	1.213	0.132	0.653	1.867	4.637	5.008	3.83733	0	3.108	2.157	1.755	0.349	2.016	1.918	1.42767	0	0.143	0.519	0.220667	5.87647	2.6876	0.154565	0.278	0.263	0.483	0.341333	0.184	0.195	0	0.126333	0.975	1.741	0.523	0.319	0.461	0.342	0.374	1.274	1.658	0.428	1.12	0.370117	2.99465	0	0	0	Ssa05016384,-,-
Ssa09025435	0.025	0.112	0.363	0.166667	0.281	1.009	1.648	0.979333	1.032	0.848	0.971	0.950333	0.821	0.602	0.822	0.748333	0.402	0.486	0.252	0.38	5.876	5.702	0.507795	0.113	0.107	0.052	0.0906667	0	0.032	0.156	0.0626667	0.29	0.103	0.424	0.414	0.349	0.277	0.346667	0.129	0.161	0.139	0.143	0.691176	0.4125	4.408	3.735	3.519	Ssa01001721,isoform X1,-
Ssa03012967	0.017	0.019	0.1	0.0453333	0.058	0.086	0.655	0.266333	0.185	0.388	0.271	0.281333	0	0.034	0.089	0.041	0.126	0.031	0.019	0.0586667	5.875	6.20588	1.43089	0.03	0	0	0.01	0	0	0	0	0.21	0.051	0.038	0.017	0.017	0	0.0113333	0.017	0	0.031	0.016	0	1.41176	47.246	24.225	26.674	Ssa07021753,Alpha-soluble nsf attachment protein,SNAP
Ssa06019184	0.041	0	0	0.0136667	0	0.036	0.204	0.08	0.066	0.22	0.387	0.224333	0.094	0.029	0	0.041	0.118	0.077	0	0.065	5.85366	16.4146	1.58537	0.037	0.035	0	0.024	0	0	0	0	0.087	1.575	0	0.815	0.041	0.138	0.331333	0	0.223	0.038	0.087	0	0.262575	21.846	27.176	30.994	Ssa09023994,Belongs to the glycosyl hydrolase 17 family,"Glyco_hydro_17,X8"
Ssa01000602	0	0.053	1.532	0.528333	1.714	2.31	5.247	3.09033	6.372	2.552	4.289	4.40433	1.282	1.915	4.151	2.44933	0.223	0.481	0.37	0.358	5.84921	8.33628	0.146162	5.866	4.591	2.611	4.356	0.337	0.837	0.413	0.529	33.172	68.783	10.503	13.033	1.835	1.098	5.322	37.181	18.062	2.928	19.3903	0.121442	3.64343	1.773	4.944	4.206	Ssa04015501,Nuclear chaperone required for maturation and nuclear export of pre-60S ribosome subunits,AAA_5
Ssa02009713	0	0	0.084	0.028	0.085	0.211	0.194	0.163333	0.235	0	0	0.0783333	0	0	0.044	0.0146667	0	0	0	0	5.83333	2.79762	0	0	0	0	0	0	0	0	0	0	0	0	0	0	0	0	0	0	0	0	#DIV/0!	#DIV/0!	3.88	9.269	7.254	Ssa10004479,Respiratory burst oxidase homolog protein,"FAD_binding_8,Ferric_reduct,NADPH_Ox,NAD_binding_6"
Ssa07020451	0.199	0.507	3.381	1.36233	0.866	3.356	19.615	7.94567	45.074	1.354	2.14	16.1893	0.312	0.827	2.358	1.16567	0.379	0.371	0.084	0.278	5.8324	11.8835	0.23849	0	0.043	0	0.0143333	0	0	0	0	0	0.103	0	0.078	0.025	0.056	0.053	0.052	0.054	0.07	0.0586667	0	1.10692	0	0.43	0	Ssa06018863,Floricaula leafy homolog,"C_LFY_FLO,LFY_SAM"
Ssa04014679	0.019	0	0.098	0.039	0.017	0.099	0.566	0.227333	0.091	0.224	0.238	0.184333	0.022	0.119	0.102	0.081	0	0	0	0	5.82906	4.7265	0	0.069	0.016	0.02	0.035	0	0.024	0	0.008	0.04	0.039	0.152	0.02	0.019	0.085	0.0413333	0.079	0.082	0.089	0.0833333	0.228571	2.01613	1.473	1.645	0.984	Ssa03013179,-,"TPR_16,TPR_2,TPR_8"
Ssa09024198	2.945	1.41	5.489	3.28133	20.744	24.399	12.148	19.097	10.125	6.972	8.889	8.662	6.819	6.145	8.16	7.04133	3.795	4	1.182	2.99233	5.81989	2.63978	0.424967	0.678	0.557	0.524	0.586333	0.777	1.589	1.883	1.41633	0.952	1.236	2.098	2.284	0.951	1.001	1.412	1.192	0.701	0.697	0.863333	2.41558	0.611426	0.524	1.149	1.432	Ssa12006546,transcription factor,Myb_DNA-binding
Ssa08022632	0.134	0.252	0.422	0.269333	0.853	1.772	2.074	1.56633	1.069	1.474	1.498	1.347	1.066	1.049	0.877	0.997333	1.187	1.372	0.955	1.17133	5.81559	5.00124	1.17447	0.97	0.689	0.468	0.709	0.214	0.454	0.561	0.409667	1.04	1.197	0.608	0.51	1.118	0.845	0.824333	0.232	0.482	0.706	0.473333	0.577809	0.574201	92.127	151.265	176.764	Ssa07021097,Belongs to the DEAD box helicase family,"DEAD,Helicase_C"
Ssa09025264	1.1	0.378	4.273	1.917	6.071	11.194	16.135	11.1333	7.639	1.53	3.25	4.13967	1.307	1.059	3.332	1.89933	1.863	1.426	0.593	1.294	5.80769	2.15945	0.681292	0.347	0.739	0.552	0.546	1.088	1.948	2.045	1.69367	0.456	0.494	0.924	1.094	0.527	2.558	1.393	0.447	0.724	0.802	0.657667	3.10195	0.472123	40.435	24.817	32.488	Ssa04015384,Protein SAWADEE HOMEODOMAIN HOMOLOG,SAWADEE
Ssa02010414	0	0	0.055	0.0183333	0	0	0.319	0.106333	0.103	2.201	0.857	1.05367	0.587	0	0.23	0.272333	0	0	0	0	5.8	57.4727	0	0	0	0	0	0	0	0	0	0	0	0	0	0	0	0	0	0	0	0	#DIV/0!	#DIV/0!	7.742	3.971	5.291	Ssa12007436,Omega-hydroxypalmitate O-feruloyl,Transferase
Ssa02010488	0	0.057	0.021	0.026	0.065	0.065	0.322	0.150667	1.797	0.027	0.098	0.640667	0	0.017	0.022	0.013	0	0	0	0	5.79487	24.641	0	0.181	0.386	0	0.189	0	0.032	0.031	0.021	0	0.052	0.028	0	0	0.028	0.00933333	0.104	0.054	0.047	0.0683333	0.111111	7.32143	1.875	5.431	2.607	Ssa04014573,RING-H2 finger protein,zf-RING_2
Ssa08021894	0.413	0.3	0.457	0.39	1.874	2.678	2.22	2.25733	3.018	3.778	3.344	3.38	4.403	5.759	2.479	4.21367	6.874	6.438	1.997	5.103	5.78803	8.66667	1.21106	1.471	1.444	0.403	1.106	0.071	0.113	0.631	0.271667	0.375	0.518	1.006	0.553	1.036	0.033	0.540667	0.705	0.287	0.742	0.578	0.24563	1.06905	10.768	7.007	7.811	Ssa05016501,Isochorismatase family,Isochorismatase
Ssa06018644	0.063	0	0	0.021	0.027	0.027	0.31	0.121333	0.05	0.2	0.147	0.132333	0.036	0	0.028	0.0213333	0.624	0	0	0.208	5.77778	6.30159	9.75	0	0	0	0	0	0	0	0	0	0.032	0	0	0	0	0	0.13	0	0	0.0433333	#DIV/0!	#DIV/0!	0	0	0.146	Ssa03012816,Actin depolymerisation factor/cofilin -like domains,Cofilin_ADF
Ssa01000978	0.097	0	0.914	0.337	0.505	0.836	4.499	1.94667	1.854	1.135	2.343	1.77733	0.661	0.937	1.296	0.964667	0.644	0.451	0	0.365	5.77646	5.27399	0.378369	0.263	0	0	0.0876667	0.116	0.123	0.122	0.120333	0.103	0.899	0.33	0.101	0	0.216	0.105667	0.301	0.105	0	0.135333	1.37262	1.28076	0	0	0.854	Ssa08022666,-,-
Ssa04015650	13.833	21.147	5.32	13.4333	90.941	64.127	77.667	77.5783	70.302	147.493	139.477	119.091	280.256	702.911	631.004	538.057	133.676	119.178	109.209	120.688	5.77506	8.86531	0.224303	10.37	26.75	19.259	18.793	243.73	197.977	182.26	207.989	432.324	377.268	131.083	554.927	505.276	681.22	580.474	186.188	143.641	157.635	162.488	11.0674	0.279923	0.19	2.014	1.833	Ssa02010794,Pentatricopeptide repeat-containing protein,"PPR,PPR_2,PPR_3"
Ssa02011682	0.111	0.042	0.032	0.0616667	0.193	0.288	0.586	0.355667	0.886	0.118	0.058	0.354	0.042	0.077	0.066	0.0616667	0.035	0	0.042	0.0256667	5.76757	5.74054	0.416216	0	0	0	0	0	0	0.186	0.062	0	0.038	0	0	0	0	0	0	0	0	0	#DIV/0!	#DIV/0!	39.371	22.163	16.286	Ssa06019681,-,Prefoldin_2
Ssa03012620	0.061	0.206	0.209	0.158667	0.898	0.945	0.902	0.915	2.912	0.648	1.566	1.70867	0.623	0.925	0.923	0.823667	0.404	0.226	0.068	0.232667	5.76681	10.7689	0.282477	0.055	0	0	0.0183333	0.073	0.155	0.076	0.101333	0.064	0.188	0.069	0.126	0.183	0.203	0.170667	0	0.066	0.17	0.0786667	5.52727	0.460938	13.648	13.18	11.547	Ssa03013581,Pyridoxamine 5'-phosphate oxidase,Pyrid_oxidase_2
Ssa13008937	0	0	0.135	0.045	0	0	0.778	0.259333	0.502	0.168	0.123	0.264333	0.358	0.326	0.281	0.321667	0.149	0	0	0.0496667	5.76296	5.87407	0.154404	0	0	0	0	0	0	0	0	0	0	0.357	0	0	0.175	0.0583333	0	0.17	0	0.0566667	#DIV/0!	0.971429	171.231	129.158	169.606	Ssa02010828,Heavy metal-associated isoprenylated plant protein,HMA
Ssa01001124	0.235	1.093	1.537	0.955	1.708	4.127	10.675	5.50333	6.931	3.033	6.092	5.352	1.636	1.987	4.453	2.692	2.09	1.093	1.322	1.50167	5.76265	5.60419	0.557826	0.478	0.478	0.462	0.472667	2.177	2.165	1.88	2.074	5.313	1.846	2.465	2.409	2.146	2.81	2.455	4.018	3.328	4.259	3.86833	4.38787	1.5757	0.966	1.156	0	Ssa02010900,Belongs to the HisA HisF family,"GATase,His_biosynth"
Ssa01001266	0.671	0.479	0.971	0.707	2.396	4.714	5.103	4.071	3.217	3.786	3.422	3.475	1.649	2.774	3.898	2.77367	1.343	1.169	0.916	1.14267	5.75813	4.91513	0.41197	0.304	0.288	0.223	0.271667	0.317	0.202	0.2	0.239667	0.674	0.82	0.843	0.808	0.584	0.256	0.549333	0.715	0.42	1.184	0.773	0.882209	1.40716	2.553	7.456	5.192	Ssa06018103,3-deoxy-D-manno-octulosonic acid,Glycos_transf_N
Ssa01002097	0	0.039	0.059	0.0326667	0.074	0.118	0.372	0.188	0.055	0.018	0	0.0243333	0	0.047	0	0.0156667	0	0.032	0	0.0106667	5.7551	0.744898	0.680851	0	0	0	0	0	0	0	0	0	0	0	0	0	0	0	0	0	0	0	#DIV/0!	#DIV/0!	7.203	18.876	22.76	Ssa09025787,transcription factor,Myb_DNA-binding
Ssa12007591	0	0	0.302	0.100667	0	0	1.738	0.579333	0	2.548	3.842	2.13	0.16	0	0.063	0.0743333	0.134	0.131	2.218	0.827667	5.75497	21.1589	11.1345	0	0.121	0	0.0403333	0.168	0	0	0.056	0.074	1.886	0.399	0	0	0.078	0.026	4.742	0.228	1.439	2.13633	1.38843	82.1667	6.254	14.571	22.566	Ssa12007358,-,-
Ssa07020339	0.068	0	0.437	0.168333	0.295	0.498	2.113	0.968667	1.408	0.253	0.636	0.765667	0.193	0.305	0.121	0.206333	0.387	0.126	0	0.171	5.75446	4.54851	0.828756	0.061	0.116	0.214	0.130333	0.528	0.345	0.512	0.461667	0.719	0.245	0.616	0.353	0.204	15	5.18567	0.352	0.293	0.41	0.351667	3.5422	0.0678151	13.931	13.627	11.761	Ssa07021032,strigolactone esterase DAD2,"Abhydrolase_1,Abhydrolase_6"
Ssa13008318	0.071	0	0.307	0.126	0.373	0.741	1.061	0.725	0.457	0.076	0.391	0.308	0.325	0.494	1.468	0.762333	0.204	0.866	0.644	0.571333	5.75397	2.44444	0.749453	8.803	12.082	23.781	14.8887	136.2	126.378	216.763	159.78	55.661	62.105	96.935	24.453	35.107	18.318	25.9593	69.973	22.637	29.145	40.585	10.7317	1.56341	8.22	5.361	8.922	Ssa13009420,Tetratricopeptide repeat,"TPR_1,TPR_2,TPR_8"
Ssa02010065	0.089	0	0.038	0.0423333	0.155	0.307	0.264	0.242	0	0.095	0.069	0.0546667	0	0	0.079	0.0263333	0.042	0.041	0.05	0.0443333	5.71654	1.29134	1.68354	0.04	0.076	0.047	0.0543333	0	0	0	0	0	0.321	0	0	0	0	0	0	0	0.041	0.0136667	0	#DIV/0!	0.309	0.493	0	Ssa04015460,-,-
Ssa08023188	0	0	0.042	0.014	0	0	0.24	0.08	0.233	0.104	0.209	0.182	0	0.017	0.022	0.013	0.092	0.068	0.027	0.0623333	5.71429	13	4.79487	0.44	0.188	0.306	0.311333	1.949	1.453	1.252	1.55133	0.515	0.175	0.248	0.808	0.341	0.379	0.509333	0.252	0.236	0.362	0.283333	4.98287	0.556283	0.178	0	0	Ssa03012505,Belongs to the cytochrome P450 family,p450
Ssa06018240	0.114	0	0	0.038	0.099	0.099	0.453	0.217	0.913	0.366	0.268	0.515667	0	0	0.204	0.068	0.326	0	0.129	0.151667	5.71053	13.5702	2.23039	0	0.098	0	0.0326667	0	0	0.144	0.048	0.121	0	0	0	0	0.127	0.0423333	0.119	0	0.106	0.075	1.46939	1.77165	0	0.078	0.089	Ssa02011720,(-)-germacrene D synthase-like,"Terpene_synth,Terpene_synth_C"
Ssa09024735	0	0	0.075	0.025	0	0.038	0.39	0.142667	0.07	0.421	0.103	0.198	0	0.061	0	0.0203333	0.042	0	0.099	0.047	5.70667	7.92	2.31148	0	0	0	0	0	0	0	0	0	0	0	0	0	0	0	0	0	0	0	#DIV/0!	#DIV/0!	12.828	7.355	6.578	Ssa11005226,Belongs to the enoyl-CoA hydratase isomerase family,ECH_1
Ssa02010882	0.209	0.118	1.097	0.474667	0.578	1.857	5.687	2.70733	1.478	1.32	2.382	1.72667	0.208	1.037	1.49	0.911667	0.632	0.328	0.426	0.462	5.70365	3.63764	0.506764	2.397	3.009	3.708	3.038	3.419	2.622	1.246	2.429	2.555	1.372	1.288	2.752	3.476	1.365	2.531	2.612	2.734	3.726	3.024	0.799539	1.19478	4.159	2.096	0.931	Ssa13008302,"D-arabinono-1,4-lactone oxidase","ALO,FAD_binding_4"
Ssa01000942	16.051	13.985	17.514	15.85	109.565	115.46	46.146	90.3903	19.824	20.989	11.884	17.5657	77.9	40.453	39.759	52.704	34.812	54.779	38.849	42.8133	5.70286	1.10824	0.812336	1.843	1.346	1.296	1.495	0.719	1.954	1.804	1.49233	1.838	2.1	1.061	0.52	0.569	0.595	0.561333	1.386	1.334	0.932	1.21733	0.998216	2.16865	7.146	7.489	6.235	Ssa10004880,Serine threonine-protein kinase,Pkinase
Ssa02009458	0.408	0.486	0.565	0.486333	1.222	3.484	3.61	2.772	1.195	1.788	2.372	1.785	0.49	1.27	1.377	1.04567	0.409	0.528	0.179	0.372	5.69979	3.67032	0.355754	0.021	0.019	0	0.0133333	0.081	0.029	0.142	0.084	0.24	0.491	0.412	0.636	0.295	0.404	0.445	0.329	0.245	0.232	0.268667	6.3	0.603745	8.276	12.629	13.135	Ssa08023904,-,-
Ssa01000054	0	0	0.039	0.013	0	0	0.222	0.074	0	0.024	0.053	0.0256667	0	0	0.04	0.0133333	0.085	0.021	0	0.0353333	5.69231	1.97436	2.65	0.041	0	0	0.0136667	0	0.029	0	0.00966667	0.048	0.023	0.051	0	0.022	0	0.00733333	0.047	0.048	0	0.0316667	0.707317	4.31818	84.765	35.229	57.011	Ssa02010095,-,-
Ssa09024142	0	0	0.024	0.008	0	0	0.136	0.0453333	9.235	0	0	3.07833	0	0	0.024	0.008	0	0	0	0	5.66667	384.792	0	0	0	0	0	0	0	0	0	0	0	0	0	0	0	0	0	0.03	0	0.01	#DIV/0!	#DIV/0!	8.18	3.77	5.654	Ssa08023790,CLASP N terminal,CLASP_N
Ssa13008367	0	0.206	0.861	0.355667	3.487	2.283	0.271	2.01367	0	0.292	0.498	0.263333	0.415	0	0	0.138333	6.842	1.019	0.411	2.75733	5.66167	0.740394	19.9325	0.66	0.235	0.096	0.330333	0	0	0	0	0.097	0.094	0.207	0	0	0.203	0.0676667	1.798	1.379	0.764	1.31367	0	19.4138	4.956	21.101	13.367	Ssa09025186,Metal transporter Nramp2-like,Nramp
Ssa02010211	0	0.275	0	0.0916667	0.282	0.07	1.204	0.518667	0.259	0.433	0.127	0.273	0	0.393	0.217	0.203333	0.308	0.756	0.915	0.659667	5.65818	2.97818	3.24426	0.294	0.557	0.085	0.312	0.292	0.207	0.408	0.302333	0.086	0.168	0.922	0.76	0.407	0.543	0.57	0.506	0.351	0.378	0.411667	0.969017	0.722222	6.3	8.627	9.081	Ssa03013304,IAA-amino acid hydrolase ILR1-like,"M20_dimer,Peptidase_M20"
Ssa01002366	0	0	0.032	0.0106667	0	0	0.181	0.0603333	0.059	0.078	0.057	0.0646667	0	0	0	0	0.035	0	0	0.0116667	5.65625	6.0625	#DIV/0!	0	0	0	0	0	0	0	0	0.078	0.114	0.042	0	0	0.082	0.0273333	0.038	0.04	0	0.026	#DIV/0!	0.95122	0	0	0.03	Ssa05016460,Alpha-L-arabinofuranosidase,Alpha-L-AF_C
Ssa07020993	0.108	0.061	0.371	0.18	0.798	0.653	1.602	1.01767	0.086	1.266	1.687	1.013	0.061	0.112	0	0.0576667	5.284	0.101	0.122	1.83567	5.6537	5.62778	31.8324	0	0	0	0	0	0	0	0	0	0.279	0.061	0	0	0	0	0	0	0	0	#DIV/0!	#DIV/0!	19.384	38.05	26.611	Ssa09024394,Transcription initiation factor TFIID subunit,"RRM_1,zf-RanBP"
Ssa02009535	0.023	0.026	0.086	0.045	0	0.086	0.677	0.254333	0.123	0.098	0.12	0.113667	0.026	0.181	0.124	0.110333	0.037	0.029	0.009	0.025	5.65185	2.52593	0.226586	0.049	0	0	0.0163333	0	0.02	0.01	0.01	0.016	0.071	0.009	0.032	0.023	0.009	0.0213333	0.016	0.025	0.014	0.0183333	0.612245	0.859375	2.896	1.082	0.898	Ssa10003399,"Binds to single and double-stranded DNA and exhibits DNA-dependent ATPase activity. Unwinds duplex DNA. Component of the meiotic recombination pathway. Seems to play a role in mediating chromosome homology search, chromosome pairing and synapsis at early stages and probably chromosome crossing-over at later stages in meiosis. Probably is involved in the repair of meiotic double stran…
Ssa01000370	1.226	1.028	2.651	1.635	7.807	13.596	6.3	9.23433	2.59	7.887	11.586	7.35433	1.846	0.684	1.378	1.30267	207.519	109.244	60.056	125.606	5.64791	4.49806	96.4225	0.036	0.102	0	0.046	0.047	0.201	0.099	0.115667	0.419	1.021	0.09	0.082	0.04	0.044	0.0553333	1.643	2.608	0.921	1.724	2.51449	31.1566	5.413	6.836	5.515	Ssa03012450,B3 domain-containing protein,B3
Ssa01001492	0.016	0.019	0.07	0.035	0	0.042	0.551	0.197667	0.131	0.122	0.102	0.118333	0.019	0.023	0.029	0.0236667	0.078	0.046	0.037	0.0536667	5.64762	3.38095	2.26761	0	0	0	0	0	0	0	0	0	0.017	0	0	0	0	0	0	0	0	0	#DIV/0!	#DIV/0!	6.722	6.513	3.963	Ssa07021488,"Domain found in Dishevelled, Egl-10, and Pleckstrin (DEP)","DEP,DUF547,Glutaredoxin"
Ssa01001000	0	0	0.056	0.0186667	0	0.057	0.259	0.105333	1.151	0.07	0.205	0.475333	0.075	0.045	0.117	0.079	0	0.061	0	0.0203333	5.64286	25.4643	0.257384	0.178	0.225	0	0.134333	0.078	0	0.33	0.136	0.625	0.27	1.637	0.409	0.197	0.803	0.469667	0.136	0.071	0.427	0.211333	1.01241	0.449965	0.506	2.055	1.885	Ssa08022018,Belongs to the IPP transferase family,IPPT
Ssa09024376	0	0.081	0.031	0.0373333	0.062	0.464	0.106	0.210667	0.401	0.076	0	0.159	0.286	0	0.032	0.106	0.068	0.234	0.121	0.141	5.64286	4.25893	1.33019	0.292	0.277	0.188	0.252333	0.043	0	0.18	0.0743333	0.266	0.37	0.081	0.596	0.359	0.16	0.371667	1.414	2.983	0.667	1.688	0.294584	4.5417	11.403	9.438	15.002	Ssa04014732,Origin recognition complex subunit,ORC3_N
Ssa08022985	0.218	0	1.936	0.718	0.063	0.942	11.149	4.05133	1.742	8.14	15.22	8.36733	0.331	0.402	0.39	0.374333	6.978	1.016	1.393	3.129	5.64253	11.6537	8.35886	0.198	0.062	0	0.0866667	0	0	0.091	0.0303333	0.077	1.201	0.413	0	0	0	0	0.075	0.079	0	0.0513333	0.35	#DIV/0!	9.24	10.97	7.435	Ssa11005719,Protein GDAP2 homolog,"CRAL_TRIO_2,Macro"
Ssa11005341	0.388	0.398	2.391	1.059	5.483	6.238	6.205	5.97533	1.182	1.428	0.908	1.17267	0.882	0.146	0.157	0.395	2.511	1.083	0.397	1.33033	5.64243	1.10733	3.36793	11.839	8.526	7.249	9.20467	2.195	2.512	3.5	2.73567	2.277	2.909	5.043	1.173	5.157	0	2.11	25.754	21.863	20.93	22.849	0.297204	10.8289	68.694	46.362	37.134	Ssa09025904,Transcription initiation factor IIF subunit,TFIIF_beta
Ssa02012038	2.695	3.024	2.134	2.61767	21.112	15.26	7.892	14.7547	2.347	2.444	3.73	2.84033	3.505	3.872	6.86	4.74567	0.948	1.125	0.749	0.940667	5.63657	1.08506	0.198216	3.613	6.996	4.683	5.09733	6.454	6.526	4.884	5.95467	9.324	6.987	4.63	6.986	5.77	2.729	5.16167	2.052	1.816	1.922	1.93	1.16819	0.37391	0.418	3.564	2.137	Ssa01000296,NYN domain,"NYN,OHA"
Ssa06018280	0.038	0.043	0.524	0.201667	0.099	0.329	2.979	1.13567	1.4	0.325	0.863	0.862667	0.043	0.158	0.613	0.271333	1.304	0.462	0.215	0.660333	5.6314	4.27769	2.43366	0.104	0.131	0.04	0.0916667	0.046	0	0.048	0.0313333	0.04	0.039	0.13	0	0	0	0	0.277	0.041	0.106	0.141333	0.341818	#DIV/0!	0.249	0.331	1.211	Ssa09025790,Mediates both low-affinity uptake and efflux of sugar across the membrane,MtN3_slv
Ssa07020628	0.119	0.268	0.51	0.299	0.516	1.127	3.405	1.68267	4.359	1.518	1.761	2.546	0.405	0.328	0.848	0.527	1.128	0.442	1.204	0.924667	5.62765	8.51505	1.75459	0	0.204	0.249	0.151	0.284	0	0.149	0.144333	0.126	0.122	0.404	0	0.238	0.132	0.123333	0.123	0	0	0.041	0.95585	0.332432	8.704	8.466	9.94	Ssa12008017,Pentatricopeptide repeat-containing protein At1g30610,"PPR,PPR_2"
Ssa04014403	0	0	0.048	0.016	0	0.048	0.222	0.09	0.09	0.06	0.263	0.137667	0	0	0	0	0.053	0	0	0.0176667	5.625	8.60417	#DIV/0!	0	0.048	0	0.016	0	0	0.071	0.0236667	0.06	0.116	0.255	0.058	0.113	0.125	0.0986667	0	0	0	0	1.47917	0	2.352	3.253	2.763	Ssa01001946,"Type I inositol 1,4,5-trisphosphate 5-phosphatase CVP2-like",Exo_endo_phos
Ssa09024081	0.107	0.081	0.367	0.185	0.093	0.277	2.75	1.04	0.114	0.38	1.058	0.517333	0.325	0.099	0.159	0.194333	0.609	0.033	0.12	0.254	5.62162	2.7964	1.30703	0	0	0	0	0	0	0	0	0	0	0	0	0	0	0	0.037	0	0	0.0123333	#DIV/0!	#DIV/0!	1.158	0.132	0.151	Ssa06018653,-,-
Ssa03012841	0.026	0.029	0.011	0.022	0.067	0.077	0.227	0.123667	0.061	0.054	0.01	0.0416667	0.058	0.185	0.08	0.107667	0.085	0.059	0.058	0.0673333	5.62121	1.89394	0.625387	0	0	0	0	0	0	0.016	0.00533333	0.027	0	0.029	0.093	0.013	0.014	0.04	0	0.014	0	0.00466667	#DIV/0!	0.116667	0	0	0	Ssa08023186,Zinc finger Ran-binding domain-containing protein,zf-RanBP
Ssa04015680	0	0	0.139	0.0463333	0.14	0	0.638	0.259333	0	0.172	0.504	0.225333	0	0	0.144	0.048	0	0	0	0	5.59712	4.86331	0	0.146	0	0	0.0486667	0	0	0	0	0.171	0	0	0	0	0	0	0	0	0.15	0.05	0	#DIV/0!	3.49	7.839	8.71	Ssa04015616,NUMOD3 motif (2 copies),NUMOD3
Ssa07019892	0.447	0.505	1.13	0.694	3.5	1.732	6.41	3.88067	0.346	8.339	4.171	4.28533	1.003	1.303	0.799	1.035	0.696	1.124	1.451	1.09033	5.59174	6.17483	1.05346	0.221	0.244	0.384	0.283	0.097	0.104	0.119	0.106667	0.704	1.133	0.046	0.367	0.149	0.015	0.177	0.591	0.103	0.29	0.328	0.376914	1.85311	0.116	0.297	0.234	Ssa10004537,Domain of unknown function (DUF3444),"DUF3444,DnaJ"
Ssa01001897	0.201	0.057	2.81	1.02267	1.312	3.085	12.743	5.71333	13.42	6.062	3.223	7.56833	2.807	0.522	3.461	2.26333	7.889	1.172	0.907	3.32267	5.5867	7.40059	1.46804	0	0	0	0	0	0.064	0.822	0.295333	0.267	0.156	2.343	0.837	0.706	0.28	0.607667	0.157	0.109	0.234	0.166667	#DIV/0!	0.274273	0.051	0.123	0.281	Ssa10004897,Protein ASPARTIC PROTEASE IN GUARD CELL,"TAXi_C,TAXi_N"
Ssa02010769	0	0.056	0.171	0.0756667	0.216	0.215	0.836	0.422333	0.318	0.318	0.466	0.367333	0.057	0.516	0.311	0.294667	0.614	0.788	0.112	0.504667	5.5815	4.85463	1.71267	0	0	0	0	0	0	0	0	0.105	0.103	0.056	0.103	0	0.055	0.0526667	0.052	0.107	0.278	0.145667	#DIV/0!	2.76582	342.913	216.443	261.967	Ssa08023787,Rapid ALkalinization Factor (RALF),RALF
Ssa02012045	10.426	4.331	11.806	8.85433	50.075	62.016	36.139	49.41	7.087	28.248	20.592	18.6423	11.181	13.586	18.316	14.361	41.016	48.849	25.054	38.3063	5.58032	2.10545	2.66739	7.881	4.731	2.939	5.18367	1.548	1.645	4.658	2.617	7.531	12.359	14.044	13.485	8.335	10.417	10.7457	6.351	4.936	6.457	5.91467	0.504855	0.550423	21.307	26.99	36.426	Ssa07020933,Plastidial lipoyltransferase 2-like,BPL_LplA_LipB
Ssa08022311	3.345	1.15	6.309	3.60133	18.048	23.39	18.81	20.0827	7.955	7.985	9.257	8.399	6.166	3.646	3.54	4.45067	12.747	6.944	8.933	9.54133	5.57645	2.33219	2.1438	1.416	1.217	0.916	1.183	0.479	0.555	1.326	0.786667	3.197	3.639	6.277	1.815	1.093	2.107	1.67167	1.623	1.808	1.489	1.64	0.664976	0.981057	0	0	0.456	Ssa05016616,-,-
Ssa13009306	0.857	0.306	3.718	1.627	2.117	10.299	14.786	9.06733	7.525	3.028	5.705	5.41933	0.821	1.684	2.859	1.788	2.977	1.008	1.016	1.667	5.57304	3.33087	0.932327	3.042	3.385	3.384	3.27033	5.67	4.793	5.244	5.23567	4.18	1.419	3.764	1.735	1.424	1.181	1.44667	2.762	2.632	3.715	3.03633	1.60096	2.09885	0	0	0	Ssa08022856,receptor-like protein kinase,"GUB_WAK_bind,Pkinase,Pkinase_Tyr"
Ssa09025228	2.334	1.53	4.47	2.778	10.441	17.772	18.173	15.462	5.378	23.024	21.153	16.5183	1.237	4.461	6.541	4.07967	3.369	1.859	1.145	2.12433	5.56587	5.94612	0.520712	3.808	1.972	1.421	2.40033	1.344	0.658	0.919	0.973667	9.836	20.925	4.776	4.113	2.036	3.475	3.208	15.057	1.156	0.829	5.68067	0.405638	1.77078	8.859	23.465	14.923	Ssa09024041,Belongs to the thiolase family,"Thiolase_C,Thiolase_N"
Ssa11005009	0.077	0	0.033	0.0366667	0.233	0	0.379	0.204	0	0.9	0.12	0.34	0.306	0.053	0.069	0.142667	7.07	0.786	0.259	2.705	5.56364	9.27273	18.9603	0.035	0.165	0.121	0.107	0.092	0	0.048	0.0466667	0.163	0	0.871	0.04	0.077	0.043	0.0533333	0.876	0.456	0.75	0.694	0.436137	13.0125	3.831	5.004	4.039	Ssa01002521,HEAT repeat-containing protein,-
Ssa04014846	0	0	0.144	0.048	0.117	0.087	0.597	0.267	0.107	0.036	0.236	0.126333	0	0.162	0.21	0.124	0.127	0.031	0.038	0.0653333	5.5625	2.63194	0.526882	0	0.029	0	0.00966667	0	0.043	0	0.0143333	0	0.035	0	0.035	0.067	0.15	0.084	0.035	0.073	0.062	0.0566667	1.48276	0.674603	26.536	51.284	63.058	Ssa13009028,"Enoyl- acyl-carrier-protein reductase NADH , chloroplastic-like",adh_short_C2
Ssa12007480	0	0	0.027	0.009	0	0.055	0.094	0.0496667	0.051	0	0.025	0.0253333	0	0.022	0.028	0.0166667	0	0	0.036	0.012	5.51852	2.81481	0.72	0	0	0.033	0.011	0	0	0	0	0	0	0	0	0	0	0	0	0	0	0	0	#DIV/0!	77.094	72.722	105.366	Ssa06019427,Arginine and glutamate-rich 1,ARGLU
Ssa01001054	0.049	0	0	0.0163333	0.084	0.042	0.144	0.09	0	0	0.114	0.038	0	0	0	0	0.046	0	0.055	0.0336667	5.5102	2.32653	#DIV/0!	0	0	0.051	0.017	0	0	0	0	0	0.601	0	0	0	0.108	0.036	0.101	0.42	0	0.173667	0	4.82407	0.584	2.484	3.014	Ssa04014780,-,-
Ssa06018135	0.167	0	1.1	0.422333	0.29	0.961	5.727	2.326	8.001	2.789	4.13	4.97333	0.444	1.232	1.79	1.15533	2.697	0.622	0.69	1.33633	5.5075	11.7758	1.15666	0	0	0	0	0	0	0	0	0	0.057	0	0.116	0	0	0.0386667	0.116	0	0.052	0.056	#DIV/0!	1.44828	1.038	0.414	0.236	Ssa04015068,-,-
Ssa05016316	0.977	0.649	2.303	1.30967	6.592	5.456	9.584	7.21067	5.963	9.778	12.741	9.494	3.727	2.092	5.592	3.80367	1.146	1.017	0.95	1.03767	5.50573	7.24917	0.272807	5.323	3.204	4.682	4.403	6.765	5.752	8.619	7.04533	10.651	23.454	11.092	5.814	3.666	1.643	3.70767	10.654	5.174	7.558	7.79533	1.60012	2.10249	1.172	4.612	1.922	Ssa02011843,secretory carrier-associated membrane protein,SCAMP
Ssa07021051	0	0.093	0.142	0.0783333	0.36	0.357	0.573	0.43	0.793	0.353	0.84	0.662	0.188	0.515	0.37	0.357667	0.315	0	0	0.105	5.48936	8.45106	0.293569	0.375	0.852	0.695	0.640667	1.388	0.737	1.769	1.298	2.981	1.623	2.632	3.529	1.41	1.476	2.13833	4.983	3.31	1.849	3.38067	2.02601	1.58098	5.916	2.508	3.032	Ssa10003486,-,-
Ssa11005742	0.254	0.179	0.232	0.221667	0.524	0.493	2.621	1.21267	0.127	0.947	0.867	0.647	0.163	0.428	0.666	0.419	0.301	0.133	0.179	0.204333	5.47068	2.9188	0.487669	0	0	0	0	0	0.02	0.04	0.02	0.067	0.131	0.036	0.016	0.016	0	0.0106667	0.132	0.36	0.192	0.228	#DIV/0!	21.375	11.18	13.848	10.124	Ssa12007918,Catalyzes the ATP-dependent amination of UTP to CTP with either L-glutamine or ammonia as the source of nitrogen,"CTP_synth_N,GATase"
Ssa03012372	0.247	0.279	1.21	0.578667	0.902	0.491	8.092	3.16167	1.263	1.739	3.841	2.281	0	0.479	0.132	0.203667	2.419	1.796	0.446	1.55367	5.46371	3.94182	7.62848	3.066	2.333	2.231	2.54333	0	0.031	0.311	0.114	2.828	1.53	0.337	0.051	0.025	0	0.0253333	0.718	0.534	0.92	0.724	0.0448231	28.5789	7.769	21.785	18.81	Ssa09024467,zinc finger,-
Ssa10004688	0.037	0.166	0.095	0.0993333	0.032	0	1.596	0.542667	0.059	2.659	0.945	1.221	0	0	0	0	0.035	0	0	0.0116667	5.46309	12.2919	#DIV/0!	0	0.094	0	0.0313333	0	0	0	0	0	0.416	0	0	0	0	0	0	0	0	0	0	#DIV/0!	12.43	19.147	15.432	Ssa10004832,RNA polymerase-associated protein,Leo1
Ssa11005686	0	0	0.029	0.00966667	0.029	0.029	0.1	0.0526667	0	0.072	0.237	0.103	0	0.047	0.03	0.0256667	0.032	0.031	0	0.021	5.44828	10.6552	0.818182	0	0.029	0	0.00966667	0	0.043	0	0.0143333	0	0	0.038	0.035	0.034	0.113	0.0606667	0	0.036	0	0.012	1.48276	0.197802	48.226	38.479	51.794	Ssa05016068,Belongs to the protein kinase superfamily,Pkinase
Ssa06019755	4.755	3.86	14.125	7.58	54.165	48.413	21.116	41.2313	12.102	8.871	10.444	10.4723	5.468	6.097	6.547	6.03733	118.539	82.551	76.36	92.4833	5.43949	1.38157	15.3186	5.92	4.419	2.859	4.39933	2.254	3.53	2.055	2.613	2.309	3.373	4.332	2.163	2.184	3.532	2.62633	1.491	1.178	1.844	1.50433	0.593954	0.572788	1.588	1.657	2.56	Ssa06019009,Olee1-like,Pollen_Ole_e_I
Ssa04014858	0.034	0	0.103	0.0456667	0.03	0.119	0.596	0.248333	0.082	0.183	0.282	0.182333	0.059	0.048	0.031	0.046	0.065	0.032	0.039	0.0453333	5.43796	3.9927	0.985507	0	0	0	0	0	0	0	0	0	0.018	0	0	0	0	0	0	0	0	0	#DIV/0!	#DIV/0!	65.342	16.767	24.672	Ssa08022410,NADPH quinone,FMN_red
Ssa06018441	0.121	0	0	0.0403333	0.105	0.313	0.239	0.219	0.193	0	0.094	0.0956667	0.138	0.167	0.108	0.137667	0	0.113	0.136	0.083	5.42975	2.3719	0.602906	0	0.104	0	0.0346667	0	0	0.152	0.0506667	0.384	5.867	0	2.013	0	0.674	0.895667	0	1.177	0.225	0.467333	1.46154	0.521771	14.097	12.982	17.226	Ssa07021080,-,-
Ssa11005252	0	0	0.035	0.0116667	0.035	0.035	0.12	0.0633333	0.129	0.086	0.126	0.113667	0.229	0	0	0.0763333	0.038	0.038	0	0.0253333	5.42857	9.74286	0.331878	0	0	0	0	0	0	0	0	0	0.707	0.092	0.168	0	0.135	0.101	0	0.044	0	0.0146667	#DIV/0!	0.145215	1.931	4.806	2.137	Ssa03014186,Clathrin assembly protein,ANTH
Ssa06017566	0.071	0.129	0.184	0.128	0.075	0.148	1.852	0.691667	0.068	3.978	6.33	3.45867	0.049	0.366	0.064	0.159667	1.019	1.438	2.433	1.63	5.40365	27.0208	10.2088	0.078	0.012	0	0.03	0	0	0	0	0.015	2.169	0	0.03	0	0	0.01	0.03	0	0.013	0.0143333	0	1.43333	5.3	6.9	9.955	Ssa03012578,"Tubulin/FtsZ family, C-terminal domain","Tubulin,Tubulin_C"
Ssa06017991	3.785	2.984	1.965	2.91133	13.513	15.008	18.531	15.684	23.743	27.906	26.418	26.0223	53.078	62.48	59.562	58.3733	52.326	55.196	52.373	53.2983	5.38722	8.93829	0.91306	1.254	3.966	3.161	2.79367	22.34	19.745	35.887	25.9907	61.147	57.877	50.513	115.187	108.887	103.777	109.284	145.463	114.96	99.764	120.062	9.30342	1.09863	1.801	1.57	1.313	Ssa10004592,Pentatricopeptide repeat-containing protein,"PPR,PPR_2,PPR_3"
Ssa03014056	0	0	0.061	0.0203333	0.015	0.031	0.282	0.109333	0.057	0.266	0.264	0.195667	0.041	0.025	0.016	0.0273333	0.135	0.066	0	0.067	5.37705	9.62295	2.45122	0.048	0	0.019	0.0223333	0.021	0.023	0.022	0.022	0.075	0.037	0.04	0	0.071	0.059	0.0433333	0	0.038	0.017	0.0183333	0.985075	0.423077	190.409	122.479	124.339	Ssa12007781,Nascent polypeptide-associated complex subunit beta,NAC
Ssa03013673	3.643	3.78	9.097	5.50667	36.786	30.76	21.243	29.5963	22.39	7.948	13.761	14.6997	9.257	8.378	9.761	9.132	9.578	8.563	3.724	7.28833	5.37464	2.66943	0.798109	5.102	4.107	1.111	3.44	3.551	5.23	7.562	5.44767	5.834	7.824	11.883	5.55	4.161	2.643	4.118	11.521	16.07	19.637	15.7427	1.58362	3.82289	13.496	8.605	23.302	Ssa12006697,membrane protein At1g06890-like,TPT
Ssa01000788	0.108	0	0.031	0.0463333	0.25	0.248	0.249	0.249	2.009	0.153	0.281	0.814333	0.941	0.646	0.257	0.614667	0.239	0.402	0.162	0.267667	5.3741	17.5755	0.435466	0.065	0.031	0.038	0.0446667	0.043	0.046	0.181	0.09	0.152	0.111	0	0	0	0	0	0.037	0	0	0.0123333	2.01493	#DIV/0!	1.141	2.936	1.375	Ssa03013017,RING-like zinc finger,zf-RING_2
Ssa02011689	0.637	0.46	0.708	0.601667	4.084	2.353	3.263	3.23333	1.901	2.927	2.666	2.498	1.545	1.112	1.222	1.293	0.942	0.953	0.918	0.937667	5.37396	4.1518	0.725187	0.293	0.233	0.208	0.244667	0.163	0.213	0.105	0.160333	0.376	0.312	0.166	0.195	0.209	0.291	0.231667	0.499	0.858	0.904	0.753667	0.655313	3.25324	2.794	3.185	2.416	Ssa03012365,ATP-dependent DNA helicase,"Helicase_C,SNF2_N"
Ssa07021355	0.027	0	0	0.009	0.024	0.094	0.027	0.0483333	0	0.116	0	0.0386667	0	0.019	0.024	0.0143333	0	0	0.122	0.0406667	5.37037	4.2963	2.83721	0.295	0.116	0.199	0.203333	0.227	0.138	0.17	0.178333	0.172	0.196	0.246	0.141	0.299	0.272	0.237333	0.113	0.176	0.278	0.189	0.877049	0.796348	1101.71	464.403	531.332	Ssa13008562,Binds to the 23S rRNA,Ribosomal_L37e
Ssa09025854	0.017	0.019	0.086	0.0406667	0	0.058	0.597	0.218333	0.054	0.322	0.275	0.217	0.038	0.035	0.03	0.0343333	0.08	0.016	0.038	0.0446667	5.36885	5.33607	1.30097	0.03	0.029	0.07	0.043	0.02	0.021	0.042	0.0276667	0.107	0.052	0.171	0.052	0.135	0.206	0.131	0.052	0.036	0.047	0.045	0.643411	0.343511	1.757	1.801	2.148	Ssa04014783,TMV resistance protein N-like,"NB-ARC,TIR"
Ssa13008093	0.017	0.038	0.1	0.0516667	0.043	0.115	0.674	0.277333	0.106	0.283	0.182	0.190333	0	0.126	0.119	0.0816667	0.032	0.062	0.075	0.0563333	5.36774	3.68387	0.689796	0	0	0	0	0	0	0	0	0	0.069	0	0	0	0	0	0	0	0	0	#DIV/0!	#DIV/0!	0	0	0	Ssa05016355,zpr3 zpr3 (little zipper 3),-
Ssa04015468	0	0	0.082	0.0273333	0.167	0.083	0.19	0.146667	0.46	0	0.15	0.203333	0.219	0.199	0.172	0.196667	0.182	0.089	0	0.0903333	5.36585	7.43902	0.459322	0.087	0.082	0	0.0563333	0	0.244	0.121	0.121667	0	0	0	0	0	0	0	0	0	0	0	2.15976	#DIV/0!	0.104	0.416	0.443	Ssa02011840,Indole-3-acetic acid-amido synthetase,GH3
Ssa01000668	2.058	0.526	10.273	4.28567	7.696	18.44	42.748	22.9613	1.55	23.057	22.106	15.571	0.972	0.456	2.358	1.262	8.78	1.194	1.269	3.74767	5.3577	3.63327	2.96962	0.246	0.033	0.041	0.106667	0	0.099	0.146	0.0816667	0.082	9.295	0.441	0.969	0.039	0.043	0.350333	0.202	0.252	0.253	0.235667	0.765625	0.672693	3.121	2.579	2.336	Ssa08022965,Afadin- and alpha-actinin-binding,ADIP
Ssa07019929	0.972	0.378	4.855	2.06833	4.359	8.79	20.079	11.076	21.837	17.235	25.511	21.5277	11.068	12.293	15.687	13.016	21.018	14.523	5.342	13.6277	5.35504	10.4082	1.04699	4.265	0.704	0.064	1.67767	0.146	0.039	0.038	0.0743333	0.869	8.09	1.208	0.916	1.066	1.828	1.27	3.754	3.252	4.045	3.68367	0.0443076	2.90052	0	0	0	Ssa07020016,Jacalin-like lectin domain,Jacalin
Ssa06017735	0.091	0.205	0.506	0.267333	0.059	0.372	3.857	1.42933	0.543	0.242	0.301	0.362	0.077	0.11	0.344	0.177	0.065	0	0	0.0216667	5.34663	1.35411	0.122411	0.267	0.117	0.167	0.183667	0.081	0.087	0.114	0.094	0	0.023	0.18	0.071	0	0	0.0236667	0	0	0	0	0.511797	0	0.079	0.016	0	Ssa05017214,Sorting nexin C terminal,"Nexin_C,PX,PXA"
Ssa12007905	1.649	1.021	0.912	1.194	6.361	7.392	5.384	6.379	12.335	8.428	8.132	9.63167	12.828	8.262	8.654	9.91467	3.348	2.799	2.698	2.94833	5.34255	8.06672	0.297371	0.532	0.329	0.284	0.381667	4.869	4.772	4.401	4.68067	11.486	6.805	4.207	6.576	4.799	3.574	4.983	0.563	0.83	1.114	0.835667	12.2638	0.167704	119.76	54.695	72.685	Ssa13008107,Mitochondrial ribosomal subunit S27,MRP-S33
Ssa13008700	0.921	1.213	0.132	0.755333	1.867	4.769	5.463	4.033	0	3.108	1.917	1.675	0.175	1.91	1.781	1.28867	0	0.143	0.519	0.220667	5.33936	2.21756	0.171236	0.278	0.263	0.483	0.341333	0	0.195	0	0.065	0.975	1.583	0.523	0.479	0.461	0.342	0.427333	1.274	1.658	2.142	1.69133	0.19043	3.95788	2.439	17.403	8.078	Ssa13009278,Belongs to the Ca(2 ) cation antiporter (CaCA) (TC 2.A.19) family,Na_Ca_ex
Ssa11004979	0.032	0	0.055	0.029	0.056	0.249	0.159	0.154667	0	0	0	0	0	0	0	0	0	0	0.036	0.012	5.33333	0	#DIV/0!	0	0	0	0	0	0	0	0	0	0	0	0	0	0	0	0	0	0	0	#DIV/0!	#DIV/0!	0.228	7.29	0.624	Ssa02010748,-,-
Ssa08022865	0	0	0.112	0.0373333	0.016	0.048	0.533	0.199	0.03	1.129	1.059	0.739333	0.106	0	0	0.0353333	0.177	0.173	0.628	0.326	5.33036	19.8036	9.22642	0.774	0.303	0.234	0.437	0	0	0.093	0.031	0.079	1.266	0.084	0	0.112	0.041	0.051	2.816	3.013	1.626	2.485	0.0709382	48.7255	2.153	1.669	2.735	Ssa04014336,DCD (Development and cell death) domain protein,"Dev_Cell_Death,Kelch_1,Kelch_5"
Ssa10004425	5.02	11.929	12.041	9.66333	37.408	50.61	66.506	51.508	15.932	12.768	16.152	14.9507	17.52	14.332	24.574	18.8087	7.203	8.092	7.676	7.657	5.33025	1.54715	0.4071	4.546	4.235	3.323	4.03467	31.605	28.341	46.01	35.3187	23.523	20.697	48.378	57.394	28.476	18.636	34.8353	3.611	6.596	7.504	5.90367	8.7538	0.169474	1.003	1.558	0.519	Ssa08023439,Galactinol--sucrose galactosyltransferase-like,Raffinose_syn
Ssa09025791	0.223	0.353	0.48	0.352	0.816	1.582	3.227	1.875	0.428	1.191	0.785	0.801333	0.127	0.278	0.319	0.241333	0.106	0.062	0	0.056	5.3267	2.27652	0.232044	0	0	0	0	0	0	0	0	0	0.046	0.051	0	0	0	0	0	0	0	0	#DIV/0!	#DIV/0!	2.164	1	2.387	Ssa01002265,WAT1-related protein,EamA
Ssa04015460	0.185	0	0.159	0.114667	0	0	1.83	0.61	0.295	0.592	0.722	0.536333	0	0	0.33	0.11	0	0	0	0	5.31977	4.67733	0	0	0	0	0	0	0	0	0	0	0	0	0	0	0	0	0	0	0	0	#DIV/0!	#DIV/0!	19.263	15.262	11.046	Ssa04015355,Thioesterase superfamily,4HBT
Ssa11006125	3.038	1.453	3.438	2.643	16.964	18.733	6.363	14.02	1.826	2.591	3.07	2.49567	1.586	1.013	0.798	1.13233	30.731	18.014	10.996	19.9137	5.30458	0.944255	17.5864	9.094	20.852	26.744	18.8967	10.23	10.145	10.065	10.1467	2.537	4.02	7.023	3.196	4.299	0.796	2.76367	3.562	4.326	6.721	4.86967	0.536955	1.76203	109.002	85.066	98.891	Ssa01001639,Mitochondrial outer membrane protein porin of 34,Porin_3
Ssa13009062	3.007	1.737	1.952	2.232	12.513	15.7	7.289	11.834	3.923	5.874	5.432	5.07633	4.233	3.778	5.003	4.338	4.624	5.753	3.338	4.57167	5.30197	2.27434	1.05387	0.707	0.532	0.53	0.589667	0.385	0.526	0.404	0.438333	0.827	1.563	0.756	0.859	0.943	0.742	0.848	0.739	1.017	0.876	0.877333	0.743358	1.03459	25.077	49.166	49.6	Ssa02009791,Belongs to the argonaute family,"ArgoL1,ArgoL2,ArgoMid,ArgoN,Gly-rich_Ago1,PAZ,Piwi"
Ssa01001794	0.395	0.279	0.424	0.366	1.115	1.278	3.416	1.93633	13.157	2.183	1.58	5.64	5.278	3.685	2.225	3.72933	0.398	0.942	0.306	0.548667	5.29053	15.4098	0.147122	0	0	0	0	0	0	0	0	0	0	0	0.051	0	0	0.017	0	0	0	0	#DIV/0!	0	21.999	9.274	12.027	Ssa09024348,zinc finger CCCH domain-containing protein,"RRM_1,zf-CCCH"
Ssa04014566	0.087	0.025	0.429	0.180333	0.019	0.863	1.977	0.953	0.278	0.139	0.119	0.178667	0.025	0.045	0.116	0.062	0.248	0.02	0.049	0.105667	5.28466	0.990758	1.7043	0.098	0.298	0.296	0.230667	0.156	0.055	0.191	0.134	0.023	0	0.025	0.045	0.087	0	0.044	0.023	0.023	0.081	0.0423333	0.580925	0.962121	1.376	0.732	0.418	Ssa09024624,NAD(P)H-quinone oxidoreductase subunit N,NdhN
Ssa04014357	0.185	0	0.318	0.167667	0.322	0.32	2.013	0.885	10.341	1.381	1.878	4.53333	2.106	1.663	2.313	2.02733	0	0.345	0.626	0.323667	5.27833	27.0378	0.159651	0	0	0	0	0	0	0	0	0	0	0.21	0	0.185	0.206	0.130333	0	0	0	0	#DIV/0!	0	9.079	7.902	9.429	Ssa03012235,Bifunctional nuclease,"DNase-RNase,UVR"
Ssa11005120	0	0	0.277	0.0923333	0.112	0.39	0.957	0.486333	1.751	0.138	0.403	0.764	0.073	0	0.058	0.0436667	0.061	0.12	0.073	0.0846667	5.26715	8.27437	1.93893	0.058	0.055	0	0.0376667	0.386	0.493	0.73	0.536333	0.205	0.133	0.733	0.604	0.259	0.144	0.335667	0.938	1.046	0.961	0.981667	14.2389	2.92453	11.507	13.476	9.639	Ssa08022413,U-box domain-containing protein,Arm
Ssa01000380	0	0	0.098	0.0326667	0	0.346	0.17	0.172	0.183	0.122	0.357	0.220667	0.195	0	0	0.065	0.163	0.16	0.322	0.215	5.26531	6.7551	3.30769	0.052	0	0	0.0173333	0.068	0	0.216	0.0946667	1.515	0.413	0.585	0.832	0.573	0.064	0.489667	1.069	0.371	0.905	0.781667	5.46154	1.59632	16.674	28.977	38.294	Ssa07020589,-,-
Ssa08022663	0.299	0.075	1.784	0.719333	0.188	0.761	10.406	3.785	0.663	2.906	2.726	2.09833	0.095	0.965	0.564	0.541333	0.458	0.294	0.375	0.375667	5.26182	2.91705	0.693966	0	0.014	0	0.00466667	0	0	0	0	0.035	0.394	0.019	0	0	0	0	0	0	0	0	0	#DIV/0!	1.007	3.232	1.203	Ssa07021083,serine threonine-protein kinase,"EDR1,Pkinase_Tyr"
Ssa05017236	13.979	11.053	9.456	11.496	56.352	61.859	63.258	60.4897	3.348	62.589	61.678	42.5383	2.784	50.144	58.834	37.254	1.494	1.953	0.394	1.28033	5.2618	3.70027	0.0343677	1.108	1.499	1.1	1.23567	3.139	0.89	1.757	1.92867	10.737	10.818	8.137	11.265	5.955	7.009	8.07633	0.907	1.511	2.603	1.67367	1.56083	0.207231	33.657	11.314	18.68	Ssa10003629,CST complex subunit,Ten1_2
Ssa07021208	0.046	0	0.092	0.046	0.04	0.053	0.633	0.242	0.122	0.211	0.178	0.170333	0.017	0.116	0.041	0.058	0.029	0.043	0.154	0.0753333	5.26087	3.7029	1.29885	0	0.013	0	0.00433333	0	0.058	0	0.0193333	0	0.031	0	0	0	0	0	0	0.033	0.043	0.0253333	4.46154	#DIV/0!	287.157	154.148	198.889	Ssa01002335,CS domain,CS
Ssa06019261	0.025	0.029	0	0.018	0	0.109	0.175	0.0946667	0.121	0.135	0.297	0.184333	0.029	0.018	0.113	0.0533333	0	0.047	0.029	0.0253333	5.25926	10.2407	0.475	0.023	0	0.027	0.0166667	0.061	0.064	0.064	0.063	0.054	0.078	0.201	0.079	0.127	0	0.0686667	0.026	0	0	0.00866667	3.78	0.126214	108.409	54.374	46.347	Ssa06019664,DNA polymerase delta subunit,DNA_pol_delta_4
Ssa05016022	0	0.212	0	0.0706667	0	0	1.114	0.371333	0	1.201	0.293	0.498	0	0	0	0	0	0	0	0	5.25472	7.04717	#DIV/0!	0	0	0	0	0	0	0	0	0	0	0	0	0	0	0	0	0	0	0	#DIV/0!	#DIV/0!	0	0	0	Ssa03013564,Anaphase-promoting complex subunit 11 RING-H2 finger,zf-RING_2
Ssa02010372	2.097	5.921	2.251	3.423	38.277	13.579	2.074	17.9767	73.246	31.294	33.568	46.036	490.428	42.774	36.752	189.985	36.854	20.755	20.972	26.1937	5.25173	13.449	0.137873	0	0	0	0	0.314	0	0	0.104667	0	2.975	0	0.273	0.525	0.584	0.460667	2.449	5.666	5.612	4.57567	#DIV/0!	9.93271	25.232	12.38	9.505	Ssa09025872,U3 small nucleolar RNA-associated protein,"BING4CT,WD40"
Ssa10003661	0.024	0	0.061	0.0283333	0	0	0.445	0.148333	0	0.076	0.056	0.044	0.054	0	0	0.018	0	0.022	0	0.00733333	5.23529	1.55294	0.407407	0.15	0.081	0.671	0.300667	0	0	0.119	0.0396667	0.678	0.391	0.996	0	0.024	0	0.008	1.353	1.127	0.904	1.128	0.131929	141	6.502	13.802	13.117	Ssa13008706,"Chaperone protein dnaJ 8, chloroplastic-like",DnaJ
Ssa11006380	0	0.038	0.057	0.0316667	0	0	0.496	0.165333	0.748	0	0.026	0.258	0.038	0	0	0.0126667	0	0	0	0	5.22105	8.14737	0	0	0	0	0	0	0	0	0	0	0	0	0	0	0	0	0	0	0	0	#DIV/0!	#DIV/0!	62.504	44.957	61.86	Ssa10003139,Haloacid dehalogenase-like hydrolase,"HAD_2,Hydrolase,Hydrolase_like"
Ssa13009193	0.026	1.113	0.869	0.669333	0.135	0.022	10.315	3.49067	0.746	0	0.122	0.289333	0.089	4.484	0.927	1.83333	1.38	0.048	3.917	1.78167	5.21514	0.432271	0.971818	1.104	0.334	0.463	0.633667	0	0.066	0.13	0.0653333	0.027	0.027	0.236	0.027	0	0	0.009	0.162	0.505	0.58	0.415667	0.103104	46.1852	65.895	44.689	209.692	Ssa09025793,Introduction of a cis double bond between carbons of the acyl chain,FA_desaturase_2
Ssa08022691	1.901	2.254	9.516	4.557	16.506	22.679	32.109	23.7647	27.549	14.438	23.939	21.9753	11.487	15.939	21.152	16.1927	8.362	11.043	8.332	9.24567	5.21498	4.82232	0.570979	2.678	1.389	1.133	1.73333	7.421	8.335	5.135	6.96367	3.705	16.445	6.878	5.028	1.67	0.68	2.45933	7.334	7.103	3.146	5.861	4.0175	2.38317	1.854	1.479	1.408	Ssa05016231,COPI associated protein,COPI_assoc
Ssa08023525	0.072	0.108	0.267	0.149	0.146	0.454	1.727	0.775667	0.458	1.173	1.42	1.017	0.082	0.281	0.278	0.213667	0.159	0.156	0.135	0.15	5.20582	6.8255	0.702028	0.108	0.021	0.05	0.0596667	0	0.061	0.03	0.0303333	0.076	0.173	0.054	0.025	0.024	0.107	0.052	0	0	0.045	0.015	0.50838	0.288462	29.097	21.335	24.241	Ssa04015361,Transcription factor bHLH68-like,-
Ssa09025421	1.824	1.706	1.345	1.625	5.989	13.137	6.249	8.45833	4.147	20.933	27.633	17.571	4.025	6.713	8.62	6.45267	7.998	4.496	3.321	5.27167	5.20513	10.8129	0.816975	1.685	1.327	0.967	1.32633	2.846	2.087	4.053	2.99533	11.123	34.535	8.724	16.874	5.668	7.019	9.85367	11.033	5.156	3.755	6.648	2.25836	0.674673	23.714	18.64	28.667	Ssa09024134,60s ribosomal protein,Ribosomal_L18A
Ssa07020492	0.914	0.814	1	0.909333	3.035	5.288	5.866	4.72967	9.027	6.883	5.129	7.013	3.501	4.656	6.658	4.93833	3.159	2.866	2.717	2.914	5.20125	7.71224	0.590078	0	0.095	0.116	0.0703333	0.133	0.212	0.07	0.138333	0.352	0.372	0.283	0.231	0.25	0.463	0.314667	0.144	0.24	0.181	0.188333	1.96682	0.598517	2.365	4.852	1.909	Ssa01001841,receptor-like protein kinase,"GUB_WAK_bind,Pkinase,Pkinase_Tyr,WAK_assoc"
Ssa10003293	1.573	0	0	0.524333	1.367	1.358	5.444	2.723	0	3.353	8.597	3.98333	4.475	19.031	13.343	12.283	0	0	0.886	0.295333	5.19326	7.59695	0.0240441	0.712	1.349	0.825	0.962	1.883	0	0	0.627667	2.499	5.679	1.786	6.541	14.974	8.761	10.092	0.816	5.099	2.928	2.94767	0.65246	0.29208	0.084	0.101	0.038	Ssa09023948,Belongs to the peptidase S10 family,Peptidase_S10
Ssa09025429	3.252	2.317	4.389	3.31933	31.732	16.913	2.987	17.2107	0.989	2.724	2.781	2.16467	1.939	0.294	0.069	0.767333	2.538	1.154	0.218	1.30333	5.18498	0.652139	1.69852	0.841	1.262	0.163	0.755333	0.371	6.208	1.119	2.566	0.492	5.352	0.396	0.201	0.776	0.129	0.368667	2.411	1.046	1.622	1.693	3.39718	4.59222	33.664	13.18	9.907	Ssa06018650,Mitochondrial domain of unknown function (DUF1713),DUF1713
Ssa01000725	0.572	0.298	0.227	0.365667	1.224	1.329	3.133	1.89533	1.475	0.657	0.447	0.859667	0.701	0.487	1.179	0.789	37.864	20.122	13.087	23.691	5.18323	2.35096	30.0266	0.04	0	0.046	0.0286667	0	0	0	0	0	0.045	0	0	0	0	0	0	0.048	0	0.016	0	#DIV/0!	5.578	10.777	9.142	Ssa07020171,cationic amino acid transporter,"AA_permease_2,AA_permease_C"
Ssa03013715	0.251	0.022	0.166	0.146333	0.872	0.6	0.802	0.758	0.123	0.658	0.437	0.406	0.11	0.254	0.293	0.219	0.275	0.144	0.174	0.197667	5.17995	2.77449	0.902588	0.017	0.066	0.041	0.0413333	0.046	0	0.073	0.0396667	0.409	0.139	0.044	0.181	0.077	0.129	0.129	0.04	0.042	0.072	0.0513333	0.959677	0.397933	1.607	3.315	5.775	Ssa13008867,LRR receptor-like serine threonine-protein kinase,"LRRNT_2,LRR_1,LRR_6,LRR_8"
Ssa13008646	3.685	3.78	8.114	5.193	30.378	30.651	19.609	26.8793	21.917	7.632	13.53	14.3597	9.353	7.118	9.609	8.69333	8.773	7.577	3.771	6.707	5.17607	2.7652	0.771511	4.334	4.179	0.8	3.10433	3.551	5.23	7.722	5.501	5.789	7.605	9.959	5.462	4.076	2.454	3.99733	11.301	15.978	19.006	15.4283	1.77204	3.85966	1.045	2.204	2.177	Ssa13009321,pfkB family carbohydrate kinase,"PfkB,SOUL"
Ssa09025503	166.445	54.748	436.504	219.232	40.716	1004.09	2356.64	1133.82	1833.42	557.849	687.106	1026.12	155.758	745.988	587.189	496.312	73.866	131.245	88.281	97.7973	5.17176	4.68053	0.197048	0.164	0.155	0.285	0.201333	1.138	1.786	0.797	1.24033	0.192	7.425	0.257	0.8	0.272	0.655	0.575667	0.47	0.147	0.253	0.29	6.1606	0.503764	387.063	281.821	391.083	Ssa01001129,Zinc finger A20 and AN1 domain-containing stress-associated protein,"zf-A20,zf-AN1"
Ssa04015643	0.491	0.111	0.507	0.369667	0.598	2.122	3.014	1.91133	8.789	2.62	3.07	4.82633	2.573	4.486	5.179	4.07933	4.669	4.029	1.218	3.30533	5.17042	13.0559	0.810263	0	0	0	0	0	0	0	0	0	0	0	0	0	0	0	0	0	0	0	#DIV/0!	#DIV/0!	0.277	2.154	0.69	Ssa02011114,Pentatricopeptide repeat-containing protein,"PPR,PPR_1,PPR_2,PPR_3"
Ssa09025936	11.877	11.86	13.515	12.4173	49.705	58.756	84.005	64.1553	161.089	151.186	146.847	153.041	99.188	123.966	142.734	121.963	26.305	25.894	24.51	25.5697	5.1666	12.3248	0.209652	24.96	19.828	9.22	18.0027	17.486	14.513	24.245	18.748	142.721	133.196	124.443	119.675	95.816	89	101.497	37.225	33.183	22.596	31.0013	1.0414	0.305441	14.652	16.481	21.882	Ssa07020668,Neutral ceramidase-like,"Ceramidase_alk,Ceramidse_alk_C"
Ssa12007407	0.093	0.105	1.758	0.652	0.291	0.241	9.572	3.368	0.327	13.967	6.191	6.82833	0.191	0.721	0.199	0.370333	0.866	0.347	0.482	0.565	5.16564	10.4729	1.52565	0	0	0	0	0	0	0	0	0	0.173	0	0	0	0	0	0	0	0	0	#DIV/0!	#DIV/0!	54.674	49.1	50.374	Ssa05015978,WD40 repeats,"DUF2415,WD40"
Ssa09023979	0.843	0.04	6.43	2.43767	5.896	14.14	17.728	12.588	25.927	5.882	14.655	15.488	6.2	14.678	17.011	12.6297	3.038	3.765	0.475	2.426	5.16395	6.35362	0.192087	1.337	0.633	1.254	1.07467	2.062	1.431	2.209	1.90067	3.649	10.008	26.063	12.46	5.248	2.075	6.59433	12.075	13.37	12.922	12.789	1.76861	1.93939	33.022	11.178	22.642	Ssa04014458,-,-
Ssa05017341	0	0	0.055	0.0183333	0.111	0.11	0.063	0.0946667	0.051	0	0.025	0.0253333	0.036	0.022	0	0.0193333	0	0.03	0.108	0.046	5.16364	1.38182	2.37931	0.029	0.027	0.033	0.0296667	0.038	0.041	0.12	0.0663333	0.101	0.131	0.145	0.033	0.064	0.035	0.044	0.198	0.172	0.178	0.182667	2.23596	4.15152	0	0	0	Ssa03012351,Zinc-finger homeodomain protein,ZF-HD_dimer
Ssa04015690	0.064	0	0.658	0.240667	0.167	1.158	2.4	1.24167	12.442	1.43	2.593	5.48833	2.471	1.678	2.053	2.06733	1.153	1.309	0.216	0.892667	5.15928	22.8047	0.431796	1.504	0.767	1.273	1.18133	1.606	3.251	3.212	2.68967	2.03	6.919	13.781	6.64	2.24	5.621	4.83367	8.95	14.081	17.597	13.5427	2.27681	2.80174	1.459	7.925	3.281	Ssa09025445,SWIM zinc finger family protein,"MULE,SWIM"
Ssa08021931	0.658	0.495	0.717	0.623333	4.148	2.371	3.108	3.209	1.867	2.883	2.788	2.51267	1.545	1.133	1.212	1.29667	0.962	0.953	0.894	0.936333	5.14813	4.03102	0.722108	0.293	0.233	0.164	0.23	0.163	0.213	0.118	0.164667	0.398	0.312	0.166	0.185	0.22	0.279	0.228	0.52	0.914	0.914	0.782667	0.715942	3.43275	1.309	1.286	0.306	Ssa07020930,Protein kinase domain,"LysM,Pkinase,Pkinase_Tyr"
Ssa12006883	0.251	0.035	0.296	0.194	0.873	1.192	0.931	0.998667	1.954	0.736	1.348	1.346	1.535	0.412	0.476	0.807667	1.997	1.491	0.389	1.29233	5.14777	6.93814	1.60008	0.028	0.135	0.033	0.0653333	0.075	0.04	0	0.0383333	0	0.291	0.178	0.033	0.094	0.035	0.054	0	0	0	0	0.586735	0	19.3	18.731	15.322	Ssa08022951,plasma membrane ATPase,"Cation_ATPase_N,E1-E2_ATPase,Hydrolase"
Ssa07020384	0.125	0.101	0.123	0.116333	0.544	0.649	0.602	0.598333	0.143	1.297	1.747	1.06233	0.306	0.507	0.448	0.420333	0.323	0.283	0.182	0.262667	5.14327	9.13181	0.624901	0.146	0.123	0.056	0.108333	0.343	0.228	0.81	0.460333	3.432	11.874	2.5	3.777	1.238	0.578	1.86433	1.412	1.025	0.416	0.951	4.24923	0.510102	1.925	2.19	1.437	Ssa04015231,BED zinc finger,"DUF4413,Dimer_Tnp_hAT,zf-BED"
Ssa06019715	0	0.098	0	0.0326667	0.075	0	0.429	0.168	0	1.665	0.271	0.645333	0.099	0.48	0.542	0.373667	1.566	0.081	1.076	0.907667	5.14286	19.7551	2.42908	0	0	0	0	0	0	0	0	0.092	0.358	0	0	0	0	0	7.566	1.969	1.777	3.77067	#DIV/0!	#DIV/0!	0	0	0	Ssa05016361,Belongs to the iron ascorbate-dependent oxidoreductase family,"2OG-FeII_Oxy,DIOX_N"
Ssa02011988	0.189	0.16	2.377	0.908667	0.473	2.144	11.368	4.66167	2.115	4.664	5.448	4.07567	0.054	1.521	2.64	1.405	0.247	0.11	0.027	0.128	5.13023	4.48533	0.0911032	3.662	0.771	0.62	1.68433	0.283	0.271	0.327	0.293667	0.601	1.44	0.564	0.836	0.545	0.553	0.644667	0.417	0.281	0.154	0.284	0.174352	0.440538	6.965	6.834	5.069	Ssa09025057,Exonuclease mut-7 homolog,"DNA_pol_A_exo1,Mut7-C"
Ssa02011564	0.451	0.51	1.096	0.685667	2.073	4.43	4.042	3.515	6.731	1.883	2.778	3.79733	2.259	2.612	2.544	2.47167	1.47	0.829	0.45	0.916333	5.1264	5.53816	0.370735	3.864	3.163	4.518	3.84833	1.003	0.902	2.301	1.402	1.598	2.115	1.405	2.466	2.338	1.336	2.04667	1.632	1.337	1.836	1.60167	0.364314	0.782573	2.276	1.129	2.298	Ssa03013771,"Photosystem II (PSII) is a light-driven water plastoquinone oxidoreductase that uses light energy to abstract electrons from H(2)O, generating O(2) and a proton gradient subsequently used for ATP formation. It consists of a core antenna complex that captures photons, and an electron transfer chain that converts photonic excitation into a charge separation. The D1 D2 (PsbA PsbA) react…
Ssa03013554	21.708	6.851	17.951	15.5033	79.112	93.645	65.606	79.4543	9.59	31.529	27.13	22.7497	26.007	20.016	26.28	24.101	36.315	42.686	30.623	36.5413	5.12498	1.4674	1.51617	9.108	7.857	9.012	8.659	2.661	2.713	4.19	3.188	10.497	12.083	6.786	4.308	4.243	1.84	3.46367	11.782	5.484	7.016	8.094	0.368172	2.33683	0.073	0.253	0.044	Ssa02011002,Pentatricopeptide repeat-containing protein,"DYW_deaminase,PPR,PPR_2,PPR_3"
Ssa10004767	0.08	0	0.396	0.158667	0.087	0.398	1.942	0.809	0.256	0.662	0.907	0.608333	0.182	0.637	0.573	0.464	0.228	0.112	0.045	0.128333	5.09874	3.83403	0.27658	0.018	0	0	0.006	0.072	0.051	0.201	0.108	0.191	0.331	0.114	0.167	0.04	0.179	0.128667	0.166	0.195	0.149	0.17	18	1.32124	64.012	84.917	93.968	Ssa09025577,Histidine phosphatase superfamily (branch 1),His_Phos_1
Ssa07020265	37.439	45.659	28.137	37.0783	185.855	201.792	178.758	188.802	23.736	83.353	77.962	61.6837	40.12	69.743	114.005	74.6227	35.039	30.43	19.613	28.3607	5.09197	1.6636	0.380054	33.08	40.736	34.744	36.1867	203.121	145.069	143.787	163.992	187.19	144.961	55.567	121.173	128.737	73.826	107.912	57.414	43.411	68.186	56.337	4.53184	0.522064	89.21	70.698	81.467	Ssa01002251,Belongs to the short-chain dehydrogenases reductases (SDR) family,adh_short
Ssa03012229	5.323	3.826	3.221	4.12333	16.439	25.8	20.7	20.9797	42.112	27.469	23.019	30.8667	29.464	12.436	12.569	18.1563	9.807	10.293	7.089	9.063	5.08804	7.48585	0.499165	0.219	0.381	0.127	0.242333	4.298	5.543	3.295	4.37867	9.868	4.161	1.511	0.922	1.415	8.177	3.50467	0.921	0.436	0.375	0.577333	18.0688	0.164733	4.007	7.672	8.305	Ssa12006632,Belongs to the TRAFAC class myosin-kinesin ATPase superfamily. Kinesin family,Kinesin
Ssa13008760	21.979	6.817	18.003	15.5997	78.903	93.49	65.695	79.3627	9.638	31.497	27.083	22.7393	26.007	19.974	26.2	24.0603	36.286	42.798	30.454	36.5127	5.08746	1.45768	1.51755	9.054	7.96	8.886	8.63333	2.589	2.713	4.19	3.164	10.561	12.114	6.718	4.308	4.153	1.84	3.43367	11.813	5.484	7.211	8.16933	0.366486	2.37919	14.619	11.165	7.668	Ssa02010289,zinc finger,"RRM_1,zf-CCHC"
Ssa04014676	0.043	0.049	0.092	0.0613333	0.056	0.222	0.658	0.312	0.343	0.023	0.168	0.178	0.073	0.119	0.077	0.0896667	0.02	0.12	0	0.0466667	5.08696	2.90217	0.520446	0.117	0.221	0.158	0.165333	0.077	0.055	0.081	0.071	0.136	0.089	0.122	0.201	0.151	0.048	0.133333	0.045	0.093	0.06	0.066	0.429435	0.495	0	0.033	0	Ssa12007764,Salicylate,Methyltransf_7
Ssa09025557	0.282	0.137	0.45	0.289667	1.262	1.358	1.795	1.47167	0.451	0.559	0.315	0.441667	0.826	0.502	0.576	0.634667	0.153	0.225	0.091	0.156333	5.08055	1.52474	0.246324	0.037	0.277	0.254	0.189333	0.097	0.051	1.318	0.488667	1.88	0.416	2.244	3.354	2.546	0.719	2.20633	0	0.044	0.075	0.0396667	2.58099	0.0179785	48.925	14.846	108.472	Ssa06018100,Myb/SANT-like DNA-binding domain,Myb_DNA-bind_4
Ssa02010055	32.744	35.722	32.79	33.752	179.999	211.16	123.163	171.441	2070.67	926.433	577.313	1191.47	654.656	176.736	177.238	336.21	72.453	75.14	65.258	70.9503	5.07942	35.3008	0.21103	2.887	2.957	3.798	3.214	331.055	345.273	224.578	300.302	671.899	340.99	115.875	45.158	27.811	484.567	185.845	51.702	52.713	42.434	48.9497	93.4356	0.263389	4.159	7.505	6.069	Ssa08023445,amine oxidase,"Cu_amine_oxid,Cu_amine_oxidN2,Cu_amine_oxidN3"
Ssa02011837	0.951	2.479	9.299	4.243	13.607	18.947	31.979	21.511	76.039	22.301	31.645	43.3283	40.793	28.477	40.698	36.656	23.627	31.414	33.137	29.3927	5.06976	10.2117	0.801851	30.865	32.569	39.84	34.4247	117.468	110.697	262.541	163.569	103.838	66.946	345.503	139.941	163.267	131.7	144.969	173.42	138.109	138.834	150.121	4.7515	1.03554	14.394	8.967	8.136	Ssa02010903,transcription,Myb_DNA-binding
Ssa02010573	0	0	0.09	0.03	0.018	0.145	0.291	0.151333	2.553	0.135	0.476	1.05467	0	0.029	0.019	0.016	0.06	0.059	0	0.0396667	5.04444	35.1556	2.47917	0.019	0.162	0	0.0603333	0	0.134	0.291	0.141667	0.802	4.385	0.55	0.263	0.084	0	0.115667	0.284	0.432	0.685	0.467	2.34807	4.03746	8.07	15.196	11.765	Ssa11005076,Belongs to the peptidase A1 family,"TAXi_C,TAXi_N"
Ssa11006063	0	0	0.24	0.08	0.041	0.201	0.968	0.403333	0.595	0.646	0.327	0.522667	0.159	0.226	0.042	0.142333	0.443	0.087	0.263	0.264333	5.04167	6.53333	1.85714	0.042	0.2	0.245	0.162333	0.112	0	0	0.0373333	0.148	0.24	0.159	0.048	0.093	0.052	0.0643333	0	0	0.087	0.029	0.229979	0.450777	64.561	75.509	129.7	Ssa11005556,protein phosphatase 2C 15,PP2C
Ssa02012017	0.192	0.217	0.33	0.246333	0.334	0.539	2.85	1.241	0.537	5.58	5.1	3.739	0.219	0.731	0.3	0.416667	2.737	0.76	1.191	1.56267	5.03789	15.1786	3.7504	0.609	0.124	0.05	0.261	0	0.061	0	0.0203333	0.203	1.734	0.273	0.35	0.096	0	0.148667	0.15	0.104	0.089	0.114333	0.0779055	0.769058	0.921	1.383	0.444	Ssa11006101,26S proteasome non-ATPase regulatory subunit,PCI
Ssa11005130	1.244	1.874	1.346	1.488	7.131	11.102	4.239	7.49067	0.442	2.112	2.195	1.583	1.941	3.569	3.128	2.87933	3.284	1.889	1.922	2.365	5.03405	1.06384	0.821371	1.168	1.265	0.919	1.11733	5.133	3.695	3.998	4.27533	11.424	7.133	2.879	7.427	7.298	3.594	6.10633	4.353	3.536	2.831	3.57333	3.82637	0.585185	286.625	288.055	338.869	Ssa13009423,Belongs to the synaptobrevin family,"Longin,Synaptobrevin"
Ssa03012474	0.227	1.024	0.292	0.514333	0.985	1.174	5.605	2.588	0.181	3.021	2.921	2.041	0	1.646	2.733	1.45967	0.108	0	0.128	0.0786667	5.03176	3.96824	0.0538936	4.824	2.723	2.498	3.34833	0.543	0.433	0	0.325333	0.961	4.327	0.129	1.414	0.909	0.631	0.984667	0.941	1.837	1.477	1.41833	0.0971628	1.44042	0.184	0.183	0.251	Ssa08023057,Belongs to the peptidase S10 family,Peptidase_S10
Ssa05017327	14.242	2.949	27.424	14.8717	109.259	90.286	24.888	74.811	12.13	10.881	14.459	12.49	37.689	7.222	8.586	17.8323	22.214	10.836	12.974	15.3413	5.03044	0.839852	0.86031	0.322	0.815	0.872	0.669667	7.249	5.59	2.387	5.07533	1.635	0.367	5.662	0.247	0.357	0	0.201333	0	0	0.221	0.0736667	7.57889	0.365894	311.53	275.36	367.116	Ssa05016915,Belongs to the GRAS family,GRAS
Ssa01001683	0.441	0.249	0	0.23	1.343	0.381	1.747	1.157	0.352	1.882	0.689	0.974333	0.754	1.832	1.971	1.519	0.21	0.206	0.249	0.221667	5.03043	4.23623	0.145929	1.199	0.947	1.853	1.333	0.793	0	0	0.264333	0.701	1.139	0	1.836	1.77	0.492	1.366	0.458	0.477	0.411	0.448667	0.1983	0.328453	51.564	38.606	40.547	Ssa08023577,May serve as docking site to facilitate the association of other proteins to the plasma membrane,Rad60-SLD_2
Ssa09025481	0.036	0.103	0.234	0.124333	0.205	0.251	1.419	0.625	0.145	0.213	0.255	0.204333	0	0.301	0.292	0.197667	0.086	0.034	0.061	0.0603333	5.02681	1.64343	0.305228	0.411	0.685	0.533	0.543	0.109	0.116	0.981	0.402	0.231	0.599	1.052	3.115	1.001	0.04	1.38533	0.415	0.275	0.879	0.523	0.740331	0.377526	8.819	19.59	12.947	Ssa04015463,Survival protein SurE,SurE
Ssa04015583	0	0.078	0	0.026	0.06	0.059	0.272	0.130333	19.212	1.392	9.771	10.125	7.903	10.411	4.605	7.63967	0.196	0.512	2.789	1.16567	5.01282	389.423	0.152581	0	0	0	0	0.576	0.438	0.173	0.395667	2.258	1.064	0.547	2.43	2.067	14.018	6.17167	0.143	0.743	0.768	0.551333	#DIV/0!	0.089333	0	0.181	0	Ssa02011723,(-)-germacrene D synthase-like,"Terpene_synth,Terpene_synth_C"
Ssa08022976	0	0.752	0.452	0.401333	0.213	0.03	5.789	2.01067	0.783	0	0.109	0.297333	0.08	0.557	0.532	0.389667	0.266	0.033	1.54	0.613	5.00997	0.740864	1.57314	0	0	0	0	0	0	0	0	0.037	0	0	0	0	0	0	0	0	0	0	#DIV/0!	#DIV/0!	42.929	27.258	45.078	Ssa01000166,Heavy-metal-associated domain,HMA
Ssa08023379	0.02	0.023	0.139	0.0606667	0.07	0.14	0.701	0.303667	0.065	0.324	0.332	0.240333	0.023	0.154	0.054	0.077	0	0.075	0	0.025	5.00549	3.96154	0.324675	0.128	0.017	0.064	0.0696667	0.073	0.026	0.076	0.0583333	0.172	0.46	0.184	0.063	0.162	0.113	0.112667	0.105	0.088	0.038	0.077	0.837321	0.683432	37.189	163.907	68.504	Ssa13009205,WRKY transcription factor,WRKY
Ssa01002794	0.782	0.427	2.275	1.16133	0.241	1.285	15.896	5.80733	2.055	24.26	71.559	32.6247	13.639	0.488	34.317	16.148	1.87	1.575	2.474	1.973	5.00057	28.0924	0.122182	0.206	0.649	0.371	0.408667	0.091	0.289	5.456	1.94533	0.401	3.619	25.874	2.151	4.096	3.964	3.40367	98.995	15.052	24.988	46.345	4.7602	13.6162	19.863	25.779	19.38	Ssa10004883,Enolase 1,"Enolase_C,Enolase_N"
Ssa03013390	6.76	2.121	1.129	3.33667	15.017	18.321	16.716	16.6847	1.199	4.004	1.906	2.36967	0.214	20.776	13.919	11.6363	2.676	0.175	1.27	1.37367	5.0004	0.71019	0.11805	18.194	17.077	12.218	15.8297	5.622	1.195	2.833	3.21667	16.71	21.701	8.531	13.862	1.694	8.369	7.975	0	0.406	11.187	3.86433	0.203205	0.484556	7.259	8.981	8.087	Ssa01000515,Glycosylphosphatidylinositol anchor attachment 1,Gaa1
Ssa05016183	0	0.013	0	0.00433333	0.01	0.01	0.045	0.0216667	0	0.048	0.018	0.022	0	0.031	0.04	0.0236667	0	0.021	0	0.007	5	5.07692	0.295775	0.061	0.078	0.059	0.066	0.014	0	0	0.00466667	0.06	0	0.013	0.106	0.045	0.05	0.067	0.023	0.037	0.032	0.0306667	0.0707071	0.457711	16.456	22.047	19.687	Ssa08023793,Belongs to the TRAFAC class myosin-kinesin ATPase superfamily. Kinesin family,"Kinesin,RRM_1"
Ssa10002908	0.087	0	0.075	0.054	0.075	0.562	0.172	0.269667	0.139	0.37	0.982	0.497	0	0	0.039	0.013	0.041	0.04	0	0.027	4.99383	9.2037	2.07692	0.196	0	0.046	0.0806667	0	0	0	0	0.138	1.612	0.148	0	0	0	0	0.18	0	0	0.06	0	#DIV/0!	33.355	10.264	19.306	Ssa12007065,Belongs to the class I-like SAM-binding methyltransferase superfamily. Cation-independent O- methyltransferase family,"Dimerisation,Methyltransf_2"
Ssa06018211	1.264	0.702	0.783	0.916333	3.513	5.602	4.613	4.576	0.232	1.105	0.567	0.634667	0.472	0.186	1	0.552667	1.004	0.83	0.607	0.813667	4.99382	0.692615	1.47226	0	0	0	0	0	0.026	0	0.00866667	0	0.021	0	0	0	0	0	0	0	0	0	#DIV/0!	#DIV/0!	6.066	2.766	4.935	Ssa12007189,-,-
Ssa12007087	5.005	2.672	5.477	4.38467	13.827	19.477	32.246	21.85	51.786	41.698	48.535	47.3397	36.676	41.223	88.573	55.4907	19.411	25.389	21.055	21.9517	4.98328	10.7966	0.395592	4.625	4.529	5.073	4.74233	27.465	22.253	39.736	29.818	46.886	36.822	101.072	50.508	60.231	78.147	62.962	48.965	45.831	50.42	48.4053	6.28762	0.768802	764.367	232.401	359.3	Ssa08021917,Calcium-binding protein PBP1-like,EF-hand_8
Ssa08023539	0	0	0.435	0.145	0.068	0.404	1.695	0.722333	0.435	0.083	0.335	0.284333	0	0.215	0.104	0.106333	0	0.036	0	0.012	4.98161	1.96092	0.112853	0.035	0.033	0	0.0226667	0	0	0	0	0.124	0.161	0.885	0.04	0	0	0.0133333	0.081	0.042	0.036	0.053	0	3.975	31.954	29.687	30.004	Ssa01002349,Angio-associated migratory cell,WD40
Ssa06018435	1.849	0.509	7.476	3.278	18.227	18.845	11.909	16.327	6.769	9.566	15.107	10.4807	2.925	1.871	2.094	2.29667	71.245	43.647	35.979	50.2903	4.98078	3.19727	21.8971	0.98	1.161	1.278	1.13967	0.432	0.402	0.51	0.448	3.249	18.798	3.175	1.782	1.085	1.206	1.35767	1.545	1.706	1.217	1.48933	0.393097	1.09698	10.911	21.066	18.042	Ssa06017469,Light-inducible protein,"bZIP_1,bZIP_C"
Ssa11005894	0	0	0.079	0.0263333	0	0.027	0.366	0.131	0.197	0.23	0.361	0.262667	0.105	0.064	0.083	0.084	0.059	0	0	0.0196667	4.97468	9.97468	0.234127	0.028	0.079	0.065	0.0573333	0	0.039	0	0.013	0.033	0.064	0.14	0.064	0.062	0.103	0.0763333	0.064	0.033	0.057	0.0513333	0.226744	0.672489	0	0	0	Ssa05016463,Belongs to the 'GDSL' lipolytic enzyme family,Lipase_GDSL
Ssa06018261	0.091	0	0.078	0.0563333	0.236	0.156	0.448	0.28	0.434	0.096	0.353	0.294333	0	0	0	0	0.172	0.084	0	0.0853333	4.97041	5.22485	#DIV/0!	0.082	0	0	0.0273333	0.325	0.115	0.228	0.222667	0.096	0.187	0.103	0	0	0.303	0.101	0	0	0	0	8.14634	0	35.786	49.005	55.508	Ssa03012249,Belongs to the peptidase A1 family,"TAXi_C,TAXi_N"
Ssa03013240	0.534	0.341	1.037	0.637333	2.401	3.147	3.949	3.16567	1.483	2.227	1.65	1.78667	1.03	1.396	1.866	1.43067	1.125	0.951	0.68	0.918667	4.96705	2.80335	0.642125	0.042	0	0.024	0.022	0	0	0	0	0.049	0	0	0.048	0	0.026	0.0246667	0	0	0.022	0.00733333	0	0.297297	3.81	4.216	4.143	Ssa01000767,Random slug protein 5-like,"CRAL_TRIO,CRAL_TRIO_N"
Ssa02010365	21.795	16.441	17.134	18.4567	108.372	92.631	73.864	91.6223	55.056	56.4	54.284	55.2467	71.221	43.971	55.367	56.853	29.581	31.459	23.021	28.0203	4.96419	2.99332	0.492856	29.638	42.002	47.101	39.5803	374.697	288.82	400.927	354.815	268.634	184.302	229.308	277.291	259.858	221.63	252.926	118.194	79.423	90.015	95.8773	8.96442	0.379072	256.687	154.739	186.282	Ssa10002898,RNA-binding protein,RRM_1
Ssa02011197	0.063	0.071	0.161	0.0983333	0.326	0.27	0.867	0.487667	2.199	0.601	0.391	1.06367	1.71	0.909	0.447	1.022	0.357	0.175	0.212	0.248	4.95932	10.8169	0.242661	0.057	0	0	0.019	0	0.08	0	0.0266667	0	0	0.355	0	0.063	0.697	0.253333	0	0	0.058	0.0193333	1.40351	0.0763158	20.791	21.464	97.772	Ssa01001645,2-aminoethanethiol dioxygenase-like,PCO_ADO
Ssa06017983	0.085	0.048	0.183	0.105333	0.408	0.442	0.717	0.522333	0.409	0.273	0.133	0.271667	0.146	0.177	0.229	0.184	0.243	0.079	0.096	0.139333	4.95886	2.57911	0.757246	0.039	0.183	0.313	0.178333	0.255	0.163	0.107	0.175	0.407	0.176	0	0.443	0.171	0.475	0.363	0.089	0	0.04	0.043	0.981308	0.118457	71.607	67.702	85.572	Ssa03012453,ATP-dependent RNA helicase,Helicase_C
Ssa13008604	0.289	0.022	0.166	0.159	0.923	0.633	0.802	0.786	0.123	0.658	0.437	0.406	0.11	0.227	0.258	0.198333	0.275	0.144	0.174	0.197667	4.9434	2.55346	0.996639	0.017	0.066	0.041	0.0413333	0.046	0	0.073	0.0396667	0.409	0.139	0.044	0.161	0.077	0.129	0.122333	0.04	0.042	0.072	0.0513333	0.959677	0.419619	39.942	34.954	26.194	Ssa01001217,ACT domain-containing protein,ACT
Ssa06018901	0.243	0.091	0.765	0.366333	0.422	1.748	3.258	1.80933	1.983	2.475	3.184	2.54733	0.553	1.139	2.387	1.35967	1.488	1.006	0.426	0.973333	4.93904	6.95359	0.715862	0.147	0.139	0	0.0953333	0.129	0.103	0.102	0.111333	0.343	0.446	0.705	0.281	0.595	0.541	0.472333	0.336	0.554	0.704	0.531333	1.16783	1.12491	19.769	15.484	13.473	Ssa12006680,The RING-variant domain is a C4HC3 zinc-finger like motif found in a number of cellular and viral proteins. Some of these proteins have been shown both in vivo and in vitro to have ubiquitin E3 ligase activity.,RINGv
Ssa01000717	0.49	0	1.614	0.701333	0.142	1.763	8.485	3.46333	19.308	3.832	2.552	8.564	0.372	0.282	0.073	0.242333	0.699	1.598	0.368	0.888333	4.93821	12.211	3.66575	0.074	0	0	0.0246667	0	0	0	0	0	0.169	0	0	0	0	0	0	0	0	0	0	#DIV/0!	9.853	9.397	10.661	Ssa07020858,glutaredoxin family,Glutaredoxin
Ssa01002376	0.088	0	0.266	0.118	0.077	0.534	1.137	0.582667	0.212	0.047	0.173	0.144	0.101	0	0.079	0.06	0.042	0	0	0.014	4.93785	1.22034	0.233333	0	0	0	0	0	0	0	0	0	0	0	0	0	0	0	0	0	0	0	#DIV/0!	#DIV/0!	0.141	0.338	0.386	Ssa12007051,transcription,Myb_DNA-binding
Ssa01000142	0.064	0	0	0.0213333	0	0	0.316	0.105333	0	0.068	0	0.0226667	0	0.088	0	0.0293333	0	0.178	0.072	0.0833333	4.9375	1.0625	2.84091	0.058	0.055	0	0.0376667	0	0	0	0	0.068	0.198	0	0.133	0	0	0.0443333	0.066	0.069	0	0.045	0	1.01504	4.386	6.196	2.914	Ssa01000806,SNARE domain,SNARE
Ssa06017723	0.011	0.012	0.184	0.069	0.028	0.028	0.965	0.340333	0.137	0.332	0.544	0.337667	0	0.074	0.086	0.0533333	0.204	0.01	0	0.0713333	4.93237	4.89372	1.3375	0.019	0.037	0.023	0.0263333	0.013	0	0	0.00433333	0.102	0.122	0.061	0.022	0.065	0.048	0.045	0.089	0.035	0.01	0.0446667	0.164557	0.992593	0	0	0	Ssa12007571,21 kDa protein-like,PMEI
Ssa07021470	0	0.093	0	0.031	0.071	0.142	0.244	0.152333	0.263	0.088	0.096	0.149	0.047	0	0.147	0.0646667	0.078	0.115	0	0.0643333	4.91398	4.80645	0.994845	0	0	0	0	0	0	0	0	0.044	0	0.093	0	0.041	0	0.0136667	0.128	0.4	0.306	0.278	#DIV/0!	20.3415	0	0	0	Ssa06018218,Calcium-dependent protein kinase,"EF-hand_1,EF-hand_5,EF-hand_6,Pkinase"
Ssa02011828	0.234	0.053	1.245	0.510667	0.163	0.565	6.8	2.50933	0.373	2.892	2.593	1.95267	0.266	0.259	0.501	0.342	0.578	0.174	0.264	0.338667	4.91384	3.82376	0.990253	0.296	0	0	0.0986667	0	0	0	0	0	0.29	0.053	0	0	0	0	0	0	0	0	0	#DIV/0!	4.015	4.451	3.615	Ssa11005111,Pentatricopeptide repeat-containing protein At5g67570,"PPR,PPR_2,PPR_3"
Ssa08023023	17.996	3.106	25.478	15.5267	34.981	57.121	136.638	76.2467	390.895	344.802	272.884	336.194	376.658	156.019	165.789	232.822	386.524	207.943	242.529	278.999	4.91069	21.6527	1.19833	0.302	0.214	0.262	0.259333	1.397	2.333	2.2	1.97667	15.27	13.755	23.562	3.812	8.935	12.068	8.27167	11.33	15.308	10.238	12.292	7.62211	1.48604	24.298	16.767	23.635	Ssa05015905,-,-
Ssa07019813	0.089	0.057	0.054	0.0666667	0.088	0.306	0.588	0.327333	0.424	0.378	0.425	0.409	0.13	0.289	0.079	0.166	0.12	0.071	0	0.0636667	4.91	6.135	0.383534	0.241	0.152	0.053	0.148667	0.44	0.451	0.334	0.408333	0.563	0.718	0.532	1.527	1.243	0.677	1.149	0.184	0.15	0.224	0.186	2.74664	0.16188	2.008	18.827	7.548	Ssa10003145,TPL-binding domain in jasmonate signalling,"Jas,PHD"
Ssa03013043	0.044	0.05	0.038	0.044	0.026	0.114	0.508	0.216	0.047	0.313	0.264	0.208	0.033	0.091	0.079	0.0676667	0.042	0	0	0.014	4.90909	4.72727	0.206897	0.027	0.05	0	0.0256667	0	0	0	0	0.078	0.061	0	0.061	0.059	0.131	0.0836667	0.046	0	0.041	0.029	0	0.346614	8.534	8.426	8.067	Ssa08023872,WRKY transcription factor,WRKY
Ssa07020606	0.132	0	0.057	0.063	0.058	0.343	0.524	0.308333	0	0.212	0.31	0.174	0.151	0.504	0.473	0.376	0.189	0	0	0.063	4.89418	2.7619	0.167553	0.06	0.284	0.695	0.346333	0.159	0.253	0.25	0.220667	0.421	0.478	0.226	0.482	0.332	0.443	0.419	0	0.286	0.123	0.136333	0.637151	0.325378	36.195	33.342	31.378	Ssa11004942,Gamma carbonic anhydrase 1,Hexapep
Ssa01002751	0.044	0.017	0.158	0.073	0.077	0.178	0.814	0.356333	0.141	0.227	0.27	0.212667	0.075	0.086	0.105	0.0886667	0.091	0.055	0.033	0.0596667	4.88128	2.91324	0.672932	0.08	0.069	0.031	0.06	0.053	0.047	0.018	0.0393333	0.132	0.136	0	0.069	0.088	0.458	0.205	0.13	0.183	0.068	0.127	0.655556	0.619512	5.287	5.8	3.492	Ssa07021750,transcription factor,-
Ssa02010853	0.07	0.053	0.362	0.161667	0.489	1.113	0.765	0.789	0.337	3.696	7.026	3.68633	0.027	0.113	0.105	0.0816667	0.668	0.196	0.158	0.340667	4.88041	22.8021	4.17143	0.212	0.101	0	0.104333	0.056	0.089	0.029	0.058	0.273	12.063	0.053	0.122	0.094	0.026	0.0806667	0.413	0.051	0.022	0.162	0.555911	2.00826	17.36	53.793	58.066	Ssa07020982,Serine threonine-protein kinase,"Pkinase,Pkinase_C"
Ssa01001556	0.016	0	0.014	0.01	0.056	0.042	0.048	0.0486667	0.077	0.121	0.151	0.116333	0.129	0.056	0.043	0.076	0.031	0	0.109	0.0466667	4.86667	11.6333	0.614035	0	0	0	0	0	0	0	0	0	0.4	0	0	0	0.18	0.06	0	0.14	0.03	0.0566667	#DIV/0!	0.944444	0.342	0.136	0.259	Ssa06018860,Zinc finger protein CONSTANS-like,"CCT,zf-B_box"
Ssa12007656	0.134	0	0.115	0.083	0.582	0.231	0.397	0.403333	0.427	0.285	0.314	0.342	0.457	0.093	0.239	0.263	1.399	0.249	0.151	0.599667	4.85944	4.12048	2.2801	0.121	0	0.14	0.087	0.16	0.17	0.673	0.334333	0.567	0.414	0.152	0	0.268	0.149	0.139	0.417	0.289	0.498	0.401333	3.84291	2.88729	3.619	0.931	2.553	Ssa13008657,VQ motif,VQ
Ssa02009714	1.242	0.186	2.619	1.349	3.619	4.966	11.017	6.534	3.266	2.18	2.324	2.59	1.933	1.806	2.56	2.09967	0.659	1.293	1.235	1.06233	4.84359	1.91994	0.505953	0.05	0	0	0.0166667	0	0.046	0	0.0153333	0	0	0.083	0.038	0.018	0	0.0186667	0.019	0	0	0.00633333	0.92	0.339286	117.724	43.179	42.515	Ssa03012788,ethylene-responsive transcription factor,AP2
Ssa02011872	0.127	0.048	0.764	0.313	0.258	0.475	3.813	1.51533	1.556	1.4	2.415	1.79033	1.205	1.904	1.097	1.402	9.86	1.697	4.869	5.47533	4.84132	5.71991	3.90537	0.575	0.691	0.089	0.451667	0	0	0	0	0.673	1.093	3.271	1.542	2.675	2.218	2.145	0.616	1.19	2.09	1.29867	0	0.605439	5.425	10.874	10.005	Ssa10004207,alpha-galactosidase,Melibiase_2
Ssa07021604	1.255	0.373	2.808	1.47867	7.664	8.44	5.357	7.15367	1.529	3.098	5.493	3.37333	1.127	0.799	0.531	0.819	24.313	10.213	7.629	14.0517	4.83792	2.28133	17.1571	0.15	0.51	0.347	0.335667	0.079	0.252	0.706	0.345667	1.015	5.997	0.825	1.339	1.125	0.184	0.882667	0.137	0.428	0.461	0.342	1.02979	0.387462	0.292	1.397	1.862	Ssa13008969,-,-
Ssa03012262	0	0	0.195	0.065	0.022	0	0.921	0.314333	0.08	0.778	0.747	0.535	0	0.226	0.09	0.105333	0.239	0	0	0.0796667	4.8359	8.23077	0.756329	0.114	0.022	0.053	0.063	0	0.128	0	0.0426667	0	0.13	0.143	0	0.05	0.112	0.054	0.052	0	0.023	0.025	0.677249	0.462963	16.063	49.626	33.122	Ssa03014057,E3 ubiquitin-protein ligase,zf-RING_2
Ssa06017967	0.097	0.073	0.084	0.0846667	0.676	0.392	0.16	0.409333	0.104	0.104	0.203	0.137	0.554	0.202	0.029	0.261667	0.893	0.876	0.694	0.821	4.83465	1.61811	3.13758	0.029	0.028	0	0.019	0	0.041	0	0.0136667	0	0	0	0.034	0	0.036	0.0233333	0.034	0.28	2.354	0.889333	0.719298	38.1143	29.092	11.097	16.27	Ssa08022311,Belongs to the class I-like SAM-binding methyltransferase superfamily. Erg6 SMT family,"CMAS,Methyltransf_11,Sterol_MT_C"
Ssa08022816	1.92	3.139	2.387	2.482	12.649	13.917	9.396	11.9873	4.599	8.187	6.747	6.511	2.76	4.996	7.265	5.007	5.04	3.201	2.335	3.52533	4.82971	2.62329	0.704081	2.608	1.3	2.121	2.00967	1.392	0.9	2.668	1.65333	13.489	10.948	5.05	3.362	2.887	7.037	4.42867	4.511	2.239	3.151	3.30033	0.82269	0.745221	10.927	10.395	25.849	Ssa04014570,-,-
Ssa09025246	47.845	32.728	32.093	37.5553	139.189	210.678	193.638	181.168	863.881	533.632	406.839	601.451	222.162	200.358	267.794	230.105	85.118	46.705	38.453	56.7587	4.82404	16.0151	0.246665	4.66	2.617	3.001	3.426	19.632	24.99	48.169	30.9303	92.693	78.48	65.165	25.965	11.654	82.619	40.0793	7.321	7.005	7.275	7.20033	9.02812	0.179652	16.967	10.815	9.907	Ssa03012911,protein trichome birefringence-like,"PC-Esterase,PMR5N"
Ssa12007831	4.12	1.569	7.017	4.23533	9.526	21.746	30.002	20.4247	8.107	11.683	15.776	11.8553	2.072	3.333	7.307	4.23733	3.958	3.066	1.197	2.74033	4.82245	2.79915	0.646712	1.892	0.981	0.245	1.03933	0.405	0.431	0.44	0.425333	0.309	2.469	1.272	0.437	0.281	0.325	0.347667	0.4	0.53	0.456	0.462	0.409237	1.32886	16.753	14.949	21.959	Ssa02012066,Fasciclin-like arabinogalactan protein,Fasciclin
Ssa04014748	2.883	0.888	1.126	1.63233	10.708	7.695	5.185	7.86267	0.628	8.941	7.266	5.61167	0.746	8.972	8.661	6.12633	0.498	1.343	0.591	0.810667	4.81683	3.43782	0.132325	0.593	0.899	1.238	0.91	0.628	0.5	0.165	0.431	2.638	3.516	0.298	1.363	1.839	0.438	1.21333	0.816	0.85	0.122	0.596	0.473626	0.491209	124.965	105.068	135.23	Ssa09025439,-,-
Ssa08023221	0.185	0.627	1.112	0.641333	1.447	2.876	4.941	3.088	0.591	4.339	6.213	3.71433	0.421	8.188	10.079	6.22933	0.176	0.689	0.209	0.358	4.81497	5.79158	0.05747	0.168	0.159	0	0.109	0	0	0	0	0.196	0.382	0.21	0.192	0	0	0.064	0	0	0.344	0.114667	0	1.79167	0.649	0.69	0.315	Ssa03012309,Belongs to the aldehyde dehydrogenase family,Aldedh
Ssa01000582	0.079	0.089	0.09	0.086	0.365	0.408	0.468	0.413667	0.294	0.308	0.287	0.296333	0.478	0.291	0.281	0.35	0.125	0.367	0.118	0.203333	4.81008	3.44574	0.580952	0.024	0.023	0	0.0156667	0	0	0	0	0	0	0	0	0	0	0	0	0	0	0	0	#DIV/0!	1.144	1.252	1.672	Ssa06019358,Beta-xylosidase alpha-L-arabinofuranosidase,"Fn3-like,Glyco_hydro_3,Glyco_hydro_3_C"
Ssa05017199	0.071	0	0	0.0236667	0	0.061	0.28	0.113667	0.226	3.466	0.221	1.30433	0.563	0.538	0.505	0.535333	0.134	0.132	0.08	0.115333	4.80282	55.1127	0.215442	0	0.182	0	0.0606667	0	0	0.089	0.0296667	0	0.292	0	0	0	0	0	0.073	0	0	0.0243333	0.489011	#DIV/0!	1.313	1.048	1.396	Ssa08023323,-,-
Ssa13009079	0.11	0.272	0.094	0.158667	0.629	0.53	1.127	0.762	0.245	0.888	0.513	0.548667	0.225	1.485	1.781	1.16367	0.208	0.163	0.124	0.165	4.80252	3.45798	0.141793	1.31	0.752	1.012	1.02467	0.682	0.223	0.331	0.412	2.229	1.561	0.149	1.778	3.01	1.661	2.14967	0.705	0.995	1.449	1.04967	0.402082	0.488293	28.656	49.407	54.74	Ssa12006570,transcription factor,Myb_DNA-binding
Ssa08022305	0	0	0.01	0.00333333	0	0	0.048	0.016	0.019	0	0	0.00633333	0	0.033	0	0.011	0.012	0.023	0	0.0116667	4.8	1.9	1.06061	0.022	0	0.025	0.0156667	0.015	0	0	0.005	0	0.037	0	0	0	0	0	0	0.013	0	0.00433333	0.319149	#DIV/0!	5.192	36.263	37.626	Ssa03013923,Belongs to the peroxidase family. Classical plant (class III) peroxidase subfamily,peroxidase
Ssa04015031	0	0.133	0.303	0.145333	0.102	0.711	1.279	0.697333	0.188	0.376	0.459	0.341	0	0.244	0.21	0.151333	0	0	0	0	4.79817	2.34633	0	0.852	0.706	1.111	0.889667	0.704	0.299	0.296	0.433	0.623	0.971	0	0.734	1.414	0.393	0.847	0.61	0.508	0.657	0.591667	0.486699	0.698544	7.705	6.879	9.23	Ssa08022909,membrane protein At1g06890-like,TPT
Ssa08023305	0.147	0.062	0.3	0.169667	0.064	0.27	2.107	0.813667	0.381	1.038	0.674	0.697667	0.084	0.216	0.279	0.193	0.401	0.086	0.207	0.231333	4.79568	4.11198	1.19862	0	0	0	0	0	0	0	0	0.019	0.038	0	0	0	0	0	0	0	0	0	#DIV/0!	#DIV/0!	9.615	3.599	3.838	Ssa12007681,WAT1-related protein,EamA
Ssa07020607	0.183	0.138	0.341	0.220667	0.319	1.16	1.691	1.05667	1.463	0.977	1.168	1.20267	0.66	0.633	0.709	0.667333	0.348	0.199	0.379	0.308667	4.78852	5.45015	0.462537	0.332	0.838	1.41	0.86	3.474	2.138	1.651	2.421	4.141	3.876	2.324	4.413	2.693	1.667	2.92433	0.792	0.792	0.853	0.812333	2.81512	0.277784	1.069	1.326	2.623	Ssa13008087,ankyrin repeat-containing protein,"Ank_2,PGG"
Ssa07021762	0.11	0.075	0.757	0.314	0.249	0.4	3.857	1.502	0.669	0.235	0.637	0.513667	0.1	0.442	0.846	0.462667	0.293	0.062	0.149	0.168	4.78344	1.63588	0.363112	0.259	0.132	0.046	0.145667	0.026	0.028	0.111	0.055	0.117	0.227	0.2	0.16	0.155	0.147	0.154	0.046	0.119	0.185	0.116667	0.377574	0.757576	0.188	0	0	Ssa13009345,-,-
Ssa01001149	0	0	0.06	0.02	0.122	0.061	0.104	0.0956667	0	0.149	0.027	0.0586667	0	0.024	0	0.008	0	0	0	0	4.78333	2.93333	0	0	0.06	0	0.02	0	0	0	0	0	0	0	0	0	0	0	0	0	0	0	0	#DIV/0!	10.492	24.538	21.393	Ssa06018488,Protein kinase domain,Pkinase
Ssa07020533	0.665	0.25	1.143	0.686	1.542	1.388	6.907	3.279	1.239	2.777	4.718	2.91133	1.135	2.223	1.584	1.64733	1.527	1.033	0.375	0.978333	4.77988	4.24393	0.593889	0.151	0.095	0.349	0.198333	0.199	0.353	0.279	0.277	0.587	1.087	0.504	0.749	1	0.556	0.768333	0.288	0.18	0.361	0.276333	1.39664	0.359653	1.813	2.511	3.499	Ssa01001825,Core-2/I-Branching enzyme,Branch
Ssa04015504	0.025	0	0.106	0.0436667	0	0.064	0.562	0.208667	0.434	0.105	0.193	0.244	0.028	0.12	0.022	0.0566667	0.07	0	0.111	0.0603333	4.77863	5.58779	1.06471	0	0	0	0	0	0	0	0	0	0	0	0	0	0	0	0	0	0	0	#DIV/0!	#DIV/0!	39.985	24.917	29.962	Ssa10003835,tRNA (adenine-N6-)-methyltransferase activity,Chloroa_b-bind
Ssa09025135	0.132	0.15	0.91	0.397333	0	1.372	4.323	1.89833	3.807	4.659	6.205	4.89033	0	0.092	0.946	0.346	1.132	0.37	2.239	1.247	4.77768	12.3079	3.60405	0.12	0	0	0.04	0.159	0.169	0	0.109333	0.842	1.23	0.15	0	0.265	0	0.0883333	0	0	0.247	0.0823333	2.73333	0.932075	14.768	15.369	12.845	Ssa06017478,Pseudouridine synthase,TruD
Ssa02010985	0	0.711	1.081	0.597333	2.734	2.716	3.111	2.85367	0	4.024	2.456	2.16	1.432	2.61	3.371	2.471	1.195	0	0.709	0.634667	4.77734	3.61607	0.256846	0.57	0	0	0.19	0	0.801	2.373	1.058	1.333	2.596	0	5.233	1.891	3.504	3.54267	0.653	2.04	3.513	2.06867	5.56842	0.583929	97.924	80.643	56.201	Ssa01002209,K-box region,"K-box,SRF-TF"
Ssa06019468	33.707	15.82	26.303	25.2767	89.914	128.973	143.225	120.704	135.23	88.633	78.136	100.666	134.95	56.056	78.123	89.7097	36.817	41.354	23.942	34.0377	4.77531	3.98258	0.37942	2.257	1.12	0.374	1.25033	0.497	0.906	1.716	1.03967	5.784	44.885	4.583	1.543	1.011	1.455	1.33633	4.189	3.015	3.812	3.672	0.831512	2.74782	0.262	0.648	0.597	Ssa06017998,Belongs to the MCM family,"MCM,MCM_OB"
Ssa02012123	0.486	0.11	3.88	1.492	6.165	8.095	7.111	7.12367	16.755	2.227	5.007	7.99633	4.368	2.586	1.128	2.694	1.754	2.489	0.712	1.65167	4.77458	5.35947	0.613091	1.056	1.042	1.682	1.26	2.56	2.535	3.847	2.98067	1.081	0.702	4.634	0.758	3.651	0.974	1.79433	0.151	0.105	0.362	0.206	2.36561	0.114806	25.109	37.403	35.103	Ssa09024275,Protein RETICULATA-related,RETICULATA-like
Ssa01001627	15.097	26.076	14.203	18.4587	99.329	96.423	68.462	88.0713	174.753	128.882	125.79	143.142	93.688	40.875	35.528	56.697	117.44	68.612	44.379	76.8103	4.77127	7.75471	1.35475	2.17	1.645	1.132	1.649	7.988	9.455	13.507	10.3167	100.577	95.446	30.074	23.048	17.574	18.201	19.6077	22.264	10.446	5.317	12.6757	6.25632	0.646465	7.259	7.142	7.908	Ssa10004526,chloroplast organization,-
Ssa02009879	0.05	0.095	0.101	0.082	0.322	0.334	0.516	0.390667	0.242	0.108	0.302	0.217333	0.038	0.14	0.225	0.134333	0.096	0.063	0.114	0.091	4.76423	2.65041	0.677419	0.213	0.115	0.053	0.127	0.161	0.214	0.063	0.146	0.053	0.035	0.076	0.052	0.051	0.094	0.0656667	0.506	0.582	0.689	0.592333	1.14961	9.0203	7.28	15.149	10.629	Ssa07021103,Serine threonine-protein kinase,"Pkinase,Pkinase_C"
Ssa07020885	0.167	0.323	0.184	0.224667	0.207	0.741	2.263	1.07033	0.152	0.483	0.54	0.391667	0.136	0.412	0.404	0.317333	0.023	0.022	0.027	0.024	4.76409	1.74332	0.0756303	0	0.02	0.025	0.015	0	0	0.06	0.02	1.868	1.377	0.379	0	0.215	0	0.0716667	0	0	0.022	0.00733333	1.33333	0.102326	9.901	15.611	13.228	Ssa10003595,Ubiquitin-like-specific protease,Peptidase_C48
Ssa01002200	5.053	0	5.758	3.60367	16.315	11.219	23.868	17.134	4.446	5.607	0	3.351	0	13.62	0.092	4.57067	0	2.882	5.113	2.665	4.7546	0.929886	0.583066	16.995	12.652	24.891	18.1793	19.019	14.701	29.948	21.2227	24.035	15.855	0	0	0	0	0	0	0	0	0	1.16741	#DIV/0!	0	0	0	Ssa01001098,-,-
Ssa10003845	0	10.306	6.27	5.52533	3.673	0.58	74.475	26.2427	30.365	0.614	2.625	11.2013	0.656	74.778	1.63	25.688	18.522	0	4.221	7.581	4.74952	2.02727	0.295118	0	0	0.101	0.0336667	0	0	0	0	1.017	0.198	0.654	0	0	0	0	1.595	1.661	2.056	1.77067	0	#DIV/0!	5.63	4.903	5.672	Ssa05017282,Bifunctional enzyme. Involved in de novo dTMP biosynthesis. Key enzyme in folate metabolism,"DHFR_1,Thymidylat_synt"
Ssa08022051	0.464	0.495	1.107	0.688667	1.3	4.385	4.118	3.26767	6.752	1.883	2.798	3.811	2.23	2.594	2.498	2.44067	1.482	0.781	0.436	0.899667	4.74492	5.53388	0.368615	3.875	3.108	4.545	3.84267	0.988	0.673	2.301	1.32067	1.311	1.703	1.376	2.439	1.99	1.767	2.06533	1.632	1.31	1.86	1.60067	0.343685	0.775016	5.754	27.126	18.699	Ssa09025421,Boron transporter,HCO3_cotransp
Ssa02009671	8.334	12.687	6.443	9.15467	44.745	48.524	37.018	43.429	76.939	118.719	87.308	94.322	41.105	36.94	35.835	37.96	13.461	15.27	15.609	14.78	4.74392	10.3032	0.389357	2.013	2.656	1.708	2.12567	71.531	62.639	45.255	59.8083	82.073	33.949	34.888	14.361	11.377	54.832	26.8567	22.576	16.386	12.45	17.1373	28.1363	0.638104	2.522	4.158	2.298	Ssa10003947,-,-
Ssa11006230	0	0	0.345	0.115	0	0.107	1.529	0.545333	0.148	0.89	1.4	0.812667	0.035	0.086	0.11	0.077	0.235	0	0	0.0783333	4.74203	7.06667	1.01732	0.084	0.106	0.032	0.074	0	0.039	0.039	0.026	0.688	1.499	1.475	1.286	1.27	0.448	1.00133	0.064	0.1	0.23	0.131333	0.351351	0.131158	9.308	8.657	7.7	Ssa04014680,-,-
Ssa11005346	3.445	2.241	47.666	17.784	27.046	208.878	16.988	84.304	944.659	390.782	348.029	561.157	15.864	16.605	80.331	37.6	115.262	32.487	8.413	52.054	4.74044	31.554	1.38441	1.418	3.359	14.244	6.34033	3.376	4.784	4.266	4.142	349.968	1130.75	111.048	536.558	44.056	108.884	229.833	378.46	1183.99	40.917	534.456	0.653278	2.32542	76.225	106.934	86.469	Ssa02011393,YTH domain-containing family protein,YTH
Ssa06017645	0.572	0	11.2	3.924	2.635	13.727	39.312	18.558	41.276	6.706	11.879	19.9537	2.473	4.192	5.976	4.21367	4.183	1.172	1.418	2.25767	4.72936	5.08503	0.535796	0.57	0.491	0.48	0.513667	2.739	3.712	4.457	3.636	1.333	0.944	3.767	5.352	1.777	4.588	3.90567	1.247	1.545	2.555	1.78233	7.07852	0.456345	30.713	50.587	47.418	Ssa06018032,-,-
Ssa06017544	0	0	0.077	0.0256667	0.058	0.019	0.287	0.121333	0.036	0.309	0.087	0.144	0.051	0.015	0.02	0.0286667	0.064	0.042	0.05	0.052	4.72727	5.61039	1.81395	0	0.057	0	0.019	0.401	0.284	0.365	0.35	0.284	0.253	0.076	0.232	0.246	0.373	0.283667	0.139	0.072	0.125	0.112	18.4211	0.39483	0.239	0.572	0.218	Ssa13008498,-,-
Ssa05016679	0	0	0.335	0.111667	0.038	0	1.545	0.527667	0.416	0	0	0.138667	0	0.06	0.232	0.0973333	0.206	0.04	0.049	0.0983333	4.72537	1.24179	1.01027	0	0	0.046	0.0153333	0	0	0	0	0	0	0	0.09	0.043	6.96	2.36433	0.045	0	0	0.015	0	0.00634428	0.033	0.052	0.06	Ssa01000222,Alkaline neutral invertase,Glyco_hydro_100
Ssa13008539	0.646	0.044	0.824	0.504667	2.041	3.21	1.897	2.38267	1.187	0.959	1.07	1.072	1.113	2.016	3.967	2.36533	0.892	0.456	0.198	0.515333	4.72127	2.12417	0.217869	0.018	0	0	0.006	0	0	0	0	0	0	0	0	0	0	0	0	0	0	0	0	#DIV/0!	23.328	26.304	27.438	Ssa06018097,SRSF protein kinase,Pkinase
Ssa09024131	0	0	0.349	0.116333	0	0.088	1.556	0.548	0.972	0.27	0.317	0.519667	0	0.281	0.317	0.199333	0	0.047	0	0.0156667	4.7106	4.46705	0.0785953	0	0	0	0	0	0	0	0	0	0	0	0.053	0.051	0	0.0346667	0	0	0	0	#DIV/0!	0	14.026	19.067	9.306	Ssa13008978,Acyl-coenzyme A thioesterase 9,4HBT
Ssa05016188	0.792	0.596	0	0.462667	3.136	1.747	1.653	2.17867	0	0.094	0.344	0.146	0	1.521	1.021	0.847333	0.502	0.492	0.198	0.397333	4.70893	0.315562	0.468922	0.159	0.377	0.554	0.363333	8.429	4.255	3.761	5.48167	0.28	0.545	0	0.091	0.265	0.49	0.282	0.639	0.666	0.082	0.462333	15.0872	1.63948	126.085	19.459	24.458	Ssa10004347,Histone H3,Histone
Ssa01002019	0.117	0.053	0.101	0.0903333	0.265	0.405	0.604	0.424667	0.075	0.3	0.385	0.253333	0.027	0.292	0.377	0.232	0.045	0.022	0	0.0223333	4.70111	2.80443	0.0962644	0.021	0.06	0.049	0.0433333	0.028	0.03	0.03	0.0293333	0.05	0.073	0.107	0.122	0.165	0.34	0.209	0	0.051	0.022	0.0243333	0.676923	0.116427	14.588	13.303	24.29	Ssa08023687,WRKY transcription factor,WRKY
Ssa11005746	0.016	0	0.014	0.01	0	0	0.141	0.047	0.025	0.169	0.21	0.134667	0	0.033	0.057	0.03	0.09	0	0.018	0.036	4.7	13.4667	1.2	0	0	0	0	0	0	0	0	0.017	0.033	0	0.016	0	0.018	0.0113333	0.016	0	0	0.00533333	#DIV/0!	0.470588	6.926	9.681	9.581	Ssa05016716,Belongs to the 'GDSL' lipolytic enzyme family,Lipase_GDSL
Ssa11005274	0.338	0.477	8.268	3.02767	0.587	2.041	40.005	14.211	2.832	15.572	8.44	8.948	0.481	2.277	2.941	1.89967	9.867	2.36	3.426	5.21767	4.69371	2.95541	2.74662	0.612	2.318	0	0.976667	0.101	0.107	0.106	0.104667	0.179	0.697	0	0	0	0.094	0.0313333	0	0	0	0	0.107167	0	53.507	29.729	38.053	Ssa04015117,Transcription initiation factor TFIID subunit,TAFII55_N
Ssa03013789	0.093	0.079	0.281	0.151	0.101	0.363	1.662	0.708667	1.044	0.746	1.531	1.107	0.452	0.613	0.563	0.542667	0.732	0.326	0.21	0.422667	4.69316	7.33113	0.77887	0	0.08	0.098	0.0593333	0	0.03	0.029	0.0196667	0.47	4.046	0.053	0.801	0.187	0.832	0.606667	0.194	0.429	0.239	0.287333	0.331461	0.473626	0	0.225	0.103	Ssa01001487,ankyrin repeat-containing protein,"Ank_2,Ank_4,PGG"
Ssa01001465	0.421	0.285	0.289	0.331667	1.372	1.798	1.498	1.556	0.235	0.65	0.591	0.492	0.048	0.145	0.188	0.127	0.879	0.274	0.047	0.4	4.69146	1.48342	3.14961	0.114	0.162	0.132	0.136	0.252	0.241	0.212	0.235	0.446	0.391	0.143	0.109	0.084	0.234	0.142333	0.197	0.136	0.157	0.163333	1.72794	1.14754	0.923	2.208	0.701	Ssa07020354,pre-rRNA-processing protein TSR2 homolog,WGG
Ssa01000034	0	0	0.029	0.00966667	0	0	0.136	0.0453333	0	0	0	0	0	0	0	0	0	0	0	0	4.68966	0	#DIV/0!	0	0	0	0	0	0	0	0	0	0	0	0	0	0	0	0	0	0	0	#DIV/0!	#DIV/0!	1.438	3.033	2.09	Ssa07019902,membrane protein At3g27390,-
Ssa03013199	0.453	0.186	1.982	0.873667	1.039	7.258	3.994	4.097	16.581	25.389	20.915	20.9617	2.579	2.137	3.79	2.83533	0.626	0.691	0.279	0.532	4.68943	23.9928	0.187632	0.709	0.566	0.692	0.655667	0	0.262	0.155	0.139	44.612	115.984	2.808	12.167	1.982	1.377	5.17533	30.582	34.513	1.611	22.2353	0.211998	4.29641	0.124	0.05	0	Ssa11005494,Fasciclin-like arabinogalactan protein,Fasciclin
Ssa06018288	3.541	2.515	8.46	4.83867	11.787	19.047	37.232	22.6887	5.171	7.155	8.376	6.90067	3.57	5.598	5.814	4.994	3.301	3.237	1.977	2.83833	4.68903	1.42615	0.568349	8.888	8.594	8.071	8.51767	7.957	6.869	9.838	8.22133	10.22	11.102	12.565	13.152	8.654	4.171	8.659	8.158	7.546	10.11	8.60467	0.96521	0.993725	89.409	85.02	83.272	Ssa11005043,f-box protein,"F-box-like,LRR_6"
Ssa02010604	0.051	0	0.066	0.039	0.134	0.133	0.28	0.182333	0.493	0.027	0.261	0.260333	0.146	0.231	0.735	0.370667	0	0.12	0	0.04	4.67521	6.67521	0.107914	0	0	0	0	0	0	0	0	0	0	0	0	0	0	0	0	0	0	0	#DIV/0!	#DIV/0!	2.671	5.884	5.852	Ssa11005974,Alpha-glucan water dikinase,PPDK_N
Ssa13009167	0.188	0.297	0.258	0.247667	0.457	0.486	2.526	1.15633	0.3	1.121	1.349	0.923333	0.299	0.519	0.604	0.474	0.464	0.595	0.593	0.550667	4.66891	3.72813	1.16174	1.19	0.258	0.276	0.574667	0.315	0	0.425	0.246667	1.114	3.371	0.384	2.226	1.468	1.13	1.608	0.78	1.299	2.202	1.427	0.429234	0.887438	72.367	34.372	51.458	Ssa05015867,"DNA-directed RNA polymerases II, IV and V subunit 3-like","RNA_pol_A_bac,RNA_pol_L"
Ssa11005761	2.627	0.628	12.065	5.10667	11.946	20.286	39.281	23.8377	11.699	6.787	19.61	12.6987	3.91	1.677	3.339	2.97533	50.595	48.388	40.655	46.546	4.66795	2.48668	15.644	3.797	1.387	1.114	2.09933	0.484	1.608	1.27	1.12067	0.428	0.782	2.754	0.21	0.658	0.113	0.327	0.367	0.546	0.988	0.633667	0.53382	1.93782	4.908	4.888	4.021	Ssa02011182,Belongs to the class I-like SAM-binding methyltransferase superfamily. Protein arginine N- methyltransferase family,"Methyltransf_11,Methyltransf_25,zf-C2H2_2"
Ssa02011984	1.012	0.572	4.456	2.01333	6.427	9.505	12.23	9.38733	2.367	2.37	2.64	2.459	1.893	3.2	4.407	3.16667	1.322	1.314	0.896	1.17733	4.66258	1.22136	0.371789	1.064	0.698	0.398	0.72	0.022	0.092	0.159	0.091	0.421	0.392	0.205	0.489	0.217	0.363	0.356333	0.45	0.508	0.522	0.493333	0.126389	1.38447	0.065	0.103	0.177	Ssa06018753,Myb-related protein,Myb_DNA-binding
Ssa02010050	5.557	3.782	4.581	4.64	10.036	25.183	29.617	21.612	1.791	24.69	19.582	15.3543	1.237	2.303	5.379	2.973	1.312	1.945	0.642	1.29967	4.65776	3.30912	0.437157	4.704	2.813	2.228	3.24833	1.633	1.142	1.128	1.301	15.614	29.56	2.097	3.499	1.678	1.019	2.06533	2.024	1.045	0.594	1.221	0.400513	0.591188	4.8	12.385	9.416	Ssa05016117,-,-
Ssa12007084	0.164	0.573	0.177	0.304667	0.441	1.172	2.643	1.41867	1.226	1.709	1.252	1.39567	0.25	1.639	2.705	1.53133	0.195	0.46	0.463	0.372667	4.65646	4.58096	0.243361	0.261	0.576	0.676	0.504333	25.374	15.525	13.577	18.1587	8.174	4.101	1.525	1.14	1.071	3.222	1.811	0.711	0.533	0.485	0.576333	36.0053	0.31824	6.984	19.155	12.272	Ssa04015716,Cmp-sialic acid transporter,Nuc_sug_transp
Ssa01001918	0.367	0.153	0.994	0.504667	0.335	1.266	5.44	2.347	1.263	1.275	1.627	1.38833	0.703	1.468	1.344	1.17167	0.477	0.557	0.544	0.526	4.65059	2.75099	0.448933	0.175	0.05	0.02	0.0816667	0.023	0.025	0.049	0.0323333	0.123	0.159	0.044	0.281	0.058	0.301	0.213333	0.04	0.146	0.072	0.086	0.395918	0.403125	0.347	0.416	0.158	Ssa11005619,Belongs to the cytochrome P450 family,p450
Ssa13009102	0.168	0.032	0.456	0.218667	0.218	0.277	2.555	1.01667	1.182	0.595	0.861	0.879333	0.048	0.251	0.536	0.278333	0.371	0.13	0.126	0.209	4.64939	4.02134	0.750898	0	0	0	0	0.017	0.018	0.018	0.0176667	0.015	0.115	0.032	0.174	0.112	0.031	0.105667	0.145	0.121	0.286	0.184	#DIV/0!	1.74132	0.323	0.414	0.665	Ssa06019436,separase,Peptidase_C50
Ssa13009217	0.137	0	0.235	0.124	0.713	0.472	0.541	0.575333	1.965	1.312	0.534	1.27033	0.311	0.095	0.611	0.339	0.39	0.382	0.462	0.411333	4.63978	10.2446	1.21337	0.124	0	0	0.0413333	0.164	0	0	0.0546667	1.014	27.092	0.466	2.702	0.137	3.961	2.26667	0.852	1.774	1.018	1.21467	1.32258	0.535882	400.82	340.735	301.728	Ssa09025690,Heavy metal-associated isoprenylated plant protein,HMA
Ssa12006845	2.328	0.847	2.932	2.03567	3.892	9.355	15.068	9.43833	6.631	9.784	9.493	8.636	6.064	8.142	14.575	9.59367	3.265	4.025	2.107	3.13233	4.63648	4.24234	0.3265	0.75	0.211	0.082	0.347667	0.054	0.071	0.169	0.098	0.628	1.536	0.407	1.373	0.673	0.811	0.952333	0.337	0.448	0.458	0.414333	0.281879	0.435072	4.273	15.031	12.387	Ssa10003849,GPI mannosyltransferase,Glyco_transf_22
Ssa10003378	1.646	0.93	6.211	2.929	7.103	29.848	3.722	13.5577	368.196	61.106	29.291	152.864	1.94	1.707	2.835	2.16067	2.625	2.246	1.524	2.13167	4.62877	52.1899	0.986578	1.544	7.263	52.011	20.2727	16.897	15.041	8.648	13.5287	1458.84	1490.34	382.989	1886.61	111.19	365.309	787.702	712.485	1919.21	235.377	955.69	0.667335	1.21326	0.038	0.031	0.07	Ssa05016229,choline kinase,"Choline_kin_N,Choline_kinase"
Ssa13008394	0.565	0.479	0	0.348	2.335	1.587	0.909	1.61033	0	0.075	0.773	0.282667	0.885	0.978	1.641	1.168	0.067	1.054	0.319	0.48	4.62739	0.812261	0.410959	0	0	0	0	0	0	0	0	0	0	0	0	0	0	0	0	0	0	0	#DIV/0!	#DIV/0!	24.76	14.011	13.341	Ssa09024844,Protein of unknown function (DUF620),DUF620
Ssa02010130	0	0	0.021	0.007	0.011	0	0.086	0.0323333	0	0.04	0.019	0.0196667	0	0.009	0	0.003	0.035	0.035	0.056	0.042	4.61905	2.80952	14	0.09	0.043	0.026	0.053	0	0	0	0	0.053	0.09	0	0	0.012	0.042	0.018	0.142	0.094	0.058	0.098	0	5.44444	1.018	1.45	2.478	Ssa06018080,-,NT-C2
Ssa12007028	1.18	0.818	2.857	1.61833	4.43	7.69	10.295	7.47167	7.197	8.979	9.343	8.50633	4.61	5.064	7.091	5.58833	8.206	5.473	4.776	6.15167	4.61689	5.25623	1.10081	0.267	0.299	0.084	0.216667	0.289	0.205	0.304	0.266	0.597	1.495	1.005	1.311	1.344	0.897	1.184	1.142	1.044	1.898	1.36133	1.22769	1.14977	7.531	18.334	14.998	Ssa10003121,Arm repeat protein interacting with,"Arm,BTB"
Ssa04014908	0.034	0	0.202	0.0786667	0.058	0	1.031	0.363	1.074	0.072	0.079	0.408333	0	0.023	0.12	0.0476667	0.096	0.063	0.038	0.0656667	4.61441	5.19068	1.37762	0	0	0	0	0	0	0	0	0	0	0.038	0.035	0	0.075	0.0366667	0	0	0	0	#DIV/0!	0	98.066	66.897	56.861	Ssa04014632,NADH dehydrogenase ubiquinone 1 alpha subcomplex subunit,L51_S25_CI-B8
Ssa02011162	0.112	0.084	0	0.0653333	0.065	0.064	0.775	0.301333	2.206	0	0.058	0.754667	0	0.103	0.033	0.0453333	0.142	0.07	0.126	0.112667	4.61224	11.551	2.48529	0.034	0.032	0	0.022	0	0	0	0	0	0.039	0	0	0	0.083	0.0276667	0	0	0	0	0	0	15.482	10.964	8.659	Ssa05017230,E3 ubiquitin-protein ligase,IBR
Ssa01002683	0.961	1.059	0.568	0.862667	3.426	4.264	4.231	3.97367	1.382	4.407	3.622	3.137	1.162	2.9	4.722	2.928	1.484	1.03	0.704	1.07267	4.60626	3.6364	0.366348	0.783	0.701	0.34	0.608	0.791	0.52	0.665	0.658667	1.769	2.604	0.792	2.062	1.566	1.245	1.62433	0.561	0.468	0.66	0.563	1.08333	0.346604	8.275	2.968	6.524	Ssa13009339,Belongs to the GST superfamily,"GST_C,GST_N,GST_N_3"
Ssa07020048	0.339	0.239	0.691	0.423	0.442	0.037	5.363	1.94733	0.068	20.005	20.808	13.627	0.771	0.117	0	0.296	0.765	0.513	0.812	0.696667	4.60362	32.2151	2.3536	0	0.109	0.489	0.199333	0.254	0.485	0.107	0.282	0.18	2.754	0.289	0	0.042	0.094	0.0453333	0.572	0.092	0.197	0.287	1.41472	6.33088	1.1	1.17	1.336	Ssa12007427,-,-
Ssa07020317	0	0	0.049	0.0163333	0	0	0.225	0.075	0	0.425	0.178	0.201	0	0.236	0	0.0786667	0	0	0	0	4.59184	12.3061	0	0	0	0	0	0	0	0	0	0	0.117	0	0	0	0	0	0	0	0.053	0.0176667	#DIV/0!	#DIV/0!	52.223	42.316	42.967	Ssa01001131,uridine nucleosidase 1-like,IU_nuc_hydro
Ssa02010540	0	0	0.225	0.075	0.057	0.264	0.712	0.344333	0.453	0.232	0.409	0.364667	0.025	0.03	0.214	0.0896667	0.145	0	0.074	0.073	4.59111	4.86222	0.814126	0.138	0.206	0	0.114667	0	0.028	0.055	0.0276667	0	0.067	0.05	0	0	0	0	0	0	0	0	0.241279	#DIV/0!	48.918	35.897	9.73	Ssa03013298,Belongs to the peptidase M10A family,"PG_binding_1,Peptidase_M10"
Ssa09024554	0.993	1	3.295	1.76267	4.897	8.987	10.375	8.08633	6.511	16.615	20.592	14.5727	2.839	3.766	5.223	3.94267	7.799	4.248	3.718	5.255	4.58756	8.2674	1.33285	2.308	0.483	0.113	0.968	0.096	0.171	0.337	0.201333	0.625	6.145	0.609	1.311	0.753	0.658	0.907333	0.975	0.551	0.549	0.691667	0.207989	0.762307	11.446	11.891	13.036	Ssa06017550,Belongs to the peptidase M24B family,"Creatinase_N,Creatinase_N_2,Peptidase_M24,Peptidase_M24_C"
Ssa10003900	0.217	0.153	0.303	0.224333	1.65	0.843	0.59	1.02767	0.13	0.289	0.339	0.252667	0.123	0.056	0.048	0.0756667	0.309	0.303	0.153	0.255	4.58098	1.1263	3.37004	6.015	7.397	0.797	4.73633	2.793	4.003	2.557	3.11767	11.174	16.311	27.038	12.208	23.1	5.257	13.5217	3.884	6.447	3.13	4.487	0.658245	0.331838	0.731	5.349	3.998	Ssa11006081,lysine-specific demethylase,"JmjC,JmjN,zf-C5HC2"
Ssa02012133	0.354	0.4	0.076	0.276667	1.001	1.224	1.577	1.26733	0	0.661	0.346	0.335667	0.101	0.613	0.396	0.37	0	0.083	0	0.0276667	4.58072	1.21325	0.0747748	3.931	3.725	3.068	3.57467	10.398	5.413	3.787	6.53267	8.917	6.399	2.817	7.37	8.436	2.764	6.19	1.104	0.575	2.392	1.357	1.82749	0.219225	1187.23	850.499	698.056	Ssa09024208,Cysteine proteinase inhibitor,"Cystatin,SQAPI"
Ssa09024760	0	0	0.071	0.0236667	0	0	0.325	0.108333	0	0	0	0	0	0.057	0	0.019	0	0	0	0	4.57746	0	0	0	0	0	0	0	0	0	0	0	0	0	0	0	0	0	0	0	0	0	#DIV/0!	#DIV/0!	5.146	5.71	4.86	Ssa11005292,"Chloroplast-localized elongation factor EF-G involved in protein synthesis in plastids. Catalyzes the GTP-dependent ribosomal translocation step during translation elongation. During this step, the ribosome changes from the pre-translocational (PRE) to the post-translocational (POST) state as the newly formed A- site-bound peptidyl-tRNA and P-site-bound deacylated tRNA move to the P …
Ssa09025362	0.899	0.312	2.553	1.25467	4.507	8.535	4.171	5.73767	6.623	10.096	12.632	9.78367	1.416	1.004	1.667	1.36233	12.15	3.928	2.415	6.16433	4.57306	7.79782	4.52483	2.066	2.609	2.974	2.54967	1.573	2.64	3.998	2.737	1.758	3.424	8.636	2.731	3.395	0.616	2.24733	3.157	1.868	2.703	2.576	1.07347	1.14625	0	0	0	Ssa08023690,Ras-related protein,Ras
Ssa02010602	0	0	0.035	0.0116667	0	0	0.16	0.0533333	0.258	0.302	0.032	0.197333	0.046	0.028	0.072	0.0486667	0.038	0	0.046	0.028	4.57143	16.9143	0.575342	0	0	0	0	0	0	0	0	0	0	0	0	0	0	0	0	0	0	0	#DIV/0!	#DIV/0!	0.174	0.416	0.264	Ssa13009269,Belongs to the iron ascorbate-dependent oxidoreductase family,"2OG-FeII_Oxy,DIOX_N"
Ssa01001209	0.348	0.197	0.71	0.418333	0.53	3.007	2.196	1.911	2.503	0.928	1.054	1.495	0.347	0.331	0.933	0.537	0.455	0.284	0.343	0.360667	4.56813	3.57371	0.671633	0.315	0.672	1.096	0.694333	0.678	0.554	0.547	0.593	0.83	0.359	0.148	0.407	0.044	0.146	0.199	0.271	0.235	0.162	0.222667	0.854057	1.11893	144.326	64.389	87.758	Ssa05017360,Belongs to the actin-binding proteins ADF family,Cofilin_ADF
Ssa07021172	3.774	2.558	4.539	3.62367	21.162	18.902	9.582	16.5487	17.378	6.035	7.565	10.326	11.169	6.003	10.506	9.226	17.75	18.225	15.879	17.2847	4.56683	2.8496	1.87347	0.114	0.162	0	0.092	0	0.08	0	0.0266667	0.133	0.519	0	0	0.063	0.07	0.0443333	0	0	0	0	0.289855	0	0	0.07	0.027	Ssa01001490,ankyrin repeat-containing protein,"Ank,Ank_2,PGG"
Ssa02011395	0	0.102	0.078	0.06	0.026	0.052	0.744	0.274	0.096	0.128	0.118	0.114	0	0.146	0.054	0.0666667	0	0	0	0	4.56667	1.9	0	0.572	0.491	0.726	0.596333	1.009	0.575	0.908	0.830667	1.531	1.708	1.162	1.314	0.634	1.308	1.08533	0.406	0.423	0.616	0.481667	1.39296	0.443796	1.225	0.733	0.949	Ssa02010419,-,-
Ssa08022217	0	0.102	0.078	0.06	0.026	0.052	0.744	0.274	0.096	0.128	0.118	0.114	0	0.146	0.054	0.0666667	0	0	0	0	4.56667	1.9	0	0.572	0.465	0.695	0.577333	1.009	0.575	0.908	0.830667	1.403	1.77	1.128	1.596	0.664	1.341	1.20033	0.437	0.39	0.588	0.471667	1.4388	0.392946	7.402	14.733	10.5	Ssa01001970,Cyclic nucleotide-gated ion channel 20,Ion_trans
Ssa07021207	0.153	0.052	0.316	0.173667	0.133	0.648	1.592	0.791	0.489	0.997	0.969	0.818333	0.122	0.519	0.493	0.378	0.16	0.071	0.328	0.186333	4.5547	4.71209	0.492945	0.056	0.118	0.096	0.09	0.147	0.176	0.173	0.165333	0.114	0.158	0.174	0.096	0.123	0.068	0.0956667	0.127	0.116	0.157	0.133333	1.83704	1.39373	1.071	2.078	1.798	Ssa02011620,ATPase family associated with various cellular activities (AAA),"AAA,zf-HC5HC2H"
Ssa05017053	18.395	24.242	28.788	23.8083	40.528	209.32	74.978	108.275	41.869	348.935	332.065	240.956	11.431	35.603	79.88	42.3047	13.158	10.342	7.149	10.2163	4.54779	10.1207	0.241494	12.445	13.606	17.087	14.3793	19.245	15.206	18.076	17.509	372.972	960.639	71.083	538.32	46.624	59.722	214.889	389.925	856.866	47.83	431.54	1.21765	2.0082	113.797	85.965	90.868	Ssa12007009,-,-
Ssa13008321	0	0.022	0.05	0.024	0.084	0.033	0.21	0.109	0.031	0.041	0.075	0.049	0.022	0	0.034	0.0186667	0.018	0.108	0.022	0.0493333	4.54167	2.04167	2.64286	0.017	0	0	0.00566667	0	0	0	0	0.02	0.04	0	0.12	0.039	0.258	0.139	0.06	0.063	0	0.041	0	0.294964	27.757	29.303	25.828	Ssa04015229,Hus1-like protein,Hus1
Ssa05015963	0.082	0	0.424	0.168667	0.214	0.213	1.871	0.766	0.525	0.526	0.45	0.500333	0	0.114	0.147	0.087	0.156	0.077	0.371	0.201333	4.5415	2.9664	2.31418	2.159	1.129	2.589	1.959	2.363	3.035	1.241	2.213	1.481	1.188	0.934	3.334	1.896	1.191	2.14033	0.341	0.533	0.689	0.521	1.12966	0.24342	0.123	0	0.112	Ssa08022807,EF-hand domain pair,"EF-hand_1,EF-hand_5,EF-hand_6,EF-hand_7"
Ssa11004986	0.148	0.334	0.636	0.372667	0.836	2.045	2.196	1.69233	2.245	4.576	6.357	4.39267	0.253	0.972	0.397	0.540667	2.531	0.827	2.085	1.81433	4.54114	11.7871	3.35573	0.268	0.127	0	0.131667	0.089	0.188	0.186	0.154333	15.759	5.88	18.491	1.231	0.816	2.721	1.58933	17.362	3.279	3.651	8.09733	1.17215	5.0948	54.62	33.134	28.265	Ssa02010694,Minor allergen Alt a,FMN_red
Ssa12007838	0.035	0	0.212	0.0823333	0	0	1.119	0.373	0.621	0.113	0.276	0.336667	0	0.024	0.095	0.0396667	0.134	0	0.04	0.058	4.53036	4.08907	1.46218	0	0	0	0	0	0	0	0	0	0	0	0.037	0	0.039	0.0253333	0	0	0	0	#DIV/0!	0	2.206	6.745	5.951	Ssa06019781,Phototropin-2-like,"PAS_9,Pkinase"
Ssa06018244	0.101	0.057	0.349	0.169	0.573	0.569	1.154	0.765333	0.405	0.108	0.04	0.184333	0.462	0.21	0.861	0.511	0.337	0.331	0.343	0.337	4.5286	1.09073	0.659491	2.343	3.134	3.514	2.997	11.422	10.008	14.095	11.8417	3.762	1.675	8.181	5.169	8.796	3.957	5.974	1.211	0.768	2.078	1.35233	3.95117	0.22637	7.445	3.921	3.308	Ssa01000424,Senescence-associated carboxylesterase 101-like,Lipase_3
Ssa08023279	0.247	0	1.642	0.629667	0.107	0.639	7.808	2.85133	0.492	3.682	2.312	2.162	0	0.171	0.165	0.112	1.641	0.287	0.139	0.689	4.52832	3.43356	6.15179	0	0	0	0	0	0	0	0	0.131	0.318	0	0	0	0	0	0.064	0	0	0.0213333	#DIV/0!	#DIV/0!	0	0	0	Ssa09025687,Sulfate transporter,"STAS,Sulfate_transp"
Ssa09025829	0.04	0	0.104	0.048	0.384	0.069	0.199	0.217333	0.128	0.086	0	0.0713333	0	0.111	0.108	0.073	0	0.075	0.045	0.04	4.52778	1.48611	0.547945	0.073	0.207	0.042	0.107333	0	0	0	0	0.085	0.124	0.183	0.418	0.403	0	0.273667	0.042	0.13	0.15	0.107333	0	0.392205	22.363	13.33	13.857	Ssa08022766,XS domain,XS
Ssa08022798	3.25	3.908	0.63	2.596	8.293	11.497	15.451	11.747	0.167	10.059	8.679	6.30167	0.597	2.755	0.655	1.33567	0.896	1.172	0.827	0.965	4.52504	2.42745	0.722486	1.709	1.079	0.99	1.25933	0.753	1.068	0.659	0.826667	0.111	0.649	1.548	1.744	0.736	0	0.826667	0.109	0.113	0	0.074	0.656432	0.0895161	0.893	0.451	0.57	Ssa11005367,Ankyrin repeat-containing protein At3g12360-like,"Ank_2,Ank_4,PGG"
Ssa11006268	0.043	0.016	0.025	0.028	0.013	0.038	0.329	0.126667	0.162	0.046	0.181	0.129667	0.016	0.06	0.052	0.0426667	0.041	0.013	0	0.018	4.52381	4.63095	0.421875	0	0	0.015	0.005	0	0	0	0	0	0.015	0	0	0.015	0	0.005	0	0	0	0	0	0	1.198	0.347	0.231	Ssa02011130,pectinesterase pectinesterase inhibitor,"PMEI,Pectinesterase"
Ssa02010532	0	0	0.023	0.00766667	0	0	0.104	0.0346667	0.084	0	0.103	0.0623333	0	0.073	0.118	0.0636667	0	0	0.059	0.0196667	4.52174	8.13043	0.308901	0	0	0	0	0	0	0	0	0	0	0	0	0	0	0	0	0	0	0	#DIV/0!	#DIV/0!	0	0.289	0	Ssa13008090,ankyrin repeat-containing protein,"Ank_2,PGG"
Ssa08023230	0	0	0.129	0.043	0.015	0.072	0.496	0.194333	0.107	0.624	0.431	0.387333	0.095	0.139	0.105	0.113	0.079	0.016	0.019	0.038	4.51938	9.00775	0.336283	0.061	0.029	0.105	0.065	0.441	0.447	0.421	0.436333	0.248	0.259	0.342	0.348	0.151	0.541	0.346667	0.035	0.054	0.093	0.0606667	6.71282	0.175	150.815	117.79	149.621	Ssa05015969,Ras-related protein,Ras
Ssa09024582	0.129	0.097	0.074	0.1	0.597	0.63	0.127	0.451333	0.069	0.046	0	0.0383333	0.049	0.03	0	0.0263333	0.245	0.12	0	0.121667	4.51333	0.383333	4.62025	0	0	0	0	0	0	0	0	0	0	0	0	0	0	0	0	0	0	0	#DIV/0!	#DIV/0!	145.476	112.188	123.384	Ssa08023421,"Scaffold protein for the de novo synthesis of iron- sulfur (Fe-S) clusters within mitochondria, which is required for maturation of both mitochondrial and cytoplasmic 2Fe-2S and 4Fe-4S proteins",NifU_N
Ssa07020343	0.03	0.023	0.061	0.038	0.044	0.061	0.409	0.171333	0.032	0.205	0.11	0.115667	0.034	0.147	0.072	0.0843333	0.029	0.038	0.023	0.03	4.50877	3.04386	0.355731	0	0	0	0	0	0	0	0	0	0.01	0	0	0	0	0	0.01	0	0	0.00333333	#DIV/0!	#DIV/0!	1.841	3.014	1.417	Ssa09024110,BED zinc finger,"DUF4413,Dimer_Tnp_hAT,zf-BED"
Ssa07020175	0.099	0.149	0.424	0.224	0.658	0.512	1.857	1.009	0	1.861	1.415	1.092	0.187	0.137	0.118	0.147333	0.626	0.46	0.631	0.572333	4.50446	4.875	3.88462	1.074	0.509	0.83	0.804333	0.039	0.084	0	0.041	0	0.612	0	0.034	0.033	0.037	0.0346667	0.274	0.392	0.215	0.293667	0.0509739	8.47115	14.463	12.523	7.682	Ssa02011491,NAC domain-containing protein 21,NAM
Ssa01001167	0.092	0	1.508	0.533333	0.177	0.686	6.341	2.40133	1.298	2.363	2.135	1.932	0.294	0.562	0.214	0.356667	0.386	0.069	0.167	0.207333	4.5025	3.6225	0.581308	0	0	0	0	0.022	0.071	0.07	0.0543333	0	0.191	0.063	0.077	0	0.144	0.0736667	0	0.14	0.017	0.0523333	#DIV/0!	0.710407	31.554	34.9	37.334	Ssa11005237,Belongs to the iron ascorbate-dependent oxidoreductase family,"2OG-FeII_Oxy,DIOX_N"
Ssa02010814	0.172	0.117	1.688	0.659	0.809	1.637	6.444	2.96333	0.771	1.947	2.046	1.588	1.098	1.645	1.539	1.42733	1.441	1.606	1.593	1.54667	4.49671	2.40971	1.08361	0	0	0	0	0	0	0	0	0.037	0.107	0	0	0.035	0	0.0116667	0.143	0.037	0	0.06	#DIV/0!	5.14286	1.241	11.413	5.306	Ssa07020679,Pentatricopeptide repeat-containing protein,"PPR,PPR_2,PPR_3"
Ssa01002415	0.849	0.24	0.757	0.615333	1.206	2.113	4.971	2.76333	0.86	3.27	3.734	2.62133	0.576	1.659	4.314	2.183	0.233	0.304	0.092	0.209667	4.49079	4.26002	0.0960452	0.192	0.084	0.188	0.154667	0.098	0.312	0.185	0.198333	1.02	1.566	0.056	0.407	0.294	0.218	0.306333	0.288	0.653	0.395	0.445333	1.28233	1.45375	39.546	126.109	112.114	Ssa02011971,Catalyzes the reduction of fatty acyl-CoA to fatty alcohols,"NAD_binding_4,Sterile"
Ssa07020029	0	0	0.047	0.0156667	0	0.023	0.188	0.0703333	0	0.145	0.127	0.0906667	0.062	0.038	0	0.0333333	0	0	0.031	0.0103333	4.48936	5.78723	0.31	0	0	0	0	0	0	0	0	0	0.028	0	0	0	0	0	0	0	0	0	#DIV/0!	#DIV/0!	6.958	4.33	3.55	Ssa09025323,Protein GLUTAMINE DUMPER,-
Ssa05015847	0.937	1.543	1.263	1.24767	4.32	4.988	7.49	5.59933	7.188	18.017	11.745	12.3167	2.221	3.275	3.323	2.93967	1.335	0.945	0.762	1.014	4.48784	9.87176	0.344937	0.565	0.402	0.273	0.413333	0.841	0.911	0.654	0.802	45.885	25.373	2.512	11.052	1.786	1.957	4.93167	28.645	6.96	1.054	12.2197	1.94032	2.4778	0.581	0.618	0.221	Ssa01001621,"Type I inositol 1,4,5-trisphosphate 5-phosphatase CVP2-like",Exo_endo_phos
Ssa03013361	0.054	0.487	0.185	0.242	0.842	0.604	1.811	1.08567	0.172	1.378	1.808	1.11933	0.429	2.83	2.933	2.064	0.307	0.05	0.121	0.159333	4.48623	4.62534	0.0771964	3.12	1.894	2.543	2.519	1.354	0.274	0.542	0.723333	4.563	4.222	0.673	7.278	10.091	5.159	7.50933	2.683	3.375	3.759	3.27233	0.287151	0.435769	0.532	0.849	0.485	Ssa07021653,-,-
Ssa05016846	0.027	0.031	0.07	0.0426667	0.094	0.211	0.269	0.191333	0.217	0.087	0.127	0.143667	0.124	0.113	0.097	0.111333	0.155	0	0.061	0.072	4.48438	3.36719	0.646707	0.098	0.023	0	0.0403333	0.13	0	0	0.0433333	0.144	0.14	0	0.17	0.082	0.121	0.124333	0.056	0.029	0.051	0.0453333	1.07438	0.364611	8.953	21.788	20.922	Ssa10003631,Anaphase-promoting complex subunit,"TPR_16,TPR_19,TPR_7,TPR_8"
Ssa06019410	3.757	1.959	1.043	2.253	1.507	6.438	22.354	10.0997	0.277	5.299	8.215	4.597	0.921	4.996	4.956	3.62433	0.988	0.7	0.261	0.649667	4.48276	2.04039	0.179251	19.051	8.281	25.84	17.724	0.554	0.294	0.654	0.500667	7.287	7.753	0.394	5.89	6.894	1.352	4.712	0.78	8.558	9.577	6.305	0.028248	1.33807	0.787	2.331	0.87	Ssa08022167,mTERF,mTERF
Ssa02011319	0.035	0.039	0.089	0.0543333	0	0.149	0.581	0.243333	0.166	0.111	0.108	0.128333	0	0.096	0.062	0.0526667	0	0.032	0	0.0106667	4.47853	2.36196	0.202532	0.094	0.03	0	0.0413333	0	0	0	0	0.037	0	0	0.036	0.104	0	0.0466667	0.036	0	0.032	0.0226667	0	0.485714	6.875	12.247	8.552	Ssa08022283,mRNA-binding protein involved in proper cytoplasmic distribution of mitochondria,"CLU,CLU_N,DUF727,TPR_10,TPR_12,eIF3_p135"
Ssa07020950	0.023	0	0	0.00766667	0.06	0.02	0.023	0.0343333	0.037	0.073	0	0.0366667	0.026	0	0	0.00866667	0.065	0	0	0.0216667	4.47826	4.78261	2.5	0.021	0.02	0	0.0136667	0	0	0	0	0	0.047	0	0	0.023	0	0.00766667	0	0	0	0	0	0	29.428	20.91	33.966	Ssa13008905,Cytochrome p450,p450
Ssa08022191	0.17	0	2.337	0.835667	5.468	0.881	4.877	3.742	1.357	4.35	1.726	2.47767	2.516	0.705	0	1.07367	5.492	0.792	0	2.09467	4.47786	2.9649	1.95095	0	0	0	0	0	0	0	0	0	0	1.545	0	0	0	0	0	0	0	0	#DIV/0!	#DIV/0!	2.11	3.333	2.845	Ssa11006159,Pentatricopeptide repeat-containing protein,"PPR,PPR_2"
Ssa03013250	9.075	17.705	6.378	11.0527	74.94	51.11	22.236	49.4287	221.981	123.566	124.341	156.629	569.945	183.693	85.837	279.825	78.183	70.131	82.279	76.8643	4.4721	14.1712	0.274687	5.042	2.654	3.247	3.64767	8.645	21.526	4.149	11.44	42.607	16.812	7.496	42.89	40.517	40.444	41.2837	2.355	4.012	3.072	3.14633	3.13625	0.0762125	395.869	207.118	255.389	Ssa12006783,Cytochrome c oxidase subunit VII,COX7a
Ssa05017096	0	0	0.14	0.0466667	0	0.141	0.485	0.208667	0.783	0.174	0.638	0.531667	0	0.113	0.146	0.0863333	0.31	0.457	0.184	0.317	4.47143	11.3929	3.67181	5.77	6.028	13.032	8.27667	18.197	22.668	5.957	15.6073	18.694	12.476	34.701	58.612	35.209	40.596	44.8057	9.328	12.891	17.795	13.338	1.8857	0.297686	18.735	26.15	26.416	Ssa08022502,E3 ubiquitin-protein ligase,"Ank,Ank_2,Ank_4,zf-C3HC4_3"
Ssa09025061	0.034	0	0	0.0113333	0	0.118	0.034	0.0506667	0	0	0.027	0.009	0.039	0.071	0	0.0366667	0	0.032	0.154	0.062	4.47059	0.794118	1.69091	0	0	0	0	0	0	0	0	0	0	0	0	0	0	0	0	0	0	0	#DIV/0!	#DIV/0!	7.488	8.448	7.226	Ssa10004063,"The B regulatory subunit might modulate substrate selectivity and catalytic activity, and also might direct the localization of the catalytic enzyme to a particular subcellular compartment",B56
Ssa03014164	0	0	0.1	0.0333333	0.101	0	0.346	0.149	0.558	0.497	0.455	0.503333	0	0.081	0.728	0.269667	0	0	0	0	4.47	15.1	0	0	0	0	0	0	0	0	0	0.123	0.12	0.132	0	0.117	0	0.039	0	0	0.108	0.036	#DIV/0!	0.923077	6.659	7.911	9.169	Ssa07020914,Protein of unknown function (DUF1195),DUF1195
Ssa07020803	0	0	0.024	0.008	0.024	0	0.083	0.0356667	0	0	0.022	0.00733333	0	0	0	0	0	0	0	0	4.45833	0.916667	#DIV/0!	0	0	0	0	0	0	0	0	0	0.058	0	0	0.028	0	0.00933333	0	0	0	0	#DIV/0!	0	1.616	3.654	5.4	Ssa04014697,TMV resistance protein N-like,"NB-ARC,TIR"
Ssa13009314	0.808	1.086	0.529	0.807667	2.408	3.787	4.605	3.6	5.959	4.184	4.266	4.803	4.948	6.385	4.295	5.20933	3.107	2.832	2.645	2.86133	4.45728	5.94676	0.549271	0.105	0.033	0.121	0.0863333	1.06	1.175	1.209	1.148	1.304	2.382	1.049	1.6	2.082	3.387	2.35633	0.679	0.707	0.466	0.617333	13.2973	0.261989	3.735	1.752	1.585	Ssa12007885,Myb-like DNA-binding domain,"Bromodomain,Myb_DNA-binding"
Ssa06019128	4.722	3.86	2.321	3.63433	13.421	18.561	16.592	16.1913	56.005	60.536	46.165	54.2353	36.558	22.082	30.462	29.7007	11.392	8.306	4.726	8.14133	4.4551	14.923	0.274113	0.928	1.226	0.88	1.01133	15.588	18.504	10.076	14.7227	22.51	29.649	12.772	13.824	5.635	18.413	12.624	13.479	21.722	10.555	15.252	14.5577	1.20817	12.224	18.264	11.221	Ssa10003216,7-hydroxymethyl chlorophyll a reductase,"FrhB_FdhB_C,FrhB_FdhB_N"
Ssa07021768	0.073	0	0	0.0243333	0.064	0.189	0.072	0.108333	0.35	0.078	0.057	0.161667	0	0	0	0	0.139	0	0	0.0463333	4.45205	6.64384	#DIV/0!	0	0	0	0	0	0	0	0	0.077	0	0	0.076	0.073	0	0.0496667	0	0	0	0	#DIV/0!	0	30.577	42.971	29.619	Ssa02011133,Protein ZINC INDUCED,MFS_1
Ssa09025576	0	0	0.031	0.0103333	0	0.031	0.107	0.046	0	0.039	0.028	0.0223333	0.041	0	0	0.0136667	0.79	0.202	0.122	0.371333	4.45161	2.16129	27.1707	0	0	0	0	0	0	0	0	0	0	0	0	0	0	0	0	0	0	0	#DIV/0!	#DIV/0!	20.314	28.396	28.894	Ssa13008156,isoform X1,-
Ssa01000326	0	0	0.081	0.027	0	0.081	0.279	0.12	0	1.401	0.44	0.613667	0	0	0.084	0.028	0	0	0	0	4.44444	22.7284	0	0	0	0	0	0	0	0	0	0	0.678	0	0	0	0	0	0.292	0.101	0.087	0.16	#DIV/0!	#DIV/0!	0.056	0.111	0.228	Ssa13008093,ankyrin repeat-containing protein,"Ank_2,PGG"
Ssa02011198	0.89	1.148	0.71	0.916	3.811	4.993	3.394	4.066	5.276	0.948	0.893	2.37233	2.676	1.494	2.554	2.24133	1.087	1.006	0.43	0.841	4.43886	2.58988	0.375223	0	0.055	0	0.0183333	0.152	0.162	0.32	0.211333	0.067	0	0.144	0.066	0.064	0	0.0433333	0	0.069	0.118	0.0623333	11.5273	1.43846	13.46	22.465	24.028	Ssa04015312,Protein SYS1 homolog,SYS1
Ssa07020341	0.081	0.291	0.023	0.131667	0.577	0.292	0.884	0.584333	0.043	0.346	0.074	0.154333	0	0.084	0.024	0.036	0	0	0.031	0.0103333	4.43797	1.17215	0.287037	0.527	0.883	0.583	0.664333	0.503	0.155	0.987	0.548333	1.937	2.04	0.015	0.38	0.285	0.091	0.252	2.376	0.703	0.454	1.17767	0.825389	4.67328	0	0	0.184	Ssa13008444,RESISTANCE protein,"LRR_3,LRR_8,NB-ARC,TIR"
Ssa01001187	0.181	0	0.052	0.0776667	0	0.26	0.774	0.344667	0.096	0.321	0.423	0.28	0.069	0.25	0.215	0.178	0.057	0.224	0.068	0.116333	4.43777	3.60515	0.653558	0.109	0.052	0	0.0536667	0	0.153	0	0.051	0.128	0.062	0.068	0.063	0.06	0	0.041	0	0.195	0.056	0.0836667	0.950311	2.04065	11.1	14.359	10.899	Ssa10004142,Protein of unknown function (DUF493),DUF493
Ssa01000301	0	0	0.076	0.0253333	0	0.076	0.261	0.112333	0.562	0.188	0.275	0.341667	0	0.061	0.393	0.151333	0.502	0	0.297	0.266333	4.43421	13.4868	1.75991	0	0	0	0	0	0	0	0	0	0	0	0	0	0.196	0.0653333	0.091	0	0.082	0.0576667	#DIV/0!	0.882653	1.227	1.305	0.792	Ssa11006388,Protein SHOOT GRAVITROPISM,"zf-C2H2,zf-met"
Ssa03013333	1.099	2.345	1.889	1.77767	11.361	6.961	5.316	7.87933	12.678	5.339	5.151	7.72267	22.66	8.193	8.182	13.0117	8.936	10.696	5.506	8.37933	4.4324	4.34427	0.643986	1.106	0.943	0.641	0.896667	2.048	2.177	1.536	1.92033	2.329	2.521	1.387	4.445	1.836	1.225	2.502	2.029	1.848	2.729	2.202	2.14164	0.880096	0.103	0.287	0.211	Ssa02009535,-,-
Ssa12007953	0.089	0	0.254	0.114333	0.232	0.409	0.878	0.506333	0.709	0.536	0.67	0.638333	0.168	0.348	0.476	0.330667	0.309	0.055	0.133	0.165667	4.42857	5.58309	0.501008	0	0	0	0	0.035	0.038	0	0.0243333	0	0.061	0	0.062	0	0.066	0.0426667	0	0.032	0	0.0106667	#DIV/0!	0.25	0	0	0	Ssa09024113,Belongs to the cytochrome P450 family,p450
Ssa08023758	0	0	0.049	0.0163333	0	0.049	0.168	0.0723333	0.09	0.06	0	0.05	0	0	0	0	0	0	0	0	4.42857	3.06122	#DIV/0!	0.051	0	0.059	0.0366667	0	0	0.071	0.0236667	0	0.058	0	0	0.057	0	0.019	0	0	0	0	0.645455	0	18.353	22.297	23.441	Ssa03013442,Elongator complex protein,PAXNEB
Ssa09023994	0.315	0.385	3.152	1.284	0.205	1.109	15.737	5.68367	4.269	6.51	7.737	6.172	0.447	1.45	1.498	1.13167	2.938	0.855	0.709	1.50067	4.42653	4.80685	1.32607	0.427	0.18	0.083	0.23	0.063	0.167	0.132	0.120667	0.278	3.624	1.846	0.681	1.103	0.759	0.847667	0.408	0.68	0.098	0.395333	0.524638	0.466378	2.284	9.529	8.325	Ssa07021650,Alpha/beta hydrolase family,Abhydrolase_1
Ssa03012813	0.071	0.053	0.132	0.0853333	0.103	0.224	0.806	0.377667	0.075	0.378	0.258	0.237	0.081	0.147	0.148	0.125333	0.101	0.011	0.067	0.0596667	4.42578	2.77734	0.476064	1.262	1.206	1.773	1.41367	1.584	0.947	1.322	1.28433	2.115	1.524	0.577	3.022	1.741	0.882	1.88167	1.668	0.958	1.375	1.33367	0.908512	0.708769	32.149	19.038	16.172	Ssa03012688,Belongs to the MIP aquaporin (TC 1.A.8) family,MIP
Ssa11005923	7.619	4.918	9.459	7.332	22.379	39.54	35.379	32.4327	19.443	26.5	24.552	23.4983	23.971	16.209	24.326	21.502	11.616	14.362	6.019	10.6657	4.42344	3.2049	0.496031	3.347	2.693	2.657	2.899	0.485	0.87	1.209	0.854667	1.69	1.724	1.84	1.606	1.624	0.508	1.246	0.394	0.52	0.401	0.438333	0.294814	0.351792	0.245	0.538	0.335	Ssa02011876,transcription factor,HLH
Ssa01001263	13.337	8.494	8.41	10.0803	41.772	53.376	38.455	44.5343	9.441	28.941	28.182	22.188	11.789	23.352	21.965	19.0353	13.615	15.862	10.074	13.1837	4.41794	2.20112	0.692589	4.326	2.8	2.234	3.12	1.869	2.468	2.616	2.31767	7.165	13.079	4.458	6.787	7.632	5.586	6.66833	4.91	6.901	7.749	6.52	0.742842	0.977756	4.659	15.976	8.761	Ssa13008757,of pyruvate dehydrogenase complex,"2-oxoacid_dh,Biotin_lipoyl,E3_binding"
Ssa02011379	1.057	0.609	2.428	1.36467	2.908	4.882	10.288	6.026	3.101	5.038	6.286	4.80833	5.502	4.089	5.878	5.15633	7.258	5.589	5.642	6.163	4.41573	3.52345	1.19523	0.352	0.259	0.159	0.256667	0.362	0.357	0.515	0.411333	0.8	1.937	0.637	0.583	0.606	0.673	0.620667	1.232	0.536	0.743	0.837	1.6026	1.34855	0.363	0.272	0.233	Ssa09025320,Histidine kinase,"HATPase_c,HisKA,Response_reg"
Ssa09025149	4.295	3.177	2.997	3.48967	10.595	18.789	16.801	15.395	5.083	24.825	24.145	18.0177	6.477	21.124	23.368	16.9897	2.051	3.474	1.917	2.48067	4.4116	5.16315	0.14601	0.039	0.019	0	0.0193333	0.026	0.222	0	0.0826667	0	1.957	0	0.136	0	0.073	0.0696667	0.023	0	0	0.00766667	4.27586	0.110048	3.798	89.288	11.304	Ssa02009895,-,-
Ssa13008982	1.817	0.704	3.051	1.85733	6.906	5.712	11.961	8.193	9.699	1.301	1.207	4.069	1.543	1.744	1.356	1.54767	0.773	0.606	0.153	0.510667	4.41116	2.19078	0.329959	1.056	2.187	3.102	2.115	4.319	4.21	3.443	3.99067	3.849	2.714	3.295	2.847	1.522	2.9	2.423	2.899	1.055	1.565	1.83967	1.88684	0.759252	2.229	1.27	2.176	Ssa08022280,SpoU rRNA Methylase family,SpoU_methylase
Ssa09025052	0	0.455	0	0.151667	0.787	0.521	0.697	0.668333	0	0.966	0.314	0.426667	0	0.626	0.899	0.508333	0	0	0.113	0.0376667	4.40659	2.81319	0.0740984	2.552	1.382	2.429	2.121	1.567	0.256	0.127	0.65	1.28	1.662	0.686	1.988	2.219	0.785	1.664	3.552	6.309	3.841	4.56733	0.306459	2.74479	85.111	69.274	77.009	Ssa11005448,Ubiquitin fusion degradation protein 1 homolog,UFD1
Ssa04015065	0.069	0.196	0.327	0.197333	0.723	1.197	0.686	0.868667	6.42	1.367	2.084	3.29033	5.207	2.013	4.333	3.851	6.816	4.165	2.695	4.55867	4.40203	16.674	1.18376	0.031	0.03	0	0.0203333	0	0	0.044	0.0146667	0.698	0.393	2.362	1.478	1.494	1.004	1.32533	5.864	4.982	1.291	4.04567	0.721311	3.05257	0	0	0	Ssa05016312,peptidase inhibitor activity,CAP
Ssa08022915	0.03	0	0	0.01	0.077	0.026	0.029	0.044	0.189	0.157	0.807	0.384333	0.235	0.347	0.237	0.273	0.168	0.138	0.533	0.279667	4.4	38.4333	1.02442	0	0	0	0	0	0	0	0	0	0.03	0	0	0	0	0	0	0	0	0	#DIV/0!	#DIV/0!	1.382	3.221	2.633	Ssa10004060,WD repeat-containing protein,-
Ssa07021520	0	0	0.065	0.0216667	0	0.11	0.176	0.0953333	0	0.054	0.02	0.0246667	0.058	0.018	0.023	0.033	0	0	0	0	4.4	1.13846	0	0	0	0	0	0	0	0	0	0	0	0	0	0	0	0	0	0	0	0	#DIV/0!	#DIV/0!	1.91	0.066	0.757	Ssa12006780,-,-
Ssa02010629	0.047	0.159	0.444	0.216667	0	1.094	1.764	0.952667	40.405	90.58	39.263	56.7493	0	0.032	0	0.0106667	0.624	1.225	0.053	0.634	4.39692	261.92	59.4375	0.255	0.282	0.148	0.228333	0	0	0.59	0.196667	194.605	1168.35	7.837	285.938	0.706	12.658	99.7673	86.837	434.965	0.743	174.182	0.861314	1.74588	0	0.897	0.307	Ssa02011387,ABC transporter,"ABC_membrane_2,ABC_tran,PWWP,SET,zf-HC5HC2H_2"
Ssa08022232	1.079	0.634	2.484	1.399	3.058	5.124	10.267	6.14967	3.274	5.245	6.303	4.94067	5.477	4.119	5.878	5.158	7.381	5.649	5.642	6.224	4.39576	3.53157	1.20667	0.352	0.278	0.159	0.263	0.362	0.357	0.515	0.411333	0.777	1.915	0.637	0.583	0.562	0.673	0.606	1.232	0.513	0.723	0.822667	1.56401	1.35754	32.671	29.99	23.193	Ssa01001745,Protein of unknown function (DUF502),DUF502
Ssa05016541	0	0	0.023	0.00766667	0	0.047	0.054	0.0336667	0	0	0.043	0.0143333	0	0	0.024	0.008	0	0	0	0	4.3913	1.86957	0	0	0.023	0	0.00766667	0.065	0.069	0.206	0.113333	0	0	0.186	0.085	0.055	0.03	0.0566667	0.028	0.029	0	0.019	14.7826	0.335294	2.925	2.074	1.875	Ssa06018083,PLATZ transcription factor,PLATZ
Ssa09025346	0.072	0.036	0.097	0.0683333	0.091	0.195	0.613	0.299667	0.219	0.146	0.22	0.195	0.101	0.212	0.273	0.195333	0.046	0.083	0.018	0.049	4.38537	2.85366	0.250853	0.015	0.021	0.008	0.0146667	0	0	0	0	0.051	2.369	0.009	0.059	0.024	0.027	0.0366667	0.033	0.026	0.022	0.027	0	0.736364	337.519	516.44	450.929	Ssa06017944,Heat shock cognate 70 kDa,HSP70
Ssa01002432	0.095	0.108	0.246	0.149667	0.083	0	1.885	0.656	0.457	0.61	1.116	0.727667	0.108	0	0	0.036	0.996	0.622	1.719	1.11233	4.38307	4.86192	30.8981	0.604	0	1.1	0.568	0	0.243	0.599	0.280667	2.322	1.082	8.552	0.396	0	0	0.132	7.222	7.726	5.944	6.964	0.494131	52.7576	0.629	0.974	0.438	Ssa05017233,Cytochrome c biogenesis protein,ResB
Ssa12007754	0.211	1.433	1.998	1.214	4.779	6.816	4.357	5.31733	2.532	1.352	2.752	2.212	1.043	2.096	2.77	1.96967	0.937	2.594	1.509	1.68	4.38001	1.82208	0.852936	0	0	0	0	0	0.269	0	0.0896667	0	0.036	0	0	0	0	0	0	0	0	0	#DIV/0!	#DIV/0!	0	0	0	Ssa06017553,-,-
Ssa04014386	0.172	0.124	0.296	0.197333	0.892	0.953	0.743	0.862667	0.513	0.668	0.507	0.562667	0.535	0.677	1.657	0.956333	0.595	0.343	0.582	0.506667	4.37162	2.85135	0.529801	0.206	0.181	0.074	0.153667	0.206	0.1	0.138	0.148	0.398	0.372	0.098	0.309	0.22	0.331	0.286667	0.463	0.338	0.466	0.422333	0.963124	1.47326	64.986	133.173	115.557	Ssa01000667,OTU domain-containing protein,OTU
Ssa03012987	0.062	0	0.24	0.100667	0.054	0.375	0.889	0.439333	1.188	0.562	0.508	0.752667	0.317	0.129	0.36	0.268667	0.765	0.144	0.07	0.326333	4.36424	7.47682	1.21464	0	0	0	0	0	0	0.039	0.013	0	0.064	0.035	0.032	0.062	0.173	0.089	0.064	0.033	0.058	0.0516667	#DIV/0!	0.580524	6.354	2.491	9.345	Ssa05016559,Belongs to the 'GDSL' lipolytic enzyme family,Lipase_GDSL
Ssa04014738	1.185	2.265	0.47	1.30667	2.298	3.7	11.092	5.69667	0.291	28.67	16.588	15.183	0	8.006	6.514	4.84	0.087	0.085	0.205	0.125667	4.35969	11.6196	0.0259642	0.248	0.156	0.096	0.166667	0.218	0	0.344	0.187333	27.043	18.626	0.828	3.318	1.279	4.266	2.95433	0.095	0.197	0.17	0.154	1.124	0.0521268	0	0.025	0	Ssa13008511,receptor-like serine threonine-protein kinase,"LRR_8,Malectin_like,Pkinase,Pkinase_Tyr"
Ssa10004371	0.612	0.691	2.921	1.408	2.424	6.753	9.215	6.13067	5.538	6.887	5.523	5.98267	6.424	2.069	2.49	3.661	6.138	3.168	2.759	4.02167	4.35417	4.24905	1.09852	0.062	0.058	0	0.04	0.081	0.087	0	0.056	0.072	0.281	0.077	0.071	0	0.076	0.049	0	0.147	0.127	0.0913333	1.4	1.86395	0.908	19.066	12.156	Ssa05016079,Tumour-associated protein,Membralin
Ssa01002836	0.398	0.225	1.324	0.649	0.216	0.816	7.427	2.81967	5.003	1.802	2.214	3.00633	0.849	7.187	6.395	4.81033	0	0.324	0.112	0.145333	4.34463	4.63225	0.0302127	22.379	13.823	28.076	21.426	43.89	49.432	72.082	55.1347	45.728	34.532	67.32	70.319	69.279	71.362	70.32	7.123	6.342	9.351	7.60533	2.57326	0.108153	0	0	0	Ssa03012569,1-aminocyclopropane-1-carboxylate synthase,Aminotran_1_2
Ssa13009178	2.222	0.88	4.238	2.44667	13.144	14.227	4.452	10.6077	2.58	5.66	14.174	7.47133	1.839	2.714	2.371	2.308	40.107	21.479	20.096	27.2273	4.33556	3.05368	11.7969	5.147	3.144	4.785	4.35867	2.523	2.13	2.685	2.446	2.812	3.9	2.065	1.68	1.909	1.865	1.818	0.839	0.624	1.021	0.828	0.561181	0.455446	154.648	79.113	113.21	Ssa08023693,-,AvrRpt-cleavage
Ssa08023354	0	0	0.179	0.0596667	0	0.036	0.74	0.258667	1.063	0.621	0.552	0.745333	0.142	0.187	0.056	0.128333	0.138	0.039	0.047	0.0746667	4.3352	12.4916	0.581818	0.019	0.018	0	0.0123333	0.025	0	0	0.00833333	0.154	0.429	0.024	0.065	0.063	0.046	0.058	0.043	0.045	0	0.0293333	0.675676	0.505747	1.001	1.234	2.072	Ssa05017363,Myb-related protein,Myb_DNA-binding
Ssa02011094	0.016	0.018	0.042	0.0253333	0.028	0.014	0.287	0.109667	0.129	0.052	0.126	0.102333	0.055	0.1	0.029	0.0613333	0.015	0.015	0	0.01	4.32895	4.03947	0.163043	0	0.028	0	0.00933333	0	0	0	0	0.017	0.017	0.018	0.017	0	0.036	0.0176667	0	0	0	0	0	0	14.162	15.354	21.488	Ssa01000959,protein C4orf29 homolog,DUF2048
Ssa09025658	10.696	6.018	28.302	15.0053	62.946	116.026	15.89	64.954	133.041	111.62	149.805	131.489	3.125	4.449	9.882	5.81867	53.378	37.643	23.599	38.2067	4.32873	8.7628	6.56622	2.672	2.391	2.064	2.37567	0.785	1.043	1.133	0.987	145.354	306.358	23.458	51.346	4.025	11.689	22.3533	691.355	316.328	9.804	339.162	0.415462	15.1728	0.801	0.969	1.837	Ssa01001493,ankyrin repeat-containing protein,"Ank_2,PGG"
Ssa12006583	0.631	0.219	4.924	1.92467	0.633	2.978	21.381	8.33067	4.732	23.665	23.405	17.2673	2.156	2.452	6.16	3.58933	6.553	0.815	0.712	2.69333	4.32837	8.9716	0.750371	2.771	1.042	0	1.271	0.058	0.247	0.183	0.162667	0	2.757	0.717	0.101	0	0	0.0336667	0.101	0.052	0.09	0.081	0.127983	2.40594	0	0	0	Ssa01001973,Periodic tryptophan protein 1 homolog,WD40
Ssa03014139	5.718	9.32	39.437	18.1583	8.593	59.465	167.673	78.577	184.465	130.113	332.451	215.676	3.068	5.423	199.77	69.4203	45.405	14.765	38.391	32.8537	4.32732	11.8775	0.473257	0	0	0	0	0	0	0	0	0	0.084	0	0	0	0	0	0	0.088	0	0.0293333	#DIV/0!	#DIV/0!	4.161	3.154	2.212	Ssa01001044,Glutaredoxin,Glutaredoxin
Ssa07021027	0	0	0.055	0.0183333	0	0.111	0.127	0.0793333	0	0	0	0	0	0.044	0.057	0.0336667	0.183	0	0	0.061	4.32727	0	1.81188	0	0	0	0	0	0.082	0	0.0273333	0	0	0	0	0	0	0	0	0.069	0.06	0.043	#DIV/0!	#DIV/0!	13.549	7.06	6.046	Ssa02011623,-,-
Ssa01002208	0	0	0.052	0.0173333	0.053	0.052	0.12	0.075	0.388	0.065	0.047	0.166667	0	0.042	0.109	0.0503333	0	0	0	0	4.32692	9.61538	0	0	0	0	0	0	0	0	0	0	0	0	0	0	0	0	0	0	0	0	#DIV/0!	#DIV/0!	213.888	120.963	308.594	Ssa09025006,fructose-bisphosphate aldolase,Glycolytic
Ssa03012512	26.609	11.166	32.291	23.3553	88.401	113.071	101.528	101	17.619	134.279	145.853	99.2503	7.898	28.067	39.46	25.1417	12.285	12.93	8.552	11.2557	4.32449	4.24958	0.44769	9.9	3.212	1.572	4.89467	5.202	5.084	17.072	9.11933	353.415	354.058	124.515	107.922	41.282	27.312	58.8387	125.933	19.101	4.461	49.8317	1.86312	0.84692	7.205	12.325	8.753	Ssa01002539,Monoglyceride,Hydrolase_4
Ssa06019387	0.088	0.248	0.075	0.137	1.207	0.151	0.419	0.592333	0.443	0.452	0.571	0.488667	0.15	0.162	0.052	0.121333	0.292	0.272	0.313	0.292333	4.3236	3.56691	2.40934	0.013	0.013	0	0.00866667	0.105	0.205	0.147	0.152333	0.232	0.422	0.066	0.046	0.044	0.065	0.0516667	0.091	0.063	0.054	0.0693333	17.5769	1.34194	1.809	2.198	2.698	Ssa08022434,-,-
Ssa09025353	8.297	3.031	16.305	9.211	34.927	43.431	41.058	39.8053	67.662	21.732	26.494	38.6293	66.159	19.647	56.115	47.307	22.128	12.294	8.296	14.2393	4.3215	4.19383	0.300998	0.78	1.035	1.059	0.958	1.356	2.162	3.033	2.18367	3.939	2.947	3.887	3.789	2.048	0.357	2.06467	0.562	0.559	1.192	0.771	2.2794	0.373426	0	0	0	Ssa07020385,Encoded by,-
Ssa13008422	3.896	3.259	3.359	3.50467	4.634	7.954	32.813	15.1337	4.865	31.258	9.985	15.3693	3.217	2.876	4.225	3.43933	2.407	3.234	2.459	2.7	4.31815	4.38539	0.785036	4.801	5.768	1.168	3.91233	1.228	1.342	1.436	1.33533	2.296	15.354	0.333	0.563	0.602	0.702	0.622333	0.563	0.237	0.641	0.480333	0.341314	0.771826	0.305	1.376	0.894	Ssa02009942,CW-type Zinc Finger,zf-CW
Ssa13008723	0.06	0.023	0	0.0276667	0.035	0.086	0.237	0.119333	0.223	0.043	0.109	0.125	0.023	0.041	0.196	0.0866667	0.038	0.037	0.022	0.0323333	4.31325	4.51807	0.373077	0.054	0.051	0	0.035	0	0.051	0.075	0.042	0.127	0.041	0.113	0.083	0.08	0.067	0.0766667	0.083	0.043	0.037	0.0543333	1.2	0.708696	81.769	150.575	131.946	Ssa04015559,"Plant lipoxygenase may be involved in a number of diverse aspects of plant physiology including growth and development, pest resistance, and senescence or responses to wounding","Lipoxygenase,PLAT"
Ssa09024604	20.493	14.658	16.584	17.245	57.089	116.078	49.385	74.184	17.437	94.474	88.609	66.84	10.717	11.654	18.586	13.6523	38.038	37.742	18.547	31.4423	4.30177	3.87591	2.30307	5.804	5.023	2.989	4.60533	4.169	4.331	6.267	4.92233	25.735	61.969	40.799	10.613	6.424	9.521	8.85267	37.372	15.137	8.765	20.4247	1.06883	2.30718	84.25	53.623	30.265	Ssa12007664,Protein of unknown function (DUF1442),DUF1442
Ssa13009200	0	0	0.07	0.0233333	0	0.14	0.161	0.100333	0	0	0.032	0.0106667	0.046	0	0	0.0153333	0	0	0.046	0.0153333	4.3	0.457143	1	0.037	0.139	0.043	0.073	0	0	0	0	0	0	0	0	0	0	0	0	0	0	0	0	#DIV/0!	12.144	8.331	9.186	Ssa03013875,Belongs to the AAA ATPase family,AAA
Ssa03012374	0	0	0.256	0.0853333	0.097	0.193	0.81	0.366667	0.832	0.833	0.669	0.778	0.466	0.103	0.166	0.245	0.849	0.069	0	0.306	4.29688	9.11719	1.24898	0	0.032	0	0.0106667	0.045	0	0	0.015	0.079	0.192	0	0	0	0	0	0	0	0	0	1.40625	#DIV/0!	1.631	1.078	1.104	Ssa04015079,Pentatricopeptide repeat-containing protein,"PPR,PPR_2"
Ssa09024929	0	0	0.405	0.135	0.273	0.611	0.856	0.58	0.753	0.084	0.123	0.32	0.089	0	0.07	0.053	0	0	0	0	4.2963	2.37037	0	0	0	0	0	0	0	0	0	0	0	0	0.082	0	0	0.0273333	0	0	0	0	#DIV/0!	0	24.497	25.505	24.436	Ssa12006732,4-coumarate--CoA ligase-like,"AMP-binding,AMP-binding_C"
Ssa11006414	0.115	0	0.297	0.137333	0.201	0.199	1.37	0.59	1.014	0.677	0.225	0.638667	0.46	0.279	1.134	0.624333	0.055	0	0.911	0.322	4.29612	4.65049	0.51575	0	0	0	0	0	0	0	0	0	0	0	0	0	0	0	0.18	0	0	0.06	#DIV/0!	#DIV/0!	0	0	0	Ssa11005162,Late embryogenesis abundant (LEA) group 1,LEA_1
Ssa09025952	0	0	0.223	0.0743333	0.136	0.359	0.463	0.319333	0.664	0.166	0.325	0.385	0.059	0.108	0.186	0.117667	0.049	0.048	0.117	0.0713333	4.29596	5.17937	0.606232	0.753	0.669	0.6	0.674	0.062	0.265	0.392	0.239667	1.157	2.092	0.827	0.973	0.156	0.29	0.473	16.244	10.788	1.597	9.543	0.355589	20.1755	0.033	0.208	0.03	Ssa02009549,Trihelix transcription factor,Myb_DNA-bind_4
Ssa03012897	0.418	0	0.323	0.247	0.545	0.902	1.736	1.061	2.203	1.604	1.24	1.68233	0.761	0.347	0.261	0.456333	1.152	0.234	0.188	0.524667	4.29555	6.81107	1.14974	0.227	0.036	0	0.0876667	0	0	0	0	0.044	0.129	0	0	0	0	0	0	0	0	0	0	#DIV/0!	0	0	0.058	Ssa06019571,Belongs to the UDP-glycosyltransferase family,UDPGT
Ssa08022672	0.043	0	0.11	0.051	0.037	0.073	0.547	0.219	0.136	0.77	0.398	0.434667	0.194	0.235	0.228	0.219	0.04	0	0.096	0.0453333	4.29412	8.52288	0.207002	0	0	0	0	0	0	0	0	0	0.044	0	0	0	0	0	0	0	0	0	#DIV/0!	#DIV/0!	9.641	10.088	9.258	Ssa03013671,Belongs to the protein kinase superfamily,"Pkinase,Pkinase_Tyr"
Ssa13009003	0.355	0.086	1.482	0.641	1.521	0.964	5.77	2.75167	5.185	1.947	3.803	3.645	0.173	0.965	1.133	0.757	4.82	0.709	1.544	2.35767	4.29277	5.68643	3.11449	1.769	0.805	0.745	1.10633	0.334	0.323	0.383	0.346667	0.645	0.733	3.313	2.004	0.814	0.226	1.01467	2.001	2.083	3.636	2.57333	0.313347	2.53614	17.193	13.546	15.83	Ssa08022232,Vacuolar protein sorting-associated protein 62,Vps62
Ssa09025345	0.202	0.144	0.219	0.188333	0.48	0.587	1.356	0.807667	0.255	0.578	0.971	0.601333	0.52	0.5	1.537	0.852333	0.333	0.139	0.048	0.173333	4.2885	3.19292	0.203363	0.048	0.027	0.056	0.0436667	0.522	0.298	0.548	0.456	0.833	1.118	1.291	3.591	2.45	0.888	2.30967	0.254	0.287	0.237	0.259333	10.4427	0.112282	1.42	1.813	1.294	Ssa06019051,Belongs to the class I-like SAM-binding methyltransferase superfamily. Cation-independent O- methyltransferase family,"Dimerisation,Methyltransf_2"
Ssa02011999	0.287	0.274	0.815	0.458667	0.518	0.248	5.13	1.96533	0.811	8.33	3.103	4.08133	0.829	0.595	0.453	0.625667	0.713	0.658	1.045	0.805333	4.28488	8.89826	1.28716	4.357	4.488	2.085	3.64333	1.137	0.843	1.415	1.13167	1.52	2.915	0.727	1.285	1.593	1.23	1.36933	1.604	1.574	1.931	1.703	0.310613	1.24367	2.482	1.221	1.093	Ssa08023006,Diacylglycerol kinase,"DAGK_acc,DAGK_cat"
Ssa13009201	0.041	0.009	0.105	0.0516667	0.071	0.119	0.473	0.221	0.039	0.104	0.241	0.128	0	0.073	0.138	0.0703333	0.015	0.015	0.018	0.016	4.27742	2.47742	0.227488	0.007	0.028	0.034	0.023	0.068	0.041	0.082	0.0636667	0.034	0.033	0.018	0.135	0.122	0.054	0.103667	0.067	0.088	0.106	0.087	2.76812	0.839228	2.601	2.789	3.37	Ssa01000072,NAD(P)-binding Rossmann-like domain,NAD_binding_8
Ssa09024369	0	0	0.552	0.184	0.027	0	2.331	0.786	0.196	0.196	0	0.130667	0	0.783	0.164	0.315667	0	0	0.034	0.0113333	4.27174	0.710145	0.0359029	0	0	0	0	0	0	0	0	0	0	0	0	0	0	0	0	0	0	0	#DIV/0!	#DIV/0!	2.32	3.563	4.468	Ssa11005507,Belongs to the multi antimicrobial extrusion (MATE) (TC 2.A.66.1) family,MatE
Ssa01001196	0.068	0.077	0.058	0.0676667	0.355	0.176	0.336	0.289	0	0.435	0.584	0.339667	0.619	1.082	0.364	0.688333	0.581	0.063	0.153	0.265667	4.27094	5.0197	0.385956	0.062	0.117	0	0.0596667	0	0	0	0	0.504	0.14	0	0.141	0.136	0.152	0.143	0.353	0.514	0.253	0.373333	0	2.61072	7.729	13.139	12.243	Ssa03013168,Exostosin family,Exostosin
Ssa11004944	0	0	0.096	0.032	0.039	0.019	0.352	0.136667	0.036	0.071	0.122	0.0763333	0.076	0.031	0.04	0.049	0.148	0.083	0.1	0.110333	4.27083	2.38542	2.2517	0	0	0	0	0.027	0.028	0	0.0183333	0	0	0.025	0.023	0	0.025	0.016	0	0	0.062	0.0206667	#DIV/0!	1.29167	1.444	1.21	1.382	Ssa01000552,Cystinosin homolog,PQ-loop
Ssa07021223	1.748	1.007	5.212	2.65567	5.215	6.542	22.243	11.3333	60.654	18.711	16.598	31.9877	25.829	21.809	38.117	28.585	7.556	4.375	0.889	4.27333	4.2676	12.0451	0.149496	0	0	0	0	0	0	0	0	0.036	0.318	0	0	0	0	0	0	0.037	0	0.0123333	#DIV/0!	#DIV/0!	2.486	7.747	5	Ssa08022362,Belongs to the GRAS family,GRAS
Ssa08021901	0.574	0.474	3.962	1.67	4.509	3.126	13.71	7.115	8.565	0.353	2.051	3.65633	0.377	0.031	0.532	0.313333	0.461	0.123	0	0.194667	4.26048	2.18942	0.621277	2.019	2.234	1.436	1.89633	10.943	12.305	19.535	14.261	2.549	3.393	2.808	1.01	0.642	0.049	0.567	0.389	0.31	0.596	0.431667	7.5203	0.761317	21.999	11.003	9.648	Ssa07021218,transcription factor,"Lectin_legB,bZIP_1"
Ssa02011721	0.574	0.424	3.981	1.65967	4.662	2.782	13.732	7.05867	8.565	0.424	2.068	3.68567	0.377	0.031	0.513	0.307	0.461	0.123	0	0.194667	4.25306	2.22073	0.634093	2.039	2.216	1.482	1.91233	11.128	11.603	19.591	14.1073	2.619	3.416	2.958	0.964	0.597	0.049	0.536667	0.389	0.31	0.699	0.466	7.37703	0.868323	5.313	0.942	1.183	Ssa04014327,-,-
Ssa01001768	1.314	0.384	1.713	1.137	1.263	3.456	9.784	4.83433	2.345	1.054	2.716	2.03833	1.372	0.812	3.506	1.89667	0.661	0.432	0.035	0.376	4.25183	1.79273	0.198243	0	0	0	0	0	0	0	0	0	0.128	0	0	0	0.017	0.00566667	0	0	0	0	#DIV/0!	0	0.989	1.409	1.094	Ssa11005040,Ring finger domain,zf-RING_2
Ssa06017670	4.846	2.632	3.282	3.58667	13.61	12.311	19.818	15.2463	0.149	9.239	7.205	5.531	0.955	12.18	11.236	8.12367	0.354	0.781	0.945	0.693333	4.25084	1.5421	0.0853473	28.607	32.061	42.25	34.306	165.622	74.966	71.234	103.941	89.547	82.217	28.154	145.35	127.406	59.497	110.751	24.959	35.454	51.27	37.2277	3.02981	0.336138	8.761	7.744	3.026	Ssa05016952,Belongs to the cullin family,"Cullin,Cullin_Nedd8"
Ssa02009720	21.257	11.761	4.418	12.4787	27.691	77.433	54.006	53.0433	1389.2	771.02	572.747	910.988	578.405	249.55	292.139	373.365	84.729	48.095	25.562	52.7953	4.25072	73.0036	0.141404	1.459	0.744	1.106	1.103	6.531	9.466	2.337	6.11133	18.121	12.598	4.505	3.351	3.975	28.104	11.81	2.573	2.746	2.885	2.73467	5.54065	0.231555	23.176	27.186	32.188	Ssa10004468,E3 ubiquitin-protein ligase,"zf-C3HC4,zf-RING_2"
Ssa08023506	0.089	0	1.686	0.591667	0.31	2.542	4.678	2.51	124.389	172.357	75.882	124.209	0.102	0	0.797	0.299667	8.986	1.164	3.72	4.62333	4.24225	209.931	15.4283	0.404	0.766	0.749	0.639667	0.321	0.227	0.673	0.407	269.688	1201.86	16.822	220.251	7.691	9.643	79.195	90.955	716.035	2.326	269.772	0.636269	3.40643	21.044	35.073	31.425	Ssa03012962,ABC transporter F family member,"ABC_tran,ABC_tran_Xtn"
Ssa08023052	0.111	0.503	0.191	0.268333	0.581	0.961	1.872	1.138	0	1.662	1.652	1.10467	0	0.77	0.398	0.389333	1.692	0.622	0.251	0.855	4.24099	4.11677	2.19606	1.008	0.86	0.584	0.817333	0.267	0.425	0.14	0.277333	2.595	1.264	0.126	2.315	1.004	0.496	1.27167	1.849	1.564	0.207	1.20667	0.339315	0.948886	223.959	80.848	91.801	Ssa07020768,Cytochrome b-c1 complex subunit,Cyt_b-c1_8
Ssa08022409	1.461	1.651	1.583	1.565	6.518	8.23	5.154	6.634	7.306	1.693	1.687	3.562	3.544	1.758	4.597	3.29967	1.63	1.776	0.644	1.35	4.23898	2.27604	0.409132	0.115	0.055	0	0.0566667	0.152	0.243	0.479	0.291333	0.135	0	0.433	0.066	0.064	0	0.0433333	0.198	0.275	0.118	0.197	5.14118	4.54615	0.994	9.573	4.463	Ssa06018750,No apical meristem (NAM) protein,NAM
Ssa04015269	0.428	0.193	0.956	0.525667	0.744	2.291	3.64	2.225	2.597	0.912	2.339	1.94933	2.825	1.065	0.153	1.34767	2.521	1.116	3.376	2.33767	4.23272	3.70831	1.7346	0	0	0	0	0	0	0	0	0	0	0	0	0	0	0	0	0	0	0	#DIV/0!	#DIV/0!	4.013	5.14	4.907	Ssa05016888,Pollen proteins Ole e I like,Pollen_Ole_e_I
Ssa12007169	6.872	8.359	26.336	13.8557	36.393	104.705	34.509	58.5357	530.957	345.329	338.339	404.875	19.854	13.452	11.803	15.0363	18.582	12.115	11.914	14.2037	4.22467	29.2209	0.944623	14.934	10.522	28.404	17.9533	31.653	37.678	63.533	44.288	2909.18	2520.72	620.295	614.17	93.143	250.55	319.288	4062.33	3271.61	360.198	2564.71	2.46684	8.03261	17.83	19.38	12.765	Ssa13009199,Wound-induced protein,WI12
Ssa13009329	7.045	2.605	11.815	7.155	21.945	48.739	19.994	30.226	10.045	5.208	6.959	7.404	6.825	2.044	8.745	5.87133	12.61	6.817	6.38	8.60233	4.22446	1.0348	1.46514	0.038	0	0	0.0126667	0	0.4	0	0.133333	0	0.238	0.024	0.044	0.042	0.047	0.0443333	0.044	0.023	0.02	0.029	10.5263	0.654135	1.575	1.713	1.774	Ssa01001391,Long-chain fatty alcohol oxidase involved in the omega- oxidation pathway of lipid degradation,"GMC_oxred_C,GMC_oxred_N"
Ssa08022052	1.418	0.64	2.527	1.52833	7.64	7.589	4.136	6.455	7.131	1.851	3.266	4.08267	4.437	2.23	3.26	3.309	2.626	2.179	0.799	1.868	4.22356	2.67132	0.564521	0.866	0.608	0.595	0.689667	0.127	0.226	0.401	0.251333	0.488	0.658	1.409	1.4	0.568	1.422	1.13	0.809	0.689	1.155	0.884333	0.364427	0.782596	3.146	7.619	8.852	Ssa09025693,N-terminal C2 in EEIG1 and EHBP1 proteins,NT-C2
Ssa12007079	2.398	1.789	5.403	3.19667	15.618	16.803	8.057	13.4927	5.565	3.57	6.432	5.189	5.666	4.663	9.862	6.73033	9.373	6.493	2.652	6.17267	4.22086	1.62325	0.917141	12.417	12.735	9.024	11.392	14.416	12.845	17.637	14.966	16.78	12.935	11.153	11.199	9.979	5.547	8.90833	12.449	12.326	12.385	12.3867	1.31373	1.39046	0	0.056	0	Ssa13008606,Boron transporter,HCO3_cotransp
Ssa04015062	0.401	0.562	1.792	0.918333	0.502	3.478	7.635	3.87167	4.766	1.454	2.957	3.059	0.603	1.365	3.454	1.80733	0.213	0.135	0.109	0.152333	4.21597	3.33103	0.0842862	0.305	0.675	0.64	0.54	0.211	0.204	4.66	1.69167	2.414	1.705	0.055	5.173	2.123	1.52	2.93867	0.933	1.11	1.449	1.164	3.13272	0.396098	233.305	66.686	29.809	Ssa08023320,-,-
Ssa12007805	3.248	4.368	1.196	2.93733	7.933	9.082	20.043	12.3527	0.247	18.799	16.912	11.986	0.704	8.878	15.611	8.39767	1.029	1.153	0.872	1.018	4.2054	4.08057	0.121224	5.463	2.256	3.247	3.65533	1.482	0.197	0.583	0.754	8.358	11.332	0.878	5.308	5.426	3.102	4.612	2.569	8.359	10.367	7.09833	0.206274	1.5391	78.803	38.692	36.085	Ssa03013920,-,-
Ssa01001572	0.186	0.14	0.692	0.339333	0.997	1.686	1.594	1.42567	2.375	3.369	4.332	3.35867	0.388	0.686	0.747	0.607	0.294	0.289	0.07	0.217667	4.20138	9.89784	0.358594	0.898	1.01	0.911	0.939667	12.432	8.401	33.387	18.0733	21.601	14.932	15.028	7.54	3.385	1.001	3.97533	0.257	0.167	0.288	0.237333	19.2338	0.0597015	0	1.818	0.692	Ssa12006573,RING-type zinc-finger,zf-RING_2
Ssa02012034	0	0.119	0.469	0.196	0.128	0.472	1.87	0.823333	1.677	0.358	0.722	0.919	0.167	0.349	0.206	0.240667	0.299	0.117	0.284	0.233333	4.20068	4.68878	0.969529	0.209	0.216	0.397	0.274	0.277	0.134	0.502	0.304333	0.556	0.238	0.119	0.371	0.189	0.913	0.491	0.349	0.227	0.196	0.257333	1.11071	0.5241	14.9	7.514	8.069	Ssa05017047,"Catalyzes xyloglucan endohydrolysis (XEH) and or endotransglycosylation (XET). Cleaves and religates xyloglucan polymers, an essential constituent of the primary cell wall, and thereby participates in cell wall construction of growing tissues","Glyco_hydro_16,XET_C"
Ssa07021556	0	0	0.02	0.00666667	0.041	0.02	0.023	0.028	0.037	0	0.037	0.0246667	0.08	0.016	0.063	0.053	0	0	0	0	4.2	3.7	0	0	0	0.025	0.00833333	0	0	0	0	0	0	0	0	0	0	0	0	0	0	0	0	#DIV/0!	4.482	4.318	3.544	Ssa03013808,"Ribulose-1,5 bisphosphate carboxylase oxygenase large subunit N-methyltransferase","Rubis-subs-bind,SET"
Ssa02009652	1.961	0.923	3.883	2.25567	3.267	20.127	5.01	9.468	18.438	99.747	84.256	67.4803	0.062	0.527	0.973	0.520667	8.382	2.334	1.657	4.12433	4.19743	29.9159	7.92125	0.247	0.467	0.857	0.523667	0.261	0.416	0.616	0.431	76.393	457.166	5.01	32.845	0.546	2.245	11.8787	268.6	212.026	2.332	160.986	0.823043	13.5525	0	0.148	0.169	Ssa06019764,Peptidyl-prolyl cis-trans isomerase,FKBP_C
Ssa08022410	0.063	0.071	0.161	0.0983333	0.163	0.27	0.805	0.412667	2.199	0.601	0.391	1.06367	1.638	0.909	0.447	0.998	0.357	0.466	0.212	0.345	4.19661	10.8169	0.345691	0.057	0	0	0.019	0	0.08	0	0.0266667	0	0	0.355	0	0.063	0.697	0.253333	0	0	0.058	0.0193333	1.40351	0.0763158	7.13	12.932	7.527	Ssa09024724,Nicastrin,Nicastrin
Ssa06018805	0.025	0	0.109	0.0446667	0.022	0.065	0.475	0.187333	0.282	0.162	0.454	0.299333	0	0.105	0.045	0.05	0.24	0.165	0.057	0.154	4.19403	6.70149	3.08	0.069	0	0.08	0.0496667	0	0.064	0	0.0213333	0	0.182	0.201	0.053	0.025	0.084	0.054	0.157	0.082	0.047	0.0953333	0.42953	1.76543	0.845	0.337	0.385	Ssa09024898,LOB domain-containing protein,LOB
Ssa12006614	0	0	0.059	0.0196667	0.06	0.119	0.068	0.0823333	0	0	0	0	0	0	0	0	0	0	0	0	4.18644	0	#DIV/0!	0	0	0	0	0	0	0	0	0	0.285	0	0.144	0	0	0.048	0	0.075	0	0.025	#DIV/0!	0.520833	13.904	19.621	22.077	Ssa10003729,"Mitotic checkpoint regulator, MAD2B-interacting",PRCC
Ssa01002443	0.052	0.097	0.089	0.0793333	0.285	0.268	0.443	0.332	0.468	0.441	0.444	0.451	0.177	0.346	0.462	0.328333	0.18	0.064	0.097	0.113667	4.18487	5.68487	0.346193	0.234	0.118	0.217	0.189667	0.083	0.11	0.087	0.0933333	0.438	0.16	0.235	0.323	0.225	0.23	0.259333	0.072	0.056	0.128	0.0853333	0.492091	0.329049	26.425	13.052	6.077	Ssa04014546,UPF0161 protein,Haemolytic
Ssa03014253	0.286	0.124	0.378	0.262667	0.382	0.779	2.132	1.09767	2.107	2.931	3.916	2.98467	1.602	1.095	1.454	1.38367	0.627	0.553	0.05	0.41	4.17893	11.3629	0.296314	0	0	0	0	0	0.056	0.028	0.028	0	0.045	0.025	0.069	0	0	0.023	0	0	0	0	#DIV/0!	0	3.346	8.401	3.903	Ssa01001739,Belongs to the protein kinase superfamily,Pkinase
Ssa07021509	1.819	0.943	2.224	1.662	5.747	9.182	5.905	6.94467	2.699	4.174	6.734	4.53567	2.387	9.084	20.6	10.6903	7.786	4.086	1.085	4.319	4.1785	2.72904	0.40401	0.136	0.018	0.022	0.0586667	0.026	0.027	0.027	0.0266667	0	0.552	0.073	0.111	0.064	0	0.0583333	0	0	0.02	0.00666667	0.454545	0.114286	0.42	0	0	Ssa02009691,-,-
Ssa04014720	0	0.03	0.046	0.0253333	0	0.023	0.294	0.105667	0.086	0	0.021	0.0356667	0	0	0	0	0	0	0	0	4.17105	1.40789	#DIV/0!	0	0	0	0	0	0	0	0	0.114	0.975	0.031	0	0	0	0	0.168	0.788	0.176	0.377333	#DIV/0!	#DIV/0!	69.287	57.917	58.207	Ssa07019874,-,-
Ssa06019079	1.042	1.177	1.858	1.359	5.642	8.026	3.329	5.66567	506.351	167.692	158.262	277.435	130.969	63.226	39.577	77.924	18.652	30.981	13.365	20.9993	4.169	204.146	0.269485	0.29	0.619	0.252	0.387	19.865	25.397	10.88	18.714	496.039	189.267	193.033	75.489	29.557	486.687	197.244	59.143	56.642	134.27	83.3517	48.3566	0.422581	85.873	52.094	66.66	Ssa01000857,Tubulin-folding cofactor B,"CAP_GLY,Ubiquitin_2"
Ssa09024282	0.924	1.242	0.567	0.911	3.212	3.418	4.743	3.791	1.545	5.815	6.012	4.45733	2.503	6.114	9.625	6.08067	1.128	1.926	1.338	1.464	4.16136	4.89279	0.240763	1.952	1.396	1.708	1.68533	2.687	1.456	2.323	2.15533	5.872	4.675	1.549	4.665	5.291	3.137	4.36433	3.242	4.422	4.914	4.19267	1.27888	0.960666	74.773	116.775	134.286	Ssa03013244,-,-
Ssa09024693	1.844	0.699	1.103	1.21533	2.465	6.197	6.499	5.05367	1.584	4.79	3.636	3.33667	1.846	1.59	2.752	2.06267	0.821	1	0.934	0.918333	4.15826	2.74547	0.445217	0.159	0.15	0.159	0.156	0.084	0.074	0.059	0.0723333	0.074	0.169	0.027	0.097	0.105	0.078	0.0933333	0.036	0.038	0.141	0.0716667	0.463675	0.767857	221.055	140.155	188.086	Ssa11005802,HVA22-like protein,TB2_DP1_HVA22
Ssa13008478	1.377	0.873	2.135	1.46167	4.234	7.339	6.629	6.06733	2.226	3.044	3.45	2.90667	1.281	1.684	1.89	1.61833	1.309	1.408	1.76	1.49233	4.15097	1.9886	0.922142	0.821	0.951	1.075	0.949	1.509	1.026	0.824	1.11967	0.712	0.849	0.839	0.716	0.589	0.599	0.634667	1.064	1.126	0.907	1.03233	1.17984	1.62658	0.455	0.782	0.957	Ssa02010324,Protein PLASTID MOVEMENT IMPAIRED,WEMBL
Ssa04014650	1.058	0.753	1.541	1.11733	2.119	4.21	7.576	4.635	0.624	6.032	6.43	4.362	0.995	2.926	2.732	2.21767	2.054	1.8	0.985	1.613	4.14827	3.90394	0.727341	2.957	2.407	2.148	2.504	2.562	3.045	3.875	3.16067	8.821	6.811	11.415	9.183	8.138	3.357	6.89267	3.653	2.237	2.869	2.91967	1.26225	0.42359	3.416	2.212	3.289	Ssa09024538,Cytochrome p450,p450
Ssa06019716	0	0.474	0.054	0.176	0.036	0.036	2.116	0.729333	0.1	3.733	1.032	1.62167	0.31	1.189	1.067	0.855333	5.18	1.817	6.427	4.47467	4.14394	9.21402	5.23149	0	0	0.022	0.00733333	0	0.027	0.026	0.0176667	0.311	1.406	0.024	0.044	0.231	0.047	0.107333	17.086	6.119	8.003	10.4027	2.40909	96.9193	3.463	2.715	1.741	Ssa11006064,RING-H2 finger protein,zf-RING_2
Ssa12006697	0.111	0.083	2.187	0.793667	0.481	1.848	7.518	3.28233	7.777	0.826	1.556	3.38633	0.21	0.638	1.021	0.623	0.315	0.344	0.125	0.261333	4.13566	4.26669	0.419476	0.768	0.443	0.31	0.507	0.442	0.61	0.603	0.551667	0.547	0.533	0.461	0.652	0.481	0.534	0.555667	0.191	0.558	0.481	0.41	1.0881	0.737852	27.854	9.728	14.902	Ssa01002477,"50S ribosomal protein L22, chloroplastic",Ribosomal_L22
Ssa02009721	2.926	2.842	7.841	4.53633	0.966	16.471	38.837	18.758	5.7	15.595	155.919	59.0713	3.33	3.925	9.459	5.57133	2.891	3.816	3.759	3.48867	4.13506	13.0218	0.626182	0	0	0	0	0	0	0	0	0	0.302	0	0	0	0	0	0.061	0	0.054	0.0383333	#DIV/0!	#DIV/0!	1.688	18.641	9.589	Ssa06019189,Calmodulin binding protein-like,Calmodulin_bind
Ssa01001860	0.175	1.184	5.553	2.304	3.19	5.13	20.222	9.514	4.744	92.207	96.884	64.6117	0.994	2.779	6.71	3.49433	6.972	2.116	2.56	3.88267	4.12934	28.0433	1.11113	0.475	0.45	0.55	0.491667	0.209	0.445	0	0.218	0.555	12.982	1.588	1.09	0.525	2.726	1.447	1.814	1.322	2.277	1.80433	0.44339	1.24695	15.602	13.832	13.677	Ssa07021100,Peptidyl-prolyl cis-trans isomerase,Pro_isomerase
Ssa02011563	1.488	0.64	2.527	1.55167	7.609	7.589	3.996	6.398	7.131	1.851	3.293	4.09167	4.437	2.181	3.292	3.30333	2.593	2.014	0.799	1.802	4.12331	2.63695	0.54551	0.866	0.578	0.595	0.679667	0.127	0.271	0.401	0.266333	0.488	0.658	1.409	1.4	0.568	1.382	1.11667	0.846	0.651	1.155	0.884	0.391859	0.791642	40.792	22.191	25.342	Ssa06019065,Belongs to the bacterial ribosomal protein bL31 family,Ribosomal_L31
Ssa11005853	0	0	0.017	0.00566667	0.018	0.052	0	0.0233333	0	0	0.032	0.0106667	0	0.014	0	0.00466667	0	0	0	0	4.11765	1.88235	0	0.147	0.07	0.064	0.0936667	0.073	0.026	0	0.033	1.202	3.533	1.058	0.147	0.081	0.045	0.091	2.145	1.839	0.679	1.55433	0.352313	17.0806	20.425	7.992	13.6	Ssa13008242,-,-
Ssa11005054	0.307	0.26	4.25	1.60567	1.067	6.193	12.558	6.606	6.615	2.658	4.493	4.58867	0.48	2.175	2.98	1.87833	1.676	0.965	0.908	1.183	4.11418	2.8578	0.629814	2.292	3.093	3.14	2.84167	5.374	5.614	5.787	5.59167	2.519	0.95	4.4	3.23	1.615	2.137	2.32733	1.911	1.866	2.464	2.08033	1.96774	0.89387	8.406	8.231	9.748	Ssa12007854,-,-
Ssa03013046	3.585	1.374	12.32	5.75967	7.747	21.183	42.103	23.6777	9.878	15.893	21.533	15.768	3.079	8.018	8.727	6.608	5.937	5.626	2.458	4.67367	4.11094	2.73766	0.707274	3.797	0.738	0.264	1.59967	0.678	0.454	0.87	0.667333	0.533	4.024	1.667	4.033	1.555	2.313	2.63367	0.479	0.521	0.644	0.548	0.41717	0.208075	0.423	2.969	2.62	Ssa03014006,3-ketoacyl-CoA synthase,"ACP_syn_III_C,FAE1_CUT1_RppA"
Ssa10004598	0.227	0.128	0.682	0.345667	1.182	1.174	1.906	1.42067	5.792	0.362	0.974	2.376	1.161	1.019	1.113	1.09767	1.185	0.317	0.255	0.585667	4.10993	6.87367	0.533556	0.616	0.097	0.238	0.317	2.85	3.03	6.697	4.19233	0.24	0.468	0.129	0.589	0.568	0.631	0.596	0.824	0.49	1.161	0.825	13.225	1.38423	276.6	388.194	279.85	Ssa02010648,Cold-regulated 413 plasma membrane protein,WCOR413
Ssa10003594	2.889	1.632	1.814	2.11167	5.509	8.623	11.86	8.664	6.523	7.65	9.97	8.04767	7.319	14.21	15.744	12.4243	2.951	3.386	2.275	2.87067	4.10292	3.81105	0.231052	0.928	0.866	0.945	0.913	1.804	1.285	1.386	1.49167	2.188	2.484	2.17	3.989	3.549	6.022	4.52	2.354	2.249	2.053	2.21867	1.63381	0.490855	2.606	5.589	3.414	Ssa08022297,-,-
Ssa01000409	2.369	0.734	2.053	1.71867	10.572	6.916	3.65	7.046	2.043	3.621	2.063	2.57567	1.456	0.87	0.393	0.906333	0.677	1.133	0.591	0.800333	4.09969	1.49864	0.883045	0.892	0.432	0.484	0.602667	0.477	0.427	0.211	0.371667	0.644	0.627	0.095	0.349	0.967	0.374	0.563333	0.087	0.431	0.41	0.309333	0.616704	0.549112	0.563	0.449	2.051	Ssa02011518,VQ motif,VQ
Ssa10004821	0	0.055	0.126	0.0603333	0.042	0.168	0.531	0.247	0.156	0.104	0.114	0.124667	0.056	0.135	0	0.0636667	0.371	0.136	0.165	0.224	4.09392	2.0663	3.51832	0.044	0.084	0.051	0.0596667	0	0.124	0	0.0413333	0	0.201	0	0.051	0	0	0.017	0.152	0.053	0.136	0.113667	0.692737	6.68627	3.859	7.456	6.524	Ssa01002545,Cell division cycle,"ANAPC4_WD40,WD40"
Ssa12007917	0	0	0.032	0.0106667	0.131	0	0	0.0436667	0	0	0	0	0.043	0	0	0.0143333	0	0.035	0	0.0116667	4.09375	0	0.813953	0	0	0	0	0	0	0	0	0	0	0	0	0	0	0	0	0	0	0	#DIV/0!	#DIV/0!	21.655	20.839	24.986	Ssa02012172,isoform X1,-
Ssa01000991	0	0.229	0.61	0.279667	1.323	0.701	1.405	1.143	5.185	3.569	3.407	4.05367	3.349	1.333	0.725	1.80233	0.771	0.473	0.572	0.605333	4.08701	14.4946	0.335861	0.184	0.261	0.106	0.183667	0.122	0.258	0.255	0.211667	5.052	1.361	0.576	0	0.305	1.583	0.629333	0.632	0	0.378	0.336667	1.15245	0.534958	0.154	3.384	1.792	Ssa09024025,Pentatricopeptide repeat-containing protein,"PPR,PPR_1,PPR_2,PPR_3"
Ssa05016317	8.775	0.965	50.898	20.2127	1.08	0	246.655	82.5783	0.372	566.281	414.707	327.12	1.414	0.269	0.069	0.584	97.319	7.163	39.996	48.1593	4.08547	16.1839	82.4646	0.352	0.133	0.734	0.406333	0.465	0.099	0.683	0.415667	0.74	68.354	14.465	0	0	0.346	0.115333	18.461	24.257	3.47	15.396	1.02297	133.491	7.333	7.539	9.461	Ssa12006797,Belongs to the glycosyltransferase 29 family,Glyco_transf_29
Ssa07021559	0.026	0.058	0.263	0.115667	0.089	0.242	1.085	0.472	0.571	0.408	0.578	0.519	0.116	0.282	0.387	0.261667	0.218	0.143	0.029	0.13	4.08069	4.48703	0.496815	0.092	0.022	0.027	0.047	0	0.162	0	0.054	0.162	0.448	0.116	0.027	0.102	0.199	0.109333	0.212	0.028	0.071	0.103667	1.14894	0.948171	1.287	4.79	5.666	Ssa10004256,Major Facilitator Superfamily,"MFS_1,Sugar_tr"
Ssa07020906	0.075	0	0.064	0.0463333	0.032	0.129	0.406	0.189	0.477	0.398	0.204	0.359667	0.17	0.077	0.067	0.104667	0.39	0.487	1.01	0.629	4.07914	7.76259	6.00955	0	0	0	0	0	0	0	0	0	0.231	0	0.078	0	0.042	0.04	0	0	0	0	#DIV/0!	0	10.322	10.8	13.853	Ssa01000319,Belongs to the iron ascorbate-dependent oxidoreductase family,"2OG-FeII_Oxy,DIOX_N"
Ssa11005233	9.764	10.635	14.977	11.792	58.272	57.743	28.152	48.0557	46.606	17.187	19.817	27.87	71.809	30.143	34.259	45.4037	27.907	14.569	12.213	18.2297	4.07528	2.36347	0.401502	3.716	5.662	3.66	4.346	4.337	5.565	7.251	5.71767	4.377	2.242	6.063	2.538	2.42	2.122	2.36	3.759	2.377	2.622	2.91933	1.31562	1.23701	6.864	13.986	15.202	Ssa04014683,"Protein of unknown function, DUF538",DUF538
Ssa09025855	0	0	0.04	0.0133333	0.082	0.081	0	0.0543333	0.15	0	0.074	0.0746667	0.268	0.196	0.126	0.196667	0.09	0.176	0	0.0886667	4.075	5.6	0.450847	0.043	0	0	0.0143333	0	0	0	0	0	0.146	0.054	0	0	0	0	0.147	0.102	0.044	0.0976667	0	#DIV/0!	0.119	0.063	0.288	Ssa02011390,Serine threonine-protein kinase,Pkinase
Ssa05016899	0.044	0.05	0.495	0.196333	0.154	0.975	1.271	0.8	0.814	0.567	0.848	0.743	0.176	0.322	0.692	0.396667	0.652	0.227	0.1	0.326333	4.0747	3.78438	0.822689	0.14	0.038	0.046	0.0746667	0.159	0.169	0.223	0.183667	0.798	0.594	0.478	0.576	0.777	0.37	0.574333	0.23	0.263	0.165	0.219333	2.45982	0.381892	0.572	1.132	1.022	Ssa12007084,Seed biotin-containing protein,-
Ssa07021147	3.145	2.287	5.329	3.587	11.273	23.289	9.248	14.6033	21.535	25.354	23.957	23.6153	15.153	8.581	11.313	11.6823	25.133	18.103	15.877	19.7043	4.07118	6.58359	1.68668	3.277	2.107	1.854	2.41267	1.961	1.974	3.954	2.62967	19.445	44.102	12.184	6.765	2.634	2.544	3.981	77.374	36.601	12.834	42.2697	1.08994	10.6179	4.864	9.004	5.851	Ssa02009529,Citrate-binding protein-like,Alginate_lyase2
Ssa09025996	0.04	0.318	0.276	0.211333	0.035	0	2.544	0.859667	0	0.857	0.126	0.327667	0	0.139	0.072	0.0703333	0.115	0	0.091	0.0686667	4.06782	1.55047	0.976303	0.036	0	0.042	0.026	0	0	0.051	0.017	0	0.041	0	0.042	0	0.045	0.029	0	0	0.037	0.0123333	0.653846	0.425287	2.544	4.108	2.291	Ssa02010138,glutamate carboxypeptidase,"PA,Peptidase_M28,TFR_dimer"
Ssa01000222	0.02	0.022	0.017	0.0196667	0.017	0.068	0.155	0.08	0	0	0.046	0.0153333	0.067	0.176	0.28	0.174333	0.019	0.018	0	0.0123333	4.0678	0.779661	0.0707457	0.018	0	0	0.006	0.024	0.05	0.074	0.0493333	0.146	0.101	0.045	0.041	0.02	0.066	0.0423333	0.163	0.106	0.055	0.108	8.22222	2.55118	11.765	12.1	10.968	Ssa02009440,Myb family transcription factor,"Myb_CC_LHEQLE,Myb_DNA-binding"
Ssa02010565	0.793	0.179	7.946	2.97267	1.011	4.473	30.744	12.076	16.545	4.001	7.389	9.31167	0.782	4.277	7.506	4.18833	4.57	2.709	2.323	3.20067	4.06235	3.13243	0.764186	2.058	1.179	2.718	1.985	3.418	2.691	2.791	2.96667	2.296	0.927	2.281	3.957	2.013	24.384	10.118	1.482	1.828	2.51	1.94	1.49454	0.191737	17.159	23.915	21.621	Ssa03012616,Purine nucleobase transmembrane transport,PUNUT
Ssa11005437	0.166	0.563	1	0.576333	2.023	1.818	3.18	2.34033	1.77	2.245	2.554	2.18967	0.883	0.805	0.594	0.760667	78.667	35.988	15.864	43.5063	4.06073	3.79931	57.195	0.703	1.712	0.814	1.07633	1.659	2.469	2.16	2.096	5.93	4.518	2.833	3.688	3.444	1.729	2.95367	5.983	7.008	5.52	6.17033	1.94735	2.08904	3.362	1.844	1.628	Ssa08022866,receptor-like protein kinase,"GUB_WAK_bind,Pkinase,Pkinase_Tyr"
Ssa11006306	3.291	2.9	9.022	5.071	8.562	19.771	33.292	20.5417	0.522	2.339	4.302	2.38767	0.611	0.726	1.709	1.01533	1.486	1.196	0.579	1.087	4.05081	0.470847	1.07058	5.601	7.049	13.13	8.59333	55.487	69.639	53.994	59.7067	17.285	16.931	58.957	24.755	6.948	9.7	13.801	13.423	9.284	12.863	11.8567	6.94802	0.859116	5.719	15.992	12.287	Ssa11006316,mediator of RNA polymerase II transcription subunit,Med23
Ssa04014348	0	0	0.08	0.0266667	0	0	0.324	0.108	0	0.1	0.073	0.0576667	0	0	0	0	0	0.044	0	0.0146667	4.05	2.1625	#DIV/0!	0	0	0	0	0	0	0	0	0	0	0	0	0	0	0	0	0	0	0	#DIV/0!	#DIV/0!	1.363	1.463	1.814	Ssa12006883,Mitogen-activated protein kinase kinase kinase,Pkinase
Ssa02010965	195.579	133.71	122.363	150.551	256.649	478.719	1092.5	609.29	1332.72	370.573	370.961	691.418	224.593	124.64	96.705	148.646	152.368	140.968	145.027	146.121	4.04708	4.59259	0.983013	11.325	24.27	11.085	15.56	441.947	406.726	153.092	333.922	55.974	36.074	40.881	35.737	52.487	256.157	114.794	7.565	9.579	12.422	9.85533	21.4603	0.0858526	0.418	0.25	0.286	Ssa12007785,-,RRM_1
Ssa02009568	0	0	0.043	0.0143333	0.044	0.13	0	0.058	0.24	0.107	0.117	0.154667	0.171	0.104	0.045	0.106667	0.095	0.093	0.056	0.0813333	4.04651	10.7907	0.7625	0.045	0.043	0.053	0.047	0	0	0	0	0	0	0	0	0	0	0	0	0.054	0.047	0.0336667	0	#DIV/0!	1.582	0	0	Ssa11005020,-,-
Ssa09024017	0	0	0.797	0.265667	0.269	0.712	2.244	1.075	1.976	1.869	0.644	1.49633	0.587	0.143	0.46	0.396667	0.098	0.48	0.349	0.309	4.04642	5.63237	0.778992	0	0	0	0	0	0	0	0	0.109	0.319	0	0.107	0	0	0.0356667	0	0	0	0	#DIV/0!	0	174.67	77.467	70.902	Ssa04014347,Belongs to the eukaryotic ribosomal protein eS4 family,"40S_S4_C,KOW,RS4NT,Ribosomal_S4e,S4"
Ssa10004469	0.158	0.054	0.489	0.233667	0.206	0.655	1.97	0.943667	1.186	0.775	0.741	0.900667	0.324	0.383	0.861	0.522667	0.225	0.162	0.125	0.170667	4.03852	3.85449	0.326531	0.114	0.122	0.05	0.0953333	0.019	0	0.139	0.0526667	0.251	0.31	0.144	0.312	1.172	0.123	0.535667	3.757	3.416	3.693	3.622	0.552448	6.76167	0.238	0	0.145	Ssa01000087,ammonium transporter,Ammonium_transp
Ssa07020457	0	0.083	0.19	0.091	0.448	0.508	0.146	0.367333	0.235	0	0.057	0.0973333	0.586	0.153	0	0.246333	0.21	1.439	0.415	0.688	4.03663	1.0696	2.79296	0	0	0	0	0	0	0	0	0	0	0	0	0	0	0	0	0	0	0	#DIV/0!	#DIV/0!	22.275	18.309	19.53	Ssa10003288,Peroxisomal membrane protein,PEX11
Ssa07020604	5.998	3.208	10.003	6.403	17.675	35.273	24.574	25.8407	0.507	7.534	4.528	4.18967	1.711	1.155	2.044	1.63667	3.508	4.763	1.431	3.234	4.03571	0.654329	1.97597	0.182	0.158	0.123	0.154333	0.12	0.851	0.105	0.358667	0.867	0.965	0.323	0.4	0.486	0.093	0.326333	2.463	4.045	8.896	5.13467	2.32397	15.7344	0	0	0.094	Ssa11005273,Hydrophobic seed protein,Hydrophob_seed
Ssa02009836	3.421	3.21	3.626	3.419	15.325	15.794	10.179	13.766	1.983	8.559	6.485	5.67567	1.225	2.328	3.696	2.41633	4.744	2.776	1.461	2.99367	4.02632	1.66004	1.23893	2.973	2.225	1.911	2.36967	1.586	2.388	1.353	1.77567	2.221	2.989	2.82	2.926	2.129	2.213	2.42267	4.468	3.31	5.65	4.476	0.749332	1.84755	1.238	1.015	1.037	Ssa06018663,Protein kinase PVPK-1-like,Pkinase
Ssa09025898	0	0	0.784	0.261333	0.135	0.416	2.605	1.052	1.099	0.752	1.573	1.14133	0.078	0.75	0.523	0.450333	1.014	0.192	0.116	0.440667	4.02551	4.36735	0.978534	0.156	0.03	0.018	0.068	0.062	0.044	0.043	0.0496667	0.018	0.089	0.821	0.179	0.035	0	0.0713333	1.34	2.158	2.419	1.97233	0.730392	27.6495	131.222	176.796	209.413	Ssa10004680,Reversible hydration of carbon dioxide,Pro_CA
Ssa07021059	0.027	0.124	0.259	0.136667	0.214	0.379	1.057	0.55	0.438	0.701	1.584	0.907667	0.094	0.246	0.367	0.235667	0.208	0.153	0.124	0.161667	4.02439	6.64146	0.685997	0.422	0.141	0.144	0.235667	0.066	0.14	0.172	0.126	2.526	10.436	1.339	1.054	0.577	0.153	0.594667	0.598	0.267	0.383	0.416	0.534653	0.699552	13.815	19.406	16.399	Ssa01002482,RING FYVE PHD zinc finger superfamily protein,"DUF3675,RINGv"
Ssa06019075	12.661	12.129	21.063	15.2843	56.144	68.638	59.684	61.4887	656.708	388.946	316.899	454.184	464.321	301.942	179.707	315.323	206.927	161.176	207.162	191.755	4.02299	29.7157	0.608122	0.363	0.687	0.252	0.434	7.773	9.282	12.996	10.017	211.048	58.955	34.948	40.578	28.031	131.873	66.8273	8.235	10.653	10.816	9.90133	23.0806	0.148163	29.718	44.099	44.356	Ssa05017027,Belongs to the CDP-alcohol phosphatidyltransferase class-I family,CDP-OH_P_transf
Ssa12006950	0	0	0.176	0.0586667	0	0	0.708	0.236	0	3.762	1.278	1.68	0	0.035	0	0.0116667	0.097	0.095	0	0.064	4.02273	28.6364	5.48571	0	0.088	0.054	0.0473333	0.061	0	0	0.0203333	0.054	3.166	0.058	0.16	0	0	0.0533333	0	0	0	0	0.429577	0	6.779	4.976	7.165	Ssa08022106,ZINC FINGER protein,zf-C2H2_6
Ssa08022735	1.498	1.169	0.702	1.123	3.432	5.808	4.31	4.51667	1	1.452	1.659	1.37033	0.341	1.036	1.581	0.986	0.285	0.254	0.184	0.241	4.02196	1.22024	0.244422	0.37	0.234	0	0.201333	0	0.104	0.068	0.0573333	0.087	0.871	0.031	0.028	0.027	0.182	0.079	0	0.059	0	0.0196667	0.284768	0.248945	38.153	35.058	4.924	Ssa03013940,Protein of unknown function (DUF1262),DUF1262
Ssa04014462	0.54	0.178	3.596	1.438	1.389	7.21	8.749	5.78267	5.499	2.015	4.57	4.028	0.64	1.883	3.256	1.92633	1.262	0.797	0.406	0.821667	4.02133	2.80111	0.426544	0.815	1.352	0.898	1.02167	4.312	4.24	3.792	4.11467	1.335	0.488	3.17	3.253	1.669	3.837	2.91967	1.472	0.973	2.032	1.49233	4.02741	0.511131	15.717	11.208	11.436	Ssa08023340,-,-
Ssa01001002	2.554	1.829	3.852	2.745	8.608	14.574	9.918	11.0333	4.376	3.453	5.253	4.36067	3.473	2.11	10.012	5.19833	1.183	1.044	0.632	0.953	4.01943	1.58859	0.183328	0	0	0	0	0	0.079	0	0.0263333	0.066	0.257	0	0	0	0	0	0	0	0	0	#DIV/0!	#DIV/0!	0	0.12	0	Ssa03013224,XH domain,"XH,XS,zf-XS"
Ssa04015183	0	0	0.105	0.035	0	0	0.422	0.140667	0	0.195	0.167	0.120667	0	0	0.027	0.009	0	0.028	0	0.00933333	4.01905	3.44762	1.03704	0	0.026	0.032	0.0193333	0	0.039	0.038	0.0256667	0.065	0.031	0.069	0	0.061	0.068	0.043	0.063	0.033	0.028	0.0413333	1.32759	0.96124	0	0	0	Ssa05016578,Belongs to the 'GDSL' lipolytic enzyme family,Lipase_GDSL
Ssa08023216	0.054	0.02	0.261	0.111667	0.078	0.17	1.097	0.448333	0.2	0.362	0.629	0.397	0.02	0.099	0.064	0.061	0.153	0.067	0.04	0.0866667	4.01493	3.55522	1.42077	0.097	0.077	0.188	0.120667	0.171	0.068	0.09	0.109667	0.114	0.074	0.183	0.112	0.054	0.02	0.062	0.019	0.116	0.1	0.0783333	0.90884	1.26344	6.518	10.382	8.997	Ssa02012187,Ion channel CASTOR-like,Castor_Poll_mid
Ssa08023231	0	0.019	0.058	0.0256667	0.029	0.029	0.251	0.103	0.027	0.198	0.106	0.110333	0.192	0.07	0.06	0.107333	0.064	0.047	0	0.037	4.01299	4.2987	0.34472	0.031	0.116	0.089	0.0786667	3.139	3.724	1.552	2.805	3.547	1.972	4.917	2.567	1.932	1.828	2.109	0.193	0.164	0.205	0.187333	35.6568	0.0888257	17.886	32.988	25.915	Ssa04014526,Glucose-induced degradation protein 4 homolog,Vac_ImportDeg
Ssa04014369	14.2	11.889	17.191	14.4267	63.055	63.207	47.004	57.7553	23.77	48.203	45.444	39.139	14.603	12.332	12.757	13.2307	134.695	74.269	43.891	84.285	4.00337	2.71296	6.37043	0.884	2.084	0.654	1.20733	2.014	2.907	1.879	2.26667	17.023	14.353	3.207	2.785	2.643	4.696	3.37467	3.491	2.939	2.764	3.06467	1.87742	0.908139	21.399	21.068	21.503	Ssa05016058,ZINC FINGER protein,zf-C2H2
Ssa01001491	0.12	0.019	0.34	0.159667	0.03	0.119	1.768	0.639	0.165	0.33	0.336	0.277	0.059	0.155	0.046	0.0866667	0.131	0.064	0.194	0.129667	4.00209	1.73486	1.49615	0	0	0	0	0	0	0	0	0	0.018	0	0	0	0	0	0	0	0	0	#DIV/0!	#DIV/0!	0.254	1.555	0.811	Ssa10003749,Serine threonine-protein kinase,"Pkinase,Pkinase_Tyr"
Ssa04015376	0.321	0.04	0.612	0.324333	0.248	1.354	2.291	1.29767	1.252	0.798	1.308	1.11933	0.446	0.912	1.91	1.08933	0.711	0.266	0.08	0.352333	4.00103	3.45118	0.323439	0.032	0.031	0	0.021	0	0.045	0	0.015	0	0.037	0	0	0	0	0	0	0	0	0	0.714286	#DIV/0!	275.225	509.515	538.53	Ssa09024744,THO complex subunit,"FoP_duplication,RRM_1"
Ssa10004524	0	0	0.056	0.0186667	0.056	0.168	0	0.0746667	1.243	0.83	0.355	0.809333	0.369	0.269	0.116	0.251333	0.123	0	0.146	0.0896667	4	43.3571	0.356764	0.176	0.056	0	0.0773333	0	0.165	0.082	0.0823333	0.275	0.201	0.295	0.539	0.325	0.867	0.577	0	0.07	0	0.0233333	1.06466	0.0404391	10.268	2.667	12.185	Ssa13008222,Transcription factor,Myb_DNA-binding
Ssa03012431	0.302	0.21	2.752	1.088	0.303	0.942	11.732	4.32567	4.374	6.137	5.819	5.44333	0.449	0.69	0.871	0.67	2.889	0.8	0.837	1.50867	3.9758	5.00306	2.25174	0.126	0.06	0.024	0.07	0	0	0.029	0.00966667	0.025	0.527	0.185	0.241	0.093	0.052	0.128667	0	0.025	0.13	0.0516667	0.138095	0.401554	2.763	8.296	5.897	Ssa02010628,lag1 longevity assurance homolog,TRAM_LAG1_CLN8
Ssa06018887	0	0	0.047	0.0156667	0	0.024	0.162	0.062	0.393	0.117	0.128	0.212667	0	0.057	0	0.019	0.078	0.025	0.031	0.0446667	3.95745	13.5745	2.35088	0.892	0.727	2.296	1.305	14.51	14.551	16.126	15.0623	14.024	9.482	10.965	6.455	11.486	3.108	7.01633	0.681	0.296	0.535	0.504	11.542	0.0718324	5.692	6.064	5.635	Ssa11005306,Arogenate dehydrogenase 1,"F420_oxidored,PDH"
Ssa09025398	9.451	5.1	13.651	9.40067	37.832	55.667	18.101	37.2	6.921	6.16	6.816	6.63233	6.714	5.078	9.946	7.246	26.651	11.048	3.867	13.8553	3.95717	0.705517	1.91214	0	0.052	0	0.0173333	0	0.23	0	0.0766667	0.064	0.435	0	0.125	0	0	0.0416667	0.25	0.716	0.28	0.415333	4.42308	9.968	5.819	5.159	6.775	Ssa01000978,-,-
Ssa04014580	0.252	0	0.264	0.172	0.389	0.628	1.023	0.68	0.402	2.384	1.637	1.47433	1.114	0.58	0.774	0.822667	0.133	0.234	0.032	0.133	3.95349	8.57171	0.161669	0.051	0.072	0.088	0.0703333	0	0	0.035	0.0116667	0	0.519	0.064	0.058	0.084	0.093	0.0783333	0	0	0	0	0.165877	0	15.929	5.436	4.371	Ssa01000498,Germin-like protein subfamily 1 member,Cupin_1
Ssa05015877	0.214	0.035	0.131	0.126667	0.958	0.423	0.121	0.500667	0.196	0.098	0.789	0.361	0.07	0.36	0.984	0.471333	0.814	0.513	0.724	0.683667	3.95263	2.85	1.4505	0	0	0	0	0	0	0	0	0.097	0.032	0	0.032	0.061	0.171	0.088	0.064	0.066	0.114	0.0813333	#DIV/0!	0.924242	189.049	158.533	200.187	Ssa01002038,"4,5-DOPA dioxygenase extradiol-like",LigB
Ssa05017005	0.221	0.107	0.46	0.262667	0.493	1.062	1.559	1.038	1.46	0.975	1.379	1.27133	1.435	1.483	2.394	1.77067	1.078	0.646	0.533	0.752333	3.95178	4.8401	0.424887	0.485	0.216	0.066	0.255667	0.227	0.482	0.159	0.289333	0.601	0.618	1.612	0.688	1.075	0.632	0.798333	0.262	0.511	0.675	0.482667	1.13168	0.604593	27.085	15.276	16.807	Ssa08022707,-,-
Ssa05016113	9.299	11.276	10.454	10.343	39.584	56.677	26.241	40.834	6.333	30.177	32.785	23.0983	110.194	8.794	35.174	51.3873	272.444	277.726	307.756	285.975	3.94798	2.23323	5.56509	4.458	1.994	2.153	2.86833	1.638	1.915	4.126	2.55967	7.099	4.798	22.21	29.576	19.189	30.473	26.4127	13.911	19.805	21.768	18.4947	0.892388	0.70022	6.045	14.807	10.025	Ssa05017409,"Alpha-1,3-mannosyl-glycoprotein",GNT-I
Ssa10003357	0	0	4.085	1.36167	0.016	0	16.099	5.37167	28.895	14.684	3.492	15.6903	0	0.013	0.085	0.0326667	0.054	0	0	0.018	3.94492	11.5229	0.55102	0.721	0.423	0	0.381333	0	0.024	0	0.008	0.843	2.014	0	0.02	0.038	0	0.0193333	0.098	0.041	0.194	0.111	0.020979	5.74138	0.16	1.084	0.582	Ssa02010344,-,-
Ssa11005453	63.49	55.328	68.947	62.5883	300.382	352.036	88.187	246.868	148.534	62.678	67.792	93.0013	149.873	57.824	45.694	84.4637	980.441	610.172	252.842	614.485	3.94432	1.48592	7.27514	21.417	18.493	20.069	19.993	44.798	67.79	62.107	58.2317	28.256	31.069	29.911	32.093	28.33	44.015	34.8127	34.042	39.976	40.834	38.284	2.9126	1.09971	0	0	0	Ssa09024457,Catalyzes the isomerization of citrate to isocitrate via cis-aconitate,"Aconitase,Aconitase_C"
Ssa08021938	0.222	0.042	0.032	0.0986667	0.161	0.383	0.622	0.388667	0.768	0.039	0.144	0.317	0.126	0.102	0.066	0.098	0	0	0.042	0.014	3.93919	3.21284	0.142857	0	0	0	0	0.044	0	0.186	0.0766667	0	0.038	0	0	0.037	0	0.0123333	0	0	0	0	#DIV/0!	0	146.406	71.11	92.334	Ssa01002525,ultraviolet-B receptor,RCC1
Ssa08022291	0.035	0.039	0.119	0.0643333	0.03	0.149	0.581	0.253333	0.166	0.111	0.108	0.128333	0	0.096	0.062	0.0526667	0	0.032	0	0.0106667	3.93782	1.99482	0.202532	0.094	0.03	0	0.0413333	0	0	0	0	0.037	0	0	0.036	0.104	0	0.0466667	0.036	0	0.032	0.0226667	0	0.485714	0.407	0.13	0.631	Ssa04015578,Plant protein of unknown function (DUF936),DUF936
Ssa02010811	0.156	0.132	0.184	0.157333	0.102	0.504	1.252	0.619333	0.498	0.249	0.426	0.391	0.199	0.337	0.244	0.26	0.111	0.163	0.11	0.128	3.93644	2.48517	0.492308	0.018	0.017	0.061	0.032	0.047	0.099	0.122	0.0893333	0.309	0.241	0.199	0.648	0.859	0.412	0.639667	0.627	0.484	1.124	0.745	2.79167	1.16467	67.191	38.803	40.582	Ssa09024045,Indole-3-glycerol phosphate synthase,IGPS
Ssa11005046	0.34	0	0.682	0.340667	0.788	1.664	1.57	1.34067	3.258	1.208	1.77	2.07867	2.193	1.724	1.62	1.84567	0.538	0.634	0.383	0.518333	3.93542	6.10176	0.280838	0.821	0.194	0.238	0.417667	0.136	0.577	0.855	0.522667	5.884	2.456	0.386	1.296	0.682	1.389	1.12233	0.941	0.122	0.633	0.565333	1.2514	0.503713	31.699	25.363	28.558	Ssa04015058,Peroxisomal membrane protein,PEX11
Ssa08023595	1.713	1.042	3.791	2.182	4.333	6.579	14.833	8.58167	1.438	3.16	2.366	2.32133	0.5	0.911	0.941	0.784	2.524	0.88	0.866	1.42333	3.93294	1.06386	1.81548	0.239	0	0.092	0.110333	0.131	0.112	0.11	0.117667	0.07	0.498	0.125	0.068	0.044	0.171	0.0943333	0.068	0.047	0.041	0.052	1.06647	0.551237	3.757	2.716	4.92	Ssa10004697,Belongs to the ubiquitin-conjugating enzyme family,UQ_con
Ssa01001237	0	0	0.331	0.110333	0.112	0.554	0.635	0.433667	0	0.411	0.401	0.270667	0.877	1.154	0.917	0.982667	0.366	0.239	0	0.201667	3.93051	2.45317	0.205224	0.116	0.22	0.404	0.246667	0.154	0	0	0.0513333	0.272	0.265	0	0.667	0.772	1.001	0.813333	0.133	0.416	1.076	0.541667	0.208108	0.665984	18.512	15.037	22.034	Ssa05016816,"The light-harvesting complex (LHC) functions as a light receptor, it captures and delivers excitation energy to photosystems with which it is closely associated",Chloroa_b-bind
Ssa10004168	0.245	0.185	0.632	0.354	0.71	1.199	2.263	1.39067	3.914	2.439	2.105	2.81933	1.209	1.073	1.97	1.41733	0.466	0.304	0.184	0.318	3.92844	7.96422	0.224365	0	0.07	0	0.0233333	0.196	0.312	0.411	0.306333	1.125	0.59	0.371	0.255	0.082	1.092	0.476333	0	0.088	0.076	0.0546667	13.1286	0.114766	8.422	6.394	4.992	Ssa08022656,Zeta toxin,Zeta_toxin
Ssa03013474	0	0.054	0.207	0.087	0.084	0.083	0.858	0.341667	0.231	0.206	0.301	0.246	0.165	0.133	0.258	0.185333	0.687	0.09	0.543	0.44	3.9272	2.82759	2.3741	0	0	0	0	0	0	0	0	0	0	0	0	0	0.215	0.0716667	0	0	0	0	#DIV/0!	0	0	0	0	Ssa03012501,Cytochrome P450,p450
Ssa02012039	0	0.547	0.831	0.459333	1.963	1.532	1.914	1.803	0.258	0.344	0.63	0.410667	0	1.896	0.864	0.92	0.46	0	0	0.153333	3.92525	0.894049	0.166667	1.314	1.799	0.508	1.207	3.284	1.848	1.419	2.18367	1.538	0.999	1.099	4.864	4.203	0	3.02233	0.335	0	0.3	0.211667	1.80917	0.0700342	4.446	4.593	4.22	Ssa11004996,regulation of parkin-mediated stimulation of mitophagy in response to mitochondrial depolarization,"SHR-BD,VPS13_C"
Ssa12006757	0.027	0	0.678	0.235	0.26	0.541	1.966	0.922333	0.739	0.261	0.617	0.539	0.124	0.584	0.535	0.414333	0.078	0.025	0	0.0343333	3.92482	2.29362	0.082864	0.173	0.047	0.029	0.083	0	0	0	0	0	0.056	0.464	0.028	0	0	0.00933333	0.028	0.206	0.025	0.0863333	0	9.25	0	0	0	Ssa06019685,9-cis-epoxycarotenoid dioxygenase,RPE65
Ssa11005691	0.461	0.622	0.319	0.467333	1.603	2.645	1.25	1.83267	0.332	1.601	1.521	1.15133	0.237	0.185	0.319	0.247	0.198	0.208	0.184	0.196667	3.92154	2.46362	0.796221	0.04	0.026	0.125	0.0636667	0.018	0.019	0.037	0.0246667	0.063	0.353	0.017	0.046	0.045	0.066	0.0523333	0.031	0.08	0.055	0.0553333	0.387435	1.05732	0.442	0.705	0.683	Ssa03013585,This magnesium-dependent enzyme catalyzes the hydrolysis of ATP coupled with the transport of calcium,"CaATP_NAI,Cation_ATPase,Cation_ATPase_C,Cation_ATPase_N,E1-E2_ATPase,Hydrolase"
Ssa11005063	3.193	1.414	3.281	2.62933	7.198	11.362	12.365	10.3083	5.304	7.51	7.657	6.82367	3.762	5.204	6.578	5.18133	3.857	4.754	4.376	4.329	3.92051	2.59521	0.835499	0.044	0.014	0	0.0193333	0	0	0.02	0.00666667	0.017	0.05	0.036	0.1	0.016	0.036	0.0506667	0.033	0	0	0.011	0.344828	0.217105	13.104	24.283	21.568	Ssa10004122,-,-
Ssa04014771	0.087	0	0.15	0.079	0	0.151	0.778	0.309667	0	0.279	0.409	0.229333	0	0.06	0	0.02	0	0	0	0	3.91983	2.90295	0	0	0	0	0	0	0	0	0	0.185	0	0.099	0	0.088	0.097	0.0616667	0	0	0	0	#DIV/0!	0	17.036	12.874	10.394	Ssa13008424,Telomere repeat-binding factor,"Linker_histone,Myb_DNA-bind_6,Myb_DNA-binding"
Ssa10003294	2.314	5.717	0.621	2.884	8.296	8.241	17.307	11.2813	0.231	11.1	11.519	7.61667	0.988	25.299	22.731	16.3393	0.55	0.539	0.163	0.417333	3.9117	2.64101	0.0255416	12.44	7.816	14.721	11.659	7.274	0.552	0.545	2.79033	15.78	20.592	1.478	20.148	22.321	13.695	18.7213	4.503	13.597	13.461	10.5203	0.239329	0.561944	16.811	27.095	21.445	Ssa02011372,-,-
Ssa01001260	0.152	0.057	3.225	1.14467	0.706	2.891	9.835	4.47733	2.511	0.27	1.426	1.40233	0.404	0.561	1.223	0.729333	0.53	0.378	0.343	0.417	3.91147	1.2251	0.571755	0.505	0.914	0.639	0.686	1.337	1.55	0.957	1.28133	0.645	0.419	0.749	0.475	0.102	0.565	0.380667	0.685	0.493	0.661	0.613	1.86783	1.61033	19.731	9.941	10.426	Ssa07021286,Nucleoredoxin,"C1_2,Thioredoxin_8"
Ssa02009554	9.456	1.074	105.826	38.7853	6.212	63.724	384.854	151.597	91.079	180.264	249.272	173.538	100.172	205.525	322.669	209.455	82.817	95.663	36.042	71.5073	3.90861	4.47433	0.341397	5.216	0.49	0.171	1.959	0.033	0.104	0.273	0.136667	4.836	42.534	6.357	2.345	1.525	1.15	1.67333	1.382	1.909	2.959	2.08333	0.0697635	1.24502	51.651	28.15	43.131	Ssa07020213,"Catalytic subunit of the molybdopterin synthase complex, a complex that catalyzes the conversion of precursor Z into molybdopterin. Acts by mediating the incorporation of 2 sulfur atoms from thiocarboxylated MOCS2A into precursor Z to generate a dithiolene group",MoaE
Ssa01001606	0.237	0.134	0	0.123667	0	1.332	0.117	0.483	0	2.024	0.649	0.891	0.135	4.432	0.848	1.805	0.902	2.433	6.554	3.29633	3.90566	7.20485	1.82622	5.804	0.102	1.495	2.467	0	0	0.298	0.0993333	12.071	8.083	11.593	11.23	10.469	7.273	9.65733	14.538	27.965	21.434	21.3123	0.0402648	2.20685	8.345	1.685	2.474	Ssa03012384,homeobox-leucine zipper protein,Homeobox
Ssa05016716	0.726	0.855	1.404	0.995	2.684	4.783	4.191	3.886	2.803	4.162	7.965	4.97667	4.892	3.349	2.298	3.513	1.984	1.861	1.467	1.77067	3.90553	5.00168	0.504033	4.001	1.714	0.318	2.011	0.471	0.385	0.419	0.425	1.186	7.339	2.2	1.857	2.306	1.214	1.79233	0.817	2.224	1.606	1.549	0.211338	0.864237	35.833	21.176	25.788	Ssa03013422,Alcohol dehydrogenase transcription factor Myb/SANT-like,Myb_DNA-bind_4
Ssa04014561	0.184	0.08	0.39	0.218	0.074	0.318	2.16	0.850667	1.245	0.529	0.731	0.835	0.258	0.235	0.798	0.430333	0.391	0.106	0.367	0.288	3.90214	3.83028	0.669249	0.424	0.401	0.521	0.448667	0.034	0.072	0.107	0.071	0.105	0.102	0.064	0.767	0.313	0.19	0.423333	0.059	0.092	0.106	0.0856667	0.158247	0.202362	0	0	0	Ssa08022984,ZINC FINGER protein,zf-C2H2_6
Ssa08023456	5.98	4.386	3.469	4.61167	20.016	24.375	9.564	17.985	4.651	11.963	6.307	7.64033	11.049	6.068	7.942	8.353	7.304	8.754	6.389	7.48233	3.89989	1.65674	0.895766	0.105	0	0.041	0.0486667	0	0.198	0	0.066	0.494	1.402	0	0.081	0	0	0.027	0	0	0	0	1.35616	0	6.563	16.987	14.323	Ssa07021763,Dehydration-responsive element-binding protein,AP2
Ssa04014449	0.026	0.029	0.111	0.0553333	0.09	0.2	0.357	0.215667	0.7	0.247	0.403	0.45	0.059	0.16	0.299	0.172667	0.024	0.072	0.058	0.0513333	3.89759	8.13253	0.297297	0.023	0	0	0.00766667	0	0.033	0.032	0.0216667	0.109	0.133	0.205	0	0.026	0.086	0.0373333	0	0.139	0.048	0.0623333	2.82609	1.66964	6.121	6.715	8.086	Ssa06018853,E3 ubiquitin-protein ligase,zf-RING_2
Ssa09025420	0.373	0.105	0.72	0.399333	0.729	1.448	2.489	1.55533	0.744	3.775	1.819	2.11267	2.758	2.707	2.164	2.543	1.771	1.302	0.84	1.30433	3.89482	5.29048	0.512911	0.253	0	0.196	0.149667	0.558	0.356	0.351	0.421667	1.185	3.75	0.741	3.585	1.401	5.607	3.531	0	0	0	0	2.81737	0	19.934	37.712	33.522	Ssa09025340,Transmembrane 9 superfamily member,EMP70
Ssa10004860	0.308	0.127	1.733	0.722667	0.56	1.645	6.236	2.81367	3.848	3.256	6.214	4.43933	0.702	1.531	2.678	1.637	1.81	1.279	0.158	1.08233	3.89345	6.14299	0.661169	0.584	0.192	0.059	0.278333	0.067	0.071	0.07	0.0693333	0.416	0.983	0.796	1.02	0.365	0.593	0.659333	0.407	0.363	0.417	0.395667	0.249102	0.600101	2.932	4.181	3.498	Ssa02010091,-,"DUF4378,VARLMGL"
Ssa09025120	40.658	35.253	54.636	43.5157	229.426	201.876	76.908	169.403	117.955	81.047	72.232	90.4113	124.385	41.781	55.12	73.762	179.906	122.035	101.254	134.398	3.89293	2.07767	1.82205	45.227	48.41	45.333	46.3233	75.398	85.633	75.079	78.7033	42.216	59.114	92.048	29.925	29.766	43.858	34.5163	153.914	127.279	128.172	136.455	1.699	3.95335	1.633	10.468	5.443	Ssa01002284,Belongs to the glycosyltransferase 2 family. Plant cellulose synthase subfamily,"Cellulose_synt,zf-UDP"
Ssa06019091	0.869	2.665	0.924	1.486	6.547	4.788	6.017	5.784	0.661	3.221	2.812	2.23133	0.33	2.805	3.992	2.37567	0.354	0.386	0.187	0.309	3.89233	1.50157	0.130069	0.412	0.639	0.955	0.668667	4.758	4.056	3.278	4.03067	2.368	2.221	1.034	3.356	1.825	1.844	2.34167	0.558	0.224	0.501	0.427667	6.02792	0.182633	15.042	8.56	11.589	Ssa11005428,Protein of unknown function (DUF3593),DUF3593
Ssa02011005	0	0	0.222	0.074	0	0.045	0.819	0.288	0	0.58	0.586	0.388667	0	0.036	0.046	0.0273333	0.246	0	0.058	0.101333	3.89189	5.25225	3.70732	0	0	0	0	0	0	0	0	0	0.08	0	0	0	0	0	0	0	0	0	#DIV/0!	#DIV/0!	10.507	6.904	7.603	Ssa10003735,-,-
Ssa01002499	0.252	0	0	0.084	0.109	0	0.871	0.326667	0.201	0.134	0.688	0.341	0.573	0.87	0.225	0.556	0.239	0.469	0	0.236	3.88889	4.05952	0.42446	0	0	0	0	0.151	0	0	0.0503333	0	0.389	0	0	0.126	0.14	0.0886667	0.131	0.544	0	0.225	#DIV/0!	2.53759	18.126	19.389	28.04	Ssa05016450,-,-
Ssa06018217	3.273	6.143	3.793	4.403	21.309	13.63	16.373	17.104	19.382	8.36	12.514	13.4187	2.833	6.649	5.131	4.871	1.377	1.525	1.133	1.345	3.88462	3.04762	0.276124	19.99	43.233	59.468	40.897	212.71	192.333	196.768	200.604	208.288	104.856	84.377	47.859	53.583	107.696	69.7127	10.759	11.737	17.25	13.2487	4.90509	0.190047	2.551	3.853	3.069	Ssa05015806,-,-
Ssa10002935	21.613	3.462	7.204	10.7597	51.737	31.057	42.597	41.797	3.864	32.67	16.753	17.7623	15.053	25.542	21.608	20.7343	2.912	5.109	5.635	4.552	3.8846	1.65083	0.219539	8.471	5.535	6.263	6.75633	10.624	9.033	7.908	9.18833	13.67	13.148	1.282	18.113	22.795	5.212	15.3733	1.507	1.395	2.102	1.668	1.35996	0.1085	2.923	4.924	5.623	Ssa06017924,"Domain found in a variety of signalling proteins, always encircled by uDENN and dDENN","DENN,dDENN,uDENN"
Ssa09024279	0	0	0.091	0.0303333	0.092	0	0.261	0.117667	1.097	1.522	1.404	1.341	0	0.037	0	0.0123333	0	0	0.119	0.0396667	3.87912	44.2088	3.21622	0	0	0	0	0	0	0	0	0.224	2.182	0	0	0	0	0	0.658	0.286	0	0.314667	#DIV/0!	#DIV/0!	0	0	0	Ssa03012460,CAAX protease self-immunity,Abi
Ssa01002213	0.027	0	0.046	0.0243333	0	0.07	0.213	0.0943333	0.129	0	0.021	0.05	0.061	0.074	0.072	0.069	0	0.05	0	0.0166667	3.87671	2.05479	0.241546	0.049	0.138	0.056	0.081	0	0	0.101	0.0336667	0	0.139	0.153	0.28	0.216	0.539	0.345	0.419	0.436	0.4	0.418333	0.415638	1.21256	0	0	0	Ssa04015505,Ankyrin repeat-containing protein,"Ank,Ank_2,Ank_3,Ank_4,PGG"
Ssa01001978	0.073	0	0.156	0.0763333	0.063	0.25	0.574	0.295667	0.174	0.116	0.311	0.200333	0.124	0.401	0.324	0.283	0	0.034	0.041	0.025	3.87336	2.62445	0.0883392	0.263	0.187	0.038	0.162667	0.217	0.138	0.228	0.194333	0.115	0.075	0.329	0.339	0.182	0.162	0.227667	0.075	0.157	0.236	0.156	1.19467	0.685212	49.75	44.183	60.658	Ssa02011586,Tubby-like F-box protein,"F-box,Tub"
Ssa06019217	0.252	0.355	0.324	0.310333	0.875	1.358	1.369	1.20067	3.817	6.035	4.126	4.65933	1.432	8.004	20.394	9.94333	2.391	0.703	1.843	1.64567	3.86896	15.014	0.165505	0	0	0	0	0	0.08	0	0.0266667	0.067	0.13	0	0.262	0	12.546	4.26933	0	0.068	0	0.0226667	#DIV/0!	0.00530918	1.673	1.649	1.883	Ssa01001725,E3 ubiquitin-protein ligase,zf-RING_2
Ssa08022918	0.684	0.154	0.235	0.357667	1.426	0.827	1.894	1.38233	1.092	5.54	6.941	4.52433	0.778	7.66	4.03	4.156	1.429	1.019	0	0.816	3.86486	12.6496	0.196343	0	0	0	0	0.164	0	0	0.0546667	0	0.423	0	0	0.137	0.457	0.198	0	0	0	0	#DIV/0!	0	22.042	13.031	17.69	Ssa12007238,Thioredoxin,Thioredoxin
Ssa03013788	2.262	2.493	1.849	2.20133	5.9	13.007	6.604	8.50367	82.916	62.295	26.286	57.1657	28.198	12.058	11.828	17.3613	29.882	18.815	19.277	22.658	3.86296	25.9687	1.30508	0.45	0.331	0.405	0.395333	9.45	9.482	13.944	10.9587	98.969	73.392	30.144	39.818	16.592	58.591	38.3337	42.959	41.806	18.286	34.3503	27.7201	0.896088	0	0.06	0.023	Ssa01002191,receptor-like protein kinase,"Malectin_like,Pkinase_Tyr"
Ssa05016030	0.125	0.047	2.433	0.868333	0.543	2.842	6.675	3.35333	7.584	0.799	2.798	3.727	0.237	0.749	1.525	0.837	1.583	0.388	0.845	0.938667	3.8618	4.29213	1.12147	0.302	0.679	0.525	0.502	1.247	0.689	1.309	1.08167	0.662	0.129	0.804	0.91	0.501	3.435	1.61533	0.605	0.45	0.504	0.519667	2.15471	0.321709	5.519	20.241	13.657	Ssa01000905,Pentatricopeptide repeat-containing protein,"PPR,PPR_2,PPR_3"
Ssa01001228	119.719	65.897	141.097	108.904	359.397	598.608	302.974	420.326	1873.74	987.074	1006.34	1289.05	1243.1	414.571	674.712	777.462	636	650.585	390.925	559.17	3.85959	11.8365	0.719225	0	0	0	0	0	8.652	0	2.884	1.505	39.887	0.23	0.844	3.559	0	1.46767	0.421	0	0	0.140333	#DIV/0!	0.0956166	3.655	4.228	4.051	Ssa09024039,Nudix hydrolase,NUDIX
Ssa02011042	0.234	0.231	0.729	0.398	0.56	1.617	2.431	1.536	3.691	4.211	6.603	4.835	4.529	3.5	2.326	3.45167	1.39	1.499	1.418	1.43567	3.8593	12.1482	0.415934	0	0.025	0	0.00833333	0	0.074	0.147	0.0736667	0.124	0.453	0.432	0.578	0.704	0.489	0.590333	0	0.316	0.191	0.169	8.84	0.286279	31.878	44.341	52.616	Ssa05016505,MACPF domain-containing protein,MACPF
Ssa06018002	0.145	0	1.062	0.402333	0.506	1.664	2.482	1.55067	2.961	0.465	1.363	1.59633	0.207	0.453	0.844	0.501333	0.38	0.373	0.164	0.305667	3.85418	3.96769	0.609707	0.329	0.499	0.992	0.606667	1.219	0.833	0.869	0.973667	0.693	0.263	1.115	0.34	0.255	0.972	0.522333	0.226	0.314	0.338	0.292667	1.60495	0.560306	4.383	8.524	6.418	Ssa10003034,Sodium hydrogen exchanger,Na_H_Exchanger
Ssa02011592	0.931	0.708	0.707	0.782	1.945	3.183	3.912	3.01333	0.343	2.671	2.558	1.85733	0.407	1.299	1.854	1.18667	0.442	0.417	0.282	0.380333	3.85337	2.37511	0.320506	1.134	1.244	0.676	1.018	0.343	0.342	0.382	0.355667	0.853	1.016	0.813	1.042	0.897	0.598	0.845667	0.613	0.58	0.466	0.553	0.349378	0.653922	4.758	5.062	4.561	Ssa01001024,Amino acid transporter,Aa_trans
Ssa13009252	45.678	32.751	35.784	38.071	193.104	199.438	47.036	146.526	39.648	62.885	89.498	64.0103	11.142	26.863	28.351	22.1187	595.043	321.306	134.363	350.237	3.84876	1.68134	15.8345	0.094	0.089	0	0.061	0	0.451	0	0.150333	0	11.477	0	0.022	0.021	0.046	0.0296667	0.043	0	0	0.0143333	2.46448	0.483146	17.138	26.859	37.582	Ssa02011643,Proton pump-interactor,-
Ssa02011870	0.453	0.128	0.389	0.323333	1.576	0.587	1.57	1.24433	0.362	5.075	1.505	2.314	0.387	0.157	0.202	0.248667	0.754	0.422	0.255	0.477	3.84845	7.1567	1.91823	0.616	0.389	0.238	0.414333	0	0.433	0.285	0.239333	0.48	4.678	0.257	1.532	0.341	0.758	0.877	0.471	0.857	0.317	0.548333	0.577635	0.625238	15.044	13.909	29.591	Ssa04015450,-,-
Ssa10004124	0.351	0	0.604	0.318333	0.122	0	3.546	1.22267	0	1.948	5.214	2.38733	0	0	0.314	0.104667	0.334	0.327	6.812	2.491	3.84084	7.49948	23.7994	0.127	0	0.295	0.140667	0.421	0	0	0.140333	0.149	4.714	0.798	0	0	0	0	11.746	0.38	2.813	4.97967	0.99763	#DIV/0!	93.049	33.065	35.89	Ssa02011019,N-acetyltransferase 9-like,Acetyltransf_3
Ssa10003973	0.253	0.233	0.986	0.490667	0.998	2.062	2.589	1.883	2.786	1.15	1.219	1.71833	3.867	2.223	4.88	3.65667	3.992	2.673	2.484	3.04967	3.83764	3.50204	0.834002	0.27	0.276	0.169	0.238333	0.44	0.468	0.779	0.562333	0.559	0.497	0.86	1.48	1.956	0.87	1.43533	1.192	0.794	1.667	1.21767	2.35944	0.848351	0	0	0	Ssa02010513,transcription regulatory region sequence-specific DNA binding,SRF-TF
Ssa01002049	5.517	2.128	3.352	3.66567	18.422	14.929	8.851	14.0673	187.688	32.418	23.958	81.3547	94.72	36.474	14.361	48.5183	21.029	12.097	6.672	13.266	3.83759	22.1937	0.273422	2.132	2.367	2.824	2.441	51.968	63.197	139.814	84.993	70.847	11.593	70.832	23.785	37.29	88.828	49.9677	2.584	2.4	6.952	3.97867	34.8189	0.0796248	263.449	139.438	214.513	Ssa01000090,PITH domain-containing protein,PITH
Ssa11005367	0	0	0.337	0.112333	0.015	0.062	1.216	0.431	0.142	0.836	0.278	0.418667	0	0.173	0.032	0.0683333	0.119	0.083	0.1	0.100667	3.8368	3.727	1.47317	0	0	0	0	0	0	0	0	0	0.129	0	0	0	0	0	0	0	0	0	#DIV/0!	#DIV/0!	37.262	30.134	25.464	Ssa12007368,Persulfide dioxygenase ETHE1 homolog,Lactamase_B
Ssa10004606	1.387	0.962	2.153	1.50067	3.486	7.92	5.867	5.75767	2.161	4.31	5.297	3.92267	1.788	3.004	1.626	2.13933	4.286	4.171	6.176	4.87767	3.83674	2.61395	2.27999	2.95	2.179	2.297	2.47533	1.321	1.127	0.987	1.145	2.655	6.327	0.493	0.764	0.519	0.465	0.582667	5.949	1.499	1.571	3.00633	0.462564	5.15961	9.999	5.048	6.96	Ssa01002430,Belongs to the protein kinase superfamily. Ser Thr protein kinase family,"LRRNT_2,LRR_4,LRR_8,Pkinase,Pkinase_Tyr"
Ssa11005932	0.117	0	0.97	0.362333	2.641	0.874	0.655	1.39	0.062	0.042	0.213	0.105667	0.089	0	0	0.0296667	0.148	0.254	0	0.134	3.83625	0.291628	4.51685	0.212	0.067	0	0.093	0	0	0	0	0.083	0.563	0	0.04	0	0	0.0133333	0.121	0.21	0.29	0.207	0	15.525	0.321	0.512	0.256	Ssa10004632,Plant intracellular ras-group-related LRR protein,LRR_8
Ssa09024741	0.728	0.312	0.626	0.555333	1.07	2.038	3.279	2.129	0.602	1.312	1.392	1.102	0.543	0.608	0.897	0.682667	0.573	0.491	0.311	0.458333	3.83373	1.98439	0.671387	0.296	0.172	0.079	0.182333	0.03	0.192	0.158	0.126667	0.399	0.415	0.285	0.235	0.201	0.224	0.22	0.078	0.081	0.07	0.0763333	0.694698	0.34697	11.322	12.647	11.307	Ssa02009922,metalloendopeptidase activity,-
Ssa05016310	0	0	0.198	0.066	0	0	0.759	0.253	0	2.208	0.359	0.855667	0	0	0.069	0.023	0	0	0	0	3.83333	12.9646	0	0	0	0	0	0	0	0	0	0	0	0	0	0	0.085	0.0283333	2.309	0.083	0.286	0.892667	#DIV/0!	31.5059	0	0.06	0	Ssa01001839,receptor-like protein kinase,"GUB_WAK_bind,Pkinase,Pkinase_Tyr,WAK_assoc"
Ssa01000533	12.187	5.64	14.813	10.88	38.777	55.251	31.062	41.6967	92.478	30.466	36.965	53.303	62.436	24.237	71.993	52.8887	24.592	17.841	11.994	18.1423	3.83241	4.89917	0.343029	2.142	2.536	1.965	2.21433	1.141	2.759	2.024	1.97467	0.661	3.457	0.634	1.366	2.041	1.684	1.697	0.887	1.562	1.468	1.30567	0.891766	0.769397	0.551	0.88	1.256	Ssa11005115,Belongs to the cyclin family,"Cyclin_C,Cyclin_N"
Ssa02010984	1.048	0	0	0.349333	0	0.905	3.111	1.33867	1.674	0	1.637	1.10367	0	0.725	0	0.241667	0	0.977	0	0.325667	3.83206	3.15935	1.34759	0.949	0	1.1	0.683	0	0	0	0	3.332	1.082	0	1.09	2.102	0	1.064	0	0	0	0	0	0	0.658	0.306	0.7	Ssa01000757,Belongs to the 'GDSL' lipolytic enzyme family,Lipase_GDSL
Ssa03012705	32.944	46.003	28.701	35.8827	122.74	159.864	129.535	137.38	2406.62	1129.53	716.12	1417.43	441.56	230.928	107.344	259.944	61.543	69.669	33.566	54.926	3.82858	39.5017	0.211299	5.776	5.522	4.606	5.30133	316.261	342.61	294.488	317.786	2066.53	793.086	633.618	148.155	60.879	329.055	179.363	18.891	18.404	29.632	22.309	59.9446	0.124379	40.198	27.24	26.679	Ssa06019379,Ubiquitin-like domain-containing CTD phosphatase,"NIF,ubiquitin"
Ssa05016928	3144.79	2723.89	1671.54	2513.41	13926	9892.23	5028.69	9615.65	3455.76	5293.93	4157.63	4302.44	6297.9	2752.77	3301.27	4117.31	7167.69	6070.33	6197.41	6478.48	3.82574	1.7118	1.57347	68.217	39.362	49.334	52.3043	31.487	206.064	96.606	111.386	147.411	306.117	51.336	85.695	70.071	131.279	95.6817	11.261	12.539	10.098	11.2993	2.12957	0.118093	8.474	8.559	10.131	Ssa05016453,Fasciclin-like arabinogalactan protein,Fasciclin
Ssa02010631	0	0.057	0.129	0.062	0.087	0.151	0.471	0.236333	0.2	0.214	0.411	0.275	0.143	0.763	0.851	0.585667	0.095	0.023	0.169	0.0956667	3.81183	4.43548	0.163347	0.068	0.022	0.053	0.0476667	0.03	0	0	0.01	0.133	0.155	0.142	0.104	0.075	0.084	0.0876667	0.13	0.135	0.14	0.135	0.20979	1.53992	11.997	17.407	14.308	Ssa12007447,Poly(ADP-ribose) glycohydrolase,PARG_cat
Ssa08023627	0.159	0.119	0.431	0.236333	0.115	0.913	1.673	0.900333	0.675	0.479	0.413	0.522333	0.331	0.292	0.873	0.498667	0.05	0.049	0.03	0.043	3.80959	2.21016	0.0862299	0	0	0	0	0	0	0.033	0.011	0	0	0	0.055	0.053	0	0.036	0	0	0	0	#DIV/0!	0	4.517	10.657	10.818	Ssa11005702,Methyltransferase,Methyltransf_29
Ssa13008434	0	0	0.137	0.0456667	0.083	0.028	0.41	0.173667	0	0.136	0.274	0.136667	0.036	0.022	0	0.0193333	0	0	0	0	3.80292	2.9927	0	0.144	0.082	0.033	0.0863333	0	0	0	0	0	0.131	0.036	0	0.032	0	0.0106667	0	0	0	0	0	0	0.119	0.284	0.108	Ssa05015901,RING-H2 finger protein,zf-RING_2
Ssa02010176	0.286	0.554	1.229	0.689667	2.026	1.871	3.964	2.62033	1.763	1.657	1.756	1.72533	0.838	2.036	1.497	1.457	1.865	0.648	1.659	1.39067	3.79942	2.50169	0.954473	0.518	0.491	0.172	0.393667	0.441	0.104	0.874	0.473	1.603	1.983	1.672	1.573	1.107	1.23	1.30333	1.061	0.884	0.761	0.902	1.20152	0.692072	2.696	1.599	1.953	Ssa09024824,Glycosyltransferase,Exostosin
Ssa06018281	0.038	0	0.198	0.0786667	0	0.099	0.797	0.298667	0	0.204	0.27	0.158	0.044	0	0	0.0146667	1.531	0.286	0.13	0.649	3.79661	2.00847	44.25	0	0	0	0	0	0	0	0	0	0.04	0.044	0	0	0	0	0	0	0	0	#DIV/0!	#DIV/0!	66.702	67.067	86.996	Ssa09024798,E3 ubiquitin-protein ligase,zf-RING_2
Ssa11006242	0.187	0.176	0.455	0.272667	1.705	1.183	0.216	1.03467	0.149	1.195	0.973	0.772333	0.922	0.732	0.417	0.690333	0.592	0.783	1.544	0.973	3.79462	2.83252	1.40946	1.297	1.282	0.98	1.18633	1.044	0.912	1.331	1.09567	3.827	6.266	1.238	1.133	1.124	2.047	1.43467	4.558	2.154	1.478	2.73	0.923574	1.90288	5.364	4.543	3.682	Ssa10003141,Heat shock 70 kDa protein,HSP70
Ssa01000280	1.788	1.868	3.014	2.22333	5.847	8.934	10.521	8.434	13.667	13.102	13.315	13.3613	11.013	13.505	15.707	13.4083	11.804	13.677	14.279	13.2533	3.7934	6.0096	0.98844	6.981	8.896	8.912	8.263	13.488	13.653	24.47	17.2037	48.508	27.116	41.775	44.798	55.635	41.63	47.3543	37.347	36.783	46.845	40.325	2.08201	0.851559	0	0	0	Ssa10003829,-,-
Ssa10004073	0	0	0.024	0.008	0.012	0.024	0.055	0.0303333	0	0.015	0.043	0.0193333	0.016	0	0	0.00533333	0.026	0	0	0.00866667	3.79167	2.41667	1.625	0.162	0.249	0.507	0.306	0.149	0.053	0.069	0.0903333	0.058	0.057	0.125	0.086	0.055	0	0.047	0.057	0.06	0.077	0.0646667	0.295207	1.37589	0	0	0	Ssa05016249,Belongs to the iron ascorbate-dependent oxidoreductase family,"2OG-FeII_Oxy,DIOX_N"
Ssa09024093	0.422	0.556	0.483	0.487	3.299	0.85	1.39	1.84633	0.168	0.937	0.521	0.542	0	0.049	0.22	0.0896667	0.467	0.295	0.158	0.306667	3.79124	1.11294	3.42007	1.114	1.688	1.844	1.54867	49.914	47.235	26.73	41.293	82.502	84.127	38.156	2.302	6.375	3.681	4.11933	3.101	1.595	3.206	2.634	26.6636	0.639424	8.913	9.713	6.602	Ssa03012463,PI-PLC X domain-containing protein,-
Ssa02010064	7.617	5.509	5.079	6.06833	25.643	25.565	17.759	22.989	3.308	11.779	12.117	9.068	4.224	5.581	7.208	5.671	10.231	6.815	5.91	7.652	3.78835	1.49431	1.34932	3.986	2.944	1.585	2.83833	1.06	0.906	2.089	1.35167	3.521	9.686	2.279	2.378	2.293	1.635	2.102	2.531	1.726	3.294	2.517	0.476218	1.19743	8.972	6.726	6.309	Ssa08023514,f-box protein,"Sel1,zf-MYND"
Ssa01000743	0.977	0.883	7.719	3.193	0.985	2.766	32.502	12.0843	9.296	13.079	7.872	10.0823	0.4	0.567	1.396	0.787667	6.013	1.056	1.497	2.85533	3.78463	3.15764	3.62505	0	0	0.041	0.0136667	0	0	0	0	0	1.008	0.089	0	0	0	0	0.041	0	0	0.0136667	0	#DIV/0!	1.746	2.305	1.837	Ssa12007055,Belongs to the protein kinase superfamily. Ser Thr protein kinase family,"LRRNT_2,LRR_1,LRR_6,LRR_8,Pkinase"
Ssa12007406	0.329	0.558	1.696	0.861	0.731	0.158	8.881	3.25667	0.73	6.414	2.471	3.205	0.708	2.162	1.878	1.58267	0.938	0.647	2.184	1.25633	3.78242	3.72242	0.793808	0	0.016	0	0.00533333	0.022	0.023	0	0.015	0	0.019	0	0	0	0	0	0.019	0.02	0	0.013	2.8125	#DIV/0!	38.823	92.846	62.495	Ssa12006537,transcription factor,HLH
Ssa03012528	4.359	3.456	39.548	15.7877	59.235	65.311	54.429	59.6583	27.601	17.978	21.232	22.2703	6.746	2.063	2.664	3.82433	71.934	25.329	20.082	39.115	3.77879	1.41062	10.2279	7.653	9.744	7.785	8.394	5.083	6.084	8.942	6.703	21.147	29.436	14.419	5.368	5.059	3.877	4.768	184.344	123.286	147.62	151.75	0.798547	31.8268	3.51	3.28	4.797	Ssa12007575,VID27 cytoplasmic protein,VID27
Ssa05017032	0.049	0.056	7.374	2.493	0.515	8.158	19.569	9.414	23.99	5.759	9.652	13.1337	2.387	8.819	19.674	10.2933	0.023	0.115	0.028	0.0553333	3.77617	5.26822	0.00537565	0.938	0.233	0.026	0.399	0.148	0.345	0.031	0.174667	0.314	2.138	3.95	0.128	0.148	0	0.092	0.051	0.293	0.092	0.145333	0.437761	1.57971	9.807	3.419	3.529	Ssa03013708,Acyl-protein thioesterase,Abhydrolase_2
Ssa08022026	0.931	0.708	0.738	0.792333	1.929	3.168	3.877	2.99133	0.343	2.671	2.558	1.85733	0.407	1.287	1.822	1.172	0.408	0.417	0.282	0.369	3.77535	2.34413	0.314846	1.134	1.244	0.676	1.018	0.343	0.342	0.382	0.355667	0.948	1.053	0.813	1.042	0.879	0.598	0.839667	0.576	0.58	0.483	0.546333	0.349378	0.650655	0.826	0.659	2.407	Ssa09025672,Belongs to the major facilitator superfamily. Sugar transporter (TC 2.A.1.1) family,Sugar_tr
Ssa02009916	0.121	0.068	0.572	0.253667	0.158	0.261	2.453	0.957333	0.483	2.257	1.748	1.496	0.138	0.167	0.054	0.119667	0.862	0.113	0.204	0.393	3.77398	5.8975	3.28412	0.164	0.052	0	0.072	0	0.077	0	0.0256667	0.32	0.25	0.481	0	0.242	0.202	0.148	0	0	0.225	0.075	0.356481	0.506757	33.901	38.381	33.71	Ssa06017459,Belongs to the glycosyltransferase 8 family,Glyco_transf_8
Ssa06019690	0	0	0.432	0.144	0.097	0.869	0.664	0.543333	8.483	1.133	2.358	3.99133	0.064	0	0	0.0213333	0	0	0	0	3.77315	27.7176	0	0	0	0	0	0	0	0	0	0	0	0	0	0	0	0	0	0	0	0	#DIV/0!	#DIV/0!	4.828	1.586	3.142	Ssa12006897,Belongs to the multi antimicrobial extrusion (MATE) (TC 2.A.66.1) family,MatE
Ssa11006175	0.762	0.108	0.573	0.481	0.911	0	4.525	1.812	1.522	4.166	1.861	2.51633	4.448	2.439	0.596	2.49433	8.331	4.972	25.671	12.9913	3.76715	5.23146	5.20834	1.295	0.572	0.1	0.655667	0.457	0.243	0.24	0.313333	4.847	5.016	5.954	0.396	1.528	6.584	2.836	5.639	7.314	7.187	6.71333	0.477885	2.36718	0.286	0.82	0.208	Ssa08023067,purine permease,PUNUT
Ssa01002765	2.08	1.485	2.973	2.17933	4.398	6.322	13.909	8.20967	5.846	9.722	11.241	8.93633	3.144	5.19	7.372	5.23533	3.036	2.992	2.419	2.81567	3.76705	4.10049	0.53782	2.306	1.613	2.148	2.02233	4.285	4.236	3.347	3.956	5.412	3.623	5.122	3.409	4.554	3.375	3.77933	3.628	3.651	4.214	3.831	1.95616	1.01367	1.167	0.532	0.912	Ssa04015249,-,-
Ssa13008840	0	0.054	0.207	0.087	0.042	0.083	0.858	0.327667	0.231	0.154	0.301	0.228667	0.165	0.133	0.258	0.185333	0.687	0.09	0.543	0.44	3.76628	2.62835	2.3741	0	0	0	0	0	0	0	0	0	0	0	0	0	0.215	0.0716667	0	0	0	0	#DIV/0!	0	5.101	2.673	3.816	Ssa08022315,Aminoacyl tRNA synthase complex-interacting multifunctional protein,tRNA_bind
Ssa07020929	0.071	0	1.557	0.542667	0.185	2.148	3.797	2.04333	1.873	2.197	3.164	2.41133	0	0.614	0.603	0.405667	0.338	0.132	0.12	0.196667	3.76536	4.44349	0.484799	0.29	0.366	0.336	0.330667	0.596	0.362	0.894	0.617333	1.054	2.017	0.283	0.554	0.249	1.069	0.624	0.295	0.461	0.265	0.340333	1.86694	0.545406	10.553	4.32	5.769	Ssa02011640,VQ motif,VQ
Ssa01000665	0.061	0	0.47	0.177	0.053	0.262	1.683	0.666	1.262	0.842	0.997	1.03367	0.277	0.168	0.489	0.311333	0.231	0.17	0.753	0.384667	3.76271	5.83992	1.23555	0	0	0	0	0	0	0	0	0	0.063	0	0	0	0	0	0	0	0	0	#DIV/0!	#DIV/0!	3.442	5.011	4.897	Ssa06018416,Protein kinase superfamily protein,-
Ssa08023447	0.732	1.278	0.743	0.917667	1.562	6.093	2.7	3.45167	22.004	75.575	69.398	55.659	5.758	14.223	8.026	9.33567	7.21	4.093	2.025	4.44267	3.76135	60.6527	0.475881	1.567	0.628	0.908	1.03433	0.08	0.169	0.586	0.278333	47.672	88.055	3.553	18.411	5.071	9.568	11.0167	11.47	9.137	1.487	7.36467	0.269094	0.668502	445.57	527.427	520.492	Ssa03012915,WRKY transcription factor,WRKY
Ssa13008867	0.145	0.021	0.14	0.102	0	0	1.149	0.383	0	4.742	5.373	3.37167	0.021	0.05	0	0.0236667	0.069	0.017	0.041	0.0423333	3.7549	33.0556	1.78873	0	0	0	0	0	0	0	0	0	0.805	0.021	0	0	0	0	0	0	0	0	#DIV/0!	#DIV/0!	19.6	9.915	12.887	Ssa01000156,-,-
Ssa03012577	0.081	0	0	0.027	0.035	0.07	0.199	0.101333	0.064	0.043	0.094	0.067	0	0.056	0.108	0.0546667	0.153	0.038	0	0.0636667	3.75309	2.48148	1.16463	1.314	1.072	1.1	1.162	4.974	4.517	3.65	4.38033	2.093	1.997	0.962	1.803	0.808	1.393	1.33467	0.544	0.479	0.225	0.416	3.76965	0.311688	27.498	20.878	29.222	Ssa04015453,Belongs to the nucleosome assembly protein (NAP) family,NAP
Ssa07020712	0.035	0.08	0.183	0.0993333	0	0.031	1.087	0.372667	0.226	0	0	0.0753333	0.161	0.074	0.095	0.11	0.236	0.033	0.2	0.156333	3.75168	0.758389	1.42121	6.9	13.804	9.447	10.0503	24.446	29.997	17.198	23.8803	11.601	8.264	14.369	7.554	5.044	5.725	6.10767	15.561	8.427	7.951	10.6463	2.37607	1.74311	11.563	11.231	13.055	Ssa08021974,Xylosyltransferase 2-like,Branch
Ssa07021233	0.053	0.05	0.43	0.177667	0.107	0.865	1.026	0.666	0.281	0.525	0.742	0.516	0.08	0.383	0.691	0.384667	0.109	0.131	0.059	0.0996667	3.74859	2.90432	0.259099	0.072	0.06	0.055	0.0623333	0.653	0.515	0.243	0.470333	0.261	0.181	0.12	0.676	0.652	0.774	0.700667	0.319	0.399	0.368	0.362	7.54545	0.516651	7.661	3.668	4.388	Ssa07020108,-,-
Ssa09024820	81.141	196.647	42.428	106.739	414.589	371.107	411.985	399.227	157.958	336.207	269.811	254.659	35.43	69.652	77.545	60.8757	140.757	148.324	102.623	130.568	3.74023	2.38581	2.14483	20.024	23.671	20.442	21.379	405.192	396.65	263.885	355.242	233.699	184.701	172.901	77.576	67.425	44.787	63.2627	47.734	75.554	90.877	71.3883	16.6164	1.12844	19.83	25.858	16.315	Ssa01000444,Homeobox-leucine zipper protein,"HALZ,Homeobox"
Ssa04015484	0.293	0.991	2.199	1.161	1.717	0.884	10.418	4.33967	0.117	44.368	37.129	27.2047	0.083	1.214	0.849	0.715333	0.278	0.341	0.495	0.371333	3.73787	23.4321	0.519105	61.134	24.725	50.664	45.5077	5.431	2.048	2.667	3.382	29.989	136.684	10.135	7.529	17.228	4.401	9.71933	27.714	22.768	31.662	27.3813	0.0743171	2.8172	0	0	0	Ssa12007754,Belongs to the iron ascorbate-dependent oxidoreductase family,"2OG-FeII_Oxy,DIOX_N"
Ssa09024808	14.425	8.93	15.688	13.0143	34.382	55.196	56.35	48.6427	9.935	42.666	39.971	30.8573	5.321	10.459	17.775	11.185	11.365	10.877	6.74	9.66067	3.73762	2.37103	0.863716	12.7	8.13	6.193	9.00767	3.472	2.931	3.789	3.39733	6.264	28.162	8.211	9.245	5.317	5.847	6.803	7.362	3.765	3.242	4.78967	0.37716	0.704052	4.508	5.34	5.908	Ssa01000093,Serine threonine-protein kinase,Pkinase
Ssa03012704	0.163	0.123	0.561	0.282333	0.284	0.564	2.316	1.05467	1.131	1.771	2.531	1.811	0.062	0.32	0.389	0.257	0.31	0.33	0.276	0.305333	3.73554	6.4144	1.18807	0	0.047	0.029	0.0253333	0.065	0.243	0.137	0.148333	1.356	17.028	0.34	0.538	0.109	6.614	2.42033	0.028	0.059	0.076	0.0543333	5.85526	0.0224487	29.278	17.457	11.331	Ssa01001599,RING finger and CHY zinc finger domain-containing protein,"zf-C3HC4_2,zf-CHY,zf-RING_2,zf-RING_UBOX,zinc_ribbon_6"
Ssa01001122	0.166	0.187	0.853	0.402	0.432	1.286	2.784	1.50067	1.322	1.235	1.293	1.28333	0.188	0.458	0.591	0.412333	4.089	0.154	0.187	1.47667	3.733	3.19237	3.58124	0	0	0	0	0	0.632	0	0.210667	0	0	0.188	0	0	0	0	0	0	0.308	0.102667	#DIV/0!	#DIV/0!	0	1.677	0	Ssa02010510,-,-
Ssa08022995	1.355	1.603	1.219	1.39233	6.506	5.571	3.51	5.19567	1.545	3.233	2.469	2.41567	3.158	3.123	3.688	3.323	2.391	2.164	1.89	2.14833	3.73163	1.73498	0.646504	0.292	0.664	0.339	0.431667	0.541	0.575	0.568	0.561333	1.845	1.398	0	1.208	0.517	0.072	0.599	0.536	0.837	0.601	0.658	1.30039	1.0985	8.014	2.842	2.758	Ssa01002433,-,-
Ssa06019327	0.393	0.444	0.338	0.391667	1.367	0.679	2.333	1.45967	1.883	0.838	1.228	1.31633	1.342	0.816	1.053	1.07033	0	1.465	0.886	0.783667	3.72681	3.36085	0.732171	0.712	0	0.413	0.375	0.471	0	0.494	0.321667	0.833	0	0	0.409	0.788	0	0.399	0	0	0	0	0.857778	0	2.662	4.666	5.198	Ssa02010398,protein trichome birefringence-like 19,"PC-Esterase,PMR5N"
Ssa11006284	0.498	0	0.428	0.308667	0.217	0.645	2.587	1.14967	0	0.266	0.389	0.218333	0.425	0.258	0.445	0.376	0	0	0	0	3.72462	0.707343	0	1.354	1.389	1.699	1.48067	1.939	0.634	2.662	1.745	0.528	1.542	0.849	2.59	5.244	1.249	3.02767	0.647	0.404	0.928	0.659667	1.17852	0.21788	37.006	47.094	43.352	Ssa11005566,Belongs to the class-I aminoacyl-tRNA synthetase family,"tRNA-synt_1c,tRNA-synt_1c_C,tRNA_synt_1c_R1,tRNA_synt_1c_R2"
Ssa13009382	0.043	0	0.425	0.156	0	0.297	1.446	0.581	0.378	0.069	0.134	0.193667	0	0.164	0.154	0.106	0.061	0.04	0.073	0.058	3.72436	1.24145	0.54717	0	0	0	0	0	0	0	0	0	0	0.049	0.201	0.043	0.048	0.0973333	0.045	0.046	0.04	0.0436667	#DIV/0!	0.44863	5.144	9.401	10.054	Ssa01001274,IQ-DOMAIN 1-like,"DUF4005,IQ"
Ssa07021829	0.026	0.06	0.683	0.256333	0.023	0.114	2.725	0.954	0.127	1.045	0.993	0.721667	0	0.073	0.071	0.048	0.403	0.173	0.179	0.251667	3.72172	2.81534	5.24306	0.192	0.068	0.139	0.133	0.063	0.202	0	0.0883333	0.337	0.301	0.18	0.055	0.159	0.148	0.120667	0.082	0.029	0.197	0.102667	0.66416	0.850829	0.256	0.204	1.588	Ssa11006105,Phosphoribulokinase,PRK
Ssa09025436	5.107	3.94	5.082	4.70967	19.193	16.375	17.003	17.5237	13.327	15.57	17.583	15.4933	15.418	21.814	22.917	20.0497	8.166	9.632	9.861	9.21967	3.72079	3.28969	0.459841	17.483	27.251	49.512	31.4153	82.867	82.405	73.76	79.6773	50.015	38.174	14.855	34.485	41.512	23.767	33.2547	18.167	17.569	23.249	19.6617	2.53626	0.591245	2.226	1.28	1.509	Ssa05016911,-,-
Ssa06019214	0.059	0	0.051	0.0366667	0	0	0.409	0.136333	0	0.063	0	0.021	0	0.041	0.053	0.0313333	0	0	0	0	3.71818	0.572727	0	0	0	0	0	0	0	0	0	0	0.061	0	0	0	0	0	0	0	0	0	#DIV/0!	#DIV/0!	1.931	2.533	2.923	Ssa13008959,DEAD-box ATP-dependent RNA helicase,"DEAD,Helicase_C"
Ssa13009411	0.06	0.068	0.232	0.12	0.131	0.078	1.129	0.446	0.24	0.32	0.117	0.225667	0.137	0.083	0.08	0.1	0.143	0.14	0	0.0943333	3.71667	1.88056	0.943333	0	0	0	0	0	0	0	0	0	0.031	0	0.062	0.03	0	0.0306667	0.031	0	0	0.0103333	#DIV/0!	0.336957	199.51	170.395	201.328	Ssa03014067,Sarcoplasmic reticulum histidine-rich calcium-binding protein,-
Ssa12006741	0.027	0	0.862	0.296333	0.306	0.866	2.119	1.097	0.823	0.202	0.529	0.518	0	0.225	0.218	0.147667	0.386	0.101	0.122	0.203	3.70191	1.74803	1.37472	0.295	0.302	0.085	0.227333	0.227	0.518	0.545	0.43	0.259	0.112	0.277	0.367	0.19	0.121	0.226	0.507	0.322	0.328	0.385667	1.8915	1.70649	68.524	53.763	90.637	Ssa04015788,Thioesterase superfamily,4HBT
Ssa02011226	0.157	0.089	0.135	0.127	0.273	0.204	0.933	0.47	0.314	0.168	0.338	0.273333	0.224	0.299	0.492	0.338333	0.075	0.33	0.354	0.253	3.70079	2.15223	0.747783	0.142	0.034	0.083	0.0863333	0.094	0	0.099	0.0643333	0.083	0.243	0.045	0	0.039	0.219	0.086	0.041	0	0.037	0.026	0.745174	0.302326	50.077	55.821	68.259	Ssa02012056,Protein disulfide isomerase-like,"Thioredoxin,Thioredoxin_6"
Ssa03013446	0.145	0.021	0.14	0.102	0	0	1.131	0.377	0	4.742	5.345	3.36233	0.021	0.05	0	0.0236667	0.069	0.017	0.041	0.0423333	3.69608	32.9641	1.78873	0	0	0	0	0	0	0	0	0	0.805	0.021	0	0	0	0	0	0	0	0	#DIV/0!	#DIV/0!	154.558	152.711	154.713	Ssa06019104,PDDEXK-like family of unknown function,PDDEXK_6
Ssa07021308	0.112	0	0.128	0.08	0.032	0.45	0.405	0.295667	1.308	0.595	0.436	0.779667	0.381	1.261	0.598	0.746667	0.141	0.104	0.042	0.0956667	3.69583	9.74583	0.128125	0.034	0.032	0	0.022	0.223	0.663	0.421	0.435667	0.71	8.334	7.229	0.077	0.112	0.373	0.187333	0.039	0.08	0	0.0396667	19.803	0.211744	0	0.078	0.089	Ssa08023441,Protein LATERAL ORGAN,LOB
Ssa06019066	3.455	1.451	5.023	3.30967	10.782	15.3	10.604	12.2287	11.035	13.459	14.322	12.9387	9.428	8.516	8.664	8.86933	7.66	5.778	6.69	6.70933	3.69483	3.90936	0.756464	4.011	3.763	3.394	3.72267	1.22	1.635	1.949	1.60133	6.242	7.314	4.578	4.146	4.618	6.91	5.22467	3.955	3.687	7.093	4.91167	0.430158	0.940092	2.663	1.971	1.929	Ssa12006832,-,-
Ssa10003742	0.223	0	0.861	0.361333	0.194	1.057	2.753	1.33467	1.245	0.237	0.261	0.581	0	0.231	0.497	0.242667	0	0	0.125	0.0416667	3.69373	1.60793	0.171703	0	0.096	0	0.032	0.533	0.142	0.42	0.365	0.354	0.345	1.77	0.695	0	0	0.231667	0.925	0.602	0.829	0.785333	11.4062	3.38993	0	0	0	Ssa05016788,Belongs to the 14-3-3 family,2014/3/3
Ssa06018082	0.768	0.565	7.424	2.919	22.83	8.183	1.32	10.7777	0.373	1.138	0.938	0.816333	1.139	0.277	0.864	0.76	24.286	3.389	1.58	9.75167	3.69225	0.279662	12.8311	0	0.029	0	0.00966667	0	0.042	0	0.014	0.035	0.138	0.076	0.069	0	0	0.023	0.035	0.036	0	0.0236667	1.44828	1.02899	0	0	0.023	Ssa07020210,beta-galactosidase,"BetaGal_dom4_5,Gal_Lectin,Glyco_hydro_35"
Ssa06019115	0.154	0.116	1.015	0.428333	1.116	1.596	2.032	1.58133	1.23	2.08	2.326	1.87867	0.818	0.852	0.826	0.832	0.585	0.526	0.637	0.582667	3.69183	4.38599	0.700321	0.093	0.088	0.054	0.0783333	0.123	0.196	0.194	0.171	0.653	1.537	1.866	0.534	0.515	0.343	0.464	0.48	0.277	0.526	0.427667	2.18298	0.921695	3.123	1.111	2.153	Ssa07021760,-,-
Ssa05016544	1.331	1.381	7.819	3.51033	2.527	13.303	23.034	12.9547	52.634	1.333	6.217	20.0613	0.588	1.146	4.951	2.22833	0.929	0.633	0.888	0.816667	3.69044	5.71494	0.366492	3.1	4.173	8.869	5.38067	15.88	20.925	67.162	34.6557	9.298	8.86	64.16	35.374	25.819	6.812	22.6683	2.539	4.523	2.378	3.14667	6.44078	0.138813	337.78	117.106	116.298	Ssa09025343,Chorismate mutase,-
Ssa09025859	0.139	0	0.719	0.286	0.194	0.626	2.345	1.055	0.757	1.279	0.828	0.954667	0.127	0.386	0.548	0.353667	0.318	0.182	0.503	0.334333	3.68881	3.338	0.945335	0.379	0.144	0.205	0.242667	0.234	0.036	0.14	0.136667	0.236	0.173	0.222	0.261	0.084	0.124	0.156333	0.058	0.121	0.13	0.103	0.563187	0.658849	2.587	4.898	3.584	Ssa06018850,Cell morphogenesis N-terminal,"MOR2-PAG1_C,MOR2-PAG1_N,MOR2-PAG1_mid"
Ssa10004523	0.253	0.204	1.273	0.576667	2.985	0.999	2.396	2.12667	23.9	6.051	5.223	11.7247	18.475	20.999	5.876	15.1167	1.58	1.212	3.463	2.085	3.68786	20.3318	0.137927	1.048	3.35	0.986	1.79467	6.234	8.605	6.999	7.27933	16.278	2.76	32.683	48.229	96.494	159.712	101.478	1.126	0.938	1.413	1.159	4.05609	0.0114212	0	0.19	0.174	Ssa01001641,Pectate lyase,"Pec_lyase_C,Pec_lyase_N"
Ssa01000347	14.769	3.04	13.982	10.597	42.336	39.813	35.039	39.0627	1.398	2.99	4.153	2.847	1.144	0.415	0.348	0.635667	10.674	8.443	3.855	7.65733	3.6862	0.268661	12.0461	1.072	1.127	0.766	0.988333	0.214	0.351	0.428	0.331	1.116	0.82	1.823	0.303	0.26	0	0.187667	0.438	0.561	0.845	0.614667	0.334907	3.27531	1.254	7.486	5.24	Ssa13008667,Amino acid transporter,Aa_trans
Ssa13009224	0.015	0.018	0.16	0.0643333	0.027	0.04	0.644	0.237	0.099	0.248	0.266	0.204333	0	0.118	0.014	0.044	0.236	0.029	0.052	0.105667	3.68394	3.17617	2.40152	0.098	0.04	0.081	0.073	0.056	0	0.019	0.025	0.148	0.208	0.018	0.016	0.031	0.052	0.033	0.048	0.017	0.072	0.0456667	0.342466	1.38384	159.036	83.833	51.437	Ssa06019012,Heavy metal-associated isoprenylated plant protein,HMA
Ssa11005431	17.206	12.121	18.753	16.0267	82.504	68.693	25.803	59	33.385	28.402	32.509	31.432	35.587	27.507	26.603	29.899	94.04	87.559	39.198	73.599	3.68136	1.96123	2.46159	9.549	8.254	4.077	7.29333	10.192	14.6	20.004	14.932	16.465	14.127	29.418	23.47	15.948	17.11	18.8427	9.987	10.798	12.917	11.234	2.04735	0.5962	8.187	5.988	6.217	Ssa12006592,Dof zinc finger protein,zf-Dof
Ssa05017349	0.481	0.045	15.005	5.177	4.179	21.207	31.744	19.0433	57.967	10.08	21.214	29.7537	4.515	16.097	30.058	16.89	0.685	1.194	0.045	0.641333	3.67845	5.74728	0.0379712	0.327	0.241	0.084	0.217333	0.432	1.122	0.403	0.652333	1.273	2.687	2.457	2	0.763	0.312	1.025	0.957	0.736	1.38	1.02433	3.00153	0.99935	0.027	0.692	0.58	Ssa13009201,regulation of actin nucleation,-
Ssa10004875	0	0	0.105	0.035	0.212	0.053	0.121	0.128667	0.098	0	0.048	0.0486667	0.07	0	0.109	0.0596667	0.174	0	0.138	0.104	3.67619	1.39048	1.74302	0	0	0.064	0.0213333	0.073	0	0	0.0243333	0.129	0.378	0	0	0	0	0	0	0	0	0	1.14062	#DIV/0!	0.042	0.234	0.497	Ssa07020868,Belongs to the cytochrome P450 family,p450
Ssa12007293	0.03	0.034	0.335	0.133	0.078	0.467	0.921	0.488667	0.384	0.032	0.234	0.216667	0.034	0.166	0.08	0.0933333	0.029	0.028	0	0.019	3.67419	1.62907	0.203571	0.109	0.155	0.221	0.161667	0.324	0.153	0.34	0.272333	0.191	0.093	0.273	0.312	0.09	0.201	0.201	0.031	0.032	0.168	0.077	1.68454	0.383085	2.838	6.2	8.235	Ssa01000511,-,-
Ssa07020449	0.817	0.559	0.406	0.594	2.206	2.34	2	2.182	0.618	3.026	2.066	1.90333	1.42	1.666	2.017	1.701	0.511	0.841	0.412	0.588	3.6734	3.20426	0.345679	5.589	9.576	10.517	8.56067	12.182	7.61	9.22	9.67067	10.23	8.366	4.177	9.615	8.644	1.941	6.73333	1.741	0.86	1.281	1.294	1.12966	0.192178	113.694	50.011	48.33	Ssa12007061,Prohibitin-1,Band_7
Ssa06017679	0.268	0.529	1.811	0.869333	2.24	5.316	2.019	3.19167	1.122	0.357	0.836	0.771667	0.685	0.301	1.076	0.687333	1.844	0.655	0.452	0.983667	3.6714	0.887653	1.43113	0	0	0	0	0.04	0.043	0	0.0276667	0	0.173	0.076	0	0.034	0.037	0.0236667	0.035	0	0	0.0116667	#DIV/0!	0.492958	20.412	29.172	47.297	Ssa03013554,fasciclin-like arabinogalactan protein,Fasciclin
Ssa09025027	0.104	0.059	0	0.0543333	0.045	0.09	0.463	0.199333	0.083	0.499	0.244	0.275333	0.118	0.611	0.046	0.258333	1.037	1.211	1.64	1.296	3.66871	5.06748	5.01677	0.753	0.58	0.928	0.753667	1.245	2.581	0.458	1.428	1.928	1.448	0.177	0.919	0.886	0.405	0.736667	4.101	2.416	3.436	3.31767	1.89474	4.50362	0	0	0	Ssa06019654,E3 ubiquitin-protein ligase that mediates ubiquitination and subsequent proteasomal degradation of target proteins. E3 ubiquitin ligases accept ubiquitin from an E2 ubiquitin- conjugating enzyme in the form of a thioester and then directly transfers the ubiquitin to targeted substrates,Sina
Ssa07020257	0.191	0.108	1.844	0.714333	0.055	0.522	7.284	2.62033	1.219	2.866	2.136	2.07367	0.38	1.188	0.44	0.669333	1.451	0.37	1.649	1.15667	3.66822	2.90294	1.72809	0	0	0	0	0	0	0	0	0	0.279	0	0	0	0	0	0	0	0	0	#DIV/0!	#DIV/0!	2.154	1.857	1.772	Ssa01002799,Plant calmodulin-binding domain,CaM_binding
Ssa06017453	0.021	0	0	0.007	0.018	0.018	0.041	0.0256667	0	0.044	0.032	0.0253333	0	0.014	0	0.00466667	0.059	0	0	0.0196667	3.66667	3.61905	4.21429	0	0.018	0	0.006	0	0	0.052	0.0173333	0.022	0	0.047	0	0	0.023	0.00766667	0	0	0	0	2.88889	0	64.953	27.506	32.835	Ssa10004683,Belongs to the Casparian strip membrane proteins (CASP) family,DUF588
Ssa09025648	1.504	0.618	7.929	3.35033	2.734	7.321	26.782	12.279	31.118	6.123	8.223	15.1547	1.712	4.728	5.862	4.10067	3.508	1.975	2.697	2.72667	3.66501	4.52333	0.664933	1.981	2.757	3.373	2.70367	7.861	6.179	6.189	6.743	3.767	1.552	8.697	3.484	2.124	10.361	5.323	3.336	2.882	3.119	3.11233	2.49402	0.584695	1.342	1.23	0.546	Ssa03013074,-,-
Ssa02011113	0.03	0	0.207	0.079	0.052	0.13	0.686	0.289333	0.385	0.289	0.141	0.271667	0.206	0.125	0.081	0.137333	0.086	0.141	0.238	0.155	3.66245	3.43882	1.12864	0	0	0	0	0	0	0	0	0	0	0	0.031	0.03	0	0.0203333	0	0	0.028	0.00933333	#DIV/0!	0.459016	1.408	6.495	2.658	Ssa03013943,Importin-9,"IBN_N,Xpo1"
Ssa08022668	0.526	0.137	1.494	0.719	0.141	0.873	6.882	2.632	0.969	2.803	1.485	1.75233	0.184	0.895	0.542	0.540333	0.692	0.264	0.593	0.516333	3.66064	2.43718	0.955583	0	0	0	0	0	0	0	0	0	0.417	0	0	0	0	0	0	0	0	0	#DIV/0!	#DIV/0!	107.295	151.62	60.995	Ssa08023343,WRKY transcription factor,WRKY
Ssa11004907	0.226	0.043	0.712	0.327	0.36	0.585	2.645	1.19667	4.391	1.405	1.794	2.53	0.943	0.912	0.706	0.853667	0.143	0.491	0.297	0.310333	3.65953	7.737	0.36353	0.205	0.291	0.237	0.244333	0.045	0.096	0	0.047	0.479	0.35	0.342	0.509	0.415	0.168	0.364	0.352	0.122	0.421	0.298333	0.19236	0.819597	26.247	38.651	41.37	Ssa04015365,Belongs to the MIP aquaporin (TC 1.A.8) family,MIP
Ssa03013956	0.101	0.401	3.007	1.16967	0.97	3.592	8.279	4.28033	17.822	1.785	2.892	7.49967	1.155	1.158	2.265	1.526	2.072	2.032	1.315	1.80633	3.65945	6.4118	1.1837	1.332	0.958	1.544	1.278	1.64	2.195	2.742	2.19233	1.236	0.576	0.864	1.002	0.61	2.939	1.517	1.474	0.987	0.944	1.135	1.71544	0.748187	0	0	0.126	Ssa05017277,Arabidopsis protein of unknown function,DUF241
Ssa06017792	0.031	0.07	0.425	0.175333	0.296	0.4	1.223	0.639667	0.839	0.428	0.966	0.744333	0.035	0.192	0.414	0.213667	0.117	0.115	0.035	0.089	3.64829	4.24525	0.416537	0.868	0.796	0.714	0.792667	0.629	0.59	0.816	0.678333	3.013	3.062	1.229	2.989	0.929	0.448	1.45533	1.701	1.47	0.892	1.35433	0.855761	0.9306	0.342	1.091	0.359	Ssa05016235,Pentatricopeptide repeat-containing protein,"DYW_deaminase,PPR,PPR_2"
Ssa07021016	2.656	1.737	13.568	5.987	10.329	26.313	28.76	21.8007	84.379	82.26	85.04	83.893	28.956	18.463	14.857	20.7587	44.889	23.181	20.637	29.569	3.64133	14.0125	1.42442	0.253	0.12	0.44	0.271	0.167	0.356	1.23	0.584333	9.182	24.088	97.639	7.994	11.209	4.517	7.90667	17.558	19.943	30.059	22.52	2.15621	2.84823	4.788	8.967	6.544	Ssa12006999,Protein of unknown function (DUF789),DUF789
Ssa03013601	0.04	0.135	0.549	0.241333	0.104	0.241	2.291	0.878667	0.255	1.235	1.622	1.03733	0.045	0.331	0.214	0.196667	0.342	0.149	0.09	0.193667	3.64088	4.29834	0.984746	0.108	0.069	0.168	0.115	0.096	0.153	0.05	0.0996667	0.254	0.577	0.499	0.083	0.28	1.202	0.521667	0.124	0.043	0.112	0.093	0.866667	0.178275	0.44	1.536	2.907	Ssa07020175,choline kinase,"Choline_kin_N,Choline_kinase"
Ssa07020904	16.204	12.095	53.229	27.176	56.982	91.475	148.121	98.8593	346.215	325.358	310.39	327.321	193.469	181.85	237.631	204.317	175.809	132.15	127.786	145.248	3.63774	12.0445	0.710898	40.297	34.896	18.544	31.2457	194.161	186.667	191.389	190.739	536.114	465.741	642.85	269.165	261.01	368.495	299.557	56.888	62.795	65.038	61.5737	6.10449	0.205549	0	0.118	0.337	Ssa01001845,Wall-associated receptor kinase C-terminal,"GUB_WAK_bind,WAK_assoc"
Ssa10003360	1.558	0.389	5.749	2.56533	1.355	5.793	20.816	9.32133	8.146	7.939	11.618	9.23433	1.624	1.543	1.128	1.43167	4.192	1.421	1.627	2.41333	3.63358	3.59966	1.68568	0.386	0.225	0.172	0.261	0.039	0.125	0.062	0.0753333	2.763	1.608	0.876	0.75	0.707	0.877	0.778	0.102	0.266	0.198	0.188667	0.288633	0.242502	19.493	22.229	26.945	Ssa12006479,Bacterial trigger factor protein (TF),Trigger_N
Ssa04015217	0.196	0.221	2.072	0.829667	3.967	1.463	3.611	3.01367	3.643	4.308	3.767	3.906	2.152	3.561	2.387	2.7	263.951	110.89	38.714	137.852	3.63238	4.70791	51.0562	0	0.112	0.205	0.105667	0.312	0.415	0.328	0.351667	10.359	4.036	3.035	5.965	3.92	3.777	4.554	3.586	2.959	1.638	2.72767	3.32808	0.598961	68.383	87.354	103.035	Ssa13009325,PAR1 protein,PAR1
Ssa02010081	1.756	1.332	2.657	1.915	6.79	8.215	5.859	6.95467	5.19	4.331	5.772	5.09767	2.923	2.827	3.254	3.00133	5.727	4.42	3.308	4.485	3.63168	2.66197	1.49434	1.424	1.169	0.138	0.910333	0.251	0.4	0.692	0.447667	1.583	4.598	3.036	1.553	1.655	1.519	1.57567	9.115	4.447	4.709	6.09033	0.491761	3.86524	0.886	2.409	1.687	Ssa12007508,Deoxynucleoside kinase,dNK
Ssa05017394	161.801	59.508	60.863	94.0573	393.477	434.674	195.217	341.123	349.347	211.796	255.652	272.265	282.404	173.633	528.644	328.227	78.108	24.174	20.381	40.8877	3.62675	2.89467	0.124571	2.532	5.397	5.96	4.62967	34.737	40.033	42.508	39.0927	15.642	8.654	4.862	2.18	2.452	2.628	2.42	4.172	4.249	0.976	3.13233	8.44395	1.29435	3.043	2.379	3.716	Ssa03013775,lysine-specific demethylase,"JmjC,zf-4CXXC_R1"
Ssa08022412	0.743	0.291	3.954	1.66267	0.944	2.815	14.311	6.02333	6.118	3.871	6.342	5.44367	3.645	2.056	3.371	3.024	0.924	0.613	0.258	0.598333	3.62269	3.27406	0.197862	0.699	0.319	0.3	0.439333	0.548	0.255	0.395	0.399333	0.576	0.443	0.552	1.041	0.716	0.35	0.702333	1.039	1.205	0.452	0.898667	0.908953	1.27954	8.526	10.582	7.612	Ssa10004546,-,WD40
Ssa11005474	1.658	1.227	2.325	1.73667	5.601	7.291	5.977	6.28967	2.222	3.251	3.9	3.12433	1.193	1.239	2.826	1.75267	2.409	1.652	1.096	1.719	3.62169	1.79904	0.980791	2.278	2.208	2.381	2.289	0.708	0.971	0.839	0.839333	1.797	1.495	1.97	3.191	2.885	1.232	2.436	0.831	1.133	1.703	1.22233	0.366681	0.501779	0.272	0.024	0.11	Ssa01002255,L-type lectin-domain containing receptor kinase,"Lectin_legB,Pkinase,Pkinase_Tyr"
Ssa13009064	0.392	1.266	3.273	1.64367	10.035	3.242	4.573	5.95	2.148	1.165	2.385	1.89933	3.285	2.344	1.852	2.49367	1.384	1.906	1.895	1.72833	3.61996	1.15555	0.693089	18.471	16.635	18.879	17.995	229.49	193.372	170.85	197.904	39.778	65.053	102.439	41.75	23.198	7.399	24.1157	96.857	73.983	87.718	86.186	10.9977	3.57386	10.187	11.886	11.729	Ssa13008552,Golgin candidate,"TMF_DNA_bd,TMF_TATA_bd"
Ssa08022599	19.77	21.896	11.689	17.785	81.575	109.407	2.032	64.338	41.616	193.241	152.486	129.114	29.076	11.718	17.084	19.2927	145.018	58.005	38.049	80.3573	3.61754	7.25973	4.16518	0	0	0	0	0	0.163	0	0.0543333	0	16.558	0	0	0	0	0	0.267	0	0	0.089	#DIV/0!	#DIV/0!	1.887	4.285	3.543	Ssa09025441,Enhancer of polycomb-like,EPL1
Ssa02010133	0.029	0	0.125	0.0513333	0.254	0.101	0.202	0.185667	0.047	0	0.046	0.031	0.033	0.02	0	0.0176667	0.388	0.082	0.132	0.200667	3.61688	0.603896	11.3585	0	0.05	0	0.0166667	0.07	0	0.183	0.0843333	0.216	0.211	0.133	0.182	0.205	0.325	0.237333	0.576	0.663	0.598	0.612333	5.06	2.58006	4.754	7.826	5.77	Ssa03012355,Nucleolar protein 6-like,"Nrap,Nrap_D2,Nrap_D3,Nrap_D4,Nrap_D5,Nrap_D6"
Ssa03013004	0.352	0.367	0.744	0.487667	1.67	2.336	1.285	1.76367	1.296	9.172	6.318	5.59533	0.092	0.973	0.435	0.5	4.37	1.916	1.677	2.65433	3.61654	11.4737	5.30867	0.735	0.952	0.909	0.865333	1.264	1.515	1.191	1.32333	34.453	93.3	2.12	18.567	0.38	9.586	9.511	151.043	45.003	4.71	66.9187	1.52928	7.03592	31.057	33.533	32.423	Ssa10003927,Glyco_18,Glyco_hydro_18
Ssa05015836	1.67	1.106	2.794	1.85667	0.876	5.021	14.238	6.71167	10.482	10.435	19.357	13.4247	3.146	9.018	4.962	5.70867	3.036	2.628	1.849	2.50433	3.6149	7.23052	0.43869	0.938	0.395	0.06	0.464333	0.276	0.476	2.497	1.083	4.178	3.208	4.741	1.527	2.453	7.763	3.91433	3.616	3.018	2.492	3.042	2.33238	0.777144	29.912	50.514	53.897	Ssa13008072,Belongs to the protein kinase superfamily,Pkinase
Ssa02011119	0.711	0.618	0.446	0.591667	2.211	2.527	1.677	2.13833	2.795	1.02	1.217	1.67733	2.241	1.021	1.295	1.519	2.053	2.319	1.942	2.10467	3.61408	2.83493	1.38556	1.288	1.056	1.062	1.13533	2.26	2.402	2.373	2.345	1.188	0.988	1.988	1.052	0.713	0.731	0.832	2.839	2.513	2.52	2.624	2.06547	3.15385	0	0	0	Ssa01001937,DNA-directed RNA-polymerase II subunit,RNA_pol_Rpb4
Ssa09025255	0	0	0.542	0.180667	0	0.084	1.874	0.652667	0.155	0.207	0.152	0.171333	0	0	0	0	0.092	0	0	0.0306667	3.61255	0.948339	#DIV/0!	0.088	0.125	0.051	0.088	0	0	0	0	0	0	0	0	0	0.054	0.018	0.05	0.052	0	0.034	0	1.88889	0	0	0	Ssa08022955,Belongs to the protein kinase superfamily,"Pkinase,Pkinase_Tyr"
Ssa06018981	0.439	0.35	2.616	1.135	1.077	4.925	6.292	4.098	3.173	1.953	3.104	2.74333	0.279	1.561	2.386	1.40867	1.152	0.685	0.698	0.845	3.61057	2.41703	0.599858	1.624	2.137	2.857	2.206	3.832	3.104	2.79	3.242	2.433	0.972	2.052	3.314	2.134	4.989	3.479	1.956	2.217	2.39	2.18767	1.46963	0.628821	6.864	5.378	4.042	Ssa05016365,serine threonine-protein kinase,"B_lectin,DUF3403,DUF3660,PAN_2,Pkinase_Tyr,S_locus_glycop"
Ssa12007376	61.637	27.796	46.285	45.2393	172.504	234.273	83.117	163.298	248.791	90.762	128.218	155.924	236.4	108.446	166.139	170.328	209.06	137.772	60.903	135.912	3.60965	3.44664	0.797939	0	0	0	0	0	2.014	0	0.671333	0.168	0.653	0.359	0	0	0	0	0.082	0.086	0	0.056	#DIV/0!	#DIV/0!	1.313	3.144	2.586	Ssa04015235,Chaperone protein,"DnaJ,DnaJ_C,DnaJ_CXXCXGXG"
Ssa06019099	0.107	0	2.747	0.951333	0.093	0.153	10.054	3.43333	4.2	3.22	3.913	3.77767	0.688	1.647	0.317	0.884	4.322	1.059	3.124	2.835	3.60897	3.97092	3.20701	0	0	0	0	0.043	0	0	0.0143333	0.075	0.293	0	0	0	0	0	0.037	0	0	0.0123333	#DIV/0!	#DIV/0!	19.597	2.637	7.422	Ssa01001992,Belongs to the small heat shock protein (HSP20) family,HSP20
Ssa03012769	0	0	0.056	0.0186667	0.114	0.056	0.032	0.0673333	0	0	0	0	0.186	0.023	0.088	0.099	0	0.122	0.074	0.0653333	3.60714	0	0.659933	0	0	0	0	0	0	0	0	0	0.067	0	0	0	0.036	0.012	0	0	0	0	#DIV/0!	0	22.571	19.302	25.707	Ssa09025067,ABIL2-like,-
Ssa01002485	0.084	0	0	0.028	0.073	0.146	0.084	0.101	0.135	0.45	0.132	0.239	0	0	0	0	0	0	0	0	3.60714	8.53571	#DIV/0!	0	0.072	0	0.024	0	0	0	0	0	0.697	0	0	0	0	0	0.088	0.183	0	0.0903333	0	#DIV/0!	49.191	28.358	36.263	Ssa01001472,Belongs to the TrpA family,Trp_syntA
Ssa06017580	0.601	0.126	2.085	0.937333	0.619	1.019	8.502	3.38	3.058	3.988	2.834	3.29333	0.532	1.694	0.915	1.047	1.375	0.56	1.606	1.18033	3.60597	3.51351	1.12735	0	0.115	0	0.0383333	0	0	0	0	0	0.414	0.076	0.046	0.134	0.025	0.0683333	0	0	0.021	0.007	0	0.102439	196.104	221.096	176.876	Ssa01000242,Belongs to the peptidase A1 family,"Asp,SapB_1,SapB_2"
Ssa03014211	1.055	1.6	1.718	1.45767	4.49	4.82	6.456	5.25533	5.544	7.757	8.372	7.22433	5.437	10.716	9.624	8.59233	1.873	2.199	2.441	2.171	3.60531	4.95609	0.252667	3.873	3.05	2.827	3.25	7.683	6.151	6.18	6.67133	9.739	7.193	4.447	7.739	8.796	12.532	9.689	4.094	3.812	3.981	3.96233	2.05272	0.408952	12.694	8.007	7.659	Ssa01002261,Vacuolar iron transporter homolog,VIT1
Ssa03012725	14.079	6.629	17.824	12.844	43.965	49.631	45.287	46.2943	15.304	49.867	56.839	40.67	5.165	14.115	14.516	11.2653	11.732	10.855	3.782	8.78967	3.60435	3.16646	0.78024	7.512	2.499	0.997	3.66933	0.733	0.86	0.61	0.734333	3.6	30.472	3.308	4.236	2.602	2.775	3.20433	0.635	0.707	0.314	0.552	0.200127	0.172267	0	0	0	Ssa06018938,-,-
Ssa02011305	0	0	0.01	0.00333333	0	0	0.036	0.012	0.019	0	0	0.00633333	0	0.033	0	0.011	0.012	0.023	0	0.0116667	3.6	1.9	1.06061	0.022	0	0.025	0.0156667	0.015	0	0	0.005	0	0.037	0	0	0.012	0	0.004	0	0.013	0	0.00433333	0.319149	1.08333	0.128	0.051	0.116	Ssa02009443,Belongs to the peroxidase family. Classical plant (class III) peroxidase subfamily,peroxidase
Ssa10004270	0	0	0.087	0.029	0.044	0.044	0.225	0.104333	0.04	1.295	0.751	0.695333	0	0.035	0.068	0.0343333	0.024	0	0.057	0.027	3.5977	23.977	0.786408	0.229	0.022	0.159	0.136667	0	0	0.064	0.0213333	0.161	0.601	1.926	0.237	0.228	0.056	0.173667	4.94	0.766	2.262	2.656	0.156098	15.2937	189.67	138.46	201.23	Ssa03012361,MIP18 family protein At1g68310-like,FeS_assembly_P
Ssa04015189	0	0.902	0.429	0.443667	0.26	1.466	3.062	1.596	2.551	0.532	1.404	1.49567	0.341	0.276	2.586	1.06767	0	0.186	0.225	0.137	3.5973	3.37115	0.128317	4.159	4.969	8.383	5.837	2.272	1.525	4.268	2.68833	3.914	5.873	2.155	8.41	12.41	4.561	8.46033	1.451	1.295	1.859	1.535	0.460568	0.181435	47.72	39.122	47.968	Ssa02011177,Cilia- and flagella-associated protein,DUF667
Ssa01001691	24.682	11.233	12.659	16.1913	74.288	67.041	33.392	58.2403	18.273	22.449	20.281	20.3343	20.933	16.612	21.83	19.7917	19.637	22.185	14.921	18.9143	3.59701	1.25588	0.955672	2.577	1.259	1.32	1.71867	1.256	1.258	1.619	1.37767	1.936	2.813	3.742	1.184	2.582	0.1	1.28867	0.342	0.065	0.279	0.228667	0.80159	0.177444	14.548	10.382	10.678	Ssa04014468,Steroid 5-alpha-reductase,Steroid_dh
Ssa11005902	9.24	3.538	7.049	6.609	16.2	25.503	29.587	23.7633	2.701	18.331	11.472	10.8347	3.993	9.205	16.169	9.789	4.523	3.618	3.142	3.761	3.5956	1.63938	0.384207	1.276	1.72	2.038	1.678	2.626	1.555	1.181	1.78733	9.756	8.241	3.949	2.41	1.381	1.989	1.92667	0.878	0.745	1.37	0.997667	1.06516	0.51782	3.836	6.698	7.092	Ssa13008319,Belongs to the class I-like SAM-binding methyltransferase superfamily. Cation-independent O- methyltransferase family,"Dimerisation,Methyltransf_2"
Ssa07021464	0.105	0	0.136	0.0803333	0.046	0.091	0.729	0.288667	0.168	0	0.123	0.097	0.12	0.036	0	0.052	0	0.049	0	0.0163333	3.59336	1.20747	0.314103	0.667	2.123	2.155	1.64833	0.756	0.804	4.963	2.17433	0.223	0.054	0.239	3.175	1.161	0	1.44533	1.311	0.626	2.303	1.41333	1.31911	0.97786	25.226	56.758	36.785	Ssa10004327,26S proteasome non-ATPase regulatory subunit,PCI
Ssa02011195	0.772	0.291	3.93	1.66433	0.92	2.839	14.169	5.976	6.255	3.81	6.431	5.49867	3.71	2.037	3.396	3.04767	0.924	0.613	0.258	0.598333	3.59063	3.30383	0.196325	0.751	0.319	0.3	0.456667	0.582	0.255	0.395	0.410667	0.576	0.413	0.552	1.041	0.688	0.35	0.693	1.069	1.174	0.426	0.889667	0.89927	1.28379	0.432	0.632	1.182	Ssa05016351,G-type lectin S-receptor-like serine threonine-protein kinase,"B_lectin,DUF3403,PAN_2,Pkinase_Tyr,S_locus_glycop"
Ssa01001207	5.776	10.335	5.207	7.106	37.631	26.861	12.048	25.5133	0.913	2.743	3.528	2.39467	0.911	1.384	1.021	1.10533	3.206	2.344	2.384	2.64467	3.59039	0.336992	2.39264	2.227	1.619	2.581	2.14233	1.096	0.801	1.725	1.20733	2.06	3.304	0.649	0.416	0.401	0.637	0.484667	0.95	0.433	0.852	0.745	0.56356	1.53714	10.116	14.492	11.763	Ssa08022961,Belongs to the protein kinase superfamily,"Pkinase,Pkinase_Tyr"
Ssa08023171	0.354	0	3.646	1.33333	0.351	3.359	10.645	4.785	11.78	2.208	4.617	6.20167	1.035	2.9	4.242	2.72567	0.048	0.141	0	0.063	3.58875	4.65125	0.0231136	0.046	0.173	0.318	0.179	0.242	0	0.381	0.207667	0.642	0.365	2.754	1.891	1.519	0.113	1.17433	0.052	0.273	0.235	0.186667	1.16015	0.158955	12.543	15.161	18.252	Ssa07020658,Pseudouridine synthase,"PseudoU_synth_2,S4"
Ssa13008716	0.04	0.135	0.549	0.241333	0.104	0.241	2.252	0.865667	0.255	1.192	1.622	1.023	0.045	0.331	0.214	0.196667	0.342	0.112	0.09	0.181333	3.58702	4.23895	0.922034	0.108	0.069	0.168	0.115	0.096	0.153	0.05	0.0996667	0.212	0.577	0.499	0.083	0.28	1.202	0.521667	0.166	0.086	0.112	0.121333	0.866667	0.232588	0.139	0	0	Ssa12006880,WRKY transcription factor,WRKY
Ssa06019799	0.565	0.228	2.689	1.16067	0.895	3.923	7.67	4.16267	2.451	1.378	2.192	2.007	0.322	1.564	1.659	1.18167	0.729	0.263	0.205	0.399	3.58644	1.72918	0.337659	1.061	1.178	1.356	1.19833	2.056	1.799	1.599	1.818	1.647	0.792	1.376	2.184	1.882	4.77	2.94533	1.111	1.091	1.429	1.21033	1.51711	0.410933	4.013	1.403	7.396	Ssa01002331,Agglutinin domain,"Aerolysin,Agglutinin,ETX_MTX2"
Ssa12007232	0.113	0.025	0.387	0.175	0.098	0.311	1.472	0.627	0.54	1.803	1.743	1.362	0.231	0.203	0.101	0.178333	0.257	0.105	0.025	0.129	3.58286	7.78286	0.723364	0	0.019	0	0.00633333	0	0	0	0	0.024	0.349	0.051	0.023	0.023	0	0.0153333	0	0	0.063	0.021	0	1.36957	2.83	10.162	6.511	Ssa01000606,transcription factor,TCP
Ssa01001090	0.928	1.965	2.639	1.844	3.477	9.311	6.996	6.59467	27.682	18.418	21.189	22.4297	3.167	4.731	6.835	4.911	5.123	3.781	4.051	4.31833	3.57628	12.1636	0.879319	0.84	1.244	1.521	1.20167	8.332	9.077	11.006	9.47167	45.145	42.295	9.482	18.206	6.102	2.39	8.89933	15.226	15.101	3.346	11.2243	7.88211	1.26126	6.039	1.542	0	Ssa11005023,-,-
Ssa11005343	9.419	2.526	37.888	16.611	48.979	56.692	72.197	59.2893	58.794	23.27	35.974	39.346	16.4	18.559	35.571	23.51	5.149	9.156	3.054	5.78633	3.56928	2.36867	0.246122	9.776	10.222	14.445	11.481	23.489	30.412	21.062	24.9877	18.386	27.139	43.501	25.828	12.179	4.577	14.1947	12.814	17.619	13.934	14.789	2.17644	1.04187	2.379	2.278	1.662	Ssa02009795,Participates in DNA repair and in chromosomal DNA replication,"DNA_pol_E_B,Dpoe2NT"
Ssa09025096	0.075	0.162	0.064	0.100333	0.18	0.422	0.472	0.358	0.037	0.417	0.292	0.248667	0.164	0.322	0.067	0.184333	0.377	0.322	0.318	0.339	3.56811	2.47841	1.83906	0.036	0.054	0.085	0.0583333	0.048	0.044	0.051	0.0476667	0.055	0.077	0.013	0.03	0.075	0.013	0.0393333	0.078	0.05	0.048	0.0586667	0.817143	1.49153	54.083	35.554	48.765	Ssa09025514,La protein,"La,RRM_1,RRM_3"
Ssa12007599	0.059	0.067	0.051	0.059	0.258	0.256	0.117	0.210333	0	0.38	0.417	0.265667	0.203	0.246	0.212	0.220333	0	0.332	0.134	0.155333	3.56497	4.50282	0.704992	0.376	0.153	0.872	0.467	4.833	2.795	12.833	6.82033	31.938	37.72	36.126	2.653	1.725	1.719	2.03233	4.682	3.079	3.646	3.80233	14.6046	1.87092	10.16	13.804	12.195	Ssa04015351,Belongs to the major facilitator superfamily. Sugar transporter (TC 2.A.1.1) family,Sugar_tr
Ssa09025689	0.041	0.37	0.07	0.160333	0.463	0.602	0.649	0.571333	0.393	0.262	0.416	0.357	0.093	0.567	0.622	0.427333	0.078	0.153	0.046	0.0923333	3.56341	2.22661	0.216069	0.334	1.582	1.548	1.15467	2.159	1.773	2.009	1.98033	0.521	0.507	0.047	0.597	0.123	0.685	0.468333	0.128	0	0.076	0.068	1.71507	0.145196	5.635	5.633	5.768	Ssa11006178,Belongs to the TRAFAC class myosin-kinesin ATPase superfamily. Kinesin family,"FERM_M,FERM_N,Kinesin,MyTH4"
Ssa09024005	0.175	0.871	1.184	0.743333	0.17	0.231	7.54	2.647	1.38	11.043	10.355	7.59267	0.047	0.071	0.165	0.0943333	0.381	0.345	0.51	0.412	3.56099	10.2143	4.36749	0.298	0.229	0.216	0.247667	0.333	0.262	0.233	0.276	0.218	2.813	0.012	0.118	0.113	0.034	0.0883333	3.556	1.09	1.293	1.97967	1.1144	22.4113	99.247	90.923	117.563	Ssa08023672,mediator of RNA polymerase II transcription subunit,Med26
Ssa01000912	11.043	10.049	17.706	12.9327	37.68	41.332	59.134	46.0487	57.627	47.965	56.172	53.9213	73.242	70.277	90.279	77.9327	29.584	40.153	33.369	34.3687	3.56065	4.16939	0.441005	27.216	51.245	46.789	41.75	218.778	175.544	271.3	221.874	130.615	77.702	182.116	306.076	292.934	139.193	246.068	118.746	84.603	121.111	108.153	5.31435	0.439527	35.51	69.064	68.892	Ssa03012231,f-box protein,"DUF295,F-box"
Ssa06017936	0.15	0.203	0.206	0.186333	1.224	0.647	0.119	0.663333	0.048	0.575	0.585	0.402667	0.375	0.124	0.054	0.184333	0.541	0.363	0.236	0.38	3.55993	2.161	2.06148	0.461	0.051	0.031	0.181	0.179	0	0	0.0596667	0.286	1.051	6.022	0.125	0.751	0	0.292	0.093	0.712	0.223	0.342667	0.32965	1.17352	6.192	11.931	7.263	Ssa06018660,CRS1_YhbY,CRS1_YhbY
Ssa13008563	0	0.065	0.198	0.0876667	0.15	0.1	0.685	0.311667	0.553	1.046	0.631	0.743333	0.394	0.399	0.103	0.298667	0.493	0.161	0.78	0.478	3.55513	8.47909	1.60045	0	0	0	0	0	0	0	0	0	0.06	0	0	0	0	0	0	0	0	0	#DIV/0!	#DIV/0!	1.487	0.981	0.99	Ssa02011776,Pentatricopeptide repeat-containing protein,"PPR,PPR_2"
Ssa05017164	0.067	0.03	0.527	0.208	0.046	0.219	1.953	0.739333	0.469	0.839	0.917	0.741667	0.167	0.683	0.477	0.442333	0.456	0.211	0.436	0.367667	3.55449	3.56571	0.831198	0	0	0	0	0	0	0	0	0	0.069	0.015	0.028	0.013	0.03	0.0236667	0	0	0.025	0.00833333	#DIV/0!	0.352113	0.298	0.476	2.72	Ssa11005270,Belongs to the LDH MDH superfamily,"Ldh_1_C,Ldh_1_N"
Ssa06019326	0.472	0.533	0.135	0.38	1.64	0.543	1.867	1.35	0.251	1.174	1.474	0.966333	0.716	1.305	0.562	0.861	0.149	0.147	0.354	0.216667	3.55263	2.54298	0.251645	0.142	0.135	0.165	0.147333	0.188	0.2	0.198	0.195333	0.666	0.162	0.179	0.491	0.315	0	0.268667	0.163	0	0.293	0.152	1.32579	0.565757	123.955	101.932	98.988	Ssa13008857,Plasminogen activator inhibitor 1 RNA-binding protein-like,"HABP4_PAI-RBP1,Stm1_N"
Ssa13008929	0.746	1.927	1.007	1.22667	3.151	3.682	6.222	4.35167	1.022	2.387	3.58	2.32967	0.728	5.161	3.047	2.97867	1.013	0.497	0.721	0.743667	3.54755	1.89918	0.249664	4.827	3.933	7.721	5.49367	1.788	1.221	3.753	2.254	4.518	4.071	0.605	4.656	8.122	1.069	4.61567	1.107	3.918	5.359	3.46133	0.410291	0.74991	8.151	10.706	11.013	Ssa10004732,Polynucleotide 5'-hydroxyl-kinase NOL9-like,CLP1_P
Ssa01001566	0.508	0.144	0.349	0.333667	1.149	1.47	0.93	1.183	0.893	1.382	1.112	1.129	1.128	1.195	1.021	1.11467	0.966	0.734	0.716	0.805333	3.54545	3.38362	0.722488	0.069	0.087	0.053	0.0696667	0.304	0.065	0.224	0.197667	0.215	0.367	0.433	0.291	0.102	0.113	0.168667	0.264	0.082	0.189	0.178333	2.83732	1.05731	0	0	0	Ssa07020432,Alpha-L-arabinofuranosidase,Alpha-L-AF_C
Ssa07020616	0	0.117	0.536	0.217667	0.181	0.18	1.954	0.771667	0.996	0	0.162	0.386	0.118	0.216	0.464	0.266	0.198	0.097	0.117	0.137333	3.54518	1.77335	0.516291	0	0.089	0	0.0296667	0	0	0	0	0	0.751	0	0.108	0	0	0.036	0	0.112	0	0.0373333	0	1.03704	4.629	1.876	1.205	Ssa08023425,F-box protein SKIP16-like,"DUF525,UVR"
Ssa01000044	0.046	0.154	0.431	0.210333	0.198	0.551	1.488	0.745667	0.873	0.146	0.427	0.482	0.208	0.567	0.366	0.380333	0.173	0.085	0.205	0.154333	3.54517	2.2916	0.405784	0.124	0.196	0.144	0.154667	0.71	0.696	0.458	0.621333	0.338	0.094	0.932	0.19	0.046	0.203	0.146333	0.047	0.049	0.297	0.131	4.01724	0.895216	82.426	91.938	112.166	Ssa02011743,"Ubiquitin exists either covalently attached to another protein, or free (unanchored). When covalently bound, it is conjugated to target proteins via an isopeptide bond either as a monomer (monoubiquitin), a polymer linked via different Lys residues of the ubiquitin (polyubiquitin chains) or a linear polymer linked via the initiator Met of the ubiquitin (linear polyubiquitin chains). …
Ssa12007592	0.351	0	0.664	0.338333	0.122	0	3.476	1.19933	0	1.948	5.269	2.40567	0	0	0.314	0.104667	0.334	0.327	6.733	2.46467	3.54483	7.11034	23.5478	0.127	0	0.295	0.140667	0.421	0	0	0.140333	0.149	4.641	0.798	0	0	0	0	11.746	0.38	2.813	4.97967	0.99763	#DIV/0!	2.065	9.789	16.602	Ssa05017350,"Dirigent proteins impart stereoselectivity on the phenoxy radical-coupling reaction, yielding optically active lignans from two molecules of coniferyl alcohol in the biosynthesis of lignans, flavonolignans, and alkaloids and thus plays a central role in plant secondary metabolism",Dirigent
Ssa10003837	0.078	0.044	0.671	0.264333	0.306	0.843	1.662	0.937	0.374	0.5	0.671	0.515	0.089	0.108	0.174	0.123667	0.445	0.291	0.044	0.26	3.54477	1.9483	2.10243	0.142	0	0.123	0.0883333	0.234	0.149	0.049	0.144	0.331	0.766	0.044	0.081	0.039	0.174	0.098	1.055	0.338	0.182	0.525	1.63019	5.35714	7.75	2.061	3.214	Ssa13009259,Protein trichome birefringence-like 3,"PC-Esterase,PMR5N"
Ssa03013059	0	0	0.414	0.138	0	0.035	1.431	0.488667	0.193	0.043	0.094	0.11	0	0.056	0.251	0.102333	0.038	0	0.045	0.0276667	3.54106	0.797101	0.270358	0	0	0	0	0	0	0	0	0	0	0	0	0	0.313	0.104333	0	0	0	0	#DIV/0!	0	9.064	5.611	6.037	Ssa13009094,Pentatricopeptide repeat-containing protein,"PPR,PPR_2,PPR_3"
Ssa06019041	0.188	0	3.226	1.138	0.49	1.621	9.968	4.02633	11.894	2.202	3.373	5.823	0.356	1.298	2.012	1.222	1.784	0.525	1.27	1.193	3.53808	5.11687	0.976268	0.057	0.107	0.328	0.164	0.075	0.08	0.157	0.104	0	0.194	0.213	0.195	0.063	0.697	0.318333	0.13	0	0.35	0.16	0.634146	0.502618	0	0.18	0	Ssa04014880,Late embryogenesis abundant (LEA) group 1,LEA_1
Ssa05016146	1.881	0.513	3.788	2.06067	0.62	4.76	16.485	7.28833	2.589	7.743	7.799	6.04367	1.845	2.556	1.564	1.98833	3.573	0.665	0.438	1.55867	3.53688	2.93287	0.783906	0.176	0.167	0	0.114333	0	0	0	0	0.344	0.535	1.031	0.877	0.52	0.145	0.514	0	0.14	0.06	0.0666667	0	0.129702	9.948	7.402	7.027	Ssa01002329,Belongs to the purine pyrimidine phosphoribosyltransferase family,Pribosyltran
Ssa13008188	1.233	5.852	0.424	2.503	7.612	11.502	7.442	8.852	2.167	59.039	34.483	31.8963	1.544	92.541	47.478	47.1877	0.352	0.575	0.834	0.587	3.53656	12.7432	0.0124397	13.403	9.947	19.287	14.2123	19.35	1.884	6.048	9.094	37.633	19.218	3.502	164.673	175.919	166.15	168.914	6.274	13.331	22.045	13.8833	0.639867	0.0821917	51.389	19.968	34.465	Ssa13008901,Protein of unknown function (DUF3128),DUF3128
Ssa06018403	0.024	0	0.021	0.015	0	0.063	0.096	0.053	0	0	0.019	0.00633333	0	0.017	0.022	0.013	0	0	0	0	3.53333	0.422222	0	0	0	0	0	0	0	0	0	0	0.025	0	0	0	0	0	0	0	0	0	#DIV/0!	#DIV/0!	65.267	52.371	74.111	Ssa09025989,-,-
Ssa13008094	0.497	0.473	1.101	0.690333	1.501	2.462	3.337	2.43333	1.963	2.454	3.391	2.60267	1.34	2.894	4.438	2.89067	2.833	3.119	2.358	2.77	3.52487	3.77016	0.958256	3.718	3.546	4.529	3.931	1.159	0.699	2.137	1.33167	1.663	1.754	2.109	2.828	4.011	2.827	3.222	18.164	17.216	15.826	17.0687	0.33876	5.29754	241.875	264.951	268.189	Ssa12006468,guanosine nucleotide diphosphate dissociation inhibitor,GDI
Ssa10004009	0	0	0.452	0.150667	0.087	1.06	0.446	0.531	0.64	0.107	0.196	0.314333	0.2	0.052	0.022	0.0913333	0	0.023	0	0.00766667	3.52434	2.08628	0.0839416	0	0	0	0	0	0	0	0	0	0.026	0	0	0	0	0	0	0	0	0	#DIV/0!	#DIV/0!	12.777	14.08	13.641	Ssa12007881,Protein kinase domain,Pkinase
Ssa12007811	0.347	0.336	0.723	0.468667	2.239	1.283	1.421	1.64767	1.226	0.528	0.793	0.849	0.564	0.891	0.73	0.728333	11.059	8.813	6.112	8.66133	3.51565	1.81152	11.892	0.673	0.68	0.13	0.494333	0.475	0.315	0.249	0.346333	0.21	0.562	0.45	0.361	0.298	0.386	0.348333	0.18	0.348	0.323	0.283667	0.700607	0.814354	0.524	0.791	1.108	Ssa07020088,Disease resistance protein (TIR-NBS-LRR class),"NB-ARC,TIR"
Ssa01001699	0.342	0.268	0.384	0.331333	1.396	0.795	1.302	1.16433	3.573	1.207	1.624	2.13467	4.074	2.439	3.855	3.456	1.875	1.814	1.216	1.635	3.51408	6.44266	0.47309	0.667	0.768	1.022	0.819	6.052	6.064	8.868	6.99467	6.33	3.748	7.951	16.092	12.874	6.716	11.894	8.415	8.022	12.52	9.65233	8.5405	0.81153	19.285	33.003	28.054	Ssa08023582,Belongs to the short-chain dehydrogenases reductases (SDR) family,adh_short
Ssa02011665	6.572	5.197	2.581	4.78333	6.366	8.107	35.939	16.804	3.748	15.314	26.175	15.079	1.817	18.633	18.867	13.1057	1.606	1.749	2.222	1.859	3.51303	3.1524	0.141847	8.927	5.075	11.233	8.41167	1.574	0.717	6.964	3.085	27.85	31.679	5.012	24.991	14.868	11.507	17.122	7.602	8.118	6.467	7.39567	0.366753	0.431939	9.001	11.388	11.255	Ssa02011495,Cleavage inducing molecular chaperone,"DnaJ,Jiv90"
Ssa05017023	0	0	0.078	0.026	0	0.029	0.245	0.0913333	0.026	0.097	0.155	0.0926667	0.028	0.023	0.03	0.027	0.047	0	0	0.0156667	3.51282	3.5641	0.580247	0.022	0.021	0.026	0.023	0.02	0.021	0	0.0136667	0.018	0.043	0.056	0.026	0.066	0.046	0.046	0.146	0.179	0.269	0.198	0.594203	4.30435	191.339	168.419	173.033	Ssa01001625,Protein of unknown function (DUF1336),DUF1336
Ssa03012837	3.86	1.642	38.428	14.6433	10.62	44.943	98.744	51.4357	114.485	13.727	29.457	52.5563	14.293	31.25	62.427	35.99	2.309	5.162	1.228	2.89967	3.51257	3.5891	0.0805687	2.57	2.689	2.193	2.484	1.877	3.787	2.427	2.697	1.444	5.015	26.823	7.296	2.299	0.911	3.502	1.957	4.663	3.213	3.27767	1.08575	0.935941	106.828	70.3	99.787	Ssa02011975,-,-
Ssa10003826	73.166	56.112	87.742	72.34	260.306	309.848	192.091	254.082	301.19	219.934	175.943	232.356	308.461	189.131	219.059	238.884	108.255	115.363	86.182	103.267	3.51233	3.21199	0.432289	69.218	102.058	84.05	85.1087	190.477	173.803	181.101	181.794	203.141	199.192	219.364	97.774	115.949	50.41	88.0443	64.237	39.797	39.704	47.9127	2.13602	0.544188	94.947	55.073	70.719	Ssa08023203,Histone H2A,"Histone,Histone_H2A_C"
Ssa11006381	3.754	0.726	5.839	3.43967	4.469	12.323	19.402	12.0647	25.221	3.353	4.358	10.9773	1.039	3.344	3.836	2.73967	1.767	0.945	0.038	0.916667	3.50751	3.19139	0.334591	0	0.029	0	0.00966667	0	0.646	0	0.215333	0	0.174	0	0	0	0	0	0	0	0	0	22.2759	#DIV/0!	46.357	59.24	47.295	Ssa02009996,"Serine aminopeptidase, S33",Hydrolase_4
Ssa03013912	0.12	0	1.996	0.705333	0.139	1.211	6.064	2.47133	3.967	0.513	1.252	1.91067	0.137	0.277	0.537	0.317	0.837	0.149	0.226	0.404	3.50378	2.70888	1.27445	0	0.034	0	0.0113333	0.096	0.102	0.101	0.0996667	0.042	0	0.137	1	0	1.741	0.913667	0.042	0.173	0.336	0.183667	8.79412	0.201022	13.6	16.694	15.707	Ssa06017560,response to cisplatin,"JmjC,WRC,zf-4CXXC_R1"
Ssa09025262	20.565	12.708	16.989	16.754	74.477	56.274	45.319	58.69	13.426	33.143	42.748	29.7723	20.239	34.464	17.232	23.9783	15.257	17.13	14.655	15.6807	3.50304	1.77703	0.653951	45.733	41.203	13.552	33.496	89.06	93.924	90.985	91.323	42.901	34.42	67.356	147.135	126.249	82.657	118.68	58.298	52.429	60.556	57.0943	2.72639	0.481077	10.979	21.932	18.089	Ssa10003635,chromatin-remodeling complex ATPase,"DBINO,HAND,Helicase_C,SLIDE,SNF2_N"
Ssa10004261	0.097	0.733	0.808	0.546	0.225	0.7	4.811	1.912	4.142	0.864	1.722	2.24267	1.033	5.202	2.548	2.92767	3.358	1.057	3.91	2.775	3.50183	4.10745	0.947854	0	0.028	0	0.00933333	0	0	0	0	0.069	0.201	0	0.034	0.032	0.325	0.130333	0.101	0.07	0.03	0.067	0	0.514066	3.019	2.815	3.858	Ssa02009476,Sucrose transport,MFS_2
Ssa11005288	0	0	0.507	0.169	0	0.096	1.679	0.591667	0.884	0.197	0.72	0.600333	0	0.153	0.231	0.128	0.526	0.172	0.333	0.343667	3.50099	3.55227	2.6849	0.1	0	0	0.0333333	0	0	0	0	0	0.038	0	0	0	0.041	0.0136667	0.077	0	0	0.0256667	0	1.87805	24.112	18.809	26.327	Ssa03012229,Arabidopsis protein of unknown function,DUF241
Ssa04014350	24.907	27.234	21.394	24.5117	102.69	96.75	57.873	85.771	70.646	53.376	62.108	62.0433	111.362	57.352	89.491	86.0683	71.747	62.46	57.789	63.9987	3.49919	2.53118	0.74358	0	0	0	0	0	0.122	0	0.0406667	0	1.019	0	0	0	0	0	0	0	0	0	#DIV/0!	#DIV/0!	24.41	19.533	23.015	Ssa11006085,"protein At1g32220, chloroplastic-like",NAD_binding_10
Ssa05015821	0.249	0.254	0.794	0.432333	0.412	0.962	3.164	1.51267	3.254	2.943	3.275	3.15733	1.267	2.064	2.994	2.10833	0.281	0.629	0.12	0.343333	3.49884	7.30301	0.162846	0.236	0.091	0.012	0.113	0.071	0.075	0.089	0.0783333	0.339	0.672	0.215	0.283	0.119	0.145	0.182333	0.098	0.077	0.11	0.095	0.693215	0.521024	11.915	7.423	5.688	Ssa11006169,Cytochrome p450,p450
Ssa02012064	0.325	0.262	0.678	0.421667	0.565	0.922	2.939	1.47533	1.409	0.148	0.254	0.603667	0.476	0.257	0.249	0.327333	0.441	0.303	0.314	0.352667	3.49881	1.43162	1.07739	0.168	0.08	0.146	0.131333	0.167	0.295	0.292	0.251333	0.098	0.192	0.211	0.29	0.093	5.069	1.81733	0	0.151	0	0.0503333	1.91371	0.0276963	2.308	2.725	2.887	Ssa10004573,Ribosomal protein S1-like RNA-binding domain,-
Ssa07020550	5.431	3.738	3.103	4.09067	13.374	15.815	13.669	14.286	12.224	10.126	7.379	9.90967	6.268	9.346	12.816	9.47667	2.52	3.06	1.082	2.22067	3.49234	2.42251	0.23433	0.069	0.043	0.053	0.055	0.212	0.547	0.159	0.306	0.428	0.704	0.545	0.263	0.152	1.323	0.579333	0.629	0.601	0.635	0.621667	5.56364	1.07307	7.464	13.708	14.399	Ssa06019084,receptor-like protein kinase,"LRR_4,LRR_8,Malectin_like"
Ssa09024075	6.608	5.311	12.389	8.10267	29.937	30.998	23.883	28.2727	41.398	21.981	34.586	32.655	34.351	20.453	22.245	25.683	177.721	116.288	105.082	133.03	3.4893	4.03015	5.1797	26.668	27.257	19.671	24.532	26.329	28.347	42.098	32.258	39.649	40.584	75.232	47.04	53.401	72.884	57.775	49.567	42.578	52.465	48.2033	1.31494	0.834329	4.842	25.15	19.477	Ssa10004053,EIN3-binding F-box protein,"F-box,F-box-like,LRR_6"
Ssa07020752	3.774	3.248	1.544	2.85533	9.999	9.932	9.955	9.962	1.722	5.556	6.737	4.67167	1.432	5.468	7.544	4.81467	1.025	0.837	2.025	1.29567	3.48891	1.63612	0.269108	0.163	0.154	0.189	0.168667	0	0	0	0	0.381	0.371	0.204	0.748	0.54	0.401	0.563	0	0.388	0.669	0.352333	0	0.625814	11.196	21.968	14.842	Ssa10004196,Belongs to the actin family,Actin
Ssa11005501	1.102	1.538	3.454	2.03133	2.424	16.183	2.63	7.079	190.34	92.432	84.018	122.263	2.879	5.157	3.591	3.87567	3.389	2.175	2.046	2.53667	3.4849	60.1887	0.654511	5.99	8.012	32.94	15.6473	71.217	74.619	54.951	66.929	694.315	1066.97	212.415	708.693	81.314	45.377	278.461	769.512	727.673	49.683	515.623	4.27734	1.85168	3.618	1.958	1.405	Ssa07021663,Pentatricopeptide repeat-containing protein,"DYW_deaminase,PPR,PPR_2"
Ssa09025253	0.114	0	0.275	0.129667	0.02	0.296	1.039	0.451667	1.896	1.874	1.373	1.71433	0.312	0.379	0.51	0.400333	0.108	0.234	0.051	0.131	3.48329	13.2211	0.327227	0.165	0.294	0.288	0.249	0	0.116	0.029	0.0483333	0.145	0.141	0.078	0.047	0.137	0	0.0613333	0.166	0.123	0.085	0.124667	0.19411	2.03261	28.656	38.33	43.158	Ssa10003125,Belongs to the cyclin family,Cyclin_N
Ssa05016272	0.128	0.103	0.423	0.218	0.365	0.757	1.156	0.759333	0.554	1.888	2.353	1.59833	0.52	0.139	0.163	0.274	0.815	0.663	0.185	0.554333	3.48318	7.3318	2.02311	2.96	1.238	0.69	1.62933	1.246	1.325	0.941	1.17067	8.86	9.684	3.588	1.158	1.171	0.732	1.02033	13.496	9.216	9.179	10.6303	0.718494	10.4185	3.466	1.901	2.829	Ssa11004922,Protein SHI RELATED SEQUENCE,DUF702
Ssa09024969	0	0	0.029	0.00966667	0	0	0.101	0.0336667	0	0.109	0.451	0.186667	0	0	0	0	0	0.032	0	0.0106667	3.48276	19.3103	#DIV/0!	0.308	0.058	0.071	0.145667	0	0	0	0	0.72	1.544	0.116	0	0	0	0	2.788	0.331	0.253	1.124	0	#DIV/0!	16.031	13.986	13.114	Ssa08022157,Nuclear fragile X mental retardation-interacting protein 1 (NUFIP1),NUFIP1
Ssa13008099	0.081	0.092	0	0.0576667	0.141	0.14	0.321	0.200667	0	0.26	0.127	0.129	0.277	0.056	0.072	0.135	0.154	0.227	0.183	0.188	3.47977	2.23699	1.39259	1.102	0.905	1.448	1.15167	0.486	0.517	1.122	0.708333	1.118	0.67	0	0.675	1.22	0.814	0.903	0.674	0.702	0.831	0.735667	0.615051	0.814692	7.444	6.929	7.136	Ssa03014203,Zinc finger domain,"UQ_con,zf-RanBP"
Ssa03013594	0.08	0.023	0	0.0343333	0.035	0.086	0.237	0.119333	0.223	0.043	0.109	0.125	0.023	0.041	0.196	0.0866667	0.038	0.037	0.022	0.0323333	3.47573	3.64078	0.373077	0.054	0.051	0	0.035	0	0.051	0.075	0.042	0.127	0.041	0.113	0.083	0.08	0.067	0.0766667	0.083	0.043	0.037	0.0543333	1.2	0.708696	7.322	7.018	6.065	Ssa11005819,SNF1-related protein kinase regulatory subunit gamma-1-like,CBS
Ssa09024909	7.466	2.258	7.07	5.598	30.407	17.614	10.293	19.438	3.38	8.523	6.795	6.23267	12.312	1.748	0.683	4.91433	24.911	10.187	4.969	13.3557	3.47231	1.11337	2.7177	6.016	6.506	4.195	5.57233	49.143	59.264	19.143	42.5167	32.574	17.471	47.273	4.707	5.244	1.048	3.66633	21.97	34.057	26.761	27.596	7.62996	7.52687	1.99	1.687	2.832	Ssa01001135,cytochrome P450,p450
Ssa11006060	2.966	0.162	15.984	6.37067	1.081	17.472	47.789	22.114	34.451	12.545	21.854	22.95	3.648	4.83	9.826	6.10133	37.994	9.715	7.116	18.275	3.47122	3.60245	2.99525	0	0.082	0	0.0273333	0	0	0.12	0.04	0.507	0.888	1.141	0.099	0.048	0.373	0.173333	0.248	0.103	0.356	0.235667	1.46341	1.35962	0	0	0	Ssa09025890,Belongs to the AAA ATPase family,"AAA,AAA_assoc"
Ssa04014907	0.398	0.368	1.677	0.814333	1.163	2.31	5.006	2.82633	3.752	0.732	2.484	2.32267	0.411	1	1.13	0.847	0.962	0.472	0.367	0.600333	3.47073	2.85223	0.708776	1.67	1.551	1.631	1.61733	2.035	1.887	1.5	1.80733	2.681	1.156	1.15	1.316	1.377	0.765	1.15267	1.464	1.172	2.087	1.57433	1.11748	1.36582	0	0	0.033	Ssa05015959,9-cis-epoxycarotenoid dioxygenase,RPE65
Ssa08022738	0.085	0	0	0.0283333	0.222	0.073	0	0.0983333	0.679	0	0.133	0.270667	0	0.059	0.152	0.0703333	0.081	0.079	0.192	0.117333	3.47059	9.55294	1.66825	0.154	0.073	0.268	0.165	0.509	1.515	21.802	7.942	0.27	0	11.392	0.53	0.17	10.797	3.83233	0	0.092	0.079	0.057	48.1333	0.0148734	0.267	1.359	1.826	Ssa04014479,At1g04910-like,O-FucT
Ssa01000829	0.134	0.151	3.909	1.398	1.163	8.09	5.295	4.84933	37.188	3.282	15.573	18.681	1.98	1.203	1.315	1.49933	7.757	0.997	0.905	3.21967	3.46876	13.3627	2.1474	1.697	0.574	1.826	1.36567	4.969	6.985	16.153	9.369	0.284	0	250.963	6.402	8.72	1.939	5.687	75.024	36.597	150.504	87.375	6.86039	15.364	0	0	0	Ssa04014999,f-box protein,"F-box,PP2"
Ssa13008468	0.327	0.336	0.856	0.506333	0.452	1.477	3.339	1.756	0.404	1.157	1.603	1.05467	0.389	0.73	0.956	0.691667	0.438	0.291	0.318	0.349	3.46807	2.08295	0.504578	0.498	0.536	0.297	0.443667	0.249	0.132	0.187	0.189333	0.599	0.322	0.743	0.711	0.596	0.414	0.573667	0.895	0.852	1.011	0.919333	0.426747	1.60256	146.346	109.554	111.177	Ssa08023376,"SANT SWI3, ADA2, N-CoR and TFIIIB'' DNA-binding domains",Myb_DNA-binding
Ssa12006718	2.631	1.636	3.144	2.47033	4.905	8.197	12.595	8.56567	5.175	8.088	8.723	7.32867	5.38	6.485	8.853	6.906	5.614	4.013	3.437	4.35467	3.46741	2.96667	0.630563	1.45	1.668	1.52	1.546	0.776	0.825	0.911	0.837333	5.089	3.855	1.602	1.942	1.376	1.359	1.559	2.018	1.978	1.207	1.73433	0.541613	1.11247	28.786	25.894	34.555	Ssa06019785,transcription factor,"Myb_CC_LHEQLE,Myb_DNA-binding"
Ssa06018057	1.998	0.144	15.772	5.97133	3.177	30.644	28.252	20.691	20.837	58.768	79.097	52.9007	9.046	16.048	24.674	16.5893	7.43	4.831	1.676	4.64567	3.46506	8.8591	0.280039	9.352	1.349	0.134	3.61167	0.153	0.325	1.443	0.640333	0.135	8.596	6.613	0.442	1.363	0.568	0.791	0	0.276	0.396	0.224	0.177296	0.283186	0.278	0.962	1.014	Ssa09025530,Myosin heavy chain kinase,WD40
Ssa08022804	0	0	0.14	0.0466667	0	0	0.485	0.161667	0	0	0	0	0	0	0	0	0	0	0	0	3.46429	0	#DIV/0!	0	0	0	0	0	0	0	0	0	0	0	0	0	0	0	0	0	0	0	#DIV/0!	#DIV/0!	7.339	5.798	3.621	Ssa03013976,Serine threonine-protein kinase STN7,Pkinase
Ssa03012893	0	0	0.056	0.0186667	0	0	0.194	0.0646667	1.988	0	0.102	0.696667	0	0.045	0.059	0.0346667	0	0.061	0.295	0.118667	3.46429	37.3214	3.42308	0.059	0	0	0.0196667	0	0	0	0	0	0	0	0	0	0	0	0.204	0.496	0.366	0.355333	0	#DIV/0!	0.823	5.729	3.063	Ssa03013496,ARABIDILLO 1-like,"Arm,F-box-like"
Ssa02011062	0.266	0.383	0.603	0.417333	0.526	0.826	2.982	1.44467	1.102	1.097	1.371	1.19	0.675	1.792	1.265	1.244	1.231	1.162	1.324	1.239	3.46166	2.85144	0.995981	0.11	0.114	0.064	0.096	0.102	0.062	0.015	0.0596667	0.321	0.275	0.151	0.164	0.158	0.067	0.129667	0.289	0.17	0.158	0.205667	0.621528	1.58612	0	0	0	Ssa08022756,-,-
Ssa12007329	2.292	1.927	3.389	2.536	8.179	10.564	7.593	8.77867	4.554	10.286	9.929	8.25633	5.946	5.585	6.166	5.899	7.952	6.754	5.497	6.73433	3.46162	3.25565	1.14161	7.482	4.962	3.776	5.40667	1.085	1.154	2.58	1.60633	3.643	4.291	6.721	4.157	3.687	6.177	4.67367	2.352	1.239	1.712	1.76767	0.297102	0.378218	31.203	15.412	18.18	Ssa09024406,-,-
Ssa05017098	0	0	0.182	0.0606667	0	0	0.63	0.21	0	0	0	0	0	0.073	0.024	0.0323333	0	0	0.239	0.0796667	3.46154	0	2.46392	0	0	0	0	0	0	0	0	0	0.055	0	0	0	0	0	0	0	0	0	#DIV/0!	#DIV/0!	32.003	19.553	25.978	Ssa01000302,WD40-like Beta Propeller Repeat,"DPPIV_N,PD40"
Ssa04015430	5.644	1.443	9.339	5.47533	8.935	21.624	26.299	18.9527	2.087	6.888	7.087	5.354	0.879	0.863	3.025	1.589	1.298	0.969	0.385	0.884	3.46146	0.97784	0.556325	5.891	7.124	1.169	4.728	1.672	1.267	1.494	1.47767	1.731	6.238	8.84	2.131	3.275	0.215	1.87367	0.709	0.819	1.148	0.892	0.312535	0.476072	2.208	1.397	4.162	Ssa10004797,"Thioredoxin-like 1-2, chloroplastic",Thioredoxin
Ssa05017368	0.091	0.068	0.312	0.157	0.263	0.47	0.897	0.543333	0.048	0.677	0.921	0.548667	0.034	0.502	0.243	0.259667	0.057	0.085	0.204	0.115333	3.46072	3.49469	0.444159	0.219	0.156	0.032	0.135667	0.072	0.231	0.228	0.177	0.384	0.437	0.172	0.126	0.152	1.045	0.441	0.502	0.229	0.282	0.337667	1.30467	0.765684	1.77	0.529	0.202	Ssa07020977,"EF-hand, calcium binding motif",EF-hand_5
Ssa01000706	0.088	0	0.038	0.042	0.115	0.19	0.131	0.145333	0	0.047	0.069	0.0386667	0.1	0	0.079	0.0596667	0.042	0.041	0	0.0276667	3.46032	0.920635	0.463687	0.04	0.038	0.138	0.072	0	0	0.055	0.0183333	0.047	0	0.1	0	0	0.049	0.0163333	0	0	0.041	0.0136667	0.25463	0.836735	1.057	1.041	0.943	Ssa08023887,Belongs to the TRAFAC class myosin-kinesin ATPase superfamily. Kinesin family,"DUF3490,Kinesin"
Ssa13009393	2.11	1.501	3.96	2.52367	7.132	9.244	9.816	8.73067	0.998	5.165	5.797	3.98667	0.356	1.459	1.605	1.14	1.262	0.582	0.176	0.673333	3.45952	1.57971	0.590643	0.425	0.469	0.164	0.352667	0.094	0.199	0	0.0976667	0.083	0.242	0.444	0.406	0.157	0	0.187667	0.324	0.253	0.509	0.362	0.276938	1.92895	10.209	6.621	10.933	Ssa11005357,bifunctional UDP-glucose 4-epimerase and UDP-xylose 4-epimerase,GDP_Man_Dehyd
Ssa09024377	5	2.95	6.566	4.83867	20.516	20.901	8.79	16.7357	4.578	4.075	5.049	4.56733	5.22	3.017	5.063	4.43333	7.051	8.694	3.805	6.51667	3.45874	0.943924	1.46992	1.384	1.831	0.869	1.36133	0.839	1.257	1.281	1.12567	1.181	2.432	3.219	1.656	0.99	0.426	1.024	0.926	0.723	0.889	0.846	0.826885	0.826172	55.382	72.931	71.212	Ssa07020497,ER membrane protein complex subunit 8 9 homolog,UPF0172
Ssa10004452	0.36	0.523	1.222	0.701667	0.834	2.546	3.899	2.42633	1.286	1.846	2.142	1.758	0.897	1.422	2.327	1.54867	0.798	0.591	0.773	0.720667	3.45796	2.50546	0.465347	0.171	0.103	0.054	0.109333	0.041	0.196	0.237	0.158	0.091	0.195	0.097	0.214	0.223	0.076	0.171	0.036	0.037	0.096	0.0563333	1.44512	0.329435	461.205	259.09	381.733	Ssa02011908,-,-
Ssa08023526	0.042	0.048	0	0.03	0.091	0.054	0.166	0.103667	0.034	0.135	0.148	0.105667	0.072	0.087	0	0.053	0.04	0.02	0.024	0.028	3.45556	3.52222	0.528302	0	0	0.022	0.00733333	0	0	0	0	0.022	0.065	0	0	0.021	0.023	0.0146667	0	0	0.02	0.00666667	0	0.454545	19.231	4.95	4.663	Ssa02011820,-,-
Ssa03012539	2.684	1.737	1.885	2.102	4.034	7.025	10.73	7.263	1.763	12.741	13.416	9.30667	1.543	2.919	4.732	3.06467	1.129	1.341	0.803	1.091	3.45528	4.42753	0.355993	1.354	0.504	0.249	0.702333	0.201	0.427	0.422	0.35	4.546	15.578	1.365	1.948	1.737	0.95	1.545	0.726	0.559	0.286	0.523667	0.498339	0.338943	4.203	6.191	6.235	Ssa09025376,Vacuolar membrane protein,EamA
Ssa13008780	0.038	0.128	0.195	0.120333	0.263	0.685	0.299	0.415667	0.965	0.483	1.239	0.895667	0.129	0.235	0.472	0.278667	0.431	0.106	0.341	0.292667	3.45429	7.44321	1.05024	0.171	0.065	0.198	0.144667	1.041	1.395	1.71	1.382	0.04	0.078	0.386	0.157	0.454	1.6	0.737	1.177	0.367	0.703	0.749	9.553	1.01628	7.267	7.145	7.909	Ssa08023530,F-box LRR-repeat protein,"F-box,FIST,FIST_C"
Ssa03013534	0.038	0.128	0.195	0.120333	0.263	0.685	0.299	0.415667	0.965	0.483	1.298	0.915333	0.129	0.235	0.472	0.278667	0.431	0.106	0.341	0.292667	3.45429	7.60665	1.05024	0.171	0.065	0.198	0.144667	1.131	1.539	1.71	1.46	0.12	0.078	0.472	0.118	0.454	1.642	0.738	1.137	0.367	0.774	0.759333	10.0922	1.02891	0.139	0.111	0.127	Ssa04014592,Belongs to the peptidase S10 family,Peptidase_S10
Ssa01000481	0.052	0.047	0.053	0.0506667	0.216	0.125	0.184	0.175	0.116	0.243	0.275	0.211333	0.153	0.644	0.444	0.413667	0.088	0.125	0.023	0.0786667	3.45395	4.17105	0.190169	0.075	0.16	0.228	0.154333	0.099	0.04	0.13	0.0896667	0.318	0.31	0.059	0.43	0.342	0.127	0.299667	0.172	0.157	0.202	0.177	0.580994	0.590656	0.713	2.863	1.299	Ssa08022607,Fanconi-associated nuclease 1 homolog,"HIRAN,VRR_NUC"
Ssa13008595	0	0.089	0.203	0.0973333	0	0.023	0.985	0.336	0.042	0.894	0.921	0.619	0.179	0.272	0.328	0.259667	0.299	0.024	0.03	0.117667	3.45205	6.35959	0.453145	0.047	0.045	0.083	0.0583333	0	0.033	0.033	0.022	0.278	0.135	0.387	0.3	0.657	1.197	0.718	0.136	0.34	0.268	0.248	0.377143	0.345404	9.113	14.978	14.64	Ssa04015309,"The coatomer is a cytosolic protein complex that binds to dilysine motifs and reversibly associates with Golgi non- clathrin-coated vesicles, which further mediate biosynthetic protein transport from the ER, via the Golgi up to the trans Golgi network. Coatomer complex is required for budding from Golgi membranes, and is essential for the retrograde Golgi-to-ER transport of dilysine-…
Ssa06018126	0	0	0.031	0.0103333	0	0	0.107	0.0356667	0	0	0.056	0.0186667	0	0.025	0	0.00833333	0.034	0	0.081	0.0383333	3.45161	1.80645	4.6	0	0	0	0	0	0	0	0	0	0.037	0	0	0	0	0	0	0	0	0	#DIV/0!	#DIV/0!	0.095	0	0.174	Ssa02010894,-,-
Ssa04014658	0	0	0.04	0.0133333	0	0	0.138	0.046	0.149	0.05	0.109	0.102667	0.053	0	0.042	0.0316667	0.044	0	0.105	0.0496667	3.45	7.7	1.56842	0.084	0.04	0.049	0.0576667	0	0.059	0.059	0.0393333	0.346	0.192	0	0.048	0	0.156	0.068	0	0.05	0.087	0.0456667	0.682081	0.671569	0	0	0	Ssa02010728,Arabidopsis protein of unknown function,DUF241
[truncated: 22,494 more rows]

## Sheet: Up regulated genes in pulvinus
	T0			SUM T0	T1			SUM T1	T2			SUMT2	T3			SUM	T4 dark			SUM				T0				T1				T2			T3				T4 dark			SUM
[truncated: 890 more rows]

## Sheet: Pulvinus-Leaflets
	T0 5：30			SUM T0	T1 7：30			SUM T1	T2 9：30			SUMT2	T3 11：30			SUM	T4 dark 11：30			SUM				T0				T1				T2			T3				T4 dark			SUM
[truncated: 171 more rows]

[truncated: 4 more sheets: Pulvinus T1-T4, Upregulated genes pulvinus only, Down-regulated genes pulvinus, Gene id of coexpression network]
