# Supplementary material for: A telomere-to-telomere genome of raintree (Samanea Saman) reveals its ecological adaptation characteristics of nyctinastic movement and symbiotic nitrogen fixation
Source: Research Square preprint supplement (doi:10.21203/rs.3.rs-7165529/v1), 2025-08-13
Supplement: Supplementary file 2 [file 3336a17b2083c311869e1b7e.xlsx]

## Sheet: Genome assembly
Genome	Samanea saman
Ploidy	2n = 26
Estimated genome size (Mb)	530
Assembled genome size (Mb)	539.53
Genomic heterozygosity (%)	0.253
Contig N50 (Mb)	42.86
Number of contigs	13
Number of chromosomes	13
Repeat sequence content (%)	58.51
GC content (%)	32.85
Number of gene models	25997
Genome BUSCOs (%)	98.8
Gene BUSCO (%)	98.8

## Sheet: Gene annotation
Wed Apr 16 07:48:03 2025
Annotation of genome raintree (Samanea Saman)
#query	seed_ortholog	evalue	score	eggNOG_OGs	max_annot_lvl	COG_category	Description	Preferred_name	GOs	EC	KEGG_ko	KEGG_Pathway	KEGG_Module	KEGG_Reaction	KEGG_rclass	BRITE	KEGG_TC	CAZy	PFAMs
Ssa01000001.t1	3847.GLYMA18G48020.2	0	1165	KOG1213@1|root,KOG1213@2759|Eukaryota,37HZJ@33090|Viridiplantae,3G7MU@35493|Streptophyta,4JFXP@91835|fabids	35493|Streptophyta	D	Conserved region of Rad21 / Rec8 like protein	-	GO:0000228,GO:0000278,GO:0000793,GO:0000794,GO:0000798,GO:0000819,GO:0003674,GO:0003682,GO:0005488,GO:0005575,GO:0005622,GO:0005623,GO:0005634,GO:0005694,GO:0005730,GO:0006139,GO:0006259,GO:0006281,GO:0006302,GO:0006725,GO:0006807,GO:0006950,GO:0006974,GO:0006996,GO:0007049,GO:0007059,GO:0007062,GO:0007275,GO:0008150,GO:0008152,GO:0008278,GO:0009553,GO:0009555,GO:0009561,GO:0009987,GO:0016043,GO:…	-	ko:K06670	ko04110,ko04111,map04110,map04111	-	-	-	ko00000,ko00001,ko03036	-	-	Rad21_Rec8,Rad21_Rec8_N
Ssa01000001.t2	3847.GLYMA18G48020.2	0	1253	KOG1213@1|root,KOG1213@2759|Eukaryota,37HZJ@33090|Viridiplantae,3G7MU@35493|Streptophyta,4JFXP@91835|fabids	35493|Streptophyta	D	Conserved region of Rad21 / Rec8 like protein	-	GO:0000228,GO:0000278,GO:0000793,GO:0000794,GO:0000798,GO:0000819,GO:0003674,GO:0003682,GO:0005488,GO:0005575,GO:0005622,GO:0005623,GO:0005634,GO:0005694,GO:0005730,GO:0006139,GO:0006259,GO:0006281,GO:0006302,GO:0006725,GO:0006807,GO:0006950,GO:0006974,GO:0006996,GO:0007049,GO:0007059,GO:0007062,GO:0007275,GO:0008150,GO:0008152,GO:0008278,GO:0009553,GO:0009555,GO:0009561,GO:0009987,GO:0016043,GO:…	-	ko:K06670	ko04110,ko04111,map04110,map04111	-	-	-	ko00000,ko00001,ko03036	-	-	Rad21_Rec8,Rad21_Rec8_N
Ssa01000002.t1	3885.XP_007139709.1	4.06e-145	416	KOG4827@1|root,KOG4827@2759|Eukaryota,37I40@33090|Viridiplantae,3GEAN@35493|Streptophyta,4JE7I@91835|fabids	35493|Streptophyta	S	ER membrane protein complex subunit	-	-	-	-	-	-	-	-	-	-	-	-
Ssa01000003.t1	102107.XP_008218475.1	1.06e-100	305	KOG2369@1|root,KOG2369@2759|Eukaryota,37QYP@33090|Viridiplantae,3GA3T@35493|Streptophyta,4JI2W@91835|fabids	35493|Streptophyta	I	Phospholipase A(1)	-	-	3.1.1.32	ko:K22389	ko00564,ko00592,ko01100,ko01110,map00564,map00592,map01100,map01110	-	R01316,R02054,R04034,R07860	RC00020,RC00041	ko00000,ko00001,ko01000	-	-	LCAT
Ssa01000004.t1	85681.XP_006428685.1	1.36e-21	92.8	KOG2369@1|root,KOG2369@2759|Eukaryota,37QYP@33090|Viridiplantae,3GA3T@35493|Streptophyta	35493|Streptophyta	I	Phospholipase A(1)	-	-	3.1.1.32	ko:K22389	ko00564,ko00592,ko01100,ko01110,map00564,map00592,map01100,map01110	-	R01316,R02054,R04034,R07860	RC00020,RC00041	ko00000,ko00001,ko01000	-	-	LCAT
Ssa01000005.t1	3988.XP_002514829.1	0	1168	COG0449@1|root,KOG1268@2759|Eukaryota,37JZC@33090|Viridiplantae,3GFCM@35493|Streptophyta,4JFBX@91835|fabids	35493|Streptophyta	M	aminotransferase isomerizing	GFPT2	GO:0003674,GO:0003824,GO:0004360,GO:0006002,GO:0006040,GO:0006047,GO:0006139,GO:0006464,GO:0006486,GO:0006487,GO:0006725,GO:0006793,GO:0006796,GO:0006807,GO:0008150,GO:0008152,GO:0008483,GO:0009058,GO:0009059,GO:0009100,GO:0009101,GO:0009225,GO:0009987,GO:0016740,GO:0016769,GO:0019538,GO:0019637,GO:0034641,GO:0034645,GO:0036211,GO:0043170,GO:0043412,GO:0043413,GO:0044237,GO:0044238,GO:0044249,GO:…	2.6.1.16	ko:K00820	ko00250,ko00520,ko01100,ko01130,ko04931,map00250,map00520,map01100,map01130,map04931	-	R00768	RC00010,RC00163,RC02752	ko00000,ko00001,ko01000,ko01002	-	-	GATase_6,SIS
Ssa01000005.t2	3988.XP_002514829.1	0	1163	COG0449@1|root,KOG1268@2759|Eukaryota,37JZC@33090|Viridiplantae,3GFCM@35493|Streptophyta,4JFBX@91835|fabids	35493|Streptophyta	M	aminotransferase isomerizing	GFPT2	GO:0003674,GO:0003824,GO:0004360,GO:0006002,GO:0006040,GO:0006047,GO:0006139,GO:0006464,GO:0006486,GO:0006487,GO:0006725,GO:0006793,GO:0006796,GO:0006807,GO:0008150,GO:0008152,GO:0008483,GO:0009058,GO:0009059,GO:0009100,GO:0009101,GO:0009225,GO:0009987,GO:0016740,GO:0016769,GO:0019538,GO:0019637,GO:0034641,GO:0034645,GO:0036211,GO:0043170,GO:0043412,GO:0043413,GO:0044237,GO:0044238,GO:0044249,GO:…	2.6.1.16	ko:K00820	ko00250,ko00520,ko01100,ko01130,ko04931,map00250,map00520,map01100,map01130,map04931	-	R00768	RC00010,RC00163,RC02752	ko00000,ko00001,ko01000,ko01002	-	-	GATase_6,SIS
Ssa01000006.t2	3847.GLYMA10G31430.1	1.12e-266	739	KOG1339@1|root,KOG1339@2759|Eukaryota,37NJ4@33090|Viridiplantae,3G885@35493|Streptophyta,4JF11@91835|fabids	35493|Streptophyta	O	Belongs to the peptidase A1 family	-	GO:0003674,GO:0003824,GO:0004175,GO:0004190,GO:0005575,GO:0005623,GO:0005886,GO:0006508,GO:0006807,GO:0008150,GO:0008152,GO:0008233,GO:0009056,GO:0009057,GO:0016020,GO:0016787,GO:0019538,GO:0030163,GO:0031224,GO:0031225,GO:0031226,GO:0043170,GO:0044238,GO:0044425,GO:0044459,GO:0044464,GO:0046658,GO:0070001,GO:0070011,GO:0071704,GO:0071944,GO:0140096,GO:1901564,GO:1901565,GO:1901575	-	-	-	-	-	-	-	-	-	TAXi_C,TAXi_N
Ssa01000006.t3	3847.GLYMA10G31430.1	5.64e-242	676	KOG1339@1|root,KOG1339@2759|Eukaryota,37NJ4@33090|Viridiplantae,3G885@35493|Streptophyta,4JF11@91835|fabids	35493|Streptophyta	O	Belongs to the peptidase A1 family	-	GO:0003674,GO:0003824,GO:0004175,GO:0004190,GO:0005575,GO:0005623,GO:0005886,GO:0006508,GO:0006807,GO:0008150,GO:0008152,GO:0008233,GO:0009056,GO:0009057,GO:0016020,GO:0016787,GO:0019538,GO:0030163,GO:0031224,GO:0031225,GO:0031226,GO:0043170,GO:0044238,GO:0044425,GO:0044459,GO:0044464,GO:0046658,GO:0070001,GO:0070011,GO:0071704,GO:0071944,GO:0140096,GO:1901564,GO:1901565,GO:1901575	-	-	-	-	-	-	-	-	-	TAXi_C,TAXi_N
Ssa01000006.t1	3847.GLYMA10G31430.1	1.04e-266	739	KOG1339@1|root,KOG1339@2759|Eukaryota,37NJ4@33090|Viridiplantae,3G885@35493|Streptophyta,4JF11@91835|fabids	35493|Streptophyta	O	Belongs to the peptidase A1 family	-	GO:0003674,GO:0003824,GO:0004175,GO:0004190,GO:0005575,GO:0005623,GO:0005886,GO:0006508,GO:0006807,GO:0008150,GO:0008152,GO:0008233,GO:0009056,GO:0009057,GO:0016020,GO:0016787,GO:0019538,GO:0030163,GO:0031224,GO:0031225,GO:0031226,GO:0043170,GO:0044238,GO:0044425,GO:0044459,GO:0044464,GO:0046658,GO:0070001,GO:0070011,GO:0071704,GO:0071944,GO:0140096,GO:1901564,GO:1901565,GO:1901575	-	-	-	-	-	-	-	-	-	TAXi_C,TAXi_N
Ssa01000007.t1	3983.cassava4.1_012588m	6e-97	292	2CN2V@1|root,2QTKW@2759|Eukaryota,37R68@33090|Viridiplantae,3GD3Z@35493|Streptophyta,4JFGR@91835|fabids	35493|Streptophyta	S	Uncharacterized conserved protein (DUF2358)	-	-	-	-	-	-	-	-	-	-	-	DUF2358
Ssa01000007.t2	3983.cassava4.1_012588m	1.06e-122	359	2CN2V@1|root,2QTKW@2759|Eukaryota,37R68@33090|Viridiplantae,3GD3Z@35493|Streptophyta,4JFGR@91835|fabids	35493|Streptophyta	S	Uncharacterized conserved protein (DUF2358)	-	-	-	-	-	-	-	-	-	-	-	DUF2358
Ssa01000008.t1	3847.GLYMA18G47810.1	5.29e-262	728	COG0631@1|root,KOG0698@2759|Eukaryota,37K1F@33090|Viridiplantae,3G7HE@35493|Streptophyta,4JDJF@91835|fabids	35493|Streptophyta	T	phosphatase 2c	-	GO:0003674,GO:0003824,GO:0004721,GO:0005575,GO:0005622,GO:0005623,GO:0005634,GO:0005886,GO:0006464,GO:0006470,GO:0006793,GO:0006796,GO:0006807,GO:0008150,GO:0008152,GO:0009987,GO:0016020,GO:0016311,GO:0016787,GO:0016788,GO:0016791,GO:0019538,GO:0036211,GO:0042578,GO:0043170,GO:0043226,GO:0043227,GO:0043229,GO:0043231,GO:0043412,GO:0044237,GO:0044238,GO:0044260,GO:0044267,GO:0044424,GO:0044464,GO:…	-	-	-	-	-	-	-	-	-	PP2C
Ssa01000009.t1	3847.GLYMA18G47790.1	0	956	COG0590@1|root,KOG1018@2759|Eukaryota,37JAQ@33090|Viridiplantae,3GE1V@35493|Streptophyta,4JMJM@91835|fabids	35493|Streptophyta	F	riboflavin biosynthesis protein	-	GO:0003674,GO:0003824,GO:0004159,GO:0005575,GO:0005622,GO:0005623,GO:0005737,GO:0006139,GO:0006725,GO:0006807,GO:0008150,GO:0008152,GO:0009451,GO:0009507,GO:0009536,GO:0009987,GO:0016070,GO:0016491,GO:0016627,GO:0016628,GO:0016787,GO:0016798,GO:0016799,GO:0034641,GO:0043170,GO:0043226,GO:0043227,GO:0043229,GO:0043231,GO:0043412,GO:0044237,GO:0044238,GO:0044424,GO:0044444,GO:0044464,GO:0046483,GO:…	1.1.1.193,3.5.4.26	ko:K11752	ko00740,ko01100,ko01110,ko02024,map00740,map01100,map01110,map02024	M00125	R03458,R03459	RC00204,RC00933	ko00000,ko00001,ko00002,ko01000	-	-	DUF1768,RibD_C,dCMP_cyt_deam_1
Ssa01000010.t1	3847.GLYMA18G47520.2	3.77e-213	593	arCOG06245@1|root,2QRG2@2759|Eukaryota,37S1V@33090|Viridiplantae,3GASZ@35493|Streptophyta,4JJR5@91835|fabids	35493|Streptophyta	S	UDP-arabinopyranose mutase	-	GO:0003674,GO:0003824,GO:0005575,GO:0005622,GO:0005623,GO:0005737,GO:0005794,GO:0005829,GO:0005911,GO:0006139,GO:0006725,GO:0006793,GO:0006807,GO:0006950,GO:0006970,GO:0008150,GO:0008152,GO:0009225,GO:0009506,GO:0009628,GO:0009651,GO:0009832,GO:0009987,GO:0012505,GO:0016853,GO:0016866,GO:0030054,GO:0033356,GO:0034641,GO:0042546,GO:0043226,GO:0043227,GO:0043229,GO:0043231,GO:0044085,GO:0044237,GO:…	5.4.99.30	ko:K13379	ko00520,map00520	-	R09009	RC02396	ko00000,ko00001,ko01000,ko01003	-	GT75	RGP
Ssa01000011.t1	3885.XP_007139749.1	6.84e-41	136	2DZTN@1|root,2S7AF@2759|Eukaryota,37WWA@33090|Viridiplantae,3GM6B@35493|Streptophyta,4JQUC@91835|fabids	35493|Streptophyta	-	-	-	-	-	-	-	-	-	-	-	-	-	-
Ssa01000012.t1	981085.XP_010111046.1	5.97e-13	75.5	2DBK1@1|root,2S5I7@2759|Eukaryota,37WJS@33090|Viridiplantae,3GJ45@35493|Streptophyta,4JQNG@91835|fabids	35493|Streptophyta	-	-	-	-	-	-	-	-	-	-	-	-	-	-
Ssa01000013.t1	3847.GLYMA20G36200.1	3.73e-247	681	COG1537@1|root,KOG2869@2759|Eukaryota,37QWC@33090|Viridiplantae,3G8VM@35493|Streptophyta,4JIHG@91835|fabids	35493|Streptophyta	J	May function in recognizing stalled ribosomes and triggering endonucleolytic cleavage of the mRNA, a mechanism to release non-functional ribosomes and degrade damaged mRNAs	-	GO:0000956,GO:0003674,GO:0005488,GO:0005575,GO:0005622,GO:0005623,GO:0005737,GO:0006139,GO:0006401,GO:0006402,GO:0006412,GO:0006518,GO:0006725,GO:0006807,GO:0006996,GO:0008150,GO:0008152,GO:0009056,GO:0009057,GO:0009058,GO:0009059,GO:0009892,GO:0009987,GO:0010467,GO:0010468,GO:0010605,GO:0010629,GO:0016043,GO:0016070,GO:0016071,GO:0016072,GO:0016075,GO:0019222,GO:0019439,GO:0019538,GO:0022411,GO:…	-	ko:K06965	ko03015,map03015	-	-	-	ko00000,ko00001	-	-	eRF1_1,eRF1_2,eRF1_3
Ssa01000015.t1	3827.XP_004495541.1	0	1300	KOG1243@1|root,KOG1243@2759|Eukaryota,37KAP@33090|Viridiplantae,3G7N5@35493|Streptophyta,4JHCI@91835|fabids	35493|Streptophyta	T	inactive serine threonine-protein kinase	-	GO:0005575,GO:0005622,GO:0005623,GO:0005813,GO:0005815,GO:0005856,GO:0015630,GO:0043226,GO:0043228,GO:0043229,GO:0043232,GO:0044422,GO:0044424,GO:0044430,GO:0044446,GO:0044464	-	ko:K08876	-	-	-	-	ko00000,ko01001,ko03016	-	-	Pkinase,Pkinase_Tyr
Ssa01000016.t1	29730.Gorai.012G029000.1	3.9e-181	512	28J8N@1|root,2QS1X@2759|Eukaryota,37HEN@33090|Viridiplantae,3GCG1@35493|Streptophyta	35493|Streptophyta	U	May act as a component of the auxin efflux carrier	-	GO:0003674,GO:0005215,GO:0005575,GO:0005622,GO:0005623,GO:0005737,GO:0005783,GO:0005886,GO:0006810,GO:0008150,GO:0009914,GO:0009926,GO:0009966,GO:0010252,GO:0010315,GO:0010329,GO:0010646,GO:0010817,GO:0010928,GO:0012505,GO:0015562,GO:0016020,GO:0022857,GO:0023051,GO:0042592,GO:0043226,GO:0043227,GO:0043229,GO:0043231,GO:0044424,GO:0044444,GO:0044464,GO:0048583,GO:0048878,GO:0050789,GO:0050794,GO:…	-	ko:K13947	-	-	-	-	ko00000,ko02000	2.A.69.1	-	Mem_trans
Ssa01000017.t1	3847.GLYMA20G36170.1	3.51e-227	627	KOG2778@1|root,KOG2778@2759|Eukaryota,37JJG@33090|Viridiplantae,3G9KD@35493|Streptophyta,4JEZK@91835|fabids	35493|Streptophyta	O	Ubiquitin carboxyl-terminal hydrolase	-	GO:0000228,GO:0000785,GO:0000790,GO:0003674,GO:0003824,GO:0004843,GO:0004857,GO:0004866,GO:0005488,GO:0005575,GO:0005622,GO:0005623,GO:0005634,GO:0005654,GO:0005694,GO:0005737,GO:0005739,GO:0005829,GO:0006464,GO:0006508,GO:0006807,GO:0007275,GO:0008150,GO:0008152,GO:0008233,GO:0008234,GO:0009653,GO:0009892,GO:0009894,GO:0009987,GO:0010016,GO:0010466,GO:0010605,GO:0010951,GO:0016579,GO:0016787,GO:…	3.4.19.12	ko:K05610	-	-	-	-	ko00000,ko01000,ko01002,ko04121	-	-	Peptidase_C12
Ssa01000018.t1	3847.GLYMA09G38650.3	2.52e-188	536	COG5063@1|root,KOG1677@2759|Eukaryota,37MG1@33090|Viridiplantae,3GD6N@35493|Streptophyta,4JM26@91835|fabids	35493|Streptophyta	S	Zinc finger CCCH domain-containing protein ZFN-like	-	GO:0003674,GO:0003676,GO:0003677,GO:0003723,GO:0003729,GO:0003824,GO:0004518,GO:0005488,GO:0005515,GO:0005575,GO:0005622,GO:0005623,GO:0005737,GO:0005829,GO:0006139,GO:0006417,GO:0006725,GO:0006807,GO:0008150,GO:0008152,GO:0009889,GO:0009890,GO:0009892,GO:0009987,GO:0010313,GO:0010468,GO:0010556,GO:0010558,GO:0010605,GO:0010608,GO:0010629,GO:0016787,GO:0016788,GO:0017148,GO:0019222,GO:0031323,GO:…	-	-	-	-	-	-	-	-	-	zf-CCCH
Ssa01000019.t1	3641.EOY09889	5.49e-146	418	COG2119@1|root,KOG2881@2759|Eukaryota,37Q25@33090|Viridiplantae,3GG4S@35493|Streptophyta	35493|Streptophyta	S	GDT1-like protein	-	GO:0005575,GO:0005622,GO:0005623,GO:0005737,GO:0005794,GO:0012505,GO:0043226,GO:0043227,GO:0043229,GO:0043231,GO:0044424,GO:0044444,GO:0044464	-	-	-	-	-	-	-	-	-	UPF0016
Ssa01000020.t1	3885.XP_007139727.1	4.07e-110	320	COG2365@1|root,KOG1572@2759|Eukaryota,37M0Q@33090|Viridiplantae,3GGSP@35493|Streptophyta,4JGEB@91835|fabids	35493|Streptophyta	V	Tyrosine-protein phosphatase	-	GO:0003674,GO:0003824,GO:0004721,GO:0004725,GO:0005575,GO:0005622,GO:0005623,GO:0005634,GO:0005737,GO:0006464,GO:0006470,GO:0006793,GO:0006796,GO:0006807,GO:0008150,GO:0008152,GO:0009987,GO:0016311,GO:0016787,GO:0016788,GO:0016791,GO:0019538,GO:0035335,GO:0036211,GO:0042578,GO:0043170,GO:0043226,GO:0043227,GO:0043229,GO:0043231,GO:0043412,GO:0044237,GO:0044238,GO:0044260,GO:0044267,GO:0044424,GO:…	3.1.3.48	ko:K18045	-	-	-	-	ko00000,ko01000,ko01009	-	-	Y_phosphatase2
Ssa01000021.t1	3827.XP_004492838.1	1.49e-135	401	KOG4200@1|root,KOG4200@2759|Eukaryota,37RJ2@33090|Viridiplantae,3GFHG@35493|Streptophyta,4JK04@91835|fabids	35493|Streptophyta	S	Putative adipose-regulatory protein (Seipin)	-	GO:0000003,GO:0003006,GO:0005575,GO:0005622,GO:0005623,GO:0005737,GO:0005783,GO:0006996,GO:0007275,GO:0008150,GO:0009791,GO:0009846,GO:0009856,GO:0009987,GO:0010154,GO:0010162,GO:0010344,GO:0010431,GO:0010876,GO:0012505,GO:0016043,GO:0019915,GO:0021700,GO:0022414,GO:0022607,GO:0022611,GO:0032501,GO:0032502,GO:0032504,GO:0033036,GO:0034389,GO:0043226,GO:0043227,GO:0043229,GO:0043231,GO:0043900,GO:…	-	ko:K19365	-	-	-	-	ko00000	-	-	Seipin
Ssa01000022.t1	3750.XP_008350672.1	1.04e-161	458	COG1443@1|root,KOG0142@2759|Eukaryota,37QKP@33090|Viridiplantae,3GAAJ@35493|Streptophyta,4JKI7@91835|fabids	35493|Streptophyta	Q	Isopentenyl-diphosphate Delta-isomerase	-	-	5.3.3.2	ko:K01823	ko00900,ko01100,ko01110,ko01130,map00900,map01100,map01110,map01130	M00095,M00096,M00364,M00365,M00366,M00367	R01123	RC00455	ko00000,ko00001,ko00002,ko01000	-	-	NUDIX
Ssa01000022.t2	3750.XP_008350672.1	1.8e-161	458	COG1443@1|root,KOG0142@2759|Eukaryota,37QKP@33090|Viridiplantae,3GAAJ@35493|Streptophyta,4JKI7@91835|fabids	35493|Streptophyta	Q	Isopentenyl-diphosphate Delta-isomerase	-	-	5.3.3.2	ko:K01823	ko00900,ko01100,ko01110,ko01130,map00900,map01100,map01110,map01130	M00095,M00096,M00364,M00365,M00366,M00367	R01123	RC00455	ko00000,ko00001,ko00002,ko01000	-	-	NUDIX
Ssa01000023.t1	3885.XP_007139724.1	3.3e-280	768	KOG2297@1|root,KOG2297@2759|Eukaryota,37NYF@33090|Viridiplantae,3GEZX@35493|Streptophyta,4JGAR@91835|fabids	35493|Streptophyta	J	Basic leucine zipper and W2 domain-containing protein	-	-	-	-	-	-	-	-	-	-	-	W2
Ssa01000024.t1	3847.GLYMA20G36226.1	2.96e-110	328	28IYG@1|root,2QRA4@2759|Eukaryota,37KU6@33090|Viridiplantae,3GFCK@35493|Streptophyta,4JENW@91835|fabids	35493|Streptophyta	S	f-box protein	-	GO:0000003,GO:0003006,GO:0003674,GO:0005488,GO:0007275,GO:0008150,GO:0009790,GO:0009791,GO:0009793,GO:0010154,GO:0022414,GO:0030246,GO:0032501,GO:0032502,GO:0048316,GO:0048608,GO:0048731,GO:0048856,GO:0061458	-	-	-	-	-	-	-	-	-	F-box,PP2
Ssa01000025.t1	3827.XP_004494770.1	3.67e-167	490	COG0515@1|root,KOG1187@2759|Eukaryota,37RBN@33090|Viridiplantae,3GFQ7@35493|Streptophyta,4JSI0@91835|fabids	35493|Streptophyta	T	Serine threonine-protein kinase At3g07070-like	-	GO:0000003,GO:0003006,GO:0003674,GO:0003824,GO:0004672,GO:0004674,GO:0004675,GO:0004888,GO:0005575,GO:0005622,GO:0005623,GO:0005737,GO:0005886,GO:0006464,GO:0006468,GO:0006793,GO:0006796,GO:0006807,GO:0006935,GO:0007154,GO:0007165,GO:0007166,GO:0007167,GO:0007178,GO:0008150,GO:0008152,GO:0009605,GO:0009856,GO:0009987,GO:0010183,GO:0016020,GO:0016301,GO:0016310,GO:0016740,GO:0016772,GO:0016773,GO:…	2.7.11.1	ko:K04733	ko04010,ko04064,ko04620,ko04621,ko04624,ko04722,ko05133,ko05140,ko05142,ko05145,ko05152,ko05162,ko05164,map04010,map04064,map04620,map04621,map04624,map04722,map05133,map05140,map05142,map05145,map05152,map05162,map05164	M00686	-	-	ko00000,ko00001,ko00002,ko01000,ko01001	-	-	Pkinase,Pkinase_Tyr
Ssa01000026.t1	3885.XP_007147248.1	2.12e-243	688	COG0515@1|root,KOG1187@2759|Eukaryota,3896D@33090|Viridiplantae,3GY3F@35493|Streptophyta,4JWAU@91835|fabids	35493|Streptophyta	T	Protein kinase domain	-	-	-	-	-	-	-	-	-	-	-	Pkinase
Ssa01000027.t1	3847.GLYMA19G44010.1	9.73e-244	681	28K1H@1|root,2QSFY@2759|Eukaryota,37JQN@33090|Viridiplantae,3GFCZ@35493|Streptophyta,4JJY4@91835|fabids	35493|Streptophyta	S	Belongs to the calycin superfamily. Lipocalin family	VDE	GO:0003674,GO:0003824,GO:0005488,GO:0005515,GO:0005575,GO:0005622,GO:0005623,GO:0005737,GO:0006082,GO:0006629,GO:0006631,GO:0006720,GO:0006721,GO:0006725,GO:0006778,GO:0006807,GO:0006950,GO:0008150,GO:0008152,GO:0009266,GO:0009408,GO:0009507,GO:0009534,GO:0009536,GO:0009579,GO:0009628,GO:0009987,GO:0010028,GO:0015994,GO:0016108,GO:0016116,GO:0016122,GO:0016491,GO:0019752,GO:0019904,GO:0031976,GO:…	1.23.5.1	ko:K09839	ko00906,ko01100,ko01110,map00906,map01100,map01110	-	R07178,R07179,R10055	RC01624,RC03037	ko00000,ko00001,ko01000	-	-	VDE
Ssa01000027.t2	3847.GLYMA19G44010.1	5.37e-225	633	28K1H@1|root,2QSFY@2759|Eukaryota,37JQN@33090|Viridiplantae,3GFCZ@35493|Streptophyta,4JJY4@91835|fabids	35493|Streptophyta	S	Belongs to the calycin superfamily. Lipocalin family	VDE	GO:0003674,GO:0003824,GO:0005488,GO:0005515,GO:0005575,GO:0005622,GO:0005623,GO:0005737,GO:0006082,GO:0006629,GO:0006631,GO:0006720,GO:0006721,GO:0006725,GO:0006778,GO:0006807,GO:0006950,GO:0008150,GO:0008152,GO:0009266,GO:0009408,GO:0009507,GO:0009534,GO:0009536,GO:0009579,GO:0009628,GO:0009987,GO:0010028,GO:0015994,GO:0016108,GO:0016116,GO:0016122,GO:0016491,GO:0019752,GO:0019904,GO:0031976,GO:…	1.23.5.1	ko:K09839	ko00906,ko01100,ko01110,map00906,map01100,map01110	-	R07178,R07179,R10055	RC01624,RC03037	ko00000,ko00001,ko01000	-	-	VDE
Ssa01000028.t1	3750.XP_008388767.1	9.09e-152	442	28NAG@1|root,2QUVX@2759|Eukaryota,37MWU@33090|Viridiplantae,3GFRU@35493|Streptophyta,4JEGU@91835|fabids	35493|Streptophyta	S	Encoded by	-	-	-	-	-	-	-	-	-	-	-	-
Ssa01000029.t1	3827.XP_004494764.1	7.69e-40	139	2E1W5@1|root,2S95V@2759|Eukaryota,37X8G@33090|Viridiplantae,3GJQ7@35493|Streptophyta,4JQ66@91835|fabids	35493|Streptophyta	-	-	-	-	-	-	-	-	-	-	-	-	-	-
Ssa01000031.t2	3885.XP_007147242.1	3e-168	484	KOG0167@1|root,KOG0167@2759|Eukaryota,37I1K@33090|Viridiplantae,3GCSN@35493|Streptophyta,4JJVH@91835|fabids	35493|Streptophyta	S	RING-type E3 ubiquitin transferase	-	GO:0001101,GO:0003674,GO:0003824,GO:0004842,GO:0005102,GO:0005488,GO:0005515,GO:0005575,GO:0005622,GO:0005623,GO:0005634,GO:0005737,GO:0005886,GO:0006464,GO:0006807,GO:0008150,GO:0008152,GO:0009719,GO:0009725,GO:0009737,GO:0009987,GO:0010033,GO:0016020,GO:0016567,GO:0016740,GO:0019538,GO:0019787,GO:0032446,GO:0032870,GO:0033612,GO:0033993,GO:0036211,GO:0042221,GO:0043170,GO:0043226,GO:0043227,GO:…	-	-	-	-	-	-	-	-	-	Arm,U-box
Ssa01000031.t3	3885.XP_007147242.1	9.18e-190	542	KOG0167@1|root,KOG0167@2759|Eukaryota,37I1K@33090|Viridiplantae,3GCSN@35493|Streptophyta,4JJVH@91835|fabids	35493|Streptophyta	S	RING-type E3 ubiquitin transferase	-	GO:0001101,GO:0003674,GO:0003824,GO:0004842,GO:0005102,GO:0005488,GO:0005515,GO:0005575,GO:0005622,GO:0005623,GO:0005634,GO:0005737,GO:0005886,GO:0006464,GO:0006807,GO:0008150,GO:0008152,GO:0009719,GO:0009725,GO:0009737,GO:0009987,GO:0010033,GO:0016020,GO:0016567,GO:0016740,GO:0019538,GO:0019787,GO:0032446,GO:0032870,GO:0033612,GO:0033993,GO:0036211,GO:0042221,GO:0043170,GO:0043226,GO:0043227,GO:…	-	-	-	-	-	-	-	-	-	Arm,U-box
Ssa01000031.t1	3885.XP_007147242.1	1.15e-189	542	KOG0167@1|root,KOG0167@2759|Eukaryota,37I1K@33090|Viridiplantae,3GCSN@35493|Streptophyta,4JJVH@91835|fabids	35493|Streptophyta	S	RING-type E3 ubiquitin transferase	-	GO:0001101,GO:0003674,GO:0003824,GO:0004842,GO:0005102,GO:0005488,GO:0005515,GO:0005575,GO:0005622,GO:0005623,GO:0005634,GO:0005737,GO:0005886,GO:0006464,GO:0006807,GO:0008150,GO:0008152,GO:0009719,GO:0009725,GO:0009737,GO:0009987,GO:0010033,GO:0016020,GO:0016567,GO:0016740,GO:0019538,GO:0019787,GO:0032446,GO:0032870,GO:0033612,GO:0033993,GO:0036211,GO:0042221,GO:0043170,GO:0043226,GO:0043227,GO:…	-	-	-	-	-	-	-	-	-	Arm,U-box
Ssa01000032.t1	3827.XP_004494762.1	0	2358	KOG3534@1|root,KOG3534@2759|Eukaryota,37SAX@33090|Viridiplantae,3G9P6@35493|Streptophyta,4JNQ2@91835|fabids	35493|Streptophyta	S	Cytoplasmic Fragile-X interacting family	-	-	-	ko:K05749	ko03013,ko04810,map03013,map04810	-	-	-	ko00000,ko00001,ko03019	-	-	DUF1394,FragX_IP
Ssa01000032.t2	3827.XP_004494762.1	0	2353	KOG3534@1|root,KOG3534@2759|Eukaryota,37SAX@33090|Viridiplantae,3G9P6@35493|Streptophyta,4JNQ2@91835|fabids	35493|Streptophyta	S	Cytoplasmic Fragile-X interacting family	-	-	-	ko:K05749	ko03013,ko04810,map03013,map04810	-	-	-	ko00000,ko00001,ko03019	-	-	DUF1394,FragX_IP
Ssa01000033.t1	3827.XP_004494760.1	7.43e-218	606	COG3240@1|root,2QQP0@2759|Eukaryota,37KD4@33090|Viridiplantae,3GHJ0@35493|Streptophyta,4JIFE@91835|fabids	35493|Streptophyta	I	Belongs to the 'GDSL' lipolytic enzyme family	-	-	-	-	-	-	-	-	-	-	-	Lipase_GDSL
Ssa01000034.t1	3885.XP_007143993.1	1.61e-223	620	COG3240@1|root,2QQP0@2759|Eukaryota,37KD4@33090|Viridiplantae,3GHJ0@35493|Streptophyta,4JK5K@91835|fabids	35493|Streptophyta	I	Belongs to the 'GDSL' lipolytic enzyme family	-	GO:0001101,GO:0006950,GO:0006970,GO:0006972,GO:0008150,GO:0009628,GO:0009651,GO:0009719,GO:0009725,GO:0009751,GO:0010033,GO:0010035,GO:0010038,GO:0010226,GO:0014070,GO:0042221,GO:0042493,GO:0042538,GO:0046677,GO:0050896,GO:1901700	-	-	-	-	-	-	-	-	-	Lipase_GDSL
Ssa01000035.t1	3847.GLYMA03G16140.1	2.16e-222	618	COG3240@1|root,2QQP0@2759|Eukaryota,37KD4@33090|Viridiplantae,3GHJ0@35493|Streptophyta,4JK5K@91835|fabids	35493|Streptophyta	I	Belongs to the 'GDSL' lipolytic enzyme family	-	GO:0007275,GO:0008150,GO:0032501,GO:0032502,GO:0042335,GO:0048856	-	-	-	-	-	-	-	-	-	Lipase_GDSL
Ssa01000036.t1	3847.GLYMA03G41280.1	5.64e-258	713	28K8K@1|root,2QSP9@2759|Eukaryota,37RZM@33090|Viridiplantae,3GD57@35493|Streptophyta,4JF6P@91835|fabids	35493|Streptophyta	S	Neprosin	-	-	-	-	-	-	-	-	-	-	-	Neprosin,Neprosin_AP
Ssa01000037.t1	3847.GLYMA20G36400.1	1.45e-140	405	28K86@1|root,2QSNX@2759|Eukaryota,37I7Q@33090|Viridiplantae,3GBTN@35493|Streptophyta,4JT90@91835|fabids	35493|Streptophyta	-	-	-	-	-	-	-	-	-	-	-	-	-	DUF3082
Ssa01000038.t1	3847.GLYMA10G31065.1	5.55e-116	334	COG1096@1|root,KOG3409@2759|Eukaryota,37R6Z@33090|Viridiplantae,3G9Z9@35493|Streptophyta,4JDI9@91835|fabids	35493|Streptophyta	J	Exosome complex component	-	-	-	ko:K07573	ko03018,map03018	M00390,M00391	-	-	ko00000,ko00001,ko00002,ko03019	-	-	ECR1_N,EXOSC1
Ssa01000039.t1	3847.GLYMA03G41230.1	2.66e-155	446	28P6W@1|root,2QVTT@2759|Eukaryota,37PW2@33090|Viridiplantae,3GABA@35493|Streptophyta,4JNSW@91835|fabids	35493|Streptophyta	S	DNA-binding protein	-	-	-	-	-	-	-	-	-	-	-	DUF296
Ssa01000040.t1	3847.GLYMA20G36470.1	1.03e-189	538	28JEN@1|root,2QRTM@2759|Eukaryota,37KQT@33090|Viridiplantae,3GCEV@35493|Streptophyta,4JN4Z@91835|fabids	35493|Streptophyta	-	-	-	-	-	-	-	-	-	-	-	-	-	-
Ssa01000041.t1	3983.cassava4.1_017537m	6.37e-114	327	COG0652@1|root,KOG0865@2759|Eukaryota,37RRA@33090|Viridiplantae,3GCAH@35493|Streptophyta,4JFFP@91835|fabids	35493|Streptophyta	O	PPIases accelerate the folding of proteins. It catalyzes the cis-trans isomerization of proline imidic peptide bonds in oligopeptides	-	GO:0000413,GO:0003674,GO:0003755,GO:0003824,GO:0005488,GO:0005575,GO:0005622,GO:0005623,GO:0005737,GO:0005739,GO:0005794,GO:0005829,GO:0006464,GO:0006807,GO:0007154,GO:0007165,GO:0008144,GO:0008150,GO:0008152,GO:0009987,GO:0010035,GO:0010038,GO:0012505,GO:0016018,GO:0016853,GO:0016859,GO:0018193,GO:0018208,GO:0019538,GO:0023052,GO:0033218,GO:0036211,GO:0042221,GO:0042277,GO:0043170,GO:0043226,GO:…	5.2.1.8	ko:K01802	-	-	-	-	ko00000,ko01000	-	-	Pro_isomerase
Ssa01000042.t1	102107.XP_008218310.1	8.1e-207	585	28H5X@1|root,2QRYH@2759|Eukaryota,37K52@33090|Viridiplantae,3GCCR@35493|Streptophyta,4JIIR@91835|fabids	35493|Streptophyta	S	Rubisco accumulation factor	RAF1	GO:0005575,GO:0005622,GO:0005623,GO:0005737,GO:0008150,GO:0009507,GO:0009532,GO:0009536,GO:0009570,GO:0009987,GO:0016043,GO:0022607,GO:0034622,GO:0043226,GO:0043227,GO:0043229,GO:0043231,GO:0043933,GO:0044085,GO:0044422,GO:0044424,GO:0044434,GO:0044435,GO:0044444,GO:0044446,GO:0044464,GO:0065003,GO:0071840,GO:0110102	-	-	-	-	-	-	-	-	-	-
Ssa01000043.t1	3847.GLYMA20G36510.1	9.88e-237	650	COG0639@1|root,KOG0374@2759|Eukaryota,37IYN@33090|Viridiplantae,3G8UW@35493|Streptophyta,4JGJP@91835|fabids	35493|Streptophyta	T	serine threonine-protein phosphatase	-	-	3.1.3.16	ko:K06269	ko03015,ko04022,ko04024,ko04113,ko04114,ko04218,ko04261,ko04270,ko04390,ko04510,ko04611,ko04720,ko04728,ko04750,ko04810,ko04910,ko04921,ko04931,ko05031,ko05034,ko05168,ko05205,map03015,map04022,map04024,map04113,map04114,map04218,map04261,map04270,map04390,map04510,map04611,map04720,map04728,map04750,map04810,map04910,map04921,map04931,map05031,map05034,map05168,map05205	-	-	-	ko00000,ko00001,ko01000,ko01009,ko03019,ko03021,ko03041	-	-	Metallophos,STPPase_N
Ssa01000043.t2	3847.GLYMA20G36510.1	6.87e-230	633	COG0639@1|root,KOG0374@2759|Eukaryota,37IYN@33090|Viridiplantae,3G8UW@35493|Streptophyta,4JGJP@91835|fabids	35493|Streptophyta	T	serine threonine-protein phosphatase	-	-	3.1.3.16	ko:K06269	ko03015,ko04022,ko04024,ko04113,ko04114,ko04218,ko04261,ko04270,ko04390,ko04510,ko04611,ko04720,ko04728,ko04750,ko04810,ko04910,ko04921,ko04931,ko05031,ko05034,ko05168,ko05205,map03015,map04022,map04024,map04113,map04114,map04218,map04261,map04270,map04390,map04510,map04611,map04720,map04728,map04750,map04810,map04910,map04921,map04931,map05031,map05034,map05168,map05205	-	-	-	ko00000,ko00001,ko01000,ko01009,ko03019,ko03021,ko03041	-	-	Metallophos,STPPase_N
Ssa01000044.t1	3847.GLYMA20G36520.1	7.89e-153	434	KOG0032@1|root,KOG0032@2759|Eukaryota,37NMC@33090|Viridiplantae,3GD5A@35493|Streptophyta,4JG1M@91835|fabids	35493|Streptophyta	T	Belongs to the protein kinase superfamily	-	GO:0003674,GO:0003824,GO:0004672,GO:0004674,GO:0004683,GO:0005488,GO:0005515,GO:0005516,GO:0005575,GO:0005622,GO:0005623,GO:0005634,GO:0005737,GO:0006464,GO:0006468,GO:0006793,GO:0006796,GO:0006807,GO:0006950,GO:0007154,GO:0007165,GO:0008150,GO:0008152,GO:0009267,GO:0009314,GO:0009416,GO:0009605,GO:0009628,GO:0009636,GO:0009931,GO:0009987,GO:0009991,GO:0010033,GO:0010243,GO:0010857,GO:0014070,GO:…	2.7.11.17	ko:K04515,ko:K08794	ko04012,ko04020,ko04024,ko04066,ko04114,ko04217,ko04261,ko04310,ko04360,ko04713,ko04720,ko04722,ko04725,ko04728,ko04740,ko04745,ko04750,ko04911,ko04912,ko04916,ko04921,ko04922,ko04925,ko04934,ko04971,ko05031,ko05152,ko05200,ko05205,ko05214,map04012,map04020,map04024,map04066,map04114,map04217,map04261,map04310,map04360,map04713,map04720,map04722,map04725,map04728,map04740,map04745,map04750,map049…	-	-	-	ko00000,ko00001,ko01000,ko01001	-	-	Pkinase
Ssa01000045.t1	3880.AES61204	0	962	KOG2562@1|root,KOG2562@2759|Eukaryota,37JN8@33090|Viridiplantae,3G9I6@35493|Streptophyta,4JGW7@91835|fabids	35493|Streptophyta	A	phosphatase 2A regulatory subunit	-	GO:0005575,GO:0005622,GO:0005623,GO:0005634,GO:0005737,GO:0005829,GO:0043226,GO:0043227,GO:0043229,GO:0043231,GO:0044424,GO:0044444,GO:0044464	-	ko:K11583	ko03015,ko04071,ko04151,ko04152,ko04261,ko04728,ko05165,map03015,map04071,map04151,map04152,map04261,map04728,map05165	-	-	-	ko00000,ko00001,ko01009,ko03036	-	-	EF-hand_5,EF-hand_7
Ssa01000046.t1	3641.EOY10909	5.05e-41	164	KOG4197@1|root,KOG4197@2759|Eukaryota,37HZ6@33090|Viridiplantae,3G9VE@35493|Streptophyta	35493|Streptophyta	L	Pentatricopeptide repeat-containing protein	-	GO:0003674,GO:0003676,GO:0003723,GO:0003824,GO:0004518,GO:0004519,GO:0005488,GO:0005575,GO:0005622,GO:0005623,GO:0005737,GO:0006139,GO:0006725,GO:0006807,GO:0008150,GO:0008152,GO:0009451,GO:0009507,GO:0009536,GO:0009987,GO:0016070,GO:0016787,GO:0016788,GO:0034641,GO:0043170,GO:0043226,GO:0043227,GO:0043229,GO:0043231,GO:0043412,GO:0044237,GO:0044238,GO:0044424,GO:0044444,GO:0044464,GO:0046483,GO:…	-	ko:K17964	-	-	-	-	ko00000,ko03029	-	-	PPR,PPR_1,PPR_2,PPR_3
Ssa01000047.t1	3847.GLYMA20G36070.2	0	1406	COG0055@1|root,KOG1246@2759|Eukaryota,37NW7@33090|Viridiplantae,3GAVP@35493|Streptophyta,4JGTY@91835|fabids	35493|Streptophyta	K	lysine-specific demethylase	-	GO:0000003,GO:0000976,GO:0001067,GO:0003006,GO:0003674,GO:0003676,GO:0003677,GO:0003690,GO:0003700,GO:0003824,GO:0005488,GO:0005506,GO:0005575,GO:0005622,GO:0005623,GO:0005634,GO:0006139,GO:0006259,GO:0006325,GO:0006355,GO:0006464,GO:0006479,GO:0006482,GO:0006725,GO:0006807,GO:0006996,GO:0007275,GO:0008150,GO:0008152,GO:0008168,GO:0008198,GO:0008213,GO:0008214,GO:0008276,GO:0009314,GO:0009416,GO:…	-	ko:K11446	-	-	-	-	ko00000,ko01000,ko01009,ko03036	-	-	FYRC,FYRN,JmjC,JmjN,zf-C5HC2
Ssa01000047.t2	3847.GLYMA20G36070.2	0	1684	COG0055@1|root,KOG1246@2759|Eukaryota,37NW7@33090|Viridiplantae,3GAVP@35493|Streptophyta,4JGTY@91835|fabids	35493|Streptophyta	K	lysine-specific demethylase	-	GO:0000003,GO:0000976,GO:0001067,GO:0003006,GO:0003674,GO:0003676,GO:0003677,GO:0003690,GO:0003700,GO:0003824,GO:0005488,GO:0005506,GO:0005575,GO:0005622,GO:0005623,GO:0005634,GO:0006139,GO:0006259,GO:0006325,GO:0006355,GO:0006464,GO:0006479,GO:0006482,GO:0006725,GO:0006807,GO:0006996,GO:0007275,GO:0008150,GO:0008152,GO:0008168,GO:0008198,GO:0008213,GO:0008214,GO:0008276,GO:0009314,GO:0009416,GO:…	-	ko:K11446	-	-	-	-	ko00000,ko01000,ko01009,ko03036	-	-	FYRC,FYRN,JmjC,JmjN,zf-C5HC2
Ssa01000048.t1	3983.cassava4.1_017018m	4.73e-86	257	28K9U@1|root,2QSQJ@2759|Eukaryota,37RHX@33090|Viridiplantae,3GBRF@35493|Streptophyta,4JH2J@91835|fabids	35493|Streptophyta	S	Protein LIGHT-DEPENDENT SHORT HYPOCOTYLS	LSH1	GO:0000902,GO:0005575,GO:0005622,GO:0005623,GO:0005634,GO:0006139,GO:0006351,GO:0006725,GO:0006807,GO:0008150,GO:0008152,GO:0009058,GO:0009059,GO:0009299,GO:0009314,GO:0009416,GO:0009628,GO:0009637,GO:0009639,GO:0009653,GO:0009826,GO:0009987,GO:0010114,GO:0010218,GO:0010467,GO:0016043,GO:0016049,GO:0016070,GO:0016071,GO:0018130,GO:0019438,GO:0032502,GO:0032774,GO:0032989,GO:0034641,GO:0034645,GO:…	-	-	-	-	-	-	-	-	-	DUF640
Ssa01000049.t1	3885.XP_007147214.1	1.62e-151	431	2C9H7@1|root,2QQTX@2759|Eukaryota,37M3S@33090|Viridiplantae,3GG76@35493|Streptophyta,4JFN7@91835|fabids	35493|Streptophyta	S	Protein CHAPERONE-LIKE PROTEIN OF POR1-like	-	-	-	-	-	-	-	-	-	-	-	CPP1-like
Ssa01000049.t2	3885.XP_007147214.1	2.28e-128	372	2C9H7@1|root,2QQTX@2759|Eukaryota,37M3S@33090|Viridiplantae,3GG76@35493|Streptophyta,4JFN7@91835|fabids	35493|Streptophyta	S	Protein CHAPERONE-LIKE PROTEIN OF POR1-like	-	-	-	-	-	-	-	-	-	-	-	CPP1-like
Ssa01000050.t1	3847.GLYMA19G43740.1	1.55e-90	272	COG5147@1|root,KOG0048@2759|Eukaryota,37JGS@33090|Viridiplantae,3GIR0@35493|Streptophyta,4JTWB@91835|fabids	35493|Streptophyta	K	SANT SWI3, ADA2, N-CoR and TFIIIB'' DNA-binding domains	-	-	-	ko:K09422	-	-	-	-	ko00000,ko03000	-	-	Myb_DNA-binding
Ssa01000051.t1	29730.Gorai.003G070900.1	7.62e-50	181	KOG1075@1|root,KOG1075@2759|Eukaryota,3872A@33090|Viridiplantae,3GQDF@35493|Streptophyta	2759|Eukaryota	S	Domain of unknown function (DUF4283)	-	-	-	-	-	-	-	-	-	-	-	DUF4283,zf-CCHC_4
Ssa01000052.t1	3827.XP_004494741.1	0	1135	KOG0522@1|root,KOG0522@2759|Eukaryota,37PEP@33090|Viridiplantae,3GBCU@35493|Streptophyta,4JJYS@91835|fabids	35493|Streptophyta	S	Ankyrin repeat domain-containing protein	-	GO:0005575,GO:0005622,GO:0005623,GO:0005737,GO:0043226,GO:0043227,GO:0043229,GO:0043231,GO:0044424,GO:0044464	-	ko:K21437	-	-	-	-	ko00000,ko04131	-	-	Ank_5,GPCR_chapero_1
Ssa01000053.t2	3847.GLYMA20G36630.3	3.54e-310	855	28KCQ@1|root,2QSTM@2759|Eukaryota,37MRD@33090|Viridiplantae,3GEDH@35493|Streptophyta,4JNHY@91835|fabids	35493|Streptophyta	-	-	-	-	-	-	-	-	-	-	-	-	-	-
Ssa01000053.t1	3847.GLYMA20G36630.3	0	958	28KCQ@1|root,2QSTM@2759|Eukaryota,37MRD@33090|Viridiplantae,3GEDH@35493|Streptophyta,4JNHY@91835|fabids	35493|Streptophyta	-	-	-	-	-	-	-	-	-	-	-	-	-	-
Ssa01000054.t1	3847.GLYMA19G43710.1	1.5e-65	227	2AGZM@1|root,2RZ14@2759|Eukaryota,37TZ1@33090|Viridiplantae,3GIAF@35493|Streptophyta,4JPRR@91835|fabids	35493|Streptophyta	-	-	-	-	-	-	-	-	-	-	-	-	-	-
Ssa01000055.t1	3847.GLYMA03G41040.3	8.58e-126	378	28KG7@1|root,2RQ9X@2759|Eukaryota,37T6A@33090|Viridiplantae,3GHMU@35493|Streptophyta,4JS7N@91835|fabids	35493|Streptophyta	K	PHR1-LIKE 1-like	-	GO:0003674,GO:0003700,GO:0005575,GO:0005622,GO:0005623,GO:0005634,GO:0006355,GO:0008150,GO:0009888,GO:0009889,GO:0009891,GO:0009893,GO:0010087,GO:0010088,GO:0010089,GO:0010468,GO:0010556,GO:0010557,GO:0010604,GO:0010628,GO:0019219,GO:0019222,GO:0031323,GO:0031325,GO:0031326,GO:0031328,GO:0032502,GO:0043226,GO:0043227,GO:0043229,GO:0043231,GO:0044424,GO:0044464,GO:0045893,GO:0045935,GO:0048518,GO:…	-	-	-	-	-	-	-	-	-	Myb_CC_LHEQLE,Myb_DNA-binding
Ssa01000056.t1	3847.GLYMA20G37110.1	6.69e-316	871	2CMJB@1|root,2QQHV@2759|Eukaryota,37I1T@33090|Viridiplantae,3G8WU@35493|Streptophyta,4JJRU@91835|fabids	35493|Streptophyta	S	Vacuolar protein sorting-associated protein 62	-	-	-	-	-	-	-	-	-	-	-	Vps62
Ssa01000058.t1	3827.XP_004495589.1	0	1648	COG0553@1|root,KOG1015@2759|Eukaryota,37R1J@33090|Viridiplantae,3GAZJ@35493|Streptophyta,4JDQM@91835|fabids	35493|Streptophyta	K	Transcriptional regulator	-	GO:0000775,GO:0000785,GO:0000792,GO:0000902,GO:0000904,GO:0001674,GO:0001932,GO:0003674,GO:0003824,GO:0005488,GO:0005515,GO:0005575,GO:0005622,GO:0005623,GO:0005634,GO:0005694,GO:0005700,GO:0005701,GO:0005721,GO:0005722,GO:0006139,GO:0006259,GO:0006323,GO:0006325,GO:0006333,GO:0006334,GO:0006336,GO:0006342,GO:0006355,GO:0006725,GO:0006807,GO:0006915,GO:0006928,GO:0006935,GO:0006996,GO:0007154,GO:…	3.6.4.12	ko:K10779	-	-	-	-	ko00000,ko01000,ko03000,ko03036	-	-	Helicase_C,SNF2_N
Ssa01000059.t1	3847.GLYMA10G30746.1	1.03e-148	461	COG0553@1|root,KOG1015@2759|Eukaryota,37R1J@33090|Viridiplantae,3GAZJ@35493|Streptophyta,4JDQM@91835|fabids	35493|Streptophyta	K	Transcriptional regulator	-	GO:0000775,GO:0000785,GO:0000792,GO:0000902,GO:0000904,GO:0001674,GO:0001932,GO:0003674,GO:0003824,GO:0005488,GO:0005515,GO:0005575,GO:0005622,GO:0005623,GO:0005634,GO:0005694,GO:0005700,GO:0005701,GO:0005721,GO:0005722,GO:0006139,GO:0006259,GO:0006323,GO:0006325,GO:0006333,GO:0006334,GO:0006336,GO:0006342,GO:0006355,GO:0006725,GO:0006807,GO:0006915,GO:0006928,GO:0006935,GO:0006996,GO:0007154,GO:…	3.6.4.12	ko:K10779	-	-	-	-	ko00000,ko01000,ko03000,ko03036	-	-	Helicase_C,SNF2_N
Ssa01000060.t1	3847.GLYMA10G30720.2	0	1761	COG0465@1|root,KOG0731@2759|Eukaryota,37KWG@33090|Viridiplantae,3G8D8@35493|Streptophyta,4JFWP@91835|fabids	35493|Streptophyta	O	ATPase family associated with various cellular activities (AAA)	-	GO:0003674,GO:0003824,GO:0004176,GO:0005575,GO:0005622,GO:0005623,GO:0005737,GO:0005739,GO:0005911,GO:0006508,GO:0006807,GO:0008150,GO:0008152,GO:0008233,GO:0008237,GO:0009506,GO:0009507,GO:0009526,GO:0009536,GO:0009941,GO:0016462,GO:0016787,GO:0016817,GO:0016818,GO:0016887,GO:0017111,GO:0019538,GO:0030054,GO:0031967,GO:0031975,GO:0042623,GO:0043170,GO:0043226,GO:0043227,GO:0043229,GO:0043231,GO:…	-	-	-	-	-	-	-	-	-	AAA,Peptidase_M41
Ssa01000061.t1	3750.XP_008389021.1	7.3e-30	117	COG4886@1|root,2QPWI@2759|Eukaryota,37PS1@33090|Viridiplantae,3G88H@35493|Streptophyta,4JDY0@91835|fabids	35493|Streptophyta	T	Belongs to the protein kinase superfamily. Ser Thr protein kinase family	-	GO:0000003,GO:0003006,GO:0007275,GO:0008150,GO:0009790,GO:0009791,GO:0009793,GO:0009888,GO:0010065,GO:0010067,GO:0010087,GO:0010154,GO:0022414,GO:0032501,GO:0032502,GO:0048316,GO:0048507,GO:0048508,GO:0048608,GO:0048731,GO:0048856,GO:0061458	-	-	-	-	-	-	-	-	-	LRRNT_2,LRR_1,LRR_6,LRR_8,Pkinase
Ssa01000062.t1	3885.XP_007144024.1	0	897	COG0819@1|root,2QQU0@2759|Eukaryota,37JT0@33090|Viridiplantae,3GBWQ@35493|Streptophyta,4JG7P@91835|fabids	35493|Streptophyta	K	TENA/THI-4/PQQC family	-	GO:0003674,GO:0003824,GO:0003993,GO:0005575,GO:0005622,GO:0005623,GO:0005737,GO:0005739,GO:0005829,GO:0006725,GO:0006766,GO:0006767,GO:0006772,GO:0006790,GO:0006793,GO:0006796,GO:0006807,GO:0008150,GO:0008152,GO:0009058,GO:0009110,GO:0009228,GO:0009987,GO:0016311,GO:0016787,GO:0016788,GO:0016791,GO:0017144,GO:0018130,GO:0019438,GO:0034641,GO:0042131,GO:0042364,GO:0042578,GO:0042723,GO:0042724,GO:…	-	-	-	-	-	-	-	-	-	TENA_THI-4
Ssa01000063.t2	3847.GLYMA19G43610.2	2.74e-165	476	291GY@1|root,2R8CU@2759|Eukaryota,37SYJ@33090|Viridiplantae,3GEE9@35493|Streptophyta,4JFT3@91835|fabids	35493|Streptophyta	S	f-box protein	-	-	-	-	-	-	-	-	-	-	-	F-box
Ssa01000063.t1	3847.GLYMA19G43610.2	1.78e-193	550	291GY@1|root,2R8CU@2759|Eukaryota,37SYJ@33090|Viridiplantae,3GEE9@35493|Streptophyta,4JFT3@91835|fabids	35493|Streptophyta	S	f-box protein	-	-	-	-	-	-	-	-	-	-	-	F-box
Ssa01000063.t3	3847.GLYMA19G43610.2	6.32e-223	626	291GY@1|root,2R8CU@2759|Eukaryota,37SYJ@33090|Viridiplantae,3GEE9@35493|Streptophyta,4JFT3@91835|fabids	35493|Streptophyta	S	f-box protein	-	-	-	-	-	-	-	-	-	-	-	F-box
Ssa01000064.t2	3847.GLYMA20G36970.1	0	2287	COG5022@1|root,KOG0160@2759|Eukaryota,37MUF@33090|Viridiplantae,3G8Q6@35493|Streptophyta,4JEKU@91835|fabids	35493|Streptophyta	Z	Belongs to the TRAFAC class myosin-kinesin ATPase superfamily. Myosin family	-	GO:0000003,GO:0000146,GO:0000166,GO:0000331,GO:0000902,GO:0000904,GO:0003006,GO:0003674,GO:0003774,GO:0003779,GO:0003824,GO:0005488,GO:0005515,GO:0005524,GO:0005575,GO:0005622,GO:0005623,GO:0005737,GO:0005773,GO:0005856,GO:0006928,GO:0006996,GO:0007010,GO:0007015,GO:0008092,GO:0008144,GO:0008150,GO:0009653,GO:0009826,GO:0009856,GO:0009860,GO:0009932,GO:0009987,GO:0015629,GO:0016043,GO:0016049,GO:…	-	ko:K10357	-	-	-	-	ko00000,ko03019,ko03029,ko04131,ko04812	-	-	DIL,IQ,Myosin_N,Myosin_head
Ssa01000064.t1	3847.GLYMA20G36970.1	0	2289	COG5022@1|root,KOG0160@2759|Eukaryota,37MUF@33090|Viridiplantae,3G8Q6@35493|Streptophyta,4JEKU@91835|fabids	35493|Streptophyta	Z	Belongs to the TRAFAC class myosin-kinesin ATPase superfamily. Myosin family	-	GO:0000003,GO:0000146,GO:0000166,GO:0000331,GO:0000902,GO:0000904,GO:0003006,GO:0003674,GO:0003774,GO:0003779,GO:0003824,GO:0005488,GO:0005515,GO:0005524,GO:0005575,GO:0005622,GO:0005623,GO:0005737,GO:0005773,GO:0005856,GO:0006928,GO:0006996,GO:0007010,GO:0007015,GO:0008092,GO:0008144,GO:0008150,GO:0009653,GO:0009826,GO:0009856,GO:0009860,GO:0009932,GO:0009987,GO:0015629,GO:0016043,GO:0016049,GO:…	-	ko:K10357	-	-	-	-	ko00000,ko03019,ko03029,ko04131,ko04812	-	-	DIL,IQ,Myosin_N,Myosin_head
Ssa01000065.t1	3847.GLYMA19G43580.1	9.13e-78	238	KOG3227@1|root,KOG3227@2759|Eukaryota,37MVA@33090|Viridiplantae,3GCQQ@35493|Streptophyta,4JJ3J@91835|fabids	35493|Streptophyta	K	GRF1-interacting factor	-	GO:0003002,GO:0003674,GO:0003712,GO:0003713,GO:0007275,GO:0007389,GO:0008150,GO:0008283,GO:0009889,GO:0009891,GO:0009893,GO:0009955,GO:0010556,GO:0010557,GO:0010604,GO:0019219,GO:0019222,GO:0031323,GO:0031325,GO:0031326,GO:0031328,GO:0032501,GO:0032502,GO:0045935,GO:0048366,GO:0048367,GO:0048518,GO:0048522,GO:0048731,GO:0048827,GO:0048856,GO:0050789,GO:0050794,GO:0051171,GO:0051173,GO:0051252,GO:…	-	-	-	-	-	-	-	-	-	SSXT
Ssa01000066.t1	3847.GLYMA03G40910.1	4.44e-25	98.2	2D04W@1|root,2SCTN@2759|Eukaryota,37XUC@33090|Viridiplantae,3GM1Y@35493|Streptophyta,4JR7Z@91835|fabids	35493|Streptophyta	-	-	-	-	-	-	-	-	-	-	-	-	-	-
Ssa01000067.t1	3847.GLYMA03G40900.1	2.03e-276	792	2CMA9@1|root,2QPSJ@2759|Eukaryota,37NE6@33090|Viridiplantae,3G83P@35493|Streptophyta,4JHMP@91835|fabids	35493|Streptophyta	S	Zein-binding	-	GO:0003674,GO:0005488,GO:0005515,GO:0005575,GO:0005622,GO:0005623,GO:0005737,GO:0008092,GO:0012505,GO:0016020,GO:0016021,GO:0017022,GO:0030133,GO:0031224,GO:0031410,GO:0031982,GO:0043226,GO:0043227,GO:0043229,GO:0044424,GO:0044425,GO:0044444,GO:0044464,GO:0097708	-	-	-	-	-	-	-	-	-	Zein-binding
Ssa01000068.t2	3827.XP_004495604.1	0	1197	28NP1@1|root,2QV8R@2759|Eukaryota,37R4W@33090|Viridiplantae,3GBYM@35493|Streptophyta,4JGPG@91835|fabids	35493|Streptophyta	S	MuDR family transposase	-	-	-	-	-	-	-	-	-	-	-	DBD_Tnp_Mut,MULE,SWIM
Ssa01000068.t1	3827.XP_004495604.1	0	1197	28NP1@1|root,2QV8R@2759|Eukaryota,37R4W@33090|Viridiplantae,3GBYM@35493|Streptophyta,4JGPG@91835|fabids	35493|Streptophyta	S	MuDR family transposase	-	-	-	-	-	-	-	-	-	-	-	DBD_Tnp_Mut,MULE,SWIM
Ssa01000069.t1	3847.GLYMA19G43540.1	1.26e-204	577	KOG2190@1|root,KOG2190@2759|Eukaryota,37J70@33090|Viridiplantae,3GD2I@35493|Streptophyta,4JMPM@91835|fabids	35493|Streptophyta	A	Poly(RC)-binding protein	-	GO:0003674,GO:0003676,GO:0003723,GO:0003729,GO:0003730,GO:0005488,GO:0005575,GO:0005622,GO:0005623,GO:0005634,GO:0005737,GO:0008150,GO:0009909,GO:0009911,GO:0043226,GO:0043227,GO:0043229,GO:0043231,GO:0044424,GO:0044464,GO:0048518,GO:0048580,GO:0048582,GO:0048831,GO:0050789,GO:0050793,GO:0051094,GO:0051239,GO:0051240,GO:0065007,GO:0097159,GO:1901363,GO:2000026,GO:2000241,GO:2000243	-	ko:K21444	-	-	-	-	ko00000,ko03019	-	-	KH_1
Ssa01000070.t1	3827.XP_004495605.1	3.49e-56	179	2CXRF@1|root,2RZ8M@2759|Eukaryota,37VBX@33090|Viridiplantae,3GJ6Z@35493|Streptophyta,4JQ8R@91835|fabids	35493|Streptophyta	S	At2g34160-like	-	GO:0005575,GO:0005622,GO:0005623,GO:0005737,GO:0005829,GO:0044424,GO:0044444,GO:0044464	-	-	-	-	-	-	-	-	-	Alba
Ssa01000071.t1	3827.XP_004495607.1	5.84e-118	353	297RE@1|root,2RERJ@2759|Eukaryota,37R0B@33090|Viridiplantae,3GBDZ@35493|Streptophyta,4JEJT@91835|fabids	35493|Streptophyta	S	Targeting protein for Xklp2 (TPX2)	-	-	-	-	-	-	-	-	-	-	-	TPX2
Ssa01000071.t2	3827.XP_004495607.1	2.21e-111	337	297RE@1|root,2RERJ@2759|Eukaryota,37R0B@33090|Viridiplantae,3GBDZ@35493|Streptophyta,4JEJT@91835|fabids	35493|Streptophyta	S	Targeting protein for Xklp2 (TPX2)	-	-	-	-	-	-	-	-	-	-	-	TPX2
Ssa01000072.t1	3885.XP_007147184.1	4.2e-259	720	COG3380@1|root,2QQW4@2759|Eukaryota,37MQB@33090|Viridiplantae,3GBNU@35493|Streptophyta,4JIS6@91835|fabids	35493|Streptophyta	S	NAD(P)-binding Rossmann-like domain	-	-	-	-	-	-	-	-	-	-	-	NAD_binding_8
Ssa01000072.t2	3885.XP_007147184.1	5.49e-259	721	COG3380@1|root,2QQW4@2759|Eukaryota,37MQB@33090|Viridiplantae,3GBNU@35493|Streptophyta,4JIS6@91835|fabids	35493|Streptophyta	S	NAD(P)-binding Rossmann-like domain	-	-	-	-	-	-	-	-	-	-	-	NAD_binding_8
Ssa01000073.t1	3847.GLYMA10G30560.1	1.63e-35	130	2CYYI@1|root,2S79K@2759|Eukaryota,38A8B@33090|Viridiplantae,3GY3S@35493|Streptophyta	35493|Streptophyta	B	Domain in histone families 1 and 5	-	-	-	ko:K11275	-	-	-	-	ko00000,ko03036	-	-	Linker_histone
Ssa01000074.t1	3847.GLYMA10G30540.1	2.85e-53	174	KOG4197@1|root,KOG4197@2759|Eukaryota,37UC3@33090|Viridiplantae,3GI9W@35493|Streptophyta,4JP7Z@91835|fabids	35493|Streptophyta	S	Protein of unknown function (DUF1685)	-	-	-	-	-	-	-	-	-	-	-	DUF1685
Ssa01000074.t2	3847.GLYMA10G30540.1	2.03e-53	174	KOG4197@1|root,KOG4197@2759|Eukaryota,37UC3@33090|Viridiplantae,3GI9W@35493|Streptophyta,4JP7Z@91835|fabids	35493|Streptophyta	S	Protein of unknown function (DUF1685)	-	-	-	-	-	-	-	-	-	-	-	DUF1685
Ssa01000075.t1	2711.XP_006487783.1	7.2e-152	446	COG0457@1|root,COG0666@1|root,KOG0504@2759|Eukaryota,KOG0548@2759|Eukaryota,37HF2@33090|Viridiplantae,3G8J9@35493|Streptophyta	35493|Streptophyta	O	ankyrin repeat	-	-	-	-	-	-	-	-	-	-	-	Ank_2,Ank_3,Ank_4,Ank_5,DUF1685,TPR_17,TPR_8
Ssa01000076.t1	3988.XP_002531279.1	3.11e-60	194	KOG3142@1|root,KOG3142@2759|Eukaryota,37S5T@33090|Viridiplantae,3GHUS@35493|Streptophyta,4JPA7@91835|fabids	35493|Streptophyta	U	May be involved in both secretory and endocytic intracellular trafficking in the endosomal prevacuolar compartments	-	-	-	ko:K20359	-	-	-	-	ko00000,ko02000,ko04131	9.A.49.1	-	PRA1
Ssa01000077.t1	3885.XP_007144831.1	1.92e-227	636	KOG2660@1|root,KOG2660@2759|Eukaryota,37M3A@33090|Viridiplantae,3G82B@35493|Streptophyta,4JDI8@91835|fabids	35493|Streptophyta	O	E3 ubiquitin protein ligase DRIP2-like	-	GO:0001101,GO:0003674,GO:0003824,GO:0004842,GO:0006464,GO:0006807,GO:0006950,GO:0008150,GO:0008152,GO:0009414,GO:0009415,GO:0009628,GO:0009987,GO:0010035,GO:0016567,GO:0016740,GO:0019538,GO:0019787,GO:0032446,GO:0036211,GO:0042221,GO:0043170,GO:0043412,GO:0044237,GO:0044238,GO:0044260,GO:0044267,GO:0050896,GO:0051865,GO:0070647,GO:0071704,GO:0140096,GO:1901564,GO:1901700	2.3.2.27	ko:K16277	-	-	-	-	ko00000,ko01000,ko04121	-	-	zf-C3HC4_2
Ssa01000078.t1	3827.XP_004494704.1	1.46e-110	322	COG3979@1|root,KOG4742@2759|Eukaryota,37RED@33090|Viridiplantae,3G896@35493|Streptophyta,4JD13@91835|fabids	35493|Streptophyta	S	chitin binding	-	GO:0002376,GO:0003674,GO:0003824,GO:0004518,GO:0004540,GO:0005488,GO:0006139,GO:0006725,GO:0006807,GO:0006950,GO:0006952,GO:0006955,GO:0006970,GO:0008061,GO:0008144,GO:0008150,GO:0008152,GO:0009605,GO:0009607,GO:0009615,GO:0009620,GO:0009627,GO:0009628,GO:0009651,GO:0009719,GO:0009723,GO:0009725,GO:0009814,GO:0009817,GO:0009987,GO:0010033,GO:0016070,GO:0016787,GO:0016788,GO:0034641,GO:0042221,GO:…	-	-	-	-	-	-	-	-	-	Barwin,Chitin_bind_1
Ssa01000079.t1	3649.evm.model.supercontig_29.105	9.18e-313	864	COG0457@1|root,KOG0548@2759|Eukaryota,37KEJ@33090|Viridiplantae,3G8SM@35493|Streptophyta,3HYBV@3699|Brassicales	35493|Streptophyta	O	hsp70-Hsp90 organizing protein	-	GO:0000302,GO:0003674,GO:0005488,GO:0005515,GO:0006950,GO:0006979,GO:0006986,GO:0008150,GO:0009266,GO:0009314,GO:0009408,GO:0009409,GO:0009416,GO:0009611,GO:0009628,GO:0009636,GO:0009642,GO:0009644,GO:0009987,GO:0010033,GO:0010035,GO:0010286,GO:0016043,GO:0022607,GO:0031072,GO:0033554,GO:0034605,GO:0034622,GO:0035966,GO:0042221,GO:0042493,GO:0042542,GO:0043933,GO:0044085,GO:0046677,GO:0050896,GO:…	-	ko:K09553	ko05020,map05020	-	-	-	ko00000,ko00001,ko03110	-	-	TPR_1,TPR_11,TPR_16,TPR_2,TPR_8
Ssa01000080.t1	3983.cassava4.1_031199m	8.76e-254	721	KOG4197@1|root,KOG4197@2759|Eukaryota,37PUM@33090|Viridiplantae,3GFPW@35493|Streptophyta,4JMFD@91835|fabids	35493|Streptophyta	S	Pentatricopeptide repeat-containing protein	-	-	-	-	-	-	-	-	-	-	-	PPR,PPR_2
Ssa01000081.t1	225117.XP_009364493.1	2.88e-116	347	2CM8D@1|root,2QPM5@2759|Eukaryota,37IJE@33090|Viridiplantae,3GAEU@35493|Streptophyta,4JK6Z@91835|fabids	35493|Streptophyta	K	Transcription factor UNE12-like	-	-	-	-	-	-	-	-	-	-	-	HLH
Ssa01000082.t1	3988.XP_002531294.1	2.43e-47	157	COG1826@1|root,2S4T0@2759|Eukaryota,37W66@33090|Viridiplantae,3GK5V@35493|Streptophyta,4JQ1A@91835|fabids	35493|Streptophyta	U	Sec-independent protein translocase protein TATA	-	GO:0003674,GO:0005215,GO:0005575,GO:0005622,GO:0005623,GO:0005737,GO:0006605,GO:0006612,GO:0006810,GO:0006886,GO:0008104,GO:0008150,GO:0008320,GO:0008565,GO:0009507,GO:0009534,GO:0009535,GO:0009536,GO:0009579,GO:0009977,GO:0015031,GO:0015291,GO:0015399,GO:0015405,GO:0015450,GO:0015833,GO:0016020,GO:0016021,GO:0017038,GO:0022804,GO:0022857,GO:0022884,GO:0031224,GO:0031360,GO:0031361,GO:0031976,GO:…	-	ko:K03116	ko03060,ko03070,map03060,map03070	M00336	-	-	ko00000,ko00001,ko00002,ko02044	2.A.64	-	MttA_Hcf106
Ssa01000083.t2	3847.GLYMA12G31510.1	3.36e-236	662	KOG4197@1|root,KOG4197@2759|Eukaryota,37S4D@33090|Viridiplantae,3GC71@35493|Streptophyta,4JMXJ@91835|fabids	35493|Streptophyta	S	Pentatricopeptide repeat-containing protein	-	GO:0000959,GO:0003674,GO:0003676,GO:0003723,GO:0003824,GO:0004518,GO:0004519,GO:0005488,GO:0006139,GO:0006725,GO:0006807,GO:0008150,GO:0008152,GO:0009451,GO:0009987,GO:0016070,GO:0016071,GO:0016556,GO:0016787,GO:0016788,GO:0034641,GO:0043170,GO:0043412,GO:0044237,GO:0044238,GO:0046483,GO:0071704,GO:0080156,GO:0090304,GO:0090305,GO:0097159,GO:1900864,GO:1901360,GO:1901363	-	-	-	-	-	-	-	-	-	PPR,PPR_2
Ssa01000083.t1	3847.GLYMA12G31510.1	7.33e-236	661	KOG4197@1|root,KOG4197@2759|Eukaryota,37S4D@33090|Viridiplantae,3GC71@35493|Streptophyta,4JMXJ@91835|fabids	35493|Streptophyta	S	Pentatricopeptide repeat-containing protein	-	GO:0000959,GO:0003674,GO:0003676,GO:0003723,GO:0003824,GO:0004518,GO:0004519,GO:0005488,GO:0006139,GO:0006725,GO:0006807,GO:0008150,GO:0008152,GO:0009451,GO:0009987,GO:0016070,GO:0016071,GO:0016556,GO:0016787,GO:0016788,GO:0034641,GO:0043170,GO:0043412,GO:0044237,GO:0044238,GO:0046483,GO:0071704,GO:0080156,GO:0090304,GO:0090305,GO:0097159,GO:1900864,GO:1901360,GO:1901363	-	-	-	-	-	-	-	-	-	PPR,PPR_2
Ssa01000084.t1	3885.XP_007144827.1	3.56e-157	458	28JM3@1|root,2QS0A@2759|Eukaryota,37KSE@33090|Viridiplantae,3GE66@35493|Streptophyta,4JJ16@91835|fabids	35493|Streptophyta	K	Light-inducible protein	-	GO:0001101,GO:0001678,GO:0003674,GO:0003676,GO:0003677,GO:0003700,GO:0005488,GO:0005515,GO:0005575,GO:0005622,GO:0005623,GO:0005634,GO:0006109,GO:0006355,GO:0008150,GO:0009719,GO:0009725,GO:0009737,GO:0009743,GO:0009746,GO:0009749,GO:0009889,GO:0009891,GO:0009893,GO:0009987,GO:0010033,GO:0010468,GO:0010556,GO:0010557,GO:0010581,GO:0010604,GO:0010628,GO:0010675,GO:0010962,GO:0019219,GO:0019222,GO:…	-	-	-	-	-	-	-	-	-	bZIP_1,bZIP_C
Ssa01000085.t1	3847.GLYMA10G30400.1	2.66e-230	636	COG0451@1|root,KOG1429@2759|Eukaryota,37J0N@33090|Viridiplantae,3GBX4@35493|Streptophyta,4JT4E@91835|fabids	35493|Streptophyta	GM	GDP-mannose 4,6 dehydratase	GME1	-	5.1.3.18	ko:K10046	ko00053,ko00520,ko01100,ko01110,map00053,map00520,map01100,map01110	M00114	R00889,R07672,R07673	RC00289,RC00403,RC01780	ko00000,ko00001,ko00002,ko01000	-	-	Epimerase
Ssa01000085.t2	3847.GLYMA10G30400.1	2.79e-277	757	COG0451@1|root,KOG1429@2759|Eukaryota,37J0N@33090|Viridiplantae,3GBX4@35493|Streptophyta,4JT4E@91835|fabids	35493|Streptophyta	GM	GDP-mannose 4,6 dehydratase	GME1	-	5.1.3.18	ko:K10046	ko00053,ko00520,ko01100,ko01110,map00053,map00520,map01100,map01110	M00114	R00889,R07672,R07673	RC00289,RC00403,RC01780	ko00000,ko00001,ko00002,ko01000	-	-	Epimerase
Ssa01000086.t1	3847.GLYMA03G40710.1	3.66e-134	390	28PAS@1|root,2QVY4@2759|Eukaryota,37MVG@33090|Viridiplantae,3GEWA@35493|Streptophyta,4JDU2@91835|fabids	35493|Streptophyta	S	Calcium-binding EF hand family protein	-	-	-	-	-	-	-	-	-	-	-	EF-hand_5,EF-hand_7
Ssa01000086.t2	3847.GLYMA19G43390.1	2.37e-149	429	28PAS@1|root,2QVY4@2759|Eukaryota,37MVG@33090|Viridiplantae,3GEWA@35493|Streptophyta,4JDU2@91835|fabids	35493|Streptophyta	S	Calcium-binding EF hand family protein	-	-	-	-	-	-	-	-	-	-	-	EF-hand_5,EF-hand_7
Ssa01000087.t1	3880.AES82665	1e-131	388	COG0004@1|root,KOG0682@2759|Eukaryota,37JYK@33090|Viridiplantae,3G7AD@35493|Streptophyta,4JNG9@91835|fabids	35493|Streptophyta	P	ammonium transporter	-	-	-	ko:K03320	-	-	-	-	ko00000,ko02000	1.A.11	-	Ammonium_transp
Ssa01000088.t1	981085.XP_010102301.1	1.23e-66	221	COG0667@1|root,KOG1575@2759|Eukaryota,37HT0@33090|Viridiplantae,3GB6U@35493|Streptophyta,4JRB6@91835|fabids	35493|Streptophyta	C	Aldo/keto reductase family	-	-	-	-	-	-	-	-	-	-	-	Aldo_ket_red
Ssa01000089.t1	3880.AES82656	6.52e-32	120	COG0667@1|root,KOG1575@2759|Eukaryota,37HT0@33090|Viridiplantae,3GB6U@35493|Streptophyta,4JRGH@91835|fabids	35493|Streptophyta	C	aldo-keto reductase	-	-	-	-	-	-	-	-	-	-	-	Aldo_ket_red
Ssa01000090.t1	3847.GLYMA10G30350.1	7.11e-112	322	KOG0908@1|root,KOG0908@2759|Eukaryota,37PB1@33090|Viridiplantae,3GCFF@35493|Streptophyta,4JP5E@91835|fabids	35493|Streptophyta	O	PITH domain-containing protein	-	-	-	-	-	-	-	-	-	-	-	PITH
Ssa01000091.t1	3847.GLYMA10G30340.1	7.85e-107	312	2CXV9@1|root,2S013@2759|Eukaryota,37USI@33090|Viridiplantae,3GIVJ@35493|Streptophyta,4JPU5@91835|fabids	35493|Streptophyta	-	-	-	-	-	-	-	-	-	-	-	-	-	-
Ssa01000092.t1	3847.GLYMA19G43300.2	5.18e-78	248	2B1JV@1|root,2S0AM@2759|Eukaryota,37V36@33090|Viridiplantae,3GGAV@35493|Streptophyta,4JPJ7@91835|fabids	35493|Streptophyta	S	Protein of unknown function (DUF4005)	-	-	-	-	-	-	-	-	-	-	-	DUF4005,IQ
Ssa01000093.t1	3885.XP_007144821.1	0	944	KOG0589@1|root,KOG0589@2759|Eukaryota,37HWZ@33090|Viridiplantae,3G7J2@35493|Streptophyta,4JNJY@91835|fabids	35493|Streptophyta	T	Serine threonine-protein kinase	NEK1	-	2.7.11.1	ko:K08857	-	-	-	-	ko00000,ko01000,ko01001,ko03036,ko03400	-	-	Pkinase
Ssa01000094.t1	3847.GLYMA20G36660.1	5.13e-99	290	COG5596@1|root,KOG3324@2759|Eukaryota,37HYR@33090|Viridiplantae,3G7JV@35493|Streptophyta,4JKP5@91835|fabids	35493|Streptophyta	U	Mitochondrial import inner membrane translocase subunit	-	GO:0005575,GO:0005622,GO:0005623,GO:0005737,GO:0005739,GO:0005740,GO:0005743,GO:0005744,GO:0006605,GO:0006626,GO:0006810,GO:0006839,GO:0006886,GO:0006996,GO:0007005,GO:0008104,GO:0008150,GO:0009987,GO:0015031,GO:0015833,GO:0016020,GO:0016021,GO:0016043,GO:0017038,GO:0019866,GO:0030150,GO:0031090,GO:0031224,GO:0031300,GO:0031301,GO:0031304,GO:0031305,GO:0031966,GO:0031967,GO:0031975,GO:0032592,GO:…	-	ko:K17794	ko04212,map04212	-	-	-	ko00000,ko00001,ko02000,ko03029	3.A.8.1	-	Tim17
Ssa01000095.t1	3885.XP_007144818.1	9.11e-202	564	KOG2931@1|root,KOG2931@2759|Eukaryota,37MIH@33090|Viridiplantae,3G8FD@35493|Streptophyta,4JI8Q@91835|fabids	35493|Streptophyta	S	Ndr family	-	-	-	ko:K18266	-	-	-	-	ko00000,ko04147	-	-	Ndr
Ssa01000095.t2	71139.XP_010041425.1	2.02e-197	553	KOG2931@1|root,KOG2931@2759|Eukaryota,37MIH@33090|Viridiplantae,3G8FD@35493|Streptophyta	35493|Streptophyta	S	Pollen-specific protein	-	-	-	ko:K18266	-	-	-	-	ko00000,ko04147	-	-	Ndr
Ssa01000095.t3	71139.XP_010041425.1	5.41e-200	560	KOG2931@1|root,KOG2931@2759|Eukaryota,37MIH@33090|Viridiplantae,3G8FD@35493|Streptophyta	35493|Streptophyta	S	Pollen-specific protein	-	-	-	ko:K18266	-	-	-	-	ko00000,ko04147	-	-	Ndr
Ssa01000096.t1	2711.XP_006471719.1	3.64e-40	142	2D2VJ@1|root,2SP6H@2759|Eukaryota,3800Q@33090|Viridiplantae,3GJSY@35493|Streptophyta	35493|Streptophyta	-	-	-	-	-	-	-	-	-	-	-	-	-	-
Ssa01000097.t1	3880.AES61263	3.14e-48	158	2AX2H@1|root,2S3KI@2759|Eukaryota,37WJP@33090|Viridiplantae,3GKJA@35493|Streptophyta,4JR02@91835|fabids	35493|Streptophyta	T	EF-hand, calcium binding motif	-	-	-	-	-	-	-	-	-	-	-	EF-hand_1,EF-hand_5,EF-hand_6
Ssa01000098.t1	3847.GLYMA10G30211.1	0	1095	KOG0584@1|root,KOG0584@2759|Eukaryota,37J6K@33090|Viridiplantae,3G9KP@35493|Streptophyta,4JDVY@91835|fabids	35493|Streptophyta	T	Serine threonine-protein kinase	WNK1	GO:0003674,GO:0003824,GO:0004672,GO:0004674,GO:0005575,GO:0005622,GO:0005623,GO:0005737,GO:0005829,GO:0006464,GO:0006468,GO:0006793,GO:0006796,GO:0006807,GO:0007154,GO:0007165,GO:0007623,GO:0008150,GO:0008152,GO:0009987,GO:0016020,GO:0016301,GO:0016310,GO:0016740,GO:0016772,GO:0016773,GO:0019538,GO:0023052,GO:0035556,GO:0036211,GO:0043170,GO:0043412,GO:0044237,GO:0044238,GO:0044260,GO:0044267,GO:…	2.7.11.1	ko:K08867	-	-	-	-	ko00000,ko01000,ko01001,ko01009	-	-	OSR1_C,Pkinase
Ssa01000099.t1	3847.GLYMA20G37210.2	3.96e-115	332	COG0590@1|root,KOG1018@2759|Eukaryota,37KTE@33090|Viridiplantae,3GFQC@35493|Streptophyta,4JMG7@91835|fabids	35493|Streptophyta	F	deaminase	-	GO:0006139,GO:0006725,GO:0006807,GO:0008150,GO:0008152,GO:0009451,GO:0009987,GO:0016070,GO:0034641,GO:0043170,GO:0043412,GO:0044237,GO:0044238,GO:0046483,GO:0071704,GO:0090304,GO:1901360	-	-	-	-	-	-	-	-	-	dCMP_cyt_deam_1
Ssa01000100.t1	981085.XP_010090273.1	2.38e-118	357	2CN76@1|root,2QUAW@2759|Eukaryota,37RVQ@33090|Viridiplantae,3GGTZ@35493|Streptophyta,4JMHI@91835|fabids	35493|Streptophyta	S	Mediator-associated protein	-	GO:0003674,GO:0003676,GO:0003677,GO:0005488,GO:0006355,GO:0008150,GO:0009889,GO:0010468,GO:0010556,GO:0019219,GO:0019222,GO:0031323,GO:0031326,GO:0043565,GO:0050789,GO:0050794,GO:0051171,GO:0051252,GO:0060255,GO:0065007,GO:0080090,GO:0097159,GO:1901363,GO:1903506,GO:2000112,GO:2001141	-	-	-	-	-	-	-	-	-	DUF573
Ssa01000101.t2	3847.GLYMA03G40500.1	0	1307	COG5049@1|root,KOG2044@2759|Eukaryota,37RC1@33090|Viridiplantae,3GGEM@35493|Streptophyta,4JJR0@91835|fabids	35493|Streptophyta	AL	5'-3' exoribonuclease	XRN4	GO:0000291,GO:0000902,GO:0000932,GO:0000956,GO:0003674,GO:0003676,GO:0003723,GO:0003729,GO:0003824,GO:0004518,GO:0004527,GO:0004532,GO:0004534,GO:0004540,GO:0005488,GO:0005575,GO:0005622,GO:0005623,GO:0005737,GO:0005829,GO:0005844,GO:0006139,GO:0006401,GO:0006402,GO:0006725,GO:0006807,GO:0006950,GO:0008150,GO:0008152,GO:0008409,GO:0009056,GO:0009057,GO:0009266,GO:0009408,GO:0009628,GO:0009653,GO:…	-	ko:K12619,ko:K20553	ko03008,ko03018,ko04016,map03008,map03018,map04016	-	-	-	ko00000,ko00001,ko01000,ko03009,ko03016,ko03019,ko03021	-	-	XRN_N,zf-CCHC
Ssa01000101.t1	3847.GLYMA03G40500.1	0	1506	COG5049@1|root,KOG2044@2759|Eukaryota,37RC1@33090|Viridiplantae,3GGEM@35493|Streptophyta,4JJR0@91835|fabids	35493|Streptophyta	AL	5'-3' exoribonuclease	XRN4	GO:0000291,GO:0000902,GO:0000932,GO:0000956,GO:0003674,GO:0003676,GO:0003723,GO:0003729,GO:0003824,GO:0004518,GO:0004527,GO:0004532,GO:0004534,GO:0004540,GO:0005488,GO:0005575,GO:0005622,GO:0005623,GO:0005737,GO:0005829,GO:0005844,GO:0006139,GO:0006401,GO:0006402,GO:0006725,GO:0006807,GO:0006950,GO:0008150,GO:0008152,GO:0008409,GO:0009056,GO:0009057,GO:0009266,GO:0009408,GO:0009628,GO:0009653,GO:…	-	ko:K12619,ko:K20553	ko03008,ko03018,ko04016,map03008,map03018,map04016	-	-	-	ko00000,ko00001,ko01000,ko03009,ko03016,ko03019,ko03021	-	-	XRN_N,zf-CCHC
Ssa01000102.t1	3847.GLYMA19G43150.1	3.95e-208	578	COG0031@1|root,KOG1252@2759|Eukaryota,37MTM@33090|Viridiplantae,3G849@35493|Streptophyta,4JHZ3@91835|fabids	35493|Streptophyta	E	Belongs to the cysteine synthase cystathionine beta- synthase family	-	-	2.5.1.47	ko:K01738	ko00270,ko00920,ko01100,ko01110,ko01120,ko01130,ko01200,ko01230,map00270,map00920,map01100,map01110,map01120,map01130,map01200,map01230	M00021	R00897,R03601,R04859	RC00020,RC02814,RC02821	ko00000,ko00001,ko00002,ko01000	-	-	PALP
Ssa01000103.t1	3847.GLYMA10G30130.1	3.91e-180	508	COG0031@1|root,KOG1252@2759|Eukaryota,37K14@33090|Viridiplantae,3GHKI@35493|Streptophyta,4JSEI@91835|fabids	35493|Streptophyta	E	Belongs to the cysteine synthase cystathionine beta- synthase family	-	GO:0000096,GO:0000097,GO:0003674,GO:0003824,GO:0004124,GO:0005488,GO:0005575,GO:0005622,GO:0005623,GO:0005737,GO:0006082,GO:0006520,GO:0006534,GO:0006535,GO:0006563,GO:0006790,GO:0006807,GO:0008144,GO:0008150,GO:0008152,GO:0008652,GO:0009058,GO:0009069,GO:0009070,GO:0009987,GO:0016053,GO:0016740,GO:0016765,GO:0016829,GO:0016846,GO:0019344,GO:0019752,GO:0019842,GO:0030170,GO:0036094,GO:0042592,GO:…	2.5.1.47	ko:K01738	ko00270,ko00920,ko01100,ko01110,ko01120,ko01130,ko01200,ko01230,map00270,map00920,map01100,map01110,map01120,map01130,map01200,map01230	M00021	R00897,R03601,R04859	RC00020,RC02814,RC02821	ko00000,ko00001,ko00002,ko01000	-	-	PALP
Ssa01000103.t2	3847.GLYMA10G30130.1	2.75e-180	508	COG0031@1|root,KOG1252@2759|Eukaryota,37K14@33090|Viridiplantae,3GHKI@35493|Streptophyta,4JSEI@91835|fabids	35493|Streptophyta	E	Belongs to the cysteine synthase cystathionine beta- synthase family	-	GO:0000096,GO:0000097,GO:0003674,GO:0003824,GO:0004124,GO:0005488,GO:0005575,GO:0005622,GO:0005623,GO:0005737,GO:0006082,GO:0006520,GO:0006534,GO:0006535,GO:0006563,GO:0006790,GO:0006807,GO:0008144,GO:0008150,GO:0008152,GO:0008652,GO:0009058,GO:0009069,GO:0009070,GO:0009987,GO:0016053,GO:0016740,GO:0016765,GO:0016829,GO:0016846,GO:0019344,GO:0019752,GO:0019842,GO:0030170,GO:0036094,GO:0042592,GO:…	2.5.1.47	ko:K01738	ko00270,ko00920,ko01100,ko01110,ko01120,ko01130,ko01200,ko01230,map00270,map00920,map01100,map01110,map01120,map01130,map01200,map01230	M00021	R00897,R03601,R04859	RC00020,RC02814,RC02821	ko00000,ko00001,ko00002,ko01000	-	-	PALP
Ssa01000104.t1	3885.XP_007144794.1	9.79e-109	323	2CQ7B@1|root,2R41N@2759|Eukaryota,37MFI@33090|Viridiplantae,3GJKX@35493|Streptophyta,4JE0N@91835|fabids	35493|Streptophyta	S	Late embryogenesis abundant protein	-	-	-	-	-	-	-	-	-	-	-	SMP
Ssa01000105.t1	3847.GLYMA19G43050.1	1.54e-281	783	2CMA6@1|root,2QPS4@2759|Eukaryota,37NEK@33090|Viridiplantae,3GAGN@35493|Streptophyta,4JKEJ@91835|fabids	35493|Streptophyta	S	Galactose oxidase	-	-	1.2.3.15	ko:K20929	-	-	-	-	ko00000,ko01000	-	-	DUF1929,Glyoxal_oxid_N
Ssa01000106.t1	3827.XP_004495773.1	0	1363	COG0515@1|root,KOG0192@2759|Eukaryota,37JYB@33090|Viridiplantae,3GFEU@35493|Streptophyta,4JK4A@91835|fabids	35493|Streptophyta	T	Serine threonine-protein kinase	EDR1	GO:0000165,GO:0000186,GO:0001101,GO:0001666,GO:0001932,GO:0001934,GO:0002229,GO:0002239,GO:0002831,GO:0003674,GO:0003824,GO:0004672,GO:0004674,GO:0004709,GO:0004712,GO:0005575,GO:0005622,GO:0005623,GO:0005634,GO:0005737,GO:0005768,GO:0005769,GO:0005783,GO:0005789,GO:0005794,GO:0005798,GO:0005802,GO:0005829,GO:0005886,GO:0006082,GO:0006464,GO:0006468,GO:0006629,GO:0006720,GO:0006721,GO:0006793,GO:…	-	-	-	-	-	-	-	-	-	EDR1,Pkinase_Tyr
Ssa01000107.t1	3750.XP_008350627.1	1.67e-20	87	COG1670@1|root,2RRQY@2759|Eukaryota,37U08@33090|Viridiplantae,3GI6J@35493|Streptophyta,4JP7J@91835|fabids	35493|Streptophyta	J	Acetyltransferase (GNAT) domain	-	-	-	-	-	-	-	-	-	-	-	Acetyltransf_3
Ssa01000108.t1	3656.XP_008450751.1	5.55e-111	323	2CM9H@1|root,2QPPM@2759|Eukaryota,37KKY@33090|Viridiplantae,3GBQM@35493|Streptophyta,4JIEI@91835|fabids	35493|Streptophyta	S	SEC-C motif	-	-	-	-	-	-	-	-	-	-	-	SEC-C
Ssa01000109.t1	3885.XP_007134843.1	8.69e-198	553	28PI1@1|root,2QW64@2759|Eukaryota,37KAV@33090|Viridiplantae,3GG37@35493|Streptophyta,4JIVJ@91835|fabids	35493|Streptophyta	-	-	-	-	-	-	-	-	-	-	-	-	-	Methyltransf_23
Ssa01000110.t1	3988.XP_002512270.1	0	1082	KOG0308@1|root,KOG0308@2759|Eukaryota,37MN5@33090|Viridiplantae,3G809@35493|Streptophyta,4JJZY@91835|fabids	35493|Streptophyta	S	WD repeat-containing protein	-	GO:0005575,GO:0005622,GO:0005623,GO:0005634,GO:0006464,GO:0006508,GO:0006807,GO:0008150,GO:0008152,GO:0009987,GO:0016579,GO:0019538,GO:0036211,GO:0043170,GO:0043226,GO:0043227,GO:0043229,GO:0043231,GO:0043412,GO:0044237,GO:0044238,GO:0044260,GO:0044267,GO:0044424,GO:0044464,GO:0070646,GO:0070647,GO:0071704,GO:1901564	-	ko:K15361	ko03460,map03460	-	-	-	ko00000,ko00001,ko03400	-	-	DUF3337,WD40
Ssa01000112.t2	3885.XP_007147119.1	2.07e-294	814	KOG0600@1|root,KOG0600@2759|Eukaryota,37RJI@33090|Viridiplantae,3G8NT@35493|Streptophyta,4JIIY@91835|fabids	35493|Streptophyta	T	Serine threonine-protein kinase	-	GO:0003674,GO:0003824,GO:0004672,GO:0004674,GO:0004693,GO:0005575,GO:0005622,GO:0005623,GO:0005634,GO:0005886,GO:0006464,GO:0006468,GO:0006793,GO:0006796,GO:0006807,GO:0008150,GO:0008152,GO:0009987,GO:0016020,GO:0016301,GO:0016310,GO:0016740,GO:0016772,GO:0016773,GO:0019538,GO:0036211,GO:0043170,GO:0043226,GO:0043227,GO:0043229,GO:0043231,GO:0043412,GO:0044237,GO:0044238,GO:0044260,GO:0044267,GO:…	2.7.11.22,2.7.11.23	ko:K08819	-	-	-	-	ko00000,ko01000,ko01001	-	-	Pkinase
Ssa01000112.t1	3885.XP_007147119.1	0	983	KOG0600@1|root,KOG0600@2759|Eukaryota,37RJI@33090|Viridiplantae,3G8NT@35493|Streptophyta,4JIIY@91835|fabids	35493|Streptophyta	T	Serine threonine-protein kinase	-	GO:0003674,GO:0003824,GO:0004672,GO:0004674,GO:0004693,GO:0005575,GO:0005622,GO:0005623,GO:0005634,GO:0005886,GO:0006464,GO:0006468,GO:0006793,GO:0006796,GO:0006807,GO:0008150,GO:0008152,GO:0009987,GO:0016020,GO:0016301,GO:0016310,GO:0016740,GO:0016772,GO:0016773,GO:0019538,GO:0036211,GO:0043170,GO:0043226,GO:0043227,GO:0043229,GO:0043231,GO:0043412,GO:0044237,GO:0044238,GO:0044260,GO:0044267,GO:…	2.7.11.22,2.7.11.23	ko:K08819	-	-	-	-	ko00000,ko01000,ko01001	-	-	Pkinase
Ssa01000113.t1	3847.GLYMA03G40300.1	0	1021	COG1208@1|root,KOG1461@2759|Eukaryota,37MUH@33090|Viridiplantae,3GCPK@35493|Streptophyta,4JHP3@91835|fabids	35493|Streptophyta	J	Translation initiation factor eIF-2B subunit	-	GO:0002181,GO:0002183,GO:0003674,GO:0003676,GO:0003723,GO:0003743,GO:0005085,GO:0005488,GO:0005515,GO:0005575,GO:0005622,GO:0005623,GO:0005737,GO:0005851,GO:0006412,GO:0006413,GO:0006518,GO:0006807,GO:0008135,GO:0008150,GO:0008152,GO:0009058,GO:0009059,GO:0009987,GO:0010467,GO:0019538,GO:0019899,GO:0032991,GO:0034641,GO:0034645,GO:0043043,GO:0043170,GO:0043603,GO:0043604,GO:0044237,GO:0044238,GO:…	-	ko:K03240	ko03013,map03013	-	-	-	ko00000,ko00001,ko03012	-	-	Hexapep,Hexapep_2,NTP_transferase,W2
Ssa01000114.t1	3827.XP_004495768.1	0	873	COG0025@1|root,KOG1965@2759|Eukaryota,37KWA@33090|Viridiplantae,3GC66@35493|Streptophyta,4JJT6@91835|fabids	35493|Streptophyta	P	Sodium hydrogen exchanger	NHX1	GO:0000325,GO:0003674,GO:0005215,GO:0005451,GO:0005575,GO:0005622,GO:0005623,GO:0005737,GO:0005773,GO:0005774,GO:0005886,GO:0006810,GO:0006811,GO:0006812,GO:0006813,GO:0006814,GO:0006873,GO:0006885,GO:0006950,GO:0006970,GO:0007275,GO:0008150,GO:0008324,GO:0009628,GO:0009651,GO:0009987,GO:0010107,GO:0010119,GO:0015075,GO:0015077,GO:0015078,GO:0015079,GO:0015081,GO:0015291,GO:0015297,GO:0015298,GO:…	-	ko:K14724	-	-	-	-	ko00000,ko02000	2.A.36.1.12,2.A.36.1.9	-	Na_H_Exchanger
Ssa01000114.t2	3827.XP_004495768.1	6.5e-304	838	COG0025@1|root,KOG1965@2759|Eukaryota,37KWA@33090|Viridiplantae,3GC66@35493|Streptophyta,4JJT6@91835|fabids	35493|Streptophyta	P	Sodium hydrogen exchanger	NHX1	GO:0000325,GO:0003674,GO:0005215,GO:0005451,GO:0005575,GO:0005622,GO:0005623,GO:0005737,GO:0005773,GO:0005774,GO:0005886,GO:0006810,GO:0006811,GO:0006812,GO:0006813,GO:0006814,GO:0006873,GO:0006885,GO:0006950,GO:0006970,GO:0007275,GO:0008150,GO:0008324,GO:0009628,GO:0009651,GO:0009987,GO:0010107,GO:0010119,GO:0015075,GO:0015077,GO:0015078,GO:0015079,GO:0015081,GO:0015291,GO:0015297,GO:0015298,GO:…	-	ko:K14724	-	-	-	-	ko00000,ko02000	2.A.36.1.12,2.A.36.1.9	-	Na_H_Exchanger
Ssa01000115.t1	3885.XP_007147112.1	1.45e-97	284	COG2032@1|root,KOG0441@2759|Eukaryota,37TSP@33090|Viridiplantae,3GI46@35493|Streptophyta,4JNVN@91835|fabids	35493|Streptophyta	P	Destroys radicals which are normally produced within the cells and which are toxic to biological systems	CSD1	GO:0000302,GO:0000303,GO:0000305,GO:0001101,GO:0003674,GO:0003824,GO:0004784,GO:0005488,GO:0005507,GO:0005575,GO:0005576,GO:0005615,GO:0005622,GO:0005623,GO:0005634,GO:0005737,GO:0005829,GO:0006801,GO:0006950,GO:0006952,GO:0006970,GO:0006979,GO:0008150,GO:0008152,GO:0008270,GO:0009314,GO:0009411,GO:0009416,GO:0009605,GO:0009607,GO:0009617,GO:0009628,GO:0009636,GO:0009642,GO:0009651,GO:0009743,GO:…	1.15.1.1	ko:K04565	ko04146,ko04213,ko05014,ko05016,ko05020,map04146,map04213,map05014,map05016,map05020	-	-	-	ko00000,ko00001,ko01000	-	-	Sod_Cu
Ssa01000116.t1	3880.AES82578	3.33e-169	506	28HNX@1|root,2QVZK@2759|Eukaryota,37Q2C@33090|Viridiplantae,3GESC@35493|Streptophyta,4JRN8@91835|fabids	35493|Streptophyta	-	-	-	-	-	-	-	-	-	-	-	-	-	-
Ssa01000117.t1	3827.XP_004495767.1	8.57e-159	451	KOG4536@1|root,KOG4536@2759|Eukaryota,37RYT@33090|Viridiplantae,3GGWP@35493|Streptophyta,4JEBU@91835|fabids	35493|Streptophyta	S	Predicted membrane protein	-	-	-	-	-	-	-	-	-	-	-	Tmemb_40
Ssa01000117.t2	3827.XP_004495767.1	6.43e-156	444	KOG4536@1|root,KOG4536@2759|Eukaryota,37RYT@33090|Viridiplantae,3GGWP@35493|Streptophyta,4JEBU@91835|fabids	35493|Streptophyta	S	Predicted membrane protein	-	-	-	-	-	-	-	-	-	-	-	Tmemb_40
Ssa01000118.t1	3847.GLYMA10G30000.2	6.67e-50	162	COG0236@1|root,KOG1748@2759|Eukaryota,37VG8@33090|Viridiplantae,3GJEV@35493|Streptophyta,4JQS1@91835|fabids	35493|Streptophyta	CIQ	Carrier of the growing fatty acid chain in fatty acid biosynthesis	-	GO:0000035,GO:0000036,GO:0003674,GO:0005488,GO:0005575,GO:0005622,GO:0005623,GO:0005737,GO:0005829,GO:0005975,GO:0006082,GO:0006629,GO:0006631,GO:0006633,GO:0006643,GO:0006644,GO:0006664,GO:0006793,GO:0006796,GO:0006950,GO:0006970,GO:0008150,GO:0008152,GO:0008610,GO:0008654,GO:0009058,GO:0009245,GO:0009247,GO:0009311,GO:0009312,GO:0009507,GO:0009536,GO:0009628,GO:0009651,GO:0009987,GO:0016051,GO:…	-	-	-	-	-	-	-	-	-	PP-binding
Ssa01000119.t1	3885.XP_007144779.1	2.92e-95	297	COG5066@1|root,KOG0439@2759|Eukaryota,37K1D@33090|Viridiplantae,3GFA4@35493|Streptophyta,4JPAT@91835|fabids	35493|Streptophyta	U	Vesicle-associated protein	VAP27-2	GO:0005575,GO:0005622,GO:0005623,GO:0005737,GO:0005783,GO:0005789,GO:0005886,GO:0006810,GO:0008150,GO:0012505,GO:0016020,GO:0031984,GO:0042175,GO:0043226,GO:0043227,GO:0043229,GO:0043231,GO:0044422,GO:0044424,GO:0044425,GO:0044432,GO:0044444,GO:0044446,GO:0044464,GO:0046907,GO:0051179,GO:0051234,GO:0051641,GO:0051649,GO:0071944,GO:0098827	-	-	-	-	-	-	-	-	-	Motile_Sperm
Ssa01000120.t1	3885.XP_007147106.1	2.13e-110	318	KOG3316@1|root,KOG3316@2759|Eukaryota,37KIF@33090|Viridiplantae,3GE54@35493|Streptophyta,4JRB7@91835|fabids	35493|Streptophyta	U	Trafficking protein particle complex subunit	-	-	-	ko:K20304	-	-	-	-	ko00000,ko04131	-	-	TRAPP
Ssa01000121.t2	3885.XP_007144772.1	2.08e-180	515	COG5333@1|root,KOG0835@2759|Eukaryota,37HXR@33090|Viridiplantae,3GECK@35493|Streptophyta,4JIX0@91835|fabids	35493|Streptophyta	D	Belongs to the cyclin family	-	GO:0000079,GO:0000307,GO:0001932,GO:0001934,GO:0003674,GO:0005575,GO:0005622,GO:0005623,GO:0005634,GO:0005911,GO:0006355,GO:0006357,GO:0006950,GO:0006970,GO:0008150,GO:0009506,GO:0009628,GO:0009651,GO:0009889,GO:0009891,GO:0009893,GO:0010468,GO:0010556,GO:0010557,GO:0010562,GO:0010604,GO:0010628,GO:0016538,GO:0019207,GO:0019219,GO:0019220,GO:0019222,GO:0019887,GO:0030054,GO:0030234,GO:0031323,GO:…	-	-	-	-	-	-	-	-	-	Cyclin_N
Ssa01000121.t1	3885.XP_007144772.1	1.28e-219	617	COG5333@1|root,KOG0835@2759|Eukaryota,37HXR@33090|Viridiplantae,3GECK@35493|Streptophyta,4JIX0@91835|fabids	35493|Streptophyta	D	Belongs to the cyclin family	-	GO:0000079,GO:0000307,GO:0001932,GO:0001934,GO:0003674,GO:0005575,GO:0005622,GO:0005623,GO:0005634,GO:0005911,GO:0006355,GO:0006357,GO:0006950,GO:0006970,GO:0008150,GO:0009506,GO:0009628,GO:0009651,GO:0009889,GO:0009891,GO:0009893,GO:0010468,GO:0010556,GO:0010557,GO:0010562,GO:0010604,GO:0010628,GO:0016538,GO:0019207,GO:0019219,GO:0019220,GO:0019222,GO:0019887,GO:0030054,GO:0030234,GO:0031323,GO:…	-	-	-	-	-	-	-	-	-	Cyclin_N
Ssa01000121.t3	3885.XP_007144772.1	3.45e-216	608	COG5333@1|root,KOG0835@2759|Eukaryota,37HXR@33090|Viridiplantae,3GECK@35493|Streptophyta,4JIX0@91835|fabids	35493|Streptophyta	D	Belongs to the cyclin family	-	GO:0000079,GO:0000307,GO:0001932,GO:0001934,GO:0003674,GO:0005575,GO:0005622,GO:0005623,GO:0005634,GO:0005911,GO:0006355,GO:0006357,GO:0006950,GO:0006970,GO:0008150,GO:0009506,GO:0009628,GO:0009651,GO:0009889,GO:0009891,GO:0009893,GO:0010468,GO:0010556,GO:0010557,GO:0010562,GO:0010604,GO:0010628,GO:0016538,GO:0019207,GO:0019219,GO:0019220,GO:0019222,GO:0019887,GO:0030054,GO:0030234,GO:0031323,GO:…	-	-	-	-	-	-	-	-	-	Cyclin_N
Ssa01000122.t1	3847.GLYMA19G42780.1	8.11e-237	656	COG5273@1|root,KOG1312@2759|Eukaryota,37S7E@33090|Viridiplantae,3GAIG@35493|Streptophyta,4JJER@91835|fabids	35493|Streptophyta	S	Belongs to the DHHC palmitoyltransferase family	-	-	2.3.1.225	ko:K20003	-	-	-	-	ko00000,ko01000,ko04131	-	-	DHHC
Ssa01000123.t2	3885.XP_007147094.1	5.26e-150	429	2CMWD@1|root,2QSD6@2759|Eukaryota,37JFF@33090|Viridiplantae,3GB6F@35493|Streptophyta,4JFPW@91835|fabids	35493|Streptophyta	-	-	-	-	-	-	-	-	-	-	-	-	-	-
Ssa01000123.t1	3641.EOY11250	2.05e-180	509	2CMWD@1|root,2QSD6@2759|Eukaryota,37JFF@33090|Viridiplantae,3GB6F@35493|Streptophyta	35493|Streptophyta	-	-	-	-	-	-	-	-	-	-	-	-	-	-
Ssa01000124.t1	3847.GLYMA19G42760.1	5.65e-87	256	COG5262@1|root,KOG1756@2759|Eukaryota,37TYG@33090|Viridiplantae,3GHZZ@35493|Streptophyta,4JP3T@91835|fabids	35493|Streptophyta	B	Belongs to the histone H2A family	-	GO:0005575,GO:0005622,GO:0005623,GO:0005634,GO:0005694,GO:0043226,GO:0043227,GO:0043228,GO:0043229,GO:0043231,GO:0043232,GO:0044424,GO:0044464	-	ko:K11251	ko04217,ko05034,ko05322,map04217,map05034,map05322	-	-	-	ko00000,ko00001,ko03036,ko04147	-	-	Histone,Histone_H2A_C
Ssa01000125.t1	3983.cassava4.1_018306m	5.63e-72	219	KOG4747@1|root,KOG4747@2759|Eukaryota,37TV3@33090|Viridiplantae,3GX5N@35493|Streptophyta,4JVY4@91835|fabids	35493|Streptophyta	T	Histidine-containing phosphotransfer protein 1-like	-	-	-	ko:K14490	ko04075,map04075	-	-	-	ko00000,ko00001	-	-	Hpt
Ssa01000127.t1	3827.XP_004495754.1	3.61e-162	459	28M0P@1|root,2QTHF@2759|Eukaryota,37PZZ@33090|Viridiplantae,3GBYI@35493|Streptophyta,4JJIS@91835|fabids	35493|Streptophyta	S	Phosphoglycerate mutase family	-	GO:0003674,GO:0003824,GO:0005575,GO:0005622,GO:0005623,GO:0005737,GO:0005829,GO:0005975,GO:0006793,GO:0006796,GO:0008150,GO:0008152,GO:0009987,GO:0016311,GO:0016787,GO:0016788,GO:0016791,GO:0042578,GO:0044237,GO:0044238,GO:0044424,GO:0044444,GO:0044464,GO:0071704	-	-	-	-	-	-	-	-	-	His_Phos_1
Ssa01000128.t1	3880.AES82542	2.88e-279	777	KOG0021@1|root,KOG0021@2759|Eukaryota,37MWP@33090|Viridiplantae,3GDRX@35493|Streptophyta,4JD6T@91835|fabids	35493|Streptophyta	Q	Glutathione synthetase	GSH2	GO:0000166,GO:0000287,GO:0001101,GO:0003674,GO:0003824,GO:0004363,GO:0005488,GO:0005515,GO:0005524,GO:0005575,GO:0005622,GO:0005623,GO:0005737,GO:0005829,GO:0006082,GO:0006518,GO:0006520,GO:0006575,GO:0006749,GO:0006750,GO:0006790,GO:0006807,GO:0008144,GO:0008150,GO:0008152,GO:0009058,GO:0009507,GO:0009536,GO:0009719,GO:0009725,GO:0009753,GO:0009987,GO:0010033,GO:0016874,GO:0016879,GO:0016881,GO:…	3.1.26.5,6.3.2.3	ko:K03539,ko:K21456	ko00270,ko00480,ko01100,ko03008,ko03013,ko04216,map00270,map00480,map01100,map03008,map03013,map04216	M00118	R00497,R10994	RC00096,RC00141	ko00000,ko00001,ko00002,ko01000,ko03009,ko03016,ko03029,ko04147	-	-	GSH_synth_ATP
Ssa01000129.t1	3827.XP_004494637.1	1.08e-238	660	28K72@1|root,2QRTJ@2759|Eukaryota,37QQH@33090|Viridiplantae,3GDIV@35493|Streptophyta,4JSFR@91835|fabids	35493|Streptophyta	S	Belongs to the 'GDSL' lipolytic enzyme family	-	-	3.1.1.80	ko:K21026	ko00901,ko01110,map00901,map01110	-	R05880	RC00055,RC00523	ko00000,ko00001,ko01000	-	-	Lipase_GDSL
Ssa01000129.t2	3885.XP_007147074.1	4.5e-244	674	28K72@1|root,2QRTJ@2759|Eukaryota,37QQH@33090|Viridiplantae,3GDIV@35493|Streptophyta,4JSFR@91835|fabids	35493|Streptophyta	S	Belongs to the 'GDSL' lipolytic enzyme family	-	-	3.1.1.80	ko:K21026	ko00901,ko01110,map00901,map01110	-	R05880	RC00055,RC00523	ko00000,ko00001,ko01000	-	-	Lipase_GDSL
Ssa01000130.t1	3847.GLYMA20G37550.1	1.98e-100	304	28KFD@1|root,2QQRC@2759|Eukaryota,37HRG@33090|Viridiplantae,3GEQM@35493|Streptophyta,4JKJ7@91835|fabids	35493|Streptophyta	K	transcription factor	-	-	-	-	-	-	-	-	-	-	-	HLH
Ssa01000130.t2	3847.GLYMA20G37550.1	8.66e-100	304	28KFD@1|root,2QQRC@2759|Eukaryota,37HRG@33090|Viridiplantae,3GEQM@35493|Streptophyta,4JKJ7@91835|fabids	35493|Streptophyta	K	transcription factor	-	-	-	-	-	-	-	-	-	-	-	HLH
Ssa01000131.t1	3847.GLYMA10G29750.1	2.92e-155	450	KOG0800@1|root,KOG0800@2759|Eukaryota,37N1U@33090|Viridiplantae,3GEMX@35493|Streptophyta,4JIT7@91835|fabids	35493|Streptophyta	O	E3 ubiquitin-protein ligase	-	GO:0001101,GO:0002376,GO:0003674,GO:0003824,GO:0004842,GO:0005575,GO:0005623,GO:0005886,GO:0006464,GO:0006508,GO:0006511,GO:0006807,GO:0006950,GO:0006952,GO:0006955,GO:0007154,GO:0008150,GO:0008152,GO:0009056,GO:0009057,GO:0009605,GO:0009607,GO:0009617,GO:0009719,GO:0009725,GO:0009737,GO:0009814,GO:0009816,GO:0009987,GO:0009991,GO:0010033,GO:0010200,GO:0010243,GO:0010498,GO:0016020,GO:0016567,GO:…	2.3.2.27	ko:K10664	-	-	-	-	ko00000,ko01000,ko04121	-	-	zf-RING_2
Ssa01000132.t2	3880.AES61326	6.37e-183	522	COG5241@1|root,KOG2841@2759|Eukaryota,37KXJ@33090|Viridiplantae,3GD14@35493|Streptophyta,4JJXK@91835|fabids	35493|Streptophyta	L	DNA excision repair protein	-	GO:0000003,GO:0000014,GO:0000109,GO:0000110,GO:0000710,GO:0000724,GO:0000725,GO:0003674,GO:0003676,GO:0003677,GO:0003684,GO:0003697,GO:0003824,GO:0004518,GO:0004519,GO:0004520,GO:0004536,GO:0005488,GO:0005575,GO:0005622,GO:0005623,GO:0005634,GO:0006139,GO:0006259,GO:0006281,GO:0006289,GO:0006294,GO:0006296,GO:0006298,GO:0006302,GO:0006310,GO:0006312,GO:0006725,GO:0006807,GO:0006950,GO:0006974,GO:…	-	ko:K10849	ko01524,ko03420,ko03460,map01524,map03420,map03460	-	-	-	ko00000,ko00001,ko03400	-	-	HHH_2,HHH_5,Rad10
Ssa01000132.t1	3880.AES61326	4.76e-183	521	COG5241@1|root,KOG2841@2759|Eukaryota,37KXJ@33090|Viridiplantae,3GD14@35493|Streptophyta,4JJXK@91835|fabids	35493|Streptophyta	L	DNA excision repair protein	-	GO:0000003,GO:0000014,GO:0000109,GO:0000110,GO:0000710,GO:0000724,GO:0000725,GO:0003674,GO:0003676,GO:0003677,GO:0003684,GO:0003697,GO:0003824,GO:0004518,GO:0004519,GO:0004520,GO:0004536,GO:0005488,GO:0005575,GO:0005622,GO:0005623,GO:0005634,GO:0006139,GO:0006259,GO:0006281,GO:0006289,GO:0006294,GO:0006296,GO:0006298,GO:0006302,GO:0006310,GO:0006312,GO:0006725,GO:0006807,GO:0006950,GO:0006974,GO:…	-	ko:K10849	ko01524,ko03420,ko03460,map01524,map03420,map03460	-	-	-	ko00000,ko00001,ko03400	-	-	HHH_2,HHH_5,Rad10
Ssa01000133.t1	3847.GLYMA20G37580.2	2.27e-215	606	COG0515@1|root,KOG1187@2759|Eukaryota,37S79@33090|Viridiplantae,3G98A@35493|Streptophyta,4JEQT@91835|fabids	35493|Streptophyta	T	Serine threonine-protein kinase	-	-	2.7.11.1	ko:K04733	ko04010,ko04064,ko04620,ko04621,ko04624,ko04722,ko05133,ko05140,ko05142,ko05145,ko05152,ko05162,ko05164,map04010,map04064,map04620,map04621,map04624,map04722,map05133,map05140,map05142,map05145,map05152,map05162,map05164	M00686	-	-	ko00000,ko00001,ko00002,ko01000,ko01001	-	-	Pkinase,Pkinase_Tyr
Ssa01000134.t1	3847.GLYMA03G39950.2	1.99e-69	235	KOG1603@1|root,KOG1603@2759|Eukaryota,37SI8@33090|Viridiplantae,3GAYJ@35493|Streptophyta,4JVKY@91835|fabids	35493|Streptophyta	P	Heavy-metal-associated domain	-	-	-	-	-	-	-	-	-	-	-	HMA
Ssa01000135.t1	3827.XP_004494958.1	2.42e-164	476	KOG1339@1|root,KOG1339@2759|Eukaryota,37PX6@33090|Viridiplantae,3GE49@35493|Streptophyta,4JNJM@91835|fabids	35493|Streptophyta	O	Basic 7S	-	GO:0003674,GO:0003824,GO:0004175,GO:0004190,GO:0005488,GO:0005515,GO:0006508,GO:0006807,GO:0008150,GO:0008152,GO:0008233,GO:0009056,GO:0009057,GO:0016787,GO:0019538,GO:0030163,GO:0042802,GO:0043170,GO:0044238,GO:0070001,GO:0070011,GO:0071704,GO:0140096,GO:1901564,GO:1901565,GO:1901575	-	-	-	-	-	-	-	-	-	TAXi_C,TAXi_N
Ssa01000136.t1	3827.XP_004513803.1	4.53e-106	307	KOG3372@1|root,KOG3372@2759|Eukaryota,37STV@33090|Viridiplantae,3G71J@35493|Streptophyta,4JG6Q@91835|fabids	35493|Streptophyta	U	Signal peptidase complex subunit	-	GO:0003674,GO:0003824,GO:0005575,GO:0005618,GO:0005622,GO:0005623,GO:0005737,GO:0005783,GO:0005787,GO:0005789,GO:0006465,GO:0006508,GO:0006518,GO:0006605,GO:0006807,GO:0006810,GO:0006886,GO:0008104,GO:0008150,GO:0008152,GO:0008233,GO:0009987,GO:0010467,GO:0012505,GO:0015031,GO:0015833,GO:0016020,GO:0016485,GO:0016787,GO:0019538,GO:0030312,GO:0031984,GO:0032991,GO:0033036,GO:0033365,GO:0034613,GO:…	-	ko:K12948	ko03060,map03060	-	-	-	ko00000,ko00001,ko01000	-	-	SPC22
Ssa01000137.t1	3847.GLYMA02G40310.1	3.19e-158	447	COG1601@1|root,KOG2768@2759|Eukaryota,37II7@33090|Viridiplantae,3GGJQ@35493|Streptophyta,4JMNA@91835|fabids	35493|Streptophyta	J	Eukaryotic translation initiation factor 2 subunit	-	GO:0005575,GO:0005623,GO:0005886,GO:0016020,GO:0044464,GO:0071944	-	ko:K03238	ko03013,map03013	-	-	-	ko00000,ko00001,ko01009,ko03012	-	-	eIF-5_eIF-2B
Ssa01000138.t1	3827.XP_004494629.1	1.7e-78	250	COG5208@1|root,KOG1657@2759|Eukaryota,37QDI@33090|Viridiplantae,3GBKB@35493|Streptophyta,4JJN9@91835|fabids	35493|Streptophyta	K	Nuclear transcription factor Y subunit	-	GO:0000003,GO:0001101,GO:0003006,GO:0003674,GO:0003676,GO:0003677,GO:0003700,GO:0003712,GO:0005488,GO:0005575,GO:0005622,GO:0005623,GO:0005634,GO:0005737,GO:0005829,GO:0006355,GO:0007154,GO:0007165,GO:0007275,GO:0008150,GO:0009314,GO:0009416,GO:0009628,GO:0009648,GO:0009719,GO:0009725,GO:0009737,GO:0009738,GO:0009739,GO:0009740,GO:0009755,GO:0009791,GO:0009889,GO:0009987,GO:0010029,GO:0010033,GO:…	-	ko:K08066	ko04612,ko05152,map04612,map05152	-	-	-	ko00000,ko00001,ko03000	-	-	CBFD_NFYB_HMF
Ssa01000139.t1	3847.GLYMA03G39895.1	1.2e-54	177	2EP3I@1|root,2SSCU@2759|Eukaryota,380RH@33090|Viridiplantae,3GQ4C@35493|Streptophyta,4JUFV@91835|fabids	35493|Streptophyta	-	-	-	-	-	-	-	-	-	-	-	-	-	-
Ssa01000140.t1	3847.GLYMA03G39890.1	1.98e-223	622	COG1577@1|root,KOG1511@2759|Eukaryota,37ISH@33090|Viridiplantae,3GEMJ@35493|Streptophyta,4JDUB@91835|fabids	35493|Streptophyta	I	Mevalonate	-	GO:0000166,GO:0000287,GO:0003674,GO:0003824,GO:0004496,GO:0005488,GO:0005524,GO:0005575,GO:0005622,GO:0005623,GO:0005737,GO:0005829,GO:0006084,GO:0006139,GO:0006163,GO:0006629,GO:0006637,GO:0006644,GO:0006720,GO:0006725,GO:0006732,GO:0006753,GO:0006790,GO:0006793,GO:0006796,GO:0006807,GO:0008144,GO:0008150,GO:0008152,GO:0008202,GO:0008299,GO:0008610,GO:0008654,GO:0009058,GO:0009117,GO:0009150,GO:…	2.7.1.36	ko:K00869	ko00900,ko01100,ko01110,ko01130,ko04146,map00900,map01100,map01110,map01130,map04146	M00095	R02245	RC00002,RC00017	ko00000,ko00001,ko00002,ko01000	-	-	GHMP_kinases_C,GHMP_kinases_N
Ssa01000142.t1	3847.GLYMA20G37670.1	1.75e-114	334	COG1028@1|root,KOG0725@2759|Eukaryota,37HIG@33090|Viridiplantae,3GG6F@35493|Streptophyta,4JMG8@91835|fabids	35493|Streptophyta	Q	Glucose and ribitol	-	-	-	-	-	-	-	-	-	-	-	adh_short_C2
Ssa01000146.t1	3880.AES61208	7.96e-75	240	2D3PM@1|root,2S50T@2759|Eukaryota,3809E@33090|Viridiplantae,3GJNV@35493|Streptophyta,4JUGH@91835|fabids	35493|Streptophyta	S	Myb SANT-like DNA-binding domain protein	-	-	-	-	-	-	-	-	-	-	-	Myb_DNA-bind_3
Ssa01000147.t1	3983.cassava4.1_008149m	8.55e-104	320	2CNGR@1|root,2QW71@2759|Eukaryota,37TK0@33090|Viridiplantae,3GG0I@35493|Streptophyta,4JN32@91835|fabids	35493|Streptophyta	S	f-box protein	-	GO:0000724,GO:0000725,GO:0003674,GO:0003676,GO:0003677,GO:0003678,GO:0003824,GO:0004003,GO:0004386,GO:0005488,GO:0005575,GO:0005622,GO:0005623,GO:0005634,GO:0005694,GO:0005737,GO:0006139,GO:0006259,GO:0006260,GO:0006281,GO:0006284,GO:0006302,GO:0006310,GO:0006464,GO:0006725,GO:0006807,GO:0006950,GO:0006974,GO:0006996,GO:0008026,GO:0008094,GO:0008150,GO:0008152,GO:0009058,GO:0009059,GO:0009378,GO:…	-	-	-	-	-	-	-	-	-	DUF295,F-box,F-box-like
Ssa01000148.t1	3694.POPTR_0013s02430.1	3.5e-173	486	KOG3114@1|root,KOG3114@2759|Eukaryota,37RVT@33090|Viridiplantae,3GAKV@35493|Streptophyta,4JFMM@91835|fabids	35493|Streptophyta	S	Protein YIPF1 homolog	-	-	-	-	-	-	-	-	-	-	-	Yip1
Ssa01000149.t1	3847.GLYMA19G42380.1	6.94e-234	663	COG5597@1|root,KOG1950@2759|Eukaryota,37I6T@33090|Viridiplantae,3GD9F@35493|Streptophyta,4JNJ5@91835|fabids	35493|Streptophyta	G	Belongs to the glycosyltransferase 8 family	-	GO:0003674,GO:0003824,GO:0005575,GO:0005622,GO:0005623,GO:0005737,GO:0005794,GO:0008194,GO:0012505,GO:0015020,GO:0016740,GO:0016757,GO:0016758,GO:0043226,GO:0043227,GO:0043229,GO:0043231,GO:0044424,GO:0044444,GO:0044464	-	ko:K20890	-	-	-	-	ko00000,ko01000,ko01003	-	GT8	Glyco_transf_8
Ssa01000150.t1	3847.GLYMA10G29550.1	0	1659	COG3250@1|root,KOG2230@2759|Eukaryota,37J81@33090|Viridiplantae,3GFRK@35493|Streptophyta,4JEFW@91835|fabids	35493|Streptophyta	G	Mannosylglycoprotein	-	GO:0005575,GO:0005622,GO:0005623,GO:0005737,GO:0005773,GO:0043226,GO:0043227,GO:0043229,GO:0043231,GO:0044424,GO:0044444,GO:0044464	3.2.1.152	ko:K18577	-	-	-	-	ko00000,ko01000	-	GH2	Glyco_hydro_2,Glyco_hydro_2_C
Ssa01000150.t2	3847.GLYMA20G37760.1	0	1460	COG3250@1|root,KOG2230@2759|Eukaryota,37J81@33090|Viridiplantae,3GFRK@35493|Streptophyta,4JEFW@91835|fabids	35493|Streptophyta	G	Mannosylglycoprotein	-	GO:0005575,GO:0005622,GO:0005623,GO:0005737,GO:0005773,GO:0043226,GO:0043227,GO:0043229,GO:0043231,GO:0044424,GO:0044444,GO:0044464	3.2.1.152	ko:K18577	-	-	-	-	ko00000,ko01000	-	GH2	Glyco_hydro_2,Glyco_hydro_2_C
Ssa01000151.t1	102107.XP_008246470.1	2.96e-171	486	28J60@1|root,2QRI3@2759|Eukaryota,37KCF@33090|Viridiplantae,3GAYE@35493|Streptophyta,4JKNM@91835|fabids	35493|Streptophyta	S	Domain of unknown function (DUF1995)	-	-	-	-	-	-	-	-	-	-	-	DUF1995
Ssa01000152.t1	3827.XP_004495726.1	5.84e-111	326	KOG2850@1|root,KOG2850@2759|Eukaryota,37ICJ@33090|Viridiplantae,3GBZP@35493|Streptophyta,4JFSZ@91835|fabids	35493|Streptophyta	S	f-box protein	-	-	-	-	-	-	-	-	-	-	-	F-box,F-box-like,LysM
Ssa01000153.t1	3847.GLYMA03G39730.1	0	1368	2CNE6@1|root,2QVKD@2759|Eukaryota,38A0H@33090|Viridiplantae,3GXAV@35493|Streptophyta,4JW13@91835|fabids	35493|Streptophyta	E	Plant lipoxygenase may be involved in a number of diverse aspects of plant physiology including growth and development, pest resistance, and senescence or responses to wounding	LOX4	GO:0003674,GO:0003824,GO:0005575,GO:0005622,GO:0005623,GO:0005737,GO:0008150,GO:0008152,GO:0016165,GO:0016491,GO:0016701,GO:0016702,GO:0044424,GO:0044464,GO:0051213,GO:0055114	1.13.11.12,1.13.11.58	ko:K00454,ko:K15718	ko00591,ko00592,ko01100,ko01110,map00591,map00592,map01100,map01110	M00113	R03626,R07057,R07864,R07869	RC00561	ko00000,ko00001,ko00002,ko01000	-	-	Lipoxygenase,PLAT
Ssa01000154.t2	3847.GLYMA03G39720.1	0	2513	COG0417@1|root,KOG0968@2759|Eukaryota,37RRF@33090|Viridiplantae,3GCAV@35493|Streptophyta,4JF38@91835|fabids	35493|Streptophyta	L	DNA polymerase	-	GO:0000731,GO:0005575,GO:0005622,GO:0005623,GO:0005634,GO:0006139,GO:0006259,GO:0006281,GO:0006301,GO:0006725,GO:0006807,GO:0006950,GO:0006974,GO:0008150,GO:0008152,GO:0009058,GO:0009059,GO:0009314,GO:0009411,GO:0009416,GO:0009628,GO:0009987,GO:0010225,GO:0016035,GO:0018130,GO:0019438,GO:0019985,GO:0032991,GO:0033554,GO:0034641,GO:0034644,GO:0034645,GO:0034654,GO:0042276,GO:0042575,GO:0043170,GO:…	2.7.7.7	ko:K02350	ko01100,ko01524,ko03460,map01100,map01524,map03460	M00293	-	-	ko00000,ko00001,ko00002,ko01000,ko03400	-	-	DNA_pol_B,DNA_pol_B_exo1,RVT_2,zf-C4pol,zf-RanBP
Ssa01000154.t1	3847.GLYMA03G39720.1	0	2146	COG0417@1|root,KOG0968@2759|Eukaryota,37RRF@33090|Viridiplantae,3GCAV@35493|Streptophyta,4JF38@91835|fabids	35493|Streptophyta	L	DNA polymerase	-	GO:0000731,GO:0005575,GO:0005622,GO:0005623,GO:0005634,GO:0006139,GO:0006259,GO:0006281,GO:0006301,GO:0006725,GO:0006807,GO:0006950,GO:0006974,GO:0008150,GO:0008152,GO:0009058,GO:0009059,GO:0009314,GO:0009411,GO:0009416,GO:0009628,GO:0009987,GO:0010225,GO:0016035,GO:0018130,GO:0019438,GO:0019985,GO:0032991,GO:0033554,GO:0034641,GO:0034644,GO:0034645,GO:0034654,GO:0042276,GO:0042575,GO:0043170,GO:…	2.7.7.7	ko:K02350	ko01100,ko01524,ko03460,map01100,map01524,map03460	M00293	-	-	ko00000,ko00001,ko00002,ko01000,ko03400	-	-	DNA_pol_B,DNA_pol_B_exo1,RVT_2,zf-C4pol,zf-RanBP
Ssa01000155.t1	102107.XP_008246397.1	4.1e-191	536	COG5333@1|root,KOG2496@2759|Eukaryota,37HSZ@33090|Viridiplantae,3G8BQ@35493|Streptophyta,4JNSN@91835|fabids	35493|Streptophyta	DKL	Belongs to the cyclin family	-	GO:0000079,GO:0000307,GO:0001101,GO:0001932,GO:0001934,GO:0003674,GO:0003824,GO:0004672,GO:0005575,GO:0005622,GO:0005623,GO:0005634,GO:0005737,GO:0006355,GO:0006357,GO:0006464,GO:0006468,GO:0006793,GO:0006796,GO:0006807,GO:0006950,GO:0008150,GO:0008152,GO:0009314,GO:0009414,GO:0009415,GO:0009416,GO:0009628,GO:0009637,GO:0009889,GO:0009891,GO:0009893,GO:0009987,GO:0010035,GO:0010118,GO:0010119,GO:…	-	ko:K06634	ko03022,ko03420,ko04110,map03022,map03420,map04110	M00290	-	-	ko00000,ko00001,ko00002,ko03021,ko03400	-	-	Cyclin_C_2,Cyclin_N
Ssa01000156.t1	3847.GLYMA20G37850.2	3.11e-24	100	2E25A@1|root,2S9DT@2759|Eukaryota,37X6G@33090|Viridiplantae,3GM48@35493|Streptophyta	35493|Streptophyta	-	-	-	-	-	-	-	-	-	-	-	-	-	-
Ssa01000157.t1	3847.GLYMA10G29440.2	8.64e-52	168	COG2036@1|root,KOG0869@2759|Eukaryota,37V03@33090|Viridiplantae,3GJ3I@35493|Streptophyta,4JQ7K@91835|fabids	35493|Streptophyta	K	Nuclear transcription factor Y subunit	-	GO:0003674,GO:0003700,GO:0006355,GO:0008150,GO:0009889,GO:0010468,GO:0010556,GO:0019219,GO:0019222,GO:0031323,GO:0031326,GO:0050789,GO:0050794,GO:0051171,GO:0051252,GO:0060255,GO:0065007,GO:0080090,GO:0140110,GO:1903506,GO:2000112,GO:2001141	-	ko:K08065	ko04612,ko05152,ko05166,map04612,map05152,map05166	-	-	-	ko00000,ko00001,ko03000	-	-	CBFD_NFYB_HMF
Ssa01000158.t1	3847.GLYMA08G46055.3	2.38e-264	767	28IIN@1|root,2QQVN@2759|Eukaryota,37KSV@33090|Viridiplantae,3GC1H@35493|Streptophyta,4JRDK@91835|fabids	35493|Streptophyta	S	BEST Arabidopsis thaliana protein match is	-	-	-	-	-	-	-	-	-	-	-	-
Ssa01000159.t1	3885.XP_007144938.1	1.47e-221	628	KOG1721@1|root,KOG1721@2759|Eukaryota,37IIZ@33090|Viridiplantae,3GA7V@35493|Streptophyta,4JMS5@91835|fabids	35493|Streptophyta	S	ZINC FINGER protein	-	-	-	-	-	-	-	-	-	-	-	zf-C2H2,zf-C2H2_jaz
Ssa01000160.t1	3847.GLYMA19G42270.1	0	1064	COG4281@1|root,KOG0379@1|root,KOG0379@2759|Eukaryota,KOG0817@2759|Eukaryota,37P38@33090|Viridiplantae,3G8X2@35493|Streptophyta,4JH5G@91835|fabids	35493|Streptophyta	I	acyl-CoA-binding domain-containing protein	-	GO:0000062,GO:0000166,GO:0001101,GO:0003674,GO:0005488,GO:0005575,GO:0005622,GO:0005623,GO:0005634,GO:0005737,GO:0005829,GO:0006810,GO:0006869,GO:0008150,GO:0009314,GO:0009416,GO:0009628,GO:0009719,GO:0009723,GO:0009725,GO:0009753,GO:0010033,GO:0010876,GO:0017076,GO:0030554,GO:0032553,GO:0032555,GO:0032559,GO:0033036,GO:0033218,GO:0036094,GO:0042221,GO:0043167,GO:0043168,GO:0043226,GO:0043227,GO:…	-	-	-	-	-	-	-	-	-	ACBP,Kelch_3,Kelch_4,Kelch_5,Kelch_6
Ssa01000161.t1	3880.AES61388	1.45e-206	580	KOG2111@1|root,KOG2111@2759|Eukaryota,37QUP@33090|Viridiplantae,3GCWW@35493|Streptophyta,4JTG4@91835|fabids	35493|Streptophyta	S	WD repeat domain phosphoinositide-interacting protein	-	GO:0000045,GO:0000407,GO:0000422,GO:0003674,GO:0005488,GO:0005543,GO:0005575,GO:0005622,GO:0005623,GO:0005737,GO:0005829,GO:0006464,GO:0006497,GO:0006807,GO:0006914,GO:0006996,GO:0007005,GO:0007033,GO:0008104,GO:0008150,GO:0008152,GO:0008289,GO:0009056,GO:0009058,GO:0009059,GO:0009987,GO:0016020,GO:0016043,GO:0016236,GO:0019538,GO:0019898,GO:0022411,GO:0022607,GO:0032266,GO:0033036,GO:0034045,GO:…	-	-	-	-	-	-	-	-	-	WD40
Ssa01000162.t1	102107.XP_008246411.1	6.77e-65	201	COG5262@1|root,KOG1756@2759|Eukaryota,37TUU@33090|Viridiplantae,3GIXS@35493|Streptophyta,4JPX9@91835|fabids	35493|Streptophyta	B	Histone H2A	-	GO:0000228,GO:0000785,GO:0000790,GO:0000792,GO:0003674,GO:0003676,GO:0003677,GO:0003682,GO:0005488,GO:0005575,GO:0005622,GO:0005623,GO:0005634,GO:0005694,GO:0005730,GO:0006325,GO:0006342,GO:0006355,GO:0006996,GO:0008150,GO:0009889,GO:0009890,GO:0009892,GO:0009987,GO:0010468,GO:0010556,GO:0010558,GO:0010605,GO:0010629,GO:0016043,GO:0016458,GO:0019219,GO:0019222,GO:0031323,GO:0031324,GO:0031326,GO:…	-	ko:K11251	ko04217,ko05034,ko05322,map04217,map05034,map05322	-	-	-	ko00000,ko00001,ko03036,ko04147	-	-	Histone,Histone_H2A_C
Ssa01000163.t1	3847.GLYMA10G29311.1	1.78e-31	114	2CZB8@1|root,2S4QZ@2759|Eukaryota,37VYK@33090|Viridiplantae,3GKMZ@35493|Streptophyta,4JUNK@91835|fabids	35493|Streptophyta	-	-	-	-	-	-	-	-	-	-	-	-	-	-
Ssa01000163.t2	3847.GLYMA10G29311.1	2.17e-45	150	2CZB8@1|root,2S4QZ@2759|Eukaryota,37VYK@33090|Viridiplantae,3GKMZ@35493|Streptophyta,4JUNK@91835|fabids	35493|Streptophyta	-	-	-	-	-	-	-	-	-	-	-	-	-	-
Ssa01000164.t1	4432.XP_010259649.1	0	1149	COG0443@1|root,KOG0100@2759|Eukaryota,37SRR@33090|Viridiplantae,3GFK3@35493|Streptophyta	35493|Streptophyta	O	Belongs to the heat shock protein 70 family	-	GO:0000003,GO:0000902,GO:0000904,GO:0003006,GO:0005575,GO:0005622,GO:0005623,GO:0005634,GO:0005654,GO:0008150,GO:0009653,GO:0009826,GO:0009856,GO:0009860,GO:0009932,GO:0009987,GO:0016043,GO:0016049,GO:0016592,GO:0022414,GO:0030154,GO:0031974,GO:0031981,GO:0032501,GO:0032502,GO:0032989,GO:0032991,GO:0040007,GO:0043226,GO:0043227,GO:0043229,GO:0043231,GO:0043233,GO:0044422,GO:0044424,GO:0044428,GO:…	-	ko:K09490	ko03060,ko04141,ko04918,ko05020,map03060,map04141,map04918,map05020	-	-	-	ko00000,ko00001,ko03110,ko04131,ko04147	1.A.33	-	HSP70
Ssa01000165.t1	3847.GLYMA03G39610.1	0	1550	KOG0039@1|root,KOG0039@2759|Eukaryota,37KYK@33090|Viridiplantae,3G87H@35493|Streptophyta,4JNMK@91835|fabids	35493|Streptophyta	PQ	Respiratory burst	RBOHB	GO:0003674,GO:0003824,GO:0005488,GO:0005509,GO:0005515,GO:0005575,GO:0005623,GO:0005886,GO:0006950,GO:0007275,GO:0008150,GO:0008152,GO:0009266,GO:0009408,GO:0009628,GO:0009791,GO:0009845,GO:0016020,GO:0016174,GO:0016491,GO:0016651,GO:0032501,GO:0032502,GO:0043167,GO:0043169,GO:0043621,GO:0044464,GO:0046872,GO:0048856,GO:0050664,GO:0050896,GO:0055114,GO:0071944,GO:0090351	-	ko:K13447	ko04016,ko04626,map04016,map04626	-	-	-	ko00000,ko00001,ko01000	-	-	EF-hand_6,FAD_binding_8,Ferric_reduct,NADPH_Ox,NAD_binding_6
Ssa01000166.t1	3885.XP_007144947.1	1.4e-78	254	KOG1603@1|root,KOG1603@2759|Eukaryota,37M8C@33090|Viridiplantae,3GH8E@35493|Streptophyta,4JPPS@91835|fabids	35493|Streptophyta	P	Heavy-metal-associated domain	-	GO:0003674,GO:0005488,GO:0005575,GO:0005622,GO:0005623,GO:0005737,GO:0006810,GO:0006811,GO:0006812,GO:0006873,GO:0006875,GO:0008150,GO:0009987,GO:0019725,GO:0030001,GO:0030003,GO:0042592,GO:0043167,GO:0043169,GO:0044424,GO:0044464,GO:0046872,GO:0046914,GO:0046916,GO:0048878,GO:0050801,GO:0051179,GO:0051234,GO:0055065,GO:0055076,GO:0055080,GO:0055082,GO:0065007,GO:0065008,GO:0098771	-	-	-	-	-	-	-	-	-	HMA
Ssa01000167.t1	29730.Gorai.007G299900.1	1.27e-50	166	2BQ63@1|root,2S1TF@2759|Eukaryota,37WA4@33090|Viridiplantae,3GK5X@35493|Streptophyta	35493|Streptophyta	S	rapid alkalinization	-	-	-	-	-	-	-	-	-	-	-	RALF
Ssa01000168.t1	71139.XP_010043058.1	6.2e-89	270	2C8GV@1|root,2QUI7@2759|Eukaryota,37JRV@33090|Viridiplantae,3G77S@35493|Streptophyta	35493|Streptophyta	S	REF SRPP-like protein	-	-	-	-	-	-	-	-	-	-	-	REF
Ssa01000169.t1	981085.XP_010105658.1	1.99e-181	511	COG0740@1|root,KOG0840@2759|Eukaryota,37JQ6@33090|Viridiplantae,3GB0G@35493|Streptophyta,4JD1P@91835|fabids	35493|Streptophyta	O	ATP-dependent Clp protease proteolytic	-	-	-	-	-	-	-	-	-	-	-	CLP_protease
Ssa01000170.t1	3847.GLYMA03G39540.1	3.18e-248	691	KOG2847@1|root,KOG2847@2759|Eukaryota,37I0T@33090|Viridiplantae,3GCGM@35493|Streptophyta,4JDGW@91835|fabids	35493|Streptophyta	I	cardiolipin acyl-chain remodeling	-	GO:0003674,GO:0003824,GO:0005575,GO:0005622,GO:0005623,GO:0005737,GO:0005739,GO:0005740,GO:0006629,GO:0006644,GO:0006650,GO:0006793,GO:0006796,GO:0006996,GO:0007005,GO:0007006,GO:0007007,GO:0007275,GO:0007507,GO:0008150,GO:0008152,GO:0008374,GO:0009987,GO:0016020,GO:0016043,GO:0016740,GO:0016746,GO:0016747,GO:0019637,GO:0031090,GO:0031224,GO:0031966,GO:0031967,GO:0031975,GO:0032048,GO:0032501,GO:…	-	ko:K13511	ko00564,map00564	-	R09037	RC00004,RC00037	ko00000,ko00001,ko01000,ko01004	-	-	Acyltransferase
Ssa01000171.t2	3847.GLYMA19G42150.1	1.83e-167	475	KOG0836@1|root,KOG0836@2759|Eukaryota,37K2U@33090|Viridiplantae,3GA1B@35493|Streptophyta,4JDTA@91835|fabids	35493|Streptophyta	Z	F-actin-capping proteins bind in a Ca(2 )-independent manner to the fast growing ends of actin filaments (barbed end) thereby blocking the exchange of subunits at these ends. Unlike other capping proteins (such as gelsolin and severin), these proteins do not sever actin filaments	-	-	-	ko:K10364,ko:K14842	ko04144,map04144	-	-	-	ko00000,ko00001,ko03009,ko04131,ko04147,ko04812	-	-	F-actin_cap_A
Ssa01000171.t1	3847.GLYMA19G42150.1	5.75e-196	546	KOG0836@1|root,KOG0836@2759|Eukaryota,37K2U@33090|Viridiplantae,3GA1B@35493|Streptophyta,4JDTA@91835|fabids	35493|Streptophyta	Z	F-actin-capping proteins bind in a Ca(2 )-independent manner to the fast growing ends of actin filaments (barbed end) thereby blocking the exchange of subunits at these ends. Unlike other capping proteins (such as gelsolin and severin), these proteins do not sever actin filaments	-	-	-	ko:K10364,ko:K14842	ko04144,map04144	-	-	-	ko00000,ko00001,ko03009,ko04131,ko04147,ko04812	-	-	F-actin_cap_A
Ssa01000172.t2	3656.XP_008454050.1	1.55e-275	757	COG1222@1|root,KOG0652@2759|Eukaryota,37IG0@33090|Viridiplantae,3GD26@35493|Streptophyta,4JECC@91835|fabids	35493|Streptophyta	O	Belongs to the AAA ATPase family	RPT5B	GO:0000502,GO:0001678,GO:0003674,GO:0003824,GO:0005488,GO:0005515,GO:0005575,GO:0005622,GO:0005623,GO:0005634,GO:0005737,GO:0005829,GO:0005838,GO:0005886,GO:0006355,GO:0006357,GO:0006508,GO:0006511,GO:0006807,GO:0006950,GO:0007154,GO:0007165,GO:0007275,GO:0008134,GO:0008150,GO:0008152,GO:0008540,GO:0009056,GO:0009057,GO:0009553,GO:0009555,GO:0009743,GO:0009746,GO:0009749,GO:0009756,GO:0009757,GO:…	-	ko:K03065	ko03050,ko05169,map03050,map05169	M00341	-	-	ko00000,ko00001,ko00002,ko03051	-	-	AAA
Ssa01000172.t1	3656.XP_008454050.1	6.33e-264	728	COG1222@1|root,KOG0652@2759|Eukaryota,37IG0@33090|Viridiplantae,3GD26@35493|Streptophyta,4JECC@91835|fabids	35493|Streptophyta	O	Belongs to the AAA ATPase family	RPT5B	GO:0000502,GO:0001678,GO:0003674,GO:0003824,GO:0005488,GO:0005515,GO:0005575,GO:0005622,GO:0005623,GO:0005634,GO:0005737,GO:0005829,GO:0005838,GO:0005886,GO:0006355,GO:0006357,GO:0006508,GO:0006511,GO:0006807,GO:0006950,GO:0007154,GO:0007165,GO:0007275,GO:0008134,GO:0008150,GO:0008152,GO:0008540,GO:0009056,GO:0009057,GO:0009553,GO:0009555,GO:0009743,GO:0009746,GO:0009749,GO:0009756,GO:0009757,GO:…	-	ko:K03065	ko03050,ko05169,map03050,map05169	M00341	-	-	ko00000,ko00001,ko00002,ko03051	-	-	AAA
Ssa01000173.t1	3847.GLYMA10G29230.1	5.44e-258	713	28NB6@1|root,2QUWQ@2759|Eukaryota,37SD2@33090|Viridiplantae,3GBG1@35493|Streptophyta,4JIM1@91835|fabids	35493|Streptophyta	O	RING-like zinc finger	-	-	-	-	-	-	-	-	-	-	-	zf-RING_11,zf-RING_2
Ssa01000174.t1	3880.AES82436	9.37e-101	301	COG0724@1|root,KOG0105@2759|Eukaryota,37SWF@33090|Viridiplantae,3GFAA@35493|Streptophyta,4JCZM@91835|fabids	35493|Streptophyta	A	Pre-mRNA-splicing factor	-	-	-	ko:K12890	ko03040,ko04657,ko05168,map03040,map04657,map05168	-	-	-	ko00000,ko00001,ko03041	-	-	RRM_1
Ssa01000174.t2	3880.AES82436	1.14e-104	311	COG0724@1|root,KOG0105@2759|Eukaryota,37SWF@33090|Viridiplantae,3GFAA@35493|Streptophyta,4JCZM@91835|fabids	35493|Streptophyta	A	Pre-mRNA-splicing factor	-	-	-	ko:K12890	ko03040,ko04657,ko05168,map03040,map04657,map05168	-	-	-	ko00000,ko00001,ko03041	-	-	RRM_1
Ssa01000174.t3	3880.AES82436	2.09e-102	305	COG0724@1|root,KOG0105@2759|Eukaryota,37SWF@33090|Viridiplantae,3GFAA@35493|Streptophyta,4JCZM@91835|fabids	35493|Streptophyta	A	Pre-mRNA-splicing factor	-	-	-	ko:K12890	ko03040,ko04657,ko05168,map03040,map04657,map05168	-	-	-	ko00000,ko00001,ko03041	-	-	RRM_1
Ssa01000175.t1	3656.XP_008450622.1	3.35e-55	173	2CR4R@1|root,2S46H@2759|Eukaryota,37WG3@33090|Viridiplantae,3GK1E@35493|Streptophyta,4JQNT@91835|fabids	35493|Streptophyta	S	Hypoxia induced protein conserved region	-	-	-	-	-	-	-	-	-	-	-	HIG_1_N
Ssa01000176.t1	3656.XP_008450627.1	9.16e-74	222	KOG3434@1|root,KOG3434@2759|Eukaryota,37UKJ@33090|Viridiplantae,3GIM0@35493|Streptophyta,4JPTR@91835|fabids	35493|Streptophyta	J	60S ribosomal protein	-	GO:0002181,GO:0003674,GO:0003676,GO:0003723,GO:0003729,GO:0003735,GO:0005198,GO:0005488,GO:0005575,GO:0005622,GO:0005623,GO:0005634,GO:0005730,GO:0005737,GO:0005829,GO:0005840,GO:0005844,GO:0005886,GO:0005911,GO:0006412,GO:0006518,GO:0006807,GO:0008150,GO:0008152,GO:0009058,GO:0009059,GO:0009506,GO:0009987,GO:0010467,GO:0015934,GO:0016020,GO:0019538,GO:0022625,GO:0022626,GO:0030054,GO:0031974,GO:…	-	ko:K02891	ko03010,map03010	M00177	-	-	br01610,ko00000,ko00001,ko00002,ko03011	-	-	Ribosomal_L22e
Ssa01000177.t1	29730.Gorai.007G300900.1	1.62e-65	201	2DWX9@1|root,2S6R7@2759|Eukaryota,37VJP@33090|Viridiplantae,3GJKH@35493|Streptophyta	35493|Streptophyta	S	dormancy auxin associated family protein	-	-	-	-	-	-	-	-	-	-	-	Auxin_repressed
Ssa01000178.t1	3847.GLYMA10G29180.1	2.98e-165	468	28M7X@1|root,2QTR3@2759|Eukaryota,37SJT@33090|Viridiplantae,3G7NE@35493|Streptophyta,4JFH9@91835|fabids	35493|Streptophyta	S	Folate receptor family	-	-	-	-	-	-	-	-	-	-	-	Folate_rec
Ssa01000179.t1	3885.XP_007136470.1	3.13e-122	349	COG2016@1|root,KOG2523@2759|Eukaryota,37HPR@33090|Viridiplantae,3GAH4@35493|Streptophyta	35493|Streptophyta	J	Malignant T-cell-amplified sequence 1 homolog	-	GO:0001731,GO:0002181,GO:0002183,GO:0002188,GO:0005575,GO:0005622,GO:0005623,GO:0005737,GO:0005829,GO:0005886,GO:0006412,GO:0006413,GO:0006518,GO:0006807,GO:0006996,GO:0008150,GO:0008152,GO:0008284,GO:0009058,GO:0009059,GO:0009987,GO:0010467,GO:0016020,GO:0016032,GO:0016043,GO:0019080,GO:0019081,GO:0019538,GO:0022411,GO:0022607,GO:0022613,GO:0022618,GO:0032790,GO:0032984,GO:0032988,GO:0034622,GO:…	-	ko:K02883,ko:K07575	ko03010,map03010	M00177,M00179	-	-	br01610,ko00000,ko00001,ko00002,ko03011	-	-	PUA
Ssa01000180.t1	3847.GLYMA20G38130.1	4.94e-122	349	COG1727@1|root,KOG1714@2759|Eukaryota,37SDX@33090|Viridiplantae,3GBUI@35493|Streptophyta,4JDPF@91835|fabids	35493|Streptophyta	J	60S ribosomal protein	-	GO:0003674,GO:0003676,GO:0003723,GO:0003729,GO:0003735,GO:0005198,GO:0005488,GO:0005575,GO:0005622,GO:0005623,GO:0005737,GO:0005773,GO:0005774,GO:0005829,GO:0005840,GO:0005886,GO:0005911,GO:0006412,GO:0006518,GO:0006807,GO:0008150,GO:0008152,GO:0009058,GO:0009059,GO:0009506,GO:0009507,GO:0009536,GO:0009987,GO:0010467,GO:0015934,GO:0016020,GO:0019538,GO:0022625,GO:0022626,GO:0030054,GO:0031090,GO:…	-	ko:K02883	ko03010,map03010	M00177,M00179	-	-	br01610,ko00000,ko00001,ko00002,ko03011	-	-	Ribosomal_L18
Ssa01000181.t1	3847.GLYMA19G41990.1	8.37e-194	541	COG0596@1|root,KOG4178@2759|Eukaryota,37P84@33090|Viridiplantae,3G9C1@35493|Streptophyta,4JMFK@91835|fabids	35493|Streptophyta	I	epoxide hydrolase	-	GO:0000287,GO:0001676,GO:0003008,GO:0003013,GO:0003018,GO:0003674,GO:0003824,GO:0004301,GO:0005102,GO:0005488,GO:0005515,GO:0005575,GO:0005622,GO:0005623,GO:0005737,GO:0005777,GO:0005782,GO:0005829,GO:0006082,GO:0006605,GO:0006625,GO:0006629,GO:0006631,GO:0006633,GO:0006690,GO:0006725,GO:0006793,GO:0006796,GO:0006805,GO:0006810,GO:0006873,GO:0006874,GO:0006875,GO:0006886,GO:0006950,GO:0006952,GO:…	3.1.3.76,3.3.2.10	ko:K08726	ko00590,ko00625,ko01100,ko01120,ko04146,map00590,map00625,map01100,map01120,map04146	-	R05842,R07108,R07109,R07110,R07111	RC01477,RC01757	ko00000,ko00001,ko01000,ko01002,ko01009	-	-	Abhydrolase_1,Abhydrolase_6
Ssa01000182.t1	3847.GLYMA20G38140.1	2.62e-188	528	COG0596@1|root,KOG4178@2759|Eukaryota,37P84@33090|Viridiplantae,3G9C1@35493|Streptophyta,4JMFK@91835|fabids	35493|Streptophyta	I	epoxide hydrolase	-	GO:0000287,GO:0001676,GO:0003008,GO:0003013,GO:0003018,GO:0003674,GO:0003824,GO:0004301,GO:0005102,GO:0005488,GO:0005515,GO:0005575,GO:0005622,GO:0005623,GO:0005737,GO:0005777,GO:0005782,GO:0005829,GO:0006082,GO:0006605,GO:0006625,GO:0006629,GO:0006631,GO:0006633,GO:0006690,GO:0006725,GO:0006793,GO:0006796,GO:0006805,GO:0006810,GO:0006873,GO:0006874,GO:0006875,GO:0006886,GO:0006950,GO:0006952,GO:…	3.1.3.76,3.3.2.10	ko:K08726	ko00590,ko00625,ko01100,ko01120,ko04146,map00590,map00625,map01100,map01120,map04146	-	R05842,R07108,R07109,R07110,R07111	RC01477,RC01757	ko00000,ko00001,ko01000,ko01002,ko01009	-	-	Abhydrolase_1,Abhydrolase_6
Ssa01000183.t1	3885.XP_007144960.1	3.99e-168	477	COG0596@1|root,KOG4178@2759|Eukaryota,37P84@33090|Viridiplantae,3G9C1@35493|Streptophyta,4JMFK@91835|fabids	35493|Streptophyta	I	epoxide hydrolase	-	GO:0000287,GO:0001676,GO:0003008,GO:0003013,GO:0003018,GO:0003674,GO:0003824,GO:0004301,GO:0005102,GO:0005488,GO:0005515,GO:0005575,GO:0005622,GO:0005623,GO:0005737,GO:0005777,GO:0005782,GO:0005829,GO:0006082,GO:0006605,GO:0006625,GO:0006629,GO:0006631,GO:0006633,GO:0006690,GO:0006725,GO:0006793,GO:0006796,GO:0006805,GO:0006810,GO:0006873,GO:0006874,GO:0006875,GO:0006886,GO:0006950,GO:0006952,GO:…	3.1.3.76,3.3.2.10	ko:K08726	ko00590,ko00625,ko01100,ko01120,ko04146,map00590,map00625,map01100,map01120,map04146	-	R05842,R07108,R07109,R07110,R07111	RC01477,RC01757	ko00000,ko00001,ko01000,ko01002,ko01009	-	-	Abhydrolase_1,Abhydrolase_6
Ssa01000184.t1	3847.GLYMA19G41980.1	3.16e-29	113	2AHYF@1|root,2RZ3G@2759|Eukaryota,37UV1@33090|Viridiplantae,3GJ7D@35493|Streptophyta,4JPVY@91835|fabids	35493|Streptophyta	-	-	-	-	-	-	-	-	-	-	-	-	-	-
Ssa01000185.t1	3880.AES61419	7.73e-254	715	COG4677@1|root,2QPZF@2759|Eukaryota,37P8C@33090|Viridiplantae,3G9BM@35493|Streptophyta,4JMXN@91835|fabids	35493|Streptophyta	G	Acts in the modification of cell walls via demethylesterification of cell wall pectin	-	GO:0003674,GO:0003824,GO:0004857,GO:0005575,GO:0005623,GO:0008150,GO:0016787,GO:0016788,GO:0030234,GO:0030599,GO:0043086,GO:0044092,GO:0044464,GO:0046910,GO:0050790,GO:0052689,GO:0065007,GO:0065009,GO:0071944,GO:0098772	3.1.1.11	ko:K01051	ko00040,ko01100,map00040,map01100	M00081	R02362	RC00460,RC00461	ko00000,ko00001,ko00002,ko01000	-	-	PMEI,Pectinesterase
Ssa01000186.t1	3847.GLYMA19G41930.1	1.5e-205	596	KOG1947@1|root,KOG1947@2759|Eukaryota,37HMS@33090|Viridiplantae,3GG3W@35493|Streptophyta,4JDNF@91835|fabids	35493|Streptophyta	S	Leucine Rich repeat	-	-	-	ko:K10268	-	-	-	-	ko00000,ko04121	-	-	LRR_6
Ssa01000186.t2	3847.GLYMA19G41930.1	3.57e-202	588	KOG1947@1|root,KOG1947@2759|Eukaryota,37HMS@33090|Viridiplantae,3GG3W@35493|Streptophyta,4JDNF@91835|fabids	35493|Streptophyta	S	Leucine Rich repeat	-	-	-	ko:K10268	-	-	-	-	ko00000,ko04121	-	-	LRR_6
Ssa01000187.t1	3847.GLYMA20G38180.1	0	1121	2C2Y7@1|root,2QQ1A@2759|Eukaryota,37RSQ@33090|Viridiplantae,3GANN@35493|Streptophyta,4JD6R@91835|fabids	35493|Streptophyta	S	Glycine-rich domain-containing protein-like	-	-	-	-	-	-	-	-	-	-	-	GRDP-like
Ssa01000187.t2	3847.GLYMA20G38180.1	0	1125	2C2Y7@1|root,2QQ1A@2759|Eukaryota,37RSQ@33090|Viridiplantae,3GANN@35493|Streptophyta,4JD6R@91835|fabids	35493|Streptophyta	S	Glycine-rich domain-containing protein-like	-	-	-	-	-	-	-	-	-	-	-	GRDP-like
Ssa01000188.t1	3760.EMJ09794	1.13e-111	330	28IYG@1|root,2QRA4@2759|Eukaryota,37JF5@33090|Viridiplantae,3GCTM@35493|Streptophyta,4JI5P@91835|fabids	35493|Streptophyta	S	f-box protein	-	GO:0003674,GO:0005488,GO:0030246	-	-	-	-	-	-	-	-	-	F-box,PP2
Ssa01000188.t2	3760.EMJ09794	7.82e-110	325	28IYG@1|root,2QRA4@2759|Eukaryota,37JF5@33090|Viridiplantae,3GCTM@35493|Streptophyta,4JI5P@91835|fabids	35493|Streptophyta	S	f-box protein	-	GO:0003674,GO:0005488,GO:0030246	-	-	-	-	-	-	-	-	-	F-box,PP2
Ssa01000189.t1	3847.GLYMA19G41900.1	1.97e-110	327	28IYG@1|root,2QRA4@2759|Eukaryota,37JF5@33090|Viridiplantae,3G8RG@35493|Streptophyta,4JER8@91835|fabids	35493|Streptophyta	S	f-box protein	-	GO:0003674,GO:0005488,GO:0005575,GO:0005622,GO:0005623,GO:0005634,GO:0005737,GO:0030246,GO:0043226,GO:0043227,GO:0043229,GO:0043231,GO:0044424,GO:0044464	-	-	-	-	-	-	-	-	-	F-box,PP2
Ssa01000189.t2	3847.GLYMA19G41900.1	2.85e-109	327	28IYG@1|root,2QRA4@2759|Eukaryota,37JF5@33090|Viridiplantae,3G8RG@35493|Streptophyta,4JER8@91835|fabids	35493|Streptophyta	S	f-box protein	-	GO:0003674,GO:0005488,GO:0005575,GO:0005622,GO:0005623,GO:0005634,GO:0005737,GO:0030246,GO:0043226,GO:0043227,GO:0043229,GO:0043231,GO:0044424,GO:0044464	-	-	-	-	-	-	-	-	-	F-box,PP2
Ssa01000190.t1	3847.GLYMA03G39330.1	1.06e-100	303	28IYG@1|root,2QRA4@2759|Eukaryota,37JF5@33090|Viridiplantae,3G8RG@35493|Streptophyta,4JER8@91835|fabids	35493|Streptophyta	S	f-box protein	-	GO:0003674,GO:0005488,GO:0005575,GO:0005622,GO:0005623,GO:0005634,GO:0005737,GO:0030246,GO:0043226,GO:0043227,GO:0043229,GO:0043231,GO:0044424,GO:0044464	-	-	-	-	-	-	-	-	-	F-box,PP2
Ssa01000191.t1	3750.XP_008370412.1	3.11e-136	392	28IPX@1|root,2QR10@2759|Eukaryota,37K9U@33090|Viridiplantae,3G9QV@35493|Streptophyta,4JI4E@91835|fabids	35493|Streptophyta	-	-	-	-	-	-	-	-	-	-	-	-	-	-
Ssa01000192.t1	3847.GLYMA20G38200.1	0	1679	COG1502@1|root,KOG1329@2759|Eukaryota,37Q6B@33090|Viridiplantae,3G8U6@35493|Streptophyta,4JKP8@91835|fabids	35493|Streptophyta	I	phospholipase D	-	GO:0003674,GO:0003824,GO:0004620,GO:0004630,GO:0005575,GO:0005622,GO:0005623,GO:0005737,GO:0005773,GO:0006629,GO:0006643,GO:0006644,GO:0006664,GO:0006793,GO:0006796,GO:0006950,GO:0006995,GO:0007154,GO:0007275,GO:0008081,GO:0008150,GO:0008152,GO:0008610,GO:0009056,GO:0009058,GO:0009247,GO:0009267,GO:0009395,GO:0009605,GO:0009719,GO:0009725,GO:0009733,GO:0009987,GO:0009991,GO:0010033,GO:0016036,GO:…	3.1.4.4	ko:K01115	ko00564,ko00565,ko01100,ko01110,ko04014,ko04024,ko04071,ko04072,ko04144,ko04666,ko04724,ko04912,ko05231,map00564,map00565,map01100,map01110,map04014,map04024,map04071,map04072,map04144,map04666,map04724,map04912,map05231	-	R01310,R02051,R07385	RC00017,RC00425	ko00000,ko00001,ko01000,ko04131	-	-	PH,PLDc,PLDc_2
Ssa01000193.t1	3760.EMJ06575	1.73e-215	600	COG0631@1|root,KOG0698@2759|Eukaryota,37JRM@33090|Viridiplantae,3GEH8@35493|Streptophyta,4JECP@91835|fabids	35493|Streptophyta	T	phosphatase 2C	-	GO:0000226,GO:0001101,GO:0005575,GO:0005623,GO:0005886,GO:0006464,GO:0006470,GO:0006793,GO:0006796,GO:0006807,GO:0006950,GO:0006996,GO:0007010,GO:0007017,GO:0008150,GO:0008152,GO:0009414,GO:0009415,GO:0009628,GO:0009819,GO:0009987,GO:0010035,GO:0016020,GO:0016043,GO:0016311,GO:0019538,GO:0036211,GO:0040008,GO:0042221,GO:0043170,GO:0043393,GO:0043412,GO:0044237,GO:0044238,GO:0044260,GO:0044267,GO:…	-	-	-	-	-	-	-	-	-	PP2C
Ssa01000194.t1	3847.GLYMA20G38230.1	0	2016	KOG0266@1|root,KOG0266@2759|Eukaryota,37JE1@33090|Viridiplantae,3GDCN@35493|Streptophyta,4JEZ9@91835|fabids	35493|Streptophyta	KLT	Topless-related protein	-	-	-	-	-	-	-	-	-	-	-	F-box,WD40
Ssa01000195.t1	3847.GLYMA20G38250.1	6.91e-144	420	KOG2889@1|root,KOG2889@2759|Eukaryota,37MJN@33090|Viridiplantae,3GESM@35493|Streptophyta,4JFC2@91835|fabids	35493|Streptophyta	S	Pre-mRNA-splicing factor	-	GO:0005575,GO:0005622,GO:0005623,GO:0005634,GO:0005681,GO:0032991,GO:0043226,GO:0043227,GO:0043229,GO:0043231,GO:0044422,GO:0044424,GO:0044428,GO:0044446,GO:0044464,GO:0071011,GO:1990904	-	ko:K12849	ko03040,map03040	-	-	-	ko00000,ko00001,ko03041	-	-	PRP38,PRP38_assoc
Ssa01000196.t1	28532.XP_010548772.1	8.68e-11	67.4	2C8M2@1|root,2R7KX@2759|Eukaryota,387YC@33090|Viridiplantae,3GW16@35493|Streptophyta,3HV9G@3699|Brassicales	35493|Streptophyta	-	-	-	-	-	-	-	-	-	-	-	-	-	-
Ssa01000197.t1	3847.GLYMA19G41810.1	6.95e-284	778	COG0631@1|root,KOG0698@2759|Eukaryota,37QEH@33090|Viridiplantae,3GB4I@35493|Streptophyta,4JF0G@91835|fabids	35493|Streptophyta	T	phosphatase 2C	-	GO:0005575,GO:0005623,GO:0005886,GO:0016020,GO:0044464,GO:0071944	-	-	-	-	-	-	-	-	-	PP2C
Ssa01000197.t2	3847.GLYMA19G41810.1	2.6e-245	679	COG0631@1|root,KOG0698@2759|Eukaryota,37QEH@33090|Viridiplantae,3GB4I@35493|Streptophyta,4JF0G@91835|fabids	35493|Streptophyta	T	phosphatase 2C	-	GO:0005575,GO:0005623,GO:0005886,GO:0016020,GO:0044464,GO:0071944	-	-	-	-	-	-	-	-	-	PP2C
Ssa01000198.t1	3847.GLYMA19G41800.2	0	1182	COG5059@1|root,KOG0239@2759|Eukaryota,37KAM@33090|Viridiplantae,3G8QJ@35493|Streptophyta,4JRAU@91835|fabids	35493|Streptophyta	Z	Belongs to the TRAFAC class myosin-kinesin ATPase superfamily. Kinesin family	-	GO:0003674,GO:0003774,GO:0003777,GO:0003779,GO:0003824,GO:0005488,GO:0005515,GO:0005575,GO:0005622,GO:0005623,GO:0005856,GO:0005871,GO:0005875,GO:0006810,GO:0006928,GO:0007017,GO:0007018,GO:0007097,GO:0008017,GO:0008092,GO:0008150,GO:0008569,GO:0009987,GO:0015629,GO:0015630,GO:0015631,GO:0016462,GO:0016787,GO:0016817,GO:0016818,GO:0016887,GO:0017111,GO:0031534,GO:0032991,GO:0042623,GO:0043226,GO:…	-	ko:K10406	-	-	-	-	ko00000,ko04812	-	-	CH,Kinesin,Microtub_bd
Ssa01000199.t1	3827.XP_004494555.1	8e-301	856	KOG4430@1|root,KOG4430@2759|Eukaryota,37PEN@33090|Viridiplantae,3GBFG@35493|Streptophyta,4JENH@91835|fabids	35493|Streptophyta	K	PHD and RING finger domain-containing protein	-	GO:0000228,GO:0000785,GO:0000790,GO:0003674,GO:0005488,GO:0005515,GO:0005575,GO:0005622,GO:0005623,GO:0005634,GO:0005694,GO:0006139,GO:0006259,GO:0006260,GO:0006261,GO:0006325,GO:0006338,GO:0006351,GO:0006355,GO:0006357,GO:0006366,GO:0006396,GO:0006397,GO:0006725,GO:0006807,GO:0006996,GO:0008150,GO:0008152,GO:0008623,GO:0009058,GO:0009059,GO:0009889,GO:0009987,GO:0010467,GO:0010468,GO:0010556,GO:…	-	-	-	-	-	-	-	-	-	PHD,zf-RING_2
Ssa01000200.t1	3827.XP_004494549.1	1.03e-40	139	COG5641@1|root,KOG1601@2759|Eukaryota,37VZI@33090|Viridiplantae,3GKIZ@35493|Streptophyta	35493|Streptophyta	K	GATA transcription factor	-	GO:0000976,GO:0000977,GO:0000981,GO:0001012,GO:0001067,GO:0001085,GO:0001228,GO:0003674,GO:0003676,GO:0003677,GO:0003682,GO:0003690,GO:0003700,GO:0005488,GO:0005515,GO:0005575,GO:0005622,GO:0005623,GO:0005634,GO:0005667,GO:0006139,GO:0006351,GO:0006355,GO:0006357,GO:0006366,GO:0006725,GO:0006807,GO:0008134,GO:0008150,GO:0008152,GO:0009058,GO:0009059,GO:0009889,GO:0009891,GO:0009893,GO:0009987,GO:…	-	-	-	-	-	-	-	-	-	GATA
Ssa01000201.t1	3760.EMJ09213	1.43e-50	187	28PRM@1|root,2QWE3@2759|Eukaryota,37HVY@33090|Viridiplantae,3GB55@35493|Streptophyta,4JN4B@91835|fabids	35493|Streptophyta	S	Calmodulin-binding protein	-	GO:0001666,GO:0002229,GO:0002237,GO:0002239,GO:0002376,GO:0002682,GO:0002831,GO:0003674,GO:0003676,GO:0003677,GO:0003700,GO:0005488,GO:0005515,GO:0005516,GO:0005575,GO:0005622,GO:0005623,GO:0005634,GO:0006082,GO:0006355,GO:0006725,GO:0006950,GO:0006952,GO:0006955,GO:0008150,GO:0008152,GO:0009058,GO:0009314,GO:0009411,GO:0009416,GO:0009605,GO:0009607,GO:0009617,GO:0009620,GO:0009628,GO:0009696,GO:…	-	-	-	-	-	-	-	-	-	Calmodulin_bind
Ssa01000202.t2	3847.GLYMA19G41730.1	3.09e-161	478	28PRM@1|root,2QWE3@2759|Eukaryota,37HVY@33090|Viridiplantae,3GB55@35493|Streptophyta,4JN4B@91835|fabids	35493|Streptophyta	S	Calmodulin-binding protein	-	-	-	-	-	-	-	-	-	-	-	Calmodulin_bind
Ssa01000202.t1	3847.GLYMA19G41730.1	5.42e-169	498	28PRM@1|root,2QWE3@2759|Eukaryota,37HVY@33090|Viridiplantae,3GB55@35493|Streptophyta,4JN4B@91835|fabids	35493|Streptophyta	S	Calmodulin-binding protein	-	-	-	-	-	-	-	-	-	-	-	Calmodulin_bind
Ssa01000203.t1	3847.GLYMA20G38330.3	2.55e-312	862	KOG2207@1|root,KOG2207@2759|Eukaryota,37M0A@33090|Viridiplantae,3GE2W@35493|Streptophyta,4JER6@91835|fabids	35493|Streptophyta	L	3'-5' exonuclease	-	-	-	-	-	-	-	-	-	-	-	DNA_pol_A_exo1
Ssa01000205.t2	3847.GLYMA20G38350.1	4.88e-157	453	28NIN@1|root,2QV49@2759|Eukaryota,37M4P@33090|Viridiplantae,3GDQ6@35493|Streptophyta,4JG5V@91835|fabids	35493|Streptophyta	S	Protein of unknown function (DUF1645)	-	-	-	-	-	-	-	-	-	-	-	DUF1645
Ssa01000205.t1	3847.GLYMA20G38350.1	5.06e-157	453	28NIN@1|root,2QV49@2759|Eukaryota,37M4P@33090|Viridiplantae,3GDQ6@35493|Streptophyta,4JG5V@91835|fabids	35493|Streptophyta	S	Protein of unknown function (DUF1645)	-	-	-	-	-	-	-	-	-	-	-	DUF1645
Ssa01000206.t1	4432.XP_010268045.1	6.16e-213	593	COG0526@1|root,KOG0191@2759|Eukaryota,37NZK@33090|Viridiplantae,3GGAI@35493|Streptophyta	35493|Streptophyta	O	Belongs to the protein disulfide isomerase family	-	GO:0003674,GO:0003756,GO:0003824,GO:0005575,GO:0005622,GO:0005623,GO:0005737,GO:0005783,GO:0006457,GO:0006950,GO:0008150,GO:0009987,GO:0012505,GO:0016853,GO:0016860,GO:0016864,GO:0033554,GO:0034976,GO:0043226,GO:0043227,GO:0043229,GO:0043231,GO:0044424,GO:0044444,GO:0044464,GO:0050896,GO:0051716,GO:0140096	5.3.4.1	ko:K09584	ko04141,map04141	-	-	-	ko00000,ko00001,ko01000,ko03110,ko04131	-	-	ERp29,Thioredoxin
Ssa01000207.t1	57918.XP_004300458.1	4.23e-135	382	KOG0077@1|root,KOG0077@2759|Eukaryota,37MJP@33090|Viridiplantae,3G7NN@35493|Streptophyta,4JJJ5@91835|fabids	35493|Streptophyta	U	Belongs to the small GTPase superfamily. SAR1 family	-	GO:0000166,GO:0001882,GO:0001883,GO:0003674,GO:0005488,GO:0005525,GO:0005575,GO:0005623,GO:0005886,GO:0016020,GO:0017076,GO:0019001,GO:0032549,GO:0032550,GO:0032553,GO:0032555,GO:0032561,GO:0035639,GO:0036094,GO:0043167,GO:0043168,GO:0044464,GO:0071944,GO:0097159,GO:0097367,GO:1901265,GO:1901363	-	ko:K07953	ko04141,ko05134,map04141,map05134	M00404	-	-	ko00000,ko00001,ko00002,ko01000,ko04031,ko04131	-	-	Arf
Ssa01000208.t1	3885.XP_007163284.1	0	1006	KOG4197@1|root,KOG4197@2759|Eukaryota,37M7A@33090|Viridiplantae,3G9KY@35493|Streptophyta,4JHD4@91835|fabids	35493|Streptophyta	S	Pentatricopeptide repeat-containing protein	-	-	-	-	-	-	-	-	-	-	-	DYW_deaminase,PPR,PPR_2
Ssa01000209.t1	3885.XP_007144994.1	3.53e-55	177	COG0589@1|root,2RYTA@2759|Eukaryota,37UMZ@33090|Viridiplantae,3GIN4@35493|Streptophyta,4JPGI@91835|fabids	35493|Streptophyta	T	Universal stress protein A-like protein	-	GO:0000166,GO:0003674,GO:0005488,GO:0005575,GO:0005623,GO:0005886,GO:0008144,GO:0016020,GO:0016208,GO:0017076,GO:0030554,GO:0032553,GO:0032555,GO:0032559,GO:0036094,GO:0043167,GO:0043168,GO:0043169,GO:0044464,GO:0071944,GO:0097159,GO:0097367,GO:1901265,GO:1901363	-	-	-	-	-	-	-	-	-	Usp
Ssa01000210.t1	3847.GLYMA10G28890.1	3.12e-207	584	KOG0674@1|root,KOG0674@2759|Eukaryota,37I5F@33090|Viridiplantae,3GA8C@35493|Streptophyta,4JI3A@91835|fabids	35493|Streptophyta	O	Calreticulin	-	GO:0005575,GO:0005576,GO:0005622,GO:0005623,GO:0005737,GO:0005739,GO:0005773,GO:0005774,GO:0005783,GO:0005788,GO:0005911,GO:0006950,GO:0006970,GO:0006979,GO:0008150,GO:0009506,GO:0009507,GO:0009536,GO:0009628,GO:0009651,GO:0010035,GO:0010038,GO:0012505,GO:0016020,GO:0030054,GO:0031090,GO:0031974,GO:0042221,GO:0043226,GO:0043227,GO:0043229,GO:0043231,GO:0043233,GO:0044422,GO:0044424,GO:0044432,GO:…	-	ko:K08057	ko04141,ko04145,ko04612,ko05142,ko05166,map04141,map04145,map04612,map05142,map05166	-	-	-	ko00000,ko00001,ko03110,ko04091	-	-	Calreticulin
Ssa01000211.t1	3760.EMJ06787	1.41e-156	449	COG0564@1|root,KOG1919@2759|Eukaryota,37PUS@33090|Viridiplantae,3GBP5@35493|Streptophyta,4JJ18@91835|fabids	35493|Streptophyta	A	synthase	-	GO:0001522,GO:0003674,GO:0003824,GO:0005575,GO:0005622,GO:0005623,GO:0005737,GO:0005739,GO:0006139,GO:0006396,GO:0006399,GO:0006400,GO:0006725,GO:0006807,GO:0008033,GO:0008150,GO:0008152,GO:0009451,GO:0009982,GO:0009987,GO:0010467,GO:0016070,GO:0016853,GO:0016866,GO:0031119,GO:0034470,GO:0034641,GO:0034660,GO:0043170,GO:0043226,GO:0043227,GO:0043229,GO:0043231,GO:0043412,GO:0044237,GO:0044238,GO:…	3.4.21.53	ko:K08675	-	-	-	-	ko00000,ko01000,ko01002,ko03029	-	-	PseudoU_synth_2
Ssa01000211.t2	3760.EMJ06787	1.58e-156	449	COG0564@1|root,KOG1919@2759|Eukaryota,37PUS@33090|Viridiplantae,3GBP5@35493|Streptophyta,4JJ18@91835|fabids	35493|Streptophyta	A	synthase	-	GO:0001522,GO:0003674,GO:0003824,GO:0005575,GO:0005622,GO:0005623,GO:0005737,GO:0005739,GO:0006139,GO:0006396,GO:0006399,GO:0006400,GO:0006725,GO:0006807,GO:0008033,GO:0008150,GO:0008152,GO:0009451,GO:0009982,GO:0009987,GO:0010467,GO:0016070,GO:0016853,GO:0016866,GO:0031119,GO:0034470,GO:0034641,GO:0034660,GO:0043170,GO:0043226,GO:0043227,GO:0043229,GO:0043231,GO:0043412,GO:0044237,GO:0044238,GO:…	3.4.21.53	ko:K08675	-	-	-	-	ko00000,ko01000,ko01002,ko03029	-	-	PseudoU_synth_2
Ssa01000212.t1	3885.XP_007163324.1	1.4e-258	720	COG0216@1|root,KOG2726@2759|Eukaryota,37IC5@33090|Viridiplantae,3GED0@35493|Streptophyta,4JDQ0@91835|fabids	35493|Streptophyta	J	Peptide chain release factor	-	-	-	ko:K02836	-	-	-	-	ko00000,ko03012	-	-	PCRF,RF-1
Ssa01000212.t2	3847.GLYMA19G41651.1	8.64e-219	612	COG0216@1|root,KOG2726@2759|Eukaryota,37IC5@33090|Viridiplantae,3GED0@35493|Streptophyta,4JDQ0@91835|fabids	35493|Streptophyta	J	Peptide chain release factor	-	-	-	ko:K02836	-	-	-	-	ko00000,ko03012	-	-	PCRF,RF-1
Ssa01000213.t1	3847.GLYMA20G23010.1	0	1569	COG0466@1|root,KOG2004@2759|Eukaryota,37IS1@33090|Viridiplantae,3G769@35493|Streptophyta,4JDE9@91835|fabids	35493|Streptophyta	O	ATP-dependent serine protease that mediates the selective degradation of misfolded, unassembled or oxidatively damaged polypeptides as well as certain short-lived regulatory proteins in the mitochondrial matrix. May also have a chaperone function in the assembly of inner membrane protein complexes. Participates in the regulation of mitochondrial gene expression and in the maintenance of the integ…	-	GO:0000166,GO:0003674,GO:0003824,GO:0004176,GO:0005488,GO:0005524,GO:0005575,GO:0005622,GO:0005623,GO:0005737,GO:0005739,GO:0005759,GO:0005829,GO:0006508,GO:0006515,GO:0006807,GO:0006996,GO:0007005,GO:0008144,GO:0008150,GO:0008152,GO:0008233,GO:0009056,GO:0009057,GO:0009987,GO:0016043,GO:0016462,GO:0016787,GO:0016817,GO:0016818,GO:0016887,GO:0017076,GO:0017111,GO:0019538,GO:0030163,GO:0030554,GO:…	3.4.21.53	ko:K08675	-	-	-	-	ko00000,ko01000,ko01002,ko03029	-	-	AAA,LON_substr_bdg,Lon_C
Ssa01000214.t1	3885.XP_007163322.1	8.52e-169	478	28MAT@1|root,2QTU6@2759|Eukaryota,37J7E@33090|Viridiplantae,3G8DD@35493|Streptophyta,4JI58@91835|fabids	35493|Streptophyta	S	nicotianamine	NAS3	GO:0000003,GO:0000902,GO:0000904,GO:0003006,GO:0006810,GO:0007275,GO:0008150,GO:0009555,GO:0009653,GO:0009826,GO:0009856,GO:0009860,GO:0009932,GO:0009987,GO:0010232,GO:0010233,GO:0016043,GO:0016049,GO:0022414,GO:0030154,GO:0032501,GO:0032502,GO:0032989,GO:0040007,GO:0044706,GO:0048229,GO:0048468,GO:0048588,GO:0048589,GO:0048856,GO:0048868,GO:0048869,GO:0051179,GO:0051234,GO:0051704,GO:0060560,GO:…	2.5.1.43	ko:K05953	-	-	-	-	ko00000,ko01000	-	-	NAS
Ssa01000215.t1	3847.GLYMA20G22986.1	8.29e-131	381	KOG0773@1|root,KOG0773@2759|Eukaryota,37MHB@33090|Viridiplantae,3GX7B@35493|Streptophyta,4JNMS@91835|fabids	35493|Streptophyta	K	Homeobox protein knotted-1-like	-	-	-	ko:K16670	-	-	-	-	ko00000,ko03000	-	-	ELK,Homeobox_KN,KNOX1,KNOX2
Ssa01000216.t1	3885.XP_007145005.1	4.77e-138	422	KOG0379@1|root,KOG0379@2759|Eukaryota,37NTE@33090|Viridiplantae,3GF5R@35493|Streptophyta,4JKKV@91835|fabids	35493|Streptophyta	S	Kelch motif	-	GO:0005575,GO:0005622,GO:0005623,GO:0005737,GO:0005768,GO:0010008,GO:0012505,GO:0016020,GO:0031090,GO:0031410,GO:0031982,GO:0043226,GO:0043227,GO:0043229,GO:0044422,GO:0044424,GO:0044433,GO:0044440,GO:0044444,GO:0044446,GO:0044464,GO:0097708,GO:0098588,GO:0098805	-	ko:K20285	-	-	-	-	ko00000,ko04131	-	-	Kelch_3,Kelch_4
Ssa01000217.t1	3827.XP_004495645.1	9.68e-151	444	KOG2601@1|root,KOG2601@2759|Eukaryota,37PEX@33090|Viridiplantae,3GAYU@35493|Streptophyta,4JG1X@91835|fabids	35493|Streptophyta	P	Solute carrier family 40 member 3	-	GO:0003674,GO:0005215,GO:0005575,GO:0005622,GO:0005623,GO:0005737,GO:0006873,GO:0006875,GO:0006879,GO:0008150,GO:0009507,GO:0009526,GO:0009536,GO:0009941,GO:0009987,GO:0019725,GO:0030003,GO:0031967,GO:0031975,GO:0042592,GO:0043226,GO:0043227,GO:0043229,GO:0043231,GO:0044422,GO:0044424,GO:0044434,GO:0044435,GO:0044444,GO:0044446,GO:0044464,GO:0046916,GO:0048878,GO:0050801,GO:0055065,GO:0055072,GO:…	-	ko:K14685	ko04216,ko04978,map04216,map04978	-	-	-	ko00000,ko00001,ko02000	2.A.100.1	-	FPN1
Ssa01000218.t1	3847.GLYMA10G28753.1	7.58e-126	370	COG4677@1|root,2QVK0@2759|Eukaryota,37NXJ@33090|Viridiplantae,3G7RE@35493|Streptophyta,4JMRQ@91835|fabids	35493|Streptophyta	G	pectinesterase	-	-	3.1.1.11	ko:K01051	ko00040,ko01100,map00040,map01100	M00081	R02362	RC00460,RC00461	ko00000,ko00001,ko00002,ko01000	-	-	Pectinesterase
Ssa01000219.t1	3847.GLYMA10G28740.1	5.79e-60	193	2A286@1|root,2RY2C@2759|Eukaryota,37TWB@33090|Viridiplantae,3GJD0@35493|Streptophyta,4JQ7B@91835|fabids	35493|Streptophyta	K	transcription factor	-	GO:0003674,GO:0003700,GO:0006355,GO:0008150,GO:0009889,GO:0010468,GO:0010556,GO:0019219,GO:0019222,GO:0031323,GO:0031326,GO:0050789,GO:0050794,GO:0051171,GO:0051252,GO:0060255,GO:0065007,GO:0080090,GO:0140110,GO:1903506,GO:2000112,GO:2001141	-	-	-	-	-	-	-	-	-	-
Ssa01000220.t1	3847.GLYMA20G22830.2	0	963	KOG2551@1|root,KOG2551@2759|Eukaryota,37HI1@33090|Viridiplantae,3GABF@35493|Streptophyta,4JFY4@91835|fabids	35493|Streptophyta	E	Rhodanese-like domain-containing protein	-	-	-	-	-	-	-	-	-	-	-	FSH1,Rhodanese_C
Ssa01000221.t1	71139.XP_010024143.1	4.22e-86	256	2C4CF@1|root,2RYFH@2759|Eukaryota,37UZC@33090|Viridiplantae,3GIEB@35493|Streptophyta	35493|Streptophyta	S	Protein of unknown function, DUF538	-	-	-	-	-	-	-	-	-	-	-	DUF538
Ssa01000222.t1	3847.GLYMA10G28640.1	0	960	2CN07@1|root,2QT23@2759|Eukaryota,37IHS@33090|Viridiplantae,3G7R0@35493|Streptophyta,4JED4@91835|fabids	35493|Streptophyta	S	Alkaline neutral invertase	-	GO:0000302,GO:0003674,GO:0003824,GO:0004553,GO:0004564,GO:0004575,GO:0005575,GO:0005622,GO:0005623,GO:0005737,GO:0005739,GO:0005975,GO:0005984,GO:0005985,GO:0005987,GO:0006950,GO:0006979,GO:0007275,GO:0008150,GO:0008152,GO:0009056,GO:0009311,GO:0009313,GO:0009636,GO:0009987,GO:0010035,GO:0015926,GO:0016052,GO:0016787,GO:0016798,GO:0022622,GO:0032501,GO:0032502,GO:0042221,GO:0042493,GO:0042542,GO:…	-	-	-	-	-	-	-	-	-	Glyco_hydro_100
Ssa01000223.t1	3847.GLYMA03G38960.1	3.89e-132	381	28MGW@1|root,2QU0F@2759|Eukaryota,37JTI@33090|Viridiplantae,3G7W2@35493|Streptophyta,4JEUI@91835|fabids	35493|Streptophyta	S	PsbP domain-containing protein 1	-	GO:0005575,GO:0005622,GO:0005623,GO:0005737,GO:0006091,GO:0008150,GO:0008152,GO:0009507,GO:0009532,GO:0009534,GO:0009535,GO:0009536,GO:0009543,GO:0009570,GO:0009579,GO:0009987,GO:0015979,GO:0016020,GO:0016043,GO:0019684,GO:0022607,GO:0031976,GO:0031977,GO:0031978,GO:0031984,GO:0034357,GO:0034622,GO:0042651,GO:0043226,GO:0043227,GO:0043229,GO:0043231,GO:0043933,GO:0044085,GO:0044237,GO:0044422,GO:…	-	-	-	-	-	-	-	-	-	PsbP
Ssa01000224.t1	3847.GLYMA10G28610.1	4.79e-196	548	COG5597@1|root,KOG1950@2759|Eukaryota,37MMR@33090|Viridiplantae,3G87B@35493|Streptophyta	35493|Streptophyta	G	Belongs to the glycosyltransferase 8 family	GolS4	GO:0000271,GO:0003674,GO:0003824,GO:0005488,GO:0005536,GO:0005975,GO:0005976,GO:0005977,GO:0005978,GO:0005996,GO:0006012,GO:0006073,GO:0006091,GO:0006112,GO:0006950,GO:0006979,GO:0008150,GO:0008152,GO:0008194,GO:0008378,GO:0008466,GO:0009058,GO:0009059,GO:0009250,GO:0009987,GO:0015980,GO:0016051,GO:0016740,GO:0016757,GO:0016758,GO:0019318,GO:0030246,GO:0033692,GO:0034637,GO:0034645,GO:0035250,GO:…	2.4.1.123	ko:K18819	ko00052,map00052	-	R01192	RC00005,RC00049,RC02748	ko00000,ko00001,ko01000	-	GT8	Glyco_transf_8
Ssa01000225.t1	3641.EOY07515	2.23e-201	561	COG4586@1|root,KOG2355@2759|Eukaryota,37P2G@33090|Viridiplantae,3GDCZ@35493|Streptophyta	35493|Streptophyta	K	ABC transporter I family member	-	-	-	ko:K12608	ko03018,map03018	-	-	-	ko00000,ko00001,ko03019	-	-	ABC_tran
Ssa01000226.t1	264402.Cagra.0483s0019.1.p	9.51e-128	363	COG1100@1|root,KOG0070@2759|Eukaryota,37PTM@33090|Viridiplantae	33090|Viridiplantae	U	Belongs to the small GTPase superfamily. Arf family	-	-	-	ko:K07937	ko04072,ko04144,ko05110,ko05134,map04072,map04144,map05110,map05134	-	-	-	ko00000,ko00001,ko04031,ko04131,ko04147	-	-	Arf
Ssa01000227.t1	3885.XP_007163305.1	2.31e-165	473	28N0B@1|root,2QW27@2759|Eukaryota,37QJJ@33090|Viridiplantae,3GA5D@35493|Streptophyta,4JKEF@91835|fabids	35493|Streptophyta	S	WAT1-related protein	-	GO:0003674,GO:0005215,GO:0005575,GO:0005622,GO:0005623,GO:0005737,GO:0005886,GO:0005887,GO:0005938,GO:0006810,GO:0007154,GO:0007165,GO:0008150,GO:0009719,GO:0009725,GO:0009733,GO:0009734,GO:0009755,GO:0009987,GO:0010033,GO:0016020,GO:0016021,GO:0022857,GO:0023052,GO:0031224,GO:0031226,GO:0032870,GO:0042221,GO:0044424,GO:0044425,GO:0044444,GO:0044459,GO:0044464,GO:0050789,GO:0050794,GO:0050896,GO:…	-	-	-	-	-	-	-	-	-	EamA
Ssa01000228.t1	3847.GLYMA03G38890.1	1.92e-206	577	28K72@1|root,2QTD0@2759|Eukaryota,37MQQ@33090|Viridiplantae,3GERS@35493|Streptophyta,4JDMJ@91835|fabids	35493|Streptophyta	S	Belongs to the 'GDSL' lipolytic enzyme family	-	GO:0005575,GO:0005622,GO:0005623,GO:0005737,GO:0009507,GO:0009532,GO:0009536,GO:0009570,GO:0043226,GO:0043227,GO:0043229,GO:0043231,GO:0044422,GO:0044424,GO:0044434,GO:0044435,GO:0044444,GO:0044446,GO:0044464	-	-	-	-	-	-	-	-	-	Lipase_GDSL
Ssa01000229.t1	3750.XP_008356898.1	1.6e-14	71.2	2E38B@1|root,2SACN@2759|Eukaryota,37X90@33090|Viridiplantae,3GKXN@35493|Streptophyta,4JVE0@91835|fabids	35493|Streptophyta	S	NPR1 interacting	-	-	-	-	-	-	-	-	-	-	-	NPR1_interact
Ssa01000230.t1	29760.VIT_14s0060g00630.t01	4.44e-131	375	COG2039@1|root,KOG4755@2759|Eukaryota,37KK7@33090|Viridiplantae,3G9YI@35493|Streptophyta	35493|Streptophyta	O	Pyrrolidone-carboxylate peptidase	-	GO:0005575,GO:0005622,GO:0005623,GO:0005737,GO:0044424,GO:0044464	3.4.19.3	ko:K01304	-	-	-	-	ko00000,ko01000,ko01002	-	-	Peptidase_C15
Ssa01000231.t1	29760.VIT_14s0060g00620.t01	1.56e-238	666	COG5434@1|root,2QPYK@2759|Eukaryota,37KKW@33090|Viridiplantae,3GCSI@35493|Streptophyta	35493|Streptophyta	G	Polygalacturonase	-	GO:0003674,GO:0003824,GO:0004553,GO:0004650,GO:0005575,GO:0005618,GO:0005623,GO:0008150,GO:0009664,GO:0009825,GO:0009827,GO:0009831,GO:0009987,GO:0016043,GO:0016049,GO:0016787,GO:0016798,GO:0030312,GO:0040007,GO:0042545,GO:0042547,GO:0044464,GO:0045229,GO:0071554,GO:0071555,GO:0071669,GO:0071840,GO:0071944	3.2.1.67	ko:K01213	ko00040,ko01100,map00040,map01100	M00081	R01982,R07413	RC00049	ko00000,ko00001,ko00002,ko01000	-	-	Glyco_hydro_28,Pectate_lyase_3
Ssa01000232.t1	29760.VIT_14s0060g00610.t01	7.42e-65	202	COG5136@1|root,KOG3454@2759|Eukaryota,37VGN@33090|Viridiplantae,3GJS8@35493|Streptophyta	35493|Streptophyta	A	Zinc finger CCCH domain-containing protein	-	GO:0005575,GO:0005622,GO:0005623,GO:0005634,GO:0005681,GO:0005689,GO:0032991,GO:0043226,GO:0043227,GO:0043229,GO:0043231,GO:0044422,GO:0044424,GO:0044428,GO:0044446,GO:0044464,GO:1990904	-	ko:K13152	-	-	-	-	ko00000,ko03041	-	-	zf-CCCH,zf-U1
Ssa01000232.t2	29760.VIT_14s0060g00610.t01	3.42e-75	228	COG5136@1|root,KOG3454@2759|Eukaryota,37VGN@33090|Viridiplantae,3GJS8@35493|Streptophyta	35493|Streptophyta	A	Zinc finger CCCH domain-containing protein	-	GO:0005575,GO:0005622,GO:0005623,GO:0005634,GO:0005681,GO:0005689,GO:0032991,GO:0043226,GO:0043227,GO:0043229,GO:0043231,GO:0044422,GO:0044424,GO:0044428,GO:0044446,GO:0044464,GO:1990904	-	ko:K13152	-	-	-	-	ko00000,ko03041	-	-	zf-CCCH,zf-U1
Ssa01000233.t1	3827.XP_004494519.1	0	1459	COG5028@1|root,KOG1985@2759|Eukaryota,37NGV@33090|Viridiplantae,3G91E@35493|Streptophyta,4JHHB@91835|fabids	35493|Streptophyta	U	Protein transport protein Sec24-like	-	GO:0000003,GO:0006275,GO:0006996,GO:0007029,GO:0007030,GO:0007276,GO:0008150,GO:0008156,GO:0008361,GO:0009889,GO:0009890,GO:0009892,GO:0009987,GO:0010256,GO:0010556,GO:0010558,GO:0010564,GO:0010605,GO:0010948,GO:0016043,GO:0019219,GO:0019222,GO:0019953,GO:0022414,GO:0031323,GO:0031324,GO:0031326,GO:0031327,GO:0032501,GO:0032504,GO:0032535,GO:0032875,GO:0032876,GO:0044703,GO:0045786,GO:0045934,GO:…	-	ko:K14007	ko04141,map04141	M00404	-	-	ko00000,ko00001,ko00002,ko04131	-	-	Gelsolin,Sec23_BS,Sec23_helical,Sec23_trunk,zf-Sec23_Sec24
Ssa01000234.t1	3847.GLYMA19G41380.2	4.61e-296	826	COG5072@1|root,KOG2464@2759|Eukaryota,37IAB@33090|Viridiplantae,3G9WZ@35493|Streptophyta,4JG6N@91835|fabids	35493|Streptophyta	D	Domain of unknown function	-	GO:0000278,GO:0003674,GO:0003824,GO:0004672,GO:0004674,GO:0005575,GO:0005622,GO:0005623,GO:0005634,GO:0005737,GO:0006325,GO:0006464,GO:0006468,GO:0006793,GO:0006796,GO:0006807,GO:0006996,GO:0007049,GO:0007154,GO:0007165,GO:0008150,GO:0008152,GO:0009987,GO:0016043,GO:0016301,GO:0016310,GO:0016569,GO:0016570,GO:0016572,GO:0016740,GO:0016772,GO:0016773,GO:0018107,GO:0018193,GO:0018210,GO:0019538,GO:…	2.7.11.1	ko:K16315	-	-	-	-	ko00000,ko01000,ko01001,ko03036	-	-	Haspin_kinase
Ssa01000235.t1	3827.XP_004495623.1	7.71e-170	504	28JJ6@1|root,2QRYC@2759|Eukaryota,37MWS@33090|Viridiplantae,3GG55@35493|Streptophyta,4JF1W@91835|fabids	35493|Streptophyta	S	Possibly involved in carbohydrate binding	-	GO:0001871,GO:0003674,GO:0003824,GO:0004553,GO:0005488,GO:0005575,GO:0005623,GO:0005886,GO:0016020,GO:0016787,GO:0016798,GO:0030246,GO:0030247,GO:0031224,GO:0031225,GO:0031226,GO:0044425,GO:0044459,GO:0044464,GO:0046658,GO:0071944	-	-	-	-	-	-	-	-	-	Glyco_hydro_17,X8
Ssa01000236.t1	3847.GLYMA10G28460.1	2.7e-162	464	28N3D@1|root,2QUNG@2759|Eukaryota,37SUT@33090|Viridiplantae,3G7A3@35493|Streptophyta,4JIVV@91835|fabids	35493|Streptophyta	S	protein self-association	-	GO:0003674,GO:0005488,GO:0005515,GO:0005575,GO:0005622,GO:0005623,GO:0005634,GO:0005635,GO:0005654,GO:0012505,GO:0031967,GO:0031974,GO:0031975,GO:0031981,GO:0043226,GO:0043227,GO:0043229,GO:0043231,GO:0043233,GO:0043621,GO:0044422,GO:0044424,GO:0044428,GO:0044446,GO:0044464,GO:0070013	-	-	-	-	-	-	-	-	-	-
Ssa01000237.t1	3847.GLYMA19G41360.1	0	904	28Q01@1|root,2QWNR@2759|Eukaryota,37S5Z@33090|Viridiplantae,3G8RF@35493|Streptophyta,4JMB2@91835|fabids	35493|Streptophyta	S	NYN domain	-	-	-	ko:K17573	-	-	-	-	ko00000,ko01009	-	-	NYN,OHA
Ssa01000238.t1	3983.cassava4.1_002103m	0	1219	28ITG@1|root,2QR4U@2759|Eukaryota,37P39@33090|Viridiplantae,3GE2D@35493|Streptophyta,4JKWM@91835|fabids	35493|Streptophyta	S	MuDR family transposase	-	-	-	ko:K17604	-	-	-	-	ko00000,ko01009	-	-	DBD_Tnp_Mut,MULE,PB1,SWIM
Ssa01000238.t3	3983.cassava4.1_002103m	0	1227	28ITG@1|root,2QR4U@2759|Eukaryota,37P39@33090|Viridiplantae,3GE2D@35493|Streptophyta,4JKWM@91835|fabids	35493|Streptophyta	S	MuDR family transposase	-	-	-	ko:K17604	-	-	-	-	ko00000,ko01009	-	-	DBD_Tnp_Mut,MULE,PB1,SWIM
Ssa01000238.t2	3983.cassava4.1_002103m	0	1227	28ITG@1|root,2QR4U@2759|Eukaryota,37P39@33090|Viridiplantae,3GE2D@35493|Streptophyta,4JKWM@91835|fabids	35493|Streptophyta	S	MuDR family transposase	-	-	-	ko:K17604	-	-	-	-	ko00000,ko01009	-	-	DBD_Tnp_Mut,MULE,PB1,SWIM
Ssa01000239.t2	3847.GLYMA03G38740.3	3.19e-184	522	COG1104@1|root,KOG1549@2759|Eukaryota,37Q8I@33090|Viridiplantae,3G98M@35493|Streptophyta,4JFED@91835|fabids	35493|Streptophyta	E	Aminotransferase class-V	-	-	4.4.1.28	ko:K22207	ko00270,map00270	-	R00782	RC00382	ko00000,ko00001,ko01000	-	-	Aminotran_5
Ssa01000239.t1	3847.GLYMA03G38740.3	8.72e-255	707	COG1104@1|root,KOG1549@2759|Eukaryota,37Q8I@33090|Viridiplantae,3G98M@35493|Streptophyta,4JFED@91835|fabids	35493|Streptophyta	E	Aminotransferase class-V	-	-	4.4.1.28	ko:K22207	ko00270,map00270	-	R00782	RC00382	ko00000,ko00001,ko01000	-	-	Aminotran_5
Ssa01000240.t1	3885.XP_007145042.1	5.82e-59	182	2BEIC@1|root,2S14W@2759|Eukaryota,37VDC@33090|Viridiplantae,3GJC0@35493|Streptophyta,4JQDB@91835|fabids	35493|Streptophyta	-	-	-	-	-	-	-	-	-	-	-	-	-	-
Ssa01000240.t2	3885.XP_007145042.1	1.22e-51	165	2BEIC@1|root,2S14W@2759|Eukaryota,37VDC@33090|Viridiplantae,3GJC0@35493|Streptophyta,4JQDB@91835|fabids	35493|Streptophyta	-	-	-	-	-	-	-	-	-	-	-	-	-	-
Ssa01000241.t1	3847.GLYMA20G22400.1	1.49e-295	815	KOG1339@1|root,KOG1339@2759|Eukaryota,37P32@33090|Viridiplantae,3G95Y@35493|Streptophyta,4JJNU@91835|fabids	35493|Streptophyta	O	Belongs to the peptidase A1 family	-	GO:0003674,GO:0003824,GO:0004175,GO:0004190,GO:0006508,GO:0006807,GO:0008150,GO:0008152,GO:0008233,GO:0009056,GO:0009057,GO:0016787,GO:0019538,GO:0030163,GO:0043170,GO:0044238,GO:0070001,GO:0070011,GO:0071704,GO:0140096,GO:1901564,GO:1901565,GO:1901575	3.4.23.40	ko:K08245	-	-	-	-	ko00000,ko01000,ko01002	-	-	Asp,SapB_1,SapB_2
Ssa01000242.t1	3827.XP_004494508.1	2.57e-287	794	KOG1339@1|root,KOG1339@2759|Eukaryota,37P32@33090|Viridiplantae,3G95Y@35493|Streptophyta,4JJNU@91835|fabids	35493|Streptophyta	O	Belongs to the peptidase A1 family	-	GO:0003674,GO:0003824,GO:0004175,GO:0004190,GO:0006508,GO:0006807,GO:0008150,GO:0008152,GO:0008233,GO:0009056,GO:0009057,GO:0016787,GO:0019538,GO:0030163,GO:0043170,GO:0044238,GO:0070001,GO:0070011,GO:0071704,GO:0140096,GO:1901564,GO:1901565,GO:1901575	3.4.23.40	ko:K08245	-	-	-	-	ko00000,ko01000,ko01002	-	-	Asp,SapB_1,SapB_2
Ssa01000243.t1	3885.XP_007163288.1	2.96e-87	267	KOG2184@1|root,KOG2184@2759|Eukaryota,37SFU@33090|Viridiplantae,3GASG@35493|Streptophyta,4JK10@91835|fabids	35493|Streptophyta	A	G patch domain-containing protein	-	-	-	-	-	-	-	-	-	-	-	G-patch,zf-C2H2_jaz
Ssa01000243.t2	29760.VIT_14s0060g00320.t01	5.45e-96	290	KOG2184@1|root,KOG2184@2759|Eukaryota,37SFU@33090|Viridiplantae,3GASG@35493|Streptophyta	35493|Streptophyta	A	G patch domain-containing protein	-	-	-	-	-	-	-	-	-	-	-	G-patch,zf-C2H2_jaz
Ssa01000243.t3	3885.XP_007163288.1	2.2e-123	362	KOG2184@1|root,KOG2184@2759|Eukaryota,37SFU@33090|Viridiplantae,3GASG@35493|Streptophyta,4JK10@91835|fabids	35493|Streptophyta	A	G patch domain-containing protein	-	-	-	-	-	-	-	-	-	-	-	G-patch,zf-C2H2_jaz
Ssa01000244.t1	3885.XP_007163287.1	3.45e-19	81.6	2CQAW@1|root,2R494@2759|Eukaryota,37XHK@33090|Viridiplantae,3GMHJ@35493|Streptophyta,4JV4N@91835|fabids	35493|Streptophyta	-	-	-	-	-	-	-	-	-	-	-	-	-	-
Ssa01000245.t2	3847.GLYMA10G28330.1	2.18e-20	84.3	2DXW5@1|root,2S6TA@2759|Eukaryota,37WW2@33090|Viridiplantae,3GM3M@35493|Streptophyta,4JV94@91835|fabids	35493|Streptophyta	S	Encoded by	-	-	-	-	-	-	-	-	-	-	-	DUF761
Ssa01000245.t1	3847.GLYMA10G28330.1	1.21e-20	84.7	2DXW5@1|root,2S6TA@2759|Eukaryota,37WW2@33090|Viridiplantae,3GM3M@35493|Streptophyta,4JV94@91835|fabids	35493|Streptophyta	S	Encoded by	-	-	-	-	-	-	-	-	-	-	-	DUF761
Ssa01000246.t1	3885.XP_007145046.1	6.68e-16	72.4	2DXW5@1|root,2S6TA@2759|Eukaryota,37WW2@33090|Viridiplantae,3GM3M@35493|Streptophyta,4JV94@91835|fabids	35493|Streptophyta	S	Encoded by	-	-	-	-	-	-	-	-	-	-	-	DUF761
Ssa01000247.t1	4098.XP_009618268.1	3.89e-43	149	COG5068@1|root,KOG0014@2759|Eukaryota,37RGR@33090|Viridiplantae,3GDTT@35493|Streptophyta,44E1H@71274|asterids	35493|Streptophyta	K	Agamous-like MADS-box protein AGL80	-	-	-	-	-	-	-	-	-	-	-	SRF-TF
Ssa01000248.t1	3827.XP_004494506.1	8.06e-33	113	KOG1773@1|root,KOG1773@2759|Eukaryota,37WUE@33090|Viridiplantae,3GKT8@35493|Streptophyta,4JR08@91835|fabids	35493|Streptophyta	S	Hydrophobic protein	-	-	-	-	-	-	-	-	-	-	-	Pmp3
Ssa01000249.t1	3847.GLYMA20G22291.1	5.48e-251	720	2CNCU@1|root,2QV9I@2759|Eukaryota,37NBF@33090|Viridiplantae,3GCC0@35493|Streptophyta,4JNN6@91835|fabids	35493|Streptophyta	K	transcription factor	PIF3	GO:0000976,GO:0001067,GO:0001101,GO:0003674,GO:0003676,GO:0003677,GO:0003690,GO:0003700,GO:0005488,GO:0005515,GO:0005575,GO:0005622,GO:0005623,GO:0005634,GO:0006355,GO:0007154,GO:0007165,GO:0007275,GO:0008150,GO:0009314,GO:0009416,GO:0009628,GO:0009639,GO:0009640,GO:0009704,GO:0009719,GO:0009725,GO:0009739,GO:0009740,GO:0009755,GO:0009791,GO:0009889,GO:0009893,GO:0009987,GO:0010017,GO:0010033,GO:…	-	ko:K12126	ko04075,ko04712,map04075,map04712	-	-	-	ko00000,ko00001,ko03000	-	-	HLH
Ssa01000250.t1	3885.XP_007145055.1	3.69e-29	134	KOG1181@1|root,KOG1181@2759|Eukaryota,37XU5@33090|Viridiplantae,3GMKP@35493|Streptophyta,4JR2F@91835|fabids	35493|Streptophyta	S	tissue development	-	-	-	-	-	-	-	-	-	-	-	-
Ssa01000251.t1	3847.GLYMA19G41250.2	4.99e-177	508	COG5147@1|root,KOG0048@2759|Eukaryota,37HZX@33090|Viridiplantae,3GABD@35493|Streptophyta,4JM2D@91835|fabids	35493|Streptophyta	K	Transcription factor	-	GO:0000003,GO:0000981,GO:0000988,GO:0000989,GO:0001067,GO:0001076,GO:0001134,GO:0001135,GO:0003006,GO:0003674,GO:0003676,GO:0003677,GO:0003700,GO:0005488,GO:0005575,GO:0005622,GO:0005623,GO:0005634,GO:0006355,GO:0006357,GO:0007275,GO:0008150,GO:0009719,GO:0009725,GO:0009733,GO:0009791,GO:0009888,GO:0009889,GO:0009987,GO:0010033,GO:0010087,GO:0010089,GO:0010119,GO:0010154,GO:0010214,GO:0010468,GO:…	-	ko:K09422	-	-	-	-	ko00000,ko03000	-	-	Myb_DNA-binding
Ssa01000252.t1	3827.XP_004495820.1	0	923	COG3104@1|root,KOG1237@2759|Eukaryota,37Q3F@33090|Viridiplantae,3GAUR@35493|Streptophyta,4JHK0@91835|fabids	35493|Streptophyta	E	Protein NRT1 PTR FAMILY 4.5-like	-	GO:0003674,GO:0005215,GO:0005319,GO:0005342,GO:0005575,GO:0005623,GO:0005886,GO:0006810,GO:0006811,GO:0006820,GO:0006869,GO:0008028,GO:0008150,GO:0008509,GO:0008514,GO:0009605,GO:0009607,GO:0009624,GO:0010119,GO:0010876,GO:0015075,GO:0015318,GO:0015665,GO:0015711,GO:0015718,GO:0015849,GO:0015850,GO:0016020,GO:0022857,GO:0033036,GO:0034220,GO:0043207,GO:0044464,GO:0046864,GO:0046865,GO:0046942,GO:…	-	ko:K14638	-	-	-	-	ko00000,ko02000	2.A.17.3	-	PTR2
Ssa01000253.t1	3847.GLYMA20G22190.1	1.21e-234	653	COG0258@1|root,KOG2519@2759|Eukaryota,37MC4@33090|Viridiplantae,3G9DG@35493|Streptophyta,4JDRI@91835|fabids	35493|Streptophyta	L	Structure-specific nuclease with 5'-flap endonuclease and 5'-3' exonuclease activities involved in DNA replication and repair. During DNA replication, cleaves the 5'-overhanging flap structure that is generated by displacement synthesis when DNA polymerase encounters the 5'-end of a downstream Okazaki fragment. It enters the flap from the 5'-end and then tracks to cleave the flap base, leaving a …	FEN1	-	-	ko:K04799	ko03030,ko03410,ko03450,map03030,map03410,map03450	-	-	-	ko00000,ko00001,ko01000,ko03032,ko03400,ko04147	-	-	XPG_I,XPG_N
Ssa01000253.t2	3847.GLYMA20G22190.1	1.08e-222	622	COG0258@1|root,KOG2519@2759|Eukaryota,37MC4@33090|Viridiplantae,3G9DG@35493|Streptophyta,4JDRI@91835|fabids	35493|Streptophyta	L	Structure-specific nuclease with 5'-flap endonuclease and 5'-3' exonuclease activities involved in DNA replication and repair. During DNA replication, cleaves the 5'-overhanging flap structure that is generated by displacement synthesis when DNA polymerase encounters the 5'-end of a downstream Okazaki fragment. It enters the flap from the 5'-end and then tracks to cleave the flap base, leaving a …	FEN1	-	-	ko:K04799	ko03030,ko03410,ko03450,map03030,map03410,map03450	-	-	-	ko00000,ko00001,ko01000,ko03032,ko03400,ko04147	-	-	XPG_I,XPG_N
Ssa01000254.t1	3847.GLYMA03G38630.1	1.93e-119	345	2BYKQ@1|root,2QQ4A@2759|Eukaryota,37KIT@33090|Viridiplantae,3GCHI@35493|Streptophyta,4JGR5@91835|fabids	35493|Streptophyta	O	germin-like protein	-	-	-	-	-	-	-	-	-	-	-	Cupin_1
Ssa01000255.t1	3847.GLYMA20G22170.1	0	1282	COG0008@1|root,KOG1147@2759|Eukaryota,37Q9I@33090|Viridiplantae,3GA4G@35493|Streptophyta,4JHXU@91835|fabids	35493|Streptophyta	J	Belongs to the class-I aminoacyl-tRNA synthetase family	-	GO:0002181,GO:0002376,GO:0003674,GO:0003676,GO:0003723,GO:0003824,GO:0004812,GO:0004818,GO:0004827,GO:0005488,GO:0005515,GO:0005575,GO:0005622,GO:0005623,GO:0005737,GO:0005829,GO:0005886,GO:0006082,GO:0006139,GO:0006399,GO:0006412,GO:0006417,GO:0006418,GO:0006424,GO:0006433,GO:0006518,GO:0006520,GO:0006725,GO:0006807,GO:0006810,GO:0006811,GO:0006820,GO:0006869,GO:0006950,GO:0006952,GO:0006955,GO:…	6.1.1.17	ko:K01885	ko00860,ko00970,ko01100,ko01110,ko01120,map00860,map00970,map01100,map01110,map01120	M00121,M00359,M00360	R05578	RC00055,RC00523	ko00000,ko00001,ko00002,ko01000,ko01007,ko02048,ko03016	-	-	GST_C,GST_C_3,tRNA-synt_1c,tRNA-synt_1c_C
Ssa01000256.t1	3885.XP_007145064.1	0	1963	COG4251@1|root,2QRSA@2759|Eukaryota,37MYW@33090|Viridiplantae,3GE5G@35493|Streptophyta,4JD33@91835|fabids	35493|Streptophyta	K	Regulatory photoreceptor which exists in two forms that are reversibly interconvertible by light the Pr form that absorbs maximally in the red region of the spectrum and the Pfr form that absorbs maximally in the far-red region	PHYA	GO:0003674,GO:0003676,GO:0003723,GO:0003729,GO:0003824,GO:0004672,GO:0005488,GO:0005515,GO:0005575,GO:0005622,GO:0005623,GO:0005634,GO:0005654,GO:0005737,GO:0006417,GO:0006464,GO:0006468,GO:0006793,GO:0006796,GO:0006807,GO:0007154,GO:0007165,GO:0007275,GO:0007602,GO:0008150,GO:0008152,GO:0009314,GO:0009416,GO:0009581,GO:0009582,GO:0009583,GO:0009585,GO:0009605,GO:0009606,GO:0009628,GO:0009629,GO:…	-	ko:K12120	ko04712,map04712	-	-	-	ko00000,ko00001	-	-	GAF,HATPase_c,HisKA,PAS,PAS_2,PHY
Ssa01000257.t2	3885.XP_007163277.1	8.07e-32	117	2E0IU@1|root,2S7Z2@2759|Eukaryota,37WQV@33090|Viridiplantae,3GKT2@35493|Streptophyta,4JQZQ@91835|fabids	35493|Streptophyta	-	-	-	-	-	-	-	-	-	-	-	-	-	-
Ssa01000258.t1	3827.XP_004509778.1	0	1080	COG0532@1|root,KOG1145@2759|Eukaryota,37QKM@33090|Viridiplantae,3GBUU@35493|Streptophyta,4JN4Q@91835|fabids	35493|Streptophyta	J	Translation initiation factor	-	-	-	ko:K02519	-	-	-	-	ko00000,ko03012,ko03029	-	-	GTP_EFTU,IF-2
Ssa01000259.t1	3847.GLYMA10G28150.1	6.61e-39	132	2DZMW@1|root,2S754@2759|Eukaryota,37WY6@33090|Viridiplantae,3GM2Y@35493|Streptophyta,4JR51@91835|fabids	35493|Streptophyta	-	-	-	-	-	-	-	-	-	-	-	-	-	-
Ssa01000260.t2	3847.GLYMA19G41181.1	1.48e-29	111	2DE22@1|root,2S5P8@2759|Eukaryota,37WCH@33090|Viridiplantae,3GM04@35493|Streptophyta,4JQVX@91835|fabids	35493|Streptophyta	-	-	-	-	-	-	-	-	-	-	-	-	-	-
Ssa01000260.t1	3847.GLYMA19G41181.1	4.12e-30	113	2DE22@1|root,2S5P8@2759|Eukaryota,37WCH@33090|Viridiplantae,3GM04@35493|Streptophyta,4JQVX@91835|fabids	35493|Streptophyta	-	-	-	-	-	-	-	-	-	-	-	-	-	-
Ssa01000261.t1	3885.XP_007163274.1	2.05e-38	132	2DZFU@1|root,2S6ZZ@2759|Eukaryota,37WQ5@33090|Viridiplantae,3GM6Y@35493|Streptophyta,4JQYT@91835|fabids	35493|Streptophyta	-	-	-	-	-	-	-	-	-	-	-	-	-	-
Ssa01000262.t1	3656.XP_008452971.1	3.15e-254	702	KOG2641@1|root,KOG2641@2759|Eukaryota,37I5P@33090|Viridiplantae,3G9H6@35493|Streptophyta,4JMCR@91835|fabids	35493|Streptophyta	T	Transmembrane protein 184A-like	-	-	-	-	-	-	-	-	-	-	-	Solute_trans_a
Ssa01000263.t1	3885.XP_007163270.1	0	2147	28MA0@1|root,2QTTC@2759|Eukaryota,37Q5T@33090|Viridiplantae,3G800@35493|Streptophyta,4JMMI@91835|fabids	35493|Streptophyta	S	CONTAINS InterPro DOMAIN s WD40 repeat-like (InterPro IPR011046), WD40 repeat, region (InterPro IPR017986), WD40 repeat (InterPro IPR001680), WD40 YVTN repeat-like (InterPro IPR015943)	-	-	-	-	-	-	-	-	-	-	-	WD40
Ssa01000264.t2	3847.GLYMA19G41120.1	1.87e-217	604	COG4870@1|root,KOG1543@2759|Eukaryota,37QZK@33090|Viridiplantae,3G9A2@35493|Streptophyta,4JG84@91835|fabids	35493|Streptophyta	O	Belongs to the peptidase C1 family	-	GO:0000323,GO:0003674,GO:0003824,GO:0004175,GO:0004197,GO:0005575,GO:0005576,GO:0005615,GO:0005622,GO:0005623,GO:0005737,GO:0005764,GO:0005773,GO:0005829,GO:0006508,GO:0006807,GO:0008150,GO:0008152,GO:0008233,GO:0008234,GO:0009056,GO:0009057,GO:0009987,GO:0016787,GO:0019538,GO:0030163,GO:0043170,GO:0043226,GO:0043227,GO:0043229,GO:0043231,GO:0044237,GO:0044238,GO:0044248,GO:0044257,GO:0044260,GO:…	3.4.22.1	ko:K01363	ko04140,ko04142,ko04210,ko04612,ko04621,ko04924,map04140,map04142,map04210,map04612,map04621,map04924	-	-	-	ko00000,ko00001,ko00536,ko01000,ko01002,ko03110,ko04147	-	-	Peptidase_C1,Propeptide_C1
Ssa01000264.t3	3847.GLYMA19G41120.1	3.09e-216	601	COG4870@1|root,KOG1543@2759|Eukaryota,37QZK@33090|Viridiplantae,3G9A2@35493|Streptophyta,4JG84@91835|fabids	35493|Streptophyta	O	Belongs to the peptidase C1 family	-	GO:0000323,GO:0003674,GO:0003824,GO:0004175,GO:0004197,GO:0005575,GO:0005576,GO:0005615,GO:0005622,GO:0005623,GO:0005737,GO:0005764,GO:0005773,GO:0005829,GO:0006508,GO:0006807,GO:0008150,GO:0008152,GO:0008233,GO:0008234,GO:0009056,GO:0009057,GO:0009987,GO:0016787,GO:0019538,GO:0030163,GO:0043170,GO:0043226,GO:0043227,GO:0043229,GO:0043231,GO:0044237,GO:0044238,GO:0044248,GO:0044257,GO:0044260,GO:…	3.4.22.1	ko:K01363	ko04140,ko04142,ko04210,ko04612,ko04621,ko04924,map04140,map04142,map04210,map04612,map04621,map04924	-	-	-	ko00000,ko00001,ko00536,ko01000,ko01002,ko03110,ko04147	-	-	Peptidase_C1,Propeptide_C1
Ssa01000264.t1	3847.GLYMA19G41120.1	2.42e-159	452	COG4870@1|root,KOG1543@2759|Eukaryota,37QZK@33090|Viridiplantae,3G9A2@35493|Streptophyta,4JG84@91835|fabids	35493|Streptophyta	O	Belongs to the peptidase C1 family	-	GO:0000323,GO:0003674,GO:0003824,GO:0004175,GO:0004197,GO:0005575,GO:0005576,GO:0005615,GO:0005622,GO:0005623,GO:0005737,GO:0005764,GO:0005773,GO:0005829,GO:0006508,GO:0006807,GO:0008150,GO:0008152,GO:0008233,GO:0008234,GO:0009056,GO:0009057,GO:0009987,GO:0016787,GO:0019538,GO:0030163,GO:0043170,GO:0043226,GO:0043227,GO:0043229,GO:0043231,GO:0044237,GO:0044238,GO:0044248,GO:0044257,GO:0044260,GO:…	3.4.22.1	ko:K01363	ko04140,ko04142,ko04210,ko04612,ko04621,ko04924,map04140,map04142,map04210,map04612,map04621,map04924	-	-	-	ko00000,ko00001,ko00536,ko01000,ko01002,ko03110,ko04147	-	-	Peptidase_C1,Propeptide_C1
Ssa01000265.t1	3847.GLYMA20G22070.1	0	2166	2CMG1@1|root,2QQ90@2759|Eukaryota,37NRX@33090|Viridiplantae,3G8K7@35493|Streptophyta,4JMA3@91835|fabids	35493|Streptophyta	S	Inositol hexakisphosphate	-	-	-	-	-	-	-	-	-	-	-	PTPlike_phytase
Ssa01000266.t1	3847.GLYMA19G41100.1	1.1e-275	765	COG1208@1|root,KOG1322@2759|Eukaryota,37JN6@33090|Viridiplantae,3GB0H@35493|Streptophyta,4JSTQ@91835|fabids	35493|Streptophyta	M	This protein plays a role in synthesis of starch. It catalyzes the synthesis of the activated glycosyl donor, ADP- glucose from Glc-1-P and ATP	-	-	2.7.7.27	ko:K00975	ko00500,ko00520,ko01100,ko01110,ko02026,map00500,map00520,map01100,map01110,map02026	M00565	R00948	RC00002	ko00000,ko00001,ko00002,ko01000	-	-	NTP_transferase
Ssa01000266.t2	3847.GLYMA19G41100.1	2.13e-295	816	COG1208@1|root,KOG1322@2759|Eukaryota,37JN6@33090|Viridiplantae,3GB0H@35493|Streptophyta,4JSTQ@91835|fabids	35493|Streptophyta	M	This protein plays a role in synthesis of starch. It catalyzes the synthesis of the activated glycosyl donor, ADP- glucose from Glc-1-P and ATP	-	-	2.7.7.27	ko:K00975	ko00500,ko00520,ko01100,ko01110,ko02026,map00500,map00520,map01100,map01110,map02026	M00565	R00948	RC00002	ko00000,ko00001,ko00002,ko01000	-	-	NTP_transferase
Ssa01000267.t1	3847.GLYMA19G41090.1	7.1e-203	572	COG3934@1|root,2QS4Q@2759|Eukaryota,37PFM@33090|Viridiplantae,3GCR2@35493|Streptophyta,4JE9Z@91835|fabids	35493|Streptophyta	G	Belongs to the glycosyl hydrolase 5 (cellulase A) family	-	GO:0000272,GO:0003674,GO:0003824,GO:0004553,GO:0004567,GO:0005975,GO:0005976,GO:0008150,GO:0008152,GO:0009056,GO:0009057,GO:0009987,GO:0010412,GO:0015923,GO:0016052,GO:0016787,GO:0016798,GO:0016985,GO:0016998,GO:0043170,GO:0044036,GO:0044237,GO:0044238,GO:0044247,GO:0044248,GO:0044260,GO:0044262,GO:0044264,GO:0044275,GO:0046355,GO:0071554,GO:0071704,GO:1901575	3.2.1.78	ko:K19355	ko00051,map00051	-	R01332	RC00467	ko00000,ko00001,ko01000	-	-	Cellulase
Ssa01000268.t2	2711.XP_006491442.1	4.89e-37	129	2CU89@1|root,2S4DD@2759|Eukaryota,37VXK@33090|Viridiplantae,3GJDY@35493|Streptophyta	35493|Streptophyta	-	-	-	-	-	-	-	-	-	-	-	-	-	-
Ssa01000268.t1	2711.XP_006491442.1	8.84e-37	128	2CU89@1|root,2S4DD@2759|Eukaryota,37VXK@33090|Viridiplantae,3GJDY@35493|Streptophyta	35493|Streptophyta	-	-	-	-	-	-	-	-	-	-	-	-	-	-
Ssa01000269.t1	3847.GLYMA10G28040.1	1.93e-166	467	2CMVV@1|root,2QS90@2759|Eukaryota,37JN4@33090|Viridiplantae,3GDKP@35493|Streptophyta,4JS30@91835|fabids	35493|Streptophyta	S	atexp17,atexpa17,athexp alpha 1.13,expa17	EXPA17	GO:0005575,GO:0005618,GO:0005623,GO:0007275,GO:0008150,GO:0009653,GO:0009664,GO:0009791,GO:0009827,GO:0009828,GO:0009987,GO:0010015,GO:0010101,GO:0010102,GO:0010311,GO:0016020,GO:0016043,GO:0022622,GO:0030312,GO:0032501,GO:0032502,GO:0042545,GO:0044464,GO:0045229,GO:0048364,GO:0048527,GO:0048528,GO:0048646,GO:0048731,GO:0048856,GO:0071554,GO:0071555,GO:0071669,GO:0071840,GO:0071944,GO:0090696,GO:…	-	-	-	-	-	-	-	-	-	DPBB_1,Pollen_allerg_1
Ssa01000270.t1	3847.GLYMA02G00910.1	1.41e-150	429	KOG3345@1|root,KOG3345@2759|Eukaryota,37I0R@33090|Viridiplantae,3G7SN@35493|Streptophyta,4JHFP@91835|fabids	35493|Streptophyta	S	Hepatocellular carcinoma-associated antigen 59	-	GO:0005575,GO:0005622,GO:0005623,GO:0005634,GO:0005654,GO:0007275,GO:0008150,GO:0009314,GO:0009416,GO:0009628,GO:0009637,GO:0009642,GO:0009644,GO:0009892,GO:0010099,GO:0010605,GO:0016604,GO:0016607,GO:0019222,GO:0022622,GO:0031323,GO:0031324,GO:0031396,GO:0031397,GO:0031399,GO:0031400,GO:0031974,GO:0031981,GO:0032268,GO:0032269,GO:0032501,GO:0032502,GO:0043086,GO:0043226,GO:0043227,GO:0043229,GO:…	-	-	-	-	-	-	-	-	-	Hep_59
Ssa01000271.t1	3885.XP_007145079.1	8.4e-119	343	2BYKQ@1|root,2QQ4A@2759|Eukaryota,37KIT@33090|Viridiplantae,3GCHI@35493|Streptophyta,4JDIF@91835|fabids	35493|Streptophyta	S	Germin-like protein subfamily 2 member	-	-	-	-	-	-	-	-	-	-	-	Cupin_1
Ssa01000272.t1	3847.GLYMA19G41060.4	0	1325	COG0631@1|root,KOG0700@2759|Eukaryota,37I37@33090|Viridiplantae,3G8CR@35493|Streptophyta,4JT9F@91835|fabids	35493|Streptophyta	T	Protein phosphatase 2C	-	GO:0003674,GO:0003824,GO:0004721,GO:0004722,GO:0005488,GO:0005543,GO:0005575,GO:0005623,GO:0005886,GO:0006355,GO:0006464,GO:0006470,GO:0006793,GO:0006796,GO:0006807,GO:0008150,GO:0008152,GO:0008289,GO:0009888,GO:0009889,GO:0009987,GO:0010073,GO:0010074,GO:0010468,GO:0010556,GO:0016020,GO:0016311,GO:0016787,GO:0016788,GO:0016791,GO:0019219,GO:0019222,GO:0019538,GO:0019827,GO:0031323,GO:0031326,GO:…	-	-	-	-	-	-	-	-	-	PP2C
Ssa01000273.t1	3847.GLYMA10G28000.1	4.59e-72	228	2CXIA@1|root,2RXSU@2759|Eukaryota,37U4U@33090|Viridiplantae,3GAUF@35493|Streptophyta,4JNZM@91835|fabids	35493|Streptophyta	S	Polyketide cyclase / dehydrase and lipid transport	-	-	-	-	-	-	-	-	-	-	-	Polyketide_cyc
Ssa01000273.t2	3847.GLYMA10G28000.1	1.62e-98	297	2CXIA@1|root,2RXSU@2759|Eukaryota,37U4U@33090|Viridiplantae,3GAUF@35493|Streptophyta,4JNZM@91835|fabids	35493|Streptophyta	S	Polyketide cyclase / dehydrase and lipid transport	-	-	-	-	-	-	-	-	-	-	-	Polyketide_cyc
Ssa01000274.t1	3847.GLYMA19G41050.1	1.23e-147	420	COG0652@1|root,KOG0880@2759|Eukaryota,37R0D@33090|Viridiplantae,3G9II@35493|Streptophyta,4JEHE@91835|fabids	35493|Streptophyta	O	PPIases accelerate the folding of proteins. It catalyzes the cis-trans isomerization of proline imidic peptide bonds in oligopeptides	-	GO:0005575,GO:0005622,GO:0005623,GO:0005737,GO:0009507,GO:0009532,GO:0009536,GO:0009570,GO:0043226,GO:0043227,GO:0043229,GO:0043231,GO:0044422,GO:0044424,GO:0044434,GO:0044435,GO:0044444,GO:0044446,GO:0044464	5.2.1.8	ko:K03768	-	-	-	-	ko00000,ko01000,ko03110	-	-	Pro_isomerase
Ssa01000275.t1	3847.GLYMA10G27980.10	5.12e-144	411	COG1011@1|root,KOG3109@2759|Eukaryota,37MSC@33090|Viridiplantae,3GFH9@35493|Streptophyta,4JKTJ@91835|fabids	35493|Streptophyta	S	Haloacid dehalogenase-like hydrolase	-	-	-	ko:K07025,ko:K18551	ko00760,map00760	-	R02323,R03346	RC00017	ko00000,ko00001,ko01000	-	-	HAD_2,Hydrolase_like
Ssa01000275.t2	3847.GLYMA10G27980.10	1.86e-143	411	COG1011@1|root,KOG3109@2759|Eukaryota,37MSC@33090|Viridiplantae,3GFH9@35493|Streptophyta,4JKTJ@91835|fabids	35493|Streptophyta	S	Haloacid dehalogenase-like hydrolase	-	-	-	ko:K07025,ko:K18551	ko00760,map00760	-	R02323,R03346	RC00017	ko00000,ko00001,ko01000	-	-	HAD_2,Hydrolase_like
Ssa01000276.t1	3827.XP_004495849.1	2e-235	655	KOG4287@1|root,KOG4287@2759|Eukaryota,37RWV@33090|Viridiplantae,3G7UB@35493|Streptophyta,4JS6H@91835|fabids	35493|Streptophyta	M	Hydrolyzes acetyl esters in homogalacturonan regions of pectin. In type I primary cell wall, galacturonic acid residues of pectin can be acetylated at the O-2 and O-3 positions. Decreasing the degree of acetylation of pectin gels in vitro alters their physical properties	-	GO:0003674,GO:0003824,GO:0005575,GO:0005618,GO:0005623,GO:0008150,GO:0009505,GO:0009987,GO:0016043,GO:0016787,GO:0016788,GO:0030312,GO:0044464,GO:0045229,GO:0052689,GO:0052793,GO:0071554,GO:0071555,GO:0071840,GO:0071944	3.1.1.98	ko:K19882	ko04310,map04310	-	R11202	RC00020,RC00041	ko00000,ko00001,ko01000	-	-	PAE
Ssa01000277.t1	3847.GLYMA03G38420.1	2.45e-52	176	28PBU@1|root,2QVZ7@2759|Eukaryota,37SZJ@33090|Viridiplantae,3G7J3@35493|Streptophyta,4JS2U@91835|fabids	35493|Streptophyta	-	-	-	-	-	-	-	-	-	-	-	-	-	-
Ssa01000278.t1	3847.GLYMA02G00960.2	2.74e-154	450	COG5147@1|root,KOG0048@2759|Eukaryota,37HZX@33090|Viridiplantae,3GABD@35493|Streptophyta,4JSY6@91835|fabids	35493|Streptophyta	K	SANT SWI3, ADA2, N-CoR and TFIIIB'' DNA-binding domains	-	-	-	ko:K09422	-	-	-	-	ko00000,ko03000	-	-	Myb_DNA-binding
Ssa01000279.t3	3847.GLYMA02G00991.2	2.44e-164	501	28ZQC@1|root,2R6IY@2759|Eukaryota,37SNM@33090|Viridiplantae,3GEU5@35493|Streptophyta,4JGBD@91835|fabids	35493|Streptophyta	S	meiotic cell cycle	-	GO:0000003,GO:0005575,GO:0005622,GO:0005623,GO:0005634,GO:0005694,GO:0005730,GO:0007049,GO:0008150,GO:0009987,GO:0010564,GO:0022414,GO:0031974,GO:0031981,GO:0033043,GO:0033044,GO:0040020,GO:0043226,GO:0043227,GO:0043228,GO:0043229,GO:0043231,GO:0043232,GO:0043233,GO:0044087,GO:0044422,GO:0044424,GO:0044428,GO:0044446,GO:0044464,GO:0050789,GO:0050794,GO:0051128,GO:0051321,GO:0051445,GO:0051726,GO:…	-	-	-	-	-	-	-	-	-	-
Ssa01000279.t1	3847.GLYMA02G00991.2	6.65e-180	542	28ZQC@1|root,2R6IY@2759|Eukaryota,37SNM@33090|Viridiplantae,3GEU5@35493|Streptophyta,4JGBD@91835|fabids	35493|Streptophyta	S	meiotic cell cycle	-	GO:0000003,GO:0005575,GO:0005622,GO:0005623,GO:0005634,GO:0005694,GO:0005730,GO:0007049,GO:0008150,GO:0009987,GO:0010564,GO:0022414,GO:0031974,GO:0031981,GO:0033043,GO:0033044,GO:0040020,GO:0043226,GO:0043227,GO:0043228,GO:0043229,GO:0043231,GO:0043232,GO:0043233,GO:0044087,GO:0044422,GO:0044424,GO:0044428,GO:0044446,GO:0044464,GO:0050789,GO:0050794,GO:0051128,GO:0051321,GO:0051445,GO:0051726,GO:…	-	-	-	-	-	-	-	-	-	-
Ssa01000279.t2	3847.GLYMA02G00991.2	1.82e-177	536	28ZQC@1|root,2R6IY@2759|Eukaryota,37SNM@33090|Viridiplantae,3GEU5@35493|Streptophyta,4JGBD@91835|fabids	35493|Streptophyta	S	meiotic cell cycle	-	GO:0000003,GO:0005575,GO:0005622,GO:0005623,GO:0005634,GO:0005694,GO:0005730,GO:0007049,GO:0008150,GO:0009987,GO:0010564,GO:0022414,GO:0031974,GO:0031981,GO:0033043,GO:0033044,GO:0040020,GO:0043226,GO:0043227,GO:0043228,GO:0043229,GO:0043231,GO:0043232,GO:0043233,GO:0044087,GO:0044422,GO:0044424,GO:0044428,GO:0044446,GO:0044464,GO:0050789,GO:0050794,GO:0051128,GO:0051321,GO:0051445,GO:0051726,GO:…	-	-	-	-	-	-	-	-	-	-
Ssa01000280.t1	3827.XP_004495854.1	0	891	COG1232@1|root,KOG1276@2759|Eukaryota,37RS1@33090|Viridiplantae,3GC7X@35493|Streptophyta,4JHJQ@91835|fabids	35493|Streptophyta	H	Catalyzes the 6-electron oxidation of protoporphyrinogen-IX to form protoporphyrin-IX	-	GO:0003674,GO:0003824,GO:0004729,GO:0005575,GO:0005622,GO:0005623,GO:0005737,GO:0006725,GO:0006778,GO:0006779,GO:0006807,GO:0008150,GO:0008152,GO:0009058,GO:0009507,GO:0009526,GO:0009534,GO:0009536,GO:0009579,GO:0009941,GO:0009987,GO:0016491,GO:0016627,GO:0016634,GO:0018130,GO:0019438,GO:0031967,GO:0031975,GO:0031976,GO:0031984,GO:0033013,GO:0033014,GO:0034641,GO:0043226,GO:0043227,GO:0043229,GO:…	1.3.3.15,1.3.3.4	ko:K00231	ko00860,ko01100,ko01110,map00860,map01100,map01110	M00121	R03222,R04178	RC00885	ko00000,ko00001,ko00002,ko01000	-	-	Amino_oxidase
Ssa01000281.t1	3847.GLYMA10G27881.1	5.68e-86	257	28JYJ@1|root,2S04C@2759|Eukaryota,37UKE@33090|Viridiplantae,3GITH@35493|Streptophyta,4JTV4@91835|fabids	35493|Streptophyta	K	Aux IAA proteins are short-lived transcriptional factors that function as repressors of early auxin response genes at low auxin concentrations	IAA20	GO:0000003,GO:0003002,GO:0003006,GO:0003674,GO:0003700,GO:0005575,GO:0005622,GO:0005623,GO:0005634,GO:0006355,GO:0007275,GO:0007389,GO:0008150,GO:0009314,GO:0009416,GO:0009605,GO:0009606,GO:0009628,GO:0009629,GO:0009630,GO:0009642,GO:0009646,GO:0009647,GO:0009653,GO:0009719,GO:0009725,GO:0009733,GO:0009790,GO:0009791,GO:0009793,GO:0009889,GO:0009965,GO:0010016,GO:0010033,GO:0010051,GO:0010154,GO:…	-	ko:K14484	ko04075,map04075	-	-	-	ko00000,ko00001	-	-	AUX_IAA
Ssa01000282.t1	3847.GLYMA02G01020.1	2.79e-160	454	COG3979@1|root,KOG4742@2759|Eukaryota,37NF6@33090|Viridiplantae,3GDKX@35493|Streptophyta,4JRU5@91835|fabids	35493|Streptophyta	S	chitinase	-	-	-	-	-	-	-	-	-	-	-	Glyco_hydro_19
Ssa01000283.t2	3847.GLYMA03G38360.1	2.32e-128	390	28KH1@1|root,2QSY8@2759|Eukaryota,37P2H@33090|Viridiplantae,3GC2E@35493|Streptophyta,4JETX@91835|fabids	35493|Streptophyta	K	WRKY transcription factor	WRKY47	GO:0003674,GO:0003700,GO:0006355,GO:0008150,GO:0009889,GO:0010468,GO:0010556,GO:0019219,GO:0019222,GO:0031323,GO:0031326,GO:0050789,GO:0050794,GO:0051171,GO:0051252,GO:0060255,GO:0065007,GO:0080090,GO:0140110,GO:1903506,GO:2000112,GO:2001141	-	-	-	-	-	-	-	-	-	WRKY
Ssa01000283.t1	3847.GLYMA03G38360.1	2.17e-128	390	28KH1@1|root,2QSY8@2759|Eukaryota,37P2H@33090|Viridiplantae,3GC2E@35493|Streptophyta,4JETX@91835|fabids	35493|Streptophyta	K	WRKY transcription factor	WRKY47	GO:0003674,GO:0003700,GO:0006355,GO:0008150,GO:0009889,GO:0010468,GO:0010556,GO:0019219,GO:0019222,GO:0031323,GO:0031326,GO:0050789,GO:0050794,GO:0051171,GO:0051252,GO:0060255,GO:0065007,GO:0080090,GO:0140110,GO:1903506,GO:2000112,GO:2001141	-	-	-	-	-	-	-	-	-	WRKY
Ssa01000284.t1	3827.XP_004495856.1	1.92e-253	708	COG5273@1|root,KOG1311@2759|Eukaryota,37MMC@33090|Viridiplantae,3GAFC@35493|Streptophyta,4JIVU@91835|fabids	35493|Streptophyta	S	Belongs to the DHHC palmitoyltransferase family	-	-	2.3.1.225	ko:K20027	-	-	-	-	ko00000,ko01000,ko04131	-	-	DHHC
Ssa01000285.t1	3880.AES82290	1.18e-295	811	COG5434@1|root,2QTPQ@2759|Eukaryota,37IYV@33090|Viridiplantae,3G7N7@35493|Streptophyta,4JJUR@91835|fabids	35493|Streptophyta	G	Glycosyl hydrolases family 28	-	-	-	-	-	-	-	-	-	-	-	Glyco_hydro_28
Ssa01000285.t2	3880.AES82290	1.1e-297	816	COG5434@1|root,2QTPQ@2759|Eukaryota,37IYV@33090|Viridiplantae,3G7N7@35493|Streptophyta,4JJUR@91835|fabids	35493|Streptophyta	G	Glycosyl hydrolases family 28	-	-	-	-	-	-	-	-	-	-	-	Glyco_hydro_28
Ssa01000286.t1	3885.XP_007150292.1	3.48e-81	247	COG1358@1|root,KOG3387@2759|Eukaryota,37UG5@33090|Viridiplantae,3GING@35493|Streptophyta,4JQ2U@91835|fabids	35493|Streptophyta	AJ	Ribosomal protein L7Ae/L30e/S12e/Gadd45 family	-	-	-	-	-	-	-	-	-	-	-	Ribosomal_L7Ae
Ssa01000287.t1	2711.XP_006492424.1	0	1698	COG0653@1|root,2QS7I@2759|Eukaryota,37NCN@33090|Viridiplantae,3G8SF@35493|Streptophyta	35493|Streptophyta	C	Protein translocase subunit	-	GO:0000166,GO:0003674,GO:0003824,GO:0005215,GO:0005488,GO:0005524,GO:0006810,GO:0008104,GO:0008144,GO:0008150,GO:0008320,GO:0008565,GO:0015031,GO:0015399,GO:0015405,GO:0015440,GO:0015450,GO:0015462,GO:0015833,GO:0016462,GO:0016787,GO:0016817,GO:0016818,GO:0016887,GO:0017076,GO:0017111,GO:0022804,GO:0022857,GO:0022884,GO:0030554,GO:0032553,GO:0032555,GO:0032559,GO:0033036,GO:0033220,GO:0035639,GO:…	-	ko:K03070	ko02024,ko03060,ko03070,map02024,map03060,map03070	M00335	-	-	ko00000,ko00001,ko00002,ko02044	3.A.5.1,3.A.5.10,3.A.5.2,3.A.5.4	-	SecA_DEAD,SecA_PP_bind,SecA_SW
Ssa01000288.t1	3885.XP_007163247.1	0	965	COG0442@1|root,KOG4163@2759|Eukaryota,37NEU@33090|Viridiplantae,3GCNW@35493|Streptophyta,4JEW9@91835|fabids	35493|Streptophyta	J	proline--tRNA ligase	-	GO:0003674,GO:0003824,GO:0004812,GO:0004827,GO:0005575,GO:0005622,GO:0005623,GO:0005737,GO:0005829,GO:0005911,GO:0006082,GO:0006139,GO:0006399,GO:0006412,GO:0006418,GO:0006433,GO:0006518,GO:0006520,GO:0006725,GO:0006807,GO:0008150,GO:0008152,GO:0009058,GO:0009059,GO:0009506,GO:0009987,GO:0010467,GO:0016020,GO:0016070,GO:0016874,GO:0016875,GO:0017101,GO:0019538,GO:0019752,GO:0030054,GO:0032991,GO:…	6.1.1.15	ko:K01881	ko00970,map00970	M00359,M00360	R03661	RC00055,RC00523	ko00000,ko00001,ko00002,ko01000,ko01007,ko03016	-	-	HGTP_anticodon,ProRS-C_1,tRNA-synt_2b
Ssa01000289.t1	3847.GLYMA19G40920.2	0	1434	COG5047@1|root,KOG1986@2759|Eukaryota,37NTS@33090|Viridiplantae,3GEAK@35493|Streptophyta,4JM1H@91835|fabids	35493|Streptophyta	U	transport protein	-	-	-	-	-	-	-	-	-	-	-	Gelsolin,Sec23_BS,Sec23_helical,Sec23_trunk,zf-Sec23_Sec24
Ssa01000289.t2	3847.GLYMA19G40920.2	0	1499	COG5047@1|root,KOG1986@2759|Eukaryota,37NTS@33090|Viridiplantae,3GEAK@35493|Streptophyta,4JM1H@91835|fabids	35493|Streptophyta	U	transport protein	-	-	-	-	-	-	-	-	-	-	-	Gelsolin,Sec23_BS,Sec23_helical,Sec23_trunk,zf-Sec23_Sec24
Ssa01000290.t1	3847.GLYMA10G27800.1	1.03e-252	702	COG1104@1|root,KOG1549@2759|Eukaryota,37Q8I@33090|Viridiplantae,3G98M@35493|Streptophyta,4JTRQ@91835|fabids	35493|Streptophyta	E	Aminotransferase class-V	-	GO:0000096,GO:0000098,GO:0003674,GO:0003824,GO:0005575,GO:0005622,GO:0005623,GO:0005737,GO:0005829,GO:0006082,GO:0006090,GO:0006520,GO:0006534,GO:0006790,GO:0006807,GO:0008150,GO:0008152,GO:0009056,GO:0009063,GO:0009069,GO:0009071,GO:0009093,GO:0009987,GO:0016054,GO:0016829,GO:0016846,GO:0019448,GO:0019450,GO:0019752,GO:0032787,GO:0043436,GO:0044237,GO:0044238,GO:0044248,GO:0044273,GO:0044281,GO:…	4.4.1.28	ko:K22207	ko00270,map00270	-	R00782	RC00382	ko00000,ko00001,ko01000	-	-	Aminotran_5
Ssa01000291.t1	3847.GLYMA02G01100.1	0	1966	COG1132@1|root,KOG0055@2759|Eukaryota,37HZ5@33090|Viridiplantae,3G9FQ@35493|Streptophyta,4JKXQ@91835|fabids	35493|Streptophyta	Q	ABC transporter B family member	-	GO:0003674,GO:0005215,GO:0005575,GO:0005623,GO:0005886,GO:0005911,GO:0006810,GO:0008150,GO:0009506,GO:0009914,GO:0009926,GO:0009966,GO:0010315,GO:0010329,GO:0010540,GO:0010646,GO:0010817,GO:0010928,GO:0015562,GO:0016020,GO:0022857,GO:0023051,GO:0030054,GO:0044464,GO:0048583,GO:0050789,GO:0050794,GO:0051179,GO:0051234,GO:0055044,GO:0055085,GO:0060918,GO:0065007,GO:0065008,GO:0071944,GO:0080161	3.6.3.44	ko:K05658	ko02010,ko04976,ko05206,ko05226,map02010,map04976,map05206,map05226	-	-	-	ko00000,ko00001,ko01000,ko02000,ko04090,ko04147	3.A.1.201	-	ABC_membrane,ABC_tran
Ssa01000292.t1	3885.XP_007163241.1	1.03e-234	654	28N77@1|root,2QQHA@2759|Eukaryota,37NS3@33090|Viridiplantae,3GGS0@35493|Streptophyta,4JEEU@91835|fabids	35493|Streptophyta	H	Transferase family	-	GO:0003674,GO:0003824,GO:0016410,GO:0016740,GO:0016746,GO:0016747	2.3.1.249	ko:K20240	-	-	-	-	ko00000,ko01000	-	-	Transferase
Ssa01000293.t1	3827.XP_004494469.1	7.57e-190	538	KOG1418@1|root,KOG1418@2759|Eukaryota,37MPJ@33090|Viridiplantae,3GAWY@35493|Streptophyta,4JGVT@91835|fabids	35493|Streptophyta	P	Potassium channel	-	GO:0000325,GO:0003674,GO:0005215,GO:0005216,GO:0005261,GO:0005267,GO:0005575,GO:0005622,GO:0005623,GO:0005737,GO:0005773,GO:0005774,GO:0005886,GO:0005887,GO:0006810,GO:0006811,GO:0006812,GO:0006813,GO:0008150,GO:0008324,GO:0009705,GO:0009987,GO:0015075,GO:0015077,GO:0015079,GO:0015267,GO:0015318,GO:0015672,GO:0016020,GO:0016021,GO:0022803,GO:0022838,GO:0022840,GO:0022841,GO:0022842,GO:0022857,GO:…	-	ko:K05389	-	-	-	-	ko00000,ko04040	1.A.1.7	-	Ion_trans_2
Ssa01000294.t1	3880.AES61568	1.4e-211	606	COG4677@1|root,2QQVX@2759|Eukaryota,37R9E@33090|Viridiplantae,3GCYA@35493|Streptophyta,4JNEK@91835|fabids	35493|Streptophyta	G	Pectinesterase	-	GO:0003674,GO:0003824,GO:0004857,GO:0005575,GO:0005623,GO:0008150,GO:0016787,GO:0016788,GO:0030234,GO:0030599,GO:0043086,GO:0044092,GO:0044464,GO:0046910,GO:0050790,GO:0052689,GO:0065007,GO:0065009,GO:0071944,GO:0098772	3.1.1.11	ko:K01051	ko00040,ko01100,map00040,map01100	M00081	R02362	RC00460,RC00461	ko00000,ko00001,ko00002,ko01000	-	-	PMEI,Pectinesterase
Ssa01000295.t1	3880.AES82261	1.4e-75	227	COG0484@1|root,KOG0714@2759|Eukaryota,37VF4@33090|Viridiplantae,3GJGI@35493|Streptophyta,4JQH2@91835|fabids	35493|Streptophyta	O	DnaJ molecular chaperone homology domain	-	-	-	-	-	-	-	-	-	-	-	DnaJ
Ssa01000296.t1	3760.EMJ22748	9.01e-224	644	28Q01@1|root,2QWNR@2759|Eukaryota,37S5Z@33090|Viridiplantae,3G8RF@35493|Streptophyta,4JMB2@91835|fabids	35493|Streptophyta	S	NYN domain	-	-	-	-	-	-	-	-	-	-	-	NYN,OHA
Ssa01000298.t1	3847.GLYMA02G01160.1	0	1534	2CMVE@1|root,2QS71@2759|Eukaryota,37P05@33090|Viridiplantae,3G961@35493|Streptophyta,4JFBY@91835|fabids	35493|Streptophyta	S	Squamosa promoter-binding-like protein	SPL1	GO:0003674,GO:0003700,GO:0006355,GO:0008150,GO:0009889,GO:0010468,GO:0010556,GO:0019219,GO:0019222,GO:0031323,GO:0031326,GO:0050789,GO:0050794,GO:0051171,GO:0051252,GO:0060255,GO:0065007,GO:0080090,GO:0140110,GO:1903506,GO:2000112,GO:2001141	-	-	-	-	-	-	-	-	-	SBP
Ssa01000298.t2	3847.GLYMA02G01160.1	0	1585	2CMVE@1|root,2QS71@2759|Eukaryota,37P05@33090|Viridiplantae,3G961@35493|Streptophyta,4JFBY@91835|fabids	35493|Streptophyta	S	Squamosa promoter-binding-like protein	SPL1	GO:0003674,GO:0003700,GO:0006355,GO:0008150,GO:0009889,GO:0010468,GO:0010556,GO:0019219,GO:0019222,GO:0031323,GO:0031326,GO:0050789,GO:0050794,GO:0051171,GO:0051252,GO:0060255,GO:0065007,GO:0080090,GO:0140110,GO:1903506,GO:2000112,GO:2001141	-	-	-	-	-	-	-	-	-	SBP
Ssa01000299.t1	3847.GLYMA19G40810.1	1.46e-283	775	COG0192@1|root,KOG1506@2759|Eukaryota,37J2J@33090|Viridiplantae,3GE15@35493|Streptophyta,4JS8C@91835|fabids	35493|Streptophyta	H	Catalyzes the formation of S-adenosylmethionine from methionine and ATP	-	GO:0003674,GO:0003824,GO:0004478,GO:0005575,GO:0005622,GO:0005623,GO:0005737,GO:0005829,GO:0016740,GO:0016765,GO:0044424,GO:0044444,GO:0044464	2.5.1.6	ko:K00789	ko00270,ko01100,ko01110,ko01230,map00270,map01100,map01110,map01230	M00034,M00035,M00368,M00609	R00177,R04771	RC00021,RC01211	ko00000,ko00001,ko00002,ko01000	-	-	S-AdoMet_synt_C,S-AdoMet_synt_M,S-AdoMet_synt_N
Ssa01000300.t1	3847.GLYMA19G40790.2	0	1142	COG5236@1|root,KOG2231@2759|Eukaryota,37JKI@33090|Viridiplantae,3GBN7@35493|Streptophyta,4JEFM@91835|fabids	35493|Streptophyta	O	zinc finger	-	-	2.3.2.27	ko:K22381	-	-	-	-	ko00000,ko01000,ko04121	-	-	-
Ssa01000302.t1	3641.EOX95397	0	931	COG0823@1|root,2QPTW@2759|Eukaryota,37K0C@33090|Viridiplantae,3GE93@35493|Streptophyta	35493|Streptophyta	U	WD40-like Beta Propeller Repeat	-	-	-	-	-	-	-	-	-	-	-	DPPIV_N,PD40
Ssa01000302.t2	3641.EOX95397	0	933	COG0823@1|root,2QPTW@2759|Eukaryota,37K0C@33090|Viridiplantae,3GE93@35493|Streptophyta	35493|Streptophyta	U	WD40-like Beta Propeller Repeat	-	-	-	-	-	-	-	-	-	-	-	DPPIV_N,PD40
Ssa01000303.t1	3827.XP_004514365.1	1.55e-57	203	COG2801@1|root,KOG0017@2759|Eukaryota,37RRH@33090|Viridiplantae,3G8MV@35493|Streptophyta,4JM10@91835|fabids	35493|Streptophyta	H	transposition, RNA-mediated	-	-	-	-	-	-	-	-	-	-	-	RVP_2,RVT_1,Retrotrans_gag,rve
Ssa01000304.t1	3641.EOX95390	4.81e-159	455	2CMDP@1|root,2QQ21@2759|Eukaryota,37MM1@33090|Viridiplantae,3G91V@35493|Streptophyta	35493|Streptophyta	-	-	-	-	-	-	-	-	-	-	-	-	-	-
Ssa01000305.t1	29760.VIT_07s0005g02180.t01	2.4e-119	358	COG1028@1|root,KOG0725@2759|Eukaryota,37M2C@33090|Viridiplantae,3G9C2@35493|Streptophyta	35493|Streptophyta	Q	short-chain dehydrogenase reductase	-	-	-	-	-	-	-	-	-	-	-	adh_short,adh_short_C2
Ssa01000306.t1	29760.VIT_07s0005g02180.t01	2.96e-123	368	COG1028@1|root,KOG0725@2759|Eukaryota,37M2C@33090|Viridiplantae,3G9C2@35493|Streptophyta	35493|Streptophyta	Q	short-chain dehydrogenase reductase	-	-	-	-	-	-	-	-	-	-	-	adh_short,adh_short_C2
Ssa01000307.t1	3641.EOX95389	4.02e-122	356	COG1028@1|root,KOG0725@2759|Eukaryota,37M2C@33090|Viridiplantae,3G9C2@35493|Streptophyta	35493|Streptophyta	Q	short-chain dehydrogenase reductase	-	-	-	-	-	-	-	-	-	-	-	adh_short,adh_short_C2
Ssa01000308.t1	3641.EOX95387	1.39e-76	235	COG5637@1|root,2QSDH@2759|Eukaryota,37JUU@33090|Viridiplantae,3GGIN@35493|Streptophyta	35493|Streptophyta	S	BEST Arabidopsis thaliana protein match is	-	-	-	-	-	-	-	-	-	-	-	Polyketide_cyc
Ssa01000309.t1	3641.EOX95386	4.97e-202	568	COG0631@1|root,KOG0698@2759|Eukaryota,37IIT@33090|Viridiplantae,3GFWF@35493|Streptophyta	35493|Streptophyta	T	phosphatase 2C	-	-	3.1.3.16	ko:K14803	-	-	-	-	ko00000,ko01000,ko01009,ko03009	-	-	PP2C
Ssa01000311.t1	3847.GLYMA02G01220.2	2.87e-287	785	COG0515@1|root,KOG0658@2759|Eukaryota,37IWS@33090|Viridiplantae,3G7U0@35493|Streptophyta,4JIJF@91835|fabids	35493|Streptophyta	T	Glycogen synthase kinase-3 homolog	-	-	2.7.11.26	ko:K03083	ko01521,ko04012,ko04062,ko04110,ko04150,ko04151,ko04310,ko04340,ko04341,ko04360,ko04390,ko04510,ko04550,ko04657,ko04660,ko04662,ko04711,ko04722,ko04728,ko04910,ko04916,ko04917,ko04919,ko04931,ko04932,ko04934,ko05010,ko05160,ko05162,ko05164,ko05165,ko05166,ko05167,ko05169,ko05200,ko05210,ko05213,ko05215,ko05217,ko05224,ko05225,ko05226,map01521,map04012,map04062,map04110,map04150,map04151,map04310,…	M00677	-	-	ko00000,ko00001,ko00002,ko01000,ko01001,ko03036	-	-	Pkinase
Ssa01000312.t1	3847.GLYMA02G01230.1	1.62e-255	709	COG5434@1|root,2QPYK@2759|Eukaryota,37KKW@33090|Viridiplantae,3GCSI@35493|Streptophyta,4JI30@91835|fabids	35493|Streptophyta	G	Polygalacturonase	-	GO:0003674,GO:0003824,GO:0004553,GO:0004650,GO:0005575,GO:0005618,GO:0005623,GO:0008150,GO:0009664,GO:0009825,GO:0009827,GO:0009831,GO:0009987,GO:0016043,GO:0016049,GO:0016787,GO:0016798,GO:0030312,GO:0040007,GO:0042545,GO:0042547,GO:0044464,GO:0045229,GO:0071554,GO:0071555,GO:0071669,GO:0071840,GO:0071944	3.2.1.67	ko:K01213	ko00040,ko01100,map00040,map01100	M00081	R01982,R07413	RC00049	ko00000,ko00001,ko00002,ko01000	-	-	Glyco_hydro_28,Pectate_lyase_3
Ssa01000313.t1	3641.EOX95381	1.79e-11	63.9	2D0HY@1|root,2SE98@2759|Eukaryota,37XPK@33090|Viridiplantae,3GM82@35493|Streptophyta	35493|Streptophyta	S	NPR1 interacting	-	-	-	-	-	-	-	-	-	-	-	NPR1_interact
Ssa01000314.t1	102107.XP_008227809.1	1.35e-77	237	COG0347@1|root,2RUKA@2759|Eukaryota,37T8G@33090|Viridiplantae,3GHWY@35493|Streptophyta,4JRS8@91835|fabids	35493|Streptophyta	K	Nitrogen regulatory protein P-II homolog	GLB1	GO:0000166,GO:0000287,GO:0000820,GO:0000821,GO:0003674,GO:0005488,GO:0005524,GO:0005575,GO:0005622,GO:0005623,GO:0005737,GO:0005829,GO:0006521,GO:0006807,GO:0008144,GO:0008150,GO:0008152,GO:0009058,GO:0009314,GO:0009416,GO:0009507,GO:0009534,GO:0009536,GO:0009579,GO:0009628,GO:0009718,GO:0009743,GO:0009744,GO:0009812,GO:0009813,GO:0009889,GO:0010033,GO:0010307,GO:0010565,GO:0017076,GO:0019207,GO:…	-	-	-	-	-	-	-	-	-	P-II
Ssa01000314.t2	102107.XP_008227809.1	1.64e-77	237	COG0347@1|root,2RUKA@2759|Eukaryota,37T8G@33090|Viridiplantae,3GHWY@35493|Streptophyta,4JRS8@91835|fabids	35493|Streptophyta	K	Nitrogen regulatory protein P-II homolog	GLB1	GO:0000166,GO:0000287,GO:0000820,GO:0000821,GO:0003674,GO:0005488,GO:0005524,GO:0005575,GO:0005622,GO:0005623,GO:0005737,GO:0005829,GO:0006521,GO:0006807,GO:0008144,GO:0008150,GO:0008152,GO:0009058,GO:0009314,GO:0009416,GO:0009507,GO:0009534,GO:0009536,GO:0009579,GO:0009628,GO:0009718,GO:0009743,GO:0009744,GO:0009812,GO:0009813,GO:0009889,GO:0010033,GO:0010307,GO:0010565,GO:0017076,GO:0019207,GO:…	-	-	-	-	-	-	-	-	-	P-II
Ssa01000315.t1	3827.XP_004495883.1	1.2e-145	433	KOG4197@1|root,KOG4197@2759|Eukaryota,37HVG@33090|Viridiplantae,3G96K@35493|Streptophyta,4JMV8@91835|fabids	35493|Streptophyta	S	Pentatricopeptide repeat-containing protein	-	GO:0003674,GO:0003676,GO:0003723,GO:0003824,GO:0004518,GO:0004519,GO:0005488,GO:0005575,GO:0005622,GO:0005623,GO:0006139,GO:0006725,GO:0006807,GO:0008150,GO:0008152,GO:0009451,GO:0009987,GO:0016070,GO:0016787,GO:0016788,GO:0034641,GO:0043170,GO:0043226,GO:0043227,GO:0043229,GO:0043231,GO:0043412,GO:0044237,GO:0044238,GO:0044424,GO:0044464,GO:0046483,GO:0071704,GO:0090304,GO:0090305,GO:0097159,GO:…	-	-	-	-	-	-	-	-	-	PPR,PPR_2,PPR_3
Ssa01000316.t1	3983.cassava4.1_011421m	2.23e-215	597	COG5597@1|root,KOG1950@2759|Eukaryota,37MMR@33090|Viridiplantae,3GBQV@35493|Streptophyta,4JGXV@91835|fabids	35493|Streptophyta	G	Belongs to the glycosyltransferase 8 family	GolS1	GO:0000271,GO:0000302,GO:0001101,GO:0003674,GO:0003824,GO:0005575,GO:0005622,GO:0005623,GO:0005737,GO:0005829,GO:0005975,GO:0005976,GO:0005977,GO:0005978,GO:0005996,GO:0006012,GO:0006073,GO:0006091,GO:0006112,GO:0006950,GO:0006970,GO:0006979,GO:0008150,GO:0008152,GO:0008194,GO:0008378,GO:0008466,GO:0009058,GO:0009059,GO:0009250,GO:0009266,GO:0009314,GO:0009408,GO:0009409,GO:0009414,GO:0009415,GO:…	2.4.1.123	ko:K18819	ko00052,map00052	-	R01192	RC00005,RC00049,RC02748	ko00000,ko00001,ko01000	-	GT8	Glyco_transf_8
Ssa01000317.t1	2711.XP_006492457.1	7.16e-94	283	COG5147@1|root,KOG0048@2759|Eukaryota,37Q2N@33090|Viridiplantae,3GFUJ@35493|Streptophyta	35493|Streptophyta	K	transcription factor	-	-	-	ko:K09422	-	-	-	-	ko00000,ko03000	-	-	Myb_DNA-binding
Ssa01000319.t1	3847.GLYMA10G01380.1	1.49e-170	485	COG3491@1|root,KOG0143@2759|Eukaryota,37R49@33090|Viridiplantae,3G77N@35493|Streptophyta,4JIAU@91835|fabids	35493|Streptophyta	Q	Belongs to the iron ascorbate-dependent oxidoreductase family	-	GO:0003674,GO:0003824,GO:0006082,GO:0006629,GO:0006720,GO:0006721,GO:0008150,GO:0008152,GO:0008300,GO:0009056,GO:0009314,GO:0009416,GO:0009628,GO:0009639,GO:0009685,GO:0009987,GO:0010817,GO:0016042,GO:0016054,GO:0016101,GO:0016103,GO:0016115,GO:0016491,GO:0016705,GO:0016706,GO:0019752,GO:0042445,GO:0042447,GO:0043436,GO:0044237,GO:0044238,GO:0044242,GO:0044248,GO:0044255,GO:0044281,GO:0044282,GO:…	1.14.11.13	ko:K04125	ko00904,ko01110,map00904,map01110	-	R03008,R03809,R06337,R06338	RC00478,RC00661	ko00000,ko00001,ko01000	-	-	2OG-FeII_Oxy,DIOX_N
Ssa01000320.t1	3847.GLYMA03G38000.1	0	1159	COG1022@1|root,KOG1256@2759|Eukaryota,37IYG@33090|Viridiplantae,3GA0T@35493|Streptophyta,4JKJJ@91835|fabids	35493|Streptophyta	I	Long chain acyl-CoA synthetase	-	GO:0001676,GO:0003674,GO:0003824,GO:0004467,GO:0005575,GO:0005622,GO:0005623,GO:0005737,GO:0005783,GO:0006082,GO:0006629,GO:0006631,GO:0008150,GO:0008152,GO:0009058,GO:0009059,GO:0009987,GO:0010025,GO:0010143,GO:0010166,GO:0012505,GO:0015645,GO:0016405,GO:0016874,GO:0016877,GO:0016878,GO:0019752,GO:0031957,GO:0032787,GO:0043170,GO:0043226,GO:0043227,GO:0043229,GO:0043231,GO:0043436,GO:0044237,GO:…	6.2.1.3	ko:K01897	ko00061,ko00071,ko01100,ko01212,ko02024,ko03320,ko04146,ko04216,ko04714,ko04920,map00061,map00071,map01100,map01212,map02024,map03320,map04146,map04216,map04714,map04920	M00086	R01280	RC00004,RC00014	ko00000,ko00001,ko00002,ko01000,ko01004,ko04147	4.C.1.1	-	AMP-binding,AMP-binding_C
Ssa01000321.t1	3827.XP_004495891.1	1.84e-252	708	2CMR8@1|root,2QRJ7@2759|Eukaryota,37IDF@33090|Viridiplantae,3G8DA@35493|Streptophyta,4JM3A@91835|fabids	35493|Streptophyta	I	glycerol-3-phosphate acyltransferase	-	GO:0003674,GO:0003824,GO:0005575,GO:0006793,GO:0006796,GO:0008150,GO:0008152,GO:0008374,GO:0009058,GO:0009059,GO:0009987,GO:0010143,GO:0016020,GO:0016311,GO:0016740,GO:0016746,GO:0016747,GO:0016787,GO:0016788,GO:0016791,GO:0042578,GO:0043170,GO:0044237,GO:0071704,GO:0090447,GO:1901576	2.3.1.15,2.3.1.198	ko:K13508	ko00561,ko00564,ko01100,ko01110,map00561,map00564,map01100,map01110	M00089	R00851,R06872,R09380	RC00004,RC00037,RC00039,RC00041	ko00000,ko00001,ko00002,ko01000,ko01004	-	-	Acyltransferase
Ssa01000322.t1	3847.GLYMA02G01410.1	1.5e-26	109	2C6RE@1|root,2S30Q@2759|Eukaryota,37V9B@33090|Viridiplantae,3GIGW@35493|Streptophyta,4JQES@91835|fabids	35493|Streptophyta	-	-	-	-	-	-	-	-	-	-	-	-	-	-
Ssa01000323.t1	3885.XP_007163199.1	2.49e-258	717	29868@1|root,2RF6R@2759|Eukaryota,37QFW@33090|Viridiplantae,3GGVA@35493|Streptophyta,4JFQE@91835|fabids	35493|Streptophyta	S	zinc finger	-	-	-	-	-	-	-	-	-	-	-	-
Ssa01000323.t2	3885.XP_007163199.1	1.79e-255	709	29868@1|root,2RF6R@2759|Eukaryota,37QFW@33090|Viridiplantae,3GGVA@35493|Streptophyta,4JFQE@91835|fabids	35493|Streptophyta	S	zinc finger	-	-	-	-	-	-	-	-	-	-	-	-
Ssa01000324.t1	225117.XP_009363136.1	8.02e-211	627	KOG4197@1|root,KOG4197@2759|Eukaryota,37HN8@33090|Viridiplantae,3GG0D@35493|Streptophyta,4JGW0@91835|fabids	35493|Streptophyta	S	Pentatricopeptide repeat-containing protein	-	GO:0003674,GO:0003676,GO:0003677,GO:0003723,GO:0003824,GO:0004518,GO:0004519,GO:0005488,GO:0005575,GO:0005622,GO:0005623,GO:0005737,GO:0006139,GO:0006725,GO:0006807,GO:0007154,GO:0007165,GO:0008150,GO:0008152,GO:0009451,GO:0009507,GO:0009536,GO:0009987,GO:0010019,GO:0016070,GO:0016787,GO:0016788,GO:0023052,GO:0031930,GO:0034641,GO:0043170,GO:0043226,GO:0043227,GO:0043229,GO:0043231,GO:0043412,GO:…	-	-	-	-	-	-	-	-	-	PPR,PPR_1,PPR_2,PPR_3,Smr
Ssa01000325.t1	3885.XP_007145134.1	5.56e-119	352	28JIG@1|root,2QU0Y@2759|Eukaryota,37KMQ@33090|Viridiplantae,3G9WY@35493|Streptophyta,4JDVX@91835|fabids	35493|Streptophyta	K	WRKY transcription factor	WRKY23	GO:0003674,GO:0003700,GO:0006355,GO:0008150,GO:0009605,GO:0009607,GO:0009624,GO:0009719,GO:0009725,GO:0009733,GO:0009889,GO:0010033,GO:0010468,GO:0010556,GO:0019219,GO:0019222,GO:0031323,GO:0031326,GO:0042221,GO:0043207,GO:0050789,GO:0050794,GO:0050896,GO:0051171,GO:0051252,GO:0051704,GO:0051707,GO:0060255,GO:0065007,GO:0080090,GO:0140110,GO:1903506,GO:2000112,GO:2001141	-	-	-	-	-	-	-	-	-	WRKY
Ssa01000326.t1	3827.XP_004496369.1	1e-26	103	2CYN8@1|root,2S5A4@2759|Eukaryota,37WJN@33090|Viridiplantae,3GKR4@35493|Streptophyta,4JR59@91835|fabids	35493|Streptophyta	S	transcription factor	-	GO:0003674,GO:0003700,GO:0006355,GO:0008150,GO:0009889,GO:0010468,GO:0010556,GO:0019219,GO:0019222,GO:0031323,GO:0031326,GO:0050789,GO:0050793,GO:0050794,GO:0051171,GO:0051239,GO:0051252,GO:0060255,GO:0065007,GO:0080090,GO:0140110,GO:1903506,GO:2000026,GO:2000112,GO:2000280,GO:2001141	-	-	-	-	-	-	-	-	-	-
Ssa01000329.t1	3847.GLYMA19G40550.1	0	1375	2CC3R@1|root,2QTKB@2759|Eukaryota,37JEJ@33090|Viridiplantae,3G794@35493|Streptophyta,4JGC0@91835|fabids	35493|Streptophyta	S	Stachyose	STS	GO:0003674,GO:0003824,GO:0006950,GO:0006979,GO:0008150,GO:0008378,GO:0009628,GO:0016740,GO:0016757,GO:0016758,GO:0047268,GO:0050896,GO:0080167	2.4.1.67	ko:K06611	ko00052,map00052	-	R03418	RC00049,RC00059	ko00000,ko00001,ko01000	-	-	Raffinose_syn
Ssa01000331.t1	3847.GLYMA19G40510.1	0	1204	COG0513@1|root,KOG0339@2759|Eukaryota,37R3K@33090|Viridiplantae,3G7VP@35493|Streptophyta,4JCZW@91835|fabids	35493|Streptophyta	A	Belongs to the DEAD box helicase family	-	GO:0003674,GO:0003724,GO:0003824,GO:0004004,GO:0004386,GO:0005575,GO:0005622,GO:0005623,GO:0005634,GO:0005730,GO:0005737,GO:0006139,GO:0006725,GO:0006807,GO:0008026,GO:0008150,GO:0008152,GO:0008186,GO:0009987,GO:0010501,GO:0016070,GO:0016462,GO:0016787,GO:0016817,GO:0016818,GO:0016887,GO:0017111,GO:0031974,GO:0031981,GO:0034641,GO:0042623,GO:0043170,GO:0043226,GO:0043227,GO:0043228,GO:0043229,GO:…	3.6.4.13	ko:K12835	ko03040,map03040	M00352	-	-	ko00000,ko00001,ko00002,ko01000,ko03041	-	-	DEAD,Helicase_C
Ssa01000332.t1	3827.XP_004486400.1	2.63e-25	105	2E207@1|root,2S99C@2759|Eukaryota,37WRK@33090|Viridiplantae,3GKWN@35493|Streptophyta,4JV1T@91835|fabids	35493|Streptophyta	S	Plant invertase/pectin methylesterase inhibitor	-	-	-	-	-	-	-	-	-	-	-	PMEI
Ssa01000333.t1	3847.GLYMA19G40470.1	9.95e-96	288	28PFA@1|root,2R27Y@2759|Eukaryota,37TNP@33090|Viridiplantae,3GFNI@35493|Streptophyta,4JNXU@91835|fabids	35493|Streptophyta	K	WRKY transcription factor	-	GO:0000003,GO:0003006,GO:0003674,GO:0003700,GO:0006355,GO:0007275,GO:0008150,GO:0009555,GO:0009790,GO:0009791,GO:0009793,GO:0009889,GO:0010154,GO:0010468,GO:0010556,GO:0019219,GO:0019222,GO:0022414,GO:0031323,GO:0031326,GO:0032501,GO:0032502,GO:0048229,GO:0048316,GO:0048608,GO:0048731,GO:0048856,GO:0050789,GO:0050794,GO:0051171,GO:0051252,GO:0060255,GO:0061458,GO:0065007,GO:0080090,GO:0140110,GO:…	-	-	-	-	-	-	-	-	-	WRKY
Ssa01000334.t1	3847.GLYMA10G01560.1	3.6e-97	293	29AV9@1|root,2RHY4@2759|Eukaryota,37SF6@33090|Viridiplantae,3GEJJ@35493|Streptophyta,4JEM8@91835|fabids	35493|Streptophyta	-	-	-	-	-	-	-	-	-	-	-	-	-	-
Ssa01000335.t2	3847.GLYMA19G40440.2	5.76e-230	653	28K9J@1|root,2QQYY@2759|Eukaryota,37JRT@33090|Viridiplantae,3GEV3@35493|Streptophyta,4JDXW@91835|fabids	35493|Streptophyta	K	Belongs to the GRAS family	-	-	-	ko:K14494	ko04075,map04075	-	-	-	ko00000,ko00001	-	-	GRAS
Ssa01000335.t1	3847.GLYMA19G40440.2	4.7e-189	542	28K9J@1|root,2QQYY@2759|Eukaryota,37JRT@33090|Viridiplantae,3GEV3@35493|Streptophyta,4JDXW@91835|fabids	35493|Streptophyta	K	Belongs to the GRAS family	-	-	-	ko:K14494	ko04075,map04075	-	-	-	ko00000,ko00001	-	-	GRAS
Ssa01000336.t1	3847.GLYMA19G40490.1	1.07e-272	763	2CMYS@1|root,2QSTQ@2759|Eukaryota,37PUT@33090|Viridiplantae,3G7SI@35493|Streptophyta,4JKVW@91835|fabids	35493|Streptophyta	S	PAPA-1-like conserved region	-	-	-	ko:K11666	-	-	-	-	ko00000,ko03036	-	-	PAPA-1,zf-HIT
Ssa01000338.t1	3880.AES82189	1.19e-37	126	2E14P@1|root,2S8H1@2759|Eukaryota,37WUZ@33090|Viridiplantae,3GKXQ@35493|Streptophyta,4JR15@91835|fabids	35493|Streptophyta	S	Cytochrome C oxidase, subunit	-	-	-	-	-	-	-	-	-	-	-	-
Ssa01000339.t1	3827.XP_004495904.1	5.92e-55	175	2DAQB@1|root,2S5GB@2759|Eukaryota,37WHF@33090|Viridiplantae,3GKHB@35493|Streptophyta,4JPXK@91835|fabids	35493|Streptophyta	S	Calvin cycle protein	CP12-1	GO:0003674,GO:0005488,GO:0005507,GO:0005515,GO:0005575,GO:0005622,GO:0005623,GO:0005737,GO:0005975,GO:0006109,GO:0006464,GO:0006807,GO:0006950,GO:0008150,GO:0008152,GO:0009058,GO:0009266,GO:0009314,GO:0009408,GO:0009409,GO:0009416,GO:0009507,GO:0009526,GO:0009532,GO:0009536,GO:0009570,GO:0009628,GO:0009743,GO:0009744,GO:0009889,GO:0009890,GO:0009892,GO:0009941,GO:0009987,GO:0010033,GO:0010109,GO:…	-	-	-	-	-	-	-	-	-	CP12
Ssa01000340.t1	3847.GLYMA19G40390.1	3.03e-55	177	2CY2E@1|root,2S1GC@2759|Eukaryota,37VIA@33090|Viridiplantae,3GJBC@35493|Streptophyta,4JQCG@91835|fabids	35493|Streptophyta	K	Ocs element-binding factor	-	GO:0003674,GO:0003676,GO:0003677,GO:0003700,GO:0005488,GO:0005515,GO:0005575,GO:0005622,GO:0005623,GO:0005634,GO:0006355,GO:0006950,GO:0006970,GO:0006971,GO:0007154,GO:0008150,GO:0009267,GO:0009605,GO:0009628,GO:0009889,GO:0009891,GO:0009893,GO:0009987,GO:0009991,GO:0010468,GO:0010556,GO:0010557,GO:0010604,GO:0010628,GO:0019219,GO:0019222,GO:0031323,GO:0031325,GO:0031326,GO:0031328,GO:0031667,GO:…	-	-	-	-	-	-	-	-	-	bZIP_1
Ssa01000341.t1	3880.AES61658	0	1164	KOG2346@1|root,KOG2346@2759|Eukaryota,37MP2@33090|Viridiplantae,3GESV@35493|Streptophyta,4JKJN@91835|fabids	35493|Streptophyta	S	Vacuolar protein sorting-associated protein 51 homolog	-	GO:0000938,GO:0003002,GO:0005575,GO:0005622,GO:0005623,GO:0005737,GO:0005768,GO:0005794,GO:0006810,GO:0006914,GO:0007034,GO:0007041,GO:0007275,GO:0007389,GO:0008150,GO:0008152,GO:0009056,GO:0009987,GO:0010051,GO:0010305,GO:0012505,GO:0016192,GO:0016197,GO:0016482,GO:0031410,GO:0031982,GO:0032456,GO:0032501,GO:0032502,GO:0032991,GO:0042147,GO:0043226,GO:0043227,GO:0043229,GO:0043231,GO:0044237,GO:…	-	ko:K20296	-	-	-	-	ko00000,ko04131	-	-	Vps51
Ssa01000342.t1	3885.XP_007163173.1	0	1316	COG1241@1|root,KOG0482@2759|Eukaryota,37P8I@33090|Viridiplantae,3GAJ3@35493|Streptophyta,4JDX2@91835|fabids	35493|Streptophyta	L	Belongs to the MCM family	-	GO:0000347,GO:0005575,GO:0005622,GO:0005623,GO:0005634,GO:0005737,GO:0006139,GO:0006259,GO:0006260,GO:0006261,GO:0006268,GO:0006725,GO:0006807,GO:0006996,GO:0007154,GO:0007165,GO:0008150,GO:0008152,GO:0009058,GO:0009059,GO:0009743,GO:0009756,GO:0009987,GO:0010033,GO:0010182,GO:0016043,GO:0023052,GO:0032392,GO:0032508,GO:0032991,GO:0034641,GO:0034645,GO:0042221,GO:0043170,GO:0043226,GO:0043227,GO:…	3.6.4.12	ko:K02210	ko03030,ko04110,ko04111,ko04113,map03030,map04110,map04111,map04113	M00285	-	-	ko00000,ko00001,ko00002,ko01000,ko01009,ko03032	-	-	MCM,MCM_N,MCM_OB
Ssa01000343.t2	3847.GLYMA02G01620.1	0	2116	COG2319@1|root,KOG0644@2759|Eukaryota,37PIW@33090|Viridiplantae,3GBFC@35493|Streptophyta,4JSCK@91835|fabids	35493|Streptophyta	S	Bromodomain and WD repeat-containing protein	-	GO:0001932,GO:0001934,GO:0003674,GO:0005488,GO:0005515,GO:0005575,GO:0005622,GO:0005623,GO:0005634,GO:0006355,GO:0006357,GO:0006606,GO:0006810,GO:0006886,GO:0006913,GO:0006996,GO:0007010,GO:0007088,GO:0007154,GO:0007165,GO:0007166,GO:0007167,GO:0007169,GO:0007346,GO:0008104,GO:0008150,GO:0008284,GO:0008286,GO:0008360,GO:0009719,GO:0009725,GO:0009889,GO:0009891,GO:0009893,GO:0009966,GO:0009967,GO:…	-	ko:K11797	-	-	-	-	ko00000,ko04121	-	-	Auxin_resp,Bromodomain,WD40
Ssa01000343.t1	3847.GLYMA02G01620.1	0	2114	COG2319@1|root,KOG0644@2759|Eukaryota,37PIW@33090|Viridiplantae,3GBFC@35493|Streptophyta,4JSCK@91835|fabids	35493|Streptophyta	S	Bromodomain and WD repeat-containing protein	-	GO:0001932,GO:0001934,GO:0003674,GO:0005488,GO:0005515,GO:0005575,GO:0005622,GO:0005623,GO:0005634,GO:0006355,GO:0006357,GO:0006606,GO:0006810,GO:0006886,GO:0006913,GO:0006996,GO:0007010,GO:0007088,GO:0007154,GO:0007165,GO:0007166,GO:0007167,GO:0007169,GO:0007346,GO:0008104,GO:0008150,GO:0008284,GO:0008286,GO:0008360,GO:0009719,GO:0009725,GO:0009889,GO:0009891,GO:0009893,GO:0009966,GO:0009967,GO:…	-	ko:K11797	-	-	-	-	ko00000,ko04121	-	-	Auxin_resp,Bromodomain,WD40
Ssa01000344.t1	3847.GLYMA03G37740.1	5.33e-98	291	COG5183@1|root,KOG1609@2759|Eukaryota,37S58@33090|Viridiplantae,3GDNB@35493|Streptophyta,4JP23@91835|fabids	35493|Streptophyta	A	Protein of unknown function (DUF3675)	-	GO:0003674,GO:0003824,GO:0004842,GO:0005575,GO:0005622,GO:0005623,GO:0005737,GO:0005783,GO:0006464,GO:0006807,GO:0008150,GO:0008152,GO:0009987,GO:0012505,GO:0016567,GO:0016740,GO:0019538,GO:0019787,GO:0031410,GO:0031982,GO:0032446,GO:0036211,GO:0043170,GO:0043226,GO:0043227,GO:0043229,GO:0043231,GO:0043412,GO:0044237,GO:0044238,GO:0044260,GO:0044267,GO:0044424,GO:0044444,GO:0044464,GO:0070647,GO:…	-	-	-	-	-	-	-	-	-	DUF3675,RINGv
Ssa01000345.t1	3885.XP_007145154.1	7.27e-71	217	COG0589@1|root,2RYEB@2759|Eukaryota,37UZJ@33090|Viridiplantae,3GJ4T@35493|Streptophyta,4JPTX@91835|fabids	35493|Streptophyta	T	Universal stress protein A-like protein	-	GO:0000166,GO:0003674,GO:0005488,GO:0005575,GO:0005623,GO:0005886,GO:0008144,GO:0016020,GO:0016208,GO:0017076,GO:0030554,GO:0032553,GO:0032555,GO:0032559,GO:0036094,GO:0043167,GO:0043168,GO:0043169,GO:0044464,GO:0071944,GO:0097159,GO:0097367,GO:1901265,GO:1901363	-	-	-	-	-	-	-	-	-	Usp
Ssa01000346.t1	3885.XP_007145155.1	2.11e-69	216	2AW1J@1|root,2S304@2759|Eukaryota,37VMU@33090|Viridiplantae,3GIX1@35493|Streptophyta,4JQ7X@91835|fabids	35493|Streptophyta	S	Multidrug resistance protein ABC transporter family protein	-	-	-	-	-	-	-	-	-	-	-	DUF4228
Ssa01000347.t1	3827.XP_004494414.1	0	1258	COG1472@1|root,2QQ55@2759|Eukaryota,37HXP@33090|Viridiplantae,3G7F4@35493|Streptophyta,4JI1Q@91835|fabids	35493|Streptophyta	G	beta-D-xylosidase	-	GO:0005575,GO:0005618,GO:0005623,GO:0009505,GO:0030312,GO:0044464,GO:0071944	-	-	-	-	-	-	-	-	-	Fn3-like,Glyco_hydro_3,Glyco_hydro_3_C
Ssa01000348.t1	3827.XP_004494413.1	4.49e-277	773	28HKM@1|root,2QPYD@2759|Eukaryota,37QQM@33090|Viridiplantae,3GGX2@35493|Streptophyta,4JEI5@91835|fabids	35493|Streptophyta	O	DnaJ heat shock amino-terminal domain protein	-	-	-	-	-	-	-	-	-	-	-	-
Ssa01000349.t1	981085.XP_010095303.1	2.26e-117	339	KOG2886@1|root,KOG2886@2759|Eukaryota,37JET@33090|Viridiplantae,3GF6U@35493|Streptophyta,4JHJJ@91835|fabids	35493|Streptophyta	S	Transmembrane protein 205	-	-	-	-	-	-	-	-	-	-	-	DUF4149
Ssa01000350.t1	3885.XP_007145162.1	1.38e-254	727	28MKW@1|root,2QU4P@2759|Eukaryota,37NH1@33090|Viridiplantae,3G7YC@35493|Streptophyta,4JIFT@91835|fabids	35493|Streptophyta	T	Lipase (class 3)	-	-	-	-	-	-	-	-	-	-	-	Lipase_3
Ssa01000351.t1	3847.GLYMA10G01780.1	8.67e-75	225	COG5248@1|root,KOG3901@2759|Eukaryota,37UMD@33090|Viridiplantae,3GIJP@35493|Streptophyta,4JPR2@91835|fabids	35493|Streptophyta	K	Transcription initiation factor TFIID subunit	-	GO:0000003,GO:0000428,GO:0003006,GO:0003674,GO:0003676,GO:0003677,GO:0003712,GO:0005488,GO:0005575,GO:0005622,GO:0005623,GO:0005634,GO:0005654,GO:0005667,GO:0005669,GO:0006355,GO:0006357,GO:0007275,GO:0008150,GO:0009790,GO:0009791,GO:0009793,GO:0009888,GO:0009889,GO:0009960,GO:0010154,GO:0010468,GO:0010556,GO:0016591,GO:0019219,GO:0019222,GO:0022414,GO:0030880,GO:0031323,GO:0031326,GO:0031974,GO:…	-	ko:K03127	ko03022,ko05168,map03022,map05168	-	-	-	ko00000,ko00001,ko03021	-	-	TFIID-18kDa
Ssa01000352.t1	2711.XP_006480056.1	3.82e-218	605	COG0484@1|root,KOG0713@2759|Eukaryota,37IG8@33090|Viridiplantae,3G9SD@35493|Streptophyta	35493|Streptophyta	O	DnaJ homolog subfamily B member	-	GO:0002682,GO:0002684,GO:0005575,GO:0005622,GO:0005623,GO:0005737,GO:0005783,GO:0005788,GO:0005886,GO:0008150,GO:0009605,GO:0009607,GO:0012505,GO:0016020,GO:0031347,GO:0031349,GO:0031974,GO:0032991,GO:0034663,GO:0035821,GO:0043207,GO:0043226,GO:0043227,GO:0043229,GO:0043231,GO:0043233,GO:0044003,GO:0044403,GO:0044419,GO:0044422,GO:0044424,GO:0044432,GO:0044444,GO:0044446,GO:0044464,GO:0045088,GO:…	-	ko:K09517	ko04141,map04141	-	-	-	ko00000,ko00001,ko03110	-	-	DnaJ,DnaJ_C
Ssa01000353.t1	3988.XP_002515309.1	3.02e-222	617	COG0526@1|root,KOG0191@2759|Eukaryota,37NZK@33090|Viridiplantae,3GGAI@35493|Streptophyta,4JHDX@91835|fabids	35493|Streptophyta	O	Belongs to the protein disulfide isomerase family	-	GO:0003674,GO:0003756,GO:0003824,GO:0005575,GO:0005622,GO:0005623,GO:0005737,GO:0005783,GO:0006457,GO:0006950,GO:0008150,GO:0009987,GO:0012505,GO:0016853,GO:0016860,GO:0016864,GO:0033554,GO:0034976,GO:0043226,GO:0043227,GO:0043229,GO:0043231,GO:0044424,GO:0044444,GO:0044464,GO:0050896,GO:0051716,GO:0140096	5.3.4.1	ko:K01829,ko:K09584	ko04141,map04141	-	-	-	ko00000,ko00001,ko01000,ko03110,ko04131	-	-	ERp29,Thioredoxin
Ssa01000354.t1	3880.AES61693	3.26e-113	332	28PYR@1|root,2QWMC@2759|Eukaryota,37T55@33090|Viridiplantae,3G7Q5@35493|Streptophyta,4JGZS@91835|fabids	35493|Streptophyta	S	BEST Arabidopsis thaliana protein match is 3'-5' exonuclease domain-containing protein K homology domain-containing protein KH domain-containing protein (TAIR AT2G25910.2)	-	-	-	-	-	-	-	-	-	-	-	-
Ssa01000354.t2	3880.AES61693	6.66e-115	336	28PYR@1|root,2QWMC@2759|Eukaryota,37T55@33090|Viridiplantae,3G7Q5@35493|Streptophyta,4JGZS@91835|fabids	35493|Streptophyta	S	BEST Arabidopsis thaliana protein match is 3'-5' exonuclease domain-containing protein K homology domain-containing protein KH domain-containing protein (TAIR AT2G25910.2)	-	-	-	-	-	-	-	-	-	-	-	-
Ssa01000355.t1	3847.GLYMA02G01791.1	2.76e-28	112	2E1R9@1|root,2S91E@2759|Eukaryota,37WV8@33090|Viridiplantae,3GKI6@35493|Streptophyta,4JR5B@91835|fabids	35493|Streptophyta	S	Cotton fibre expressed protein	-	-	-	-	-	-	-	-	-	-	-	DUF761
Ssa01000356.t1	3847.GLYMA10G01890.2	3.02e-267	741	COG4299@1|root,KOG4683@2759|Eukaryota,37PJ6@33090|Viridiplantae,3GDG2@35493|Streptophyta,4JMZB@91835|fabids	35493|Streptophyta	S	Heparan-alpha-glucosaminide N-acetyltransferase-like	-	-	2.3.1.78	ko:K10532	ko00531,ko01100,ko04142,map00531,map01100,map04142	M00078	R07815	-	ko00000,ko00001,ko00002,ko01000	-	-	DUF1624
Ssa01000358.t1	29730.Gorai.007G125300.1	4.33e-43	149	2D0JC@1|root,2S4TV@2759|Eukaryota,37W1D@33090|Viridiplantae,3GKI5@35493|Streptophyta	35493|Streptophyta	B	Domain in histone families 1 and 5	-	GO:0005575,GO:0005622,GO:0005623,GO:0005634,GO:0005694,GO:0043226,GO:0043227,GO:0043228,GO:0043229,GO:0043231,GO:0043232,GO:0044424,GO:0044464	-	ko:K11275	-	-	-	-	ko00000,ko03036	-	-	Linker_histone
Ssa01000359.t1	3827.XP_004496044.1	9.71e-39	135	2BS7P@1|root,2S1Y2@2759|Eukaryota,37VFR@33090|Viridiplantae,3GJQQ@35493|Streptophyta,4JQPH@91835|fabids	35493|Streptophyta	-	-	-	-	-	-	-	-	-	-	-	-	-	-
Ssa01000360.t1	2711.XP_006480030.1	4.02e-243	670	2BYJN@1|root,2QTN8@2759|Eukaryota,37Q0Y@33090|Viridiplantae,3G9T1@35493|Streptophyta	35493|Streptophyta	G	Belongs to the glycosyltransferase 8 family	-	GO:0000003,GO:0000271,GO:0003006,GO:0003674,GO:0003824,GO:0005575,GO:0005622,GO:0005623,GO:0005737,GO:0005783,GO:0005794,GO:0005975,GO:0005976,GO:0007275,GO:0008150,GO:0008152,GO:0008194,GO:0009058,GO:0009059,GO:0009664,GO:0009791,GO:0009832,GO:0009987,GO:0010154,GO:0010191,GO:0010192,GO:0010214,GO:0010393,GO:0012505,GO:0016043,GO:0016051,GO:0016740,GO:0016757,GO:0016758,GO:0017144,GO:0022414,GO:…	-	-	-	-	-	-	-	-	-	Glyco_transf_8
Ssa01000361.t1	3847.GLYMA19G40160.1	5.92e-170	481	COG5325@1|root,KOG0809@2759|Eukaryota,37TE1@33090|Viridiplantae,3GH8A@35493|Streptophyta,4JFU1@91835|fabids	35493|Streptophyta	U	Belongs to the syntaxin family	-	GO:0000139,GO:0000149,GO:0002790,GO:0002831,GO:0003674,GO:0005488,GO:0005515,GO:0005575,GO:0005622,GO:0005623,GO:0005737,GO:0005794,GO:0005802,GO:0006810,GO:0006906,GO:0006996,GO:0007030,GO:0007034,GO:0008104,GO:0008150,GO:0009306,GO:0009987,GO:0010256,GO:0012505,GO:0015031,GO:0015833,GO:0016020,GO:0016021,GO:0016043,GO:0016050,GO:0016192,GO:0022406,GO:0031090,GO:0031201,GO:0031224,GO:0031347,GO:…	-	ko:K08489	ko04130,map04130	-	-	-	ko00000,ko00001,ko04131	-	-	SNARE
Ssa01000362.t1	3847.GLYMA19G40150.1	9.99e-74	229	2EHB7@1|root,2SN10@2759|Eukaryota,37ZVQ@33090|Viridiplantae,3GJ7A@35493|Streptophyta,4JU78@91835|fabids	35493|Streptophyta	S	Stress-induced protein Di19, C-terminal	-	-	-	-	-	-	-	-	-	-	-	Di19_C,zf-Di19
Ssa01000362.t2	3847.GLYMA19G40150.1	1.45e-75	234	2EHB7@1|root,2SN10@2759|Eukaryota,37ZVQ@33090|Viridiplantae,3GJ7A@35493|Streptophyta,4JU78@91835|fabids	35493|Streptophyta	S	Stress-induced protein Di19, C-terminal	-	-	-	-	-	-	-	-	-	-	-	Di19_C,zf-Di19
Ssa01000363.t1	981085.XP_010103405.1	1.9e-150	437	2CN85@1|root,2QUFP@2759|Eukaryota,37K36@33090|Viridiplantae,3G8N6@35493|Streptophyta,4JEH3@91835|fabids	35493|Streptophyta	S	Protein of unknown function (DUF789)	-	-	-	-	-	-	-	-	-	-	-	DUF789
Ssa01000364.t1	3847.GLYMA02G01900.1	1.36e-315	888	COG5059@1|root,KOG0239@2759|Eukaryota,37KAM@33090|Viridiplantae,3G8QJ@35493|Streptophyta,4JEHT@91835|fabids	35493|Streptophyta	Z	Belongs to the TRAFAC class myosin-kinesin ATPase superfamily. Kinesin family	-	GO:0003674,GO:0003774,GO:0003777,GO:0003779,GO:0003824,GO:0005488,GO:0005515,GO:0005575,GO:0005622,GO:0005623,GO:0005856,GO:0005871,GO:0005875,GO:0006810,GO:0006928,GO:0007017,GO:0007018,GO:0007097,GO:0008017,GO:0008092,GO:0008150,GO:0008569,GO:0009987,GO:0015629,GO:0015630,GO:0015631,GO:0016462,GO:0016787,GO:0016817,GO:0016818,GO:0016887,GO:0017111,GO:0031534,GO:0032991,GO:0042623,GO:0043226,GO:…	-	ko:K10406	-	-	-	-	ko00000,ko04812	-	-	CH,Kinesin,Microtub_bd
Ssa01000365.t1	3885.XP_007145182.1	1.84e-247	710	COG5059@1|root,KOG0239@2759|Eukaryota,37KAM@33090|Viridiplantae,3G8QJ@35493|Streptophyta,4JEHT@91835|fabids	35493|Streptophyta	Z	Belongs to the TRAFAC class myosin-kinesin ATPase superfamily. Kinesin family	-	GO:0003674,GO:0003774,GO:0003777,GO:0003779,GO:0003824,GO:0005488,GO:0005515,GO:0005575,GO:0005622,GO:0005623,GO:0005856,GO:0005871,GO:0005875,GO:0006810,GO:0006928,GO:0007017,GO:0007018,GO:0007097,GO:0008017,GO:0008092,GO:0008150,GO:0008569,GO:0009987,GO:0015629,GO:0015630,GO:0015631,GO:0016462,GO:0016787,GO:0016817,GO:0016818,GO:0016887,GO:0017111,GO:0031534,GO:0032991,GO:0042623,GO:0043226,GO:…	-	ko:K10406	-	-	-	-	ko00000,ko04812	-	-	CH,Kinesin,Microtub_bd
Ssa01000366.t1	3847.GLYMA03G37490.1	8.48e-55	176	COG0484@1|root,KOG0714@2759|Eukaryota,37WB3@33090|Viridiplantae,3GJMW@35493|Streptophyta,4JQJK@91835|fabids	35493|Streptophyta	O	DnaJ homolog subfamily B member	-	GO:0005575,GO:0005622,GO:0005623,GO:0005737,GO:0005813,GO:0005815,GO:0005856,GO:0015630,GO:0043226,GO:0043228,GO:0043229,GO:0043232,GO:0044422,GO:0044424,GO:0044430,GO:0044446,GO:0044464	-	-	-	-	-	-	-	-	-	DnaJ
Ssa01000367.t1	29730.Gorai.001G141300.1	0	902	COG0114@1|root,KOG1317@2759|Eukaryota,37IIH@33090|Viridiplantae,3GBTD@35493|Streptophyta	35493|Streptophyta	C	Fumarate hydratase	-	GO:0000003,GO:0003006,GO:0003674,GO:0003824,GO:0004333,GO:0005575,GO:0005622,GO:0005623,GO:0005737,GO:0005739,GO:0005829,GO:0006082,GO:0006091,GO:0006099,GO:0006101,GO:0006106,GO:0006108,GO:0006807,GO:0006950,GO:0006970,GO:0006979,GO:0008150,GO:0008152,GO:0009060,GO:0009266,GO:0009409,GO:0009628,GO:0009631,GO:0009651,GO:0009856,GO:0009987,GO:0010109,GO:0015980,GO:0016829,GO:0016835,GO:0016836,GO:…	4.2.1.2	ko:K01679	ko00020,ko00620,ko00720,ko01100,ko01110,ko01120,ko01130,ko01200,ko04934,ko05200,ko05211,map00020,map00620,map00720,map01100,map01110,map01120,map01130,map01200,map04934,map05200,map05211	M00009,M00011,M00173,M00376	R01082	RC00443	ko00000,ko00001,ko00002,ko01000	-	-	FumaraseC_C,Lyase_1
Ssa01000368.t1	3847.GLYMA03G37470.1	1.39e-310	861	COG0642@1|root,KOG0519@2759|Eukaryota,37I6R@33090|Viridiplantae,3G8U0@35493|Streptophyta,4JHN2@91835|fabids	35493|Streptophyta	T	Ethylene response sensor	ETR1	GO:0003674,GO:0003824,GO:0004672,GO:0004673,GO:0005488,GO:0005575,GO:0005622,GO:0005623,GO:0005737,GO:0005783,GO:0006464,GO:0006468,GO:0006793,GO:0006796,GO:0006807,GO:0008150,GO:0008152,GO:0009966,GO:0009968,GO:0009987,GO:0010104,GO:0010105,GO:0010646,GO:0010648,GO:0012505,GO:0016301,GO:0016310,GO:0016740,GO:0016772,GO:0016773,GO:0016775,GO:0018106,GO:0018193,GO:0018202,GO:0019538,GO:0023051,GO:…	-	ko:K14509	ko04016,ko04075,map04016,map04075	-	-	-	ko00000,ko00001,ko01000	-	-	GAF,HATPase_c,HisKA,Response_reg
Ssa01000369.t1	3656.XP_008454314.1	4.49e-123	353	COG2147@1|root,KOG1696@2759|Eukaryota,37M2R@33090|Viridiplantae,3GC4Q@35493|Streptophyta,4JIXN@91835|fabids	35493|Streptophyta	J	Belongs to the eukaryotic ribosomal protein eL19 family	-	-	-	ko:K02885	ko03010,map03010	M00177,M00179	-	-	br01610,ko00000,ko00001,ko00002,ko03011	-	-	Ribosomal_L19e
Ssa01000370.t1	3847.GLYMA02G01960.1	2.19e-127	372	28PKW@1|root,2QW91@2759|Eukaryota,37PPN@33090|Viridiplantae,3GHE2@35493|Streptophyta,4JEDP@91835|fabids	35493|Streptophyta	K	transcription factor	-	GO:0003674,GO:0003700,GO:0005575,GO:0005622,GO:0005623,GO:0005634,GO:0006355,GO:0006950,GO:0008150,GO:0009628,GO:0009889,GO:0010468,GO:0010556,GO:0019219,GO:0019222,GO:0031323,GO:0031326,GO:0034059,GO:0036293,GO:0043226,GO:0043227,GO:0043229,GO:0043231,GO:0044424,GO:0044464,GO:0050789,GO:0050793,GO:0050794,GO:0050896,GO:0051171,GO:0051239,GO:0051252,GO:0060255,GO:0065007,GO:0070482,GO:0080090,GO:…	-	ko:K09286	-	-	-	-	ko00000,ko03000	-	-	AP2
Ssa01000371.t1	3827.XP_004495937.1	2.04e-174	503	COG5434@1|root,2QV2R@2759|Eukaryota,37QNY@33090|Viridiplantae,3GC68@35493|Streptophyta,4JS15@91835|fabids	35493|Streptophyta	G	Exopolygalacturonase clone	-	GO:0003674,GO:0003824,GO:0004553,GO:0004650,GO:0005575,GO:0005576,GO:0005618,GO:0005623,GO:0016787,GO:0016798,GO:0030312,GO:0044464,GO:0071944	3.2.1.67	ko:K01213	ko00040,ko01100,map00040,map01100	M00081	R01982,R07413	RC00049	ko00000,ko00001,ko00002,ko01000	-	-	Glyco_hydro_28
Ssa01000372.t1	3847.GLYMA03G37441.1	0	1503	COG0438@1|root,KOG0853@2759|Eukaryota,37Q3U@33090|Viridiplantae,3G9HW@35493|Streptophyta,4JECK@91835|fabids	35493|Streptophyta	M	Sucrose-cleaving enzyme that provides UDP-glucose and fructose for various metabolic pathways	SUS4	GO:0000003,GO:0001101,GO:0003006,GO:0003674,GO:0003824,GO:0005975,GO:0005976,GO:0005982,GO:0005984,GO:0005985,GO:0006073,GO:0006950,GO:0007275,GO:0008150,GO:0008152,GO:0008194,GO:0009311,GO:0009414,GO:0009415,GO:0009628,GO:0009743,GO:0009791,GO:0009987,GO:0010033,GO:0010035,GO:0010154,GO:0010431,GO:0010555,GO:0016157,GO:0016740,GO:0016757,GO:0016758,GO:0021700,GO:0022414,GO:0032501,GO:0032502,GO:…	2.4.1.13	ko:K00695	ko00500,ko01100,map00500,map01100	-	R00806	RC00005,RC00028,RC02748	ko00000,ko00001,ko01000,ko01003	-	GT4	Glycos_transf_1,Sucrose_synth
Ssa01000373.t1	3847.GLYMA02G01990.1	0	938	2CM77@1|root,2QPI6@2759|Eukaryota,37P55@33090|Viridiplantae,3G86B@35493|Streptophyta,4JEK6@91835|fabids	35493|Streptophyta	G	Endoglucanase	-	GO:0003674,GO:0003824,GO:0004553,GO:0007275,GO:0007389,GO:0008150,GO:0008810,GO:0009605,GO:0009607,GO:0009624,GO:0016787,GO:0016798,GO:0032501,GO:0032502,GO:0043207,GO:0048856,GO:0050896,GO:0051704,GO:0051707	-	-	-	-	-	-	-	-	-	Glyco_hydro_9
Ssa01000374.t1	3885.XP_007145198.1	1.31e-292	811	COG4677@1|root,2QVXG@2759|Eukaryota,37MYY@33090|Viridiplantae,3GF3A@35493|Streptophyta,4JE19@91835|fabids	35493|Streptophyta	G	pectinesterase	-	GO:0003674,GO:0003824,GO:0004857,GO:0005575,GO:0005623,GO:0006950,GO:0006952,GO:0008150,GO:0009605,GO:0009607,GO:0009617,GO:0016787,GO:0016788,GO:0030234,GO:0030599,GO:0042742,GO:0043086,GO:0043207,GO:0044092,GO:0044464,GO:0046910,GO:0050790,GO:0050829,GO:0050896,GO:0051704,GO:0051707,GO:0052689,GO:0065007,GO:0065009,GO:0071944,GO:0098542,GO:0098772	3.1.1.11	ko:K01051	ko00040,ko01100,map00040,map01100	M00081	R02362	RC00460,RC00461	ko00000,ko00001,ko00002,ko01000	-	-	PMEI,Pectinesterase
Ssa01000375.t1	4565.Traes_1BL_95AF4DFBD1.1	5.21e-11	63.9	COG4677@1|root,2QUB9@2759|Eukaryota,37KQB@33090|Viridiplantae,3GEH0@35493|Streptophyta,3KVSH@4447|Liliopsida,3I6F4@38820|Poales	35493|Streptophyta	G	Pectinesterase	-	-	3.1.1.11	ko:K01051	ko00040,ko01100,map00040,map01100	M00081	R02362	RC00460,RC00461	ko00000,ko00001,ko00002,ko01000	-	-	PMEI,Pectinesterase
Ssa01000376.t1	225117.XP_009335708.1	6.92e-193	553	COG4677@1|root,2QUB9@2759|Eukaryota,37KQB@33090|Viridiplantae,3GEH0@35493|Streptophyta,4JGX8@91835|fabids	35493|Streptophyta	G	pectinesterase pectinesterase inhibitor	-	GO:0003674,GO:0003824,GO:0004857,GO:0005575,GO:0005623,GO:0006950,GO:0008150,GO:0009266,GO:0009409,GO:0009605,GO:0009607,GO:0009620,GO:0009628,GO:0009719,GO:0009725,GO:0009741,GO:0010033,GO:0014070,GO:0016787,GO:0016788,GO:0030234,GO:0030599,GO:0033993,GO:0042221,GO:0043086,GO:0043207,GO:0044092,GO:0044464,GO:0046910,GO:0050790,GO:0050896,GO:0051704,GO:0051707,GO:0052689,GO:0065007,GO:0065009,GO:…	3.1.1.11	ko:K01051	ko00040,ko01100,map00040,map01100	M00081	R02362	RC00460,RC00461	ko00000,ko00001,ko00002,ko01000	-	-	PMEI,Pectinesterase
Ssa01000377.t1	3880.AES61733	7.36e-261	732	COG4677@1|root,2QUB9@2759|Eukaryota,37KQB@33090|Viridiplantae,3GEH0@35493|Streptophyta,4JGX8@91835|fabids	35493|Streptophyta	G	pectinesterase pectinesterase inhibitor	-	GO:0003674,GO:0003824,GO:0004857,GO:0005575,GO:0005623,GO:0008150,GO:0016787,GO:0016788,GO:0030234,GO:0030599,GO:0043086,GO:0044092,GO:0044464,GO:0046910,GO:0050790,GO:0052689,GO:0065007,GO:0065009,GO:0071944,GO:0098772	3.1.1.11	ko:K01051	ko00040,ko01100,map00040,map01100	M00081	R02362	RC00460,RC00461	ko00000,ko00001,ko00002,ko01000	-	-	PMEI,Pectinesterase
Ssa01000377.t2	3880.AES61733	8.47e-255	717	COG4677@1|root,2QUB9@2759|Eukaryota,37KQB@33090|Viridiplantae,3GEH0@35493|Streptophyta,4JGX8@91835|fabids	35493|Streptophyta	G	pectinesterase pectinesterase inhibitor	-	GO:0003674,GO:0003824,GO:0004857,GO:0005575,GO:0005623,GO:0008150,GO:0016787,GO:0016788,GO:0030234,GO:0030599,GO:0043086,GO:0044092,GO:0044464,GO:0046910,GO:0050790,GO:0052689,GO:0065007,GO:0065009,GO:0071944,GO:0098772	3.1.1.11	ko:K01051	ko00040,ko01100,map00040,map01100	M00081	R02362	RC00460,RC00461	ko00000,ko00001,ko00002,ko01000	-	-	PMEI,Pectinesterase
Ssa01000378.t1	3847.GLYMA19G39990.1	0	881	COG4677@1|root,2QUB9@2759|Eukaryota,37KQB@33090|Viridiplantae,3GEH0@35493|Streptophyta,4JGX8@91835|fabids	35493|Streptophyta	G	pectinesterase pectinesterase inhibitor	-	GO:0003674,GO:0003824,GO:0004857,GO:0005575,GO:0005623,GO:0006950,GO:0008150,GO:0009266,GO:0009409,GO:0009605,GO:0009607,GO:0009620,GO:0009628,GO:0009719,GO:0009725,GO:0009741,GO:0010033,GO:0014070,GO:0016787,GO:0016788,GO:0030234,GO:0030599,GO:0033993,GO:0042221,GO:0043086,GO:0043207,GO:0044092,GO:0044464,GO:0046910,GO:0050790,GO:0050896,GO:0051704,GO:0051707,GO:0052689,GO:0065007,GO:0065009,GO:…	3.1.1.11	ko:K01051	ko00040,ko01100,map00040,map01100	M00081	R02362	RC00460,RC00461	ko00000,ko00001,ko00002,ko01000	-	-	PMEI,Pectinesterase
Ssa01000379.t1	3847.GLYMA19G39980.1	9.76e-42	145	2D92H@1|root,2S5CS@2759|Eukaryota,37WAW@33090|Viridiplantae,3GKKC@35493|Streptophyta,4JR2C@91835|fabids	35493|Streptophyta	S	Inhibitor	-	GO:0005575,GO:0005576	-	-	-	-	-	-	-	-	-	PMEI
Ssa01000380.t2	3847.GLYMA19G39960.2	2.21e-52	176	KOG0800@1|root,KOG0800@2759|Eukaryota,37TD2@33090|Viridiplantae,3GHEI@35493|Streptophyta,4JP0H@91835|fabids	35493|Streptophyta	O	RING-H2 finger protein	-	GO:0000209,GO:0003674,GO:0003824,GO:0004842,GO:0005575,GO:0005622,GO:0005623,GO:0005737,GO:0005768,GO:0005769,GO:0005798,GO:0005886,GO:0006464,GO:0006508,GO:0006511,GO:0006807,GO:0006950,GO:0006970,GO:0007275,GO:0008150,GO:0008152,GO:0009056,GO:0009057,GO:0009628,GO:0009987,GO:0010498,GO:0012505,GO:0016020,GO:0016567,GO:0016740,GO:0019538,GO:0019787,GO:0019941,GO:0022622,GO:0030100,GO:0030163,GO:…	2.3.2.27	ko:K16286	-	-	-	-	ko00000,ko01000,ko04121	-	-	zf-RING_2
Ssa01000380.t1	3847.GLYMA19G39960.2	8.38e-53	177	KOG0800@1|root,KOG0800@2759|Eukaryota,37TD2@33090|Viridiplantae,3GHEI@35493|Streptophyta,4JP0H@91835|fabids	35493|Streptophyta	O	RING-H2 finger protein	-	GO:0000209,GO:0003674,GO:0003824,GO:0004842,GO:0005575,GO:0005622,GO:0005623,GO:0005737,GO:0005768,GO:0005769,GO:0005798,GO:0005886,GO:0006464,GO:0006508,GO:0006511,GO:0006807,GO:0006950,GO:0006970,GO:0007275,GO:0008150,GO:0008152,GO:0009056,GO:0009057,GO:0009628,GO:0009987,GO:0010498,GO:0012505,GO:0016020,GO:0016567,GO:0016740,GO:0019538,GO:0019787,GO:0019941,GO:0022622,GO:0030100,GO:0030163,GO:…	2.3.2.27	ko:K16286	-	-	-	-	ko00000,ko01000,ko04121	-	-	zf-RING_2
Ssa01000381.t2	3694.POPTR_0002s20400.1	2.01e-121	347	COG1727@1|root,KOG1714@2759|Eukaryota,37SDX@33090|Viridiplantae,3GBUI@35493|Streptophyta,4JDPF@91835|fabids	35493|Streptophyta	J	60S ribosomal protein	RPL18	GO:0003674,GO:0003676,GO:0003723,GO:0003729,GO:0003735,GO:0005198,GO:0005488,GO:0005575,GO:0005622,GO:0005623,GO:0005737,GO:0005773,GO:0005774,GO:0005829,GO:0005840,GO:0005886,GO:0005911,GO:0006412,GO:0006518,GO:0006807,GO:0008150,GO:0008152,GO:0009058,GO:0009059,GO:0009506,GO:0009507,GO:0009536,GO:0009987,GO:0010467,GO:0015934,GO:0016020,GO:0019538,GO:0022625,GO:0022626,GO:0030054,GO:0031090,GO:…	-	ko:K02883	ko03010,map03010	M00177,M00179	-	-	br01610,ko00000,ko00001,ko00002,ko03011	-	-	Ribosomal_L18
Ssa01000381.t1	3694.POPTR_0002s20400.1	1.48e-120	347	COG1727@1|root,KOG1714@2759|Eukaryota,37SDX@33090|Viridiplantae,3GBUI@35493|Streptophyta,4JDPF@91835|fabids	35493|Streptophyta	J	60S ribosomal protein	RPL18	GO:0003674,GO:0003676,GO:0003723,GO:0003729,GO:0003735,GO:0005198,GO:0005488,GO:0005575,GO:0005622,GO:0005623,GO:0005737,GO:0005773,GO:0005774,GO:0005829,GO:0005840,GO:0005886,GO:0005911,GO:0006412,GO:0006518,GO:0006807,GO:0008150,GO:0008152,GO:0009058,GO:0009059,GO:0009506,GO:0009507,GO:0009536,GO:0009987,GO:0010467,GO:0015934,GO:0016020,GO:0019538,GO:0022625,GO:0022626,GO:0030054,GO:0031090,GO:…	-	ko:K02883	ko03010,map03010	M00177,M00179	-	-	br01610,ko00000,ko00001,ko00002,ko03011	-	-	Ribosomal_L18
Ssa01000382.t1	28532.XP_010544999.1	9.65e-70	215	2AH5Z@1|root,2RZ1I@2759|Eukaryota,37UP4@33090|Viridiplantae,3GJ0Z@35493|Streptophyta,3I03A@3699|Brassicales	35493|Streptophyta	T	Protein of unknown function, DUF538	-	-	-	-	-	-	-	-	-	-	-	DUF538
Ssa01000383.t1	3847.GLYMA02G02070.1	1.75e-28	105	2CI1Y@1|root,2S70H@2759|Eukaryota,37WRX@33090|Viridiplantae,3GKY7@35493|Streptophyta,4JR0U@91835|fabids	35493|Streptophyta	S	Indole-3-acetic acid-induced protein	-	GO:0000302,GO:0001101,GO:0002831,GO:0005575,GO:0005622,GO:0005623,GO:0005634,GO:0005737,GO:0005739,GO:0005829,GO:0006950,GO:0006970,GO:0006979,GO:0007154,GO:0007275,GO:0007568,GO:0008150,GO:0009266,GO:0009314,GO:0009409,GO:0009414,GO:0009415,GO:0009416,GO:0009605,GO:0009607,GO:0009611,GO:0009620,GO:0009625,GO:0009628,GO:0009636,GO:0009642,GO:0009646,GO:0009651,GO:0009719,GO:0009723,GO:0009725,GO:…	-	-	-	-	-	-	-	-	-	LEA_3
Ssa01000384.t1	3827.XP_004494379.1	5.52e-155	437	KOG4206@1|root,KOG4206@2759|Eukaryota,37P0N@33090|Viridiplantae,3GEPH@35493|Streptophyta,4JMGB@91835|fabids	35493|Streptophyta	A	U1 small nuclear ribonucleoprotein	-	GO:0000375,GO:0000377,GO:0000398,GO:0003674,GO:0003676,GO:0003723,GO:0005488,GO:0005515,GO:0005575,GO:0005622,GO:0005623,GO:0005634,GO:0005654,GO:0005681,GO:0005685,GO:0005730,GO:0005737,GO:0005829,GO:0006139,GO:0006396,GO:0006397,GO:0006725,GO:0006807,GO:0008150,GO:0008152,GO:0008380,GO:0009987,GO:0010467,GO:0016070,GO:0016071,GO:0017069,GO:0030532,GO:0030619,GO:0031974,GO:0031981,GO:0032991,GO:…	-	ko:K11091	ko03040,map03040	M00351	-	-	ko00000,ko00001,ko00002,ko03041	-	-	RRM_1
Ssa01000384.t2	3827.XP_004494379.1	7.87e-157	441	KOG4206@1|root,KOG4206@2759|Eukaryota,37P0N@33090|Viridiplantae,3GEPH@35493|Streptophyta,4JMGB@91835|fabids	35493|Streptophyta	A	U1 small nuclear ribonucleoprotein	-	GO:0000375,GO:0000377,GO:0000398,GO:0003674,GO:0003676,GO:0003723,GO:0005488,GO:0005515,GO:0005575,GO:0005622,GO:0005623,GO:0005634,GO:0005654,GO:0005681,GO:0005685,GO:0005730,GO:0005737,GO:0005829,GO:0006139,GO:0006396,GO:0006397,GO:0006725,GO:0006807,GO:0008150,GO:0008152,GO:0008380,GO:0009987,GO:0010467,GO:0016070,GO:0016071,GO:0017069,GO:0030532,GO:0030619,GO:0031974,GO:0031981,GO:0032991,GO:…	-	ko:K11091	ko03040,map03040	M00351	-	-	ko00000,ko00001,ko00002,ko03041	-	-	RRM_1
Ssa01000385.t1	3847.GLYMA03G37300.2	0	944	COG5644@1|root,KOG2172@2759|Eukaryota,37I2R@33090|Viridiplantae,3GB7F@35493|Streptophyta,4JEK5@91835|fabids	35493|Streptophyta	S	U3 small nucleolar RNA-associated protein	-	GO:0000154,GO:0000447,GO:0000460,GO:0000462,GO:0000466,GO:0000469,GO:0000472,GO:0000478,GO:0000479,GO:0000480,GO:0000966,GO:0000967,GO:0001510,GO:0005575,GO:0005622,GO:0005623,GO:0005634,GO:0005654,GO:0005730,GO:0006139,GO:0006364,GO:0006396,GO:0006725,GO:0006807,GO:0008150,GO:0008152,GO:0009451,GO:0009987,GO:0010467,GO:0016070,GO:0016072,GO:0022613,GO:0030490,GO:0030684,GO:0031167,GO:0031974,GO:…	-	ko:K14567	ko03008,map03008	-	-	-	ko00000,ko00001,ko03009	-	-	Utp14
Ssa01000386.t1	3847.GLYMA02G02100.1	0	1182	KOG2065@1|root,KOG2065@2759|Eukaryota,37KM1@33090|Viridiplantae,3GDCP@35493|Streptophyta,4JDVZ@91835|fabids	35493|Streptophyta	Z	Gamma-tubulin complex is necessary for microtubule nucleation at the centrosome	GCP4	GO:0000003,GO:0000226,GO:0000278,GO:0000280,GO:0000923,GO:0000930,GO:0003674,GO:0005198,GO:0005200,GO:0005488,GO:0005515,GO:0005575,GO:0005622,GO:0005623,GO:0005737,GO:0005815,GO:0005819,GO:0005856,GO:0005911,GO:0006996,GO:0007010,GO:0007017,GO:0007020,GO:0007049,GO:0007051,GO:0007052,GO:0008092,GO:0008150,GO:0009506,GO:0009605,GO:0009607,GO:0009624,GO:0009987,GO:0015630,GO:0015631,GO:0016043,GO:…	-	ko:K16571	-	-	-	-	ko00000,ko03036,ko04812	-	-	Spc97_Spc98
Ssa01000387.t1	3847.GLYMA19G39890.1	2.12e-138	401	COG3315@1|root,2QQB5@2759|Eukaryota,37IUJ@33090|Viridiplantae,3GAFW@35493|Streptophyta,4JFNG@91835|fabids	35493|Streptophyta	Q	Leucine carboxyl methyltransferase	-	-	-	ko:K02885	ko03010,map03010	M00177,M00179	-	-	br01610,ko00000,ko00001,ko00002,ko03011	-	-	LCM
Ssa01000388.t1	102107.XP_008235103.1	1.13e-262	729	COG0415@1|root,KOG0133@2759|Eukaryota,37PJX@33090|Viridiplantae,3GDKD@35493|Streptophyta,4JRQ8@91835|fabids	35493|Streptophyta	LT	Blue-light photoreceptor	PHR2	-	4.1.99.3	ko:K01669	-	-	-	-	ko00000,ko01000,ko03400	-	-	DNA_photolyase
Ssa01000388.t2	102107.XP_008235103.1	2.32e-266	739	COG0415@1|root,KOG0133@2759|Eukaryota,37PJX@33090|Viridiplantae,3GDKD@35493|Streptophyta,4JRQ8@91835|fabids	35493|Streptophyta	LT	Blue-light photoreceptor	PHR2	-	4.1.99.3	ko:K01669	-	-	-	-	ko00000,ko01000,ko03400	-	-	DNA_photolyase
Ssa01000388.t3	102107.XP_008235103.1	6.79e-263	728	COG0415@1|root,KOG0133@2759|Eukaryota,37PJX@33090|Viridiplantae,3GDKD@35493|Streptophyta,4JRQ8@91835|fabids	35493|Streptophyta	LT	Blue-light photoreceptor	PHR2	-	4.1.99.3	ko:K01669	-	-	-	-	ko00000,ko01000,ko03400	-	-	DNA_photolyase
Ssa01000388.t4	102107.XP_008235103.1	1.4e-266	738	COG0415@1|root,KOG0133@2759|Eukaryota,37PJX@33090|Viridiplantae,3GDKD@35493|Streptophyta,4JRQ8@91835|fabids	35493|Streptophyta	LT	Blue-light photoreceptor	PHR2	-	4.1.99.3	ko:K01669	-	-	-	-	ko00000,ko01000,ko03400	-	-	DNA_photolyase
Ssa01000389.t1	3885.XP_007144330.1	5.21e-294	812	KOG1306@1|root,KOG1306@2759|Eukaryota,37R6E@33090|Viridiplantae,3G91P@35493|Streptophyta,4JGPD@91835|fabids	35493|Streptophyta	PT	Belongs to the Ca(2 ) cation antiporter (CaCA) (TC 2.A.19) family	MHX	GO:0000302,GO:0001666,GO:0002028,GO:0003008,GO:0003674,GO:0005215,GO:0005432,GO:0005488,GO:0005509,GO:0005575,GO:0005622,GO:0005623,GO:0005737,GO:0005739,GO:0005856,GO:0005874,GO:0005886,GO:0005887,GO:0005911,GO:0006810,GO:0006811,GO:0006812,GO:0006814,GO:0006816,GO:0006873,GO:0006874,GO:0006875,GO:0006937,GO:0006942,GO:0006950,GO:0006979,GO:0007154,GO:0007165,GO:0007204,GO:0007275,GO:0007399,GO:…	-	ko:K03452	-	-	-	-	ko00000,ko02000	2.A.19.6	-	Na_Ca_ex
Ssa01000389.t2	3885.XP_007144330.1	5.88e-288	798	KOG1306@1|root,KOG1306@2759|Eukaryota,37R6E@33090|Viridiplantae,3G91P@35493|Streptophyta,4JGPD@91835|fabids	35493|Streptophyta	PT	Belongs to the Ca(2 ) cation antiporter (CaCA) (TC 2.A.19) family	MHX	GO:0000302,GO:0001666,GO:0002028,GO:0003008,GO:0003674,GO:0005215,GO:0005432,GO:0005488,GO:0005509,GO:0005575,GO:0005622,GO:0005623,GO:0005737,GO:0005739,GO:0005856,GO:0005874,GO:0005886,GO:0005887,GO:0005911,GO:0006810,GO:0006811,GO:0006812,GO:0006814,GO:0006816,GO:0006873,GO:0006874,GO:0006875,GO:0006937,GO:0006942,GO:0006950,GO:0006979,GO:0007154,GO:0007165,GO:0007204,GO:0007275,GO:0007399,GO:…	-	ko:K03452	-	-	-	-	ko00000,ko02000	2.A.19.6	-	Na_Ca_ex
Ssa01000390.t1	3847.GLYMA10G02260.1	7.69e-291	806	KOG4197@1|root,KOG4197@2759|Eukaryota,37NCA@33090|Viridiplantae,3GEE2@35493|Streptophyta,4JSID@91835|fabids	35493|Streptophyta	S	DYW family of nucleic acid deaminases	-	GO:0003674,GO:0003676,GO:0003723,GO:0003824,GO:0004518,GO:0004519,GO:0005488,GO:0005575,GO:0005622,GO:0005623,GO:0006139,GO:0006725,GO:0006807,GO:0008150,GO:0008152,GO:0009451,GO:0009987,GO:0016070,GO:0016787,GO:0016788,GO:0034641,GO:0043170,GO:0043226,GO:0043227,GO:0043229,GO:0043231,GO:0043412,GO:0044237,GO:0044238,GO:0044424,GO:0044464,GO:0046483,GO:0071704,GO:0090304,GO:0090305,GO:0097159,GO:…	-	ko:K03452	-	-	-	-	ko00000,ko02000	2.A.19.6	-	DYW_deaminase,PPR,PPR_2
Ssa01000391.t1	102107.XP_008235099.1	9.53e-76	227	KOG3434@1|root,KOG3434@2759|Eukaryota,37UKJ@33090|Viridiplantae,3GIM0@35493|Streptophyta,4JPTR@91835|fabids	35493|Streptophyta	J	60S ribosomal protein	-	-	-	ko:K02891	ko03010,map03010	M00177	-	-	br01610,ko00000,ko00001,ko00002,ko03011	-	-	Ribosomal_L22e
Ssa01000392.t1	3885.XP_007144327.1	1.46e-69	212	2BME1@1|root,2S1KR@2759|Eukaryota,37VET@33090|Viridiplantae,3GJTY@35493|Streptophyta,4JQ40@91835|fabids	35493|Streptophyta	U	Outer envelope pore protein 16-4	-	GO:0003674,GO:0005488,GO:0005515,GO:0005575,GO:0005622,GO:0005623,GO:0005737,GO:0008104,GO:0008150,GO:0009526,GO:0009527,GO:0009536,GO:0016020,GO:0019867,GO:0031090,GO:0031967,GO:0031968,GO:0031975,GO:0033036,GO:0033365,GO:0034613,GO:0042170,GO:0042802,GO:0042803,GO:0043226,GO:0043227,GO:0043229,GO:0043231,GO:0044422,GO:0044424,GO:0044435,GO:0044444,GO:0044446,GO:0044464,GO:0046983,GO:0051179,GO:…	-	ko:K17790,ko:K17795	-	-	-	-	ko00000,ko02000,ko03029	3.A.8.1	-	Tim17
Ssa01000393.t1	3885.XP_007163113.1	3.09e-154	441	COG0451@1|root,KOG1429@2759|Eukaryota,37K7R@33090|Viridiplantae,3GH1V@35493|Streptophyta,4JIKG@91835|fabids	35493|Streptophyta	GM	UDP-glucuronic acid decarboxylase	-	GO:0000139,GO:0000166,GO:0003674,GO:0003824,GO:0005488,GO:0005575,GO:0005622,GO:0005623,GO:0005737,GO:0005768,GO:0005794,GO:0005802,GO:0005886,GO:0005975,GO:0005996,GO:0006139,GO:0006725,GO:0006807,GO:0008150,GO:0008152,GO:0008460,GO:0009058,GO:0009225,GO:0009226,GO:0009987,GO:0012505,GO:0016020,GO:0016829,GO:0016830,GO:0016831,GO:0016835,GO:0016836,GO:0018130,GO:0019305,GO:0019321,GO:0019438,GO:…	4.1.1.35	ko:K08678	ko00520,ko01100,map00520,map01100	M00361	R01384	RC00508	ko00000,ko00001,ko00002,ko01000	-	-	GDP_Man_Dehyd
Ssa01000394.t1	3847.GLYMA10G02290.1	2.28e-104	315	COG0451@1|root,KOG1429@2759|Eukaryota,37K7R@33090|Viridiplantae,3GH1V@35493|Streptophyta,4JIKG@91835|fabids	35493|Streptophyta	GM	UDP-glucuronic acid decarboxylase	-	GO:0000139,GO:0000166,GO:0003674,GO:0003824,GO:0005488,GO:0005575,GO:0005622,GO:0005623,GO:0005737,GO:0005768,GO:0005794,GO:0005802,GO:0005886,GO:0005975,GO:0005996,GO:0006139,GO:0006725,GO:0006807,GO:0008150,GO:0008152,GO:0008460,GO:0009058,GO:0009225,GO:0009226,GO:0009987,GO:0012505,GO:0016020,GO:0016829,GO:0016830,GO:0016831,GO:0016835,GO:0016836,GO:0018130,GO:0019305,GO:0019321,GO:0019438,GO:…	4.1.1.35	ko:K08678	ko00520,ko01100,map00520,map01100	M00361	R01384	RC00508	ko00000,ko00001,ko00002,ko01000	-	-	GDP_Man_Dehyd
Ssa01000395.t1	3885.XP_007144319.1	6.88e-47	152	2BXNW@1|root,2S3M4@2759|Eukaryota,37W8Y@33090|Viridiplantae,3GKDB@35493|Streptophyta,4JQHH@91835|fabids	35493|Streptophyta	S	Belongs to the complex I LYR family	-	-	-	ko:K18170	-	-	-	-	ko00000,ko03029	-	-	Complex1_LYR
Ssa01000396.t2	3847.GLYMA19G39850.13	1.23e-155	444	COG0724@1|root,KOG0105@2759|Eukaryota,37QU8@33090|Viridiplantae,3GBN3@35493|Streptophyta,4JT53@91835|fabids	35493|Streptophyta	A	RNA recognition motif	-	GO:0003674,GO:0003676,GO:0003723,GO:0003729,GO:0005488,GO:0005575,GO:0005622,GO:0005623,GO:0005634,GO:0005654,GO:0016604,GO:0016607,GO:0031974,GO:0031981,GO:0035061,GO:0043226,GO:0043227,GO:0043229,GO:0043231,GO:0043233,GO:0044422,GO:0044424,GO:0044428,GO:0044446,GO:0044451,GO:0044464,GO:0070013,GO:0097159,GO:1901363	-	ko:K12890	ko03040,ko04657,ko05168,map03040,map04657,map05168	-	-	-	ko00000,ko00001,ko03041	-	-	Ndufs5,RRM_1
Ssa01000396.t1	3885.XP_007163109.1	1.83e-136	394	COG0724@1|root,KOG0105@2759|Eukaryota,37QU8@33090|Viridiplantae,3GBN3@35493|Streptophyta,4JI43@91835|fabids	35493|Streptophyta	A	RNA recognition motif	-	GO:0003674,GO:0003676,GO:0003723,GO:0003729,GO:0005488,GO:0005575,GO:0005622,GO:0005623,GO:0005634,GO:0005654,GO:0016604,GO:0016607,GO:0031974,GO:0031981,GO:0035061,GO:0043226,GO:0043227,GO:0043229,GO:0043231,GO:0043233,GO:0044422,GO:0044424,GO:0044428,GO:0044446,GO:0044451,GO:0044464,GO:0070013,GO:0097159,GO:1901363	-	ko:K12890	ko03040,ko04657,ko05168,map03040,map04657,map05168	-	-	-	ko00000,ko00001,ko03041	-	-	Ndufs5,RRM_1
Ssa01000396.t3	3885.XP_007163109.1	1.77e-136	394	COG0724@1|root,KOG0105@2759|Eukaryota,37QU8@33090|Viridiplantae,3GBN3@35493|Streptophyta,4JI43@91835|fabids	35493|Streptophyta	A	RNA recognition motif	-	GO:0003674,GO:0003676,GO:0003723,GO:0003729,GO:0005488,GO:0005575,GO:0005622,GO:0005623,GO:0005634,GO:0005654,GO:0016604,GO:0016607,GO:0031974,GO:0031981,GO:0035061,GO:0043226,GO:0043227,GO:0043229,GO:0043231,GO:0043233,GO:0044422,GO:0044424,GO:0044428,GO:0044446,GO:0044451,GO:0044464,GO:0070013,GO:0097159,GO:1901363	-	ko:K12890	ko03040,ko04657,ko05168,map03040,map04657,map05168	-	-	-	ko00000,ko00001,ko03041	-	-	Ndufs5,RRM_1
Ssa01000397.t1	85681.XP_006444317.1	2.96e-174	493	28IKJ@1|root,2QQ62@2759|Eukaryota,37IUA@33090|Viridiplantae,3GBJX@35493|Streptophyta	35493|Streptophyta	S	Phytochrome A-associated F-box	-	GO:0000003,GO:0003006,GO:0003674,GO:0003824,GO:0004842,GO:0005575,GO:0005622,GO:0005623,GO:0005634,GO:0006464,GO:0006807,GO:0007154,GO:0007165,GO:0007275,GO:0007602,GO:0008150,GO:0008152,GO:0009314,GO:0009416,GO:0009581,GO:0009582,GO:0009583,GO:0009585,GO:0009605,GO:0009628,GO:0009639,GO:0009648,GO:0009791,GO:0009987,GO:0010017,GO:0010099,GO:0010228,GO:0016567,GO:0016740,GO:0019538,GO:0019787,GO:…	-	-	-	-	-	-	-	-	-	F-box,F-box-like
Ssa01000398.t1	3847.GLYMA02G02230.3	3.07e-268	747	COG2723@1|root,KOG0626@2759|Eukaryota,37HZ7@33090|Viridiplantae,3GEM1@35493|Streptophyta,4JRBS@91835|fabids	35493|Streptophyta	G	Belongs to the glycosyl hydrolase 1 family	BGLU5	GO:0003674,GO:0003824,GO:0004553,GO:0005575,GO:0005622,GO:0005623,GO:0005737,GO:0005773,GO:0005777,GO:0008150,GO:0008152,GO:0008422,GO:0009628,GO:0009812,GO:0015926,GO:0016787,GO:0016798,GO:0042440,GO:0042579,GO:0043226,GO:0043227,GO:0043229,GO:0043231,GO:0044424,GO:0044444,GO:0044464,GO:0046283,GO:0050896,GO:0071704,GO:0080167,GO:1901135,GO:1901657	3.2.1.21,3.5.2.17	ko:K01188,ko:K19964	ko00230,ko00460,ko00500,ko00940,ko01100,ko01110,ko01120,map00230,map00460,map00500,map00940,map01100,map01110,map01120	-	R00026,R02558,R02887,R02985,R03527,R04949,R04998,R06601,R10035,R10039,R10040	RC00049,RC00059,RC00171,RC00262,RC00397,RC00451,RC00714,RC00746,RC01248,RC03393	ko00000,ko00001,ko01000	-	GH1	Glyco_hydro_1
Ssa01000398.t2	3847.GLYMA02G02230.3	4.71e-224	630	COG2723@1|root,KOG0626@2759|Eukaryota,37HZ7@33090|Viridiplantae,3GEM1@35493|Streptophyta,4JRBS@91835|fabids	35493|Streptophyta	G	Belongs to the glycosyl hydrolase 1 family	BGLU5	GO:0003674,GO:0003824,GO:0004553,GO:0005575,GO:0005622,GO:0005623,GO:0005737,GO:0005773,GO:0005777,GO:0008150,GO:0008152,GO:0008422,GO:0009628,GO:0009812,GO:0015926,GO:0016787,GO:0016798,GO:0042440,GO:0042579,GO:0043226,GO:0043227,GO:0043229,GO:0043231,GO:0044424,GO:0044444,GO:0044464,GO:0046283,GO:0050896,GO:0071704,GO:0080167,GO:1901135,GO:1901657	3.2.1.21,3.5.2.17	ko:K01188,ko:K19964	ko00230,ko00460,ko00500,ko00940,ko01100,ko01110,ko01120,map00230,map00460,map00500,map00940,map01100,map01110,map01120	-	R00026,R02558,R02887,R02985,R03527,R04949,R04998,R06601,R10035,R10039,R10040	RC00049,RC00059,RC00171,RC00262,RC00397,RC00451,RC00714,RC00746,RC01248,RC03393	ko00000,ko00001,ko01000	-	GH1	Glyco_hydro_1
Ssa01000400.t1	2711.XP_006487493.1	4.66e-89	263	COG0589@1|root,2RXKR@2759|Eukaryota,37TR9@33090|Viridiplantae,3GHVN@35493|Streptophyta	35493|Streptophyta	T	Universal stress protein	-	-	-	-	-	-	-	-	-	-	-	Usp
Ssa01000401.t1	3641.EOX95060	1.9e-88	262	COG0589@1|root,2RXKR@2759|Eukaryota,37TR9@33090|Viridiplantae,3GHVN@35493|Streptophyta	35493|Streptophyta	T	Universal stress protein	-	-	-	-	-	-	-	-	-	-	-	Usp
Ssa01000402.t1	3847.GLYMA19G39830.1	1.84e-198	554	2CMJ4@1|root,2QQHB@2759|Eukaryota,37M6V@33090|Viridiplantae,3G9AF@35493|Streptophyta,4JEUC@91835|fabids	35493|Streptophyta	O	E3 ubiquitin-protein ligase	-	GO:0001101,GO:0002376,GO:0003674,GO:0003824,GO:0004842,GO:0005575,GO:0005622,GO:0005623,GO:0005634,GO:0005886,GO:0006082,GO:0006464,GO:0006508,GO:0006511,GO:0006725,GO:0006807,GO:0006950,GO:0006952,GO:0006955,GO:0008150,GO:0008152,GO:0008219,GO:0009056,GO:0009057,GO:0009058,GO:0009605,GO:0009607,GO:0009617,GO:0009626,GO:0009627,GO:0009696,GO:0009697,GO:0009719,GO:0009725,GO:0009751,GO:0009814,GO:…	2.3.2.27	ko:K16275	-	-	-	-	ko00000,ko01000,ko04121	-	-	zf-C3HC4,zf-C3HC4_3,zf-RING_UBOX
Ssa01000402.t2	3847.GLYMA19G39830.1	9.98e-183	513	2CMJ4@1|root,2QQHB@2759|Eukaryota,37M6V@33090|Viridiplantae,3G9AF@35493|Streptophyta,4JEUC@91835|fabids	35493|Streptophyta	O	E3 ubiquitin-protein ligase	-	GO:0001101,GO:0002376,GO:0003674,GO:0003824,GO:0004842,GO:0005575,GO:0005622,GO:0005623,GO:0005634,GO:0005886,GO:0006082,GO:0006464,GO:0006508,GO:0006511,GO:0006725,GO:0006807,GO:0006950,GO:0006952,GO:0006955,GO:0008150,GO:0008152,GO:0008219,GO:0009056,GO:0009057,GO:0009058,GO:0009605,GO:0009607,GO:0009617,GO:0009626,GO:0009627,GO:0009696,GO:0009697,GO:0009719,GO:0009725,GO:0009751,GO:0009814,GO:…	2.3.2.27	ko:K16275	-	-	-	-	ko00000,ko01000,ko04121	-	-	zf-C3HC4,zf-C3HC4_3,zf-RING_UBOX
Ssa01000402.t3	3847.GLYMA19G39830.1	2.87e-159	451	2CMJ4@1|root,2QQHB@2759|Eukaryota,37M6V@33090|Viridiplantae,3G9AF@35493|Streptophyta,4JEUC@91835|fabids	35493|Streptophyta	O	E3 ubiquitin-protein ligase	-	GO:0001101,GO:0002376,GO:0003674,GO:0003824,GO:0004842,GO:0005575,GO:0005622,GO:0005623,GO:0005634,GO:0005886,GO:0006082,GO:0006464,GO:0006508,GO:0006511,GO:0006725,GO:0006807,GO:0006950,GO:0006952,GO:0006955,GO:0008150,GO:0008152,GO:0008219,GO:0009056,GO:0009057,GO:0009058,GO:0009605,GO:0009607,GO:0009617,GO:0009626,GO:0009627,GO:0009696,GO:0009697,GO:0009719,GO:0009725,GO:0009751,GO:0009814,GO:…	2.3.2.27	ko:K16275	-	-	-	-	ko00000,ko01000,ko04121	-	-	zf-C3HC4,zf-C3HC4_3,zf-RING_UBOX
Ssa01000403.t1	3827.XP_004495968.1	1.38e-84	254	KOG3158@1|root,KOG3158@2759|Eukaryota,37JDD@33090|Viridiplantae,3GE8A@35493|Streptophyta,4JP07@91835|fabids	35493|Streptophyta	O	CS domain	-	GO:0005575,GO:0005622,GO:0005623,GO:0005634,GO:0005737,GO:0005829,GO:0005886,GO:0005911,GO:0007275,GO:0008150,GO:0009506,GO:0009888,GO:0009893,GO:0009966,GO:0009968,GO:0010449,GO:0010468,GO:0010604,GO:0010628,GO:0010646,GO:0010648,GO:0010817,GO:0016020,GO:0019222,GO:0022622,GO:0023051,GO:0023057,GO:0030054,GO:0032501,GO:0032502,GO:0032879,GO:0035266,GO:0040007,GO:0043226,GO:0043227,GO:0043229,GO:…	5.3.99.3	ko:K15730	ko00590,ko01100,map00590,map01100	-	R02265	RC00672	ko00000,ko00001,ko01000	-	-	CS
Ssa01000404.t3	3847.GLYMA02G17410.2	0	1761	COG0464@1|root,KOG0737@2759|Eukaryota,37IUV@33090|Viridiplantae,3G8DY@35493|Streptophyta,4JK3P@91835|fabids	35493|Streptophyta	O	Holliday junction DNA helicase ruvB N-terminus	-	GO:0002090,GO:0002092,GO:0003008,GO:0003674,GO:0003824,GO:0005575,GO:0005622,GO:0005623,GO:0005634,GO:0005886,GO:0007610,GO:0007611,GO:0007612,GO:0007613,GO:0008150,GO:0009893,GO:0010604,GO:0010646,GO:0010648,GO:0016020,GO:0016462,GO:0016787,GO:0016817,GO:0016818,GO:0016887,GO:0017111,GO:0019222,GO:0023051,GO:0023057,GO:0030100,GO:0031323,GO:0031325,GO:0032501,GO:0032879,GO:0043226,GO:0043227,GO:…	-	-	-	-	-	-	-	-	-	AAA,FHA
Ssa01000404.t1	3847.GLYMA02G17410.2	0	1833	COG0464@1|root,KOG0737@2759|Eukaryota,37IUV@33090|Viridiplantae,3G8DY@35493|Streptophyta,4JK3P@91835|fabids	35493|Streptophyta	O	Holliday junction DNA helicase ruvB N-terminus	-	GO:0002090,GO:0002092,GO:0003008,GO:0003674,GO:0003824,GO:0005575,GO:0005622,GO:0005623,GO:0005634,GO:0005886,GO:0007610,GO:0007611,GO:0007612,GO:0007613,GO:0008150,GO:0009893,GO:0010604,GO:0010646,GO:0010648,GO:0016020,GO:0016462,GO:0016787,GO:0016817,GO:0016818,GO:0016887,GO:0017111,GO:0019222,GO:0023051,GO:0023057,GO:0030100,GO:0031323,GO:0031325,GO:0032501,GO:0032879,GO:0043226,GO:0043227,GO:…	-	-	-	-	-	-	-	-	-	AAA,FHA
Ssa01000404.t2	3847.GLYMA02G17410.2	0	1831	COG0464@1|root,KOG0737@2759|Eukaryota,37IUV@33090|Viridiplantae,3G8DY@35493|Streptophyta,4JK3P@91835|fabids	35493|Streptophyta	O	Holliday junction DNA helicase ruvB N-terminus	-	GO:0002090,GO:0002092,GO:0003008,GO:0003674,GO:0003824,GO:0005575,GO:0005622,GO:0005623,GO:0005634,GO:0005886,GO:0007610,GO:0007611,GO:0007612,GO:0007613,GO:0008150,GO:0009893,GO:0010604,GO:0010646,GO:0010648,GO:0016020,GO:0016462,GO:0016787,GO:0016817,GO:0016818,GO:0016887,GO:0017111,GO:0019222,GO:0023051,GO:0023057,GO:0030100,GO:0031323,GO:0031325,GO:0032501,GO:0032879,GO:0043226,GO:0043227,GO:…	-	-	-	-	-	-	-	-	-	AAA,FHA
Ssa01000405.t2	3988.XP_002531882.1	1.26e-18	84.3	COG3145@1|root,KOG4176@2759|Eukaryota,37NFG@33090|Viridiplantae,3GFYK@35493|Streptophyta,4JH1N@91835|fabids	35493|Streptophyta	L	Alkylated DNA repair protein	-	GO:0000049,GO:0001510,GO:0002097,GO:0002098,GO:0003674,GO:0003676,GO:0003723,GO:0003824,GO:0005488,GO:0005506,GO:0005575,GO:0005622,GO:0005623,GO:0005634,GO:0005737,GO:0005829,GO:0006139,GO:0006396,GO:0006399,GO:0006400,GO:0006725,GO:0006807,GO:0008033,GO:0008150,GO:0008152,GO:0008168,GO:0008173,GO:0008175,GO:0008198,GO:0008270,GO:0009451,GO:0009987,GO:0010467,GO:0016070,GO:0016300,GO:0016491,GO:…	-	-	-	-	-	-	-	-	-	2OG-FeII_Oxy_2
Ssa01000405.t1	4432.XP_010259612.1	8.26e-106	314	COG3145@1|root,KOG4176@2759|Eukaryota,37NFG@33090|Viridiplantae,3GFYK@35493|Streptophyta	35493|Streptophyta	L	Alkylated DNA repair protein alkB homolog	-	GO:0000049,GO:0001510,GO:0002097,GO:0002098,GO:0003674,GO:0003676,GO:0003723,GO:0003824,GO:0005488,GO:0005506,GO:0005575,GO:0005622,GO:0005623,GO:0005634,GO:0005737,GO:0005829,GO:0006139,GO:0006396,GO:0006399,GO:0006400,GO:0006725,GO:0006807,GO:0008033,GO:0008150,GO:0008152,GO:0008168,GO:0008173,GO:0008175,GO:0008198,GO:0008270,GO:0009451,GO:0009987,GO:0010467,GO:0016070,GO:0016300,GO:0016491,GO:…	-	-	-	-	-	-	-	-	-	2OG-FeII_Oxy_2
Ssa01000406.t1	3847.GLYMA03G37140.1	1.19e-73	227	2CXQR@1|root,2RZ33@2759|Eukaryota,37V35@33090|Viridiplantae,3GIQN@35493|Streptophyta,4JPPH@91835|fabids	35493|Streptophyta	S	Translocator protein homolog	-	GO:0000139,GO:0001101,GO:0003674,GO:0005488,GO:0005575,GO:0005622,GO:0005623,GO:0005737,GO:0005783,GO:0005789,GO:0005794,GO:0005795,GO:0006725,GO:0006778,GO:0006807,GO:0006950,GO:0006970,GO:0008150,GO:0008152,GO:0009507,GO:0009526,GO:0009536,GO:0009628,GO:0009651,GO:0009719,GO:0009725,GO:0009737,GO:0009941,GO:0009987,GO:0010033,GO:0012505,GO:0016020,GO:0020037,GO:0031090,GO:0031967,GO:0031969,GO:…	-	ko:K05770	ko04080,ko04214,ko04979,ko05166,map04080,map04214,map04979,map05166	-	-	-	ko00000,ko00001,ko02000	9.A.24	-	TspO_MBR
Ssa01000407.t1	4432.XP_010269500.1	1.33e-42	143	2BQ63@1|root,2S1TF@2759|Eukaryota,37WA4@33090|Viridiplantae,3GK5X@35493|Streptophyta	35493|Streptophyta	S	rapid alkalinization	-	-	-	-	-	-	-	-	-	-	-	RALF
Ssa01000408.t1	3983.cassava4.1_007788m	2.03e-257	712	2CMMY@1|root,2QQWZ@2759|Eukaryota,37I8K@33090|Viridiplantae,3G95I@35493|Streptophyta,4JDQ3@91835|fabids	35493|Streptophyta	S	Protein LOW PSII ACCUMULATION 1	-	GO:0005575,GO:0005622,GO:0005623,GO:0005737,GO:0006091,GO:0008150,GO:0008152,GO:0009507,GO:0009536,GO:0009987,GO:0010207,GO:0010270,GO:0015979,GO:0016043,GO:0019684,GO:0022607,GO:0034622,GO:0043226,GO:0043227,GO:0043229,GO:0043231,GO:0043933,GO:0044085,GO:0044237,GO:0044424,GO:0044444,GO:0044464,GO:0065003,GO:0071840	-	-	-	-	-	-	-	-	-	DUF3493,TPR_1,TPR_2
Ssa01000409.t1	3847.GLYMA10G02440.1	0	1015	28KFB@1|root,2QSWB@2759|Eukaryota,37SW4@33090|Viridiplantae,3GXBN@35493|Streptophyta,4JMDR@91835|fabids	35493|Streptophyta	S	Indole-3-acetic acid-amido synthetase	-	GO:0008150,GO:0009314,GO:0009416,GO:0009628,GO:0009719,GO:0009725,GO:0009733,GO:0010033,GO:0042221,GO:0050896	-	ko:K14487	ko04075,map04075	-	-	-	ko00000,ko00001	-	-	GH3
Ssa01000410.t1	3847.GLYMA19G39710.1	1.04e-190	531	COG0190@1|root,KOG0089@2759|Eukaryota,37K6Z@33090|Viridiplantae,3GCGD@35493|Streptophyta,4JHXA@91835|fabids	35493|Streptophyta	H	Bifunctional protein FolD	-	GO:0003674,GO:0003824,GO:0004477,GO:0004488,GO:0005575,GO:0005622,GO:0005623,GO:0005737,GO:0005829,GO:0006082,GO:0006575,GO:0006725,GO:0006730,GO:0006732,GO:0006760,GO:0006807,GO:0008150,GO:0008152,GO:0009507,GO:0009536,GO:0009987,GO:0016491,GO:0016645,GO:0016646,GO:0016787,GO:0016810,GO:0016814,GO:0019219,GO:0019222,GO:0019238,GO:0019752,GO:0031323,GO:0034641,GO:0042558,GO:0043226,GO:0043227,GO:…	-	-	-	-	-	-	-	-	-	THF_DHG_CYH,THF_DHG_CYH_C
Ssa01000411.t1	3847.GLYMA03G37060.2	1.49e-44	161	KOG1603@1|root,KOG1603@2759|Eukaryota,37UTP@33090|Viridiplantae,3GIR8@35493|Streptophyta,4JPMJ@91835|fabids	35493|Streptophyta	P	Heavy-metal-associated domain	-	-	-	-	-	-	-	-	-	-	-	HMA
Ssa01000412.t1	3847.GLYMA02G17330.1	4.33e-120	347	COG0625@1|root,KOG0867@2759|Eukaryota,37N5S@33090|Viridiplantae,3GDH8@35493|Streptophyta,4JHRP@91835|fabids	35493|Streptophyta	O	Belongs to the GST superfamily	-	GO:0003674,GO:0003824,GO:0004364,GO:0005488,GO:0005515,GO:0005575,GO:0005622,GO:0005623,GO:0005737,GO:0006518,GO:0006575,GO:0006749,GO:0006790,GO:0006807,GO:0006950,GO:0008150,GO:0008152,GO:0009056,GO:0009404,GO:0009407,GO:0009635,GO:0009636,GO:0009987,GO:0016740,GO:0016765,GO:0019748,GO:0032991,GO:0034641,GO:0042221,GO:0042802,GO:0042803,GO:0043603,GO:0044237,GO:0044248,GO:0044424,GO:0044464,GO:…	2.5.1.18	ko:K00799	ko00480,ko00980,ko00982,ko00983,ko01524,ko05200,ko05204,ko05225,ko05418,map00480,map00980,map00982,map00983,map01524,map05200,map05204,map05225,map05418	-	R03522,R07002,R07003,R07004,R07023,R07024,R07025,R07026,R07069,R07070,R07083,R07084,R07091,R07092,R07093,R07094,R07100,R07113,R07116,R08280,R09409,R11905	RC00004,RC00069,RC00840,RC00948,RC01704,RC01705,RC01706,RC01758,RC01759,RC01765,RC01767,RC01769,RC02243,RC02527,RC02939,RC02940,RC02942,RC02943,RC02944	ko00000,ko00001,ko01000,ko02000	1.A.12.2.2,1.A.12.3.2	-	GST_C,GST_N
Ssa01000413.t1	3847.GLYMA03G37030.1	1.76e-222	623	KOG2111@1|root,KOG2111@2759|Eukaryota,37QUP@33090|Viridiplantae,3GCWW@35493|Streptophyta,4JEAF@91835|fabids	35493|Streptophyta	S	WD repeat domain phosphoinositide-interacting protein	-	GO:0000045,GO:0000407,GO:0000422,GO:0001101,GO:0003674,GO:0005488,GO:0005543,GO:0005575,GO:0005622,GO:0005623,GO:0005634,GO:0005737,GO:0005829,GO:0006464,GO:0006497,GO:0006807,GO:0006914,GO:0006950,GO:0006952,GO:0006970,GO:0006979,GO:0006996,GO:0007005,GO:0007033,GO:0007275,GO:0007568,GO:0008104,GO:0008150,GO:0008152,GO:0008289,GO:0009056,GO:0009058,GO:0009059,GO:0009414,GO:0009415,GO:0009605,GO:…	-	-	-	-	-	-	-	-	-	WD40
Ssa01000413.t2	3847.GLYMA03G37030.1	1.85e-205	579	KOG2111@1|root,KOG2111@2759|Eukaryota,37QUP@33090|Viridiplantae,3GCWW@35493|Streptophyta,4JEAF@91835|fabids	35493|Streptophyta	S	WD repeat domain phosphoinositide-interacting protein	-	GO:0000045,GO:0000407,GO:0000422,GO:0001101,GO:0003674,GO:0005488,GO:0005543,GO:0005575,GO:0005622,GO:0005623,GO:0005634,GO:0005737,GO:0005829,GO:0006464,GO:0006497,GO:0006807,GO:0006914,GO:0006950,GO:0006952,GO:0006970,GO:0006979,GO:0006996,GO:0007005,GO:0007033,GO:0007275,GO:0007568,GO:0008104,GO:0008150,GO:0008152,GO:0008289,GO:0009056,GO:0009058,GO:0009059,GO:0009414,GO:0009415,GO:0009605,GO:…	-	-	-	-	-	-	-	-	-	WD40
Ssa01000414.t1	3880.AES71744	6.55e-108	336	2C1XZ@1|root,2RYMT@2759|Eukaryota,37TZ3@33090|Viridiplantae,3GH97@35493|Streptophyta,4JQ17@91835|fabids	35493|Streptophyta	-	-	-	-	-	-	-	-	-	-	-	-	-	-
Ssa01000414.t2	3880.AES71744	1.49e-107	336	2C1XZ@1|root,2RYMT@2759|Eukaryota,37TZ3@33090|Viridiplantae,3GH97@35493|Streptophyta,4JQ17@91835|fabids	35493|Streptophyta	-	-	-	-	-	-	-	-	-	-	-	-	-	-
Ssa01000415.t1	3649.evm.TU.contig_29962.2	2.97e-118	351	28KAZ@1|root,2QSRU@2759|Eukaryota,37IE4@33090|Viridiplantae,3G7GK@35493|Streptophyta,3HPZG@3699|Brassicales	35493|Streptophyta	S	Family of unknown function (DUF716)	-	-	-	-	-	-	-	-	-	-	-	DUF716
Ssa01000416.t1	3880.AES78407	1.84e-109	319	KOG3374@1|root,KOG3374@2759|Eukaryota,37PDA@33090|Viridiplantae,3GBIP@35493|Streptophyta,4JK7J@91835|fabids	35493|Streptophyta	K	Pyridoxamine 5'-phosphate oxidase	-	-	-	-	-	-	-	-	-	-	-	Pyrid_oxidase_2
Ssa01000417.t1	981085.XP_010093279.1	0	986	COG0719@1|root,2QRGW@2759|Eukaryota,37JW6@33090|Viridiplantae,3GBIE@35493|Streptophyta,4JJN3@91835|fabids	35493|Streptophyta	O	UPF0051 protein ABCI8	-	GO:0003674,GO:0003824,GO:0005215,GO:0005575,GO:0005622,GO:0005623,GO:0005737,GO:0006810,GO:0006873,GO:0006875,GO:0006879,GO:0008150,GO:0009507,GO:0009532,GO:0009536,GO:0009570,GO:0009987,GO:0015399,GO:0015405,GO:0016462,GO:0016787,GO:0016817,GO:0016818,GO:0016887,GO:0017111,GO:0019725,GO:0022804,GO:0022857,GO:0030003,GO:0042592,GO:0042623,GO:0042626,GO:0043226,GO:0043227,GO:0043229,GO:0043231,GO:…	-	ko:K07033	-	-	-	-	ko00000	-	-	UPF0051
Ssa01000418.t1	102107.XP_008230670.1	0	1102	KOG1990@1|root,KOG1990@2759|Eukaryota,37M2P@33090|Viridiplantae,3GCYI@35493|Streptophyta,4JHMK@91835|fabids	35493|Streptophyta	L	Chloroplastic group IIA intron splicing facilitator CRS1	-	GO:0000372,GO:0000373,GO:0000375,GO:0000376,GO:0000377,GO:0005575,GO:0005622,GO:0005623,GO:0005737,GO:0006139,GO:0006396,GO:0006725,GO:0006807,GO:0008150,GO:0008152,GO:0008380,GO:0009507,GO:0009532,GO:0009536,GO:0009987,GO:0010467,GO:0016070,GO:0034641,GO:0043170,GO:0043226,GO:0043227,GO:0043229,GO:0043231,GO:0044237,GO:0044238,GO:0044422,GO:0044424,GO:0044435,GO:0044444,GO:0044446,GO:0044464,GO:…	-	-	-	-	-	-	-	-	-	CRS1_YhbY
Ssa01000419.t1	3847.GLYMA13G04640.2	4.78e-90	265	COG4802@1|root,2RZRI@2759|Eukaryota,37UHT@33090|Viridiplantae,3GI8B@35493|Streptophyta,4JNZW@91835|fabids	35493|Streptophyta	C	Catalytic subunit of the ferredoxin-thioredoxin reductase (FTR), which catalyzes the two-electron reduction of thioredoxins by the electrons provided by reduced ferredoxin	-	GO:0003674,GO:0003824,GO:0005488,GO:0005575,GO:0005622,GO:0005623,GO:0005737,GO:0006091,GO:0008150,GO:0008152,GO:0009055,GO:0009507,GO:0009526,GO:0009532,GO:0009536,GO:0009570,GO:0009941,GO:0009987,GO:0016491,GO:0016730,GO:0022900,GO:0030385,GO:0031967,GO:0031975,GO:0043226,GO:0043227,GO:0043229,GO:0043231,GO:0044237,GO:0044422,GO:0044424,GO:0044434,GO:0044435,GO:0044444,GO:0044446,GO:0044464,GO:…	1.8.7.2	ko:K17892	-	-	-	-	ko00000,ko01000	-	-	FeThRed_B
Ssa01000419.t2	3885.XP_007151131.1	1.68e-70	213	COG4802@1|root,2RZRI@2759|Eukaryota,37UHT@33090|Viridiplantae,3GI8B@35493|Streptophyta,4JNZW@91835|fabids	35493|Streptophyta	C	Catalytic subunit of the ferredoxin-thioredoxin reductase (FTR), which catalyzes the two-electron reduction of thioredoxins by the electrons provided by reduced ferredoxin	-	GO:0003674,GO:0003824,GO:0005488,GO:0005575,GO:0005622,GO:0005623,GO:0005737,GO:0006091,GO:0008150,GO:0008152,GO:0009055,GO:0009507,GO:0009526,GO:0009532,GO:0009536,GO:0009570,GO:0009941,GO:0009987,GO:0016491,GO:0016730,GO:0022900,GO:0030385,GO:0031967,GO:0031975,GO:0043226,GO:0043227,GO:0043229,GO:0043231,GO:0044237,GO:0044422,GO:0044424,GO:0044434,GO:0044435,GO:0044444,GO:0044446,GO:0044464,GO:…	1.8.7.2	ko:K17892	-	-	-	-	ko00000,ko01000	-	-	FeThRed_B
Ssa01000420.t1	102107.XP_008230668.1	1.82e-51	177	KOG4374@1|root,KOG4374@2759|Eukaryota,37VBD@33090|Viridiplantae,3GIW3@35493|Streptophyta,4JU3G@91835|fabids	35493|Streptophyta	A	SAM domain (Sterile alpha motif)	-	-	-	ko:K18756	-	-	-	-	ko00000,ko03019	-	-	SAM_1
Ssa01000421.t1	3847.GLYMA13G04630.1	4.76e-88	263	KOG3183@1|root,KOG3183@2759|Eukaryota,37TZG@33090|Viridiplantae,3GHZY@35493|Streptophyta,4JP2Q@91835|fabids	35493|Streptophyta	S	Zinc finger AN1 domain-containing stress-associated protein	-	GO:0001101,GO:0008150,GO:0009719,GO:0009725,GO:0009737,GO:0010033,GO:0010200,GO:0010243,GO:0033993,GO:0042221,GO:0042493,GO:0050896,GO:0097305,GO:1901698,GO:1901700	-	-	-	-	-	-	-	-	-	zf-AN1
Ssa01000422.t1	57918.XP_004296565.1	1.65e-107	340	28H73@1|root,2QPJU@2759|Eukaryota,37NCW@33090|Viridiplantae,3G9W6@35493|Streptophyta,4JHK1@91835|fabids	35493|Streptophyta	O	RING-type E3 ubiquitin transferase	-	GO:0005575,GO:0005622,GO:0005623,GO:0005634,GO:0005737,GO:0043226,GO:0043227,GO:0043229,GO:0043231,GO:0044424,GO:0044464	-	ko:K08332,ko:K22499	ko04934,map04934	-	-	-	ko00000,ko00001,ko03029,ko04131	-	-	Arm,U-box
Ssa01000423.t1	3760.EMJ16866	5.78e-174	492	2C0PQ@1|root,2QR74@2759|Eukaryota,37M6C@33090|Viridiplantae,3GD7A@35493|Streptophyta,4JG8H@91835|fabids	35493|Streptophyta	W	Removal of H(2)O(2), oxidation of toxic reductants, biosynthesis and degradation of lignin, suberization, auxin catabolism, response to environmental stresses such as wounding, pathogen attack and oxidative stress	-	GO:0005575,GO:0005618,GO:0005622,GO:0005623,GO:0005737,GO:0005829,GO:0009505,GO:0030312,GO:0044424,GO:0044444,GO:0044464,GO:0071944	1.11.1.7	ko:K00430	ko00940,ko01100,ko01110,map00940,map01100,map01110	-	R00602,R02596,R03919,R04007,R07443	RC00034	ko00000,ko00001,ko01000	-	-	peroxidase
Ssa01000424.t1	3847.GLYMA19G01605.1	2.69e-169	500	28M3M@1|root,2QTKG@2759|Eukaryota,37MSA@33090|Viridiplantae,3GH3R@35493|Streptophyta,4JKSU@91835|fabids	35493|Streptophyta	S	Senescence-associated carboxylesterase 101-like	-	-	-	-	-	-	-	-	-	-	-	Lipase_3
Ssa01000425.t1	3847.GLYMA01G16526.3	0	1647	COG1524@1|root,KOG2124@2759|Eukaryota,37SNT@33090|Viridiplantae,3G9IR@35493|Streptophyta,4JMCY@91835|fabids	35493|Streptophyta	T	GPI ethanolamine phosphate transferase	-	-	-	ko:K05285	ko00563,ko01100,map00563,map01100	M00065	R05920	RC00017	ko00000,ko00001,ko00002,ko01000	-	-	Phosphodiest,PigN,Sulfatase
Ssa01000426.t1	3847.GLYMA13G04530.1	1.58e-41	144	2A83I@1|root,2RYFP@2759|Eukaryota,37TV8@33090|Viridiplantae,3GJTP@35493|Streptophyta,4JTVJ@91835|fabids	35493|Streptophyta	S	Gibberellin regulated protein	-	-	-	-	-	-	-	-	-	-	-	GASA
Ssa01000427.t1	3885.XP_007151124.1	6.02e-53	173	2BUGU@1|root,2S239@2759|Eukaryota,37VD8@33090|Viridiplantae,3GJJA@35493|Streptophyta,4JQ61@91835|fabids	35493|Streptophyta	S	heavy metal transport detoxification superfamily protein	-	-	-	-	-	-	-	-	-	-	-	-
Ssa01000428.t1	3847.GLYMA13G04491.2	2.51e-127	370	COG0328@1|root,2S89Z@2759|Eukaryota,37WKD@33090|Viridiplantae	33090|Viridiplantae	L	RNase H	-	-	-	-	-	-	-	-	-	-	-	Cauli_VI,RVT_3
Ssa01000428.t2	3847.GLYMA13G04491.2	4.91e-110	326	COG0328@1|root,2S89Z@2759|Eukaryota,37WKD@33090|Viridiplantae	33090|Viridiplantae	L	RNase H	-	-	-	-	-	-	-	-	-	-	-	Cauli_VI,RVT_3
Ssa01000429.t1	3847.GLYMA13G04480.1	0	1160	COG1215@1|root,2QTBF@2759|Eukaryota,37J3S@33090|Viridiplantae,3G8DH@35493|Streptophyta,4JJ4Y@91835|fabids	35493|Streptophyta	M	Xyloglucan glycosyltransferase 4-like	-	GO:0003674,GO:0005488,GO:0005515,GO:0005575,GO:0005622,GO:0005623,GO:0005737,GO:0005768,GO:0005794,GO:0005802,GO:0005886,GO:0012505,GO:0016020,GO:0031410,GO:0031982,GO:0031984,GO:0042802,GO:0042803,GO:0043226,GO:0043227,GO:0043229,GO:0043231,GO:0044422,GO:0044424,GO:0044431,GO:0044444,GO:0044446,GO:0044464,GO:0046983,GO:0071944,GO:0097708,GO:0098791	-	ko:K20887	-	-	-	-	ko00000,ko01000,ko01003	-	GT2	Glyco_tranf_2_3,Glyco_trans_2_3
Ssa01000431.t1	3827.XP_004489321.1	0	1941	KOG1886@1|root,KOG1886@2759|Eukaryota,37NNT@33090|Viridiplantae,3GAJY@35493|Streptophyta,4JM8V@91835|fabids	35493|Streptophyta	K	TFIIS helical bundle-like domain	-	-	2.7.11.1	ko:K04733	ko04010,ko04064,ko04620,ko04621,ko04624,ko04722,ko05133,ko05140,ko05142,ko05145,ko05152,ko05162,ko05164,map04010,map04064,map04620,map04621,map04624,map04722,map05133,map05140,map05142,map05145,map05152,map05162,map05164	M00686	-	-	ko00000,ko00001,ko00002,ko01000,ko01001	-	-	BAH,Med26
Ssa01000432.t1	3885.XP_007151116.1	2.07e-202	573	28K4X@1|root,2QPJ5@2759|Eukaryota,37KDK@33090|Viridiplantae,3GBMJ@35493|Streptophyta,4JJK4@91835|fabids	35493|Streptophyta	S	Protein ALTERED XYLOGLUCAN 4-like	-	GO:0003674,GO:0003824,GO:0005575,GO:0005622,GO:0005623,GO:0005737,GO:0005794,GO:0005975,GO:0005976,GO:0006073,GO:0008150,GO:0008152,GO:0008374,GO:0009987,GO:0010383,GO:0010410,GO:0010411,GO:0012505,GO:0016407,GO:0016413,GO:0016740,GO:0016746,GO:0016747,GO:0043170,GO:0043226,GO:0043227,GO:0043229,GO:0043231,GO:0044036,GO:0044042,GO:0044237,GO:0044238,GO:0044260,GO:0044262,GO:0044264,GO:0044424,GO:…	-	-	-	-	-	-	-	-	-	PC-Esterase,PMR5N
Ssa01000433.t1	3988.XP_002517378.1	4.7e-109	316	28HIV@1|root,2QPWQ@2759|Eukaryota,37R0C@33090|Viridiplantae,3GG3N@35493|Streptophyta,4JK4Q@91835|fabids	35493|Streptophyta	S	2'-5' RNA ligase superfamily	-	-	-	-	-	-	-	-	-	-	-	2_5_RNA_ligase2
Ssa01000434.t1	3885.XP_007140930.1	5.04e-301	833	COG0265@1|root,KOG1320@2759|Eukaryota,37JRX@33090|Viridiplantae,3GEAY@35493|Streptophyta,4JRX9@91835|fabids	35493|Streptophyta	O	Protease Do-like 9	-	GO:0003674,GO:0003824,GO:0005575,GO:0005622,GO:0005623,GO:0005634,GO:0005730,GO:0005737,GO:0006508,GO:0006807,GO:0008150,GO:0008152,GO:0008233,GO:0008236,GO:0009507,GO:0009536,GO:0016787,GO:0017171,GO:0019538,GO:0031974,GO:0031981,GO:0043170,GO:0043226,GO:0043227,GO:0043228,GO:0043229,GO:0043231,GO:0043232,GO:0043233,GO:0044238,GO:0044422,GO:0044424,GO:0044428,GO:0044444,GO:0044446,GO:0044464,GO:…	-	-	-	-	-	-	-	-	-	PDZ_2,Trypsin_2
Ssa01000435.t1	981085.XP_010111735.1	0	886	COG0265@1|root,KOG1320@2759|Eukaryota,37JRX@33090|Viridiplantae,3GEAY@35493|Streptophyta,4JRX9@91835|fabids	35493|Streptophyta	O	Protease Do-like 9	-	GO:0003674,GO:0003824,GO:0005575,GO:0005622,GO:0005623,GO:0005634,GO:0005730,GO:0005737,GO:0006508,GO:0006807,GO:0008150,GO:0008152,GO:0008233,GO:0008236,GO:0009507,GO:0009536,GO:0016787,GO:0017171,GO:0019538,GO:0031974,GO:0031981,GO:0043170,GO:0043226,GO:0043227,GO:0043228,GO:0043229,GO:0043231,GO:0043232,GO:0043233,GO:0044238,GO:0044422,GO:0044424,GO:0044428,GO:0044444,GO:0044446,GO:0044464,GO:…	-	-	-	-	-	-	-	-	-	PDZ_2,Trypsin_2
Ssa01000436.t1	3885.XP_007140921.1	7.5e-190	537	KOG0800@1|root,KOG0800@2759|Eukaryota,37QEK@33090|Viridiplantae,3G84U@35493|Streptophyta,4JCYV@91835|fabids	35493|Streptophyta	O	RING-H2 finger protein	-	GO:0003674,GO:0003824,GO:0004842,GO:0006464,GO:0006508,GO:0006511,GO:0006807,GO:0008150,GO:0008152,GO:0009056,GO:0009057,GO:0009987,GO:0010498,GO:0016567,GO:0016740,GO:0019538,GO:0019787,GO:0019941,GO:0030163,GO:0032446,GO:0036211,GO:0043161,GO:0043170,GO:0043412,GO:0043632,GO:0044237,GO:0044238,GO:0044248,GO:0044257,GO:0044260,GO:0044265,GO:0044267,GO:0051603,GO:0061630,GO:0061659,GO:0070647,GO:…	2.3.2.27	ko:K19041	-	-	-	-	ko00000,ko01000,ko04121	-	-	zf-RING_2
Ssa01000436.t3	3641.EOY02339	1.32e-95	291	KOG0800@1|root,KOG0800@2759|Eukaryota,37QEK@33090|Viridiplantae,3G84U@35493|Streptophyta	35493|Streptophyta	O	RING-H2 finger protein	-	GO:0003674,GO:0003824,GO:0004842,GO:0006464,GO:0006508,GO:0006511,GO:0006807,GO:0008150,GO:0008152,GO:0009056,GO:0009057,GO:0009987,GO:0010498,GO:0016567,GO:0016740,GO:0019538,GO:0019787,GO:0019941,GO:0030163,GO:0032446,GO:0036211,GO:0043161,GO:0043170,GO:0043412,GO:0043632,GO:0044237,GO:0044238,GO:0044248,GO:0044257,GO:0044260,GO:0044265,GO:0044267,GO:0051603,GO:0061630,GO:0061659,GO:0070647,GO:…	2.3.2.27	ko:K19041	-	-	-	-	ko00000,ko01000,ko04121	-	-	zf-RING_2
Ssa01000437.t1	102107.XP_008230633.1	7.32e-49	161	2CYBA@1|root,2S4NQ@2759|Eukaryota,37W8Z@33090|Viridiplantae,3GK9F@35493|Streptophyta,4JQJT@91835|fabids	35493|Streptophyta	-	-	-	-	-	-	-	-	-	-	-	-	-	-
Ssa01000438.t1	3885.XP_007140919.1	0	1364	COG3158@1|root,2QPSA@2759|Eukaryota,37NM3@33090|Viridiplantae,3G8B6@35493|Streptophyta,4JKUH@91835|fabids	35493|Streptophyta	P	Potassium transporter	HAK25	GO:0003674,GO:0005215,GO:0005575,GO:0005623,GO:0005886,GO:0006810,GO:0006811,GO:0006812,GO:0006813,GO:0008150,GO:0008324,GO:0009987,GO:0015075,GO:0015077,GO:0015079,GO:0015318,GO:0015672,GO:0016020,GO:0022857,GO:0022890,GO:0030001,GO:0034220,GO:0044464,GO:0046873,GO:0051179,GO:0051234,GO:0055085,GO:0071804,GO:0071805,GO:0071944,GO:0098655,GO:0098660,GO:0098662	-	ko:K03549	-	-	-	-	ko00000,ko02000	2.A.72	-	K_trans
Ssa01000439.t1	3847.GLYMA13G23950.1	0	924	COG1012@1|root,KOG2450@2759|Eukaryota	2759|Eukaryota	C	aldehyde dehydrogenase (NAD) activity	ALDH1A2	GO:0000003,GO:0000166,GO:0001101,GO:0001523,GO:0001568,GO:0001654,GO:0001655,GO:0001756,GO:0001758,GO:0001822,GO:0001889,GO:0001936,GO:0001944,GO:0001947,GO:0002009,GO:0002072,GO:0002138,GO:0002237,GO:0003002,GO:0003007,GO:0003008,GO:0003143,GO:0003674,GO:0003824,GO:0004028,GO:0004029,GO:0004030,GO:0004745,GO:0005096,GO:0005488,GO:0005497,GO:0005501,GO:0005515,GO:0005575,GO:0005622,GO:0005623,GO:…	1.2.1.3,1.2.1.36,1.2.1.5,1.2.1.68	ko:K00128,ko:K00129,ko:K07249,ko:K12355	ko00010,ko00053,ko00071,ko00280,ko00310,ko00330,ko00340,ko00350,ko00360,ko00380,ko00410,ko00561,ko00620,ko00625,ko00830,ko00903,ko00940,ko00980,ko00981,ko00982,ko01100,ko01110,ko01120,ko01130,ko05204,map00010,map00053,map00071,map00280,map00310,map00330,map00340,map00350,map00360,map00380,map00410,map00561,map00620,map00625,map00830,map00903,map00940,map00980,map00981,map00982,map01100,map01110,m…	M00135	R00264,R00631,R00710,R00711,R00904,R01752,R01986,R02123,R02536,R02537,R02549,R02678,R02695,R02697,R02940,R02957,R03283,R03300,R03302,R03869,R04065,R04506,R04882,R04883,R04888,R04889,R04891,R04892,R04903,R04996,R05050,R05237,R05238,R05286,R05700,R05701,R06366,R07104,R07441,R07442,R08146,R08282,R08283,R08307,R08385	RC00047,RC00071,RC00080,RC00186,RC00218,RC00242,RC00816,RC01500,RC01735	ko00000,ko00001,ko00002,ko01000	-	-	Aldedh
Ssa01000440.t1	3847.GLYMA19G01381.1	1.55e-187	537	COG0515@1|root,KOG1187@2759|Eukaryota,37NQY@33090|Viridiplantae,3G82Q@35493|Streptophyta,4JW6Z@91835|fabids	35493|Streptophyta	T	Protein kinase domain	-	-	-	-	-	-	-	-	-	-	-	Pkinase,Pkinase_Tyr
Ssa01000441.t1	29760.VIT_14s0066g01530.t01	4.86e-21	85.1	KOG4764@1|root,KOG4764@2759|Eukaryota,37W62@33090|Viridiplantae,3GK7X@35493|Streptophyta	35493|Streptophyta	S	26S proteasome complex subunit	-	-	-	ko:K10881	ko03050,ko03440,ko05169,map03050,map03440,map05169	M00341	-	-	ko00000,ko00001,ko00002,ko03051,ko03400,ko04131	-	-	DSS1_SEM1
Ssa01000443.t1	3827.XP_004489299.1	4.3e-173	490	KOG2933@1|root,KOG2933@2759|Eukaryota,37PES@33090|Viridiplantae,3GC3X@35493|Streptophyta,4JEB2@91835|fabids	35493|Streptophyta	S	CLASP N terminal	-	-	-	-	-	-	-	-	-	-	-	CLASP_N
Ssa01000444.t1	3827.XP_004489298.1	1.08e-93	285	KOG0483@1|root,KOG0483@2759|Eukaryota,37SWT@33090|Viridiplantae,3GB6E@35493|Streptophyta,4JJAC@91835|fabids	35493|Streptophyta	K	Homeobox-leucine zipper protein	hb-1	GO:0003674,GO:0003676,GO:0003677,GO:0003700,GO:0005488,GO:0005515,GO:0005575,GO:0005622,GO:0005623,GO:0005634,GO:0006355,GO:0006417,GO:0006950,GO:0006970,GO:0007275,GO:0008150,GO:0009314,GO:0009416,GO:0009628,GO:0009637,GO:0009651,GO:0009653,GO:0009889,GO:0009890,GO:0009891,GO:0009892,GO:0009893,GO:0009965,GO:0010016,GO:0010468,GO:0010556,GO:0010557,GO:0010558,GO:0010604,GO:0010605,GO:0010608,GO:…	-	ko:K09338	-	-	-	-	ko00000,ko03000	-	-	HALZ,Homeobox
Ssa01000444.t2	3827.XP_004489298.1	4.12e-103	309	KOG0483@1|root,KOG0483@2759|Eukaryota,37SWT@33090|Viridiplantae,3GB6E@35493|Streptophyta,4JJAC@91835|fabids	35493|Streptophyta	K	Homeobox-leucine zipper protein	hb-1	GO:0003674,GO:0003676,GO:0003677,GO:0003700,GO:0005488,GO:0005515,GO:0005575,GO:0005622,GO:0005623,GO:0005634,GO:0006355,GO:0006417,GO:0006950,GO:0006970,GO:0007275,GO:0008150,GO:0009314,GO:0009416,GO:0009628,GO:0009637,GO:0009651,GO:0009653,GO:0009889,GO:0009890,GO:0009891,GO:0009892,GO:0009893,GO:0009965,GO:0010016,GO:0010468,GO:0010556,GO:0010557,GO:0010558,GO:0010604,GO:0010605,GO:0010608,GO:…	-	ko:K09338	-	-	-	-	ko00000,ko03000	-	-	HALZ,Homeobox
Ssa01000446.t1	3885.XP_007151093.1	4.7e-115	336	KOG1623@1|root,KOG1623@2759|Eukaryota,37JKT@33090|Viridiplantae,3GA1H@35493|Streptophyta,4JNKE@91835|fabids	35493|Streptophyta	U	Mediates both low-affinity uptake and efflux of sugar across the membrane	-	GO:0003674,GO:0005215,GO:0005575,GO:0005623,GO:0005886,GO:0005887,GO:0006810,GO:0008150,GO:0008643,GO:0015144,GO:0016020,GO:0016021,GO:0022857,GO:0031224,GO:0031226,GO:0034219,GO:0044425,GO:0044459,GO:0044464,GO:0051119,GO:0051179,GO:0051234,GO:0055085,GO:0071702,GO:0071944	-	ko:K15382	-	-	-	-	ko00000,ko02000	9.A.58.1	-	MtN3_slv
Ssa01000447.t1	3847.GLYMA13G23850.1	5.96e-274	755	COG0652@1|root,2QSSP@2759|Eukaryota,37JGM@33090|Viridiplantae,3G9N2@35493|Streptophyta,4JGH9@91835|fabids	35493|Streptophyta	O	Peptidyl-prolyl cis-trans isomerase	-	GO:0005575,GO:0005622,GO:0005623,GO:0005737,GO:0006950,GO:0006952,GO:0008150,GO:0009507,GO:0009532,GO:0009534,GO:0009535,GO:0009536,GO:0009570,GO:0009579,GO:0009605,GO:0009607,GO:0009617,GO:0016020,GO:0031976,GO:0031977,GO:0031984,GO:0034357,GO:0042651,GO:0042742,GO:0043207,GO:0043226,GO:0043227,GO:0043229,GO:0043231,GO:0044422,GO:0044424,GO:0044434,GO:0044435,GO:0044436,GO:0044444,GO:0044446,GO:…	-	-	-	-	-	-	-	-	-	Pro_isomerase
Ssa01000447.t2	3847.GLYMA13G23850.1	6.99e-275	757	COG0652@1|root,2QSSP@2759|Eukaryota,37JGM@33090|Viridiplantae,3G9N2@35493|Streptophyta,4JGH9@91835|fabids	35493|Streptophyta	O	Peptidyl-prolyl cis-trans isomerase	-	GO:0005575,GO:0005622,GO:0005623,GO:0005737,GO:0006950,GO:0006952,GO:0008150,GO:0009507,GO:0009532,GO:0009534,GO:0009535,GO:0009536,GO:0009570,GO:0009579,GO:0009605,GO:0009607,GO:0009617,GO:0016020,GO:0031976,GO:0031977,GO:0031984,GO:0034357,GO:0042651,GO:0042742,GO:0043207,GO:0043226,GO:0043227,GO:0043229,GO:0043231,GO:0044422,GO:0044424,GO:0044434,GO:0044435,GO:0044436,GO:0044444,GO:0044446,GO:…	-	-	-	-	-	-	-	-	-	Pro_isomerase
Ssa01000448.t2	3847.GLYMA19G01250.1	1.33e-253	697	COG0515@1|root,KOG0192@2759|Eukaryota,37MFU@33090|Viridiplantae,3G8KT@35493|Streptophyta,4JM23@91835|fabids	35493|Streptophyta	T	Serine threonine-protein kinase	-	GO:0003674,GO:0003824,GO:0004672,GO:0005575,GO:0005622,GO:0005623,GO:0005737,GO:0006464,GO:0006468,GO:0006793,GO:0006796,GO:0006807,GO:0007154,GO:0007165,GO:0008150,GO:0008152,GO:0009987,GO:0016301,GO:0016310,GO:0016740,GO:0016772,GO:0016773,GO:0019538,GO:0023052,GO:0035556,GO:0036211,GO:0043170,GO:0043412,GO:0044237,GO:0044238,GO:0044260,GO:0044267,GO:0044424,GO:0044464,GO:0050789,GO:0050794,GO:…	-	-	-	-	-	-	-	-	-	Pkinase_Tyr
Ssa01000448.t1	3847.GLYMA19G01250.1	5.32e-253	696	COG0515@1|root,KOG0192@2759|Eukaryota,37MFU@33090|Viridiplantae,3G8KT@35493|Streptophyta,4JM23@91835|fabids	35493|Streptophyta	T	Serine threonine-protein kinase	-	GO:0003674,GO:0003824,GO:0004672,GO:0005575,GO:0005622,GO:0005623,GO:0005737,GO:0006464,GO:0006468,GO:0006793,GO:0006796,GO:0006807,GO:0007154,GO:0007165,GO:0008150,GO:0008152,GO:0009987,GO:0016301,GO:0016310,GO:0016740,GO:0016772,GO:0016773,GO:0019538,GO:0023052,GO:0035556,GO:0036211,GO:0043170,GO:0043412,GO:0044237,GO:0044238,GO:0044260,GO:0044267,GO:0044424,GO:0044464,GO:0050789,GO:0050794,GO:…	-	-	-	-	-	-	-	-	-	Pkinase_Tyr
Ssa01000449.t3	3847.GLYMA19G01240.2	6.35e-279	770	COG1078@1|root,KOG2681@2759|Eukaryota,37I91@33090|Viridiplantae,3GFTY@35493|Streptophyta,4JFD4@91835|fabids	35493|Streptophyta	S	Deoxynucleoside triphosphate triphosphohydrolase SAMHD1 homolog	-	-	-	-	-	-	-	-	-	-	-	HD
Ssa01000449.t2	3847.GLYMA19G01240.2	2e-279	774	COG1078@1|root,KOG2681@2759|Eukaryota,37I91@33090|Viridiplantae,3GFTY@35493|Streptophyta,4JFD4@91835|fabids	35493|Streptophyta	S	Deoxynucleoside triphosphate triphosphohydrolase SAMHD1 homolog	-	-	-	-	-	-	-	-	-	-	-	HD
Ssa01000449.t1	3847.GLYMA19G01240.2	1.68e-279	771	COG1078@1|root,KOG2681@2759|Eukaryota,37I91@33090|Viridiplantae,3GFTY@35493|Streptophyta,4JFD4@91835|fabids	35493|Streptophyta	S	Deoxynucleoside triphosphate triphosphohydrolase SAMHD1 homolog	-	-	-	-	-	-	-	-	-	-	-	HD
Ssa01000449.t4	3885.XP_007151087.1	5.39e-287	790	COG1078@1|root,KOG2681@2759|Eukaryota,37I91@33090|Viridiplantae,3GFTY@35493|Streptophyta,4JFD4@91835|fabids	35493|Streptophyta	S	Deoxynucleoside triphosphate triphosphohydrolase SAMHD1 homolog	-	-	-	-	-	-	-	-	-	-	-	HD
Ssa01000450.t1	3827.XP_004489286.1	5.31e-249	687	COG1052@1|root,KOG0069@2759|Eukaryota,37HMJ@33090|Viridiplantae,3GD7U@35493|Streptophyta,4JSEJ@91835|fabids	35493|Streptophyta	C	Catalyzes the NAD( )-dependent oxidation of formate to carbon dioxide. Involved in the cell stress response	FDH1	GO:0005575,GO:0005622,GO:0005623,GO:0005737,GO:0005739,GO:0008150,GO:0009507,GO:0009536,GO:0009579,GO:0010035,GO:0010038,GO:0042221,GO:0043226,GO:0043227,GO:0043229,GO:0043231,GO:0044424,GO:0044444,GO:0044464,GO:0046686,GO:0050896	1.17.1.9	ko:K00122	ko00630,ko00680,ko01100,ko01120,ko01200,map00630,map00680,map01100,map01120,map01200	-	R00519	RC02796	ko00000,ko00001,ko01000	-	-	2-Hacid_dh,2-Hacid_dh_C
Ssa01000451.t2	3885.XP_007140955.1	1.41e-91	286	2CNGS@1|root,2QW75@2759|Eukaryota,37PCG@33090|Viridiplantae,3GF6Q@35493|Streptophyta,4JPEM@91835|fabids	35493|Streptophyta	S	Belongs to the Casparian strip membrane proteins (CASP) family	-	GO:0003674,GO:0005488,GO:0005575,GO:0005623,GO:0005886,GO:0016020,GO:0044464,GO:0048037,GO:0051536,GO:0051540,GO:0071944	-	-	-	-	-	-	-	-	-	DUF588
Ssa01000451.t1	3885.XP_007140955.1	1.71e-92	286	2CNGS@1|root,2QW75@2759|Eukaryota,37PCG@33090|Viridiplantae,3GF6Q@35493|Streptophyta,4JPEM@91835|fabids	35493|Streptophyta	S	Belongs to the Casparian strip membrane proteins (CASP) family	-	GO:0003674,GO:0005488,GO:0005575,GO:0005623,GO:0005886,GO:0016020,GO:0044464,GO:0048037,GO:0051536,GO:0051540,GO:0071944	-	-	-	-	-	-	-	-	-	DUF588
Ssa01000452.t1	3847.GLYMA16G08040.1	8.1e-185	519	COG0604@1|root,KOG1198@2759|Eukaryota,37YIP@33090|Viridiplantae,3GNVB@35493|Streptophyta,4JS5E@91835|fabids	35493|Streptophyta	C	Zinc-binding dehydrogenase	-	-	1.3.1.105	ko:K18980	-	-	-	-	ko00000,ko01000	-	-	ADH_N,ADH_zinc_N_2
Ssa01000453.t1	102107.XP_008230608.1	1.57e-225	624	COG0847@1|root,KOG2249@2759|Eukaryota,37KIS@33090|Viridiplantae,3GBXD@35493|Streptophyta,4JH1W@91835|fabids	35493|Streptophyta	L	RNA exonuclease	-	GO:0000027,GO:0003674,GO:0003824,GO:0004518,GO:0004527,GO:0006139,GO:0006364,GO:0006396,GO:0006725,GO:0006807,GO:0006996,GO:0008150,GO:0008152,GO:0008408,GO:0009987,GO:0010467,GO:0016043,GO:0016070,GO:0016072,GO:0016787,GO:0016788,GO:0022607,GO:0022613,GO:0022618,GO:0034470,GO:0034622,GO:0034641,GO:0034660,GO:0042254,GO:0042255,GO:0042273,GO:0043170,GO:0043933,GO:0044085,GO:0044237,GO:0044238,GO:…	-	ko:K18327	-	-	-	-	ko00000,ko01000,ko03009	-	-	RNase_T
Ssa01000454.t1	3847.GLYMA19G01100.1	0	1099	COG0457@1|root,KOG1840@2759|Eukaryota,37T4D@33090|Viridiplantae,3GH9Q@35493|Streptophyta,4JSJQ@91835|fabids	35493|Streptophyta	Z	Tetratricopeptide repeat	-	GO:0000003,GO:0000902,GO:0000904,GO:0001655,GO:0001822,GO:0001889,GO:0001894,GO:0001895,GO:0001947,GO:0002009,GO:0003006,GO:0003007,GO:0003143,GO:0003205,GO:0003230,GO:0003279,GO:0003283,GO:0003341,GO:0003351,GO:0005575,GO:0005622,GO:0005623,GO:0005737,GO:0005829,GO:0005886,GO:0005929,GO:0006928,GO:0006996,GO:0007017,GO:0007018,GO:0007275,GO:0007368,GO:0007369,GO:0007389,GO:0007507,GO:0008150,GO:…	-	-	-	-	-	-	-	-	-	TPR_10,TPR_12,TPR_7,TPR_8
Ssa01000455.t1	3885.XP_007151046.1	1.95e-200	563	28K72@1|root,2QQSM@2759|Eukaryota,37PTC@33090|Viridiplantae,3GGYE@35493|Streptophyta,4JEES@91835|fabids	35493|Streptophyta	S	Belongs to the 'GDSL' lipolytic enzyme family	-	GO:0005575,GO:0005618,GO:0005623,GO:0005911,GO:0009505,GO:0009506,GO:0030054,GO:0030312,GO:0044464,GO:0055044,GO:0071944	-	-	-	-	-	-	-	-	-	Lipase_GDSL
Ssa01000457.t1	3885.XP_007151046.1	3.26e-210	588	28K72@1|root,2QQSM@2759|Eukaryota,37PTC@33090|Viridiplantae,3GGYE@35493|Streptophyta,4JEES@91835|fabids	35493|Streptophyta	S	Belongs to the 'GDSL' lipolytic enzyme family	-	GO:0005575,GO:0005618,GO:0005623,GO:0005911,GO:0009505,GO:0009506,GO:0030054,GO:0030312,GO:0044464,GO:0055044,GO:0071944	-	-	-	-	-	-	-	-	-	Lipase_GDSL
Ssa01000458.t1	3847.GLYMA05G08550.1	0	1046	COG1053@1|root,KOG2403@2759|Eukaryota,37PCA@33090|Viridiplantae,3G9AT@35493|Streptophyta,4JK9R@91835|fabids	35493|Streptophyta	C	Catalyzes the oxidation of L-aspartate to iminoaspartate	AO	GO:0005575,GO:0005622,GO:0005623,GO:0005737,GO:0006139,GO:0006725,GO:0006732,GO:0006733,GO:0006753,GO:0006793,GO:0006796,GO:0006807,GO:0008150,GO:0008152,GO:0009058,GO:0009108,GO:0009117,GO:0009165,GO:0009435,GO:0009507,GO:0009536,GO:0009987,GO:0018130,GO:0019359,GO:0019362,GO:0019363,GO:0019438,GO:0019637,GO:0019674,GO:0034641,GO:0034654,GO:0043226,GO:0043227,GO:0043229,GO:0043231,GO:0044237,GO:…	1.4.3.16	ko:K00278	ko00250,ko00760,ko01100,map00250,map00760,map01100	M00115	R00357,R00481	RC00006,RC02566	ko00000,ko00001,ko00002,ko01000	-	-	FAD_binding_2,Succ_DH_flav_C
Ssa01000459.t1	102107.XP_008230601.1	5.98e-237	660	COG0265@1|root,KOG1320@2759|Eukaryota,37NI3@33090|Viridiplantae,3G8QG@35493|Streptophyta,4JI9J@91835|fabids	35493|Streptophyta	O	Protease Do-like 1	-	GO:0003674,GO:0003824,GO:0004175,GO:0004252,GO:0005488,GO:0005515,GO:0005575,GO:0005622,GO:0005623,GO:0005634,GO:0005737,GO:0006091,GO:0006508,GO:0006807,GO:0008150,GO:0008152,GO:0008233,GO:0008236,GO:0009056,GO:0009057,GO:0009507,GO:0009534,GO:0009535,GO:0009536,GO:0009579,GO:0009719,GO:0009725,GO:0009735,GO:0009765,GO:0009987,GO:0010033,GO:0010206,GO:0015979,GO:0016020,GO:0016787,GO:0017171,GO:…	-	-	-	-	-	-	-	-	-	PDZ_2,Trypsin_2
Ssa01000460.t2	3885.XP_007151035.1	4.2e-173	491	COG0288@1|root,KOG1578@2759|Eukaryota,37QMN@33090|Viridiplantae,3GAY4@35493|Streptophyta,4JGSV@91835|fabids	35493|Streptophyta	P	Reversible hydration of carbon dioxide	-	GO:0002376,GO:0003674,GO:0003824,GO:0004089,GO:0005575,GO:0005576,GO:0005622,GO:0005623,GO:0005737,GO:0005829,GO:0005886,GO:0006950,GO:0006952,GO:0006955,GO:0008150,GO:0008152,GO:0009266,GO:0009409,GO:0009507,GO:0009526,GO:0009532,GO:0009534,GO:0009535,GO:0009536,GO:0009570,GO:0009579,GO:0009605,GO:0009607,GO:0009617,GO:0009620,GO:0009628,GO:0009814,GO:0009817,GO:0009941,GO:0009987,GO:0010033,GO:…	4.2.1.1	ko:K01673	ko00910,map00910	-	R00132,R10092	RC02807	ko00000,ko00001,ko01000	-	-	Pro_CA
Ssa01000460.t1	3885.XP_007151035.1	1.01e-163	466	COG0288@1|root,KOG1578@2759|Eukaryota,37QMN@33090|Viridiplantae,3GAY4@35493|Streptophyta,4JGSV@91835|fabids	35493|Streptophyta	P	Reversible hydration of carbon dioxide	-	GO:0002376,GO:0003674,GO:0003824,GO:0004089,GO:0005575,GO:0005576,GO:0005622,GO:0005623,GO:0005737,GO:0005829,GO:0005886,GO:0006950,GO:0006952,GO:0006955,GO:0008150,GO:0008152,GO:0009266,GO:0009409,GO:0009507,GO:0009526,GO:0009532,GO:0009534,GO:0009535,GO:0009536,GO:0009570,GO:0009579,GO:0009605,GO:0009607,GO:0009617,GO:0009620,GO:0009628,GO:0009814,GO:0009817,GO:0009941,GO:0009987,GO:0010033,GO:…	4.2.1.1	ko:K01673	ko00910,map00910	-	R00132,R10092	RC02807	ko00000,ko00001,ko01000	-	-	Pro_CA
Ssa01000460.t3	3847.GLYMA19G01050.1	1.21e-146	420	COG0288@1|root,KOG1578@2759|Eukaryota,37QMN@33090|Viridiplantae,3GAY4@35493|Streptophyta,4JGSV@91835|fabids	35493|Streptophyta	P	Reversible hydration of carbon dioxide	-	GO:0002376,GO:0003674,GO:0003824,GO:0004089,GO:0005575,GO:0005576,GO:0005622,GO:0005623,GO:0005737,GO:0005829,GO:0005886,GO:0006950,GO:0006952,GO:0006955,GO:0008150,GO:0008152,GO:0009266,GO:0009409,GO:0009507,GO:0009526,GO:0009532,GO:0009534,GO:0009535,GO:0009536,GO:0009570,GO:0009579,GO:0009605,GO:0009607,GO:0009617,GO:0009620,GO:0009628,GO:0009814,GO:0009817,GO:0009941,GO:0009987,GO:0010033,GO:…	4.2.1.1	ko:K01673	ko00910,map00910	-	R00132,R10092	RC02807	ko00000,ko00001,ko01000	-	-	Pro_CA
Ssa01000461.t1	4432.XP_010251254.1	1.39e-72	232	29TGJ@1|root,2RZTU@2759|Eukaryota,37UUG@33090|Viridiplantae,3GIKN@35493|Streptophyta	35493|Streptophyta	S	Protein of unknown function (DUF1645)	-	-	-	-	-	-	-	-	-	-	-	DUF1645
Ssa01000462.t1	3885.XP_007151025.1	0	1012	KOG0582@1|root,KOG0582@2759|Eukaryota,37K74@33090|Viridiplantae,3G9QR@35493|Streptophyta,4JJUU@91835|fabids	35493|Streptophyta	T	Serine threonine-protein kinase	-	GO:0001932,GO:0001934,GO:0003674,GO:0003824,GO:0004672,GO:0004674,GO:0005575,GO:0005622,GO:0005623,GO:0005737,GO:0006464,GO:0006468,GO:0006793,GO:0006796,GO:0006807,GO:0006950,GO:0007154,GO:0007165,GO:0007346,GO:0008150,GO:0008152,GO:0009893,GO:0009987,GO:0010562,GO:0010604,GO:0016301,GO:0016310,GO:0016740,GO:0016772,GO:0016773,GO:0019220,GO:0019222,GO:0019538,GO:0023014,GO:0023052,GO:0031098,GO:…	2.7.11.1	ko:K08835	-	-	-	-	ko00000,ko01000,ko01001	-	-	Pkinase
Ssa01000462.t2	3885.XP_007151025.1	0	1021	KOG0582@1|root,KOG0582@2759|Eukaryota,37K74@33090|Viridiplantae,3G9QR@35493|Streptophyta,4JJUU@91835|fabids	35493|Streptophyta	T	Serine threonine-protein kinase	-	GO:0001932,GO:0001934,GO:0003674,GO:0003824,GO:0004672,GO:0004674,GO:0005575,GO:0005622,GO:0005623,GO:0005737,GO:0006464,GO:0006468,GO:0006793,GO:0006796,GO:0006807,GO:0006950,GO:0007154,GO:0007165,GO:0007346,GO:0008150,GO:0008152,GO:0009893,GO:0009987,GO:0010562,GO:0010604,GO:0016301,GO:0016310,GO:0016740,GO:0016772,GO:0016773,GO:0019220,GO:0019222,GO:0019538,GO:0023014,GO:0023052,GO:0031098,GO:…	2.7.11.1	ko:K08835	-	-	-	-	ko00000,ko01000,ko01001	-	-	Pkinase
Ssa01000463.t1	3827.XP_004502501.1	6.3e-63	195	KOG4828@1|root,KOG4828@2759|Eukaryota,37VN3@33090|Viridiplantae,3GJEJ@35493|Streptophyta,4JU3S@91835|fabids	35493|Streptophyta	S	Proteasome assembly chaperone	-	-	-	ko:K11877	-	-	-	-	ko00000,ko03051	-	-	PAC3
Ssa01000464.t1	3847.GLYMA19G00980.1	1.68e-146	425	COG0451@1|root,KOG1502@2759|Eukaryota,37Q03@33090|Viridiplantae,3GF6N@35493|Streptophyta,4JMAR@91835|fabids	35493|Streptophyta	V	Belongs to the 3-beta-HSD family	-	GO:0003674,GO:0003824,GO:0006725,GO:0006950,GO:0006952,GO:0008150,GO:0008152,GO:0009058,GO:0009605,GO:0009607,GO:0009617,GO:0009698,GO:0009699,GO:0009808,GO:0009809,GO:0009889,GO:0009890,GO:0009892,GO:0009962,GO:0009964,GO:0009987,GO:0016491,GO:0016627,GO:0016628,GO:0019222,GO:0019438,GO:0019748,GO:0033729,GO:0042742,GO:0043207,GO:0044237,GO:0044249,GO:0044550,GO:0048519,GO:0050789,GO:0050896,GO:…	-	-	-	-	-	-	-	-	-	3Beta_HSD,Epimerase
Ssa01000465.t1	3880.AES74441	2.87e-48	160	2BM9X@1|root,2S1KE@2759|Eukaryota,37VKX@33090|Viridiplantae,3GJWR@35493|Streptophyta,4JQNV@91835|fabids	35493|Streptophyta	-	-	-	-	-	-	-	-	-	-	-	-	-	-
Ssa01000466.t1	3694.POPTR_0017s10800.1	2.48e-112	323	28MZD@1|root,2QUI8@2759|Eukaryota,37I66@33090|Viridiplantae,3GC8Q@35493|Streptophyta,4JFAF@91835|fabids	35493|Streptophyta	S	Universal stress protein A-like protein	-	GO:0000166,GO:0003674,GO:0005488,GO:0005575,GO:0005623,GO:0005886,GO:0008144,GO:0016020,GO:0016208,GO:0017076,GO:0030554,GO:0032553,GO:0032555,GO:0032559,GO:0036094,GO:0043167,GO:0043168,GO:0043169,GO:0044464,GO:0071944,GO:0097159,GO:0097367,GO:1901265,GO:1901363	-	-	-	-	-	-	-	-	-	Usp
Ssa01000466.t2	3694.POPTR_0017s10800.1	1.15e-107	312	28MZD@1|root,2QUI8@2759|Eukaryota,37I66@33090|Viridiplantae,3GC8Q@35493|Streptophyta,4JFAF@91835|fabids	35493|Streptophyta	S	Universal stress protein A-like protein	-	GO:0000166,GO:0003674,GO:0005488,GO:0005575,GO:0005623,GO:0005886,GO:0008144,GO:0016020,GO:0016208,GO:0017076,GO:0030554,GO:0032553,GO:0032555,GO:0032559,GO:0036094,GO:0043167,GO:0043168,GO:0043169,GO:0044464,GO:0071944,GO:0097159,GO:0097367,GO:1901265,GO:1901363	-	-	-	-	-	-	-	-	-	Usp
Ssa01000467.t1	3885.XP_007140959.1	5.97e-260	759	28IK4@1|root,2QU7H@2759|Eukaryota,37PYX@33090|Viridiplantae,3GXAK@35493|Streptophyta,4JRHQ@91835|fabids	35493|Streptophyta	S	PWWP domain	-	-	-	-	-	-	-	-	-	-	-	PWWP
Ssa01000468.t1	3750.XP_008357736.1	1.76e-81	247	COG0222@1|root,KOG1715@2759|Eukaryota,37U56@33090|Viridiplantae,3GI9Z@35493|Streptophyta,4JTU5@91835|fabids	35493|Streptophyta	J	50S ribosomal protein	RPL12-A	GO:0000311,GO:0000313,GO:0000315,GO:0005575,GO:0005622,GO:0005623,GO:0005737,GO:0005840,GO:0005911,GO:0006412,GO:0006518,GO:0006807,GO:0006950,GO:0006952,GO:0008150,GO:0008152,GO:0009058,GO:0009059,GO:0009295,GO:0009506,GO:0009507,GO:0009526,GO:0009532,GO:0009534,GO:0009535,GO:0009536,GO:0009547,GO:0009570,GO:0009579,GO:0009605,GO:0009607,GO:0009617,GO:0009719,GO:0009725,GO:0009735,GO:0009941,GO:…	-	ko:K02935	ko03010,map03010	M00178	-	-	br01610,ko00000,ko00001,ko00002,ko03011	-	-	Ribosomal_L12,Ribosomal_L12_N
Ssa01000468.t2	3750.XP_008357736.1	5.1e-83	250	COG0222@1|root,KOG1715@2759|Eukaryota,37U56@33090|Viridiplantae,3GI9Z@35493|Streptophyta,4JTU5@91835|fabids	35493|Streptophyta	J	50S ribosomal protein	RPL12-A	GO:0000311,GO:0000313,GO:0000315,GO:0005575,GO:0005622,GO:0005623,GO:0005737,GO:0005840,GO:0005911,GO:0006412,GO:0006518,GO:0006807,GO:0006950,GO:0006952,GO:0008150,GO:0008152,GO:0009058,GO:0009059,GO:0009295,GO:0009506,GO:0009507,GO:0009526,GO:0009532,GO:0009534,GO:0009535,GO:0009536,GO:0009547,GO:0009570,GO:0009579,GO:0009605,GO:0009607,GO:0009617,GO:0009719,GO:0009725,GO:0009735,GO:0009941,GO:…	-	ko:K02935	ko03010,map03010	M00178	-	-	br01610,ko00000,ko00001,ko00002,ko03011	-	-	Ribosomal_L12,Ribosomal_L12_N
Ssa01000469.t1	3847.GLYMA16G07970.1	2.23e-301	827	COG0446@1|root,KOG1336@2759|Eukaryota,37QMC@33090|Viridiplantae,3GEHP@35493|Streptophyta,4JEQ1@91835|fabids	35493|Streptophyta	S	monodehydroascorbate reductase, cytoplasmic isoform 2	-	GO:0003674,GO:0003824,GO:0005575,GO:0005622,GO:0005623,GO:0005737,GO:0005777,GO:0005778,GO:0005829,GO:0006950,GO:0006970,GO:0008150,GO:0008152,GO:0009056,GO:0009507,GO:0009526,GO:0009532,GO:0009536,GO:0009570,GO:0009628,GO:0009651,GO:0009941,GO:0009987,GO:0010035,GO:0010038,GO:0010043,GO:0016020,GO:0016491,GO:0016651,GO:0016655,GO:0016656,GO:0016999,GO:0017001,GO:0017144,GO:0031090,GO:0031903,GO:…	1.6.5.4	ko:K08232	ko00053,ko01100,map00053,map01100	-	R00095	-	ko00000,ko00001,ko01000	-	-	Pyr_redox_2
Ssa01000470.t1	3847.GLYMA05G08690.1	3.06e-98	291	COG5147@1|root,KOG0048@2759|Eukaryota,37SPI@33090|Viridiplantae,3GBY9@35493|Streptophyta,4JP3S@91835|fabids	35493|Streptophyta	K	Myb-related protein	MYB24	GO:0000003,GO:0000981,GO:0000988,GO:0000989,GO:0001067,GO:0001076,GO:0001101,GO:0001134,GO:0001135,GO:0003006,GO:0003674,GO:0003676,GO:0003677,GO:0003700,GO:0005488,GO:0005575,GO:0005622,GO:0005623,GO:0005634,GO:0006355,GO:0006357,GO:0007154,GO:0007165,GO:0007275,GO:0008150,GO:0009719,GO:0009725,GO:0009739,GO:0009740,GO:0009753,GO:0009755,GO:0009791,GO:0009867,GO:0009889,GO:0009908,GO:0009987,GO:…	-	ko:K09422	-	-	-	-	ko00000,ko03000	-	-	Myb_DNA-binding
Ssa01000471.t1	102107.XP_008221835.1	5.03e-128	363	COG1100@1|root,KOG0070@2759|Eukaryota,37PTM@33090|Viridiplantae	33090|Viridiplantae	U	Belongs to the small GTPase superfamily. Arf family	-	GO:0005575,GO:0005622,GO:0005623,GO:0005737,GO:0005794,GO:0012505,GO:0043226,GO:0043227,GO:0043229,GO:0043231,GO:0044424,GO:0044444,GO:0044464	-	ko:K07937	ko04072,ko04144,ko05110,ko05134,map04072,map04144,map05110,map05134	-	-	-	ko00000,ko00001,ko04031,ko04131,ko04147	-	-	Arf
Ssa01000472.t1	3885.XP_007140965.1	6.49e-287	784	COG0515@1|root,KOG0658@2759|Eukaryota,37IWS@33090|Viridiplantae,3G7U0@35493|Streptophyta,4JSUR@91835|fabids	35493|Streptophyta	T	Shaggy-related protein kinase epsilon	-	GO:0003674,GO:0003824,GO:0004672,GO:0004674,GO:0005575,GO:0005622,GO:0005623,GO:0005737,GO:0005829,GO:0006464,GO:0006468,GO:0006793,GO:0006796,GO:0006807,GO:0006950,GO:0006970,GO:0006972,GO:0008150,GO:0008152,GO:0009628,GO:0009651,GO:0009987,GO:0016301,GO:0016310,GO:0016740,GO:0016772,GO:0016773,GO:0019538,GO:0036211,GO:0043170,GO:0043412,GO:0044237,GO:0044238,GO:0044260,GO:0044267,GO:0044424,GO:…	2.7.11.26	ko:K03083	ko01521,ko04012,ko04062,ko04110,ko04150,ko04151,ko04310,ko04340,ko04341,ko04360,ko04390,ko04510,ko04550,ko04657,ko04660,ko04662,ko04711,ko04722,ko04728,ko04910,ko04916,ko04917,ko04919,ko04931,ko04932,ko04934,ko05010,ko05160,ko05162,ko05164,ko05165,ko05166,ko05167,ko05169,ko05200,ko05210,ko05213,ko05215,ko05217,ko05224,ko05225,ko05226,map01521,map04012,map04062,map04110,map04150,map04151,map04310,…	M00677	-	-	ko00000,ko00001,ko00002,ko01000,ko01001,ko03036	-	-	Pkinase
Ssa01000473.t1	3847.GLYMA05G08740.4	1.06e-290	808	2CNFU@1|root,2QVZV@2759|Eukaryota,37QKF@33090|Viridiplantae,3G815@35493|Streptophyta,4JD9U@91835|fabids	35493|Streptophyta	S	DNA (cytosine-5)-methyltransferase	DRM2	GO:0003674,GO:0003824,GO:0003886,GO:0005575,GO:0005622,GO:0005623,GO:0005634,GO:0005654,GO:0006139,GO:0006259,GO:0006304,GO:0006305,GO:0006306,GO:0006325,GO:0006342,GO:0006346,GO:0006355,GO:0006464,GO:0006479,GO:0006725,GO:0006807,GO:0006950,GO:0006952,GO:0006996,GO:0008150,GO:0008152,GO:0008168,GO:0008213,GO:0008757,GO:0009008,GO:0009605,GO:0009607,GO:0009620,GO:0009743,GO:0009744,GO:0009746,GO:…	-	-	-	-	-	-	-	-	-	DNA_methylase
Ssa01000473.t2	3847.GLYMA05G08740.4	7.05e-317	875	2CNFU@1|root,2QVZV@2759|Eukaryota,37QKF@33090|Viridiplantae,3G815@35493|Streptophyta,4JD9U@91835|fabids	35493|Streptophyta	S	DNA (cytosine-5)-methyltransferase	DRM2	GO:0003674,GO:0003824,GO:0003886,GO:0005575,GO:0005622,GO:0005623,GO:0005634,GO:0005654,GO:0006139,GO:0006259,GO:0006304,GO:0006305,GO:0006306,GO:0006325,GO:0006342,GO:0006346,GO:0006355,GO:0006464,GO:0006479,GO:0006725,GO:0006807,GO:0006950,GO:0006952,GO:0006996,GO:0008150,GO:0008152,GO:0008168,GO:0008213,GO:0008757,GO:0009008,GO:0009605,GO:0009607,GO:0009620,GO:0009743,GO:0009744,GO:0009746,GO:…	-	-	-	-	-	-	-	-	-	DNA_methylase
Ssa01000474.t1	3847.GLYMA05G08750.1	0	981	COG0513@1|root,KOG0331@2759|Eukaryota,37JKF@33090|Viridiplantae,3G7NV@35493|Streptophyta,4JKZ6@91835|fabids	35493|Streptophyta	A	Belongs to the DEAD box helicase family	-	GO:0003674,GO:0003724,GO:0003824,GO:0004004,GO:0004386,GO:0004672,GO:0004674,GO:0005575,GO:0005622,GO:0005623,GO:0005634,GO:0005730,GO:0005737,GO:0005829,GO:0006139,GO:0006464,GO:0006468,GO:0006725,GO:0006793,GO:0006796,GO:0006807,GO:0006950,GO:0006970,GO:0006972,GO:0008026,GO:0008150,GO:0008152,GO:0008186,GO:0009628,GO:0009651,GO:0009987,GO:0010501,GO:0016070,GO:0016301,GO:0016310,GO:0016462,GO:…	3.6.4.13	ko:K12823	ko03040,ko05202,ko05205,map03040,map05202,map05205	-	-	-	ko00000,ko00001,ko01000,ko03009,ko03041	-	-	DEAD,Helicase_C,WW
Ssa01000474.t2	3847.GLYMA05G08750.1	0	970	COG0513@1|root,KOG0331@2759|Eukaryota,37JKF@33090|Viridiplantae,3G7NV@35493|Streptophyta,4JKZ6@91835|fabids	35493|Streptophyta	A	Belongs to the DEAD box helicase family	-	GO:0003674,GO:0003724,GO:0003824,GO:0004004,GO:0004386,GO:0004672,GO:0004674,GO:0005575,GO:0005622,GO:0005623,GO:0005634,GO:0005730,GO:0005737,GO:0005829,GO:0006139,GO:0006464,GO:0006468,GO:0006725,GO:0006793,GO:0006796,GO:0006807,GO:0006950,GO:0006970,GO:0006972,GO:0008026,GO:0008150,GO:0008152,GO:0008186,GO:0009628,GO:0009651,GO:0009987,GO:0010501,GO:0016070,GO:0016301,GO:0016310,GO:0016462,GO:…	3.6.4.13	ko:K12823	ko03040,ko05202,ko05205,map03040,map05202,map05205	-	-	-	ko00000,ko00001,ko01000,ko03009,ko03041	-	-	DEAD,Helicase_C,WW
Ssa01000475.t1	3847.GLYMA16G07927.1	3.28e-62	214	COG5147@1|root,KOG0048@2759|Eukaryota,37J6R@33090|Viridiplantae,3GJA3@35493|Streptophyta,4JPT0@91835|fabids	35493|Streptophyta	K	Transcription factor MYB98-like	-	GO:0000003,GO:0000981,GO:0000988,GO:0000989,GO:0001067,GO:0001076,GO:0001134,GO:0001135,GO:0003006,GO:0003674,GO:0003676,GO:0003677,GO:0003700,GO:0005488,GO:0005575,GO:0005622,GO:0005623,GO:0005634,GO:0006109,GO:0006355,GO:0006357,GO:0007275,GO:0008150,GO:0009790,GO:0009791,GO:0009793,GO:0009888,GO:0009889,GO:0009891,GO:0009893,GO:0009960,GO:0009987,GO:0010154,GO:0010228,GO:0010262,GO:0010439,GO:…	-	ko:K09422	-	-	-	-	ko00000,ko03000	-	-	Myb_DNA-binding
Ssa01000476.t1	3847.GLYMA19G00270.1	4.83e-178	509	KOG1441@1|root,KOG1441@2759|Eukaryota,37RXZ@33090|Viridiplantae,3GFJR@35493|Streptophyta,4JEMW@91835|fabids	35493|Streptophyta	EG	Phosphoenolpyruvate phosphate translocator 2	-	GO:0003674,GO:0005215,GO:0005342,GO:0006810,GO:0006811,GO:0006820,GO:0008028,GO:0008150,GO:0008509,GO:0008514,GO:0009670,GO:0015075,GO:0015121,GO:0015291,GO:0015297,GO:0015301,GO:0015318,GO:0015355,GO:0015605,GO:0015711,GO:0015714,GO:0015717,GO:0015718,GO:0015748,GO:0015849,GO:0022804,GO:0022857,GO:0034220,GO:0035436,GO:0046942,GO:0046943,GO:0051179,GO:0051234,GO:0055085,GO:0071702,GO:0071917,GO:…	-	ko:K15283	-	-	-	-	ko00000,ko02000	2.A.7.9	-	TPT
Ssa01000477.t1	3827.XP_004491731.1	2.46e-142	412	28MG6@1|root,2QUB3@2759|Eukaryota,37MZP@33090|Viridiplantae,3G8JP@35493|Streptophyta,4JHST@91835|fabids	35493|Streptophyta	-	-	-	-	-	-	-	-	-	-	-	-	-	-
Ssa01000478.t1	71139.XP_010029146.1	1.25e-54	172	COG0695@1|root,KOG1752@2759|Eukaryota,37V77@33090|Viridiplantae,3GJCN@35493|Streptophyta	35493|Streptophyta	O	Glutaredoxin	-	-	-	ko:K03676	-	-	-	-	ko00000,ko03110	-	-	Glutaredoxin
Ssa01000479.t1	3760.EMJ18896	0	1429	COG1185@1|root,KOG1067@2759|Eukaryota,37IDV@33090|Viridiplantae,3GEEI@35493|Streptophyta,4JIAD@91835|fabids	35493|Streptophyta	J	Polyribonucleotide nucleotidyltransferase	-	GO:0000175,GO:0000957,GO:0000959,GO:0000963,GO:0003674,GO:0003824,GO:0004518,GO:0004527,GO:0004532,GO:0004540,GO:0004654,GO:0006139,GO:0006396,GO:0006401,GO:0006725,GO:0006807,GO:0008150,GO:0008152,GO:0008408,GO:0009056,GO:0009057,GO:0009987,GO:0010467,GO:0016070,GO:0016740,GO:0016772,GO:0016779,GO:0016787,GO:0016788,GO:0016796,GO:0016896,GO:0019439,GO:0034641,GO:0034655,GO:0043170,GO:0044237,GO:…	2.7.7.8	ko:K00962	ko00230,ko00240,ko03018,map00230,map00240,map03018	M00394	R00437,R00438,R00439,R00440	RC02795	ko00000,ko00001,ko00002,ko01000,ko03016,ko03019	-	-	KH_1,PNPase,RNase_PH,RNase_PH_C,S1
Ssa01000480.t1	3847.GLYMA19G13770.1	0	936	COG0515@1|root,2QRU4@2759|Eukaryota,37I55@33090|Viridiplantae,3GF6Y@35493|Streptophyta,4JJDE@91835|fabids	35493|Streptophyta	T	Cysteine-rich receptor-like protein kinase	-	GO:0003674,GO:0003824,GO:0004672,GO:0004674,GO:0005575,GO:0005623,GO:0005886,GO:0006464,GO:0006468,GO:0006793,GO:0006796,GO:0006807,GO:0008150,GO:0008152,GO:0009987,GO:0016020,GO:0016301,GO:0016310,GO:0016740,GO:0016772,GO:0016773,GO:0019538,GO:0036211,GO:0043170,GO:0043412,GO:0044237,GO:0044238,GO:0044260,GO:0044267,GO:0044464,GO:0071704,GO:0071944,GO:0140096,GO:1901564	-	-	-	-	-	-	-	-	-	Pkinase,Pkinase_Tyr,Stress-antifung
Ssa01000481.t1	3847.GLYMA16G07850.2	0	1722	COG1204@1|root,KOG0952@2759|Eukaryota,37NIP@33090|Viridiplantae,3GH4R@35493|Streptophyta,4JNPK@91835|fabids	35493|Streptophyta	A	ATP-dependent DNA helicase	RCK	GO:0000003,GO:0000280,GO:0003674,GO:0003678,GO:0003724,GO:0003824,GO:0004004,GO:0004386,GO:0005575,GO:0005622,GO:0005623,GO:0005634,GO:0005694,GO:0005730,GO:0005737,GO:0006139,GO:0006259,GO:0006310,GO:0006725,GO:0006807,GO:0006996,GO:0007049,GO:0007059,GO:0007127,GO:0007129,GO:0007131,GO:0008026,GO:0008150,GO:0008152,GO:0008186,GO:0009987,GO:0010501,GO:0016043,GO:0016070,GO:0016462,GO:0016787,GO:…	3.6.4.12	ko:K15271	-	-	-	-	ko00000,ko01000,ko03400	-	-	DEAD,HHH_5,Helicase_C,Sec63
Ssa01000481.t2	3847.GLYMA16G07850.2	0	1774	COG1204@1|root,KOG0952@2759|Eukaryota,37NIP@33090|Viridiplantae,3GH4R@35493|Streptophyta,4JNPK@91835|fabids	35493|Streptophyta	A	ATP-dependent DNA helicase	RCK	GO:0000003,GO:0000280,GO:0003674,GO:0003678,GO:0003724,GO:0003824,GO:0004004,GO:0004386,GO:0005575,GO:0005622,GO:0005623,GO:0005634,GO:0005694,GO:0005730,GO:0005737,GO:0006139,GO:0006259,GO:0006310,GO:0006725,GO:0006807,GO:0006996,GO:0007049,GO:0007059,GO:0007127,GO:0007129,GO:0007131,GO:0008026,GO:0008150,GO:0008152,GO:0008186,GO:0009987,GO:0010501,GO:0016043,GO:0016070,GO:0016462,GO:0016787,GO:…	3.6.4.12	ko:K15271	-	-	-	-	ko00000,ko01000,ko03400	-	-	DEAD,HHH_5,Helicase_C,Sec63
Ssa01000483.t1	4432.XP_010278255.1	1.23e-212	596	COG0639@1|root,KOG0374@2759|Eukaryota,37J5F@33090|Viridiplantae,3GH6G@35493|Streptophyta	35493|Streptophyta	T	superfamily. Protein	-	GO:0003674,GO:0003824,GO:0005488,GO:0005575,GO:0005622,GO:0005623,GO:0005737,GO:0005829,GO:0006793,GO:0006796,GO:0008150,GO:0008152,GO:0009987,GO:0016311,GO:0016787,GO:0016788,GO:0016791,GO:0030145,GO:0042578,GO:0043167,GO:0043169,GO:0044237,GO:0044424,GO:0044444,GO:0044464,GO:0046872,GO:0046914	-	-	-	-	-	-	-	-	-	Metallophos
Ssa01000484.t1	85681.XP_006446558.1	1.42e-232	651	COG2223@1|root,2R19F@2759|Eukaryota,37NCY@33090|Viridiplantae,3GCAM@35493|Streptophyta	35493|Streptophyta	P	High affinity nitrate transporter	-	GO:0000325,GO:0001101,GO:0003674,GO:0005215,GO:0005575,GO:0005622,GO:0005623,GO:0005737,GO:0005773,GO:0005774,GO:0005886,GO:0006810,GO:0006811,GO:0006820,GO:0008150,GO:0008509,GO:0009705,GO:0009987,GO:0010035,GO:0010167,GO:0015075,GO:0015103,GO:0015112,GO:0015318,GO:0015698,GO:0015706,GO:0016020,GO:0022857,GO:0031090,GO:0034220,GO:0042221,GO:0043226,GO:0043227,GO:0043229,GO:0043231,GO:0044422,GO:…	-	ko:K02575	ko00910,map00910	M00615	-	-	ko00000,ko00001,ko00002,ko02000	2.A.1.8	-	MFS_1
Ssa01000485.t2	3847.GLYMA05G08800.4	1.62e-70	224	2AXTP@1|root,2S01N@2759|Eukaryota,37UZE@33090|Viridiplantae,3GJVC@35493|Streptophyta,4JQAH@91835|fabids	35493|Streptophyta	-	-	-	-	-	-	-	-	-	-	-	-	-	-
Ssa01000485.t1	3847.GLYMA05G08800.4	6.33e-70	223	2AXTP@1|root,2S01N@2759|Eukaryota,37UZE@33090|Viridiplantae,3GJVC@35493|Streptophyta,4JQAH@91835|fabids	35493|Streptophyta	-	-	-	-	-	-	-	-	-	-	-	-	-	-
Ssa01000486.t1	3847.GLYMA19G13280.1	4.49e-151	432	COG0484@1|root,KOG0716@2759|Eukaryota,37SJK@33090|Viridiplantae,3G86X@35493|Streptophyta,4JFJY@91835|fabids	35493|Streptophyta	O	4Fe-4S single cluster domain of Ferredoxin I	-	-	-	-	-	-	-	-	-	-	-	DnaJ,Fer4_13,Fer4_15
Ssa01000487.t1	3847.GLYMA05G08810.1	1.01e-107	315	COG2138@1|root,2RXIW@2759|Eukaryota,37TYY@33090|Viridiplantae,3GHWI@35493|Streptophyta,4JNWD@91835|fabids	35493|Streptophyta	S	Sirohydrochlorin	-	GO:0003674,GO:0003824,GO:0004325,GO:0005488,GO:0005515,GO:0005575,GO:0005622,GO:0005623,GO:0005737,GO:0006725,GO:0006778,GO:0006779,GO:0006783,GO:0006807,GO:0006950,GO:0006979,GO:0008150,GO:0008152,GO:0009058,GO:0009507,GO:0009536,GO:0009987,GO:0016829,GO:0018130,GO:0019354,GO:0019438,GO:0033013,GO:0033014,GO:0034641,GO:0042168,GO:0042440,GO:0042802,GO:0043226,GO:0043227,GO:0043229,GO:0043231,GO:…	4.99.1.4	ko:K03794	ko00860,ko01100,ko01110,map00860,map01100,map01110	M00121	R02864	RC01012	ko00000,ko00001,ko00002,ko01000	-	-	CbiX
Ssa01000488.t1	3885.XP_007143990.1	8.57e-113	328	2BYKQ@1|root,2QQ4A@2759|Eukaryota,37KIT@33090|Viridiplantae,3G7XG@35493|Streptophyta,4JH18@91835|fabids	35493|Streptophyta	S	Germin-like protein subfamily 1 member	-	-	-	-	-	-	-	-	-	-	-	Cupin_1
Ssa01000489.t1	3885.XP_007143990.1	6.33e-115	334	2BYKQ@1|root,2QQ4A@2759|Eukaryota,37KIT@33090|Viridiplantae,3G7XG@35493|Streptophyta,4JH18@91835|fabids	35493|Streptophyta	S	Germin-like protein subfamily 1 member	-	-	-	-	-	-	-	-	-	-	-	Cupin_1
Ssa01000490.t1	3885.XP_007143990.1	4.46e-115	334	2BYKQ@1|root,2QQ4A@2759|Eukaryota,37KIT@33090|Viridiplantae,3G7XG@35493|Streptophyta,4JH18@91835|fabids	35493|Streptophyta	S	Germin-like protein subfamily 1 member	-	-	-	-	-	-	-	-	-	-	-	Cupin_1
Ssa01000491.t1	3827.XP_004489240.1	3.74e-112	327	2BYKQ@1|root,2QQ4A@2759|Eukaryota,37KIT@33090|Viridiplantae,3G7XG@35493|Streptophyta,4JH18@91835|fabids	35493|Streptophyta	S	Germin-like protein subfamily 1 member	-	-	-	-	-	-	-	-	-	-	-	Cupin_1
Ssa01000492.t1	3827.XP_004489240.1	1.12e-113	330	2BYKQ@1|root,2QQ4A@2759|Eukaryota,37KIT@33090|Viridiplantae,3G7XG@35493|Streptophyta,4JH18@91835|fabids	35493|Streptophyta	S	Germin-like protein subfamily 1 member	-	-	-	-	-	-	-	-	-	-	-	Cupin_1
Ssa01000493.t1	3885.XP_007143990.1	6.33e-115	334	2BYKQ@1|root,2QQ4A@2759|Eukaryota,37KIT@33090|Viridiplantae,3G7XG@35493|Streptophyta,4JH18@91835|fabids	35493|Streptophyta	S	Germin-like protein subfamily 1 member	-	-	-	-	-	-	-	-	-	-	-	Cupin_1
Ssa01000494.t1	3827.XP_004489240.1	3.74e-112	327	2BYKQ@1|root,2QQ4A@2759|Eukaryota,37KIT@33090|Viridiplantae,3G7XG@35493|Streptophyta,4JH18@91835|fabids	35493|Streptophyta	S	Germin-like protein subfamily 1 member	-	-	-	-	-	-	-	-	-	-	-	Cupin_1
Ssa01000495.t1	3827.XP_004489240.1	3.22e-113	329	2BYKQ@1|root,2QQ4A@2759|Eukaryota,37KIT@33090|Viridiplantae,3G7XG@35493|Streptophyta,4JH18@91835|fabids	35493|Streptophyta	S	Germin-like protein subfamily 1 member	-	-	-	-	-	-	-	-	-	-	-	Cupin_1
Ssa01000496.t1	3885.XP_007143990.1	5.44e-116	337	2BYKQ@1|root,2QQ4A@2759|Eukaryota,37KIT@33090|Viridiplantae,3G7XG@35493|Streptophyta,4JH18@91835|fabids	35493|Streptophyta	S	Germin-like protein subfamily 1 member	-	-	-	-	-	-	-	-	-	-	-	Cupin_1
Ssa01000497.t1	3827.XP_004489240.1	3.74e-112	327	2BYKQ@1|root,2QQ4A@2759|Eukaryota,37KIT@33090|Viridiplantae,3G7XG@35493|Streptophyta,4JH18@91835|fabids	35493|Streptophyta	S	Germin-like protein subfamily 1 member	-	-	-	-	-	-	-	-	-	-	-	Cupin_1
Ssa01000498.t1	3827.XP_004489240.1	1.12e-113	330	2BYKQ@1|root,2QQ4A@2759|Eukaryota,37KIT@33090|Viridiplantae,3G7XG@35493|Streptophyta,4JH18@91835|fabids	35493|Streptophyta	S	Germin-like protein subfamily 1 member	-	-	-	-	-	-	-	-	-	-	-	Cupin_1
Ssa01000499.t1	102107.XP_008230557.1	8.77e-182	531	2CMAX@1|root,2QPU7@2759|Eukaryota,37KPF@33090|Viridiplantae,3GDUU@35493|Streptophyta,4JMVG@91835|fabids	35493|Streptophyta	S	UBA-like domain (DUF1421)	-	-	2.6.1.99	ko:K16903	ko00380,ko01100,map00380,map01100	-	R10180	RC00006,RC00008	ko00000,ko00001,ko01000	-	-	DUF1421
Ssa01000500.t1	3641.EOY02480	0	1270	2CC3R@1|root,2QTKB@2759|Eukaryota,37K5N@33090|Viridiplantae,3G7A8@35493|Streptophyta	35493|Streptophyta	S	galactinol--sucrose	-	GO:0001101,GO:0003674,GO:0003824,GO:0005575,GO:0005622,GO:0005623,GO:0005737,GO:0006950,GO:0006979,GO:0008150,GO:0008378,GO:0009414,GO:0009415,GO:0009507,GO:0009536,GO:0009628,GO:0009719,GO:0009725,GO:0009737,GO:0010033,GO:0010035,GO:0016740,GO:0016757,GO:0016758,GO:0033993,GO:0042221,GO:0043226,GO:0043227,GO:0043229,GO:0043231,GO:0044424,GO:0044444,GO:0044464,GO:0047274,GO:0050896,GO:0097305,GO:…	2.4.1.82	ko:K06617	ko00052,map00052	-	R02411	RC00049,RC00059	ko00000,ko00001,ko01000	-	GH36	Raffinose_syn
Ssa01000501.t1	3847.GLYMA05G08970.1	4.64e-224	622	28JTK@1|root,2QS7F@2759|Eukaryota,37MMQ@33090|Viridiplantae,3GEKT@35493|Streptophyta,4JFY5@91835|fabids	35493|Streptophyta	S	Core-2/I-Branching enzyme	-	-	-	-	-	-	-	-	-	-	-	Branch
Ssa01000502.t1	3847.GLYMA19G00510.2	0	1066	KOG2135@1|root,KOG2135@2759|Eukaryota,37KMJ@33090|Viridiplantae,3GFX7@35493|Streptophyta,4JMT7@91835|fabids	35493|Streptophyta	A	zinc finger CCCH domain-containing protein	-	GO:0003674,GO:0003676,GO:0003723,GO:0003729,GO:0005488,GO:0097159,GO:1901363	-	ko:K13192	-	-	-	-	ko00000,ko01009,ko03019,ko03041	-	-	RRM_1
Ssa01000503.t1	3847.GLYMA05G08890.1	8.27e-114	362	KOG4197@1|root,KOG4197@2759|Eukaryota,37M7E@33090|Viridiplantae,3GCEW@35493|Streptophyta,4JMNF@91835|fabids	35493|Streptophyta	S	Pentatricopeptide repeat-containing protein	-	GO:0003674,GO:0003676,GO:0003723,GO:0003824,GO:0004518,GO:0004519,GO:0005488,GO:0005575,GO:0005622,GO:0005623,GO:0006139,GO:0006725,GO:0006807,GO:0008150,GO:0008152,GO:0009451,GO:0009987,GO:0016070,GO:0016787,GO:0016788,GO:0034641,GO:0043170,GO:0043226,GO:0043227,GO:0043229,GO:0043231,GO:0043412,GO:0044237,GO:0044238,GO:0044424,GO:0044464,GO:0046483,GO:0071704,GO:0090304,GO:0090305,GO:0097159,GO:…	-	-	-	-	-	-	-	-	-	PPR,PPR_1,PPR_2,PPR_3
Ssa01000504.t2	3847.GLYMA19G00410.2	0	1959	2C769@1|root,2QQKG@2759|Eukaryota,37K0F@33090|Viridiplantae,3G8P8@35493|Streptophyta,4JD0Y@91835|fabids	35493|Streptophyta	S	Encoded by	-	-	-	-	-	-	-	-	-	-	-	DUF3730
Ssa01000504.t1	3827.XP_004489220.1	0	2362	2C769@1|root,2QQKG@2759|Eukaryota,37K0F@33090|Viridiplantae,3G8P8@35493|Streptophyta,4JD0Y@91835|fabids	35493|Streptophyta	S	Encoded by	-	-	-	-	-	-	-	-	-	-	-	DUF3730
Ssa01000505.t1	3847.GLYMA19G13070.1	2.44e-219	607	KOG1446@1|root,KOG1446@2759|Eukaryota,37RE5@33090|Viridiplantae,3GBJ5@35493|Streptophyta,4JKR1@91835|fabids	35493|Streptophyta	ABO	WD repeat-containing protein	-	GO:0000151,GO:0003674,GO:0003682,GO:0005488,GO:0005575,GO:0005622,GO:0005623,GO:0005634,GO:0005654,GO:0006325,GO:0006464,GO:0006479,GO:0006807,GO:0006996,GO:0008150,GO:0008152,GO:0008213,GO:0009987,GO:0016043,GO:0016569,GO:0016570,GO:0016571,GO:0018022,GO:0018023,GO:0018193,GO:0018205,GO:0019538,GO:0031461,GO:0031974,GO:0031981,GO:0032259,GO:0032991,GO:0034708,GO:0034968,GO:0035097,GO:0036211,GO:…	-	ko:K14962	ko03015,map03015	-	-	-	ko00000,ko00001,ko03019,ko03036	-	-	ANAPC4_WD40,WD40
Ssa01000506.t1	3827.XP_004493360.1	8.86e-56	181	2BP40@1|root,2S1R0@2759|Eukaryota,37VMT@33090|Viridiplantae,3GJM0@35493|Streptophyta,4JQAK@91835|fabids	35493|Streptophyta	S	Oleosin 18.2	-	GO:0000003,GO:0003006,GO:0003674,GO:0003676,GO:0003723,GO:0003729,GO:0005488,GO:0005575,GO:0005622,GO:0005623,GO:0005811,GO:0006950,GO:0007275,GO:0008150,GO:0009266,GO:0009409,GO:0009628,GO:0009791,GO:0009845,GO:0010154,GO:0010344,GO:0010876,GO:0012511,GO:0016020,GO:0019915,GO:0022414,GO:0032501,GO:0032502,GO:0033036,GO:0043226,GO:0043228,GO:0043229,GO:0043232,GO:0044085,GO:0044424,GO:0044464,GO:…	-	-	-	-	-	-	-	-	-	Oleosin
Ssa01000507.t1	3885.XP_007140818.1	1.77e-81	245	28KBI@1|root,2RY39@2759|Eukaryota,37UDE@33090|Viridiplantae,3GHYN@35493|Streptophyta,4JNZJ@91835|fabids	35493|Streptophyta	S	LOB domain-containing protein	-	-	-	-	-	-	-	-	-	-	-	LOB
Ssa01000508.t1	981085.XP_010108821.1	6.76e-244	684	KOG0321@1|root,KOG0321@2759|Eukaryota,37NKS@33090|Viridiplantae,3GGQY@35493|Streptophyta,4JF6X@91835|fabids	35493|Streptophyta	S	Denticleless protein homolog	-	GO:0000075,GO:0000077,GO:0000151,GO:0000209,GO:0000731,GO:0005575,GO:0005622,GO:0005623,GO:0005634,GO:0005813,GO:0005815,GO:0005856,GO:0006139,GO:0006259,GO:0006281,GO:0006301,GO:0006464,GO:0006508,GO:0006511,GO:0006513,GO:0006725,GO:0006807,GO:0006950,GO:0006974,GO:0007154,GO:0007165,GO:0008150,GO:0008152,GO:0009056,GO:0009057,GO:0009058,GO:0009059,GO:0009314,GO:0009411,GO:0009416,GO:0009628,GO:…	-	ko:K11790	-	-	-	-	ko00000,ko04121	-	-	WD40
Ssa01000509.t1	3827.XP_004499604.1	2.01e-142	408	COG5636@1|root,KOG4020@2759|Eukaryota,37J5T@33090|Viridiplantae,3GB38@35493|Streptophyta,4JREK@91835|fabids	35493|Streptophyta	S	Component of the cytosolic iron-sulfur (Fe-S) protein assembly (CIA) machinery. Required for the maturation of extramitochondrial Fe-S proteins. Part of an electron transfer chain functioning in an early step of cytosolic Fe-S biogenesis. Electrons are transferred to the Fe-S cluster from NADPH via a FAD- and FMN-containing diflavin oxidoreductase. Has anti- apoptotic effects in the cell	-	GO:0005575,GO:0005622,GO:0005623,GO:0005737,GO:0006790,GO:0008150,GO:0008152,GO:0009987,GO:0016043,GO:0016226,GO:0022607,GO:0031163,GO:0044085,GO:0044237,GO:0044424,GO:0044464,GO:0051186,GO:0071840	-	-	-	-	-	-	-	-	-	CIAPIN1,Methyltransf_11
Ssa01000510.t1	3885.XP_007143421.1	0	928	COG5163@1|root,KOG2481@2759|Eukaryota,37RNT@33090|Viridiplantae,3G9IT@35493|Streptophyta,4JM6C@91835|fabids	35493|Streptophyta	A	Required for maturation of ribosomal RNAs and formation of the large ribosomal subunit	-	GO:0000463,GO:0000470,GO:0003674,GO:0003676,GO:0003723,GO:0005488,GO:0005575,GO:0005622,GO:0005623,GO:0005634,GO:0005730,GO:0006139,GO:0006364,GO:0006396,GO:0006725,GO:0006807,GO:0008150,GO:0008152,GO:0009987,GO:0010467,GO:0010468,GO:0016070,GO:0016072,GO:0019219,GO:0019222,GO:0022613,GO:0030684,GO:0030686,GO:0031323,GO:0031974,GO:0031981,GO:0032991,GO:0034470,GO:0034641,GO:0034660,GO:0042254,GO:…	-	ko:K14843	-	-	-	-	ko00000,ko03009	-	-	BRCT_2,Pescadillo_N
Ssa01000514.t1	102107.XP_008230540.1	6.79e-180	519	KOG1947@1|root,KOG1947@2759|Eukaryota,37KNZ@33090|Viridiplantae,3GCGA@35493|Streptophyta,4JFR0@91835|fabids	35493|Streptophyta	S	F-box LRR-repeat protein	-	-	-	ko:K10268	-	-	-	-	ko00000,ko04121	-	-	F-box,F-box-like,LRR_6
Ssa01000515.t1	3827.XP_004489229.1	0	962	KOG3566@1|root,KOG3566@2759|Eukaryota,37QJC@33090|Viridiplantae,3GCWY@35493|Streptophyta,4JEJE@91835|fabids	35493|Streptophyta	O	Glycosylphosphatidylinositol anchor attachment 1	-	GO:0003674,GO:0003824,GO:0003923,GO:0005575,GO:0005622,GO:0005623,GO:0005737,GO:0005783,GO:0005789,GO:0005886,GO:0005887,GO:0006464,GO:0006497,GO:0006505,GO:0006506,GO:0006629,GO:0006643,GO:0006644,GO:0006650,GO:0006661,GO:0006664,GO:0006793,GO:0006796,GO:0006807,GO:0008150,GO:0008152,GO:0008610,GO:0008654,GO:0009058,GO:0009059,GO:0009247,GO:0009987,GO:0012505,GO:0016020,GO:0016021,GO:0016255,GO:…	-	ko:K05289	ko00563,ko01100,map00563,map01100	-	-	-	ko00000,ko00001	-	-	Gaa1
Ssa01000515.t2	3827.XP_004489229.1	0	1011	KOG3566@1|root,KOG3566@2759|Eukaryota,37QJC@33090|Viridiplantae,3GCWY@35493|Streptophyta,4JEJE@91835|fabids	35493|Streptophyta	O	Glycosylphosphatidylinositol anchor attachment 1	-	GO:0003674,GO:0003824,GO:0003923,GO:0005575,GO:0005622,GO:0005623,GO:0005737,GO:0005783,GO:0005789,GO:0005886,GO:0005887,GO:0006464,GO:0006497,GO:0006505,GO:0006506,GO:0006629,GO:0006643,GO:0006644,GO:0006650,GO:0006661,GO:0006664,GO:0006793,GO:0006796,GO:0006807,GO:0008150,GO:0008152,GO:0008610,GO:0008654,GO:0009058,GO:0009059,GO:0009247,GO:0009987,GO:0012505,GO:0016020,GO:0016021,GO:0016255,GO:…	-	ko:K05289	ko00563,ko01100,map00563,map01100	-	-	-	ko00000,ko00001	-	-	Gaa1
Ssa01000516.t1	3827.XP_004514017.1	3.42e-291	816	COG1132@1|root,KOG0058@2759|Eukaryota,37S83@33090|Viridiplantae,3GE5R@35493|Streptophyta,4JMT1@91835|fabids	35493|Streptophyta	Q	ABC transporter B family member 26, chloroplastic-like	-	-	-	ko:K05656,ko:K05657	ko02010,ko04142,map02010,map04142	-	-	-	ko00000,ko00001,ko02000	3.A.1.201,3.A.1.209	-	ABC_membrane,ABC_tran
Ssa01000516.t2	3827.XP_004514017.1	0	915	COG1132@1|root,KOG0058@2759|Eukaryota,37S83@33090|Viridiplantae,3GE5R@35493|Streptophyta,4JMT1@91835|fabids	35493|Streptophyta	Q	ABC transporter B family member 26, chloroplastic-like	-	-	-	ko:K05656,ko:K05657	ko02010,ko04142,map02010,map04142	-	-	-	ko00000,ko00001,ko02000	3.A.1.201,3.A.1.209	-	ABC_membrane,ABC_tran
Ssa01000516.t3	3847.GLYMA16G07691.1	7.49e-268	751	COG1132@1|root,KOG0058@2759|Eukaryota,37S83@33090|Viridiplantae,3GE5R@35493|Streptophyta,4JMT1@91835|fabids	35493|Streptophyta	Q	ABC transporter B family member 26, chloroplastic-like	-	-	-	ko:K05656,ko:K05657	ko02010,ko04142,map02010,map04142	-	-	-	ko00000,ko00001,ko02000	3.A.1.201,3.A.1.209	-	ABC_membrane,ABC_tran
Ssa01000516.t4	3847.GLYMA16G07691.1	2.73e-304	845	COG1132@1|root,KOG0058@2759|Eukaryota,37S83@33090|Viridiplantae,3GE5R@35493|Streptophyta,4JMT1@91835|fabids	35493|Streptophyta	Q	ABC transporter B family member 26, chloroplastic-like	-	-	-	ko:K05656,ko:K05657	ko02010,ko04142,map02010,map04142	-	-	-	ko00000,ko00001,ko02000	3.A.1.201,3.A.1.209	-	ABC_membrane,ABC_tran
Ssa01000517.t1	3847.GLYMA19G10300.1	3.65e-152	440	KOG0118@1|root,KOG0118@2759|Eukaryota,37SS5@33090|Viridiplantae,3GB4Z@35493|Streptophyta,4JSA8@91835|fabids	35493|Streptophyta	A	RNA recognition motif	-	GO:0003674,GO:0003676,GO:0003723,GO:0003729,GO:0005488,GO:0005575,GO:0005622,GO:0005623,GO:0005634,GO:0005654,GO:0005737,GO:0005849,GO:0006139,GO:0006378,GO:0006379,GO:0006396,GO:0006397,GO:0006725,GO:0006807,GO:0008150,GO:0008152,GO:0009607,GO:0009719,GO:0009987,GO:0010467,GO:0010494,GO:0016070,GO:0016071,GO:0031123,GO:0031124,GO:0031974,GO:0031981,GO:0032991,GO:0034641,GO:0035770,GO:0036464,GO:…	-	ko:K12741	ko03040,map03040	-	-	-	ko00000,ko00001,ko03019,ko03041	-	-	RRM_1
Ssa01000518.t1	29730.Gorai.001G265400.1	4.79e-56	179	2BR57@1|root,2S1VV@2759|Eukaryota,37VEA@33090|Viridiplantae,3GJFV@35493|Streptophyta	35493|Streptophyta	-	-	-	-	-	-	-	-	-	-	-	-	-	-
Ssa01000519.t1	3885.XP_007140939.1	1.56e-307	855	KOG0610@1|root,KOG0610@2759|Eukaryota,37N8U@33090|Viridiplantae,3GEY3@35493|Streptophyta,4JH5X@91835|fabids	35493|Streptophyta	T	Protein kinase PVPK-1-like	-	-	-	ko:K08286	-	-	-	-	ko00000,ko01000	-	-	Pkinase
Ssa01000520.t2	3847.GLYMA19G10120.1	3.05e-177	502	29CQ9@1|root,2RJU3@2759|Eukaryota,37NXV@33090|Viridiplantae,3GF6T@35493|Streptophyta,4JG34@91835|fabids	35493|Streptophyta	S	Altered inheritance of mitochondria protein 32-like	-	-	-	-	-	-	-	-	-	-	-	Suc_Fer-like
Ssa01000520.t1	3847.GLYMA19G10120.1	4.85e-176	499	29CQ9@1|root,2RJU3@2759|Eukaryota,37NXV@33090|Viridiplantae,3GF6T@35493|Streptophyta,4JG34@91835|fabids	35493|Streptophyta	S	Altered inheritance of mitochondria protein 32-like	-	-	-	-	-	-	-	-	-	-	-	Suc_Fer-like
Ssa01000521.t1	3847.GLYMA16G07590.1	1.43e-128	377	KOG0167@1|root,KOG0167@2759|Eukaryota,37RXS@33090|Viridiplantae,3GATJ@35493|Streptophyta,4JHM5@91835|fabids	35493|Streptophyta	S	U-box domain-containing protein	-	GO:0005575,GO:0005622,GO:0005623,GO:0005737,GO:0009507,GO:0009536,GO:0043226,GO:0043227,GO:0043229,GO:0043231,GO:0044424,GO:0044444,GO:0044464	-	-	-	-	-	-	-	-	-	Arm,KAP
Ssa01000522.t1	29760.VIT_14s0066g00430.t01	8.27e-244	696	KOG2365@1|root,KOG2365@2759|Eukaryota,37J82@33090|Viridiplantae,3GAJ5@35493|Streptophyta	35493|Streptophyta	V	Transmembrane protein 245-like	-	-	-	-	-	-	-	-	-	-	-	AI-2E_transport
Ssa01000523.t1	3827.XP_004515447.1	1.01e-139	402	KOG3045@1|root,KOG3045@2759|Eukaryota,37KY0@33090|Viridiplantae,3GB5X@35493|Streptophyta,4JN6T@91835|fabids	35493|Streptophyta	A	Ribosomal RNA-processing protein	-	GO:0000183,GO:0000785,GO:0000792,GO:0003674,GO:0003824,GO:0005488,GO:0005515,GO:0005575,GO:0005622,GO:0005623,GO:0005634,GO:0005654,GO:0005677,GO:0005694,GO:0005730,GO:0006325,GO:0006342,GO:0006355,GO:0006996,GO:0008150,GO:0008152,GO:0008168,GO:0008757,GO:0009889,GO:0009890,GO:0009892,GO:0009987,GO:0010468,GO:0010556,GO:0010558,GO:0010605,GO:0010629,GO:0016043,GO:0016458,GO:0016740,GO:0016741,GO:…	2.1.1.287	ko:K14850	-	-	-	-	ko00000,ko01000,ko03009	-	-	Methyltransf_8
Ssa01000524.t1	3847.GLYMA19G08920.1	0	1416	KOG0946@1|root,KOG0946@2759|Eukaryota,37SQR@33090|Viridiplantae,3GGH1@35493|Streptophyta,4JFE6@91835|fabids	35493|Streptophyta	U	Golgin candidate	-	GO:0003674,GO:0005215,GO:0005575,GO:0005622,GO:0005623,GO:0005737,GO:0005783,GO:0005794,GO:0005795,GO:0005798,GO:0005829,GO:0006810,GO:0006886,GO:0006888,GO:0007275,GO:0008104,GO:0008150,GO:0008565,GO:0009791,GO:0009987,GO:0012505,GO:0012506,GO:0012507,GO:0015031,GO:0015833,GO:0016020,GO:0016043,GO:0016192,GO:0022406,GO:0030133,GO:0030134,GO:0030135,GO:0030658,GO:0030659,GO:0030660,GO:0030662,GO:…	-	-	-	-	-	-	-	-	-	Uso1_p115_C,Uso1_p115_head
Ssa01000525.t1	3827.XP_004499393.1	1.26e-251	693	28HI1@1|root,2QPVW@2759|Eukaryota,37K8Y@33090|Viridiplantae,3G9RJ@35493|Streptophyta,4JMS6@91835|fabids	35493|Streptophyta	S	Beta-1,4-mannosyl-glycoprotein 4-beta-N-acetylglucosaminyltransferase-like	-	GO:0000139,GO:0005575,GO:0005622,GO:0005623,GO:0005737,GO:0005794,GO:0012505,GO:0016020,GO:0031090,GO:0031984,GO:0043226,GO:0043227,GO:0043229,GO:0043231,GO:0044422,GO:0044424,GO:0044431,GO:0044444,GO:0044446,GO:0044464,GO:0098588,GO:0098791	2.4.1.144	ko:K00737	ko00510,ko01100,map00510,map01100	M00075	R05986	-	ko00000,ko00001,ko00002,ko01000,ko01003	-	GT17	Glyco_transf_17
Ssa01000526.t1	3659.XP_004142782.1	5.53e-206	576	2CMBX@1|root,2QPXH@2759|Eukaryota,37J7M@33090|Viridiplantae,3GFZE@35493|Streptophyta,4JN6N@91835|fabids	35493|Streptophyta	T	Glucuronokinase	-	GO:0000003,GO:0003006,GO:0003674,GO:0003676,GO:0003723,GO:0003727,GO:0003824,GO:0005488,GO:0005575,GO:0005622,GO:0005623,GO:0005737,GO:0005829,GO:0005975,GO:0006020,GO:0006066,GO:0006793,GO:0006796,GO:0008150,GO:0008152,GO:0008187,GO:0008266,GO:0009856,GO:0009987,GO:0016301,GO:0016310,GO:0016740,GO:0016772,GO:0016773,GO:0019751,GO:0022414,GO:0032501,GO:0032502,GO:0042546,GO:0044085,GO:0044237,GO:…	2.7.1.43	ko:K16190	ko00040,ko00053,ko00520,ko01100,map00040,map00053,map00520,map01100	M00014	R01476	RC00002,RC00078	ko00000,ko00001,ko00002,ko01000	-	-	GHMP_kinases_C,GHMP_kinases_N
Ssa01000526.t2	3847.GLYMA05G09130.1	3.02e-166	473	2CMBX@1|root,2QPXH@2759|Eukaryota,37J7M@33090|Viridiplantae,3GFZE@35493|Streptophyta,4JN6N@91835|fabids	35493|Streptophyta	T	Glucuronokinase	-	GO:0000003,GO:0003006,GO:0003674,GO:0003676,GO:0003723,GO:0003727,GO:0003824,GO:0005488,GO:0005575,GO:0005622,GO:0005623,GO:0005737,GO:0005829,GO:0005975,GO:0006020,GO:0006066,GO:0006793,GO:0006796,GO:0008150,GO:0008152,GO:0008187,GO:0008266,GO:0009856,GO:0009987,GO:0016301,GO:0016310,GO:0016740,GO:0016772,GO:0016773,GO:0019751,GO:0022414,GO:0032501,GO:0032502,GO:0042546,GO:0044085,GO:0044237,GO:…	2.7.1.43	ko:K16190	ko00040,ko00053,ko00520,ko01100,map00040,map00053,map00520,map01100	M00014	R01476	RC00002,RC00078	ko00000,ko00001,ko00002,ko01000	-	-	GHMP_kinases_C,GHMP_kinases_N
Ssa01000527.t1	3760.EMJ18620	4.23e-57	185	2C0XP@1|root,2S2NI@2759|Eukaryota,37VKN@33090|Viridiplantae,3GJPM@35493|Streptophyta,4JQPY@91835|fabids	35493|Streptophyta	-	-	-	-	-	-	-	-	-	-	-	-	-	-
Ssa01000528.t1	3649.evm.model.supercontig_108.78	4.02e-255	717	COG0130@1|root,KOG2529@2759|Eukaryota,37N06@33090|Viridiplantae,3GEFU@35493|Streptophyta,3HNFQ@3699|Brassicales	35493|Streptophyta	J	TruB family pseudouridylate synthase (N terminal domain)	-	-	5.4.99.25	ko:K03177	-	-	-	-	ko00000,ko01000,ko03016	-	-	TruB_C_2,TruB_N
Ssa01000528.t2	3649.evm.model.supercontig_108.78	1.35e-255	716	COG0130@1|root,KOG2529@2759|Eukaryota,37N06@33090|Viridiplantae,3GEFU@35493|Streptophyta,3HNFQ@3699|Brassicales	35493|Streptophyta	J	TruB family pseudouridylate synthase (N terminal domain)	-	-	5.4.99.25	ko:K03177	-	-	-	-	ko00000,ko01000,ko03016	-	-	TruB_C_2,TruB_N
Ssa01000529.t1	57918.XP_004288485.1	1.79e-132	382	KOG3038@1|root,KOG3038@2759|Eukaryota,37MTB@33090|Viridiplantae,3GD5Q@35493|Streptophyta,4JI4F@91835|fabids	35493|Streptophyta	S	SGF29 tudor-like domain	-	GO:0005575,GO:0005622,GO:0005623,GO:0005634,GO:0006325,GO:0006464,GO:0006473,GO:0006475,GO:0006807,GO:0006950,GO:0006970,GO:0006996,GO:0008150,GO:0008152,GO:0009628,GO:0009651,GO:0009987,GO:0016043,GO:0016569,GO:0016570,GO:0016573,GO:0018193,GO:0018205,GO:0018393,GO:0018394,GO:0019538,GO:0036211,GO:0043170,GO:0043226,GO:0043227,GO:0043229,GO:0043231,GO:0043412,GO:0043543,GO:0043966,GO:0043967,GO:…	-	ko:K11364	-	-	-	-	ko00000,ko03021,ko03036	-	-	DUF1325
Ssa01000530.t1	3983.cassava4.1_003581m	0	1131	28K1P@1|root,2QUM5@2759|Eukaryota,37NGH@33090|Viridiplantae,3G7PC@35493|Streptophyta,4JF1I@91835|fabids	35493|Streptophyta	S	isoform X1	-	-	-	-	-	-	-	-	-	-	-	-
Ssa01000531.t1	85681.XP_006446643.1	1.22e-104	310	28J0B@1|root,2QRC9@2759|Eukaryota,37R2F@33090|Viridiplantae,3GFC1@35493|Streptophyta	35493|Streptophyta	S	surfeit locus protein	-	-	-	-	-	-	-	-	-	-	-	SURF2
Ssa01000532.t1	3847.GLYMA16G07430.1	6.51e-197	555	28K72@1|root,2R7MU@2759|Eukaryota,37Y47@33090|Viridiplantae,3GHNQ@35493|Streptophyta,4JT4A@91835|fabids	35493|Streptophyta	S	Belongs to the 'GDSL' lipolytic enzyme family	-	GO:0005575,GO:0005618,GO:0005623,GO:0005911,GO:0009505,GO:0009506,GO:0030054,GO:0030312,GO:0044464,GO:0055044,GO:0071944	-	-	-	-	-	-	-	-	-	Lipase_GDSL
Ssa01000533.t1	3847.GLYMA16G07450.1	2.57e-228	634	28K72@1|root,2QRBK@2759|Eukaryota,37SA3@33090|Viridiplantae,3G989@35493|Streptophyta,4JFUV@91835|fabids	35493|Streptophyta	S	Belongs to the 'GDSL' lipolytic enzyme family	-	GO:0005575,GO:0005618,GO:0005623,GO:0005911,GO:0009505,GO:0009506,GO:0030054,GO:0030312,GO:0044464,GO:0055044,GO:0071944	-	-	-	-	-	-	-	-	-	Lipase_GDSL
Ssa01000534.t1	3827.XP_004489546.1	1.8e-255	709	KOG1327@1|root,KOG1327@2759|Eukaryota,37IJH@33090|Viridiplantae,3GCD1@35493|Streptophyta,4JIEZ@91835|fabids	35493|Streptophyta	O	E3 ubiquitin-protein ligase	-	GO:0003674,GO:0003824,GO:0004842,GO:0005575,GO:0005622,GO:0005623,GO:0005634,GO:0005886,GO:0006464,GO:0006725,GO:0006807,GO:0008150,GO:0008152,GO:0009308,GO:0009690,GO:0009850,GO:0009987,GO:0010817,GO:0016020,GO:0016567,GO:0016740,GO:0019538,GO:0019787,GO:0032446,GO:0034754,GO:0036211,GO:0042445,GO:0043170,GO:0043226,GO:0043227,GO:0043229,GO:0043231,GO:0043412,GO:0044237,GO:0044238,GO:0044260,GO:…	2.3.2.27	ko:K16280	-	-	-	-	ko00000,ko01000,ko04121	-	-	Copine,zf-C3HC4_3
Ssa01000535.t1	3983.cassava4.1_007669m	1.43e-250	696	KOG4197@1|root,KOG4197@2759|Eukaryota,37J1I@33090|Viridiplantae,3G8R3@35493|Streptophyta,4JG6U@91835|fabids	35493|Streptophyta	S	Pentatricopeptide repeat-containing protein At4g35850	-	GO:0003674,GO:0003676,GO:0003723,GO:0003824,GO:0004518,GO:0004519,GO:0005488,GO:0005575,GO:0005622,GO:0005623,GO:0005737,GO:0005739,GO:0006139,GO:0006725,GO:0006807,GO:0008150,GO:0008152,GO:0009451,GO:0009987,GO:0016070,GO:0016787,GO:0016788,GO:0034641,GO:0043170,GO:0043226,GO:0043227,GO:0043229,GO:0043231,GO:0043412,GO:0044237,GO:0044238,GO:0044424,GO:0044444,GO:0044464,GO:0046483,GO:0071704,GO:…	-	-	-	-	-	-	-	-	-	PPR,PPR_2,PPR_3
Ssa01000536.t1	3847.GLYMA05G24130.2	5.62e-106	319	KOG3152@1|root,KOG3152@2759|Eukaryota,37MCS@33090|Viridiplantae,3G7QV@35493|Streptophyta,4JE50@91835|fabids	35493|Streptophyta	K	Pre-rRNA-processing protein	-	GO:0000028,GO:0000447,GO:0000460,GO:0000462,GO:0000466,GO:0000469,GO:0000472,GO:0000478,GO:0000479,GO:0000480,GO:0000966,GO:0000967,GO:0003674,GO:0003676,GO:0003723,GO:0005488,GO:0006139,GO:0006364,GO:0006396,GO:0006725,GO:0006807,GO:0006996,GO:0008150,GO:0008152,GO:0009987,GO:0010467,GO:0016043,GO:0016070,GO:0016072,GO:0022607,GO:0022613,GO:0022618,GO:0030490,GO:0034462,GO:0034470,GO:0034471,GO:…	-	ko:K14785	-	-	-	-	ko00000,ko03009	-	-	RRM_1
Ssa01000537.t1	3847.GLYMA05G24120.2	2.06e-144	407	COG1100@1|root,KOG0098@2759|Eukaryota,37P81@33090|Viridiplantae,3GF17@35493|Streptophyta,4JJQR@91835|fabids	35493|Streptophyta	U	Ras-related protein	-	GO:0000166,GO:0001882,GO:0001883,GO:0003674,GO:0005488,GO:0005525,GO:0005575,GO:0005622,GO:0005623,GO:0005737,GO:0005768,GO:0008150,GO:0009507,GO:0009536,GO:0012505,GO:0017076,GO:0019001,GO:0030100,GO:0031410,GO:0031982,GO:0032549,GO:0032550,GO:0032553,GO:0032555,GO:0032561,GO:0032879,GO:0035639,GO:0036094,GO:0043167,GO:0043168,GO:0043226,GO:0043227,GO:0043229,GO:0043231,GO:0044424,GO:0044444,GO:…	-	ko:K07877	ko04152,map04152	-	-	-	ko00000,ko00001,ko04031,ko04131,ko04147	-	-	Ras
Ssa01000538.t1	3847.GLYMA02G46860.5	6.51e-180	502	COG0638@1|root,KOG0173@2759|Eukaryota,37RDB@33090|Viridiplantae,3GC54@35493|Streptophyta,4JRYU@91835|fabids	35493|Streptophyta	O	The proteasome is a multicatalytic proteinase complex which is characterized by its ability to cleave peptides with Arg, Phe, Tyr, Leu, and Glu adjacent to the leaving group at neutral or slightly basic pH	-	GO:0000502,GO:0005575,GO:0005622,GO:0005623,GO:0005839,GO:0019774,GO:0032991,GO:0044424,GO:0044464,GO:1902494,GO:1905368,GO:1905369	3.4.25.1	ko:K02739	ko03050,map03050	M00340	-	-	ko00000,ko00001,ko00002,ko01000,ko01002,ko03051	-	-	Proteasome
Ssa01000539.t1	3880.AES78542	6.1e-227	638	COG2124@1|root,KOG0157@2759|Eukaryota,37M20@33090|Viridiplantae,3GA9S@35493|Streptophyta,4JI7Q@91835|fabids	35493|Streptophyta	Q	Belongs to the cytochrome P450 family	-	GO:0003674,GO:0003824,GO:0004497,GO:0005488,GO:0006629,GO:0006694,GO:0007275,GO:0008150,GO:0008152,GO:0008202,GO:0008610,GO:0009058,GO:0009314,GO:0009416,GO:0009628,GO:0009642,GO:0009646,GO:0009647,GO:0009791,GO:0010268,GO:0010817,GO:0016125,GO:0016128,GO:0016129,GO:0016131,GO:0016132,GO:0016491,GO:0020037,GO:0032501,GO:0032502,GO:0042445,GO:0042446,GO:0042592,GO:0044238,GO:0046906,GO:0048037,GO:…	-	ko:K12639	ko00905,ko01100,ko01110,map00905,map01100,map01110	M00371	-	-	ko00000,ko00001,ko00002,ko00199,ko01000	-	-	p450
Ssa01000540.t1	3885.XP_007152576.1	8.05e-69	219	COG1028@1|root,KOG1208@2759|Eukaryota,37RWK@33090|Viridiplantae,3GA0U@35493|Streptophyta,4JGMW@91835|fabids	35493|Streptophyta	Q	Belongs to the short-chain dehydrogenases reductases (SDR) family	FEY	GO:0001523,GO:0003674,GO:0003824,GO:0004033,GO:0004745,GO:0005575,GO:0005622,GO:0005623,GO:0005737,GO:0005783,GO:0005789,GO:0006066,GO:0006081,GO:0006629,GO:0006720,GO:0006721,GO:0008106,GO:0008150,GO:0008152,GO:0009888,GO:0009987,GO:0010073,GO:0010817,GO:0012505,GO:0016020,GO:0016101,GO:0016491,GO:0016614,GO:0016616,GO:0031984,GO:0032501,GO:0032502,GO:0034308,GO:0034754,GO:0042175,GO:0042445,GO:…	-	-	-	-	-	-	-	-	-	adh_short
Ssa01000541.t1	3880.AES78542	2.71e-223	629	COG2124@1|root,KOG0157@2759|Eukaryota,37M20@33090|Viridiplantae,3GA9S@35493|Streptophyta,4JI7Q@91835|fabids	35493|Streptophyta	Q	Belongs to the cytochrome P450 family	-	GO:0003674,GO:0003824,GO:0004497,GO:0005488,GO:0006629,GO:0006694,GO:0007275,GO:0008150,GO:0008152,GO:0008202,GO:0008610,GO:0009058,GO:0009314,GO:0009416,GO:0009628,GO:0009642,GO:0009646,GO:0009647,GO:0009791,GO:0010268,GO:0010817,GO:0016125,GO:0016128,GO:0016129,GO:0016131,GO:0016132,GO:0016491,GO:0020037,GO:0032501,GO:0032502,GO:0042445,GO:0042446,GO:0042592,GO:0044238,GO:0046906,GO:0048037,GO:…	-	ko:K12639	ko00905,ko01100,ko01110,map00905,map01100,map01110	M00371	-	-	ko00000,ko00001,ko00002,ko00199,ko01000	-	-	p450
Ssa01000542.t1	4530.OS03T0177400-01	0	885	COG5256@1|root,KOG0052@2759|Eukaryota,37KSK@33090|Viridiplantae,3GAB2@35493|Streptophyta,3KQUP@4447|Liliopsida,3IG71@38820|Poales	35493|Streptophyta	J	This protein promotes the GTP-dependent binding of aminoacyl-tRNA to the A-site of ribosomes during protein biosynthesis	-	GO:0003674,GO:0003676,GO:0003723,GO:0003746,GO:0003824,GO:0003924,GO:0005488,GO:0005575,GO:0005622,GO:0005623,GO:0005737,GO:0006412,GO:0006414,GO:0006518,GO:0006807,GO:0008135,GO:0008150,GO:0008152,GO:0009058,GO:0009059,GO:0009987,GO:0010467,GO:0016462,GO:0016787,GO:0016817,GO:0016818,GO:0017111,GO:0019538,GO:0034641,GO:0034645,GO:0043043,GO:0043170,GO:0043603,GO:0043604,GO:0044237,GO:0044238,GO:…	-	ko:K03231	ko03013,ko05134,map03013,map05134	-	-	-	ko00000,ko00001,ko03012,ko03016,ko03019,ko04131,ko04147	-	-	GTP_EFTU,GTP_EFTU_D2,GTP_EFTU_D3
Ssa01000543.t2	3880.AES74998	5.21e-33	122	2C1UC@1|root,2SAEV@2759|Eukaryota,37XAE@33090|Viridiplantae,3GMBP@35493|Streptophyta,4JV39@91835|fabids	35493|Streptophyta	-	-	-	-	-	-	-	-	-	-	-	-	-	-
Ssa01000543.t1	3880.AES74998	2.42e-33	122	2C1UC@1|root,2SAEV@2759|Eukaryota,37XAE@33090|Viridiplantae,3GMBP@35493|Streptophyta,4JV39@91835|fabids	35493|Streptophyta	-	-	-	-	-	-	-	-	-	-	-	-	-	-
Ssa01000544.t1	3880.AES78512	0	1076	28JSW@1|root,2QRW8@2759|Eukaryota,37RZI@33090|Viridiplantae,3GA39@35493|Streptophyta,4JKJA@91835|fabids	35493|Streptophyta	S	Sieve element occlusion N-terminus	-	GO:0003674,GO:0005488,GO:0005515,GO:0008150,GO:0009888,GO:0010087,GO:0010088,GO:0032502,GO:0042802,GO:0042803,GO:0043621,GO:0046983,GO:0048856	-	-	-	-	-	-	-	-	-	SEO_C,SEO_N
Ssa01000545.t1	3641.EOY02593	2.38e-203	570	COG1073@1|root,KOG1552@2759|Eukaryota,37HYX@33090|Viridiplantae,3GB6C@35493|Streptophyta	35493|Streptophyta	L	Alpha beta hydrolase domain-containing protein	-	-	-	-	-	-	-	-	-	-	-	Hydrolase_4
Ssa01000545.t2	3641.EOY02593	1.41e-204	574	COG1073@1|root,KOG1552@2759|Eukaryota,37HYX@33090|Viridiplantae,3GB6C@35493|Streptophyta	35493|Streptophyta	L	Alpha beta hydrolase domain-containing protein	-	-	-	-	-	-	-	-	-	-	-	Hydrolase_4
Ssa01000546.t1	3641.EOY02594	1.87e-210	591	COG0240@1|root,KOG2711@2759|Eukaryota,37HV9@33090|Viridiplantae,3G7PR@35493|Streptophyta	35493|Streptophyta	C	Glycerol-3-phosphate dehydrogenase (NAD	-	-	1.1.1.8	ko:K00006	ko00564,ko01110,ko04011,map00564,map01110,map04011	-	R00842	RC00029	ko00000,ko00001,ko01000	-	-	NAD_Gly3P_dh_C,NAD_Gly3P_dh_N
Ssa01000546.t2	3641.EOY02594	2.54e-210	590	COG0240@1|root,KOG2711@2759|Eukaryota,37HV9@33090|Viridiplantae,3G7PR@35493|Streptophyta	35493|Streptophyta	C	Glycerol-3-phosphate dehydrogenase (NAD	-	-	1.1.1.8	ko:K00006	ko00564,ko01110,ko04011,map00564,map01110,map04011	-	R00842	RC00029	ko00000,ko00001,ko01000	-	-	NAD_Gly3P_dh_C,NAD_Gly3P_dh_N
Ssa01000547.t1	4432.XP_010250930.1	1.17e-246	682	COG3866@1|root,2QQ5F@2759|Eukaryota,37HIU@33090|Viridiplantae,3G7PT@35493|Streptophyta	35493|Streptophyta	G	Pectate lyase	-	-	4.2.2.2	ko:K01728	ko00040,ko02024,map00040,map02024	-	R02361,R06240	RC00049,RC00705	ko00000,ko00001,ko01000	-	-	Pec_lyase_C
Ssa01000548.t1	3885.XP_007140857.1	4.95e-63	209	COG5641@1|root,KOG1601@2759|Eukaryota,37UHE@33090|Viridiplantae,3GI7C@35493|Streptophyta,4JPV8@91835|fabids	35493|Streptophyta	K	Zinc finger protein CONSTANS-like	-	GO:0005575,GO:0005622,GO:0005623,GO:0005634,GO:0006355,GO:0006605,GO:0006810,GO:0006886,GO:0008104,GO:0008150,GO:0009889,GO:0010468,GO:0010556,GO:0015031,GO:0015833,GO:0019219,GO:0019222,GO:0031323,GO:0031326,GO:0033036,GO:0033365,GO:0034613,GO:0042886,GO:0043226,GO:0043227,GO:0043229,GO:0043231,GO:0044424,GO:0044464,GO:0045036,GO:0045184,GO:0046907,GO:0050789,GO:0050794,GO:0051171,GO:0051179,GO:…	-	-	-	-	-	-	-	-	-	CCT
Ssa01000550.t1	3847.GLYMA19G07600.1	1.49e-70	216	2ATCU@1|root,2RZRT@2759|Eukaryota,37UNT@33090|Viridiplantae,3GJZF@35493|Streptophyta,4JTY0@91835|fabids	35493|Streptophyta	O	Ubiquitin homologues	-	-	-	-	-	-	-	-	-	-	-	ubiquitin
Ssa01000551.t1	3656.XP_008450036.1	8.56e-182	508	COG0479@1|root,KOG3049@2759|Eukaryota,37Q7U@33090|Viridiplantae,3G7PZ@35493|Streptophyta,4JKQ5@91835|fabids	35493|Streptophyta	C	Iron-sulfur protein (IP) subunit of succinate dehydrogenase (SDH) that is involved in complex II of the mitochondrial electron transport chain and is responsible for transferring electrons from succinate to ubiquinone (coenzyme Q)	SDH2-1	GO:0000104,GO:0003674,GO:0003824,GO:0005488,GO:0005575,GO:0005622,GO:0005623,GO:0005737,GO:0005739,GO:0005740,GO:0005743,GO:0005746,GO:0005749,GO:0006091,GO:0006119,GO:0006121,GO:0006139,GO:0006163,GO:0006725,GO:0006753,GO:0006793,GO:0006796,GO:0006807,GO:0008150,GO:0008152,GO:0008270,GO:0009055,GO:0009060,GO:0009117,GO:0009123,GO:0009126,GO:0009141,GO:0009144,GO:0009150,GO:0009161,GO:0009167,GO:…	1.3.5.1	ko:K00235	ko00020,ko00190,ko01100,ko01110,ko01120,ko01130,ko01200,ko04714,ko04932,ko05010,ko05012,ko05016,map00020,map00190,map01100,map01110,map01120,map01130,map01200,map04714,map04932,map05010,map05012,map05016	M00009,M00011,M00148	R02164	RC00045	ko00000,ko00001,ko00002,ko01000	-	-	Fer2_3,Fer4_17,Ribosomal_S14
Ssa01000552.t1	3847.GLYMA19G07740.1	6.27e-138	397	KOG3145@1|root,KOG3145@2759|Eukaryota,37S1S@33090|Viridiplantae,3G9YD@35493|Streptophyta,4JF5Z@91835|fabids	35493|Streptophyta	E	Cystinosin homolog	-	-	-	ko:K12386	ko04142,map04142	-	-	-	ko00000,ko00001,ko04147	-	-	PQ-loop
Ssa01000553.t1	3847.GLYMA19G07740.1	6.22e-143	410	KOG3145@1|root,KOG3145@2759|Eukaryota,37S1S@33090|Viridiplantae,3G9YD@35493|Streptophyta,4JF5Z@91835|fabids	35493|Streptophyta	E	Cystinosin homolog	-	-	-	ko:K12386	ko04142,map04142	-	-	-	ko00000,ko00001,ko04147	-	-	PQ-loop
Ssa01000554.t1	3847.GLYMA05G06351.1	0	1123	28P7B@1|root,2QVUC@2759|Eukaryota,37T6G@33090|Viridiplantae,3GXAJ@35493|Streptophyta,4JS1E@91835|fabids	35493|Streptophyta	S	FAR1 DNA-binding domain	-	-	-	ko:K17604	-	-	-	-	ko00000,ko01009	-	-	FAR1,MULE,SWIM
Ssa01000555.t1	3885.XP_007151573.1	5.55e-148	444	28P7B@1|root,2QVUC@2759|Eukaryota,37T6G@33090|Viridiplantae,3GXAJ@35493|Streptophyta,4JS1E@91835|fabids	35493|Streptophyta	S	FAR1 DNA-binding domain	-	-	-	ko:K17604	-	-	-	-	ko00000,ko01009	-	-	FAR1,MULE,SWIM
Ssa01000556.t1	3847.GLYMA05G06371.1	1.09e-142	434	28MUK@1|root,2QUCW@2759|Eukaryota,37HR6@33090|Viridiplantae,3G81S@35493|Streptophyta,4JF36@91835|fabids	35493|Streptophyta	S	Targeting protein for Xklp2 (TPX2)	-	-	-	-	-	-	-	-	-	-	-	TPX2
Ssa01000557.t1	3847.GLYMA16G06900.1	1.17e-124	362	COG5147@1|root,KOG0048@2759|Eukaryota,37KTM@33090|Viridiplantae,3G83I@35493|Streptophyta,4JPAX@91835|fabids	35493|Streptophyta	K	Myb-related protein	-	-	-	ko:K09422	-	-	-	-	ko00000,ko03000	-	-	DUF971,Myb_DNA-binding
Ssa01000558.t1	3694.POPTR_0001s36210.1	7.98e-215	628	COG2802@1|root,KOG4159@2759|Eukaryota,388R2@33090|Viridiplantae,3G77C@35493|Streptophyta,4JHEH@91835|fabids	35493|Streptophyta	O	Glycosyl transferase family 2	-	-	-	-	-	-	-	-	-	-	-	Glyco_transf_92,zf-C3HC4
Ssa01000559.t1	85681.XP_006447176.1	6.24e-92	303	COG2802@1|root,KOG4159@2759|Eukaryota,388R2@33090|Viridiplantae,3G77C@35493|Streptophyta	35493|Streptophyta	O	UPF0392 protein	-	-	-	-	-	-	-	-	-	-	-	Glyco_transf_92,zf-C3HC4
Ssa01000560.t1	981085.XP_010111638.1	3.21e-249	693	COG0657@1|root,KOG1515@2759|Eukaryota,37N4P@33090|Viridiplantae,3GEM0@35493|Streptophyta,4JDTT@91835|fabids	35493|Streptophyta	V	carboxylesterase 11	-	GO:0003674,GO:0003824,GO:0008150,GO:0008152,GO:0009056,GO:0016787	-	-	-	-	-	-	-	-	-	Abhydrolase_3
Ssa01000561.t1	3847.GLYMA19G24375.2	0	879	KOG2085@1|root,KOG2085@2759|Eukaryota,37HSY@33090|Viridiplantae,3G8QI@35493|Streptophyta,4JJB2@91835|fabids	35493|Streptophyta	T	The B regulatory subunit might modulate substrate selectivity and catalytic activity, and also might direct the localization of the catalytic enzyme to a particular subcellular compartment	-	GO:0005575,GO:0005622,GO:0005623,GO:0005634,GO:0005730,GO:0005737,GO:0031974,GO:0031981,GO:0043226,GO:0043227,GO:0043228,GO:0043229,GO:0043231,GO:0043232,GO:0043233,GO:0044422,GO:0044424,GO:0044428,GO:0044446,GO:0044464,GO:0070013	-	ko:K11584	ko03015,ko04071,ko04113,ko04114,ko04151,ko04152,ko04261,ko04728,ko05165,map03015,map04071,map04113,map04114,map04151,map04152,map04261,map04728,map05165	-	-	-	ko00000,ko00001,ko01009,ko03036	-	-	B56
Ssa01000563.t1	3847.GLYMA05G06480.1	0	1218	28N2G@1|root,2QUMJ@2759|Eukaryota,37QPN@33090|Viridiplantae,3G7IN@35493|Streptophyta,4JEKE@91835|fabids	35493|Streptophyta	S	HAUS augmin-like complex subunit 6 N-terminus	-	GO:0000226,GO:0003674,GO:0005488,GO:0005515,GO:0005575,GO:0005622,GO:0005623,GO:0005737,GO:0005819,GO:0005856,GO:0006996,GO:0007010,GO:0007017,GO:0007275,GO:0008017,GO:0008092,GO:0008150,GO:0009524,GO:0009553,GO:0009555,GO:0009561,GO:0009987,GO:0015630,GO:0015631,GO:0016043,GO:0032501,GO:0032502,GO:0043226,GO:0043228,GO:0043229,GO:0043232,GO:0044422,GO:0044424,GO:0044430,GO:0044444,GO:0044446,GO:…	-	-	-	-	-	-	-	-	-	HAUS6_N
Ssa01000563.t2	3847.GLYMA05G06480.1	0	1209	28N2G@1|root,2QUMJ@2759|Eukaryota,37QPN@33090|Viridiplantae,3G7IN@35493|Streptophyta,4JEKE@91835|fabids	35493|Streptophyta	S	HAUS augmin-like complex subunit 6 N-terminus	-	GO:0000226,GO:0003674,GO:0005488,GO:0005515,GO:0005575,GO:0005622,GO:0005623,GO:0005737,GO:0005819,GO:0005856,GO:0006996,GO:0007010,GO:0007017,GO:0007275,GO:0008017,GO:0008092,GO:0008150,GO:0009524,GO:0009553,GO:0009555,GO:0009561,GO:0009987,GO:0015630,GO:0015631,GO:0016043,GO:0032501,GO:0032502,GO:0043226,GO:0043228,GO:0043229,GO:0043232,GO:0044422,GO:0044424,GO:0044430,GO:0044444,GO:0044446,GO:…	-	-	-	-	-	-	-	-	-	HAUS6_N
Ssa01000564.t1	3847.GLYMA16G06840.1	1.43e-127	369	KOG2699@1|root,KOG2699@2759|Eukaryota,37RNB@33090|Viridiplantae,3G7FN@35493|Streptophyta,4JJJZ@91835|fabids	35493|Streptophyta	O	Tether containing UBX domain for	PUX1	GO:0003674,GO:0005488,GO:0005515,GO:0005575,GO:0005622,GO:0005623,GO:0005634,GO:0005654,GO:0005886,GO:0008150,GO:0009893,GO:0009987,GO:0010604,GO:0016020,GO:0016043,GO:0019222,GO:0019899,GO:0022411,GO:0031323,GO:0031325,GO:0031399,GO:0031401,GO:0031974,GO:0031981,GO:0032268,GO:0032270,GO:0032501,GO:0032502,GO:0032984,GO:0035265,GO:0040007,GO:0043226,GO:0043227,GO:0043229,GO:0043231,GO:0043233,GO:…	-	ko:K15627	ko05202,map05202	-	-	-	ko00000,ko00001	-	-	UBX
Ssa01000564.t2	3847.GLYMA16G06840.1	1.13e-126	366	KOG2699@1|root,KOG2699@2759|Eukaryota,37RNB@33090|Viridiplantae,3G7FN@35493|Streptophyta,4JJJZ@91835|fabids	35493|Streptophyta	O	Tether containing UBX domain for	PUX1	GO:0003674,GO:0005488,GO:0005515,GO:0005575,GO:0005622,GO:0005623,GO:0005634,GO:0005654,GO:0005886,GO:0008150,GO:0009893,GO:0009987,GO:0010604,GO:0016020,GO:0016043,GO:0019222,GO:0019899,GO:0022411,GO:0031323,GO:0031325,GO:0031399,GO:0031401,GO:0031974,GO:0031981,GO:0032268,GO:0032270,GO:0032501,GO:0032502,GO:0032984,GO:0035265,GO:0040007,GO:0043226,GO:0043227,GO:0043229,GO:0043231,GO:0043233,GO:…	-	ko:K15627	ko05202,map05202	-	-	-	ko00000,ko00001	-	-	UBX
Ssa01000565.t1	3847.GLYMA16G06850.1	0	924	COG0364@1|root,KOG0563@2759|Eukaryota,37K4E@33090|Viridiplantae,3GBQX@35493|Streptophyta,4JHJV@91835|fabids	35493|Streptophyta	G	Catalyzes the rate-limiting step of the oxidative pentose-phosphate pathway, which represents a route for the dissimilation of carbohydrates besides glycolysis	G6PD5	GO:0003674,GO:0003824,GO:0004345,GO:0005575,GO:0005622,GO:0005623,GO:0005737,GO:0005829,GO:0005975,GO:0005996,GO:0006006,GO:0006081,GO:0006098,GO:0006139,GO:0006725,GO:0006732,GO:0006733,GO:0006739,GO:0006753,GO:0006793,GO:0006796,GO:0006807,GO:0008150,GO:0008152,GO:0009051,GO:0009117,GO:0009507,GO:0009536,GO:0009987,GO:0010035,GO:0010038,GO:0016491,GO:0016614,GO:0016616,GO:0019318,GO:0019362,GO:…	1.1.1.363,1.1.1.49	ko:K00036	ko00030,ko00480,ko01100,ko01110,ko01120,ko01130,ko01200,ko05230,map00030,map00480,map01100,map01110,map01120,map01130,map01200,map05230	M00004,M00006,M00008	R00835,R02736,R10907	RC00001,RC00066	ko00000,ko00001,ko00002,ko01000,ko04147	-	-	G6PD_C,G6PD_N
Ssa01000565.t2	3847.GLYMA16G06850.1	0	940	COG0364@1|root,KOG0563@2759|Eukaryota,37K4E@33090|Viridiplantae,3GBQX@35493|Streptophyta,4JHJV@91835|fabids	35493|Streptophyta	G	Catalyzes the rate-limiting step of the oxidative pentose-phosphate pathway, which represents a route for the dissimilation of carbohydrates besides glycolysis	G6PD5	GO:0003674,GO:0003824,GO:0004345,GO:0005575,GO:0005622,GO:0005623,GO:0005737,GO:0005829,GO:0005975,GO:0005996,GO:0006006,GO:0006081,GO:0006098,GO:0006139,GO:0006725,GO:0006732,GO:0006733,GO:0006739,GO:0006753,GO:0006793,GO:0006796,GO:0006807,GO:0008150,GO:0008152,GO:0009051,GO:0009117,GO:0009507,GO:0009536,GO:0009987,GO:0010035,GO:0010038,GO:0016491,GO:0016614,GO:0016616,GO:0019318,GO:0019362,GO:…	1.1.1.363,1.1.1.49	ko:K00036	ko00030,ko00480,ko01100,ko01110,ko01120,ko01130,ko01200,ko05230,map00030,map00480,map01100,map01110,map01120,map01130,map01200,map05230	M00004,M00006,M00008	R00835,R02736,R10907	RC00001,RC00066	ko00000,ko00001,ko00002,ko01000,ko04147	-	-	G6PD_C,G6PD_N
Ssa01000566.t1	3847.GLYMA05G06540.2	2.25e-181	524	28J5S@1|root,2QRHX@2759|Eukaryota,37SZE@33090|Viridiplantae,3G8KM@35493|Streptophyta,4JT1K@91835|fabids	35493|Streptophyta	S	F-box protein SKIP14-like	-	-	-	-	-	-	-	-	-	-	-	F-box-like
Ssa01000567.t1	3885.XP_007161015.1	5.12e-228	631	COG0489@1|root,KOG3022@2759|Eukaryota,37M9R@33090|Viridiplantae,3G9B4@35493|Streptophyta,4JHSH@91835|fabids	35493|Streptophyta	D	Component of the cytosolic iron-sulfur (Fe-S) protein assembly (CIA) machinery. Required for maturation of extramitochondrial Fe-S proteins. Functions as Fe-S scaffold, mediating the de novo assembly of an Fe-S cluster and its transfer to target apoproteins. Essential for embryo development	NBP35	GO:0003674,GO:0005488,GO:0005515,GO:0005575,GO:0005622,GO:0005623,GO:0005737,GO:0005829,GO:0042802,GO:0042803,GO:0044424,GO:0044444,GO:0044464,GO:0046983,GO:0048037,GO:0051536,GO:0051540	-	-	-	-	-	-	-	-	-	ParA
Ssa01000568.t1	3885.XP_007151557.1	0	931	COG0666@1|root,KOG0504@2759|Eukaryota,37RCU@33090|Viridiplantae,3G82Z@35493|Streptophyta,4JEQ0@91835|fabids	35493|Streptophyta	M	Ankyrin repeats (many copies)	-	-	-	-	-	-	-	-	-	-	-	Ank,Ank_2,Ank_4,Ank_5
Ssa01000568.t2	3885.XP_007151557.1	0	967	COG0666@1|root,KOG0504@2759|Eukaryota,37RCU@33090|Viridiplantae,3G82Z@35493|Streptophyta,4JEQ0@91835|fabids	35493|Streptophyta	M	Ankyrin repeats (many copies)	-	-	-	-	-	-	-	-	-	-	-	Ank,Ank_2,Ank_4,Ank_5
Ssa01000569.t1	3847.GLYMA16G06750.2	2.48e-281	774	COG0814@1|root,KOG1303@2759|Eukaryota,37S1T@33090|Viridiplantae,3G766@35493|Streptophyta,4JRQF@91835|fabids	35493|Streptophyta	E	Lysine histidine transporter	-	-	-	-	-	-	-	-	-	-	-	Aa_trans
Ssa01000570.t1	3827.XP_004514799.1	1.41e-266	736	COG0814@1|root,KOG1303@2759|Eukaryota,37S1T@33090|Viridiplantae,3G766@35493|Streptophyta	35493|Streptophyta	E	lysine histidine transporter	-	-	-	-	-	-	-	-	-	-	-	Aa_trans
Ssa01000571.t1	102107.XP_008231172.1	1.01e-119	348	28MFW@1|root,2QTZA@2759|Eukaryota,37M43@33090|Viridiplantae,3GAHS@35493|Streptophyta,4JH51@91835|fabids	35493|Streptophyta	S	TRAM, LAG1 and CLN8 homology domains.	-	-	-	-	-	-	-	-	-	-	-	DUF573,TRAM_LAG1_CLN8
Ssa01000572.t1	3847.GLYMA16G06710.1	0	996	COG5076@1|root,KOG1474@2759|Eukaryota,37NP6@33090|Viridiplantae,3G76T@35493|Streptophyta,4JFP0@91835|fabids	35493|Streptophyta	K	Transcription factor	-	GO:0005575,GO:0005622,GO:0005623,GO:0005737,GO:0006355,GO:0008150,GO:0009507,GO:0009536,GO:0009889,GO:0009891,GO:0009893,GO:0010468,GO:0010556,GO:0010557,GO:0010604,GO:0010628,GO:0019219,GO:0019222,GO:0031323,GO:0031325,GO:0031326,GO:0031328,GO:0043226,GO:0043227,GO:0043229,GO:0043231,GO:0044424,GO:0044444,GO:0044464,GO:0045893,GO:0045935,GO:0048518,GO:0048522,GO:0050789,GO:0050794,GO:0051171,GO:…	-	ko:K11724	-	-	-	-	ko00000,ko01001,ko03036	-	-	BET,Bromodomain
Ssa01000573.t1	3983.cassava4.1_013070m	8.52e-67	218	29FU5@1|root,2S057@2759|Eukaryota,37TZD@33090|Viridiplantae,3GI8Q@35493|Streptophyta,4JPHA@91835|fabids	35493|Streptophyta	S	BEST Arabidopsis thaliana protein match is	-	-	-	-	-	-	-	-	-	-	-	-
Ssa01000574.t1	3847.GLYMA19G25160.2	0	1198	28IBX@1|root,2QQNG@2759|Eukaryota,37I4Z@33090|Viridiplantae,3G7V8@35493|Streptophyta,4JK1F@91835|fabids	35493|Streptophyta	S	N-terminal C2 in EEIG1 and EHBP1 proteins	-	-	-	-	-	-	-	-	-	-	-	NT-C2
Ssa01000575.t1	3847.GLYMA16G06410.1	8.87e-108	320	COG0563@1|root,KOG3078@2759|Eukaryota,37RA0@33090|Viridiplantae,3GFUB@35493|Streptophyta,4JM31@91835|fabids	35493|Streptophyta	F	Belongs to the adenylate kinase family	-	-	2.7.4.3	ko:K00939	ko00230,ko00730,ko01100,ko01110,ko01130,map00230,map00730,map01100,map01110,map01130	M00049	R00127,R01547,R11319	RC00002	ko00000,ko00001,ko00002,ko01000,ko04147	-	-	ADK
Ssa01000576.t1	3880.AES75041	4.48e-13	69.3	COG5126@1|root,KOG0027@2759|Eukaryota,37V9H@33090|Viridiplantae,3GIZZ@35493|Streptophyta,4JQ7D@91835|fabids	35493|Streptophyta	T	calcium-binding protein	-	GO:0003674,GO:0005488,GO:0005509,GO:0005575,GO:0005623,GO:0005886,GO:0006950,GO:0008150,GO:0009611,GO:0016020,GO:0043167,GO:0043169,GO:0044464,GO:0046872,GO:0050896,GO:0071944	-	ko:K13448	ko04626,map04626	-	-	-	ko00000,ko00001	-	-	EF-hand_1,EF-hand_5,EF-hand_6,EF-hand_7,EF-hand_8
Ssa01000577.t1	3847.GLYMA19G25260.1	0	940	COG0515@1|root,KOG1187@2759|Eukaryota,37SAE@33090|Viridiplantae,3GDPX@35493|Streptophyta,4JKMW@91835|fabids	35493|Streptophyta	T	LysM domain	-	GO:0003674,GO:0003824,GO:0004672,GO:0004674,GO:0004675,GO:0004888,GO:0005575,GO:0005623,GO:0005886,GO:0006464,GO:0006468,GO:0006793,GO:0006796,GO:0006807,GO:0007154,GO:0007165,GO:0007166,GO:0007167,GO:0007178,GO:0008150,GO:0008152,GO:0009987,GO:0016020,GO:0016301,GO:0016310,GO:0016740,GO:0016772,GO:0016773,GO:0019199,GO:0019538,GO:0023052,GO:0036211,GO:0038023,GO:0043170,GO:0043412,GO:0044237,GO:…	-	-	-	-	-	-	-	-	-	LysM,Pkinase,Pkinase_Tyr
Ssa01000578.t2	3847.GLYMA16G06360.1	3.91e-117	338	COG0036@1|root,KOG3111@2759|Eukaryota,37HKX@33090|Viridiplantae,3GBRT@35493|Streptophyta,4JF5T@91835|fabids	35493|Streptophyta	G	Ribulose-phosphate 3-epimerase	-	GO:0003674,GO:0003824,GO:0004750,GO:0005488,GO:0005575,GO:0005622,GO:0005623,GO:0005737,GO:0005829,GO:0005975,GO:0005996,GO:0006081,GO:0006098,GO:0006139,GO:0006725,GO:0006732,GO:0006733,GO:0006739,GO:0006753,GO:0006793,GO:0006796,GO:0006807,GO:0008150,GO:0008152,GO:0009052,GO:0009056,GO:0009117,GO:0009987,GO:0016052,GO:0016853,GO:0016854,GO:0016857,GO:0019321,GO:0019323,GO:0019362,GO:0019637,GO:…	5.1.3.1	ko:K01783	ko00030,ko00040,ko00710,ko01100,ko01110,ko01120,ko01130,ko01200,ko01230,map00030,map00040,map00710,map01100,map01110,map01120,map01130,map01200,map01230	M00004,M00007	R01529	RC00540	ko00000,ko00001,ko00002,ko01000	-	-	Ribul_P_3_epim
Ssa01000578.t1	3847.GLYMA19G25270.1	5.71e-143	405	COG0036@1|root,KOG3111@2759|Eukaryota,37HKX@33090|Viridiplantae,3GBRT@35493|Streptophyta,4JF5T@91835|fabids	35493|Streptophyta	G	Ribulose-phosphate 3-epimerase	-	GO:0003674,GO:0003824,GO:0004750,GO:0005488,GO:0005575,GO:0005622,GO:0005623,GO:0005737,GO:0005829,GO:0005975,GO:0005996,GO:0006081,GO:0006098,GO:0006139,GO:0006725,GO:0006732,GO:0006733,GO:0006739,GO:0006753,GO:0006793,GO:0006796,GO:0006807,GO:0008150,GO:0008152,GO:0009052,GO:0009056,GO:0009117,GO:0009987,GO:0016052,GO:0016853,GO:0016854,GO:0016857,GO:0019321,GO:0019323,GO:0019362,GO:0019637,GO:…	5.1.3.1	ko:K01783	ko00030,ko00040,ko00710,ko01100,ko01110,ko01120,ko01130,ko01200,ko01230,map00030,map00040,map00710,map01100,map01110,map01120,map01130,map01200,map01230	M00004,M00007	R01529	RC00540	ko00000,ko00001,ko00002,ko01000	-	-	Ribul_P_3_epim
Ssa01000579.t1	3988.XP_002509538.1	5.46e-71	224	2AFWC@1|root,2RYYI@2759|Eukaryota,37U9Q@33090|Viridiplantae,3GIG8@35493|Streptophyta,4JPKS@91835|fabids	35493|Streptophyta	S	At3g27210-like	-	-	-	-	-	-	-	-	-	-	-	-
Ssa01000580.t1	3885.XP_007161745.1	1.91e-229	639	COG0596@1|root,KOG2624@2759|Eukaryota,37J13@33090|Viridiplantae,3GBVW@35493|Streptophyta,4JKGH@91835|fabids	35493|Streptophyta	I	Belongs to the AB hydrolase superfamily. Lipase family	-	GO:0002213,GO:0003674,GO:0003824,GO:0006950,GO:0006952,GO:0008150,GO:0016298,GO:0016787,GO:0016788,GO:0050896	3.1.1.13	ko:K01052	ko00100,ko04142,ko04979,map00100,map04142,map04979	-	R01462	RC00055,RC00523	ko00000,ko00001,ko01000	-	-	Abhydro_lipase,Abhydrolase_1,Hydrolase_4
Ssa01000581.t2	3847.GLYMA05G14800.1	7.13e-20	85.1	2BD6H@1|root,2RZRN@2759|Eukaryota,37UKW@33090|Viridiplantae,3GIP1@35493|Streptophyta,4JQB7@91835|fabids	35493|Streptophyta	S	Plastocyanin-like domain	-	-	-	-	-	-	-	-	-	-	-	Cu_bind_like
Ssa01000581.t1	3847.GLYMA19G25570.1	5.08e-64	201	2BD6H@1|root,2RZRN@2759|Eukaryota,37UKW@33090|Viridiplantae,3GIP1@35493|Streptophyta,4JQB7@91835|fabids	35493|Streptophyta	S	Plastocyanin-like domain	-	-	-	-	-	-	-	-	-	-	-	Cu_bind_like
Ssa01000582.t1	3694.POPTR_0001s33950.1	8.05e-302	828	COG0572@1|root,KOG4203@2759|Eukaryota,37MJC@33090|Viridiplantae,3GE4G@35493|Streptophyta,4JS3E@91835|fabids	35493|Streptophyta	F	Belongs to the uridine kinase family	-	GO:0003674,GO:0003824,GO:0004845,GO:0004849,GO:0005575,GO:0005622,GO:0005623,GO:0005737,GO:0005829,GO:0006109,GO:0006139,GO:0006206,GO:0006207,GO:0006213,GO:0006220,GO:0006221,GO:0006222,GO:0006725,GO:0006753,GO:0006793,GO:0006796,GO:0006807,GO:0008150,GO:0008152,GO:0008655,GO:0009058,GO:0009112,GO:0009116,GO:0009117,GO:0009119,GO:0009123,GO:0009124,GO:0009129,GO:0009130,GO:0009156,GO:0009161,GO:…	2.4.2.9,2.7.1.48,5.1.3.1	ko:K00761,ko:K00876,ko:K01783	ko00030,ko00040,ko00240,ko00710,ko00983,ko01100,ko01110,ko01120,ko01130,ko01200,ko01230,map00030,map00040,map00240,map00710,map00983,map01100,map01110,map01120,map01130,map01200,map01230	M00004,M00007	R00513,R00516,R00517,R00962,R00964,R00966,R00967,R00968,R00970,R01529,R01548,R01549,R01880,R02091,R02096,R02097,R02327,R02332,R02371,R02372,R08232	RC00002,RC00017,RC00063,RC00540	ko00000,ko00001,ko00002,ko01000	-	-	PRK,UPRTase
Ssa01000583.t1	3827.XP_004513194.1	5.36e-295	813	COG2265@1|root,2QTKF@2759|Eukaryota,37HVX@33090|Viridiplantae,3GB1F@35493|Streptophyta,4JKU9@91835|fabids	35493|Streptophyta	J	Belongs to the class I-like SAM-binding methyltransferase superfamily. RNA M5U methyltransferase family	-	-	-	-	-	-	-	-	-	-	-	Cons_hypoth95,MTS
Ssa01000584.t1	3847.GLYMA16G06180.1	6.45e-113	338	28KFZ@1|root,2S0VP@2759|Eukaryota,37V0W@33090|Viridiplantae,3GJ96@35493|Streptophyta,4JPCW@91835|fabids	35493|Streptophyta	S	Nucleotide-diphospho-sugar transferase	-	-	-	-	-	-	-	-	-	-	-	Nucleotid_trans
Ssa01000585.t1	3847.GLYMA16G06160.1	1.02e-179	512	KOG1072@1|root,KOG1072@2759|Eukaryota,37P97@33090|Viridiplantae,3GA1X@35493|Streptophyta,4JEBS@91835|fabids	35493|Streptophyta	S	F-box kelch-repeat protein	-	GO:0000151,GO:0003674,GO:0005488,GO:0005515,GO:0005575,GO:0005622,GO:0005623,GO:0005634,GO:0005737,GO:0006508,GO:0006511,GO:0006807,GO:0008150,GO:0008152,GO:0009056,GO:0009057,GO:0009987,GO:0010498,GO:0019005,GO:0019222,GO:0019538,GO:0019899,GO:0019941,GO:0030162,GO:0030163,GO:0031461,GO:0031625,GO:0032991,GO:0043161,GO:0043170,GO:0043226,GO:0043227,GO:0043229,GO:0043231,GO:0043632,GO:0044237,GO:…	-	-	-	-	-	-	-	-	-	Kelch_1,Kelch_6
Ssa01000586.t1	3847.GLYMA19G18350.2	0	941	COG0464@1|root,KOG0740@2759|Eukaryota,37J89@33090|Viridiplantae,3G8AI@35493|Streptophyta,4JGP0@91835|fabids	35493|Streptophyta	O	Belongs to the AAA ATPase family	-	GO:0000003,GO:0000018,GO:0000228,GO:0000280,GO:0000287,GO:0001503,GO:0001649,GO:0003674,GO:0003824,GO:0005488,GO:0005575,GO:0005622,GO:0005623,GO:0005634,GO:0005694,GO:0005737,GO:0006139,GO:0006163,GO:0006282,GO:0006725,GO:0006753,GO:0006793,GO:0006796,GO:0006807,GO:0006996,GO:0007049,GO:0007140,GO:0007276,GO:0008150,GO:0008152,GO:0008283,GO:0009117,GO:0009123,GO:0009126,GO:0009141,GO:0009144,GO:…	-	-	-	-	-	-	-	-	-	AAA,Vps4_C
Ssa01000587.t1	3847.GLYMA19G25810.1	1.08e-235	662	COG2124@1|root,KOG0157@2759|Eukaryota,37MQW@33090|Viridiplantae,3GACU@35493|Streptophyta,4JK2E@91835|fabids	35493|Streptophyta	IQ	Cytochrome p450	-	-	1.14.14.48	ko:K20665	-	-	-	-	ko00000,ko00199,ko01000	-	-	p450
Ssa01000587.t2	3847.GLYMA19G25810.1	1.25e-239	672	COG2124@1|root,KOG0157@2759|Eukaryota,37MQW@33090|Viridiplantae,3GACU@35493|Streptophyta,4JK2E@91835|fabids	35493|Streptophyta	IQ	Cytochrome p450	-	-	1.14.14.48	ko:K20665	-	-	-	-	ko00000,ko00199,ko01000	-	-	p450
Ssa01000588.t1	3827.XP_004489611.1	2.32e-262	721	COG2041@1|root,KOG0535@2759|Eukaryota,37JRC@33090|Viridiplantae,3G7TT@35493|Streptophyta,4JD47@91835|fabids	35493|Streptophyta	C	Sulfite oxidase-like	-	GO:0003674,GO:0003824,GO:0005575,GO:0005622,GO:0005623,GO:0005737,GO:0005739,GO:0005777,GO:0006725,GO:0006778,GO:0006790,GO:0006807,GO:0008150,GO:0008152,GO:0008482,GO:0009987,GO:0010035,GO:0010477,GO:0015994,GO:0016491,GO:0016667,GO:0016670,GO:0033013,GO:0042221,GO:0042579,GO:0043226,GO:0043227,GO:0043229,GO:0043231,GO:0044237,GO:0044424,GO:0044444,GO:0044464,GO:0046483,GO:0050896,GO:0051186,GO:…	1.8.3.1	ko:K00387	ko00920,ko01100,ko01120,map00920,map01100,map01120	-	R00533	RC00168	ko00000,ko00001,ko01000	-	-	Mo-co_dimer,Oxidored_molyb
Ssa01000589.t1	3827.XP_004513622.1	1.02e-54	173	KOG4479@1|root,KOG4479@2759|Eukaryota,37VC9@33090|Viridiplantae,3GJMX@35493|Streptophyta,4JQ4Y@91835|fabids	35493|Streptophyta	K	Involved in mRNA export coupled transcription activation by association with both the TREX-2 and the SAGA complexes. The transcription regulatory histone acetylation (HAT) complex SAGA is a multiprotein complex that activates transcription by remodeling chromatin and mediating histone acetylation and deubiquitination. Within the SAGA complex, participates to a subcomplex that specifically deubiqu…	-	-	-	ko:K11368	-	-	-	-	ko00000,ko03019,ko03021,ko03036	-	-	EnY2
Ssa01000590.t1	3847.GLYMA16G06100.1	1.81e-180	506	2CNFT@1|root,2QVZQ@2759|Eukaryota,37Q6V@33090|Viridiplantae,3GAH6@35493|Streptophyta,4JH8W@91835|fabids	35493|Streptophyta	S	B2 protein-like	-	-	-	-	-	-	-	-	-	-	-	Dev_Cell_Death
Ssa01000590.t2	3847.GLYMA16G06100.1	2.31e-180	506	2CNFT@1|root,2QVZQ@2759|Eukaryota,37Q6V@33090|Viridiplantae,3GAH6@35493|Streptophyta,4JH8W@91835|fabids	35493|Streptophyta	S	B2 protein-like	-	-	-	-	-	-	-	-	-	-	-	Dev_Cell_Death
Ssa01000591.t1	981085.XP_010112366.1	3.06e-64	202	2CBKH@1|root,2QT42@2759|Eukaryota,37N6T@33090|Viridiplantae,3G798@35493|Streptophyta,4JFV5@91835|fabids	35493|Streptophyta	U	Mitochondrial import receptor subunit	-	GO:0003674,GO:0005215,GO:0005575,GO:0005622,GO:0005623,GO:0005737,GO:0005739,GO:0005740,GO:0005741,GO:0005742,GO:0005743,GO:0005744,GO:0006605,GO:0006626,GO:0006810,GO:0006839,GO:0006886,GO:0006996,GO:0007005,GO:0008104,GO:0008150,GO:0008320,GO:0008565,GO:0009987,GO:0015031,GO:0015399,GO:0015405,GO:0015450,GO:0015833,GO:0016020,GO:0016043,GO:0019866,GO:0019867,GO:0022804,GO:0022857,GO:0022884,GO:…	-	-	-	-	-	-	-	-	-	TOM20_plant
Ssa01000592.t1	3885.XP_007161726.1	0	1381	KOG1829@1|root,KOG1829@2759|Eukaryota,37IZ2@33090|Viridiplantae,3GEQS@35493|Streptophyta,4JND0@91835|fabids	35493|Streptophyta	T	isoform X1	-	-	-	-	-	-	-	-	-	-	-	-
Ssa01000593.t1	3983.cassava4.1_011646m	7.12e-229	631	COG1678@1|root,KOG1567@2759|Eukaryota,37KRP@33090|Viridiplantae,3GC18@35493|Streptophyta,4JEH8@91835|fabids	35493|Streptophyta	F	Ribonucleoside-diphosphate reductase small	-	GO:0006139,GO:0006259,GO:0006260,GO:0006281,GO:0006725,GO:0006807,GO:0006950,GO:0006974,GO:0007275,GO:0008150,GO:0008152,GO:0008219,GO:0009058,GO:0009059,GO:0009987,GO:0012501,GO:0032501,GO:0032502,GO:0033554,GO:0034641,GO:0034645,GO:0043170,GO:0044237,GO:0044238,GO:0044249,GO:0044260,GO:0046483,GO:0048856,GO:0050789,GO:0050794,GO:0050896,GO:0051716,GO:0051726,GO:0065007,GO:0071704,GO:0090304,GO:…	1.17.4.1	ko:K10808	ko00230,ko00240,ko00480,ko00983,ko01100,ko04115,map00230,map00240,map00480,map00983,map01100,map04115	M00053	R02017,R02019,R02024,R08363,R08364,R11893	RC00613,RC01003	ko00000,ko00001,ko00002,ko01000,ko03400	-	-	Ribonuc_red_sm
Ssa01000594.t1	3847.GLYMA16G06040.1	3.64e-124	360	KOG4173@1|root,KOG4173@2759|Eukaryota,37R4S@33090|Viridiplantae,3GDES@35493|Streptophyta,4JKHX@91835|fabids	35493|Streptophyta	U	ZINC FINGER protein	-	-	-	-	-	-	-	-	-	-	-	zf-C2H2
Ssa01000595.t1	3827.XP_004513316.1	0	889	28IZG@1|root,2QSPA@2759|Eukaryota,37III@33090|Viridiplantae,3GAZ7@35493|Streptophyta,4JEAS@91835|fabids	35493|Streptophyta	S	Nodulin-like	-	-	-	-	-	-	-	-	-	-	-	Nodulin-like
Ssa01000596.t1	3649.evm.model.supercontig_171.4	9.75e-33	114	2CK4W@1|root,2S9SI@2759|Eukaryota,37WUD@33090|Viridiplantae,3GKE8@35493|Streptophyta,3I14M@3699|Brassicales	35493|Streptophyta	S	Protein of unknown function (DUF3339)	-	-	-	-	-	-	-	-	-	-	-	DUF3339
Ssa01000597.t1	3827.XP_004515981.1	9.1e-33	114	2CK4W@1|root,2S73T@2759|Eukaryota,37WTU@33090|Viridiplantae,3GK10@35493|Streptophyta,4JUV5@91835|fabids	35493|Streptophyta	S	Protein of unknown function (DUF3339)	-	-	-	-	-	-	-	-	-	-	-	DUF3339
Ssa01000598.t1	3983.cassava4.1_030384m	9.53e-26	100	2CXCX@1|root,2S4KG@2759|Eukaryota,37W72@33090|Viridiplantae,3GKPR@35493|Streptophyta,4JUX6@91835|fabids	35493|Streptophyta	-	-	-	-	-	-	-	-	-	-	-	-	-	-
Ssa01000599.t1	3847.GLYMA19G26380.1	5.77e-32	112	2DHYD@1|root,2S5XK@2759|Eukaryota,37W0G@33090|Viridiplantae,3GKBK@35493|Streptophyta,4JR47@91835|fabids	35493|Streptophyta	-	-	-	-	-	-	-	-	-	-	-	-	-	-
Ssa01000600.t1	3847.GLYMA16G05895.2	8.02e-150	434	2B6B3@1|root,2S0KW@2759|Eukaryota,37UW5@33090|Viridiplantae,3GIYW@35493|Streptophyta,4JPTJ@91835|fabids	35493|Streptophyta	K	Squamosa promoter-binding-like protein	-	-	-	-	-	-	-	-	-	-	-	SBP
Ssa01000601.t1	3885.XP_007161664.1	1.59e-73	228	28JIG@1|root,2RZAJ@2759|Eukaryota,37UFY@33090|Viridiplantae,3GI6R@35493|Streptophyta,4JPST@91835|fabids	35493|Streptophyta	K	WRKY transcription factor	-	GO:0000122,GO:0000976,GO:0000977,GO:0000978,GO:0000987,GO:0001012,GO:0001067,GO:0003674,GO:0003676,GO:0003677,GO:0003690,GO:0003700,GO:0005488,GO:0005575,GO:0005622,GO:0005623,GO:0005634,GO:0006355,GO:0006357,GO:0006950,GO:0007275,GO:0008150,GO:0009653,GO:0009791,GO:0009888,GO:0009889,GO:0009890,GO:0009892,GO:0009987,GO:0010015,GO:0010053,GO:0010055,GO:0010468,GO:0010556,GO:0010558,GO:0010605,GO:…	-	-	-	-	-	-	-	-	-	WRKY
Ssa01000601.t2	3885.XP_007161664.1	8.66e-78	239	28JIG@1|root,2RZAJ@2759|Eukaryota,37UFY@33090|Viridiplantae,3GI6R@35493|Streptophyta,4JPST@91835|fabids	35493|Streptophyta	K	WRKY transcription factor	-	GO:0000122,GO:0000976,GO:0000977,GO:0000978,GO:0000987,GO:0001012,GO:0001067,GO:0003674,GO:0003676,GO:0003677,GO:0003690,GO:0003700,GO:0005488,GO:0005575,GO:0005622,GO:0005623,GO:0005634,GO:0006355,GO:0006357,GO:0006950,GO:0007275,GO:0008150,GO:0009653,GO:0009791,GO:0009888,GO:0009889,GO:0009890,GO:0009892,GO:0009987,GO:0010015,GO:0010053,GO:0010055,GO:0010468,GO:0010556,GO:0010558,GO:0010605,GO:…	-	-	-	-	-	-	-	-	-	WRKY
Ssa01000602.t1	3885.XP_007155085.1	4.51e-130	376	COG1028@1|root,KOG0725@2759|Eukaryota,37N3P@33090|Viridiplantae,3GCTT@35493|Streptophyta,4JGHB@91835|fabids	35493|Streptophyta	Q	Enoyl-(Acyl carrier protein) reductase	-	-	-	-	-	-	-	-	-	-	-	adh_short_C2
Ssa01000603.t1	102107.XP_008231093.1	2.46e-146	417	COG1132@1|root,KOG0055@2759|Eukaryota,37N0D@33090|Viridiplantae,3G8WE@35493|Streptophyta,4JI8D@91835|fabids	35493|Streptophyta	Q	ABC transporter I family member	-	GO:0003674,GO:0005215,GO:0005575,GO:0005622,GO:0005623,GO:0005737,GO:0009507,GO:0009526,GO:0009536,GO:0009941,GO:0016020,GO:0031967,GO:0031975,GO:0043226,GO:0043227,GO:0043229,GO:0043231,GO:0044422,GO:0044424,GO:0044434,GO:0044435,GO:0044444,GO:0044446,GO:0044464	-	-	-	-	-	-	-	-	-	ABC_tran
Ssa01000604.t1	102107.XP_008231164.1	9.64e-37	134	COG2857@1|root,KOG3052@2759|Eukaryota,37KZG@33090|Viridiplantae,3G9E4@35493|Streptophyta,4JEEE@91835|fabids	35493|Streptophyta	C	heme protein	-	GO:0005575,GO:0005622,GO:0005623,GO:0005737,GO:0005739,GO:0005740,GO:0005743,GO:0016020,GO:0019866,GO:0031090,GO:0031966,GO:0031967,GO:0031975,GO:0043226,GO:0043227,GO:0043229,GO:0043231,GO:0044422,GO:0044424,GO:0044429,GO:0044444,GO:0044446,GO:0044464	-	ko:K00413	ko00190,ko01100,ko02020,ko04260,ko04714,ko04932,ko05010,ko05012,ko05016,map00190,map01100,map02020,map04260,map04714,map04932,map05010,map05012,map05016	M00151,M00152	-	-	ko00000,ko00001,ko00002	-	-	Cytochrom_C1
Ssa01000604.t2	102107.XP_008231164.1	3.92e-37	134	COG2857@1|root,KOG3052@2759|Eukaryota,37KZG@33090|Viridiplantae,3G9E4@35493|Streptophyta,4JEEE@91835|fabids	35493|Streptophyta	C	heme protein	-	GO:0005575,GO:0005622,GO:0005623,GO:0005737,GO:0005739,GO:0005740,GO:0005743,GO:0016020,GO:0019866,GO:0031090,GO:0031966,GO:0031967,GO:0031975,GO:0043226,GO:0043227,GO:0043229,GO:0043231,GO:0044422,GO:0044424,GO:0044429,GO:0044444,GO:0044446,GO:0044464	-	ko:K00413	ko00190,ko01100,ko02020,ko04260,ko04714,ko04932,ko05010,ko05012,ko05016,map00190,map01100,map02020,map04260,map04714,map04932,map05010,map05012,map05016	M00151,M00152	-	-	ko00000,ko00001,ko00002	-	-	Cytochrom_C1
Ssa01000605.t1	3847.GLYMA16G05850.1	0	1172	COG1297@1|root,2QQ2H@2759|Eukaryota,37K1R@33090|Viridiplantae,3G8NV@35493|Streptophyta,4JDJQ@91835|fabids	35493|Streptophyta	S	Transporter	-	GO:0003674,GO:0005215,GO:0005575,GO:0005622,GO:0005623,GO:0005737,GO:0005773,GO:0005774,GO:0006810,GO:0008150,GO:0016020,GO:0022857,GO:0031090,GO:0043226,GO:0043227,GO:0043229,GO:0043231,GO:0044422,GO:0044424,GO:0044437,GO:0044444,GO:0044446,GO:0044464,GO:0051179,GO:0051234,GO:0055085,GO:0098588,GO:0098805	-	-	-	-	-	-	-	-	-	OPT
Ssa01000606.t1	29760.VIT_14s0068g01690.t01	3.91e-166	469	28IBB@1|root,2QQMV@2759|Eukaryota,37IJA@33090|Viridiplantae,3GAY1@35493|Streptophyta	35493|Streptophyta	K	transcription factor	TCP20	GO:0000976,GO:0000987,GO:0001067,GO:0003674,GO:0003676,GO:0003677,GO:0003690,GO:0003700,GO:0005488,GO:0005575,GO:0005622,GO:0005623,GO:0005634,GO:0006355,GO:0008150,GO:0009653,GO:0009889,GO:0010468,GO:0010556,GO:0019219,GO:0019222,GO:0031323,GO:0031326,GO:0032502,GO:0043226,GO:0043227,GO:0043229,GO:0043231,GO:0043565,GO:0044212,GO:0044424,GO:0044464,GO:0048856,GO:0050789,GO:0050794,GO:0051171,GO:…	-	-	-	-	-	-	-	-	-	TCP
Ssa01000608.t1	3847.GLYMA16G05830.1	3.75e-275	758	2CN02@1|root,2QT1H@2759|Eukaryota,37J8R@33090|Viridiplantae,3G8VN@35493|Streptophyta,4JIZX@91835|fabids	35493|Streptophyta	S	ACT domain	-	GO:0003674,GO:0005488,GO:0006355,GO:0006464,GO:0006807,GO:0006808,GO:0007154,GO:0007584,GO:0008150,GO:0008152,GO:0009605,GO:0009719,GO:0009889,GO:0009891,GO:0009893,GO:0009987,GO:0009991,GO:0010033,GO:0010243,GO:0010468,GO:0010556,GO:0010557,GO:0010604,GO:0010628,GO:0016597,GO:0018175,GO:0018177,GO:0019219,GO:0019222,GO:0019538,GO:0031323,GO:0031325,GO:0031326,GO:0031328,GO:0031406,GO:0031667,GO:…	-	-	-	-	-	-	-	-	-	ACT,ACT_6
Ssa01000609.t1	102107.XP_008231087.1	5.27e-215	622	KOG4197@1|root,KOG4197@2759|Eukaryota,37HVA@33090|Viridiplantae,3G74R@35493|Streptophyta,4JIAY@91835|fabids	35493|Streptophyta	S	Pentatricopeptide repeat-containing protein	-	GO:0003674,GO:0003676,GO:0003723,GO:0003824,GO:0004518,GO:0004519,GO:0005488,GO:0005575,GO:0005622,GO:0005623,GO:0005737,GO:0006139,GO:0006725,GO:0006807,GO:0008150,GO:0008152,GO:0009451,GO:0009507,GO:0009536,GO:0009987,GO:0016070,GO:0016787,GO:0016788,GO:0034641,GO:0043170,GO:0043226,GO:0043227,GO:0043229,GO:0043231,GO:0043412,GO:0044237,GO:0044238,GO:0044424,GO:0044444,GO:0044464,GO:0046483,GO:…	-	-	-	-	-	-	-	-	-	MNE1,PPR,PPR_2,PPR_3
Ssa01000610.t2	3847.GLYMA19G26600.2	0	1817	KOG1862@1|root,KOG1862@2759|Eukaryota,37IX9@33090|Viridiplantae,3G73F@35493|Streptophyta,4JJUP@91835|fabids	35493|Streptophyta	S	GYF domain	-	-	-	ko:K18730	-	-	-	-	ko00000,ko03019	-	-	GYF
Ssa01000610.t1	3847.GLYMA19G26600.2	0	1919	KOG1862@1|root,KOG1862@2759|Eukaryota,37IX9@33090|Viridiplantae,3G73F@35493|Streptophyta,4JJUP@91835|fabids	35493|Streptophyta	S	GYF domain	-	-	-	ko:K18730	-	-	-	-	ko00000,ko03019	-	-	GYF
Ssa01000611.t1	3847.GLYMA19G26631.1	1.16e-287	785	COG5277@1|root,KOG0677@2759|Eukaryota,37KEU@33090|Viridiplantae,3G7A5@35493|Streptophyta,4JE33@91835|fabids	35493|Streptophyta	Z	Belongs to the actin family	ARP2	GO:0000902,GO:0000904,GO:0005575,GO:0005622,GO:0005623,GO:0005856,GO:0005885,GO:0006996,GO:0007010,GO:0007015,GO:0008150,GO:0009653,GO:0009825,GO:0009888,GO:0009987,GO:0010026,GO:0010090,GO:0015629,GO:0016043,GO:0016049,GO:0030029,GO:0030036,GO:0030154,GO:0032502,GO:0032989,GO:0032991,GO:0040007,GO:0043226,GO:0043228,GO:0043229,GO:0043232,GO:0044422,GO:0044424,GO:0044430,GO:0044446,GO:0044464,GO:…	-	ko:K17260	ko04138,ko04530,map04138,map04530	-	-	-	ko00000,ko00001,ko04131,ko04147,ko04812	-	-	Actin
Ssa01000612.t1	3885.XP_007161685.1	2.21e-277	762	28JQ4@1|root,2QS3E@2759|Eukaryota,37I7V@33090|Viridiplantae,3GAAV@35493|Streptophyta,4JN4T@91835|fabids	35493|Streptophyta	S	Omega-hydroxypalmitate O-feruloyl	-	GO:0000271,GO:0003674,GO:0003824,GO:0005975,GO:0005976,GO:0006725,GO:0008150,GO:0008152,GO:0009058,GO:0009059,GO:0009664,GO:0009698,GO:0009699,GO:0009832,GO:0009987,GO:0010345,GO:0010383,GO:0010393,GO:0016043,GO:0016051,GO:0016740,GO:0016746,GO:0016747,GO:0017144,GO:0019438,GO:0019748,GO:0033692,GO:0034637,GO:0034645,GO:0042546,GO:0043170,GO:0044036,GO:0044038,GO:0044085,GO:0044237,GO:0044238,GO:…	2.3.1.188	ko:K15400	ko00073,map00073	-	R09106	RC00004,RC00041	ko00000,ko00001,ko01000	-	-	Transferase
Ssa01000613.t1	3885.XP_007161686.1	9.75e-88	262	28I65@1|root,2QQGB@2759|Eukaryota,37V5M@33090|Viridiplantae,3GIW4@35493|Streptophyta,4JPDJ@91835|fabids	35493|Streptophyta	S	Pollen proteins Ole e I like	-	-	-	-	-	-	-	-	-	-	-	Pollen_Ole_e_I
Ssa01000613.t2	3885.XP_007161686.1	6.59e-89	264	28I65@1|root,2QQGB@2759|Eukaryota,37V5M@33090|Viridiplantae,3GIW4@35493|Streptophyta,4JPDJ@91835|fabids	35493|Streptophyta	S	Pollen proteins Ole e I like	-	-	-	-	-	-	-	-	-	-	-	Pollen_Ole_e_I
Ssa01000615.t1	3885.XP_007161687.1	0	955	28K9J@1|root,2QUV6@2759|Eukaryota,37PIK@33090|Viridiplantae,3GDTB@35493|Streptophyta,4JKKG@91835|fabids	35493|Streptophyta	K	Belongs to the GRAS family	-	-	-	-	-	-	-	-	-	-	-	GRAS
Ssa01000616.t1	225117.XP_009346792.1	1.1e-69	211	2ANCE@1|root,2RZE2@2759|Eukaryota,37UHU@33090|Viridiplantae,3GJ1K@35493|Streptophyta,4JTYT@91835|fabids	35493|Streptophyta	S	May serve as docking site to facilitate the association of other proteins to the plasma membrane	-	-	-	-	-	-	-	-	-	-	-	Rad60-SLD_2
Ssa01000617.t1	3885.XP_007161691.1	6.13e-77	230	COG0695@1|root,KOG1752@2759|Eukaryota,37UFC@33090|Viridiplantae,3GJKM@35493|Streptophyta,4JPEW@91835|fabids	35493|Streptophyta	O	Glutaredoxin	-	GO:0000003,GO:0003006,GO:0005575,GO:0005622,GO:0005623,GO:0005634,GO:0005737,GO:0006355,GO:0007275,GO:0008150,GO:0009653,GO:0009791,GO:0009889,GO:0009890,GO:0009892,GO:0009908,GO:0010468,GO:0010556,GO:0010558,GO:0010605,GO:0010629,GO:0019219,GO:0019222,GO:0022414,GO:0031323,GO:0031324,GO:0031326,GO:0031327,GO:0032501,GO:0032502,GO:0043226,GO:0043227,GO:0043229,GO:0043231,GO:0044424,GO:0044464,GO:…	-	ko:K03676	-	-	-	-	ko00000,ko03110	-	-	Glutaredoxin
Ssa01000618.t1	3847.GLYMA19G26780.2	3.39e-255	714	KOG2669@1|root,KOG2669@2759|Eukaryota,37I9U@33090|Viridiplantae,3GBAY@35493|Streptophyta,4JCZP@91835|fabids	35493|Streptophyta	A	Regulation of nuclear pre-mRNA domain-containing protein	-	-	-	ko:K15559	-	-	-	-	ko00000,ko03021	-	-	CTD_bind
Ssa01000619.t1	3827.XP_004516388.1	7.04e-233	670	KOG2344@1|root,KOG2344@2759|Eukaryota,37Q55@33090|Viridiplantae,3G9EC@35493|Streptophyta,4JJHG@91835|fabids	35493|Streptophyta	U	exocyst complex component	-	-	-	ko:K07195	ko04910,map04910	-	-	-	ko00000,ko00001,ko03036,ko04131	-	-	Exo70
Ssa01000620.t1	3847.GLYMA16G05700.1	2.49e-313	862	28MN6@1|root,2QU5Y@2759|Eukaryota,37JVU@33090|Viridiplantae,3G8RN@35493|Streptophyta,4JMNQ@91835|fabids	35493|Streptophyta	-	-	-	-	-	-	-	-	-	-	-	-	-	-
Ssa01000620.t2	3847.GLYMA16G05700.1	3.75e-204	577	28MN6@1|root,2QU5Y@2759|Eukaryota,37JVU@33090|Viridiplantae,3G8RN@35493|Streptophyta,4JMNQ@91835|fabids	35493|Streptophyta	-	-	-	-	-	-	-	-	-	-	-	-	-	-
Ssa01000621.t1	3885.XP_007151749.1	3.42e-280	770	COG5273@1|root,KOG1311@2759|Eukaryota,37J6G@33090|Viridiplantae,3G7M3@35493|Streptophyta,4JHCT@91835|fabids	35493|Streptophyta	S	Belongs to the DHHC palmitoyltransferase family	-	GO:0005575,GO:0005623,GO:0005886,GO:0016020,GO:0044464,GO:0071944	2.3.1.225	ko:K16675,ko:K18932	ko04391,map04391	-	-	-	ko00000,ko00001,ko01000	-	-	DHHC
Ssa01000622.t1	225117.XP_009344209.1	2.45e-206	578	COG0584@1|root,KOG2421@2759|Eukaryota,37PE3@33090|Viridiplantae,3G7H4@35493|Streptophyta,4JJ4I@91835|fabids	35493|Streptophyta	C	Glycerophosphodiester phosphodiesterase	-	GO:0000287,GO:0003674,GO:0003824,GO:0005488,GO:0005575,GO:0005622,GO:0005623,GO:0005737,GO:0006629,GO:0006644,GO:0006650,GO:0006793,GO:0006796,GO:0006873,GO:0008081,GO:0008150,GO:0008152,GO:0008889,GO:0009056,GO:0009395,GO:0009536,GO:0009987,GO:0016042,GO:0016787,GO:0016788,GO:0019637,GO:0019725,GO:0030002,GO:0030320,GO:0030643,GO:0042578,GO:0042592,GO:0043167,GO:0043169,GO:0043226,GO:0043227,GO:…	3.1.4.46	ko:K18696	ko00564,map00564	-	R01030,R01470	RC00017,RC00425	ko00000,ko00001,ko01000	-	-	GDPD
Ssa01000623.t1	3847.GLYMA17G23740.1	3.22e-72	226	2CXVN@1|root,2S02N@2759|Eukaryota,37UY4@33090|Viridiplantae,3GI8U@35493|Streptophyta,4JU8R@91835|fabids	35493|Streptophyta	K	NAC transcription factor	-	-	-	-	-	-	-	-	-	-	-	NAM
Ssa01000625.t1	3827.XP_004492992.1	3.1e-236	672	2CMF8@1|root,2QQ6Z@2759|Eukaryota,37QEI@33090|Viridiplantae,3GD2A@35493|Streptophyta,4JEY0@91835|fabids	35493|Streptophyta	S	protein At2g33490-like isoform	-	-	-	-	-	-	-	-	-	-	-	BAR,BAR_3
Ssa01000626.t1	3847.GLYMA02G08050.1	1.19e-104	313	COG0703@1|root,2QSF9@2759|Eukaryota,37MV2@33090|Viridiplantae,3GA6T@35493|Streptophyta,4JMFM@91835|fabids	35493|Streptophyta	T	inactive shikimate kinase like 1	-	GO:0005575,GO:0005622,GO:0005623,GO:0005737,GO:0006996,GO:0008150,GO:0009507,GO:0009532,GO:0009536,GO:0009570,GO:0009657,GO:0009658,GO:0009668,GO:0009987,GO:0010027,GO:0016043,GO:0043226,GO:0043227,GO:0043229,GO:0043231,GO:0044422,GO:0044424,GO:0044434,GO:0044435,GO:0044444,GO:0044446,GO:0044464,GO:0061024,GO:0071840	2.7.1.71	ko:K00891	ko00400,ko01100,ko01110,ko01130,ko01230,map00400,map01100,map01110,map01130,map01230	M00022	R02412	RC00002,RC00078	ko00000,ko00001,ko00002,ko01000	-	-	SKI
Ssa01000626.t2	3847.GLYMA16G27060.1	3e-90	273	COG0703@1|root,2QSF9@2759|Eukaryota,37MV2@33090|Viridiplantae,3GA6T@35493|Streptophyta,4JMFM@91835|fabids	35493|Streptophyta	T	inactive shikimate kinase like 1	-	GO:0005575,GO:0005622,GO:0005623,GO:0005737,GO:0006996,GO:0008150,GO:0009507,GO:0009532,GO:0009536,GO:0009570,GO:0009657,GO:0009658,GO:0009668,GO:0009987,GO:0010027,GO:0016043,GO:0043226,GO:0043227,GO:0043229,GO:0043231,GO:0044422,GO:0044424,GO:0044434,GO:0044435,GO:0044444,GO:0044446,GO:0044464,GO:0061024,GO:0071840	2.7.1.71	ko:K00891	ko00400,ko01100,ko01110,ko01130,ko01230,map00400,map01100,map01110,map01130,map01230	M00022	R02412	RC00002,RC00078	ko00000,ko00001,ko00002,ko01000	-	-	SKI
Ssa01000627.t1	3847.GLYMA16G05600.1	0	929	KOG2306@1|root,KOG2306@2759|Eukaryota,37RAA@33090|Viridiplantae,3GE5C@35493|Streptophyta,4JJPB@91835|fabids	35493|Streptophyta	S	DUF4210	-	-	-	-	-	-	-	-	-	-	-	Chromosome_seg,DUF4210
Ssa01000628.t1	29730.Gorai.012G083200.1	1.65e-17	80.9	2CZ5X@1|root,2S8MR@2759|Eukaryota,37XDU@33090|Viridiplantae,3GM4Y@35493|Streptophyta	35493|Streptophyta	S	zinc finger protein	-	GO:0000003,GO:0003006,GO:0003674,GO:0003676,GO:0003677,GO:0003700,GO:0005488,GO:0005575,GO:0005622,GO:0005623,GO:0005634,GO:0006355,GO:0007275,GO:0008150,GO:0009791,GO:0009888,GO:0009889,GO:0009908,GO:0009909,GO:0010022,GO:0010073,GO:0010468,GO:0010556,GO:0010582,GO:0019219,GO:0019222,GO:0022414,GO:0031323,GO:0031326,GO:0032501,GO:0032502,GO:0043226,GO:0043227,GO:0043229,GO:0043231,GO:0044424,GO:…	-	-	-	-	-	-	-	-	-	-
Ssa01000629.t1	3880.AES80654	0	936	COG0204@1|root,2QQUD@2759|Eukaryota,37RY3@33090|Viridiplantae,3GDUB@35493|Streptophyta,4JEZJ@91835|fabids	35493|Streptophyta	I	acyltransferase-like protein	-	GO:0003674,GO:0003824,GO:0004144,GO:0005575,GO:0005622,GO:0005623,GO:0005737,GO:0006066,GO:0006629,GO:0006638,GO:0006639,GO:0006641,GO:0006720,GO:0006721,GO:0008150,GO:0008152,GO:0008374,GO:0008610,GO:0009058,GO:0009507,GO:0009532,GO:0009536,GO:0009570,GO:0009987,GO:0010287,GO:0016101,GO:0016411,GO:0016740,GO:0016746,GO:0016747,GO:0017144,GO:0019432,GO:0033306,GO:0034308,GO:0043226,GO:0043227,GO:…	-	-	-	-	-	-	-	-	-	Abhydrolase_1,Abhydrolase_6,DAGAT,Hydrolase_4
Ssa01000630.t1	3847.GLYMA16G05560.1	1.63e-52	172	2DPAC@1|root,2S695@2759|Eukaryota,37WAP@33090|Viridiplantae,3GJSW@35493|Streptophyta,4JQQ4@91835|fabids	35493|Streptophyta	S	Belongs to the Casparian strip membrane proteins (CASP) family	-	GO:0003674,GO:0005488,GO:0048037,GO:0051536,GO:0051540	-	-	-	-	-	-	-	-	-	DUF588
Ssa01000631.t1	3847.GLYMA16G05550.3	1.1e-232	648	2CKDA@1|root,2QSZH@2759|Eukaryota,37MER@33090|Viridiplantae,3GDQ5@35493|Streptophyta,4JF4J@91835|fabids	35493|Streptophyta	S	BRO1-like domain	-	-	-	-	-	-	-	-	-	-	-	BRO1
Ssa01000632.t1	3880.AES61208	2.82e-75	241	2D3PM@1|root,2S50T@2759|Eukaryota,3809E@33090|Viridiplantae,3GJNV@35493|Streptophyta,4JUGH@91835|fabids	35493|Streptophyta	S	Myb SANT-like DNA-binding domain protein	-	-	-	-	-	-	-	-	-	-	-	Myb_DNA-bind_3
Ssa01000634.t1	102107.XP_008231043.1	9.47e-42	147	2CZ13@1|root,2S7QE@2759|Eukaryota,37WUY@33090|Viridiplantae,3GK9Q@35493|Streptophyta,4JR2Q@91835|fabids	35493|Streptophyta	-	-	-	-	-	-	-	-	-	-	-	-	-	-
Ssa01000635.t1	3885.XP_007151745.1	0	915	COG0156@1|root,KOG1357@2759|Eukaryota,37P3R@33090|Viridiplantae,3G9PV@35493|Streptophyta,4JERC@91835|fabids	35493|Streptophyta	O	Long chain base biosynthesis protein	-	GO:0002178,GO:0005575,GO:0005622,GO:0005623,GO:0005737,GO:0005783,GO:0005789,GO:0006066,GO:0006629,GO:0006643,GO:0006644,GO:0006665,GO:0006667,GO:0006670,GO:0006672,GO:0006684,GO:0006686,GO:0006793,GO:0006796,GO:0006807,GO:0008150,GO:0008152,GO:0008610,GO:0008654,GO:0009058,GO:0009893,GO:0009894,GO:0009896,GO:0009987,GO:0010506,GO:0010508,GO:0012505,GO:0016020,GO:0016239,GO:0016241,GO:0017059,GO:…	2.3.1.50	ko:K00654	ko00600,ko01100,ko04071,ko04138,map00600,map01100,map04071,map04138	M00094,M00099	R01281	RC00004,RC02725,RC02849	ko00000,ko00001,ko00002,ko01000,ko01007	-	-	Aminotran_1_2
Ssa01000636.t1	3847.GLYMA16G26220.2	1.29e-243	672	COG5127@1|root,KOG2909@2759|Eukaryota,37N1B@33090|Viridiplantae,3G88Q@35493|Streptophyta,4JRVW@91835|fabids	35493|Streptophyta	C	Subunit of the peripheral V1 complex of vacuolar ATPase. Subunit C is necessary for the assembly of the catalytic sector of the enzyme and is likely to have a specific function in its catalytic activity. V-ATPase is responsible for acidifying a variety of intracellular compartments in eukaryotic cells	DET3	GO:0000221,GO:0000325,GO:0000902,GO:0003674,GO:0003824,GO:0005215,GO:0005575,GO:0005622,GO:0005623,GO:0005737,GO:0005773,GO:0005774,GO:0005794,GO:0005886,GO:0006810,GO:0006811,GO:0006812,GO:0008150,GO:0008324,GO:0008553,GO:0009507,GO:0009536,GO:0009653,GO:0009826,GO:0009987,GO:0012505,GO:0015075,GO:0015077,GO:0015078,GO:0015318,GO:0015399,GO:0015405,GO:0015662,GO:0015672,GO:0016020,GO:0016043,GO:…	-	ko:K02148	ko00190,ko01100,ko04145,ko04150,ko04721,ko04966,ko05110,ko05120,ko05323,map00190,map01100,map04145,map04150,map04721,map04966,map05110,map05120,map05323	M00160	-	-	ko00000,ko00001,ko00002	3.A.2.2	-	V-ATPase_C
Ssa01000637.t1	3656.XP_008465574.1	4.04e-231	640	KOG0767@1|root,KOG0767@2759|Eukaryota,37P9E@33090|Viridiplantae,3GEGJ@35493|Streptophyta,4JGH7@91835|fabids	35493|Streptophyta	C	Belongs to the mitochondrial carrier (TC 2.A.29) family	-	GO:0003674,GO:0005215,GO:0005575,GO:0005618,GO:0005622,GO:0005623,GO:0005737,GO:0005739,GO:0005740,GO:0005743,GO:0005773,GO:0005774,GO:0006810,GO:0006811,GO:0006817,GO:0006820,GO:0006839,GO:0006950,GO:0006970,GO:0008150,GO:0008509,GO:0009507,GO:0009536,GO:0009628,GO:0009651,GO:0015075,GO:0015103,GO:0015114,GO:0015318,GO:0015698,GO:0016020,GO:0016021,GO:0019866,GO:0022857,GO:0030312,GO:0031090,GO:…	-	ko:K15102	-	-	-	-	ko00000,ko02000,ko04147	2.A.29.4	-	Mito_carr
Ssa01000637.t2	3656.XP_008465574.1	2.58e-230	640	KOG0767@1|root,KOG0767@2759|Eukaryota,37P9E@33090|Viridiplantae,3GEGJ@35493|Streptophyta,4JGH7@91835|fabids	35493|Streptophyta	C	Belongs to the mitochondrial carrier (TC 2.A.29) family	-	GO:0003674,GO:0005215,GO:0005575,GO:0005618,GO:0005622,GO:0005623,GO:0005737,GO:0005739,GO:0005740,GO:0005743,GO:0005773,GO:0005774,GO:0006810,GO:0006811,GO:0006817,GO:0006820,GO:0006839,GO:0006950,GO:0006970,GO:0008150,GO:0008509,GO:0009507,GO:0009536,GO:0009628,GO:0009651,GO:0015075,GO:0015103,GO:0015114,GO:0015318,GO:0015698,GO:0016020,GO:0016021,GO:0019866,GO:0022857,GO:0030312,GO:0031090,GO:…	-	ko:K15102	-	-	-	-	ko00000,ko02000,ko04147	2.A.29.4	-	Mito_carr
Ssa01000638.t1	3880.AES80698	1.42e-77	245	2CYJ3@1|root,2S4PA@2759|Eukaryota,37VZ9@33090|Viridiplantae,3GJ1T@35493|Streptophyta,4JV0W@91835|fabids	35493|Streptophyta	S	KIP1-like protein	-	-	-	-	-	-	-	-	-	-	-	KIP1
Ssa01000639.t1	3827.XP_004493063.1	0	1029	KOG4197@1|root,KOG4197@2759|Eukaryota,37PAM@33090|Viridiplantae,3GGGF@35493|Streptophyta,4JN68@91835|fabids	35493|Streptophyta	L	Pentatricopeptide repeat-containing protein	-	GO:0003674,GO:0003676,GO:0003723,GO:0003824,GO:0004518,GO:0004519,GO:0005488,GO:0005575,GO:0005622,GO:0005623,GO:0005737,GO:0005739,GO:0006139,GO:0006725,GO:0006807,GO:0008150,GO:0008152,GO:0009451,GO:0009987,GO:0016070,GO:0016787,GO:0016788,GO:0034641,GO:0043170,GO:0043226,GO:0043227,GO:0043229,GO:0043231,GO:0043412,GO:0044237,GO:0044238,GO:0044424,GO:0044444,GO:0044464,GO:0046483,GO:0071704,GO:…	-	-	-	-	-	-	-	-	-	DYW_deaminase,PPR,PPR_2
Ssa01000640.t1	3885.XP_007161641.1	2.71e-14	72	2E3QU@1|root,2SARI@2759|Eukaryota,37XT4@33090|Viridiplantae,3GMAF@35493|Streptophyta,4JR60@91835|fabids	35493|Streptophyta	-	-	-	-	-	-	-	-	-	-	-	-	-	-
Ssa01000641.t1	3885.XP_007151726.1	1.71e-218	612	COG0406@1|root,KOG0234@2759|Eukaryota,37IPN@33090|Viridiplantae,3GCM4@35493|Streptophyta,4JIW3@91835|fabids	35493|Streptophyta	G	Phosphoglycerate mutase family	-	-	-	-	-	-	-	-	-	-	-	His_Phos_1
Ssa01000642.t1	3847.GLYMA16G05400.1	6.9e-158	449	COG1028@1|root,KOG0725@2759|Eukaryota,37NDT@33090|Viridiplantae,3G740@35493|Streptophyta,4JIBX@91835|fabids	35493|Streptophyta	Q	Enoyl-(Acyl carrier protein) reductase	-	-	-	-	-	-	-	-	-	-	-	adh_short_C2
Ssa01000643.t1	29760.VIT_14s0068g01200.t01	2.81e-239	674	28I79@1|root,2QQ2A@2759|Eukaryota,37RTU@33090|Viridiplantae,3G8T1@35493|Streptophyta	35493|Streptophyta	K	Transcription factor	-	GO:0003674,GO:0003676,GO:0003677,GO:0003700,GO:0005488,GO:0005575,GO:0005622,GO:0005623,GO:0005634,GO:0006355,GO:0006950,GO:0007275,GO:0008150,GO:0009266,GO:0009409,GO:0009628,GO:0009791,GO:0009888,GO:0009889,GO:0009891,GO:0009893,GO:0009987,GO:0010374,GO:0010440,GO:0010444,GO:0010468,GO:0010556,GO:0010557,GO:0010604,GO:0010628,GO:0019219,GO:0019222,GO:0030154,GO:0031323,GO:0031325,GO:0031326,GO:…	-	-	-	-	-	-	-	-	-	HLH
Ssa01000644.t1	3885.XP_007151723.1	2.96e-296	820	COG0527@1|root,KOG0456@2759|Eukaryota,37J4Y@33090|Viridiplantae,3GBKM@35493|Streptophyta,4JIWR@91835|fabids	35493|Streptophyta	E	Aspartokinase	-	GO:0003674,GO:0003824,GO:0004072,GO:0005575,GO:0005622,GO:0005623,GO:0005737,GO:0006082,GO:0006520,GO:0006793,GO:0006796,GO:0006807,GO:0008150,GO:0008152,GO:0008652,GO:0009058,GO:0009507,GO:0009532,GO:0009536,GO:0009570,GO:0009987,GO:0016053,GO:0016301,GO:0016310,GO:0016740,GO:0016772,GO:0016774,GO:0019202,GO:0019752,GO:0043226,GO:0043227,GO:0043229,GO:0043231,GO:0043436,GO:0044237,GO:0044238,GO:…	2.7.2.4	ko:K00928	ko00260,ko00261,ko00270,ko00300,ko01100,ko01110,ko01120,ko01130,ko01210,ko01230,map00260,map00261,map00270,map00300,map01100,map01110,map01120,map01130,map01210,map01230	M00016,M00017,M00018,M00033,M00525,M00526,M00527	R00480	RC00002,RC00043	ko00000,ko00001,ko00002,ko01000	-	-	AA_kinase
Ssa01000645.t1	3885.XP_007161628.1	0	1142	KOG4197@1|root,KOG4197@2759|Eukaryota,37PUK@33090|Viridiplantae,3G8CV@35493|Streptophyta,4JNJ2@91835|fabids	35493|Streptophyta	S	Pentatricopeptide repeat-containing protein	-	GO:0003674,GO:0003676,GO:0003723,GO:0003824,GO:0004518,GO:0004519,GO:0005488,GO:0005575,GO:0005622,GO:0005623,GO:0006139,GO:0006725,GO:0006807,GO:0008150,GO:0008152,GO:0009451,GO:0009987,GO:0016070,GO:0016787,GO:0016788,GO:0034641,GO:0043170,GO:0043226,GO:0043227,GO:0043229,GO:0043231,GO:0043412,GO:0044237,GO:0044238,GO:0044424,GO:0044464,GO:0046483,GO:0071704,GO:0090304,GO:0090305,GO:0097159,GO:…	-	-	-	-	-	-	-	-	-	DYW_deaminase,PPR,PPR_2
Ssa01000646.t1	3885.XP_007161620.1	0	1684	KOG1959@1|root,KOG1959@2759|Eukaryota,37JT3@33090|Viridiplantae,3G8X5@35493|Streptophyta,4JD00@91835|fabids	35493|Streptophyta	G	Lysosomal	-	GO:0000323,GO:0001775,GO:0002252,GO:0002263,GO:0002274,GO:0002275,GO:0002283,GO:0002366,GO:0002376,GO:0002443,GO:0002444,GO:0002446,GO:0003674,GO:0003824,GO:0004553,GO:0004559,GO:0005575,GO:0005576,GO:0005615,GO:0005622,GO:0005623,GO:0005737,GO:0005764,GO:0005766,GO:0005773,GO:0005775,GO:0005975,GO:0005996,GO:0006013,GO:0006464,GO:0006517,GO:0006807,GO:0006810,GO:0006887,GO:0006955,GO:0008150,GO:…	3.2.1.24	ko:K01191	ko00511,map00511	-	-	-	ko00000,ko00001,ko01000,ko04131	-	GH38	Alpha-mann_mid,Glyco_hydro_38,Glyco_hydro_38C
Ssa01000646.t2	3885.XP_007161620.1	0	1679	KOG1959@1|root,KOG1959@2759|Eukaryota,37JT3@33090|Viridiplantae,3G8X5@35493|Streptophyta,4JD00@91835|fabids	35493|Streptophyta	G	Lysosomal	-	GO:0000323,GO:0001775,GO:0002252,GO:0002263,GO:0002274,GO:0002275,GO:0002283,GO:0002366,GO:0002376,GO:0002443,GO:0002444,GO:0002446,GO:0003674,GO:0003824,GO:0004553,GO:0004559,GO:0005575,GO:0005576,GO:0005615,GO:0005622,GO:0005623,GO:0005737,GO:0005764,GO:0005766,GO:0005773,GO:0005775,GO:0005975,GO:0005996,GO:0006013,GO:0006464,GO:0006517,GO:0006807,GO:0006810,GO:0006887,GO:0006955,GO:0008150,GO:…	3.2.1.24	ko:K01191	ko00511,map00511	-	-	-	ko00000,ko00001,ko01000,ko04131	-	GH38	Alpha-mann_mid,Glyco_hydro_38,Glyco_hydro_38C
Ssa01000646.t3	3885.XP_007161620.1	0	1680	KOG1959@1|root,KOG1959@2759|Eukaryota,37JT3@33090|Viridiplantae,3G8X5@35493|Streptophyta,4JD00@91835|fabids	35493|Streptophyta	G	Lysosomal	-	GO:0000323,GO:0001775,GO:0002252,GO:0002263,GO:0002274,GO:0002275,GO:0002283,GO:0002366,GO:0002376,GO:0002443,GO:0002444,GO:0002446,GO:0003674,GO:0003824,GO:0004553,GO:0004559,GO:0005575,GO:0005576,GO:0005615,GO:0005622,GO:0005623,GO:0005737,GO:0005764,GO:0005766,GO:0005773,GO:0005775,GO:0005975,GO:0005996,GO:0006013,GO:0006464,GO:0006517,GO:0006807,GO:0006810,GO:0006887,GO:0006955,GO:0008150,GO:…	3.2.1.24	ko:K01191	ko00511,map00511	-	-	-	ko00000,ko00001,ko01000,ko04131	-	GH38	Alpha-mann_mid,Glyco_hydro_38,Glyco_hydro_38C
Ssa01000648.t1	3885.XP_007161611.1	1.6e-161	456	COG0723@1|root,KOG1671@2759|Eukaryota,37J6S@33090|Viridiplantae,3GAZM@35493|Streptophyta,4JN4U@91835|fabids	35493|Streptophyta	C	Component of the ubiquinol-cytochrome c reductase complex (complex III or cytochrome b-c1 complex), which is a respiratory chain that generates an electrochemical potential coupled to ATP synthesis	-	GO:0003674,GO:0003824,GO:0005488,GO:0005575,GO:0005622,GO:0005623,GO:0005737,GO:0005739,GO:0005740,GO:0005743,GO:0005746,GO:0005750,GO:0006091,GO:0006950,GO:0008121,GO:0008150,GO:0008152,GO:0009055,GO:0009060,GO:0009266,GO:0009408,GO:0009628,GO:0009987,GO:0015980,GO:0016020,GO:0016491,GO:0016679,GO:0016681,GO:0019866,GO:0022900,GO:0031090,GO:0031966,GO:0031967,GO:0031975,GO:0032991,GO:0043167,GO:…	1.10.2.2	ko:K00411	ko00190,ko01100,ko02020,ko04260,ko04714,ko04932,ko05010,ko05012,ko05016,map00190,map01100,map02020,map04260,map04714,map04932,map05010,map05012,map05016	M00151,M00152	-	-	ko00000,ko00001,ko00002,ko01000	-	-	Rieske,UCR_TM
Ssa01000649.t1	3983.cassava4.1_013551m	5e-119	346	2AZTV@1|root,2QR1Q@2759|Eukaryota,37K15@33090|Viridiplantae,3GC8H@35493|Streptophyta,4JIGE@91835|fabids	35493|Streptophyta	S	Cofactor assembly of complex C subunit B	-	GO:0005575,GO:0005622,GO:0005623,GO:0005737,GO:0008150,GO:0009507,GO:0009536,GO:0009987,GO:0010190,GO:0016043,GO:0017004,GO:0022607,GO:0034622,GO:0043226,GO:0043227,GO:0043229,GO:0043231,GO:0043933,GO:0044085,GO:0044424,GO:0044444,GO:0044464,GO:0065003,GO:0071840	-	-	-	-	-	-	-	-	-	CCB1
Ssa01000649.t2	3885.XP_007151716.1	3.9e-134	386	2AZTV@1|root,2QR1Q@2759|Eukaryota,37K15@33090|Viridiplantae,3GC8H@35493|Streptophyta,4JIGE@91835|fabids	35493|Streptophyta	S	Cofactor assembly of complex C subunit B	-	GO:0005575,GO:0005622,GO:0005623,GO:0005737,GO:0008150,GO:0009507,GO:0009536,GO:0009987,GO:0010190,GO:0016043,GO:0017004,GO:0022607,GO:0034622,GO:0043226,GO:0043227,GO:0043229,GO:0043231,GO:0043933,GO:0044085,GO:0044424,GO:0044444,GO:0044464,GO:0065003,GO:0071840	-	-	-	-	-	-	-	-	-	CCB1
Ssa01000650.t1	3885.XP_007151714.1	0	948	28HJS@1|root,2QPXI@2759|Eukaryota,37R6G@33090|Viridiplantae,3GEAJ@35493|Streptophyta,4JIP7@91835|fabids	35493|Streptophyta	-	-	-	-	-	-	-	-	-	-	-	-	-	-
Ssa01000651.t1	3847.GLYMA19G27800.2	2.26e-308	846	28NRX@1|root,2QVBY@2759|Eukaryota,37M3U@33090|Viridiplantae,3GCJ0@35493|Streptophyta,4JNK3@91835|fabids	35493|Streptophyta	S	Protein of unknown function (DUF3754)	-	-	-	-	-	-	-	-	-	-	-	DUF3754
Ssa01000652.t1	2711.XP_006468920.1	6.27e-105	321	28NQD@1|root,2QUJ9@2759|Eukaryota,37HNA@33090|Viridiplantae,3GER9@35493|Streptophyta	35493|Streptophyta	S	UPF0496 protein	-	-	-	-	-	-	-	-	-	-	-	DUF677
Ssa01000653.t1	29760.VIT_18s0122g00080.t01	5.42e-81	259	28NQD@1|root,2QUJ9@2759|Eukaryota,37HNA@33090|Viridiplantae,3GER9@35493|Streptophyta	35493|Streptophyta	S	UPF0496 protein	-	-	-	-	-	-	-	-	-	-	-	DUF677
Ssa01000653.t2	29760.VIT_18s0122g00080.t01	1.63e-89	281	28NQD@1|root,2QUJ9@2759|Eukaryota,37HNA@33090|Viridiplantae,3GER9@35493|Streptophyta	35493|Streptophyta	S	UPF0496 protein	-	-	-	-	-	-	-	-	-	-	-	DUF677
Ssa01000654.t1	3847.GLYMA19G27870.2	1.88e-217	606	COG0515@1|root,KOG1187@2759|Eukaryota,37M91@33090|Viridiplantae,3G8TK@35493|Streptophyta,4JIZR@91835|fabids	35493|Streptophyta	T	Belongs to the protein kinase superfamily	-	-	-	-	-	-	-	-	-	-	-	Pkinase_Tyr
Ssa01000655.t1	3847.GLYMA19G27930.1	7.5e-264	724	COG3424@1|root,2QRSY@2759|Eukaryota,37MT6@33090|Viridiplantae,3G7AK@35493|Streptophyta,4JSB3@91835|fabids	35493|Streptophyta	H	Belongs to the chalcone stilbene synthases family	CHS2	-	2.3.1.159,2.3.1.74	ko:K00660,ko:K12644	ko00941,ko01058,ko01100,ko01110,ko04712,map00941,map01058,map01100,map01110,map04712	M00137	R01613,R06568,R07250,R07987,R07988,R07989	RC00004,RC02726,RC02952	ko00000,ko00001,ko00002,ko01000,ko01008	-	-	Chal_sti_synt_C,Chal_sti_synt_N
Ssa01000656.t1	3847.GLYMA19G28020.1	3.31e-258	718	KOG0036@1|root,KOG0036@2759|Eukaryota,37NMX@33090|Viridiplantae,3G7CF@35493|Streptophyta,4JT4R@91835|fabids	35493|Streptophyta	C	Belongs to the mitochondrial carrier (TC 2.A.29) family	-	GO:0000295,GO:0003674,GO:0005215,GO:0005346,GO:0005347,GO:0005488,GO:0005509,GO:0005575,GO:0005622,GO:0005623,GO:0005737,GO:0005739,GO:0005740,GO:0005743,GO:0006810,GO:0006811,GO:0006820,GO:0006839,GO:0006855,GO:0006862,GO:0006950,GO:0006979,GO:0008150,GO:0008509,GO:0008514,GO:0009987,GO:0010035,GO:0010038,GO:0010941,GO:0015075,GO:0015215,GO:0015216,GO:0015217,GO:0015238,GO:0015605,GO:0015711,GO:…	-	ko:K14684	-	-	-	-	ko00000,ko02000	2.A.29.23	-	EF-hand_5,EF-hand_7,EF-hand_8,Mito_carr
Ssa01000657.t1	3827.XP_004485881.1	5.93e-59	181	COG2051@1|root,KOG1779@2759|Eukaryota,37V9A@33090|Viridiplantae,3GJN1@35493|Streptophyta,4JUH6@91835|fabids	35493|Streptophyta	J	40S ribosomal protein	-	GO:0000028,GO:0003674,GO:0003735,GO:0005198,GO:0005575,GO:0005618,GO:0005622,GO:0005623,GO:0005737,GO:0005829,GO:0005840,GO:0005844,GO:0005911,GO:0006412,GO:0006518,GO:0006807,GO:0006996,GO:0008150,GO:0008152,GO:0009058,GO:0009059,GO:0009506,GO:0009987,GO:0010467,GO:0015935,GO:0016043,GO:0019538,GO:0022607,GO:0022613,GO:0022618,GO:0022626,GO:0022627,GO:0030054,GO:0030312,GO:0032991,GO:0034622,GO:…	-	ko:K02978	ko03010,map03010	M00177,M00179	-	-	br01610,ko00000,ko00001,ko00002,ko03011	-	-	Ribosomal_S27e
Ssa01000658.t1	3885.XP_007151706.1	9.36e-107	314	COG0494@1|root,KOG2839@2759|Eukaryota,37U0R@33090|Viridiplantae,3GCVZ@35493|Streptophyta,4JNZP@91835|fabids	35493|Streptophyta	T	Nudix hydrolase	-	GO:0003674,GO:0003824,GO:0004551,GO:0005575,GO:0005622,GO:0005623,GO:0005634,GO:0005737,GO:0005739,GO:0016462,GO:0016787,GO:0016817,GO:0016818,GO:0034432,GO:0043226,GO:0043227,GO:0043229,GO:0043231,GO:0044424,GO:0044444,GO:0044464	3.6.1.52	ko:K07766	-	-	-	-	ko00000,ko01000	-	-	NUDIX
Ssa01000659.t1	3847.GLYMA02G07460.1	7.47e-85	262	2CXMA@1|root,2RYDI@2759|Eukaryota,37UD9@33090|Viridiplantae,3GICZ@35493|Streptophyta,4JVSF@91835|fabids	35493|Streptophyta	K	DNA-binding domain in plant proteins such as APETALA2 and EREBPs	-	GO:0001101,GO:0003674,GO:0003700,GO:0006355,GO:0008150,GO:0009719,GO:0009725,GO:0009739,GO:0009889,GO:0010029,GO:0010030,GO:0010033,GO:0010468,GO:0010556,GO:0019219,GO:0019222,GO:0031323,GO:0031326,GO:0033993,GO:0042221,GO:0048518,GO:0048580,GO:0048582,GO:0050789,GO:0050793,GO:0050794,GO:0050896,GO:0051094,GO:0051171,GO:0051239,GO:0051240,GO:0051252,GO:0060255,GO:0065007,GO:0080090,GO:0140110,GO:…	-	ko:K09286	-	-	-	-	ko00000,ko03000	-	-	AP2,LTP_2
Ssa01000660.t1	3847.GLYMA19G28110.1	0	1283	COG3158@1|root,2QPSA@2759|Eukaryota,37NFA@33090|Viridiplantae,3G9MQ@35493|Streptophyta,4JHF9@91835|fabids	35493|Streptophyta	P	Potassium transporter	-	GO:0000902,GO:0003674,GO:0005215,GO:0005575,GO:0005622,GO:0005623,GO:0005737,GO:0005773,GO:0005774,GO:0006810,GO:0006811,GO:0006812,GO:0006813,GO:0008150,GO:0008324,GO:0009653,GO:0009826,GO:0009932,GO:0009987,GO:0015075,GO:0015077,GO:0015079,GO:0015318,GO:0015672,GO:0016020,GO:0016043,GO:0016049,GO:0022857,GO:0022890,GO:0030001,GO:0031090,GO:0032502,GO:0032989,GO:0034220,GO:0040007,GO:0043226,GO:…	-	ko:K03549	-	-	-	-	ko00000,ko02000	2.A.72	-	K_trans
Ssa01000660.t2	3847.GLYMA19G28110.1	0	1358	COG3158@1|root,2QPSA@2759|Eukaryota,37NFA@33090|Viridiplantae,3G9MQ@35493|Streptophyta,4JHF9@91835|fabids	35493|Streptophyta	P	Potassium transporter	-	GO:0000902,GO:0003674,GO:0005215,GO:0005575,GO:0005622,GO:0005623,GO:0005737,GO:0005773,GO:0005774,GO:0006810,GO:0006811,GO:0006812,GO:0006813,GO:0008150,GO:0008324,GO:0009653,GO:0009826,GO:0009932,GO:0009987,GO:0015075,GO:0015077,GO:0015079,GO:0015318,GO:0015672,GO:0016020,GO:0016043,GO:0016049,GO:0022857,GO:0022890,GO:0030001,GO:0031090,GO:0032502,GO:0032989,GO:0034220,GO:0040007,GO:0043226,GO:…	-	ko:K03549	-	-	-	-	ko00000,ko02000	2.A.72	-	K_trans
Ssa01000662.t1	3885.XP_007161801.1	5.43e-121	353	COG5325@1|root,KOG0811@2759|Eukaryota,37SS2@33090|Viridiplantae,3GF86@35493|Streptophyta,4JMKR@91835|fabids	35493|Streptophyta	U	Syntaxin-like protein	-	-	-	-	-	-	-	-	-	-	-	SNARE,Syntaxin_2
Ssa01000663.t1	4006.Lus10041505	6.74e-142	409	28KYS@1|root,2QTFJ@2759|Eukaryota,37T3A@33090|Viridiplantae,3G96R@35493|Streptophyta,4JHMN@91835|fabids	35493|Streptophyta	S	Family of unknown function (DUF716)	-	-	-	-	-	-	-	-	-	-	-	DUF716
Ssa01000664.t1	3885.XP_007151693.1	1.11e-254	706	KOG2922@1|root,KOG2922@2759|Eukaryota,37P3B@33090|Viridiplantae,3GFNA@35493|Streptophyta,4JNK1@91835|fabids	35493|Streptophyta	P	Acts as a Mg(2 ) transporter. Can also transport other divalent cations such as Fe(2 ), Sr(2 ), Ba(2 ), Mn(2 ) and Co(2 ) but to a much less extent than Mg(2 )	-	GO:0005575,GO:0005622,GO:0005623,GO:0005737,GO:0005768,GO:0005769,GO:0005886,GO:0006810,GO:0006811,GO:0006812,GO:0008150,GO:0012505,GO:0015693,GO:0016020,GO:0030001,GO:0031410,GO:0031982,GO:0043226,GO:0043227,GO:0043229,GO:0044424,GO:0044444,GO:0044464,GO:0051179,GO:0051234,GO:0070838,GO:0071944,GO:0072511,GO:0097708	-	-	-	-	-	-	-	-	-	Mg_trans_NIPA
Ssa01000665.t1	3885.XP_007151691.1	3.81e-78	239	29220@1|root,2R8YE@2759|Eukaryota,37T3T@33090|Viridiplantae,3GHQ5@35493|Streptophyta,4JQ7V@91835|fabids	35493|Streptophyta	S	Cotton fibre expressed protein	-	-	-	-	-	-	-	-	-	-	-	DUF761
Ssa01000666.t1	3847.GLYMA19G28190.1	1.08e-67	213	2AN50@1|root,2RZDI@2759|Eukaryota,37UU3@33090|Viridiplantae,3GJ2D@35493|Streptophyta,4JPCY@91835|fabids	35493|Streptophyta	S	Cotton fibre expressed protein	-	-	-	-	-	-	-	-	-	-	-	DUF761
Ssa01000667.t1	3847.GLYMA02G07620.1	1.11e-145	412	KOG2605@1|root,KOG2605@2759|Eukaryota,37HK6@33090|Viridiplantae,3GFJ2@35493|Streptophyta,4JE3R@91835|fabids	35493|Streptophyta	OT	OTU domain-containing protein	-	-	-	-	-	-	-	-	-	-	-	OTU
Ssa01000668.t2	3847.GLYMA02G07610.1	9.44e-203	563	COG2273@1|root,2QQUC@2759|Eukaryota,37N4A@33090|Viridiplantae,3GC5J@35493|Streptophyta,4JS0H@91835|fabids	35493|Streptophyta	G	Catalyzes xyloglucan endohydrolysis (XEH) and or endotransglycosylation (XET). Cleaves and religates xyloglucan polymers, an essential constituent of the primary cell wall, and thereby participates in cell wall construction of growing tissues	XTH	GO:0000902,GO:0003674,GO:0003824,GO:0005575,GO:0005576,GO:0005618,GO:0005622,GO:0005623,GO:0005737,GO:0005911,GO:0008150,GO:0009314,GO:0009416,GO:0009505,GO:0009506,GO:0009507,GO:0009536,GO:0009605,GO:0009612,GO:0009628,GO:0009642,GO:0009645,GO:0009653,GO:0009719,GO:0009725,GO:0009733,GO:0009826,GO:0009987,GO:0010033,GO:0016020,GO:0016043,GO:0016049,GO:0016740,GO:0016757,GO:0016758,GO:0016762,GO:…	2.4.1.207	ko:K08235	-	-	-	-	ko00000,ko01000	-	-	Glyco_hydro_16,XET_C
Ssa01000668.t1	3847.GLYMA02G07610.1	1.64e-202	561	COG2273@1|root,2QQUC@2759|Eukaryota,37N4A@33090|Viridiplantae,3GC5J@35493|Streptophyta,4JS0H@91835|fabids	35493|Streptophyta	G	Catalyzes xyloglucan endohydrolysis (XEH) and or endotransglycosylation (XET). Cleaves and religates xyloglucan polymers, an essential constituent of the primary cell wall, and thereby participates in cell wall construction of growing tissues	XTH	GO:0000902,GO:0003674,GO:0003824,GO:0005575,GO:0005576,GO:0005618,GO:0005622,GO:0005623,GO:0005737,GO:0005911,GO:0008150,GO:0009314,GO:0009416,GO:0009505,GO:0009506,GO:0009507,GO:0009536,GO:0009605,GO:0009612,GO:0009628,GO:0009642,GO:0009645,GO:0009653,GO:0009719,GO:0009725,GO:0009733,GO:0009826,GO:0009987,GO:0010033,GO:0016020,GO:0016043,GO:0016049,GO:0016740,GO:0016757,GO:0016758,GO:0016762,GO:…	2.4.1.207	ko:K08235	-	-	-	-	ko00000,ko01000	-	-	Glyco_hydro_16,XET_C
Ssa01000669.t1	3656.XP_008449974.1	2.58e-260	717	COG0057@1|root,KOG0657@2759|Eukaryota,37HWX@33090|Viridiplantae,3GBM3@35493|Streptophyta,4JSS0@91835|fabids	35493|Streptophyta	G	Belongs to the glyceraldehyde-3-phosphate dehydrogenase family	-	GO:0008150,GO:0009314,GO:0009416,GO:0009628,GO:0050896	1.2.1.13	ko:K05298	ko00710,ko01100,ko01120,ko01200,map00710,map01100,map01120,map01200	M00165,M00166	R01063	RC00149	ko00000,ko00001,ko00002,ko01000	-	-	Gp_dh_C,Gp_dh_N
Ssa01000670.t1	3827.XP_004493117.1	4.23e-245	674	KOG0290@1|root,KOG0290@2759|Eukaryota,37RFZ@33090|Viridiplantae,3GAX6@35493|Streptophyta,4JJSS@91835|fabids	35493|Streptophyta	S	WD repeat-containing protein	-	GO:0000003,GO:0001067,GO:0003006,GO:0003674,GO:0003676,GO:0003677,GO:0005488,GO:0005575,GO:0005622,GO:0005623,GO:0005634,GO:0007275,GO:0008150,GO:0008152,GO:0009058,GO:0009314,GO:0009416,GO:0009605,GO:0009628,GO:0009648,GO:0009649,GO:0009718,GO:0009791,GO:0009812,GO:0009813,GO:0010228,GO:0022414,GO:0032501,GO:0032502,GO:0042440,GO:0042752,GO:0043153,GO:0043226,GO:0043227,GO:0043229,GO:0043231,GO:…	-	ko:K11805	-	-	-	-	ko00000,ko04121	-	-	WD40
Ssa01000671.t1	4432.XP_010264350.1	2.97e-303	828	COG1503@1|root,KOG0688@2759|Eukaryota,37HQU@33090|Viridiplantae,3GBN1@35493|Streptophyta	35493|Streptophyta	J	eukaryotic peptide chain release factor subunit	ERF1-2	GO:0003674,GO:0003676,GO:0003723,GO:0003747,GO:0005488,GO:0005575,GO:0005622,GO:0005623,GO:0005737,GO:0005829,GO:0005886,GO:0006412,GO:0006415,GO:0006518,GO:0006807,GO:0008079,GO:0008135,GO:0008150,GO:0008152,GO:0009058,GO:0009059,GO:0009987,GO:0010467,GO:0016020,GO:0016043,GO:0019538,GO:0022411,GO:0032984,GO:0034641,GO:0034645,GO:0043043,GO:0043170,GO:0043603,GO:0043604,GO:0043624,GO:0043933,GO:…	-	ko:K03265	ko03015,map03015	-	-	-	ko00000,ko00001,ko03012,ko03019	-	-	eRF1_1,eRF1_2,eRF1_3
Ssa01000672.t1	3827.XP_004493123.1	1.52e-99	296	29VFE@1|root,2RXKY@2759|Eukaryota,37U03@33090|Viridiplantae,3GHF1@35493|Streptophyta,4JP5Z@91835|fabids	35493|Streptophyta	S	Potential DNA-binding domain	-	-	-	ko:K18401	-	-	-	-	ko00000,ko03036	-	-	zf-C3Hc3H
Ssa01000673.t1	3847.GLYMA16G26650.1	1.18e-234	656	28KS7@1|root,2QT8C@2759|Eukaryota,37QF4@33090|Viridiplantae,3GC0W@35493|Streptophyta,4JMVK@91835|fabids	35493|Streptophyta	S	Omega-hydroxypalmitate O-feruloyl	-	GO:0000271,GO:0003674,GO:0003824,GO:0005975,GO:0005976,GO:0006725,GO:0008150,GO:0008152,GO:0009058,GO:0009059,GO:0009664,GO:0009698,GO:0009699,GO:0009832,GO:0009987,GO:0010345,GO:0010383,GO:0010393,GO:0016043,GO:0016051,GO:0016740,GO:0016746,GO:0016747,GO:0017144,GO:0019438,GO:0019748,GO:0033692,GO:0034637,GO:0034645,GO:0042546,GO:0043170,GO:0044036,GO:0044038,GO:0044085,GO:0044237,GO:0044238,GO:…	2.3.1.188	ko:K15400	ko00073,map00073	-	R09106	RC00004,RC00041	ko00000,ko00001,ko01000	-	-	Transferase
Ssa01000674.t1	29730.Gorai.004G264600.1	6.77e-99	290	COG1881@1|root,KOG3346@2759|Eukaryota,37RRQ@33090|Viridiplantae,3GAD4@35493|Streptophyta	35493|Streptophyta	S	Protein HEADING DATE	FT	GO:0000003,GO:0003006,GO:0003674,GO:0005488,GO:0005543,GO:0005575,GO:0005622,GO:0005623,GO:0005634,GO:0007275,GO:0008150,GO:0008289,GO:0008429,GO:0009314,GO:0009416,GO:0009628,GO:0009648,GO:0009791,GO:0009909,GO:0010228,GO:0010229,GO:0022414,GO:0032501,GO:0032502,GO:0040034,GO:0043167,GO:0043168,GO:0043226,GO:0043227,GO:0043229,GO:0043231,GO:0044424,GO:0044464,GO:0048367,GO:0048506,GO:0048509,GO:…	-	ko:K16223	ko04712,map04712	-	-	-	ko00000,ko00001	-	-	PBP
Ssa01000675.t1	28532.XP_010551361.1	1.11e-91	272	COG1881@1|root,KOG3346@2759|Eukaryota,37R35@33090|Viridiplantae,3GCRA@35493|Streptophyta,3HMMG@3699|Brassicales	35493|Streptophyta	S	phosphatidylethanolamine binding	-	GO:0000003,GO:0003006,GO:0003674,GO:0005488,GO:0005543,GO:0005575,GO:0005622,GO:0005623,GO:0005634,GO:0005737,GO:0007275,GO:0008150,GO:0008289,GO:0008429,GO:0009314,GO:0009416,GO:0009628,GO:0009648,GO:0009791,GO:0009909,GO:0009911,GO:0010119,GO:0010228,GO:0022414,GO:0032501,GO:0032502,GO:0043167,GO:0043168,GO:0043226,GO:0043227,GO:0043229,GO:0043231,GO:0044424,GO:0044464,GO:0048518,GO:0048573,GO:…	-	ko:K16223	ko04712,map04712	-	-	-	ko00000,ko00001	-	-	PBP
Ssa01000676.t1	3847.GLYMA16G04800.1	6.76e-136	389	COG0580@1|root,KOG0223@2759|Eukaryota,37P7M@33090|Viridiplantae,3GDHP@35493|Streptophyta,4JKY6@91835|fabids	35493|Streptophyta	G	Belongs to the MIP aquaporin (TC 1.A.8) family	-	GO:0003674,GO:0005215,GO:0005372,GO:0005575,GO:0005622,GO:0005623,GO:0005737,GO:0005783,GO:0005886,GO:0005887,GO:0006810,GO:0006811,GO:0006833,GO:0008150,GO:0012505,GO:0015250,GO:0015267,GO:0015318,GO:0016020,GO:0016021,GO:0022803,GO:0022838,GO:0022857,GO:0031224,GO:0031226,GO:0034220,GO:0042044,GO:0043226,GO:0043227,GO:0043229,GO:0043231,GO:0044424,GO:0044425,GO:0044444,GO:0044459,GO:0044464,GO:…	-	ko:K09875	-	-	-	-	ko00000,ko02000	1.A.8	-	MIP
Ssa01000677.t1	3827.XP_004493131.1	1.29e-288	794	COG5371@1|root,KOG1385@2759|Eukaryota,37J47@33090|Viridiplantae,3GA30@35493|Streptophyta,4JHYQ@91835|fabids	35493|Streptophyta	F	Belongs to the GDA1 CD39 NTPase family	-	GO:0005575,GO:0005622,GO:0005623,GO:0005634,GO:0043226,GO:0043227,GO:0043229,GO:0043231,GO:0044424,GO:0044464	3.6.1.5	ko:K14641	ko00230,ko00240,map00230,map00240	-	R00086,R00122,R00155,R00159,R00328,R00335,R00514,R00569,R00719,R00961,R02092,R02095	RC00002	ko00000,ko00001,ko01000	-	-	GDA1_CD39
Ssa01000678.t1	3847.GLYMA16G04781.1	1.82e-181	533	KOG4197@1|root,KOG4197@2759|Eukaryota,37JR2@33090|Viridiplantae,3GDA0@35493|Streptophyta,4JG2A@91835|fabids	35493|Streptophyta	S	Pentatricopeptide repeat-containing protein	-	GO:0003674,GO:0003676,GO:0003723,GO:0003824,GO:0004518,GO:0004519,GO:0005488,GO:0005575,GO:0005622,GO:0005623,GO:0006139,GO:0006725,GO:0006807,GO:0008150,GO:0008152,GO:0009451,GO:0009987,GO:0016070,GO:0016787,GO:0016788,GO:0034641,GO:0043170,GO:0043226,GO:0043227,GO:0043229,GO:0043231,GO:0043412,GO:0044237,GO:0044238,GO:0044424,GO:0044464,GO:0046483,GO:0071704,GO:0090304,GO:0090305,GO:0097159,GO:…	-	-	-	-	-	-	-	-	-	PPR,PPR_2,PPR_3
Ssa01000679.t2	3847.GLYMA16G04740.1	2.83e-139	407	28K4E@1|root,2QSIY@2759|Eukaryota,37M1A@33090|Viridiplantae,3GEE0@35493|Streptophyta,4JSJB@91835|fabids	35493|Streptophyta	K	NAC transcription factor	-	GO:0000003,GO:0003006,GO:0003674,GO:0003700,GO:0005575,GO:0005622,GO:0005623,GO:0005634,GO:0006355,GO:0007275,GO:0007568,GO:0008150,GO:0009790,GO:0009791,GO:0009793,GO:0009825,GO:0009835,GO:0009889,GO:0009908,GO:0009987,GO:0010150,GO:0010154,GO:0010468,GO:0010556,GO:0016049,GO:0019219,GO:0019222,GO:0021700,GO:0022414,GO:0031323,GO:0031326,GO:0032501,GO:0032502,GO:0040007,GO:0043226,GO:0043227,GO:…	-	-	-	-	-	-	-	-	-	NAM
Ssa01000679.t1	3847.GLYMA16G04740.1	6.26e-140	407	28K4E@1|root,2QSIY@2759|Eukaryota,37M1A@33090|Viridiplantae,3GEE0@35493|Streptophyta,4JSJB@91835|fabids	35493|Streptophyta	K	NAC transcription factor	-	GO:0000003,GO:0003006,GO:0003674,GO:0003700,GO:0005575,GO:0005622,GO:0005623,GO:0005634,GO:0006355,GO:0007275,GO:0007568,GO:0008150,GO:0009790,GO:0009791,GO:0009793,GO:0009825,GO:0009835,GO:0009889,GO:0009908,GO:0009987,GO:0010150,GO:0010154,GO:0010468,GO:0010556,GO:0016049,GO:0019219,GO:0019222,GO:0021700,GO:0022414,GO:0031323,GO:0031326,GO:0032501,GO:0032502,GO:0040007,GO:0043226,GO:0043227,GO:…	-	-	-	-	-	-	-	-	-	NAM
Ssa01000680.t1	3885.XP_007161814.1	5.2e-134	396	2CMY9@1|root,2QSPY@2759|Eukaryota,37S17@33090|Viridiplantae,3GARP@35493|Streptophyta,4JHZ9@91835|fabids	35493|Streptophyta	K	NAC domain-containing protein	-	GO:0003674,GO:0003700,GO:0006355,GO:0008150,GO:0009889,GO:0010468,GO:0010556,GO:0019219,GO:0019222,GO:0031323,GO:0031326,GO:0050789,GO:0050794,GO:0051171,GO:0051252,GO:0060255,GO:0065007,GO:0080090,GO:0140110,GO:1903506,GO:2000112,GO:2001141	-	-	-	-	-	-	-	-	-	NAM
Ssa01000681.t1	3885.XP_007161924.1	2.74e-133	386	COG0526@1|root,KOG0907@2759|Eukaryota,37IY5@33090|Viridiplantae,3G917@35493|Streptophyta,4JEXT@91835|fabids	35493|Streptophyta	O	Thioredoxin-like 1-1	-	GO:0003674,GO:0003824,GO:0005575,GO:0005622,GO:0005623,GO:0005737,GO:0008150,GO:0008152,GO:0009507,GO:0009526,GO:0009532,GO:0009536,GO:0009570,GO:0009941,GO:0016020,GO:0016491,GO:0016667,GO:0016671,GO:0031090,GO:0031967,GO:0031969,GO:0031975,GO:0042170,GO:0043226,GO:0043227,GO:0043229,GO:0043231,GO:0044422,GO:0044424,GO:0044434,GO:0044435,GO:0044444,GO:0044446,GO:0044464,GO:0055114	-	-	-	-	-	-	-	-	-	Thioredoxin
Ssa01000682.t1	3847.GLYMA16G26820.2	3.97e-145	425	28KRG@1|root,2QT7M@2759|Eukaryota,37JPQ@33090|Viridiplantae,3G9MV@35493|Streptophyta,4JFYY@91835|fabids	35493|Streptophyta	K	MYB-CC type transfactor, LHEQLE motif	-	GO:0003674,GO:0003700,GO:0005575,GO:0005622,GO:0005623,GO:0005634,GO:0006355,GO:0008150,GO:0009888,GO:0009889,GO:0009891,GO:0009893,GO:0010087,GO:0010088,GO:0010089,GO:0010468,GO:0010556,GO:0010557,GO:0010604,GO:0010628,GO:0019219,GO:0019222,GO:0031323,GO:0031325,GO:0031326,GO:0031328,GO:0032502,GO:0043226,GO:0043227,GO:0043229,GO:0043231,GO:0044424,GO:0044464,GO:0045893,GO:0045935,GO:0048518,GO:…	-	-	-	-	-	-	-	-	-	Myb_CC_LHEQLE,Myb_DNA-binding
Ssa01000682.t2	3847.GLYMA16G26820.2	5.49e-153	445	28KRG@1|root,2QT7M@2759|Eukaryota,37JPQ@33090|Viridiplantae,3G9MV@35493|Streptophyta,4JFYY@91835|fabids	35493|Streptophyta	K	MYB-CC type transfactor, LHEQLE motif	-	GO:0003674,GO:0003700,GO:0005575,GO:0005622,GO:0005623,GO:0005634,GO:0006355,GO:0008150,GO:0009888,GO:0009889,GO:0009891,GO:0009893,GO:0010087,GO:0010088,GO:0010089,GO:0010468,GO:0010556,GO:0010557,GO:0010604,GO:0010628,GO:0019219,GO:0019222,GO:0031323,GO:0031325,GO:0031326,GO:0031328,GO:0032502,GO:0043226,GO:0043227,GO:0043229,GO:0043231,GO:0044424,GO:0044464,GO:0045893,GO:0045935,GO:0048518,GO:…	-	-	-	-	-	-	-	-	-	Myb_CC_LHEQLE,Myb_DNA-binding
Ssa01000683.t1	3847.GLYMA16G26840.2	2.32e-61	202	KOG0800@1|root,KOG0800@2759|Eukaryota,37S75@33090|Viridiplantae,3GEA7@35493|Streptophyta,4JMNT@91835|fabids	35493|Streptophyta	O	E3 ubiquitin-protein ligase	-	-	2.3.2.27	ko:K11982	-	-	-	-	ko00000,ko01000,ko04121,ko04131	-	-	zf-RING_2,zinc_ribbon_9
Ssa01000684.t1	3847.GLYMA02G07820.2	8.13e-14	72.4	KOG0800@1|root,KOG0800@2759|Eukaryota,37S75@33090|Viridiplantae,3GHS6@35493|Streptophyta,4JVI9@91835|fabids	35493|Streptophyta	O	RING-like zinc finger	-	-	2.3.2.27	ko:K11982	-	-	-	-	ko00000,ko01000,ko04121,ko04131	-	-	zf-RING_2,zinc_ribbon_9
Ssa01000685.t1	3847.GLYMA16G04690.2	0	1250	COG5665@1|root,KOG2150@2759|Eukaryota,37KA5@33090|Viridiplantae,3GBBS@35493|Streptophyta,4JJYE@91835|fabids	35493|Streptophyta	K	General negative regulator of transcription subunit	-	GO:0000075,GO:0000077,GO:0000278,GO:0000288,GO:0000289,GO:0000932,GO:0000956,GO:0001701,GO:0001824,GO:0001825,GO:0001829,GO:0005575,GO:0005622,GO:0005623,GO:0005737,GO:0005829,GO:0006139,GO:0006401,GO:0006402,GO:0006417,GO:0006725,GO:0006807,GO:0006950,GO:0006974,GO:0006977,GO:0007049,GO:0007093,GO:0007154,GO:0007165,GO:0007275,GO:0007346,GO:0008150,GO:0008152,GO:0009056,GO:0009057,GO:0009653,GO:…	-	ko:K12580	ko03018,map03018	-	-	-	ko00000,ko00001,ko03019	-	-	NOT2_3_5,Not3
Ssa01000685.t2	3847.GLYMA16G04690.2	0	1269	COG5665@1|root,KOG2150@2759|Eukaryota,37KA5@33090|Viridiplantae,3GBBS@35493|Streptophyta,4JJYE@91835|fabids	35493|Streptophyta	K	General negative regulator of transcription subunit	-	GO:0000075,GO:0000077,GO:0000278,GO:0000288,GO:0000289,GO:0000932,GO:0000956,GO:0001701,GO:0001824,GO:0001825,GO:0001829,GO:0005575,GO:0005622,GO:0005623,GO:0005737,GO:0005829,GO:0006139,GO:0006401,GO:0006402,GO:0006417,GO:0006725,GO:0006807,GO:0006950,GO:0006974,GO:0006977,GO:0007049,GO:0007093,GO:0007154,GO:0007165,GO:0007275,GO:0007346,GO:0008150,GO:0008152,GO:0009056,GO:0009057,GO:0009653,GO:…	-	ko:K12580	ko03018,map03018	-	-	-	ko00000,ko00001,ko03019	-	-	NOT2_3_5,Not3
Ssa01000685.t3	3847.GLYMA16G04690.2	0	1246	COG5665@1|root,KOG2150@2759|Eukaryota,37KA5@33090|Viridiplantae,3GBBS@35493|Streptophyta,4JJYE@91835|fabids	35493|Streptophyta	K	General negative regulator of transcription subunit	-	GO:0000075,GO:0000077,GO:0000278,GO:0000288,GO:0000289,GO:0000932,GO:0000956,GO:0001701,GO:0001824,GO:0001825,GO:0001829,GO:0005575,GO:0005622,GO:0005623,GO:0005737,GO:0005829,GO:0006139,GO:0006401,GO:0006402,GO:0006417,GO:0006725,GO:0006807,GO:0006950,GO:0006974,GO:0006977,GO:0007049,GO:0007093,GO:0007154,GO:0007165,GO:0007275,GO:0007346,GO:0008150,GO:0008152,GO:0009056,GO:0009057,GO:0009653,GO:…	-	ko:K12580	ko03018,map03018	-	-	-	ko00000,ko00001,ko03019	-	-	NOT2_3_5,Not3
Ssa01000685.t4	3847.GLYMA16G04690.2	0	1232	COG5665@1|root,KOG2150@2759|Eukaryota,37KA5@33090|Viridiplantae,3GBBS@35493|Streptophyta,4JJYE@91835|fabids	35493|Streptophyta	K	General negative regulator of transcription subunit	-	GO:0000075,GO:0000077,GO:0000278,GO:0000288,GO:0000289,GO:0000932,GO:0000956,GO:0001701,GO:0001824,GO:0001825,GO:0001829,GO:0005575,GO:0005622,GO:0005623,GO:0005737,GO:0005829,GO:0006139,GO:0006401,GO:0006402,GO:0006417,GO:0006725,GO:0006807,GO:0006950,GO:0006974,GO:0006977,GO:0007049,GO:0007093,GO:0007154,GO:0007165,GO:0007275,GO:0007346,GO:0008150,GO:0008152,GO:0009056,GO:0009057,GO:0009653,GO:…	-	ko:K12580	ko03018,map03018	-	-	-	ko00000,ko00001,ko03019	-	-	NOT2_3_5,Not3
Ssa01000685.t5	3847.GLYMA16G04690.2	0	1266	COG5665@1|root,KOG2150@2759|Eukaryota,37KA5@33090|Viridiplantae,3GBBS@35493|Streptophyta,4JJYE@91835|fabids	35493|Streptophyta	K	General negative regulator of transcription subunit	-	GO:0000075,GO:0000077,GO:0000278,GO:0000288,GO:0000289,GO:0000932,GO:0000956,GO:0001701,GO:0001824,GO:0001825,GO:0001829,GO:0005575,GO:0005622,GO:0005623,GO:0005737,GO:0005829,GO:0006139,GO:0006401,GO:0006402,GO:0006417,GO:0006725,GO:0006807,GO:0006950,GO:0006974,GO:0006977,GO:0007049,GO:0007093,GO:0007154,GO:0007165,GO:0007275,GO:0007346,GO:0008150,GO:0008152,GO:0009056,GO:0009057,GO:0009653,GO:…	-	ko:K12580	ko03018,map03018	-	-	-	ko00000,ko00001,ko03019	-	-	NOT2_3_5,Not3
Ssa01000685.t6	3847.GLYMA16G04690.2	0	1251	COG5665@1|root,KOG2150@2759|Eukaryota,37KA5@33090|Viridiplantae,3GBBS@35493|Streptophyta,4JJYE@91835|fabids	35493|Streptophyta	K	General negative regulator of transcription subunit	-	GO:0000075,GO:0000077,GO:0000278,GO:0000288,GO:0000289,GO:0000932,GO:0000956,GO:0001701,GO:0001824,GO:0001825,GO:0001829,GO:0005575,GO:0005622,GO:0005623,GO:0005737,GO:0005829,GO:0006139,GO:0006401,GO:0006402,GO:0006417,GO:0006725,GO:0006807,GO:0006950,GO:0006974,GO:0006977,GO:0007049,GO:0007093,GO:0007154,GO:0007165,GO:0007275,GO:0007346,GO:0008150,GO:0008152,GO:0009056,GO:0009057,GO:0009653,GO:…	-	ko:K12580	ko03018,map03018	-	-	-	ko00000,ko00001,ko03019	-	-	NOT2_3_5,Not3
Ssa01000686.t1	3847.GLYMA16G04680.1	3.59e-304	834	28IE0@1|root,2QQQS@2759|Eukaryota,37Q0K@33090|Viridiplantae,3GCJE@35493|Streptophyta,4JF6B@91835|fabids	35493|Streptophyta	G	Belongs to the glycosyl hydrolase 17 family	-	GO:0001871,GO:0003674,GO:0003824,GO:0004553,GO:0005488,GO:0005575,GO:0005576,GO:0005623,GO:0005886,GO:0005911,GO:0008150,GO:0009506,GO:0009664,GO:0009987,GO:0016020,GO:0016043,GO:0016787,GO:0016798,GO:0030054,GO:0030246,GO:0030247,GO:0031224,GO:0031225,GO:0031226,GO:0044425,GO:0044459,GO:0044464,GO:0045229,GO:0046658,GO:0048046,GO:0055044,GO:0071554,GO:0071555,GO:0071669,GO:0071840,GO:0071944	-	-	-	-	-	-	-	-	-	Glyco_hydro_17,X8
Ssa01000687.t1	3885.XP_007161927.1	6.94e-126	365	COG5641@1|root,KOG1601@2759|Eukaryota,37RYC@33090|Viridiplantae,3GE6D@35493|Streptophyta,4JSR5@91835|fabids	35493|Streptophyta	K	GATA transcription factor	-	-	-	ko:K21630	-	-	-	-	ko00000,ko03000	-	-	GATA
Ssa01000688.t1	3885.XP_007161928.1	2.12e-127	370	COG1403@1|root,2QQI3@2759|Eukaryota,37PXC@33090|Viridiplantae,3GEP1@35493|Streptophyta,4JGIF@91835|fabids	35493|Streptophyta	V	HNH endonuclease	-	-	-	-	-	-	-	-	-	-	-	HNH_5
Ssa01000689.t1	2711.XP_006479093.1	6.41e-131	379	COG1028@1|root,KOG0725@2759|Eukaryota,37I6K@33090|Viridiplantae,3GCDJ@35493|Streptophyta	35493|Streptophyta	Q	Short-chain type dehydrogenase	-	-	1.1.1.100	ko:K00059	ko00061,ko00333,ko00780,ko01040,ko01100,ko01130,ko01212,map00061,map00333,map00780,map01040,map01100,map01130,map01212	M00083,M00572	R04533,R04534,R04536,R04543,R04566,R04953,R04964,R07759,R07763,R10116,R10120,R11671	RC00029,RC00117	ko00000,ko00001,ko00002,ko01000,ko01004	-	-	adh_short_C2
Ssa01000690.t2	3847.GLYMA19G28680.1	4.98e-127	368	COG5034@1|root,KOG1973@2759|Eukaryota,37P9K@33090|Viridiplantae,3GE3M@35493|Streptophyta,4JMYK@91835|fabids	35493|Streptophyta	B	PHD finger protein	-	GO:0003674,GO:0005488,GO:0005515,GO:0005575,GO:0005622,GO:0005623,GO:0005634,GO:0035064,GO:0042393,GO:0043226,GO:0043227,GO:0043229,GO:0043231,GO:0044424,GO:0044464,GO:0140030,GO:0140034	-	ko:K11346	-	-	-	-	ko00000,ko03036	-	-	ING,PHD
Ssa01000690.t3	3847.GLYMA19G28680.1	8.58e-128	369	COG5034@1|root,KOG1973@2759|Eukaryota,37P9K@33090|Viridiplantae,3GE3M@35493|Streptophyta,4JMYK@91835|fabids	35493|Streptophyta	B	PHD finger protein	-	GO:0003674,GO:0005488,GO:0005515,GO:0005575,GO:0005622,GO:0005623,GO:0005634,GO:0035064,GO:0042393,GO:0043226,GO:0043227,GO:0043229,GO:0043231,GO:0044424,GO:0044464,GO:0140030,GO:0140034	-	ko:K11346	-	-	-	-	ko00000,ko03036	-	-	ING,PHD
Ssa01000690.t1	3649.evm.model.supercontig_51.101	9.75e-153	433	COG5034@1|root,KOG1973@2759|Eukaryota,37P9K@33090|Viridiplantae,3GE3M@35493|Streptophyta,3HQB1@3699|Brassicales	35493|Streptophyta	B	PHD finger	-	GO:0003674,GO:0005488,GO:0005515,GO:0005575,GO:0005622,GO:0005623,GO:0005634,GO:0035064,GO:0042393,GO:0043226,GO:0043227,GO:0043229,GO:0043231,GO:0044424,GO:0044464,GO:0140030,GO:0140034	-	ko:K11346	-	-	-	-	ko00000,ko03036	-	-	ING,PHD
Ssa01000691.t1	3827.XP_004508667.1	1.01e-193	567	COG1599@1|root,KOG0851@2759|Eukaryota	2759|Eukaryota	L	DNA recombination	-	-	-	ko:K07466	ko03030,ko03420,ko03430,ko03440,ko03460,map03030,map03420,map03430,map03440,map03460	M00288	-	-	ko00000,ko00001,ko00002,ko03000,ko03032,ko03400	-	-	REPA_OB_2,Rep-A_N,Rep_fac-A_C
Ssa01000692.t2	3847.GLYMA16G26900.1	3.8e-179	510	28JU8@1|root,2QS85@2759|Eukaryota,37NMQ@33090|Viridiplantae,3G8AU@35493|Streptophyta,4JKQX@91835|fabids	35493|Streptophyta	S	photosynthetic electron transport in photosystem I	-	GO:0005575,GO:0005622,GO:0005623,GO:0005737,GO:0006091,GO:0008150,GO:0008152,GO:0009507,GO:0009536,GO:0009767,GO:0009773,GO:0009893,GO:0009987,GO:0010468,GO:0010604,GO:0010628,GO:0015979,GO:0016020,GO:0019222,GO:0019684,GO:0022900,GO:0043226,GO:0043227,GO:0043229,GO:0043231,GO:0044237,GO:0044424,GO:0044444,GO:0044464,GO:0048518,GO:0050789,GO:0055114,GO:0060255,GO:0065007	-	-	-	-	-	-	-	-	-	-
Ssa01000692.t1	3847.GLYMA16G26900.1	2.49e-180	513	28JU8@1|root,2QS85@2759|Eukaryota,37NMQ@33090|Viridiplantae,3G8AU@35493|Streptophyta,4JKQX@91835|fabids	35493|Streptophyta	S	photosynthetic electron transport in photosystem I	-	GO:0005575,GO:0005622,GO:0005623,GO:0005737,GO:0006091,GO:0008150,GO:0008152,GO:0009507,GO:0009536,GO:0009767,GO:0009773,GO:0009893,GO:0009987,GO:0010468,GO:0010604,GO:0010628,GO:0015979,GO:0016020,GO:0019222,GO:0019684,GO:0022900,GO:0043226,GO:0043227,GO:0043229,GO:0043231,GO:0044237,GO:0044424,GO:0044444,GO:0044464,GO:0048518,GO:0050789,GO:0055114,GO:0060255,GO:0065007	-	-	-	-	-	-	-	-	-	-
Ssa01000693.t1	3847.GLYMA19G28700.1	5.82e-191	537	28JU8@1|root,2QWGY@2759|Eukaryota,37J2Y@33090|Viridiplantae,3GFR6@35493|Streptophyta,4JH45@91835|fabids	35493|Streptophyta	S	photosynthetic electron transport in photosystem I	-	GO:0005575,GO:0005622,GO:0005623,GO:0005737,GO:0006091,GO:0008150,GO:0008152,GO:0009507,GO:0009534,GO:0009535,GO:0009536,GO:0009579,GO:0009767,GO:0009773,GO:0009987,GO:0010598,GO:0015979,GO:0016020,GO:0019684,GO:0022900,GO:0031976,GO:0031984,GO:0032991,GO:0034357,GO:0042651,GO:0043226,GO:0043227,GO:0043229,GO:0043231,GO:0044237,GO:0044422,GO:0044424,GO:0044425,GO:0044434,GO:0044435,GO:0044436,GO:…	-	-	-	-	-	-	-	-	-	-
Ssa01000695.t1	42345.XP_008776929.1	4.98e-38	135	KOG0362@1|root,KOG0362@2759|Eukaryota,37MYR@33090|Viridiplantae,3GF0X@35493|Streptophyta,3KQ80@4447|Liliopsida	35493|Streptophyta	O	assists the folding of proteins upon ATP hydrolysis	-	GO:0003674,GO:0005488,GO:0005515,GO:0005575,GO:0005622,GO:0005623,GO:0005737,GO:0005829,GO:0005832,GO:0005911,GO:0006457,GO:0006458,GO:0008150,GO:0009506,GO:0009987,GO:0016020,GO:0030054,GO:0032879,GO:0032991,GO:0044183,GO:0044424,GO:0044444,GO:0044445,GO:0044464,GO:0048518,GO:0050789,GO:0051049,GO:0051050,GO:0051082,GO:0055044,GO:0061077,GO:0065007,GO:0101031	-	ko:K09500	-	-	-	-	ko00000,ko03036,ko03110	-	-	Cpn60_TCP1
Ssa01000696.t1	3827.XP_004493152.1	0	1215	KOG1164@1|root,KOG1164@2759|Eukaryota,37SI9@33090|Viridiplantae,3GB04@35493|Streptophyta,4JK8M@91835|fabids	35493|Streptophyta	T	Protein kinase domain	-	GO:0003674,GO:0003824,GO:0004672,GO:0005575,GO:0005622,GO:0005623,GO:0005634,GO:0006464,GO:0006468,GO:0006793,GO:0006796,GO:0006807,GO:0007623,GO:0008150,GO:0008152,GO:0009893,GO:0009894,GO:0009896,GO:0009987,GO:0010468,GO:0010604,GO:0016301,GO:0016310,GO:0016740,GO:0016772,GO:0016773,GO:0019222,GO:0019538,GO:0030162,GO:0031323,GO:0031325,GO:0031329,GO:0031331,GO:0032268,GO:0032270,GO:0032434,GO:…	-	-	-	-	-	-	-	-	-	Pkinase
Ssa01000697.t1	3827.XP_004493157.1	8.84e-285	779	COG0334@1|root,KOG2250@2759|Eukaryota,37Q3I@33090|Viridiplantae,3G8ZE@35493|Streptophyta,4JJHB@91835|fabids	35493|Streptophyta	E	Belongs to the Glu Leu Phe Val dehydrogenases family	GDH1	GO:0000166,GO:0003674,GO:0003824,GO:0004353,GO:0005488,GO:0005507,GO:0005524,GO:0005575,GO:0005622,GO:0005623,GO:0005737,GO:0005739,GO:0006807,GO:0006950,GO:0006970,GO:0006995,GO:0007154,GO:0008144,GO:0008150,GO:0008152,GO:0008270,GO:0009267,GO:0009314,GO:0009416,GO:0009605,GO:0009628,GO:0009642,GO:0009646,GO:0009651,GO:0009987,GO:0009991,GO:0010035,GO:0010038,GO:0016491,GO:0016638,GO:0016639,GO:…	1.4.1.3	ko:K00261	ko00220,ko00250,ko00471,ko00910,ko01100,ko01200,ko04217,ko04964,map00220,map00250,map00471,map00910,map01100,map01200,map04217,map04964	M00740	R00243,R00248	RC00006,RC02799	ko00000,ko00001,ko00002,ko01000,ko04147	-	-	ELFV_dehydrog,ELFV_dehydrog_N
Ssa01000698.t1	3880.AES75184	1.27e-43	143	2CJ2B@1|root,2S81K@2759|Eukaryota,37WVC@33090|Viridiplantae,3GM6N@35493|Streptophyta,4JQXK@91835|fabids	35493|Streptophyta	-	-	-	-	-	-	-	-	-	-	-	-	-	-
Ssa01000699.t1	3885.XP_007161943.1	2.23e-138	400	COG0484@1|root,KOG0715@2759|Eukaryota,37M4R@33090|Viridiplantae,3GG31@35493|Streptophyta,4JD9C@91835|fabids	35493|Streptophyta	O	DnaJ molecular chaperone homology domain	-	-	-	-	-	-	-	-	-	-	-	DnaJ
Ssa01000700.t1	3885.XP_007161949.1	5.64e-114	331	29903@1|root,2RG1H@2759|Eukaryota,37T0D@33090|Viridiplantae,3GAK0@35493|Streptophyta,4JSK2@91835|fabids	35493|Streptophyta	S	Protein of unknown function (DUF1639)	-	-	-	-	-	-	-	-	-	-	-	DUF1639
Ssa01000702.t1	3885.XP_007151850.1	3.28e-91	278	2A8B9@1|root,2RYG5@2759|Eukaryota,37U1N@33090|Viridiplantae,3GJ63@35493|Streptophyta,4JPJB@91835|fabids	35493|Streptophyta	-	-	-	-	-	-	-	-	-	-	-	-	-	-
Ssa01000703.t1	3827.XP_004489697.1	3.91e-118	348	KOG2640@1|root,KOG2640@2759|Eukaryota,37JYA@33090|Viridiplantae,3GBBP@35493|Streptophyta,4JM81@91835|fabids	35493|Streptophyta	S	5-adenylylsulfate reductase-like	APRL5	GO:0003674,GO:0003756,GO:0003824,GO:0005575,GO:0005622,GO:0005623,GO:0005737,GO:0005783,GO:0006457,GO:0006950,GO:0008150,GO:0009987,GO:0012505,GO:0016853,GO:0016860,GO:0016864,GO:0033554,GO:0034976,GO:0043226,GO:0043227,GO:0043229,GO:0043231,GO:0044424,GO:0044444,GO:0044464,GO:0050896,GO:0051716,GO:0140096	-	-	-	-	-	-	-	-	-	Thioredoxin
Ssa01000704.t1	29730.Gorai.013G115200.1	3.05e-139	397	COG5053@1|root,KOG1669@2759|Eukaryota,37KVB@33090|Viridiplantae,3GGRQ@35493|Streptophyta	35493|Streptophyta	J	Belongs to the eukaryotic initiation factor 4E family	-	GO:0005575,GO:0005622,GO:0005623,GO:0005737,GO:0005829,GO:0044424,GO:0044444,GO:0044464	-	ko:K03259	ko01521,ko03013,ko04066,ko04150,ko04151,ko04211,ko04910,map01521,map03013,map04066,map04150,map04151,map04211,map04910	M00428	-	-	ko00000,ko00001,ko00002,ko03012,ko03019	-	-	IF4E
Ssa01000705.t1	29730.Gorai.013G244600.1	0	874	COG5023@1|root,KOG1376@2759|Eukaryota,37NA5@33090|Viridiplantae,3G7Z6@35493|Streptophyta	35493|Streptophyta	Z	Tubulin is the major constituent of microtubules. It binds two moles of GTP, one at an exchangeable site on the beta chain and one at a non-exchangeable site on the alpha chain	-	GO:0005575,GO:0005622,GO:0005623,GO:0005856,GO:0043226,GO:0043228,GO:0043229,GO:0043232,GO:0044424,GO:0044464	-	ko:K07374	ko04145,ko04210,ko04530,ko04540,ko05130,map04145,map04210,map04530,map04540,map05130	-	-	-	ko00000,ko00001,ko03019,ko03036,ko04147,ko04812	-	-	Tubulin,Tubulin_C
Ssa01000706.t1	3885.XP_007161956.1	4.88e-120	352	28K7Q@1|root,2QSNC@2759|Eukaryota,37TGT@33090|Viridiplantae,3GATI@35493|Streptophyta,4JK7G@91835|fabids	35493|Streptophyta	K	ethylene-responsive transcription factor	-	GO:0000302,GO:0003674,GO:0003676,GO:0003677,GO:0003700,GO:0005488,GO:0005575,GO:0005622,GO:0005623,GO:0005634,GO:0006355,GO:0006950,GO:0006979,GO:0007275,GO:0008150,GO:0009719,GO:0009723,GO:0009725,GO:0009791,GO:0009877,GO:0009889,GO:0009891,GO:0009893,GO:0009987,GO:0010033,GO:0010035,GO:0010038,GO:0010468,GO:0010556,GO:0010557,GO:0010604,GO:0010628,GO:0019219,GO:0019222,GO:0022622,GO:0031323,GO:…	-	ko:K09286	-	-	-	-	ko00000,ko03000	-	-	AP2
Ssa01000707.t1	3694.POPTR_0013s05310.1	2.86e-91	280	COG5147@1|root,KOG0048@2759|Eukaryota,37IND@33090|Viridiplantae,3GC5H@35493|Streptophyta,4JRDQ@91835|fabids	35493|Streptophyta	K	transcription repressor	-	GO:0000003,GO:0000902,GO:0000904,GO:0000981,GO:0000988,GO:0000989,GO:0001067,GO:0001076,GO:0001134,GO:0001135,GO:0003006,GO:0003674,GO:0003676,GO:0003677,GO:0003700,GO:0005488,GO:0005575,GO:0005622,GO:0005623,GO:0005634,GO:0006355,GO:0006357,GO:0007275,GO:0008150,GO:0008152,GO:0009058,GO:0009653,GO:0009791,GO:0009888,GO:0009889,GO:0009987,GO:0010026,GO:0010090,GO:0010154,GO:0010191,GO:0010192,GO:…	-	ko:K09422	-	-	-	-	ko00000,ko03000	-	-	Myb_DNA-binding
[truncated: 29,619 more rows]

## Sheet: BUSCO evaluation
# BUSCO version is: 5.7.1
# The lineage dataset is: embryophyta_odb10 (Creation date: 2024-01-08, number of genomes: 50, number of BUSCOs: 1614)
[truncated: 14 more rows]

## Sheet: Telomere detection
# Telomere repeat monomer: AAACCCT
[truncated: 17 more rows]

## Sheet: Centromere localization
#Chr	Start	End	Length
[truncated: 13 more rows]
