# Supplementary material for: A telomere-to-telomere genome of raintree (Samanea Saman) reveals its ecological adaptation characteristics of nyctinastic movement and symbiotic nitrogen fixation
Source: Research Square preprint supplement (doi:10.21203/rs.3.rs-7165529/v1), 2025-08-13
Supplement: Supplementary file 3 [file 34d91cdb6d0dc4f14691ed08.xlsx]

## Sheet: Megagenomic assembly result
Assembly	multi.contigs
# contigs (>= 1000 bp)	4813
# contigs (>= 5000 bp)	192
# contigs (>= 10000 bp)	123
# contigs (>= 25000 bp)	63
# contigs (>= 50000 bp)	41
Total length (>= 1000 bp)	16936289
Total length (>= 5000 bp)	10086276
Total length (>= 10000 bp)	9613692
Total length (>= 25000 bp)	8678116
Total length (>= 50000 bp)	7913611
# contigs	4813
Largest contig	685633
Total length	16936289
GC (%)	63.33
N50	32610
N90	1180
auN	143223
L50	56
L90	3247
# N's per 100 kbp	0

## Sheet: MetaBAT2 clustering evaluation
------------------------------------------------------------------------------------------------------------------------------------------------------------------
Bin Id Marker lineage # genomes # markers # marker sets 0 1 2 3 4 5+ Completeness Contamination Strain heterogeneity
------------------------------------------------------------------------------------------------------------------------------------------------------------------
bin.2 g__Bradyrhizobium (UID3699) 37 824 336 11 811 2 0 0 0 97.51 0.17 0.00
bin.3 k__Bacteria (UID203) 5449 103 58 91 12 0 0 0 0 8.15 0.00 0.00
bin.1 k__Bacteria (UID203) 5449 102 58 97 4 1 0 0 0 2.35 0.16 100.00
bin.5 root (UID1) 5656 56 24 56 0 0 0 0 0 0.00 0.00 0.00
bin.4 root (UID1) 5656 56 24 56 0 0 0 0 0 0.00 0.00 0.00
------------------------------------------------------------------------------------------------------------------------------------------------------------------
item	Value	description
Bin Id	bin.2	Genome ID
Marker lineage	G__Bradyrhizobium (UID3699)	基因组所属的谱系（此处为 Bradyrhizobium 属，CheckM数据库中的唯一标识）。
# genomes	37	CheckM数据库中该谱系的参考基因组数量。
# markers	824	该谱系的单拷贝标记基因（marker genes）总数。
# marker sets	336	标记基因的集合数（用于多维度评估）。
0-5+	11 811 2 0 0 0	标记基因的拷贝数分布：
		• 811个基因是单拷贝（1）
		• 2个基因是双拷贝（2）
		• 11个基因缺失（0）
Completeness	0.9751	基因组完整性：97.51%的单拷贝标记基因被检测到，表明组装高度完整。
Contamination	0.0017	污染率：仅0.17%的标记基因存在多拷贝，说明样本几乎无外源DNA污染。
Strain heterogeneity	0	菌株异质性：0%表明基因组来自单一菌株（无混合菌株信号）。

## Sheet: Paramaters of B.saman genome
Assembly	Genome of Bradyrhizobium saman
# contigs (>= 1000 bp)	50
# contigs (>= 5000 bp)	48
# contigs (>= 10000 bp)	44
# contigs (>= 25000 bp)	38
# contigs (>= 50000 bp)	34
Total length (>= 1000 bp)	7278569
Total length (>= 5000 bp)	7272624
Total length (>= 10000 bp)	7250458
Total length (>= 25000 bp)	7144352
Total length (>= 50000 bp)	6992861
# contigs	50
Largest contig	685633
Total length	7278569
GC (%)	64.63
N50	309524
N90	84293
auN	304075
L50	9
L90	28
# N's per 100 kbp	0

## Sheet: Assembly index of B. saman
Organism: Bradyrhizobium saman			Description
contigs: 50	Contigs	50	The assembly is good continuity (bacterial genome contigs of less than 100 are generally considered to be relatively complete)
bases: 7278569	Total length	7,278,569 bp	The genome size is approximately 7.28 Mb, belonging to the typical slow-growing rhizobacteria range (Bradyrhizobium genome typically ranges from 7 to 9 Mb)
CDS: 6827	CDS	6827	Normal (slow-growing rhizobacteria have approximately 6,000 to 8,000 genes)
gene: 6882	gene	6882	All predicted genes in the genome (including coding and non-coding genes) = CDS + non-coding RNA genes + pseudogenes
mRNA: 6882	mRNA	6882	The same number as the gene count indicates that each gene corresponds to one transcript (in prokaryotes, typically 1 gene = 1 mRNA) If it is a eukaryote, mRNA may be greater than the number of genes due to alternative splicing
rRNA: 3	rRNA	3	A complete genome should have 5-6 (1-2 operons)
tRNA: 51	tRNA	51	A typical bacterial genome should have 45-60
tmRNA: 1	tmRNA	1	Normal (in bacteria, usually 1)
															指标	数值	生物学意义
															Contigs数量	50	组装连续性较好（一般细菌基因组contigs数<100视为较完整）
															总长度	7,278,569 bp	基因组大小约7.28 Mb，属于典型慢生根瘤菌范围（Bradyrhizobium通常7-9 Mb）
															GC含量	0.6463	高GC含量，符合大多数慢生根瘤菌特征（参考：B. japonicum GC≈64.2%）
															2. 基因注释质量评估
															注释类型	数量	预期范围	潜在问题
															CDS	6827	正常（慢生根瘤菌约6,000-8,000基因）	-
															tRNA	51	典型细菌基因组应有45-60个	数量正常，但需检查是否包含所有必需tRNA类型
															rRNA	3	完整基因组应有5-6个（1-2个操纵子）	可能组装不全（rRNA操纵子易丢失）
															tmRNA	1	正常（细菌通常1个）	-

## Sheet: Annotation of genes
Annotated genes in genome of rhizobium B.saman
query	seed_ortholog	evalue	score	eggNOG_OGs	max_annot_lvl	COG_category	Description	Preferred_name	GOs	EC	KEGG_ko	KEGG_Pathway	KEGG_Module	KEGG_Reaction	KEGG_rclass	BRITE	KEGG_TC	CAZy	PFAMs
RA01000001.1	1038866.KB902768_gene5065	2.15e-95	284.0	COG3622@1|root,COG3622@2|Bacteria,1MV53@1224|Proteobacteria,2TSVI@28211|Alphaproteobacteria,3JUFW@41294|Bradyrhizobiaceae	28211|Alphaproteobacteria	G	Xylose isomerase-like TIM barrel	hyi	-	5.3.1.22	ko:K01816	ko00630,ko01100,map00630,map01100	-	R01394	RC00511	ko00000,ko00001,ko01000	-	-	AP_endonuc_2
RA01000002.1	1038862.KB893884_gene670	0.0	1156.0	COG3960@1|root,COG3960@2|Bacteria,1MV88@1224|Proteobacteria,2TQTW@28211|Alphaproteobacteria,3JRG6@41294|Bradyrhizobiaceae	28211|Alphaproteobacteria	S	Thiamine pyrophosphate enzyme, central domain	gcl	-	4.1.1.47	ko:K01608	ko00630,ko01100,map00630,map01100	-	R00013	RC00899	ko00000,ko00001,ko01000	-	-	TPP_enzyme_C,TPP_enzyme_M,TPP_enzyme_N
RA01000003.1	1038862.KB893884_gene671	0.0	1152.0	COG1001@1|root,COG1001@2|Bacteria,1MVFP@1224|Proteobacteria,2TR1X@28211|Alphaproteobacteria,3JSNF@41294|Bradyrhizobiaceae	28211|Alphaproteobacteria	F	purine nucleobase catabolic process	ade	GO:0003674,GO:0003824,GO:0006040,GO:0006044,GO:0006046,GO:0008150,GO:0008152,GO:0008448,GO:0009056,GO:0016787,GO:0016810,GO:0016811,GO:0019213,GO:0046348,GO:0071704,GO:1901071,GO:1901072,GO:1901135,GO:1901136,GO:1901575	3.5.4.2	ko:K01486	ko00230,ko01100,map00230,map01100	-	R01244	RC00477	ko00000,ko00001,ko01000	-	-	Adenine_deam_C,Amidohydro_1
RA01000004.1	936455.KI421499_gene4092	3.52e-178	497.0	COG1432@1|root,COG1432@2|Bacteria,1MX5C@1224|Proteobacteria,2TRE6@28211|Alphaproteobacteria,3JT11@41294|Bradyrhizobiaceae	28211|Alphaproteobacteria	S	OST-HTH/LOTUS domain	MA20_15040	-	-	-	-	-	-	-	-	-	-	NYN,OST-HTH
RA01000005.1	1038862.KB893884_gene673	4.66e-196	544.0	COG0583@1|root,COG0583@2|Bacteria,1PR6U@1224|Proteobacteria,2TUC6@28211|Alphaproteobacteria,3JZ5F@41294|Bradyrhizobiaceae	28211|Alphaproteobacteria	K	Bacterial regulatory helix-turn-helix protein, lysR family	yofA	-	-	-	-	-	-	-	-	-	-	HTH_1,LysR_substrate
RA01000006.1	1038862.KB893884_gene674	1.33e-106	311.0	COG1280@1|root,COG1280@2|Bacteria,1RFU5@1224|Proteobacteria,2V828@28211|Alphaproteobacteria,3K22D@41294|Bradyrhizobiaceae	28211|Alphaproteobacteria	E	LysE type translocator	-	-	-	-	-	-	-	-	-	-	-	LysE
RA01000007.1	936455.KI421499_gene4093	0.0	942.0	COG3333@1|root,COG3333@2|Bacteria,1MUKR@1224|Proteobacteria,2TR4Q@28211|Alphaproteobacteria,3JRAZ@41294|Bradyrhizobiaceae	28211|Alphaproteobacteria	S	Tripartite tricarboxylate transporter TctA family	MA20_15045	-	-	ko:K07793	ko02020,map02020	-	-	-	ko00000,ko00001,ko02000	2.A.80.1	-	TctA
RA01000008.1	1038866.KB902768_gene5060	2.74e-95	279.0	2C846@1|root,32T61@2|Bacteria,1RCJG@1224|Proteobacteria,2U6NF@28211|Alphaproteobacteria,3JYC8@41294|Bradyrhizobiaceae	28211|Alphaproteobacteria	S	Tripartite tricarboxylate transporter TctB family	-	-	-	ko:K07794	ko02020,map02020	-	-	-	ko00000,ko00001,ko02000	2.A.80.1	-	TctB
RA01000009.1	1037409.BJ6T_65970	9.81e-212	587.0	COG3181@1|root,COG3181@2|Bacteria,1MXEX@1224|Proteobacteria,2TTSX@28211|Alphaproteobacteria,3JR0A@41294|Bradyrhizobiaceae	28211|Alphaproteobacteria	S	Tripartite tricarboxylate transporter family receptor	MA20_15055	-	-	ko:K07795	ko02020,map02020	-	-	-	ko00000,ko00001,ko02000	2.A.80.1	-	TctC
RA01000010.1	1037409.BJ6T_65980	8.32e-180	503.0	COG1414@1|root,COG1414@2|Bacteria,1MUNW@1224|Proteobacteria,2TSY8@28211|Alphaproteobacteria,3JTIU@41294|Bradyrhizobiaceae	28211|Alphaproteobacteria	K	helix_turn_helix isocitrate lyase regulation	MA20_15060	-	-	ko:K13641	-	-	-	-	ko00000,ko03000	-	-	HTH_IclR,IclR
RA01000011.1	936455.KI421499_gene4097	0.0	1362.0	COG0045@1|root,COG1042@1|root,COG0045@2|Bacteria,COG1042@2|Bacteria,1MW98@1224|Proteobacteria,2TQYI@28211|Alphaproteobacteria,3JU7U@41294|Bradyrhizobiaceae	28211|Alphaproteobacteria	C	CoA binding domain	MA20_15065	-	-	-	-	-	-	-	-	-	-	ATP-grasp_5,CoA_binding_2,Succ_CoA_lig
RA01000012.1	224911.27351416	3.71e-166	466.0	COG1802@1|root,COG1802@2|Bacteria,1MXNF@1224|Proteobacteria,2U1PK@28211|Alphaproteobacteria,3JUTC@41294|Bradyrhizobiaceae	28211|Alphaproteobacteria	K	FCD	MA20_15070	-	-	-	-	-	-	-	-	-	-	FCD,GntR
RA01000013.1	318996.AXAZ01000004_gene6105	0.0	1134.0	COG0028@1|root,COG0028@2|Bacteria,1MXDW@1224|Proteobacteria,2TT9X@28211|Alphaproteobacteria,3JRKI@41294|Bradyrhizobiaceae	28211|Alphaproteobacteria	EH	Belongs to the TPP enzyme family	oxc	-	2.2.1.6,4.1.1.8	ko:K01577,ko:K01652	ko00290,ko00630,ko00650,ko00660,ko00770,ko01100,ko01110,ko01130,ko01210,ko01230,map00290,map00630,map00650,map00660,map00770,map01100,map01110,map01130,map01210,map01230	M00019,M00570	R00006,R00014,R00226,R01908,R03050,R04672,R04673,R08648	RC00027,RC00106,RC00620,RC01192,RC02744,RC02893	ko00000,ko00001,ko00002,ko01000	-	-	TPP_enzyme_C,TPP_enzyme_M,TPP_enzyme_N
RA01000014.1	224911.27351414	0.0	867.0	COG1804@1|root,COG1804@2|Bacteria,1MU2K@1224|Proteobacteria,2TTM5@28211|Alphaproteobacteria,3JR50@41294|Bradyrhizobiaceae	28211|Alphaproteobacteria	C	Involved in the catabolism of oxalate and in the adapatation to low pH via the induction of the oxalate-dependent acid tolerance response (ATR). Catalyzes the transfer of the CoA moiety from formyl-CoA to oxalate	frc	-	2.8.3.16	ko:K07749	-	-	-	-	ko00000,ko01000	-	-	CoA_transf_3
RA01000015.1	1037409.BJ6T_49580	4.26e-99	304.0	COG0412@1|root,COG0412@2|Bacteria,1PKGT@1224|Proteobacteria,2U0KI@28211|Alphaproteobacteria,3JX6Q@41294|Bradyrhizobiaceae	28211|Alphaproteobacteria	Q	Dienelactone hydrolase	-	-	-	-	-	-	-	-	-	-	-	Hydrolase_4
RA01000016.1	1037409.BJ6T_66040	1.8e-26	97.8	2DIBP@1|root,302NV@2|Bacteria,1NDRV@1224|Proteobacteria,2UHII@28211|Alphaproteobacteria,3K19Q@41294|Bradyrhizobiaceae	28211|Alphaproteobacteria	-	-	-	-	-	-	-	-	-	-	-	-	-	-
RA01000017.1	224911.27351413	5.18e-38	127.0	2AB7B@1|root,310MR@2|Bacteria,1MZUB@1224|Proteobacteria,2UDTJ@28211|Alphaproteobacteria,3K091@41294|Bradyrhizobiaceae	28211|Alphaproteobacteria	-	-	-	-	-	-	-	-	-	-	-	-	-	-
RA01000018.1	335659.S23_48450	3.62e-28	103.0	2AGVZ@1|root,3174D@2|Bacteria,1NJ2N@1224|Proteobacteria,2UK1X@28211|Alphaproteobacteria,3K1UQ@41294|Bradyrhizobiaceae	28211|Alphaproteobacteria	-	-	-	-	-	-	-	-	-	-	-	-	-	-
RA01000019.1	1304877.KI519400_gene786	3.73e-45	147.0	COG1278@1|root,COG1278@2|Bacteria,1N6Q5@1224|Proteobacteria,2UF6W@28211|Alphaproteobacteria,3K04N@41294|Bradyrhizobiaceae	28211|Alphaproteobacteria	K	Cold shock protein domain	-	-	-	ko:K03704	-	-	-	-	ko00000,ko03000	-	-	CSD
RA01000020.1	224911.27353257	5.72e-144	409.0	COG2519@1|root,COG2519@2|Bacteria,1QWSF@1224|Proteobacteria,2TX3V@28211|Alphaproteobacteria,3JWB7@41294|Bradyrhizobiaceae	28211|Alphaproteobacteria	J	Protein-L-isoaspartate(D-aspartate) O-methyltransferase (PCMT)	-	-	-	-	-	-	-	-	-	-	-	Methyltransf_25,PCMT
RA01000021.1	1037409.BJ6T_20840	7.55e-87	263.0	COG1514@1|root,COG1514@2|Bacteria,1RF2Z@1224|Proteobacteria,2U8SN@28211|Alphaproteobacteria,3JZ35@41294|Bradyrhizobiaceae	28211|Alphaproteobacteria	J	2'-5' RNA ligase superfamily	-	-	-	-	-	-	-	-	-	-	-	2_5_RNA_ligase2
RA01000022.1	319003.Bra1253DRAFT_02455	8.47e-85	251.0	2BTR2@1|root,32NY8@2|Bacteria,1REBA@1224|Proteobacteria,2U753@28211|Alphaproteobacteria,3JZBI@41294|Bradyrhizobiaceae	28211|Alphaproteobacteria	-	-	-	-	-	-	-	-	-	-	-	-	-	-
RA01000023.1	1038866.KB902775_gene5325	3.81e-126	363.0	292K4@1|root,2ZQ42@2|Bacteria,1R8HA@1224|Proteobacteria,2U47G@28211|Alphaproteobacteria,3JXAR@41294|Bradyrhizobiaceae	28211|Alphaproteobacteria	-	-	-	-	-	-	-	-	-	-	-	-	-	-
RA01000027.1	443598.AUFA01000033_gene6253	4.02e-165	469.0	COG4188@1|root,COG4188@2|Bacteria,1MW2N@1224|Proteobacteria,2U54T@28211|Alphaproteobacteria,3JSGT@41294|Bradyrhizobiaceae	28211|Alphaproteobacteria	S	dienelactone hydrolase	-	-	-	-	-	-	-	-	-	-	-	DLH,Hydrolase_4,PAF-AH_p_II,Peptidase_S9
RA01000028.1	1038866.KB902768_gene5051	1.69e-138	394.0	2DMMM@1|root,32SHA@2|Bacteria,1N257@1224|Proteobacteria,2TRFF@28211|Alphaproteobacteria,3JVIR@41294|Bradyrhizobiaceae	28211|Alphaproteobacteria	-	-	-	-	-	-	-	-	-	-	-	-	-	-
RA01000030.1	1038867.AXAY01000007_gene6008	1.41e-48	155.0	COG3655@1|root,COG3655@2|Bacteria,1N6VH@1224|Proteobacteria,2UFAM@28211|Alphaproteobacteria,3K0KB@41294|Bradyrhizobiaceae	28211|Alphaproteobacteria	K	Cro/C1-type HTH DNA-binding domain	-	-	-	ko:K07727	-	-	-	-	ko00000,ko03000	-	-	HTH_26
RA01000031.1	936455.KI421499_gene4114	1.03e-119	343.0	2A4UW@1|root,30TGF@2|Bacteria,1MWS4@1224|Proteobacteria,2U0IF@28211|Alphaproteobacteria,3JXUP@41294|Bradyrhizobiaceae	28211|Alphaproteobacteria	S	Protein of unknown function (DUF2975)	-	-	-	-	-	-	-	-	-	-	-	DUF2975
RA01000032.1	936455.KI421499_gene4115	4.59e-93	272.0	COG4731@1|root,COG4731@2|Bacteria,1N7E7@1224|Proteobacteria,2UHSI@28211|Alphaproteobacteria,3JX9P@41294|Bradyrhizobiaceae	28211|Alphaproteobacteria	S	Uncharacterized protein conserved in bacteria (DUF2147)	-	-	-	-	-	-	-	-	-	-	-	DUF2147
RA01000033.1	1037409.BJ6T_66060	7.61e-102	295.0	COG3832@1|root,COG3832@2|Bacteria,1RCZK@1224|Proteobacteria,2TV1V@28211|Alphaproteobacteria,3JUK6@41294|Bradyrhizobiaceae	28211|Alphaproteobacteria	S	Activator of Hsp90 ATPase homolog 1-like protein	MA20_15105	-	-	-	-	-	-	-	-	-	-	AHSA1
RA01000034.1	319003.Bra1253DRAFT_01998	7.59e-310	846.0	COG0443@1|root,COG0443@2|Bacteria,1MXBT@1224|Proteobacteria,2TS1I@28211|Alphaproteobacteria,3JS0W@41294|Bradyrhizobiaceae	28211|Alphaproteobacteria	O	Hsp70 protein	MA20_15110	-	-	ko:K04046	-	-	-	-	ko00000,ko03110	1.A.33	-	HSP70
RA01000035.1	318996.AXAZ01000008_gene4139	2.96e-21	83.6	2AGCQ@1|root,316ID@2|Bacteria,1NHTS@1224|Proteobacteria,2UJQD@28211|Alphaproteobacteria,3K1QA@41294|Bradyrhizobiaceae	28211|Alphaproteobacteria	-	-	-	-	-	-	-	-	-	-	-	-	-	-
RA01000036.1	1037409.BJ6T_66090	3.86e-236	650.0	COG3181@1|root,COG3181@2|Bacteria,1MXEX@1224|Proteobacteria,2TT5Y@28211|Alphaproteobacteria,3JT2E@41294|Bradyrhizobiaceae	28211|Alphaproteobacteria	S	Tripartite tricarboxylate transporter family receptor	MA20_15115	-	-	ko:K07795	ko02020,map02020	-	-	-	ko00000,ko00001,ko02000	2.A.80.1	-	TctC
RA01000037.1	1037409.BJ6T_66100	4.94e-109	314.0	2BKYI@1|root,32FF5@2|Bacteria,1RB6X@1224|Proteobacteria,2VER9@28211|Alphaproteobacteria,3JY0I@41294|Bradyrhizobiaceae	28211|Alphaproteobacteria	S	Tripartite tricarboxylate transporter TctB family	MA20_15120	-	-	-	-	-	-	-	-	-	-	TctB
RA01000038.1	1126627.BAWE01000004_gene3297	0.0	951.0	COG3333@1|root,COG3333@2|Bacteria,1MUKR@1224|Proteobacteria,2TR4Q@28211|Alphaproteobacteria,3JVYZ@41294|Bradyrhizobiaceae	28211|Alphaproteobacteria	S	Tripartite tricarboxylate transporter TctA family	MA20_15125	-	-	ko:K07793	ko02020,map02020	-	-	-	ko00000,ko00001,ko02000	2.A.80.1	-	TctA
RA01000039.1	1038866.KB902768_gene5044	3.12e-307	837.0	COG2223@1|root,COG2223@2|Bacteria,1MVFQ@1224|Proteobacteria,2TR8Q@28211|Alphaproteobacteria,3JTQJ@41294|Bradyrhizobiaceae	28211|Alphaproteobacteria	P	Major Facilitator Superfamily	MA20_15130	-	-	ko:K08177	-	-	-	-	ko00000,ko02000	2.A.1.11	-	MFS_1
RA01000040.1	318996.AXAZ01000008_gene4144	8.45e-300	820.0	COG2271@1|root,COG2271@2|Bacteria,1QW8U@1224|Proteobacteria,2TWTA@28211|Alphaproteobacteria,3K6P3@41294|Bradyrhizobiaceae	28211|Alphaproteobacteria	G	Major Facilitator Superfamily	MA20_15135	-	-	ko:K08177	-	-	-	-	ko00000,ko02000	2.A.1.11	-	MFS_1
RA01000041.1	936455.KI421499_gene4121	3.64e-86	254.0	COG0517@1|root,COG0517@2|Bacteria,1RBR8@1224|Proteobacteria,2U5SN@28211|Alphaproteobacteria,3JYA9@41294|Bradyrhizobiaceae	28211|Alphaproteobacteria	S	Domain in cystathionine beta-synthase and other proteins.	MA20_15140	-	-	-	-	-	-	-	-	-	-	CBS
RA01000042.1	1038866.KB902768_gene5041	2.96e-242	665.0	COG1893@1|root,COG1893@2|Bacteria,1MVZ1@1224|Proteobacteria,2TRJN@28211|Alphaproteobacteria,3JQQC@41294|Bradyrhizobiaceae	28211|Alphaproteobacteria	H	Ketopantoate reductase PanE/ApbA C terminal	panE	-	1.1.1.169	ko:K00077	ko00770,ko01100,ko01110,map00770,map01100,map01110	M00119	R02472	RC00726	ko00000,ko00001,ko00002,ko01000	-	-	ApbA,ApbA_C
RA01000043.1	1038862.KB893884_gene701	3.52e-179	499.0	COG0179@1|root,COG0179@2|Bacteria,1QUQP@1224|Proteobacteria,2TWGE@28211|Alphaproteobacteria,3JR43@41294|Bradyrhizobiaceae	28211|Alphaproteobacteria	Q	Domain of unknown function (DUF2437)	MA20_15150	-	-	-	-	-	-	-	-	-	-	DUF2437,FAA_hydrolase
RA01000044.1	1037409.BJ6T_66170	5.28e-16	70.5	2AIB1@1|root,318S0@2|Bacteria,1NPVC@1224|Proteobacteria,2UMWP@28211|Alphaproteobacteria,3K213@41294|Bradyrhizobiaceae	28211|Alphaproteobacteria	-	-	-	-	-	-	-	-	-	-	-	-	-	-
RA01000045.1	319003.Bra1253DRAFT_02005	1.34e-278	768.0	COG0419@1|root,COG0419@2|Bacteria,1PIP1@1224|Proteobacteria,2TUY8@28211|Alphaproteobacteria,3JTZR@41294|Bradyrhizobiaceae	28211|Alphaproteobacteria	L	ATPase involved in DNA repair	-	-	-	-	-	-	-	-	-	-	-	-
RA01000046.1	1038862.KB893884_gene703	1.49e-19	80.9	2BXZI@1|root,3024C@2|Bacteria,1NB9N@1224|Proteobacteria,2UI89@28211|Alphaproteobacteria,3K103@41294|Bradyrhizobiaceae	28211|Alphaproteobacteria	-	-	MA20_15170	-	-	-	-	-	-	-	-	-	-	-
RA01000047.1	318996.AXAZ01000008_gene4149	1.31e-135	384.0	2B9G4@1|root,322U3@2|Bacteria,1P0JW@1224|Proteobacteria,2UEFE@28211|Alphaproteobacteria,3JRDB@41294|Bradyrhizobiaceae	28211|Alphaproteobacteria	-	-	-	-	-	-	-	-	-	-	-	-	-	-
RA01000048.1	936455.KI421499_gene4128	5.02e-230	634.0	COG2070@1|root,COG2070@2|Bacteria,1MWPC@1224|Proteobacteria,2TQRT@28211|Alphaproteobacteria,3JQS9@41294|Bradyrhizobiaceae	28211|Alphaproteobacteria	S	Nitronate monooxygenase	MA20_15180	-	1.13.12.16	ko:K00459	ko00910,map00910	-	R00025	RC02541,RC02759	ko00000,ko00001,ko01000	-	-	NMO
RA01000049.1	224911.27351400	2.46e-221	611.0	COG0604@1|root,COG0604@2|Bacteria,1MX8A@1224|Proteobacteria,2TVPQ@28211|Alphaproteobacteria,3JQNY@41294|Bradyrhizobiaceae	28211|Alphaproteobacteria	C	Zinc-binding dehydrogenase	MA20_15185	-	1.6.5.5	ko:K00344	-	-	-	-	ko00000,ko01000	-	-	ADH_N,ADH_zinc_N
RA01000050.1	1038866.KB902768_gene5033	1.92e-300	823.0	COG0053@1|root,COG0053@2|Bacteria,1MUDS@1224|Proteobacteria,2TT78@28211|Alphaproteobacteria,3JQTV@41294|Bradyrhizobiaceae	28211|Alphaproteobacteria	P	Belongs to the cation diffusion facilitator (CDF) transporter (TC 2.A.4) family	MA20_15190	-	-	-	-	-	-	-	-	-	-	Cation_efflux,ZT_dimer
RA01000051.1	1038866.KB902768_gene5032	0.0	1460.0	COG0642@1|root,COG2202@1|root,COG2202@2|Bacteria,COG2205@2|Bacteria,1NRP8@1224|Proteobacteria,2TRHH@28211|Alphaproteobacteria,3JSG2@41294|Bradyrhizobiaceae	28211|Alphaproteobacteria	T	PAS fold	pleC	-	2.7.13.3	ko:K07716	ko02020,ko04112,map02020,map04112	M00511	-	-	ko00000,ko00001,ko00002,ko01000,ko01001,ko02022	-	-	HATPase_c,HisKA,PAS,PAS_3,PAS_7
RA01000052.1	1304878.AUGD01000006_gene6614	2.16e-207	574.0	COG0583@1|root,COG0583@2|Bacteria,1N4P5@1224|Proteobacteria,2TQYX@28211|Alphaproteobacteria,3JS6Y@41294|Bradyrhizobiaceae	28211|Alphaproteobacteria	K	LysR family	QU41_25640	-	-	-	-	-	-	-	-	-	-	HTH_1,LysR_substrate
RA01000053.1	224911.27351396	1.32e-107	310.0	COG1905@1|root,COG1905@2|Bacteria,1RHBU@1224|Proteobacteria,2U72T@28211|Alphaproteobacteria,3JR46@41294|Bradyrhizobiaceae	28211|Alphaproteobacteria	C	Thioredoxin-like [2Fe-2S] ferredoxin	fdsG	-	-	ko:K00127	ko00630,ko00680,ko01100,ko01120,ko01200,map00630,map00680,map01100,map01120,map01200	-	R00519	RC02796	ko00000,ko00001	-	-	2Fe-2S_thioredx
RA01000054.1	1037409.BJ6T_66280	0.0	1006.0	COG1894@1|root,COG1894@2|Bacteria,1MV8F@1224|Proteobacteria,2TR1V@28211|Alphaproteobacteria,3JRTE@41294|Bradyrhizobiaceae	28211|Alphaproteobacteria	C	NADH-ubiquinone oxidoreductase-F iron-sulfur binding region	fdsB	-	1.6.5.3	ko:K00124,ko:K00335	ko00190,ko00630,ko00680,ko01100,ko01120,ko01200,map00190,map00630,map00680,map01100,map01120,map01200	M00144	R00519,R11945	RC00061,RC02796	ko00000,ko00001,ko00002,ko01000	3.D.1	-	Complex1_51K,NADH_4Fe-4S,SLBB
RA01000055.1	443598.AUFA01000002_gene2805	0.0	1893.0	COG3383@1|root,COG3383@2|Bacteria,1QTZB@1224|Proteobacteria,2TVZI@28211|Alphaproteobacteria,3JTEA@41294|Bradyrhizobiaceae	28211|Alphaproteobacteria	C	Formate dehydrogenase, alpha subunit	fdsA	-	1.17.1.9	ko:K00123	ko00630,ko00680,ko01100,ko01120,ko01200,map00630,map00680,map01100,map01120,map01200	-	R00519	RC02796	ko00000,ko00001,ko01000	-	-	Fer2_4,Fer4,Fer4_7,Fer4_9,Molybdop_Fe4S4,Molybdopterin,Molydop_binding,NADH-G_4Fe-4S_3
RA01000056.1	1038862.KB893884_gene713	5.12e-179	500.0	COG1526@1|root,COG1526@2|Bacteria,1NRU0@1224|Proteobacteria,2TUD2@28211|Alphaproteobacteria,3JSY6@41294|Bradyrhizobiaceae	28211|Alphaproteobacteria	C	Required for formate dehydrogenase (FDH) activity. Acts as a sulfur carrier protein that transfers sulfur from IscS to the molybdenum cofactor prior to its insertion into FDH	fdhD	-	-	ko:K02379	-	-	-	-	ko00000	-	-	FdhD-NarQ
RA01000057.1	224911.27351392	5.8e-45	145.0	2E4CR@1|root,32Z86@2|Bacteria,1N7UZ@1224|Proteobacteria,2UF9N@28211|Alphaproteobacteria,3K0B2@41294|Bradyrhizobiaceae	28211|Alphaproteobacteria	S	NADH-dependant formate dehydrogenase delta subunit FdsD	fdsD	-	1.17.1.9	ko:K00126	ko00630,ko00680,ko01100,ko01120,ko01200,map00630,map00680,map01100,map01120,map01200	-	R00519	RC02796	ko00000,ko00001,ko01000	-	-	FdsD
RA01000058.1	318996.AXAZ01000008_gene4160	0.0	1800.0	COG1391@1|root,COG1391@2|Bacteria,1MU4I@1224|Proteobacteria,2TRY7@28211|Alphaproteobacteria,3JR47@41294|Bradyrhizobiaceae	28211|Alphaproteobacteria	H	Involved in the regulation of glutamine synthetase GlnA, a key enzyme in the process to assimilate ammonia. When cellular nitrogen levels are high, the C-terminal adenylyl transferase (AT) inactivates GlnA by covalent transfer of an adenylyl group from ATP to specific tyrosine residue of GlnA, thus reducing its activity. Conversely, when nitrogen levels are low, the N-terminal adenylyl removase (…	glnE	GO:0000820,GO:0003674,GO:0003824,GO:0005575,GO:0005622,GO:0005623,GO:0005737,GO:0005829,GO:0006521,GO:0008150,GO:0008882,GO:0010565,GO:0016740,GO:0016772,GO:0016779,GO:0019222,GO:0031323,GO:0033238,GO:0044424,GO:0044444,GO:0044464,GO:0050789,GO:0050794,GO:0051171,GO:0062012,GO:0065007,GO:0070566,GO:0080090	2.7.7.42,2.7.7.89	ko:K00982	-	-	-	-	ko00000,ko01000	-	-	GlnD_UR_UTase,GlnE
RA01000059.1	1038862.KB893884_gene716	0.0	879.0	COG0642@1|root,COG0642@2|Bacteria,1QTVA@1224|Proteobacteria,2U5EI@28211|Alphaproteobacteria,3JRC5@41294|Bradyrhizobiaceae	28211|Alphaproteobacteria	T	HAMP (Histidine kinases, Adenylyl cyclases, Methyl binding proteins, Phosphatases) domain	MA20_15235	-	-	-	-	-	-	-	-	-	-	HAMP,HATPase_c,HisKA
RA01000060.1	936455.KI421499_gene4140	6.83e-166	464.0	COG0745@1|root,COG0745@2|Bacteria,1MU67@1224|Proteobacteria,2TRTZ@28211|Alphaproteobacteria,3JT22@41294|Bradyrhizobiaceae	28211|Alphaproteobacteria	T	transcriptional regulator, winged helix family	ragA	GO:0000160,GO:0003674,GO:0003676,GO:0003677,GO:0005488,GO:0005515,GO:0006355,GO:0007154,GO:0007165,GO:0008150,GO:0009889,GO:0009893,GO:0009987,GO:0010035,GO:0010038,GO:0010468,GO:0010556,GO:0010604,GO:0010628,GO:0019219,GO:0019222,GO:0023052,GO:0031323,GO:0031326,GO:0035556,GO:0042221,GO:0042802,GO:0046688,GO:0048518,GO:0050789,GO:0050794,GO:0050896,GO:0051171,GO:0051252,GO:0051716,GO:0060255,GO:…	-	ko:K02483	-	-	-	-	ko00000,ko02022	-	-	Response_reg,Trans_reg_C
RA01000061.1	224911.27351388	0.0	971.0	COG0265@1|root,COG0265@2|Bacteria,1MU63@1224|Proteobacteria,2TQPZ@28211|Alphaproteobacteria,3JQQI@41294|Bradyrhizobiaceae	28211|Alphaproteobacteria	O	Belongs to the peptidase S1C family	MA20_15480	-	3.4.21.107	ko:K04771	ko01503,ko02020,map01503,map02020	M00728	-	-	ko00000,ko00001,ko00002,ko01000,ko01002,ko03110	-	-	PDZ_2,Trypsin_2
RA01000062.1	335659.S23_48730	8.86e-162	471.0	COG0840@1|root,COG2770@1|root,COG0840@2|Bacteria,COG2770@2|Bacteria,1QF8N@1224|Proteobacteria,2TTQA@28211|Alphaproteobacteria,3JWSY@41294|Bradyrhizobiaceae	28211|Alphaproteobacteria	NT	Methyl-accepting chemotaxis-like domains (chemotaxis sensory transducer).	MA20_15485	-	-	-	-	-	-	-	-	-	-	MCPsignal
RA01000063.1	936455.KI421499_gene4143	2.01e-99	290.0	COG3088@1|root,COG3088@2|Bacteria,1MZZ5@1224|Proteobacteria,2U96P@28211|Alphaproteobacteria,3JYWC@41294|Bradyrhizobiaceae	28211|Alphaproteobacteria	O	subunit of a heme lyase	cycL	-	-	ko:K02200	-	-	-	-	ko00000	-	-	CcmH
RA01000064.1	1038862.KB893884_gene722	0.0	1256.0	COG1138@1|root,COG1138@2|Bacteria,1MUQS@1224|Proteobacteria,2TRNG@28211|Alphaproteobacteria,3JRX0@41294|Bradyrhizobiaceae	28211|Alphaproteobacteria	O	Cytochrome c-type biogenesis protein	ccmF	-	-	ko:K02198	-	-	-	-	ko00000,ko02000	9.B.14.1	-	CcmF_C,Cytochrom_C_asm
RA01000065.1	936455.KI421499_gene4145	4.12e-106	307.0	COG2332@1|root,COG2332@2|Bacteria,1RHN5@1224|Proteobacteria,2U99J@28211|Alphaproteobacteria,3JYFM@41294|Bradyrhizobiaceae	28211|Alphaproteobacteria	O	Heme chaperone required for the biogenesis of c-type cytochromes. Transiently binds heme delivered by CcmC and transfers the heme to apo-cytochromes in a process facilitated by CcmF and CcmH	ccmE	GO:0003674,GO:0003824,GO:0008150,GO:0009987,GO:0016043,GO:0017004,GO:0022607,GO:0034622,GO:0043933,GO:0044085,GO:0065003,GO:0071840	-	ko:K02197	-	-	-	-	ko00000	-	-	CcmE
RA01000066.1	319003.Bra1253DRAFT_02026	6.14e-238	658.0	COG4235@1|root,COG4235@2|Bacteria,1MY4J@1224|Proteobacteria,2TSI7@28211|Alphaproteobacteria,3JT3X@41294|Bradyrhizobiaceae	28211|Alphaproteobacteria	O	Cytochrome c-type biogenesis protein	cycH	-	-	ko:K02200	-	-	-	-	ko00000	-	-	TPR_16,TPR_19
RA01000067.1	224911.27351382	3.17e-50	160.0	2A14P@1|root,30PAI@2|Bacteria,1RHW7@1224|Proteobacteria,2U9VD@28211|Alphaproteobacteria,3JZDB@41294|Bradyrhizobiaceae	28211|Alphaproteobacteria	-	-	-	-	-	-	-	-	-	-	-	-	-	-
RA01000068.1	224911.27351381	1.77e-308	845.0	28K9G@1|root,2Z9X1@2|Bacteria,1NEMY@1224|Proteobacteria,2U0J7@28211|Alphaproteobacteria,3JSTQ@41294|Bradyrhizobiaceae	28211|Alphaproteobacteria	-	-	MA20_15515	-	-	-	-	-	-	-	-	-	-	-
RA01000069.1	224911.27351380	7.09e-308	842.0	COG0642@1|root,COG0642@2|Bacteria,1MX6R@1224|Proteobacteria,2TS9N@28211|Alphaproteobacteria,3JRDW@41294|Bradyrhizobiaceae	28211|Alphaproteobacteria	T	Histidine kinase	feuQ	-	-	-	-	-	-	-	-	-	-	2CSK_N,HATPase_c
RA01000070.1	224911.27351379	7.45e-160	447.0	COG0745@1|root,COG0745@2|Bacteria,1N0YI@1224|Proteobacteria,2TSV8@28211|Alphaproteobacteria,3JRE8@41294|Bradyrhizobiaceae	28211|Alphaproteobacteria	T	Two component transcriptional regulator, winged helix family	feuP	-	-	ko:K02483	-	-	-	-	ko00000,ko02022	-	-	Response_reg,Trans_reg_C
RA01000071.1	318996.AXAZ01000008_gene4172	1.15e-25	95.1	2AF6B@1|root,31559@2|Bacteria,1NCNB@1224|Proteobacteria,2UFFV@28211|Alphaproteobacteria,3K13P@41294|Bradyrhizobiaceae	28211|Alphaproteobacteria	-	-	-	-	-	-	-	-	-	-	-	-	-	-
RA01000072.1	224911.27351378	4.13e-211	586.0	COG1273@1|root,COG1273@2|Bacteria,1N4UX@1224|Proteobacteria,2TRTI@28211|Alphaproteobacteria,3JRH6@41294|Bradyrhizobiaceae	28211|Alphaproteobacteria	L	With LigD forms a non-homologous end joining (NHEJ) DNA repair enzyme, which repairs dsDNA breaks with reduced fidelity. Binds linear dsDNA with 5'- and 3'- overhangs but not closed circular dsDNA nor ssDNA. Recruits and stimulates the ligase activity of LigD	ku	-	-	ko:K10979	ko03450,map03450	-	-	-	ko00000,ko00001,ko03400	-	-	Ku
RA01000073.1	318996.AXAZ01000008_gene4174	3.26e-48	154.0	2AGYB@1|root,31771@2|Bacteria,1N19I@1224|Proteobacteria,2UBTV@28211|Alphaproteobacteria,3K06I@41294|Bradyrhizobiaceae	28211|Alphaproteobacteria	-	-	-	-	-	-	-	-	-	-	-	-	-	-
RA01000074.1	936455.KI421499_gene4155	5.93e-27	98.6	COG3847@1|root,COG3847@2|Bacteria,1NA5B@1224|Proteobacteria,2UFQD@28211|Alphaproteobacteria,3K0W0@41294|Bradyrhizobiaceae	28211|Alphaproteobacteria	U	Flp/Fap pilin component	-	-	-	ko:K02651	ko04112,map04112	-	-	-	ko00000,ko00001,ko02035,ko02044	-	-	Flp_Fap
RA01000075.1	335659.S23_48870	0.0	917.0	COG0213@1|root,COG0213@2|Bacteria,1MV3H@1224|Proteobacteria,2TS24@28211|Alphaproteobacteria,3JQN1@41294|Bradyrhizobiaceae	28211|Alphaproteobacteria	F	Thymidine phosphorylase	-	GO:0003674,GO:0003824,GO:0004645,GO:0005575,GO:0005622,GO:0005623,GO:0005737,GO:0005829,GO:0016740,GO:0016757,GO:0016758,GO:0044424,GO:0044444,GO:0044464	2.4.2.4	ko:K00758	ko00240,ko00983,ko01100,ko05219,map00240,map00983,map01100,map05219	-	R01570,R02484,R08222,R08230	RC00063	ko00000,ko00001,ko01000	-	-	Glycos_trans_3N,Glycos_transf_3,PYNP_C
RA01000076.1	224911.27351374	2.9e-166	471.0	COG0462@1|root,COG0462@2|Bacteria,1MUV7@1224|Proteobacteria,2U3AB@28211|Alphaproteobacteria,3JVN2@41294|Bradyrhizobiaceae	28211|Alphaproteobacteria	F	N-terminal domain of ribose phosphate pyrophosphokinase	-	-	2.7.6.1	ko:K00948	ko00030,ko00230,ko01100,ko01110,ko01120,ko01130,ko01200,ko01230,map00030,map00230,map01100,map01110,map01120,map01130,map01200,map01230	M00005	R01049	RC00002,RC00078	ko00000,ko00001,ko00002,ko01000	-	-	Pribosyltran,Pribosyltran_N
RA01000077.1	335659.S23_48890	0.0	979.0	COG1236@1|root,COG1236@2|Bacteria,1MUDD@1224|Proteobacteria,2TVFM@28211|Alphaproteobacteria,3JU89@41294|Bradyrhizobiaceae	28211|Alphaproteobacteria	J	Beta-Casp domain	-	-	-	ko:K07576	-	-	-	-	ko00000	-	-	Beta-Casp,Lactamase_B,Lactamase_B_2,RMMBL
RA01000078.1	224911.27351371	5.52e-313	860.0	COG4993@1|root,COG4993@2|Bacteria,1R6AV@1224|Proteobacteria,2TUKI@28211|Alphaproteobacteria,3JWX9@41294|Bradyrhizobiaceae	28211|Alphaproteobacteria	G	Dehydrogenase	-	-	-	-	-	-	-	-	-	-	-	-
RA01000079.1	319003.Bra1253DRAFT_02037	8.53e-222	613.0	COG0463@1|root,COG0463@2|Bacteria,1MWE5@1224|Proteobacteria,2TRRT@28211|Alphaproteobacteria,3JSQQ@41294|Bradyrhizobiaceae	28211|Alphaproteobacteria	M	glycosyl transferase family 2	-	-	-	ko:K20534	-	-	-	-	ko00000,ko01000,ko01005,ko02000	4.D.2.1.9	GT2	Glycos_transf_2
RA01000080.1	319003.Bra1253DRAFT_02038	6.08e-154	433.0	COG0500@1|root,COG2226@2|Bacteria,1R42G@1224|Proteobacteria,2U1CY@28211|Alphaproteobacteria,3JW23@41294|Bradyrhizobiaceae	28211|Alphaproteobacteria	Q	Methyltransferase domain	-	-	-	-	-	-	-	-	-	-	-	Methyltransf_11,Methyltransf_25
RA01000081.1	319003.Bra1253DRAFT_02039	3.52e-299	822.0	COG1287@1|root,COG1287@2|Bacteria,1N1IK@1224|Proteobacteria,2TUYH@28211|Alphaproteobacteria,3JSAB@41294|Bradyrhizobiaceae	28211|Alphaproteobacteria	S	oligosaccharyl transferase activity	-	-	-	-	-	-	-	-	-	-	-	-
RA01000082.1	1038862.KB893884_gene736	4.55e-137	389.0	29NNR@1|root,309KP@2|Bacteria,1R5Y4@1224|Proteobacteria,2VGS7@28211|Alphaproteobacteria,3K6JM@41294|Bradyrhizobiaceae	28211|Alphaproteobacteria	-	-	-	-	-	-	-	-	-	-	-	-	-	-
RA01000083.1	1037409.BJ6T_25860	0.0	1344.0	COG1529@1|root,COG1529@2|Bacteria,1QTTJ@1224|Proteobacteria,2TQVK@28211|Alphaproteobacteria,3JUJC@41294|Bradyrhizobiaceae	28211|Alphaproteobacteria	C	Aldehyde oxidase and xanthine dehydrogenase, a/b hammerhead domain	iorB	-	1.3.99.16	ko:K07303	-	-	-	-	ko00000,ko01000	-	-	Ald_Xan_dh_C2
RA01000084.1	113395.AXAI01000014_gene286	2.6e-101	294.0	COG2080@1|root,COG2080@2|Bacteria,1RD8C@1224|Proteobacteria,2U6Z6@28211|Alphaproteobacteria,3JW4F@41294|Bradyrhizobiaceae	28211|Alphaproteobacteria	C	[2Fe-2S] binding domain	-	-	1.3.99.16	ko:K07302	-	-	-	-	ko00000,ko01000	-	-	Fer2,Fer2_2
RA01000085.1	1038862.KB893884_gene739	3.68e-206	572.0	COG2207@1|root,COG2207@2|Bacteria,1RJPK@1224|Proteobacteria,2TYF7@28211|Alphaproteobacteria,3K6YZ@41294|Bradyrhizobiaceae	28211|Alphaproteobacteria	K	helix_turn_helix, arabinose operon control protein	-	-	-	ko:K07506	-	-	-	-	ko00000,ko03000	-	-	HTH_18
RA01000086.1	936455.KI421499_gene4162	2.36e-152	431.0	COG0596@1|root,COG0596@2|Bacteria,1R17M@1224|Proteobacteria,2TYXZ@28211|Alphaproteobacteria,3JZ3W@41294|Bradyrhizobiaceae	28211|Alphaproteobacteria	S	Alpha/beta hydrolase family	-	-	-	-	-	-	-	-	-	-	-	Abhydrolase_6
RA01000087.1	1038862.KB893884_gene741	7.34e-226	624.0	COG0667@1|root,COG0667@2|Bacteria,1MWGQ@1224|Proteobacteria,2TUJ8@28211|Alphaproteobacteria,3JR5J@41294|Bradyrhizobiaceae	28211|Alphaproteobacteria	C	Aldo/keto reductase family	-	-	1.1.1.122	ko:K00064	ko00051,ko00053,ko01100,ko01110,ko01120,map00051,map00053,map01100,map01110,map01120	M00114	R07675,R08926	RC00066,RC00161	ko00000,ko00001,ko00002,ko01000	-	-	Aldo_ket_red
RA01000089.1	1126627.BAWE01000004_gene3245	1.87e-144	410.0	COG0346@1|root,COG0346@2|Bacteria,1PP7M@1224|Proteobacteria,2U1ER@28211|Alphaproteobacteria,3JUX6@41294|Bradyrhizobiaceae	28211|Alphaproteobacteria	E	Glyoxalase/Bleomycin resistance protein/Dioxygenase superfamily	-	-	-	-	-	-	-	-	-	-	-	Glyoxalase
RA01000090.1	1038862.KB893884_gene743	4.93e-53	170.0	COG1359@1|root,COG1359@2|Bacteria,1RI9V@1224|Proteobacteria,2UB04@28211|Alphaproteobacteria,3JYNV@41294|Bradyrhizobiaceae	28211|Alphaproteobacteria	S	Antibiotic biosynthesis monooxygenase	-	-	-	-	-	-	-	-	-	-	-	ABM
RA01000091.1	936455.KI421499_gene4166	0.0	1535.0	COG3710@1|root,COG3903@1|root,COG3710@2|Bacteria,COG3903@2|Bacteria,1MWPD@1224|Proteobacteria,2TQQR@28211|Alphaproteobacteria,3JX7H@41294|Bradyrhizobiaceae	28211|Alphaproteobacteria	K	Transcriptional regulatory protein, C terminal	-	-	-	-	-	-	-	-	-	-	-	AAA_22,NB-ARC,Trans_reg_C
RA01000092.1	936455.KI421499_gene4167	0.0	1064.0	COG0028@1|root,COG0028@2|Bacteria,1MWC3@1224|Proteobacteria,2TTA2@28211|Alphaproteobacteria,3JS9T@41294|Bradyrhizobiaceae	28211|Alphaproteobacteria	EH	Thiamine pyrophosphate enzyme, central domain	MA20_15555	-	2.2.1.6	ko:K01652	ko00290,ko00650,ko00660,ko00770,ko01100,ko01110,ko01130,ko01210,ko01230,map00290,map00650,map00660,map00770,map01100,map01110,map01130,map01210,map01230	M00019,M00570	R00006,R00014,R00226,R03050,R04672,R04673,R08648	RC00027,RC00106,RC01192,RC02744,RC02893	ko00000,ko00001,ko00002,ko01000	-	-	TPP_enzyme_C,TPP_enzyme_M,TPP_enzyme_N
RA01000093.1	1038862.KB893884_gene746	0.0	1414.0	COG2203@1|root,COG4191@1|root,COG2203@2|Bacteria,COG4191@2|Bacteria,1RCM9@1224|Proteobacteria,2TTJ0@28211|Alphaproteobacteria,3JS5D@41294|Bradyrhizobiaceae	28211|Alphaproteobacteria	T	Domain present in phytochromes and cGMP-specific phosphodiesterases.	-	-	-	-	-	-	-	-	-	-	-	GAF,GAF_2,HAMP,HATPase_c,HisKA,PAS_7,dCache_1
RA01000094.1	936455.KI421499_gene4170	0.0	991.0	COG4425@1|root,COG4425@2|Bacteria,1MXSU@1224|Proteobacteria,2TV9M@28211|Alphaproteobacteria,3JUF9@41294|Bradyrhizobiaceae	28211|Alphaproteobacteria	S	Alpha/beta-hydrolase family N-terminus	-	-	-	-	-	-	-	-	-	-	-	Abhydrolase_9,Abhydrolase_9_N
RA01000095.1	1038862.KB893884_gene748	0.0	946.0	COG0477@1|root,COG2814@2|Bacteria,1MX2Q@1224|Proteobacteria,2TRNS@28211|Alphaproteobacteria,3JS7R@41294|Bradyrhizobiaceae	28211|Alphaproteobacteria	EGP	Fungal trichothecene efflux pump (TRI12)	MA20_15570	-	-	-	-	-	-	-	-	-	-	MFS_1
RA01000096.1	224911.27351361	2.08e-122	348.0	COG2983@1|root,COG2983@2|Bacteria,1RHMX@1224|Proteobacteria,2U99S@28211|Alphaproteobacteria,3JR5E@41294|Bradyrhizobiaceae	28211|Alphaproteobacteria	S	Belongs to the UPF0260 family	MA20_15575	-	-	ko:K09160	-	-	-	-	ko00000	-	-	CxxCxxCC
RA01000097.1	1037409.BJ6T_66610	0.0	1489.0	COG0744@1|root,COG0744@2|Bacteria,1QTST@1224|Proteobacteria,2TQQ8@28211|Alphaproteobacteria,3JR76@41294|Bradyrhizobiaceae	28211|Alphaproteobacteria	M	penicillin-binding protein	pbp	-	2.4.1.129,3.4.16.4	ko:K05366	ko00550,ko01100,ko01501,map00550,map01100,map01501	-	-	-	ko00000,ko00001,ko01000,ko01003,ko01011	-	GT51	Transgly,Transpeptidase
RA01000098.1	1037409.BJ6T_66620	2.09e-130	370.0	COG5402@1|root,COG5402@2|Bacteria,1N26C@1224|Proteobacteria,2TT9K@28211|Alphaproteobacteria,3JU6I@41294|Bradyrhizobiaceae	28211|Alphaproteobacteria	S	Protein of unknown function (DUF1214)	MA20_15585	-	-	-	-	-	-	-	-	-	-	DUF1214
RA01000099.1	1038866.KB902768_gene4999	2.7e-120	345.0	COG5436@1|root,COG5436@2|Bacteria,1MW0D@1224|Proteobacteria,2TU65@28211|Alphaproteobacteria,3JSRN@41294|Bradyrhizobiaceae	28211|Alphaproteobacteria	S	Protein of unknown function (DUF1254)	MA20_15590	-	-	-	-	-	-	-	-	-	-	DUF1254
RA01000100.1	1037409.BJ6T_20840	5.28e-88	262.0	COG1514@1|root,COG1514@2|Bacteria,1RF2Z@1224|Proteobacteria,2U8SN@28211|Alphaproteobacteria,3JZ35@41294|Bradyrhizobiaceae	28211|Alphaproteobacteria	J	2'-5' RNA ligase superfamily	-	-	-	-	-	-	-	-	-	-	-	2_5_RNA_ligase2
RA01000101.1	794846.AJQU01000082_gene5398	6.47e-38	145.0	COG0542@1|root,COG0542@2|Bacteria,1MV8B@1224|Proteobacteria,2TQUZ@28211|Alphaproteobacteria,4B77Y@82115|Rhizobiaceae	28211|Alphaproteobacteria	O	Belongs to the ClpA ClpB family	clpA	GO:0000166,GO:0003674,GO:0003824,GO:0004176,GO:0005488,GO:0005524,GO:0005575,GO:0005622,GO:0005623,GO:0005737,GO:0005829,GO:0006508,GO:0006807,GO:0006950,GO:0006979,GO:0008144,GO:0008150,GO:0008152,GO:0008233,GO:0009987,GO:0016462,GO:0016787,GO:0016817,GO:0016818,GO:0016887,GO:0017076,GO:0017111,GO:0019538,GO:0030554,GO:0032553,GO:0032555,GO:0032559,GO:0035639,GO:0036094,GO:0042623,GO:0043167,GO:…	-	ko:K03694	-	-	-	-	ko00000,ko03110	-	-	AAA,AAA_2,ClpB_D2-small,Clp_N
RA01000102.1	936455.KI421499_gene790	0.0	1131.0	COG4206@1|root,COG4206@2|Bacteria,1N71E@1224|Proteobacteria,2TU7B@28211|Alphaproteobacteria,3JVXG@41294|Bradyrhizobiaceae	28211|Alphaproteobacteria	H	TonB dependent receptor	-	-	-	-	-	-	-	-	-	-	-	Plug,TonB_dep_Rec
RA01000103.1	1038866.KB902768_gene4988	3.6e-92	269.0	COG3791@1|root,COG3791@2|Bacteria,1N6S5@1224|Proteobacteria,2UB03@28211|Alphaproteobacteria,3JYB6@41294|Bradyrhizobiaceae	28211|Alphaproteobacteria	S	Glutathione-dependent formaldehyde-activating enzyme	-	-	-	-	-	-	-	-	-	-	-	GFA
RA01000104.1	319003.Bra1253DRAFT_02062	2.29e-128	368.0	COG3848@1|root,COG3848@2|Bacteria,1R7DS@1224|Proteobacteria,2U3SK@28211|Alphaproteobacteria,3JSC8@41294|Bradyrhizobiaceae	28211|Alphaproteobacteria	T	Pyruvate phosphate dikinase	-	-	-	-	-	-	-	-	-	-	-	-
RA01000105.1	1038866.KB902768_gene4987	4.54e-184	514.0	COG1388@1|root,COG1388@2|Bacteria,1MY1S@1224|Proteobacteria,2TVJ0@28211|Alphaproteobacteria,3JTA5@41294|Bradyrhizobiaceae	28211|Alphaproteobacteria	M	Domain of Unknown Function (DUF1259)	-	-	-	-	-	-	-	-	-	-	-	DUF1529
RA01000106.1	1037409.BJ6T_66810	4.1e-220	611.0	COG0189@1|root,COG0189@2|Bacteria,1NX9V@1224|Proteobacteria,2TU7A@28211|Alphaproteobacteria,3JSIX@41294|Bradyrhizobiaceae	28211|Alphaproteobacteria	HJ	ligase activity	-	-	-	-	-	-	-	-	-	-	-	-
RA01000107.1	1040989.AWZU01000013_gene1659	1e-102	300.0	COG1309@1|root,COG1309@2|Bacteria,1NUS4@1224|Proteobacteria,2TQSX@28211|Alphaproteobacteria,3JWIJ@41294|Bradyrhizobiaceae	28211|Alphaproteobacteria	K	Bacterial regulatory proteins, tetR family	-	-	-	-	-	-	-	-	-	-	-	TetR_N
RA01000108.1	1380350.JIAP01000027_gene1912	5.14e-286	791.0	COG0654@1|root,COG0654@2|Bacteria,1MUN4@1224|Proteobacteria,2TQT8@28211|Alphaproteobacteria	28211|Alphaproteobacteria	CH	COG0654 2-polyprenyl-6-methoxyphenol hydroxylase and related FAD-dependent oxidoreductases	pcpB	-	1.14.13.127,1.14.13.50	ko:K03391,ko:K05712	ko00360,ko00361,ko00364,ko01100,ko01120,ko01220,map00360,map00361,map00364,map01100,map01120,map01220	M00545	R03982,R06786,R06787,R07779	RC00236,RC01932	ko00000,ko00001,ko00002,ko01000	-	-	FAD_binding_3
RA01000109.1	1038867.AXAY01000007_gene5951	3.27e-144	410.0	2DQE9@1|root,32UNX@2|Bacteria,1NZT3@1224|Proteobacteria,2TVPJ@28211|Alphaproteobacteria,3JWK2@41294|Bradyrhizobiaceae	28211|Alphaproteobacteria	-	-	-	-	-	-	-	-	-	-	-	-	-	-
RA01000110.1	189753.AXAS01000002_gene5472	3.44e-26	97.4	2BV7H@1|root,32QKZ@2|Bacteria,1NF6Z@1224|Proteobacteria,2UFRB@28211|Alphaproteobacteria,3K17J@41294|Bradyrhizobiaceae	28211|Alphaproteobacteria	-	-	-	-	-	-	-	-	-	-	-	-	-	-
RA01000111.1	318996.AXAZ01000008_gene4213	2.96e-90	265.0	2E8C5@1|root,332QT@2|Bacteria,1RH59@1224|Proteobacteria,2U725@28211|Alphaproteobacteria,3JYZM@41294|Bradyrhizobiaceae	28211|Alphaproteobacteria	-	-	-	-	-	-	-	-	-	-	-	-	-	-
RA01000112.1	318996.AXAZ01000008_gene4214	0.0	2068.0	COG0457@1|root,COG4995@1|root,COG0457@2|Bacteria,COG4995@2|Bacteria,1MWRF@1224|Proteobacteria,2TS2A@28211|Alphaproteobacteria,3JS1R@41294|Bradyrhizobiaceae	28211|Alphaproteobacteria	S	CHAT domain	-	-	-	-	-	-	-	-	-	-	-	CHAT,TPR_10,TPR_12
RA01000113.1	1126627.BAWE01000004_gene3211	2.41e-158	446.0	2CVSH@1|root,32SY5@2|Bacteria,1MVP4@1224|Proteobacteria,2TTAG@28211|Alphaproteobacteria,3JQUT@41294|Bradyrhizobiaceae	28211|Alphaproteobacteria	-	-	MA20_15675	-	-	-	-	-	-	-	-	-	-	-
RA01000114.1	1037409.BJ6T_66890	5.62e-33	114.0	2C35M@1|root,301N4@2|Bacteria,1N8YA@1224|Proteobacteria,2UFAA@28211|Alphaproteobacteria,3K1A0@41294|Bradyrhizobiaceae	28211|Alphaproteobacteria	-	-	-	-	-	-	-	-	-	-	-	-	-	-
RA01000115.1	224911.27351333	4.93e-204	568.0	COG5330@1|root,COG5330@2|Bacteria,1MUTG@1224|Proteobacteria,2U0SA@28211|Alphaproteobacteria,3JQV3@41294|Bradyrhizobiaceae	28211|Alphaproteobacteria	S	Uncharacterised protein conserved in bacteria (DUF2336)	-	-	-	-	-	-	-	-	-	-	-	DUF2336
RA01000116.1	1038862.KB893884_gene793	1.93e-77	230.0	COG5447@1|root,COG5447@2|Bacteria,1N1KU@1224|Proteobacteria,2UCBQ@28211|Alphaproteobacteria,3JYZB@41294|Bradyrhizobiaceae	28211|Alphaproteobacteria	S	Protein of unknown function (DUF1491)	MA20_15690	-	-	-	-	-	-	-	-	-	-	DUF1491
RA01000117.1	1304878.AUGD01000006_gene6669	3.83e-30	107.0	2C4Q2@1|root,33IFT@2|Bacteria,1N67U@1224|Proteobacteria,2UHJ8@28211|Alphaproteobacteria,3K17H@41294|Bradyrhizobiaceae	28211|Alphaproteobacteria	-	-	-	-	-	-	-	-	-	-	-	-	-	-
RA01000118.1	1037409.BJ6T_66920	5.26e-134	383.0	COG3409@1|root,COG3409@2|Bacteria,1NFKG@1224|Proteobacteria,2UI0E@28211|Alphaproteobacteria,3JVIT@41294|Bradyrhizobiaceae	28211|Alphaproteobacteria	M	Putative peptidoglycan binding domain	-	-	-	-	-	-	-	-	-	-	-	PG_binding_1
RA01000119.1	936455.KI421499_gene4201	0.0	1050.0	COG0642@1|root,COG2205@2|Bacteria,1NRP8@1224|Proteobacteria,2TSRP@28211|Alphaproteobacteria,3JSU6@41294|Bradyrhizobiaceae	28211|Alphaproteobacteria	T	His Kinase A (phosphoacceptor) domain	divJ	GO:0005575,GO:0005623,GO:0005886,GO:0016020,GO:0044464,GO:0071944	2.7.13.3	ko:K07716,ko:K11357	ko02020,ko04112,map02020,map04112	M00511	-	-	ko00000,ko00001,ko00002,ko01000,ko01001,ko02022	-	-	HATPase_c,HisKA,PAS,PAS_3,PAS_4
RA01000120.1	443598.AUFA01000002_gene2770	2.03e-85	253.0	2E4C7@1|root,32Z7R@2|Bacteria,1RBPI@1224|Proteobacteria,2U5ZQ@28211|Alphaproteobacteria,3JY81@41294|Bradyrhizobiaceae	28211|Alphaproteobacteria	S	Family of unknown function (DUF5330)	-	-	-	-	-	-	-	-	-	-	-	DUF5330
RA01000121.1	335659.S23_49280	2.92e-95	278.0	COG2166@1|root,COG2166@2|Bacteria,1RI8F@1224|Proteobacteria,2U9A2@28211|Alphaproteobacteria,3JY1C@41294|Bradyrhizobiaceae	28211|Alphaproteobacteria	S	Fe-S metabolism associated domain	sufE	-	-	ko:K02426	-	-	-	-	ko00000	-	-	SufE
RA01000122.1	224911.27351326	1.06e-90	266.0	COG4957@1|root,COG4957@2|Bacteria,1RGUW@1224|Proteobacteria,2U99M@28211|Alphaproteobacteria,3JY44@41294|Bradyrhizobiaceae	28211|Alphaproteobacteria	K	transcriptional regulator	MA20_15715	-	-	-	-	-	-	-	-	-	-	ROS_MUCR
RA01000123.1	224911.27351325	1.16e-86	268.0	2E7KS@1|root,3322S@2|Bacteria,1PBYA@1224|Proteobacteria,2U1J9@28211|Alphaproteobacteria,3JTUG@41294|Bradyrhizobiaceae	28211|Alphaproteobacteria	-	-	-	-	-	-	-	-	-	-	-	-	-	-
RA01000124.1	936455.KI421499_gene4206	0.0	1026.0	COG1807@1|root,COG1807@2|Bacteria,1NSSV@1224|Proteobacteria,2TSZG@28211|Alphaproteobacteria,3JU5Y@41294|Bradyrhizobiaceae	28211|Alphaproteobacteria	M	Dolichyl-phosphate-mannose-protein mannosyltransferase	MA20_15725	-	-	-	-	-	-	-	-	-	-	PMT_2
RA01000125.1	936455.KI421499_gene4207	7.67e-188	521.0	COG0235@1|root,COG0235@2|Bacteria,1MWP9@1224|Proteobacteria,2TRMV@28211|Alphaproteobacteria,3JSHD@41294|Bradyrhizobiaceae	28211|Alphaproteobacteria	G	Class II Aldolase and Adducin N-terminal domain	MA20_15730	-	-	-	-	-	-	-	-	-	-	Aldolase_II
RA01000126.1	224911.27351322	0.0	916.0	COG0624@1|root,COG0624@2|Bacteria,1MW20@1224|Proteobacteria,2TQY4@28211|Alphaproteobacteria,3JQX1@41294|Bradyrhizobiaceae	28211|Alphaproteobacteria	E	Peptidase dimerisation domain	MA20_15735	-	-	ko:K01436	-	-	-	-	ko00000,ko01000,ko01002	-	-	M20_dimer,Peptidase_M20
RA01000127.1	224911.27351321	3e-288	791.0	2E18T@1|root,32WP4@2|Bacteria,1MX16@1224|Proteobacteria,2TVK4@28211|Alphaproteobacteria,3JQYW@41294|Bradyrhizobiaceae	28211|Alphaproteobacteria	S	Glycosyltransferase family 87	-	-	-	-	-	-	-	-	-	-	-	GT87
RA01000128.1	936455.KI421499_gene4210	0.0	935.0	COG0433@1|root,COG0433@2|Bacteria,1MU59@1224|Proteobacteria,2TRU8@28211|Alphaproteobacteria,3JRPZ@41294|Bradyrhizobiaceae	28211|Alphaproteobacteria	S	Bacterial protein of unknown function (DUF853)	yjgR	-	-	ko:K06915	-	-	-	-	ko00000	-	-	DUF853
RA01000129.1	1304878.AUGD01000006_gene6680	1.57e-40	138.0	2AUTH@1|root,31KGJ@2|Bacteria,1RH09@1224|Proteobacteria,2UAJV@28211|Alphaproteobacteria,3JYQI@41294|Bradyrhizobiaceae	28211|Alphaproteobacteria	-	-	MA20_15750	-	-	-	-	-	-	-	-	-	-	DUF2780
RA01000130.1	319003.Bra1253DRAFT_02099	5.31e-85	251.0	COG3743@1|root,COG3743@2|Bacteria,1RA3K@1224|Proteobacteria,2U7GQ@28211|Alphaproteobacteria,3JY2M@41294|Bradyrhizobiaceae	28211|Alphaproteobacteria	S	Domain of unknown function (DUF4332)	MA20_15755	-	-	-	-	-	-	-	-	-	-	DUF4332
RA01000131.1	1037409.BJ6T_67050	2.51e-180	504.0	COG0294@1|root,COG0294@2|Bacteria,1MUIR@1224|Proteobacteria,2TTMG@28211|Alphaproteobacteria,3JRVE@41294|Bradyrhizobiaceae	28211|Alphaproteobacteria	H	Catalyzes the condensation of para-aminobenzoate (pABA) with 6-hydroxymethyl-7,8-dihydropterin diphosphate (DHPt-PP) to form 7,8-dihydropteroate (H2Pte), the immediate precursor of folate derivatives	folP	-	2.5.1.15,2.7.6.3	ko:K00796,ko:K13941,ko:K18824	ko00790,ko01100,map00790,map01100	M00126,M00840,M00841	R03066,R03067,R03503	RC00002,RC00017,RC00121,RC00842	ko00000,ko00001,ko00002,ko01000,ko01504	-	-	Pterin_bind
RA01000132.1	1037409.BJ6T_67060	1.54e-80	239.0	COG1539@1|root,COG1539@2|Bacteria,1RHII@1224|Proteobacteria,2UGT3@28211|Alphaproteobacteria,3JZ50@41294|Bradyrhizobiaceae	28211|Alphaproteobacteria	H	Catalyzes the conversion of 7,8-dihydroneopterin to 6- hydroxymethyl-7,8-dihydropterin	folB	-	1.13.11.81,4.1.2.25,5.1.99.8	ko:K01633	ko00790,ko01100,map00790,map01100	M00126,M00840	R03504,R11037,R11073	RC00721,RC00943,RC01479,RC03333,RC03334	ko00000,ko00001,ko00002,ko01000	-	-	FolB
RA01000133.1	335659.S23_49400	2.14e-111	320.0	COG0801@1|root,COG0801@2|Bacteria,1MZH8@1224|Proteobacteria,2U8D6@28211|Alphaproteobacteria,3JWAZ@41294|Bradyrhizobiaceae	28211|Alphaproteobacteria	H	7,8-dihydro-6-hydroxymethylpterin-pyrophosphokinase (HPPK)	folK	-	2.7.6.3,4.1.2.25	ko:K00950,ko:K13940	ko00790,ko01100,map00790,map01100	M00126,M00841	R03503,R03504	RC00002,RC00017,RC00721,RC00943	ko00000,ko00001,ko00002,ko01000	-	-	HPPK
RA01000134.1	1037409.BJ6T_67080	0.0	1128.0	COG1884@1|root,COG1884@2|Bacteria,1NR2K@1224|Proteobacteria,2TSYT@28211|Alphaproteobacteria,3JR6E@41294|Bradyrhizobiaceae	28211|Alphaproteobacteria	I	Methylmalonyl-CoA mutase	mutA	-	5.4.99.2	ko:K01847	ko00280,ko00630,ko00640,ko00720,ko01100,ko01120,ko01200,map00280,map00630,map00640,map00720,map01100,map01120,map01200	M00373,M00376,M00741	R00833	RC00395	ko00000,ko00001,ko00002,ko01000	-	-	MM_CoA_mutase
RA01000135.1	189753.AXAS01000022_gene2083	5.27e-110	316.0	COG3791@1|root,COG3791@2|Bacteria,1RE8S@1224|Proteobacteria,2U73V@28211|Alphaproteobacteria,3JVB0@41294|Bradyrhizobiaceae	28211|Alphaproteobacteria	S	Glutathione-dependent formaldehyde-activating enzyme	-	-	-	-	-	-	-	-	-	-	-	GFA
RA01000136.1	319003.Bra1253DRAFT_02105	0.0	1379.0	COG1884@1|root,COG2185@1|root,COG1884@2|Bacteria,COG2185@2|Bacteria,1MUXX@1224|Proteobacteria,2TQYC@28211|Alphaproteobacteria,3JSBP@41294|Bradyrhizobiaceae	28211|Alphaproteobacteria	I	Methylmalonyl-CoA mutase	mutB	-	5.4.99.2	ko:K01847	ko00280,ko00630,ko00640,ko00720,ko01100,ko01120,ko01200,map00280,map00630,map00640,map00720,map01100,map01120,map01200	M00373,M00376,M00741	R00833	RC00395	ko00000,ko00001,ko00002,ko01000	-	-	B12-binding,MM_CoA_mutase
RA01000137.1	318996.AXAZ01000008_gene4238	3.91e-56	175.0	COG1669@1|root,COG1669@2|Bacteria,1N8UR@1224|Proteobacteria,2UCPC@28211|Alphaproteobacteria,3K09W@41294|Bradyrhizobiaceae	28211|Alphaproteobacteria	S	Nucleotidyltransferase domain	-	-	-	ko:K07075	-	-	-	-	ko00000	-	-	NTP_transf_2
RA01000138.1	1037409.BJ6T_67130	4.66e-163	459.0	2ANQE@1|root,31DQ0@2|Bacteria,1MWJD@1224|Proteobacteria,2TTQI@28211|Alphaproteobacteria,3JRIK@41294|Bradyrhizobiaceae	28211|Alphaproteobacteria	S	Protein of unknown function (DUF3298)	-	-	-	-	-	-	-	-	-	-	-	DUF3298,DUF4163
RA01000139.1	936455.KI421499_gene4221	9.78e-232	638.0	COG3181@1|root,COG3181@2|Bacteria,1MU58@1224|Proteobacteria,2TTFX@28211|Alphaproteobacteria,3JUX5@41294|Bradyrhizobiaceae	28211|Alphaproteobacteria	S	Tripartite tricarboxylate transporter family receptor	MA20_15805	-	-	-	-	-	-	-	-	-	-	TctC
RA01000140.1	318996.AXAZ01000008_gene4242	2.1e-109	315.0	2E6D9@1|root,3310W@2|Bacteria,1R35H@1224|Proteobacteria,2TZY3@28211|Alphaproteobacteria,3K71G@41294|Bradyrhizobiaceae	28211|Alphaproteobacteria	S	Tripartite tricarboxylate transporter TctB family	-	-	-	ko:K07794	ko02020,map02020	-	-	-	ko00000,ko00001,ko02000	2.A.80.1	-	TctB
RA01000141.1	318996.AXAZ01000008_gene4243	0.0	931.0	COG3333@1|root,COG3333@2|Bacteria,1MUKR@1224|Proteobacteria,2TR4Q@28211|Alphaproteobacteria,3JWA0@41294|Bradyrhizobiaceae	28211|Alphaproteobacteria	S	Tripartite tricarboxylate transporter TctA family	MA20_15815	-	-	-	-	-	-	-	-	-	-	TctA
RA01000142.1	936455.KI421499_gene4224	1.26e-222	615.0	COG1703@1|root,COG1703@2|Bacteria,1MVI0@1224|Proteobacteria,2TS96@28211|Alphaproteobacteria,3JRRJ@41294|Bradyrhizobiaceae	28211|Alphaproteobacteria	E	LAO AO transport system	argK	-	-	ko:K07588	-	-	-	-	ko00000,ko01000	-	-	ArgK
RA01000143.1	1038862.KB893895_gene6993	1.01e-143	406.0	COG2039@1|root,COG2039@2|Bacteria,1MWYG@1224|Proteobacteria,2TU8G@28211|Alphaproteobacteria,3JQYT@41294|Bradyrhizobiaceae	28211|Alphaproteobacteria	O	Removes 5-oxoproline from various penultimate amino acid residues except L-proline	MA20_15835	-	3.4.19.3	ko:K01304	-	-	-	-	ko00000,ko01000,ko01002	-	-	Peptidase_C15
RA01000144.1	1038862.KB893895_gene6994	2.58e-309	845.0	COG5434@1|root,COG5434@2|Bacteria,1N3IG@1224|Proteobacteria,2U0A8@28211|Alphaproteobacteria,3JSMH@41294|Bradyrhizobiaceae	28211|Alphaproteobacteria	M	Right handed beta helix region	MA20_15840	-	-	-	-	-	-	-	-	-	-	Beta_helix,Pectate_lyase_3
RA01000145.1	1038867.AXAY01000026_gene1360	6.1e-64	195.0	COG2827@1|root,COG2827@2|Bacteria,1MZ4K@1224|Proteobacteria,2UHPS@28211|Alphaproteobacteria,3JZIS@41294|Bradyrhizobiaceae	28211|Alphaproteobacteria	L	GIY-YIG catalytic domain	-	-	-	ko:K07461	-	-	-	-	ko00000	-	-	GIY-YIG
RA01000146.1	1304878.AUGD01000006_gene6696	1.29e-96	289.0	28VSQ@1|root,2ZHUH@2|Bacteria,1N2DW@1224|Proteobacteria,2UCYN@28211|Alphaproteobacteria,3K1J6@41294|Bradyrhizobiaceae	28211|Alphaproteobacteria	-	-	-	-	-	-	-	-	-	-	-	-	-	-
RA01000147.1	1037409.BJ6T_67230	0.0	934.0	COG1404@1|root,COG1404@2|Bacteria,1MU3S@1224|Proteobacteria,2TT0E@28211|Alphaproteobacteria,3JTSC@41294|Bradyrhizobiaceae	28211|Alphaproteobacteria	O	Subtilase family	-	-	-	-	-	-	-	-	-	-	-	Peptidase_S8
RA01000148.1	1304877.KI519399_gene4182	2.92e-140	399.0	COG5662@1|root,COG5662@2|Bacteria,1QPSZ@1224|Proteobacteria,2TU7W@28211|Alphaproteobacteria,3JSW8@41294|Bradyrhizobiaceae	28211|Alphaproteobacteria	K	AntiSigma factor	-	-	-	-	-	-	-	-	-	-	-	-
RA01000149.1	1038866.KB902768_gene4930	7.6e-127	361.0	COG1595@1|root,COG1595@2|Bacteria,1MVPD@1224|Proteobacteria,2TVKC@28211|Alphaproteobacteria,3JTB7@41294|Bradyrhizobiaceae	28211|Alphaproteobacteria	K	Belongs to the sigma-70 factor family. ECF subfamily	MA20_15865	-	-	ko:K03088	-	-	-	-	ko00000,ko03021	-	-	Sigma70_r2,Sigma70_r4,Sigma70_r4_2
RA01000150.1	443598.AUFA01000002_gene2742	2.14e-233	647.0	COG2199@1|root,COG3706@2|Bacteria,1RD8D@1224|Proteobacteria,2U0TB@28211|Alphaproteobacteria,3JRD3@41294|Bradyrhizobiaceae	28211|Alphaproteobacteria	T	diguanylate cyclase	-	-	2.7.7.65	ko:K21019	ko02025,map02025	-	-	-	ko00000,ko00001,ko01000	-	-	GGDEF,MASE1,PAS,PAS_3,PAS_4
RA01000151.1	335659.S23_49570	1.52e-228	633.0	COG5330@1|root,COG5330@2|Bacteria,1R3VY@1224|Proteobacteria,2TUQ8@28211|Alphaproteobacteria,3JSHG@41294|Bradyrhizobiaceae	28211|Alphaproteobacteria	S	Uncharacterised protein conserved in bacteria (DUF2336)	-	-	-	-	-	-	-	-	-	-	-	DUF2336
RA01000152.1	318996.AXAZ01000008_gene4253	6.73e-130	371.0	COG4944@1|root,COG4944@2|Bacteria,1MXEV@1224|Proteobacteria,2TQKY@28211|Alphaproteobacteria,3JUGU@41294|Bradyrhizobiaceae	28211|Alphaproteobacteria	S	Protein of unknown function (DUF1109)	MA20_15880	-	-	-	-	-	-	-	-	-	-	DUF1109
RA01000153.1	224911.27351296	2.83e-117	337.0	COG1595@1|root,COG1595@2|Bacteria,1MVS7@1224|Proteobacteria,2U0XJ@28211|Alphaproteobacteria,3JSXU@41294|Bradyrhizobiaceae	28211|Alphaproteobacteria	K	Belongs to the sigma-70 factor family. ECF subfamily	MA20_15885	-	-	ko:K03088	-	-	-	-	ko00000,ko03021	-	-	Sigma70_r2,Sigma70_r4_2
RA01000154.1	224911.27351295	6.01e-94	281.0	2A5MM@1|root,30UCA@2|Bacteria,1Q16S@1224|Proteobacteria,2U0RI@28211|Alphaproteobacteria,3JUXX@41294|Bradyrhizobiaceae	28211|Alphaproteobacteria	-	-	-	-	-	-	-	-	-	-	-	-	-	-
RA01000155.1	1304877.KI519399_gene4175	8.28e-177	493.0	COG1024@1|root,COG1024@2|Bacteria,1MWZC@1224|Proteobacteria,2TRYS@28211|Alphaproteobacteria,3JSFG@41294|Bradyrhizobiaceae	28211|Alphaproteobacteria	I	Belongs to the enoyl-CoA hydratase isomerase family	MA20_15895	-	4.2.1.17	ko:K01692	ko00071,ko00280,ko00281,ko00310,ko00360,ko00362,ko00380,ko00410,ko00627,ko00640,ko00650,ko00903,ko00930,ko01100,ko01110,ko01120,ko01130,ko01212,map00071,map00280,map00281,map00310,map00360,map00362,map00380,map00410,map00627,map00640,map00650,map00903,map00930,map01100,map01110,map01120,map01130,map01212	M00032,M00087	R03026,R03045,R04137,R04170,R04204,R04224,R04738,R04740,R04744,R04746,R04749,R05595,R06411,R06412,R06942,R08093	RC00831,RC00834,RC01086,RC01095,RC01098,RC01103,RC01217,RC02115	ko00000,ko00001,ko00002,ko01000	-	-	ECH_1
RA01000156.1	224911.27351293	8.14e-295	810.0	COG1538@1|root,COG1538@2|Bacteria,1MWCJ@1224|Proteobacteria,2TR3S@28211|Alphaproteobacteria,3JQR2@41294|Bradyrhizobiaceae	28211|Alphaproteobacteria	MU	Outer membrane efflux protein	tolC	-	-	ko:K12340	ko01501,ko01503,ko02020,ko03070,ko04626,ko05133,map01501,map01503,map02020,map03070,map04626,map05133	M00325,M00326,M00339,M00571,M00575,M00646,M00647,M00696,M00697,M00709,M00720,M00821	-	-	ko00000,ko00001,ko00002,ko01504,ko02000,ko02044	1.B.17,2.A.6.2	-	OEP
RA01000157.1	1126627.BAWE01000004_gene3169	6.47e-122	348.0	COG0563@1|root,COG0563@2|Bacteria,1R4TI@1224|Proteobacteria,2TSIR@28211|Alphaproteobacteria,3JX16@41294|Bradyrhizobiaceae	28211|Alphaproteobacteria	F	adenylate kinase	-	-	-	-	-	-	-	-	-	-	-	AAA_18
RA01000158.1	1037409.BJ6T_67340	2.62e-206	572.0	COG3618@1|root,COG3618@2|Bacteria,1N2QM@1224|Proteobacteria,2TTZK@28211|Alphaproteobacteria,3JSUM@41294|Bradyrhizobiaceae	28211|Alphaproteobacteria	S	Amidohydrolase	MA20_15910	-	-	-	-	-	-	-	-	-	-	Amidohydro_2
RA01000159.1	318996.AXAZ01000008_gene4260	0.0	1906.0	COG3696@1|root,COG3696@2|Bacteria,1NUIV@1224|Proteobacteria,2TRWM@28211|Alphaproteobacteria,3JQRG@41294|Bradyrhizobiaceae	28211|Alphaproteobacteria	P	Belongs to the resistance-nodulation-cell division (RND) (TC 2.A.6) family	MA20_15915	-	-	ko:K15726	-	-	-	-	ko00000,ko02000	2.A.6.1.2	-	ACR_tran
RA01000160.1	319003.Bra1253DRAFT_02132	3.01e-274	753.0	COG0845@1|root,COG0845@2|Bacteria,1MVAS@1224|Proteobacteria,2TUDB@28211|Alphaproteobacteria,3JSKM@41294|Bradyrhizobiaceae	28211|Alphaproteobacteria	M	Belongs to the membrane fusion protein (MFP) (TC 8.A.1) family	MA20_15920	-	-	ko:K15727	-	-	-	-	ko00000,ko02000	8.A.1.2.1	-	HlyD_D23
RA01000161.1	1037409.BJ6T_67370	4.42e-316	863.0	COG1804@1|root,COG1804@2|Bacteria,1MU2K@1224|Proteobacteria,2TT4A@28211|Alphaproteobacteria,3JU8B@41294|Bradyrhizobiaceae	28211|Alphaproteobacteria	C	CoA-transferase family III	-	-	-	-	-	-	-	-	-	-	-	CoA_transf_3
RA01000162.1	1038866.KB902768_gene4917	7.72e-57	177.0	2CMAN@1|root,32SE6@2|Bacteria,1RIK0@1224|Proteobacteria,2U9U4@28211|Alphaproteobacteria,3JZGB@41294|Bradyrhizobiaceae	28211|Alphaproteobacteria	-	-	MA20_15930	-	-	-	-	-	-	-	-	-	-	-
RA01000163.1	189753.AXAS01000023_gene813	0.0	2129.0	COG0587@1|root,COG0587@2|Bacteria,1MUE4@1224|Proteobacteria,2TRUB@28211|Alphaproteobacteria,3JUU5@41294|Bradyrhizobiaceae	28211|Alphaproteobacteria	L	DNA polymerase involved in damage-induced mutagenesis and translesion synthesis (TLS). It is not the major replicative DNA polymerase	dnaE2	GO:0006950,GO:0006974,GO:0007154,GO:0008150,GO:0009432,GO:0009605,GO:0009987,GO:0009991,GO:0031668,GO:0033554,GO:0050896,GO:0051716,GO:0071496	2.7.7.7	ko:K02337,ko:K14162	ko00230,ko00240,ko01100,ko03030,ko03430,ko03440,map00230,map00240,map01100,map03030,map03430,map03440	M00260	R00375,R00376,R00377,R00378	RC02795	ko00000,ko00001,ko00002,ko01000,ko03032,ko03400	-	-	DNA_pol3_alpha,HHH_6,PHP,tRNA_anti-codon
RA01000164.1	936455.KI421499_gene4246	0.0	913.0	COG0389@1|root,COG0389@2|Bacteria,1MU5X@1224|Proteobacteria,2TQVR@28211|Alphaproteobacteria,3JQX0@41294|Bradyrhizobiaceae	28211|Alphaproteobacteria	L	impB/mucB/samB family	MA20_15945	-	-	ko:K14161	-	-	-	-	ko00000,ko03400	-	-	IMS,IMS_C
RA01000165.1	319003.Bra1253DRAFT_02138	4.07e-174	487.0	COG4544@1|root,COG4544@2|Bacteria,1MY56@1224|Proteobacteria,2TT91@28211|Alphaproteobacteria,3JRBP@41294|Bradyrhizobiaceae	28211|Alphaproteobacteria	S	SOS response	-	-	-	ko:K14160	-	-	-	-	ko00000,ko03400	-	-	-
RA01000166.1	1038866.KB902768_gene4912	5.57e-288	787.0	COG4277@1|root,COG4277@2|Bacteria,1MVCV@1224|Proteobacteria,2TT5U@28211|Alphaproteobacteria,3JSTF@41294|Bradyrhizobiaceae	28211|Alphaproteobacteria	S	Helix-hairpin-helix DNA-binding motif class 1	MA20_15955	-	-	-	-	-	-	-	-	-	-	Radical_SAM
RA01000167.1	936455.KI421499_gene4249	0.0	922.0	COG1573@1|root,COG1573@2|Bacteria,1MW8T@1224|Proteobacteria,2TSAR@28211|Alphaproteobacteria,3JS5N@41294|Bradyrhizobiaceae	28211|Alphaproteobacteria	L	UreE urease accessory protein, C-terminal domain	MA20_15960	-	3.2.2.27	ko:K21929	ko03410,map03410	-	-	-	ko00000,ko00001,ko01000,ko03400	-	-	DUF4130,UDG
RA01000168.1	1038862.KB893895_gene7021	0.0	1007.0	COG0306@1|root,COG0306@2|Bacteria,1MVXK@1224|Proteobacteria,2TU98@28211|Alphaproteobacteria,3JSN4@41294|Bradyrhizobiaceae	28211|Alphaproteobacteria	P	Phosphate transporter family	-	-	-	ko:K03306	-	-	-	-	ko00000	2.A.20	-	PHO4
RA01000169.1	224911.27351279	1.29e-280	767.0	COG1473@1|root,COG1473@2|Bacteria,1MUIV@1224|Proteobacteria,2TR5B@28211|Alphaproteobacteria,3JRHP@41294|Bradyrhizobiaceae	28211|Alphaproteobacteria	S	amidohydrolase	MA20_15970	-	-	-	-	-	-	-	-	-	-	M20_dimer,Peptidase_M20
RA01000170.1	335659.S23_49800	0.0	1077.0	COG2303@1|root,COG2303@2|Bacteria,1MV19@1224|Proteobacteria,2TQKQ@28211|Alphaproteobacteria,3JSZ3@41294|Bradyrhizobiaceae	28211|Alphaproteobacteria	E	GMC oxidoreductase	MA20_15975	-	1.1.99.1	ko:K00108	ko00260,ko01100,map00260,map01100	M00555	R01025	RC00087	ko00000,ko00001,ko00002,ko01000	-	-	GMC_oxred_C,GMC_oxred_N
RA01000171.1	936455.KI421499_gene4253	8.97e-183	511.0	COG2267@1|root,COG2267@2|Bacteria,1N8UK@1224|Proteobacteria,2U35V@28211|Alphaproteobacteria,3JX10@41294|Bradyrhizobiaceae	28211|Alphaproteobacteria	I	Serine aminopeptidase, S33	-	-	-	-	-	-	-	-	-	-	-	Abhydrolase_1,Abhydrolase_6
RA01000172.1	224911.27351274	6.36e-229	630.0	COG1409@1|root,COG1409@2|Bacteria,1MUQJ@1224|Proteobacteria,2TTSK@28211|Alphaproteobacteria,3JQXS@41294|Bradyrhizobiaceae	28211|Alphaproteobacteria	S	Calcineurin-like phosphoesterase	-	-	-	-	-	-	-	-	-	-	-	Metallophos
RA01000173.1	1037409.BJ6T_67500	7.08e-74	221.0	COG3794@1|root,COG3794@2|Bacteria,1RI9G@1224|Proteobacteria,2U7KA@28211|Alphaproteobacteria,3JYXK@41294|Bradyrhizobiaceae	28211|Alphaproteobacteria	C	Copper binding proteins, plastocyanin/azurin family	-	-	-	-	-	-	-	-	-	-	-	Copper-bind,Cupredoxin_1
RA01000174.1	319003.Bra1253DRAFT_02147	3.79e-119	341.0	COG1595@1|root,COG1595@2|Bacteria,1NRNT@1224|Proteobacteria,2TT5K@28211|Alphaproteobacteria,3JTET@41294|Bradyrhizobiaceae	28211|Alphaproteobacteria	K	Belongs to the sigma-70 factor family. ECF subfamily	-	-	-	ko:K03088	-	-	-	-	ko00000,ko03021	-	-	Sigma70_r2,Sigma70_r4_2
RA01000175.1	1038862.KB893895_gene7028	5.14e-169	473.0	COG5662@1|root,COG5662@2|Bacteria,1MV95@1224|Proteobacteria,2TVRG@28211|Alphaproteobacteria,3JRXS@41294|Bradyrhizobiaceae	28211|Alphaproteobacteria	K	Putative zinc-finger	-	-	-	-	-	-	-	-	-	-	-	zf-HC2
RA01000176.1	936455.KI421499_gene4259	0.0	904.0	COG4992@1|root,COG4992@2|Bacteria,1R6U9@1224|Proteobacteria,2TUDK@28211|Alphaproteobacteria,3JTSX@41294|Bradyrhizobiaceae	28211|Alphaproteobacteria	E	Belongs to the class-III pyridoxal-phosphate-dependent aminotransferase family	MA20_16020	-	2.6.1.13	ko:K00819	ko00330,ko01100,ko01110,ko01130,map00330,map01100,map01110,map01130	-	R00667	RC00006,RC00062	ko00000,ko00001,ko01000,ko01007	-	-	Aminotran_3
RA01000177.1	224911.27351267	2.51e-127	365.0	COG4731@1|root,COG4731@2|Bacteria,1R5BG@1224|Proteobacteria,2TRQI@28211|Alphaproteobacteria,3JY24@41294|Bradyrhizobiaceae	28211|Alphaproteobacteria	S	Uncharacterized protein conserved in bacteria (DUF2147)	-	-	-	-	-	-	-	-	-	-	-	DUF2147
RA01000178.1	318996.AXAZ01000008_gene4279	0.0	1563.0	COG4258@1|root,COG4258@2|Bacteria,1QW57@1224|Proteobacteria,2TSFU@28211|Alphaproteobacteria,3JQM0@41294|Bradyrhizobiaceae	28211|Alphaproteobacteria	S	MMPL family	MA20_16030	-	-	ko:K07003	-	-	-	-	ko00000	-	-	MMPL
RA01000179.1	1038862.KB893895_gene7033	3.18e-210	582.0	COG0761@1|root,COG0761@2|Bacteria,1MU7G@1224|Proteobacteria,2TRNR@28211|Alphaproteobacteria,3JS8Q@41294|Bradyrhizobiaceae	28211|Alphaproteobacteria	IM	Catalyzes the conversion of 1-hydroxy-2-methyl-2-(E)- butenyl 4-diphosphate (HMBPP) into a mixture of isopentenyl diphosphate (IPP) and dimethylallyl diphosphate (DMAPP). Acts in the terminal step of the DOXP MEP pathway for isoprenoid precursor biosynthesis	ispH	-	1.17.7.4	ko:K03527	ko00900,ko01100,ko01110,ko01130,map00900,map01100,map01110,map01130	M00096	R05884,R08210	RC01137,RC01487	ko00000,ko00001,ko00002,ko01000	-	-	LYTB
RA01000180.1	224911.27351264	6.46e-288	785.0	COG0535@1|root,COG0535@2|Bacteria,1MXM1@1224|Proteobacteria,2TT7D@28211|Alphaproteobacteria,3JVYI@41294|Bradyrhizobiaceae	28211|Alphaproteobacteria	S	Domain of unknown function (DUF3463)	MA20_16040	-	-	-	-	-	-	-	-	-	-	DUF3463,Fer4_12,Fer4_14,Radical_SAM
RA01000183.1	1037409.BJ6T_67620	4.91e-159	447.0	COG0775@1|root,COG0775@2|Bacteria,1PETT@1224|Proteobacteria,2TTTB@28211|Alphaproteobacteria,3JRPM@41294|Bradyrhizobiaceae	28211|Alphaproteobacteria	F	Phosphorylase superfamily	MA20_16045	-	3.2.2.9	ko:K01243	ko00270,ko01100,ko01230,map00270,map01100,map01230	M00034,M00609	R00194,R01401	RC00063,RC00318	ko00000,ko00001,ko00002,ko01000	-	-	PNP_UDP_1
RA01000184.1	936455.KI421499_gene4271	0.0	1303.0	COG1657@1|root,COG1657@2|Bacteria,1MUIP@1224|Proteobacteria,2TRF3@28211|Alphaproteobacteria,3JRDS@41294|Bradyrhizobiaceae	28211|Alphaproteobacteria	I	Squalene-hopene cyclase C-terminal domain	shc	-	4.2.1.129,5.4.99.17	ko:K06045	ko00909,ko01110,map00909,map01110	-	R07322,R07323	RC01850,RC01851	ko00000,ko00001,ko01000	-	-	SQHop_cyclase_C,SQHop_cyclase_N
RA01000185.1	224911.27351261	2.59e-293	801.0	COG1233@1|root,COG1233@2|Bacteria,1QU52@1224|Proteobacteria,2TW02@28211|Alphaproteobacteria,3JU29@41294|Bradyrhizobiaceae	28211|Alphaproteobacteria	Q	Flavin containing amine oxidoreductase	MA20_16055	-	1.17.8.1	ko:K21677	-	-	-	-	ko00000,ko01000	-	-	Amino_oxidase
RA01000186.1	318996.AXAZ01000008_gene4285	2.69e-192	534.0	COG1562@1|root,COG1562@2|Bacteria,1MX4W@1224|Proteobacteria,2TTI0@28211|Alphaproteobacteria,3JUXY@41294|Bradyrhizobiaceae	28211|Alphaproteobacteria	I	Squalene/phytoene synthase	hpnD	-	2.5.1.103,2.5.1.32,2.5.1.99	ko:K02291,ko:K21678	ko00906,ko01062,ko01100,ko01110,map00906,map01062,map01100,map01110	M00097	R02065,R04218,R07270,R10177	RC00362,RC01101,RC02869	ko00000,ko00001,ko00002,ko01000,ko01006	-	-	SQS_PSY
RA01000187.1	1038862.KB893895_gene7044	2.72e-204	566.0	COG1562@1|root,COG1562@2|Bacteria,1N6J2@1224|Proteobacteria,2TT8U@28211|Alphaproteobacteria,3JQW6@41294|Bradyrhizobiaceae	28211|Alphaproteobacteria	I	Squalene/phytoene synthase	hpnC	-	2.5.1.103,4.2.3.156	ko:K21678,ko:K21679	-	-	-	-	ko00000,ko01000	-	-	SQS_PSY
RA01000188.1	1038862.KB893895_gene7045	1.02e-46	150.0	2BSH8@1|root,32MJH@2|Bacteria,1N1EH@1224|Proteobacteria,2UC6G@28211|Alphaproteobacteria,3K04P@41294|Bradyrhizobiaceae	28211|Alphaproteobacteria	-	-	MA20_16070	-	-	-	-	-	-	-	-	-	-	Cys_rich_FGFR
RA01000189.1	1038862.KB893895_gene7046	3.34e-107	310.0	2C2M3@1|root,316DE@2|Bacteria,1R7TZ@1224|Proteobacteria,2UB1Y@28211|Alphaproteobacteria,3JY7G@41294|Bradyrhizobiaceae	28211|Alphaproteobacteria	-	-	MA20_16080	-	-	-	-	-	-	-	-	-	-	-
RA01000191.1	936455.KI421499_gene4279	0.0	1456.0	COG1033@1|root,COG1033@2|Bacteria,1MUE1@1224|Proteobacteria,2TRI9@28211|Alphaproteobacteria,3JR7Y@41294|Bradyrhizobiaceae	28211|Alphaproteobacteria	S	MMPL family	MA20_16090	-	-	ko:K07003	-	-	-	-	ko00000	-	-	MMPL
RA01000192.1	224911.27351254	1.47e-155	440.0	COG4302@1|root,COG4302@2|Bacteria,1MWQI@1224|Proteobacteria,2U5EU@28211|Alphaproteobacteria,3JUDK@41294|Bradyrhizobiaceae	28211|Alphaproteobacteria	E	Belongs to the EutC family	eutC	GO:0003674,GO:0005488,GO:0005575,GO:0005622,GO:0005623,GO:0008144,GO:0009350,GO:0019842,GO:0031419,GO:0032991,GO:0036094,GO:0044424,GO:0044464,GO:0046906,GO:0048037,GO:0097159,GO:1901363,GO:1902494	4.3.1.7	ko:K03736	ko00564,ko01100,map00564,map01100	-	R00749	RC00370	ko00000,ko00001,ko01000	-	-	EutC
RA01000193.1	224911.27351253	0.0	1051.0	COG1032@1|root,COG1032@2|Bacteria,1MY2Y@1224|Proteobacteria,2TUIT@28211|Alphaproteobacteria,3JUXS@41294|Bradyrhizobiaceae	28211|Alphaproteobacteria	C	Domain of unknown function (DUF4070)	MA20_16100	-	-	-	-	-	-	-	-	-	-	B12-binding,DUF4070,Radical_SAM
RA01000194.1	1038862.KB893895_gene7051	1.81e-316	863.0	COG4303@1|root,COG4303@2|Bacteria,1MUR4@1224|Proteobacteria,2TTNA@28211|Alphaproteobacteria,3JSC5@41294|Bradyrhizobiaceae	28211|Alphaproteobacteria	E	Ethanolamine ammonia lyase large subunit (EutB)	MA20_16105	-	4.3.1.7	ko:K03735	ko00564,ko01100,map00564,map01100	-	R00749	RC00370	ko00000,ko00001,ko01000	-	-	EutB
RA01000195.1	335659.S23_50030	1.06e-298	828.0	COG0840@1|root,COG0840@2|Bacteria,1MU9B@1224|Proteobacteria,2TQR7@28211|Alphaproteobacteria,3JTBE@41294|Bradyrhizobiaceae	28211|Alphaproteobacteria	NT	Methyl-accepting chemotaxis-like domains (chemotaxis sensory transducer).	MA20_16110	-	-	ko:K03406	ko02020,ko02030,map02020,map02030	-	-	-	ko00000,ko00001,ko02035	-	-	4HB_MCP_1,HAMP,MCPsignal,sCache_2
RA01000196.1	1037409.BJ6T_28660	9.87e-28	105.0	2BVSM@1|root,2ZFM6@2|Bacteria,1RKNV@1224|Proteobacteria,2UAEZ@28211|Alphaproteobacteria,3JZPD@41294|Bradyrhizobiaceae	28211|Alphaproteobacteria	-	-	-	-	-	-	-	-	-	-	-	-	-	-
RA01000197.1	1037409.BJ6T_67770	4.76e-228	632.0	COG1960@1|root,COG1960@2|Bacteria,1MU2V@1224|Proteobacteria,2TSK3@28211|Alphaproteobacteria,3JSW6@41294|Bradyrhizobiaceae	28211|Alphaproteobacteria	I	Acyl-CoA dehydrogenase, C-terminal domain	MA20_16145	-	1.3.8.7	ko:K00249	ko00071,ko00280,ko00410,ko00640,ko01100,ko01110,ko01130,ko01200,ko01212,ko03320,map00071,map00280,map00410,map00640,map01100,map01110,map01130,map01200,map01212,map03320	M00013,M00036,M00087	R00924,R01175,R01279,R02661,R03172,R03777,R03857,R03990,R04095,R04432,R04751,R04754	RC00052,RC00068,RC00076,RC00095,RC00148,RC00246	ko00000,ko00001,ko00002,ko01000	-	-	Acyl-CoA_dh_1,Acyl-CoA_dh_M,Acyl-CoA_dh_N
RA01000199.1	1038866.KB902768_gene4876	2.51e-280	767.0	COG0683@1|root,COG0683@2|Bacteria,1QESH@1224|Proteobacteria,2U1KX@28211|Alphaproteobacteria,3JW9B@41294|Bradyrhizobiaceae	28211|Alphaproteobacteria	E	Receptor family ligand binding region	MA20_16150	-	-	-	-	-	-	-	-	-	-	Peripla_BP_6
RA01000200.1	335659.S23_50140	5.41e-112	324.0	COG3247@1|root,COG3247@2|Bacteria,1RFIH@1224|Proteobacteria,2U5WE@28211|Alphaproteobacteria,3JTES@41294|Bradyrhizobiaceae	28211|Alphaproteobacteria	S	Short repeat of unknown function (DUF308)	-	-	-	-	-	-	-	-	-	-	-	DUF308
RA01000201.1	1038867.AXAY01000026_gene1433	0.0	942.0	COG0446@1|root,COG2146@1|root,COG0446@2|Bacteria,COG2146@2|Bacteria,1NR3M@1224|Proteobacteria,2TS0K@28211|Alphaproteobacteria,3JVEU@41294|Bradyrhizobiaceae	28211|Alphaproteobacteria	P	Reductase C-terminal	-	-	1.18.1.1	ko:K05297	ko00071,map00071	-	R02000	-	ko00000,ko00001,ko01000	-	-	Pyr_redox_2,Pyr_redox_dim,Reductase_C,Rieske
RA01000202.1	936455.KI421499_gene4294	1.57e-142	402.0	COG0302@1|root,COG0302@2|Bacteria,1MY3N@1224|Proteobacteria,2TSZI@28211|Alphaproteobacteria,3JSQ7@41294|Bradyrhizobiaceae	28211|Alphaproteobacteria	H	GTP cyclohydrolase	folE	-	3.5.4.16	ko:K01495	ko00790,ko01100,map00790,map01100	M00126,M00841,M00842,M00843	R00428,R04639,R05046,R05048	RC00263,RC00294,RC00323,RC00945,RC01188	ko00000,ko00001,ko00002,ko01000	-	-	GTP_cyclohydroI
RA01000203.1	319003.Bra1253DRAFT_02175	6.4e-204	565.0	COG0596@1|root,COG0596@2|Bacteria,1MWT6@1224|Proteobacteria,2TSCE@28211|Alphaproteobacteria,3JUJZ@41294|Bradyrhizobiaceae	28211|Alphaproteobacteria	S	Alpha/beta hydrolase family	-	-	-	-	-	-	-	-	-	-	-	Abhydrolase_1
RA01000204.1	318996.AXAZ01000082_gene3082	8.27e-185	515.0	28IMV@1|root,2Z8NA@2|Bacteria,1R5B6@1224|Proteobacteria,2TRB5@28211|Alphaproteobacteria,3JS02@41294|Bradyrhizobiaceae	28211|Alphaproteobacteria	S	Metal dependent phosphohydrolases with conserved 'HD' motif.	-	-	-	-	-	-	-	-	-	-	-	HD
RA01000205.1	1037409.BJ6T_67840	7.79e-203	562.0	COG1305@1|root,COG1305@2|Bacteria,1MVMI@1224|Proteobacteria,2TRFC@28211|Alphaproteobacteria,3JUN6@41294|Bradyrhizobiaceae	28211|Alphaproteobacteria	E	Transglutaminase/protease-like homologues	-	-	-	-	-	-	-	-	-	-	-	Bact_transglu_N,Transglut_core
RA01000206.1	1037409.BJ6T_67850	0.0	1573.0	COG2307@1|root,COG2308@1|root,COG2307@2|Bacteria,COG2308@2|Bacteria,1MX5P@1224|Proteobacteria,2TRJE@28211|Alphaproteobacteria,3JTPZ@41294|Bradyrhizobiaceae	28211|Alphaproteobacteria	S	Circularly permuted ATP-grasp type 2	MA20_16190	-	-	-	-	-	-	-	-	-	-	Alpha-E,CP_ATPgrasp_2
RA01000207.1	936455.KI421499_gene4299	0.0	2184.0	COG1305@1|root,COG4196@1|root,COG1305@2|Bacteria,COG4196@2|Bacteria,1MVAG@1224|Proteobacteria,2TSVH@28211|Alphaproteobacteria,3JRWJ@41294|Bradyrhizobiaceae	28211|Alphaproteobacteria	E	Putative amidoligase enzyme (DUF2126)	MA20_16195	-	-	-	-	-	-	-	-	-	-	Bact_transglu_N,DUF2126,Transglut_core
RA01000208.1	224911.27351233	3.19e-154	451.0	COG0840@1|root,COG0840@2|Bacteria,1MU9B@1224|Proteobacteria,2U0XK@28211|Alphaproteobacteria,3JVKT@41294|Bradyrhizobiaceae	28211|Alphaproteobacteria	NT	chemotaxis sensory transducer	-	-	-	-	-	-	-	-	-	-	-	MCPsignal
RA01000209.1	1038866.KB902768_gene4866	3.41e-113	325.0	COG3829@1|root,COG3829@2|Bacteria,1NG3B@1224|Proteobacteria,2VF75@28211|Alphaproteobacteria,3K6EE@41294|Bradyrhizobiaceae	28211|Alphaproteobacteria	KT	PAS fold	-	-	-	-	-	-	-	-	-	-	-	PAS,PAS_3
RA01000210.1	1038862.KB893895_gene7068	0.0	1006.0	COG2721@1|root,COG2721@2|Bacteria,1MU9V@1224|Proteobacteria,2TTDT@28211|Alphaproteobacteria,3JT6J@41294|Bradyrhizobiaceae	28211|Alphaproteobacteria	G	D-galactarate dehydratase / Altronate hydrolase, C terminus	MA20_16205	-	4.2.1.7	ko:K01685	ko00040,ko01100,map00040,map01100	M00631	R01540	RC00543	ko00000,ko00001,ko00002,ko01000	-	-	GD_AH_C,SAF
RA01000211.1	1038862.KB893895_gene7069	3.36e-189	525.0	COG3836@1|root,COG3836@2|Bacteria,1MUSG@1224|Proteobacteria,2TT2W@28211|Alphaproteobacteria,3JVT1@41294|Bradyrhizobiaceae	28211|Alphaproteobacteria	G	Belongs to the HpcH HpaI aldolase family	MA20_16210	-	4.1.2.52	ko:K02510	ko00350,ko01120,map00350,map01120	-	R01645,R01647	RC00307,RC00572,RC00574,RC03057	ko00000,ko00001,ko01000	-	-	HpcH_HpaI
RA01000212.1	224911.27351228	2.96e-90	266.0	COG1846@1|root,COG1846@2|Bacteria,1RCY7@1224|Proteobacteria,2UAR3@28211|Alphaproteobacteria,3JV5I@41294|Bradyrhizobiaceae	28211|Alphaproteobacteria	K	helix_turn_helix multiple antibiotic resistance protein	-	-	-	-	-	-	-	-	-	-	-	MarR,MarR_2
RA01000214.1	224911.27351227	1.75e-187	521.0	COG3971@1|root,COG3971@2|Bacteria,1MVVV@1224|Proteobacteria,2TUWC@28211|Alphaproteobacteria,3JTMU@41294|Bradyrhizobiaceae	28211|Alphaproteobacteria	Q	hydratase'	hpaH	-	-	ko:K02509	ko00350,ko01120,map00350,map01120	-	R04132,R06897	RC01615,RC02595	ko00000,ko00001,ko01000	-	-	FAA_hydrolase
RA01000215.1	1038866.KB902768_gene4861	1.13e-89	263.0	COG3232@1|root,COG3232@2|Bacteria,1RB8A@1224|Proteobacteria,2U5N5@28211|Alphaproteobacteria,3JYAP@41294|Bradyrhizobiaceae	28211|Alphaproteobacteria	E	5-carboxymethyl-2-hydroxymuconate isomerase	hpcD	-	5.3.3.10	ko:K01826	ko00350,ko01120,ko01220,map00350,map01120,map01220	M00533	R04379,R04482	RC01141,RC01162	ko00000,ko00001,ko00002,ko01000	-	-	CHMI
RA01000216.1	224911.27351225	0.0	988.0	COG1012@1|root,COG1012@2|Bacteria,1MU1V@1224|Proteobacteria,2TQR1@28211|Alphaproteobacteria,3JVTN@41294|Bradyrhizobiaceae	28211|Alphaproteobacteria	C	belongs to the aldehyde dehydrogenase family	hpaE	-	1.2.1.60,1.2.1.8	ko:K00130,ko:K00151	ko00260,ko00350,ko01100,ko01120,ko01220,map00260,map00350,map01100,map01120,map01220	M00533,M00555	R02565,R02566,R04418	RC00080,RC00254	ko00000,ko00001,ko00002,ko01000	-	-	Aldedh
RA01000217.1	318996.AXAZ01000082_gene3092	1.31e-248	681.0	COG0346@1|root,COG0346@2|Bacteria,1MUWY@1224|Proteobacteria,2TTMJ@28211|Alphaproteobacteria,3JRYD@41294|Bradyrhizobiaceae	28211|Alphaproteobacteria	E	Glyoxalase/Bleomycin resistance protein/Dioxygenase superfamily	MA20_16260	-	1.13.11.2	ko:K00446	ko00361,ko00362,ko00622,ko00643,ko01100,ko01120,ko01220,map00361,map00362,map00622,map00643,map01100,map01120,map01220	M00569	R00816,R04089,R05295,R05404,R05406,R07795	RC00387,RC00643,RC01075,RC01364,RC01914	br01602,ko00000,ko00001,ko00002,ko01000	-	-	Glyoxalase
RA01000218.1	1037409.BJ6T_67990	9.81e-200	554.0	COG0179@1|root,COG0179@2|Bacteria,1MUPF@1224|Proteobacteria,2TQMB@28211|Alphaproteobacteria,3JSMG@41294|Bradyrhizobiaceae	28211|Alphaproteobacteria	Q	Fumarylacetoacetate (FAA) hydrolase family	MA20_16265	-	-	-	-	-	-	-	-	-	-	FAA_hydrolase
RA01000219.1	319003.Bra1253DRAFT_02190	0.0	1023.0	COG0028@1|root,COG0028@2|Bacteria,1MWVW@1224|Proteobacteria,2TTH5@28211|Alphaproteobacteria,3JSVY@41294|Bradyrhizobiaceae	28211|Alphaproteobacteria	EH	Belongs to the TPP enzyme family	ilvB	-	2.2.1.6	ko:K01652	ko00290,ko00650,ko00660,ko00770,ko01100,ko01110,ko01130,ko01210,ko01230,map00290,map00650,map00660,map00770,map01100,map01110,map01130,map01210,map01230	M00019,M00570	R00006,R00014,R00226,R03050,R04672,R04673,R08648	RC00027,RC00106,RC01192,RC02744,RC02893	ko00000,ko00001,ko00002,ko01000	-	-	TPP_enzyme_C,TPP_enzyme_M,TPP_enzyme_N
RA01000220.1	1038862.KB893895_gene7077	2.71e-152	428.0	COG3145@1|root,COG3145@2|Bacteria,1N5HB@1224|Proteobacteria,2U5C6@28211|Alphaproteobacteria,3JRGW@41294|Bradyrhizobiaceae	28211|Alphaproteobacteria	L	2OG-Fe(II) oxygenase superfamily	alkB	-	1.14.11.33	ko:K03919	-	-	-	-	ko00000,ko01000,ko03400	-	-	2OG-FeII_Oxy_2
RA01000221.1	1038862.KB893895_gene7078	4.26e-169	473.0	COG3826@1|root,COG3826@2|Bacteria,1MWVV@1224|Proteobacteria,2TQMH@28211|Alphaproteobacteria,3JQX5@41294|Bradyrhizobiaceae	28211|Alphaproteobacteria	S	Oxygenase, catalysing oxidative methylation of damaged DNA	MA20_16285	-	-	ko:K09990	-	-	-	-	ko00000	-	-	Oxygenase-NA
RA01000222.1	318996.AXAZ01000001_gene4891	5.86e-157	441.0	COG0179@1|root,COG0179@2|Bacteria,1R4GE@1224|Proteobacteria,2TTZ5@28211|Alphaproteobacteria,3JUK2@41294|Bradyrhizobiaceae	28211|Alphaproteobacteria	Q	Protein of unknown function (DUF2848)	MA20_16290	-	-	-	-	-	-	-	-	-	-	DUF2848
RA01000223.1	224911.27351217	5.33e-303	828.0	COG0154@1|root,COG0154@2|Bacteria,1MU51@1224|Proteobacteria,2TSYS@28211|Alphaproteobacteria,3JQW9@41294|Bradyrhizobiaceae	28211|Alphaproteobacteria	J	Amidase	MA20_16295	-	6.3.5.6,6.3.5.7	ko:K02433	ko00970,ko01100,map00970,map01100	-	R03905,R04212	RC00010	ko00000,ko00001,ko01000,ko03029	-	-	Amidase
RA01000224.1	443598.AUFA01000002_gene2658	5.33e-100	290.0	COG1545@1|root,COG1545@2|Bacteria,1R44D@1224|Proteobacteria,2U5BU@28211|Alphaproteobacteria,3JY08@41294|Bradyrhizobiaceae	28211|Alphaproteobacteria	S	Rubredoxin-like zinc ribbon domain (DUF35_N)	MA20_16300	-	-	ko:K07068	-	-	-	-	ko00000	-	-	DUF35_N,OB_aCoA_assoc
RA01000225.1	1304878.AUGD01000006_gene6777	3.25e-273	747.0	COG0183@1|root,COG0183@2|Bacteria,1MUZV@1224|Proteobacteria,2TRHF@28211|Alphaproteobacteria,3JRM3@41294|Bradyrhizobiaceae	28211|Alphaproteobacteria	I	acetyl-coa acetyltransferase	MA20_16305	-	-	-	-	-	-	-	-	-	-	-
RA01000226.1	1126627.BAWE01000004_gene3095	1.72e-212	587.0	COG1028@1|root,COG1028@2|Bacteria,1MXNQ@1224|Proteobacteria,2TS6G@28211|Alphaproteobacteria,3JUD7@41294|Bradyrhizobiaceae	28211|Alphaproteobacteria	IQ	Dehydrogenase	MA20_16310	-	-	-	-	-	-	-	-	-	-	adh_short,adh_short_C2
RA01000227.1	1038866.KB902768_gene4849	1.16e-266	730.0	COG3386@1|root,COG3386@2|Bacteria,1MU0C@1224|Proteobacteria,2TSXG@28211|Alphaproteobacteria,3JTE8@41294|Bradyrhizobiaceae	28211|Alphaproteobacteria	G	SMP-30/Gluconolaconase/LRE-like region	-	-	3.1.1.17	ko:K01053,ko:K14274	ko00030,ko00040,ko00053,ko00930,ko01100,ko01110,ko01120,ko01130,ko01200,ko01220,map00030,map00040,map00053,map00930,map01100,map01110,map01120,map01130,map01200,map01220	M00129	R01519,R02427,R02933,R03751	RC00537,RC00713,RC00983	ko00000,ko00001,ko00002,ko01000,ko04147	-	-	SGL
RA01000228.1	224911.27351212	0.0	1738.0	COG2352@1|root,COG2352@2|Bacteria,1MUD5@1224|Proteobacteria,2TR6F@28211|Alphaproteobacteria,3JR8U@41294|Bradyrhizobiaceae	28211|Alphaproteobacteria	C	Forms oxaloacetate, a four-carbon dicarboxylic acid source for the tricarboxylic acid cycle	ppc	GO:0003674,GO:0003824,GO:0004611,GO:0005575,GO:0005622,GO:0005623,GO:0005737,GO:0005829,GO:0008964,GO:0016829,GO:0016830,GO:0016831,GO:0044424,GO:0044444,GO:0044464	4.1.1.31	ko:K01595	ko00620,ko00680,ko00710,ko00720,ko01100,ko01120,ko01200,map00620,map00680,map00710,map00720,map01100,map01120,map01200	M00168,M00170,M00171,M00172,M00173,M00346,M00374	R00345	RC02741	ko00000,ko00001,ko00002,ko01000	-	-	PEPcase
RA01000229.1	1038862.KB893851_gene6293	0.0	1318.0	COG0683@1|root,COG0683@2|Bacteria,1R6QM@1224|Proteobacteria,2U0C6@28211|Alphaproteobacteria,3JXJB@41294|Bradyrhizobiaceae	28211|Alphaproteobacteria	E	Receptor family ligand binding region	-	-	-	-	-	-	-	-	-	-	-	Peripla_BP_6
RA01000230.1	936455.KI421499_gene4322	1.26e-87	258.0	COG3304@1|root,COG3304@2|Bacteria,1RA96@1224|Proteobacteria,2U742@28211|Alphaproteobacteria,3JYSW@41294|Bradyrhizobiaceae	28211|Alphaproteobacteria	S	Inner membrane component domain	MA20_16325	-	-	-	-	-	-	-	-	-	-	YccF
RA01000231.1	1037409.BJ6T_68120	2.54e-230	637.0	COG0705@1|root,COG0705@2|Bacteria,1RGJE@1224|Proteobacteria,2U23W@28211|Alphaproteobacteria,3JV4P@41294|Bradyrhizobiaceae	28211|Alphaproteobacteria	S	Rhomboid family	-	-	3.4.21.105	ko:K19225	-	-	-	-	ko00000,ko01000,ko01002	-	-	Rhomboid
RA01000232.1	1038862.KB893895_gene7088	0.0	995.0	COG0318@1|root,COG0318@2|Bacteria,1MUIC@1224|Proteobacteria,2TRRZ@28211|Alphaproteobacteria,3JTP6@41294|Bradyrhizobiaceae	28211|Alphaproteobacteria	IQ	AMP-binding enzyme C-terminal domain	MA20_16340	-	6.2.1.3	ko:K01897	ko00061,ko00071,ko01100,ko01212,ko02024,ko03320,ko04146,ko04216,ko04714,ko04920,map00061,map00071,map01100,map01212,map02024,map03320,map04146,map04216,map04714,map04920	M00086	R01280	RC00004,RC00014	ko00000,ko00001,ko00002,ko01000,ko01004,ko04147	4.C.1.1	-	AMP-binding,AMP-binding_C
RA01000233.1	1038867.AXAY01000026_gene1459	8.27e-182	507.0	COG1024@1|root,COG1024@2|Bacteria,1PJ4R@1224|Proteobacteria,2TSSU@28211|Alphaproteobacteria,3JTWK@41294|Bradyrhizobiaceae	28211|Alphaproteobacteria	I	Belongs to the enoyl-CoA hydratase isomerase family	MA20_16345	-	-	-	-	-	-	-	-	-	-	ECH_1
RA01000234.1	1038862.KB893895_gene7090	1.07e-208	577.0	COG1028@1|root,COG1028@2|Bacteria,1PFUB@1224|Proteobacteria,2U149@28211|Alphaproteobacteria,3JTNK@41294|Bradyrhizobiaceae	28211|Alphaproteobacteria	IQ	KR domain	MA20_16350	-	-	-	-	-	-	-	-	-	-	adh_short_C2
RA01000235.1	1304877.KI519399_gene4094	0.0	1022.0	COG0318@1|root,COG0318@2|Bacteria,1MU6G@1224|Proteobacteria,2TR2W@28211|Alphaproteobacteria,3JS0G@41294|Bradyrhizobiaceae	28211|Alphaproteobacteria	IQ	AMP-binding enzyme C-terminal domain	MA20_16355	-	6.2.1.3	ko:K00666,ko:K01897	ko00061,ko00071,ko01100,ko01212,ko02024,ko03320,ko04146,ko04216,ko04714,ko04920,map00061,map00071,map01100,map01212,map02024,map03320,map04146,map04216,map04714,map04920	M00086	R01280	RC00004,RC00014	ko00000,ko00001,ko00002,ko01000,ko01004,ko04147	4.C.1.1	-	AMP-binding,AMP-binding_C
RA01000236.1	1037409.BJ6T_68180	0.0	871.0	COG1960@1|root,COG1960@2|Bacteria,1MWUU@1224|Proteobacteria,2TT47@28211|Alphaproteobacteria,3JS9P@41294|Bradyrhizobiaceae	28211|Alphaproteobacteria	I	acyl-CoA dehydrogenase	MA20_16360	-	1.3.8.1,1.3.8.7	ko:K00248,ko:K00249	ko00071,ko00280,ko00410,ko00640,ko00650,ko01100,ko01110,ko01120,ko01130,ko01200,ko01212,ko03320,map00071,map00280,map00410,map00640,map00650,map01100,map01110,map01120,map01130,map01200,map01212,map03320	M00013,M00036,M00087	R00924,R01175,R01178,R01279,R02661,R03172,R03777,R03857,R03990,R04095,R04432,R04751,R04754	RC00052,RC00068,RC00076,RC00095,RC00120,RC00148,RC00246	ko00000,ko00001,ko00002,ko01000	-	-	Acyl-CoA_dh_1,Acyl-CoA_dh_M,Acyl-CoA_dh_N
RA01000237.1	319003.Bra1253DRAFT_02212	6.34e-181	504.0	COG1024@1|root,COG1024@2|Bacteria,1MWZC@1224|Proteobacteria,2TRIH@28211|Alphaproteobacteria,3JRFJ@41294|Bradyrhizobiaceae	28211|Alphaproteobacteria	I	Belongs to the enoyl-CoA hydratase isomerase family	MA20_16365	-	4.2.1.149	ko:K08299	-	-	R10675	RC01095	ko00000,ko01000	-	-	ECH_1
RA01000239.1	318996.AXAZ01000001_gene4873	7.22e-76	227.0	2DRHM@1|root,32UR4@2|Bacteria,1RCYI@1224|Proteobacteria,2UAAG@28211|Alphaproteobacteria,3JYQT@41294|Bradyrhizobiaceae	28211|Alphaproteobacteria	-	-	-	-	-	-	-	-	-	-	-	-	-	-
RA01000240.1	224911.27351201	2.3e-229	632.0	COG3173@1|root,COG3173@2|Bacteria,1MY0Y@1224|Proteobacteria,2TRMW@28211|Alphaproteobacteria,3JSBA@41294|Bradyrhizobiaceae	28211|Alphaproteobacteria	S	Phosphotransferase enzyme family	MA20_16375	-	-	-	-	-	-	-	-	-	-	APH
RA01000241.1	1038866.KB902768_gene4835	4.68e-189	525.0	COG1024@1|root,COG1024@2|Bacteria,1MVQN@1224|Proteobacteria,2TUXD@28211|Alphaproteobacteria,3JSP8@41294|Bradyrhizobiaceae	28211|Alphaproteobacteria	I	enoyl-CoA hydratase	MA20_16380	-	5.3.3.18	ko:K15866	ko00360,ko01120,map00360,map01120	-	R09837,R09839	RC00004,RC00326,RC02689,RC03003	ko00000,ko00001,ko01000	-	-	ECH_1
RA01000242.1	1037409.BJ6T_68230	1.05e-179	501.0	COG1028@1|root,COG1028@2|Bacteria,1MWGK@1224|Proteobacteria,2TVQ8@28211|Alphaproteobacteria,3JQVW@41294|Bradyrhizobiaceae	28211|Alphaproteobacteria	IQ	NAD dependent epimerase/dehydratase family	MA20_16385	-	1.1.1.69	ko:K00046	-	-	-	-	ko00000,ko01000	-	-	adh_short_C2
RA01000243.1	1126627.BAWE01000004_gene3079	1.91e-85	251.0	COG0346@1|root,COG0346@2|Bacteria,1RH8G@1224|Proteobacteria,2U9BR@28211|Alphaproteobacteria,3JYZN@41294|Bradyrhizobiaceae	28211|Alphaproteobacteria	E	COG0346 Lactoylglutathione lyase and related lyases	-	-	-	-	-	-	-	-	-	-	-	Glyoxalase
RA01000244.1	936455.KI421499_gene4335	0.0	865.0	COG1960@1|root,COG1960@2|Bacteria,1MU2V@1224|Proteobacteria,2TSK3@28211|Alphaproteobacteria,3JR07@41294|Bradyrhizobiaceae	28211|Alphaproteobacteria	I	Acyl-CoA dehydrogenase, C-terminal domain	MA20_16395	-	1.3.8.7	ko:K00249	ko00071,ko00280,ko00410,ko00640,ko01100,ko01110,ko01130,ko01200,ko01212,ko03320,map00071,map00280,map00410,map00640,map01100,map01110,map01130,map01200,map01212,map03320	M00013,M00036,M00087	R00924,R01175,R01279,R02661,R03172,R03777,R03857,R03990,R04095,R04432,R04751,R04754	RC00052,RC00068,RC00076,RC00095,RC00148,RC00246	ko00000,ko00001,ko00002,ko01000	-	-	Acyl-CoA_dh_1,Acyl-CoA_dh_M,Acyl-CoA_dh_N
RA01000245.1	319003.Bra1253DRAFT_02221	2.55e-213	588.0	COG0625@1|root,COG0625@2|Bacteria,1MUN3@1224|Proteobacteria,2TTDF@28211|Alphaproteobacteria,3JTWQ@41294|Bradyrhizobiaceae	28211|Alphaproteobacteria	O	Glutathione S-transferase, C-terminal domain	MA20_16405	-	-	ko:K11209	-	-	-	-	ko00000,ko01000	-	-	GST_C,GST_C_2,GST_N
RA01000246.1	1038866.KB902768_gene4829	3.88e-264	724.0	COG2070@1|root,COG2070@2|Bacteria,1MU2F@1224|Proteobacteria,2TRM9@28211|Alphaproteobacteria,3JU1G@41294|Bradyrhizobiaceae	28211|Alphaproteobacteria	S	Nitronate monooxygenase	MA20_16415	-	-	-	-	-	-	-	-	-	-	NMO
RA01000247.1	318996.AXAZ01000001_gene4865	0.0	957.0	COG0183@1|root,COG0183@2|Bacteria,1QUU1@1224|Proteobacteria,2U0EW@28211|Alphaproteobacteria,3JR6T@41294|Bradyrhizobiaceae	28211|Alphaproteobacteria	I	Belongs to the thiolase family	MA20_16420	-	2.3.1.9	ko:K00626	ko00071,ko00072,ko00280,ko00310,ko00362,ko00380,ko00620,ko00630,ko00640,ko00650,ko00720,ko00900,ko01100,ko01110,ko01120,ko01130,ko01200,ko01212,ko02020,map00071,map00072,map00280,map00310,map00362,map00380,map00620,map00630,map00640,map00650,map00720,map00900,map01100,map01110,map01120,map01130,map01200,map01212,map02020	M00088,M00095,M00373,M00374,M00375	R00238,R01177	RC00004,RC00326	ko00000,ko00001,ko00002,ko01000,ko04147	-	-	-
RA01000248.1	443598.AUFA01000002_gene2636	5.27e-264	726.0	COG0845@1|root,COG0845@2|Bacteria,1NQZ0@1224|Proteobacteria,2U105@28211|Alphaproteobacteria,3JUK0@41294|Bradyrhizobiaceae	28211|Alphaproteobacteria	M	Biotin-lipoyl like	-	-	-	-	-	-	-	-	-	-	-	HlyD_D23
RA01000249.1	443598.AUFA01000002_gene2635	0.0	1986.0	COG0841@1|root,COG0841@2|Bacteria,1MU48@1224|Proteobacteria,2TQT0@28211|Alphaproteobacteria,3JTRG@41294|Bradyrhizobiaceae	28211|Alphaproteobacteria	V	Belongs to the resistance-nodulation-cell division (RND) (TC 2.A.6) family	-	-	-	-	-	-	-	-	-	-	-	ACR_tran
RA01000250.1	1304877.KI519399_gene4079	5.08e-278	775.0	COG0840@1|root,COG3829@1|root,COG0840@2|Bacteria,COG3829@2|Bacteria,1MU9B@1224|Proteobacteria,2TSBF@28211|Alphaproteobacteria,3JR3J@41294|Bradyrhizobiaceae	28211|Alphaproteobacteria	T	Methyl-accepting chemotaxis-like domains (chemotaxis sensory transducer).	aer	-	-	ko:K03406,ko:K03776	ko02020,ko02030,map02020,map02030	-	-	-	ko00000,ko00001,ko02035	-	-	4HB_MCP_1,HAMP,MCPsignal,PAS_3,PilZ,TarH
RA01000251.1	224911.27351189	0.0	1137.0	COG0840@1|root,COG3850@1|root,COG0840@2|Bacteria,COG3850@2|Bacteria,1MU9B@1224|Proteobacteria,2TQR7@28211|Alphaproteobacteria,3JTE9@41294|Bradyrhizobiaceae	28211|Alphaproteobacteria	NT	Cache domain	-	-	-	ko:K03406	ko02020,ko02030,map02020,map02030	-	-	-	ko00000,ko00001,ko02035	-	-	HAMP,MCPsignal,dCache_1
RA01000252.1	1038862.KB893895_gene7106	5.24e-282	785.0	COG0840@1|root,COG0840@2|Bacteria,1MU9B@1224|Proteobacteria,2TQR7@28211|Alphaproteobacteria,3JVHV@41294|Bradyrhizobiaceae	28211|Alphaproteobacteria	NT	Tar ligand binding domain homologue	-	-	-	ko:K03406	ko02020,ko02030,map02020,map02030	-	-	-	ko00000,ko00001,ko02035	-	-	4HB_MCP_1,MCPsignal
RA01000253.1	319003.Bra1253DRAFT_02228	5.4e-255	705.0	COG3395@1|root,COG3395@2|Bacteria,1MW4G@1224|Proteobacteria,2TS85@28211|Alphaproteobacteria,3JT3V@41294|Bradyrhizobiaceae	28211|Alphaproteobacteria	S	Putative sugar-binding N-terminal domain	-	-	2.7.1.217	ko:K21948	-	-	R11706,R11707	-	ko00000,ko01000	-	-	DUF1357_C,DUF1537
RA01000254.1	335659.S23_50860	6.17e-193	534.0	COG3622@1|root,COG3622@2|Bacteria,1MV53@1224|Proteobacteria,2TSVI@28211|Alphaproteobacteria,3JQMJ@41294|Bradyrhizobiaceae	28211|Alphaproteobacteria	G	Belongs to the hyi family	MA20_16445	-	5.3.1.22,5.3.1.35	ko:K01816,ko:K22131	ko00630,ko01100,map00630,map01100	-	R01394	RC00511	ko00000,ko00001,ko01000	-	-	AP_endonuc_2
RA01000255.1	318996.AXAZ01000001_gene4859	8.23e-196	545.0	COG2084@1|root,COG2084@2|Bacteria,1MUD0@1224|Proteobacteria,2TT7P@28211|Alphaproteobacteria,3JT85@41294|Bradyrhizobiaceae	28211|Alphaproteobacteria	I	NAD-binding of NADP-dependent 3-hydroxyisobutyrate dehydrogenase	MA20_16450	-	1.1.1.411	ko:K08319	-	-	-	-	ko00000,ko01000	-	-	NAD_binding_11,NAD_binding_2
RA01000256.1	1038862.KB893895_gene7110	1.33e-156	439.0	COG0235@1|root,COG0235@2|Bacteria,1MW7B@1224|Proteobacteria,2TSX7@28211|Alphaproteobacteria,3JUIT@41294|Bradyrhizobiaceae	28211|Alphaproteobacteria	G	Class II Aldolase and Adducin N-terminal domain	MA20_16455	-	4.1.1.104	ko:K22130	-	-	-	-	ko00000,ko01000	-	-	Aldolase_II
RA01000257.1	936455.KI421499_gene4348	7.63e-156	438.0	COG0410@1|root,COG0410@2|Bacteria,1MUGR@1224|Proteobacteria,2VEZK@28211|Alphaproteobacteria,3JRXP@41294|Bradyrhizobiaceae	28211|Alphaproteobacteria	E	Branched-chain amino acid ATP-binding cassette transporter	MA20_16460	-	-	ko:K01996	ko02010,ko02024,map02010,map02024	M00237	-	-	ko00000,ko00001,ko00002,ko02000	3.A.1.4	-	ABC_tran,BCA_ABC_TP_C
RA01000258.1	224911.27351182	3.48e-161	452.0	COG0411@1|root,COG0411@2|Bacteria,1MUFT@1224|Proteobacteria,2U22X@28211|Alphaproteobacteria,3JRTA@41294|Bradyrhizobiaceae	28211|Alphaproteobacteria	E	Branched-chain amino acid ATP-binding cassette transporter	MA20_16465	-	-	ko:K01995	ko02010,ko02024,map02010,map02024	M00237	-	-	ko00000,ko00001,ko00002,ko02000	3.A.1.4	-	ABC_tran,BCA_ABC_TP_C
RA01000259.1	1038867.AXAY01000001_gene6233	2.38e-226	624.0	COG4177@1|root,COG4177@2|Bacteria,1MU52@1224|Proteobacteria,2TSUI@28211|Alphaproteobacteria,3JUMZ@41294|Bradyrhizobiaceae	28211|Alphaproteobacteria	E	Belongs to the binding-protein-dependent transport system permease family	-	-	-	ko:K01998	ko02010,ko02024,map02010,map02024	M00237	-	-	ko00000,ko00001,ko00002,ko02000	3.A.1.4	-	BPD_transp_2
RA01000260.1	936455.KI421499_gene4351	2.54e-180	504.0	COG0559@1|root,COG0559@2|Bacteria,1N5XH@1224|Proteobacteria,2TSH5@28211|Alphaproteobacteria,3JS0U@41294|Bradyrhizobiaceae	28211|Alphaproteobacteria	E	Belongs to the binding-protein-dependent transport system permease family	MA20_16475	-	-	ko:K01997	ko02010,ko02024,map02010,map02024	M00237	-	-	ko00000,ko00001,ko00002,ko02000	3.A.1.4	-	BPD_transp_2
RA01000261.1	224911.27351179	4.81e-291	796.0	COG0683@1|root,COG0683@2|Bacteria,1MWQB@1224|Proteobacteria,2U0KM@28211|Alphaproteobacteria,3JT54@41294|Bradyrhizobiaceae	28211|Alphaproteobacteria	E	Receptor family ligand binding region	MA20_16480	-	-	ko:K01999	ko02010,ko02024,map02010,map02024	M00237	-	-	ko00000,ko00001,ko00002,ko02000	3.A.1.4	-	Peripla_BP_6
RA01000262.1	319003.Bra1253DRAFT_02237	1.57e-196	544.0	COG4336@1|root,COG4336@2|Bacteria,1MW52@1224|Proteobacteria,2TST8@28211|Alphaproteobacteria,3JS4D@41294|Bradyrhizobiaceae	28211|Alphaproteobacteria	S	Belongs to the D-glutamate cyclase family	MA20_16485	-	-	-	-	-	-	-	-	-	-	DUF1445
RA01000263.1	1038862.KB893895_gene7118	1.63e-206	572.0	COG0583@1|root,COG0583@2|Bacteria,1QU1H@1224|Proteobacteria,2U0TE@28211|Alphaproteobacteria,3JSUK@41294|Bradyrhizobiaceae	28211|Alphaproteobacteria	K	LysR substrate binding domain	MA20_16490	-	-	-	-	-	-	-	-	-	-	HTH_1,LysR_substrate
RA01000264.1	936455.KI421499_gene4355	2.92e-297	811.0	COG0624@1|root,COG0624@2|Bacteria,1MVUX@1224|Proteobacteria,2TR5X@28211|Alphaproteobacteria,3JRW2@41294|Bradyrhizobiaceae	28211|Alphaproteobacteria	E	Peptidase family M20/M25/M40	MA20_16495	-	3.5.1.6,3.5.1.87	ko:K06016	ko00240,ko01100,map00240,map01100	M00046	R00905,R04666	RC00096	ko00000,ko00001,ko00002,ko01000	-	-	M20_dimer,Peptidase_M20,Peptidase_M28
RA01000265.1	1038867.AXAY01000001_gene6239	5.69e-206	571.0	COG0111@1|root,COG0111@2|Bacteria,1NU4B@1224|Proteobacteria,2TSC4@28211|Alphaproteobacteria,3JUK8@41294|Bradyrhizobiaceae	28211|Alphaproteobacteria	EH	D-isomer specific 2-hydroxyacid dehydrogenase, NAD binding domain	MA20_16500	-	1.1.1.399,1.1.1.95	ko:K00058	ko00260,ko00680,ko01100,ko01120,ko01130,ko01200,ko01230,map00260,map00680,map01100,map01120,map01130,map01200,map01230	M00020	R01513	RC00031	ko00000,ko00001,ko00002,ko01000,ko04147	-	-	2-Hacid_dh,2-Hacid_dh_C
RA01000266.1	443598.AUFA01000002_gene2620	1.12e-246	678.0	COG2055@1|root,COG2055@2|Bacteria,1MWQY@1224|Proteobacteria,2TR37@28211|Alphaproteobacteria,3JT0K@41294|Bradyrhizobiaceae	28211|Alphaproteobacteria	C	Belongs to the LDH2 MDH2 oxidoreductase family	MA20_16505	-	1.1.1.350	ko:K00073,ko:K13574	ko00230,ko01120,map00230,map01120	-	R02935,R02936	RC00169	ko00000,ko00001,ko01000	-	-	Ldh_2
RA01000267.1	1038862.KB893895_gene7122	3.51e-137	389.0	2EMUA@1|root,33FGN@2|Bacteria,1R7BJ@1224|Proteobacteria,2U45P@28211|Alphaproteobacteria,3JVNH@41294|Bradyrhizobiaceae	28211|Alphaproteobacteria	S	Suppressor of fused protein (SUFU)	-	-	-	-	-	-	-	-	-	-	-	SUFU
RA01000268.1	224911.27351173	3.09e-269	735.0	COG0473@1|root,COG0473@2|Bacteria,1MUH4@1224|Proteobacteria,2TSBB@28211|Alphaproteobacteria,3JTGC@41294|Bradyrhizobiaceae	28211|Alphaproteobacteria	CE	Isocitrate/isopropylmalate dehydrogenase	MA20_16515	-	1.1.1.83,1.1.1.93,4.1.1.73	ko:K07246	ko00630,ko00650,map00630,map00650	-	R00215,R01751,R02545,R06180	RC00084,RC00105,RC00594	ko00000,ko00001,ko01000	-	-	Iso_dh
RA01000269.1	1037409.BJ6T_68510	1.27e-175	490.0	COG4221@1|root,COG4221@2|Bacteria,1QW75@1224|Proteobacteria,2TWQR@28211|Alphaproteobacteria,3JTEM@41294|Bradyrhizobiaceae	28211|Alphaproteobacteria	S	KR domain	MA20_16520	-	-	-	-	-	-	-	-	-	-	adh_short_C2
RA01000270.1	936455.KI421499_gene4361	0.0	900.0	COG0154@1|root,COG0154@2|Bacteria,1MW3Z@1224|Proteobacteria,2TS56@28211|Alphaproteobacteria,3JS92@41294|Bradyrhizobiaceae	28211|Alphaproteobacteria	J	Amidase	MA20_16525	-	3.5.1.4	ko:K01426	ko00330,ko00360,ko00380,ko00627,ko00643,ko01120,map00330,map00360,map00380,map00627,map00643,map01120	-	R02540,R03096,R03180,R03909,R05551,R05590	RC00010,RC00100,RC00950,RC01025	ko00000,ko00001,ko01000	-	-	Amidase
RA01000271.1	936455.KI421499_gene4362	8.33e-34	117.0	2AQ5U@1|root,31FBB@2|Bacteria,1P3J2@1224|Proteobacteria,2UVMB@28211|Alphaproteobacteria,3K4RH@41294|Bradyrhizobiaceae	28211|Alphaproteobacteria	-	-	-	-	-	-	-	-	-	-	-	-	-	-
RA01000272.1	936455.KI421499_gene4363	1.27e-249	687.0	COG0765@1|root,COG0765@2|Bacteria,1MV3I@1224|Proteobacteria,2TR9C@28211|Alphaproteobacteria,3JRVD@41294|Bradyrhizobiaceae	28211|Alphaproteobacteria	E	Binding-protein-dependent transport system inner membrane component	aapM	-	-	ko:K09971	ko02010,map02010	M00232	-	-	ko00000,ko00001,ko00002,ko02000	3.A.1.3.18,3.A.1.3.7,3.A.1.3.8	-	BPD_transp_1
RA01000273.1	936455.KI421499_gene4364	1.26e-253	699.0	COG4597@1|root,COG4597@2|Bacteria,1MV0S@1224|Proteobacteria,2TR7G@28211|Alphaproteobacteria,3JTDW@41294|Bradyrhizobiaceae	28211|Alphaproteobacteria	E	Binding-protein-dependent transport system inner membrane component	-	-	-	ko:K09970	ko02010,map02010	M00232	-	-	ko00000,ko00001,ko00002,ko02000	3.A.1.3.18,3.A.1.3.7,3.A.1.3.8	-	BPD_transp_1
RA01000274.1	318996.AXAZ01000001_gene4839	1.93e-186	520.0	COG1737@1|root,COG1737@2|Bacteria,1MW2B@1224|Proteobacteria,2U0K3@28211|Alphaproteobacteria,3JUSJ@41294|Bradyrhizobiaceae	28211|Alphaproteobacteria	K	SIS domain	-	-	-	-	-	-	-	-	-	-	-	HTH_6,SIS
RA01000275.1	1038866.KB902768_gene4802	2.47e-308	842.0	COG0161@1|root,COG0161@2|Bacteria,1MU2N@1224|Proteobacteria,2TQND@28211|Alphaproteobacteria,3JTP1@41294|Bradyrhizobiaceae	28211|Alphaproteobacteria	H	Aminotransferase class-III	-	-	-	-	-	-	-	-	-	-	-	Aminotran_3
RA01000276.1	1038862.KB893895_gene7131	2.24e-238	655.0	COG0834@1|root,COG0834@2|Bacteria,1MV5D@1224|Proteobacteria,2TX27@28211|Alphaproteobacteria,3JUJE@41294|Bradyrhizobiaceae	28211|Alphaproteobacteria	ET	Bacterial periplasmic substrate-binding proteins	-	-	-	ko:K09969	ko02010,map02010	M00232	-	-	ko00000,ko00001,ko00002,ko02000	3.A.1.3.18,3.A.1.3.7,3.A.1.3.8	-	SBP_bac_3
RA01000277.1	318996.AXAZ01000001_gene4836	1.04e-135	386.0	COG4126@1|root,COG4126@2|Bacteria,1MWVG@1224|Proteobacteria,2U0MW@28211|Alphaproteobacteria,3JS11@41294|Bradyrhizobiaceae	28211|Alphaproteobacteria	E	Asp Glu hydantoin racemase	MA20_16560	-	-	-	-	-	-	-	-	-	-	-
RA01000278.1	1037409.BJ6T_68590	5.1e-131	374.0	COG1309@1|root,COG1309@2|Bacteria,1NJ0Y@1224|Proteobacteria,2TVAJ@28211|Alphaproteobacteria,3JRD1@41294|Bradyrhizobiaceae	28211|Alphaproteobacteria	K	WHG domain	MA20_16565	-	-	-	-	-	-	-	-	-	-	TetR_N,WHG
RA01000279.1	1038862.KB893895_gene7134	1.42e-47	151.0	COG1141@1|root,COG1141@2|Bacteria,1MZJU@1224|Proteobacteria,2UCKK@28211|Alphaproteobacteria,3K07G@41294|Bradyrhizobiaceae	28211|Alphaproteobacteria	C	4Fe-4S single cluster domain of Ferredoxin I	MA20_16570	-	-	ko:K05337	-	-	-	-	ko00000	-	-	Fer4_15
RA01000280.1	1037409.BJ6T_68610	5.13e-286	782.0	COG2124@1|root,COG2124@2|Bacteria,1MY5H@1224|Proteobacteria,2TR6X@28211|Alphaproteobacteria,3JU3Z@41294|Bradyrhizobiaceae	28211|Alphaproteobacteria	Q	Cytochrome P450	MA20_16575	-	-	-	-	-	-	-	-	-	-	p450
RA01000281.1	1038866.KB902768_gene4796	3.36e-306	836.0	COG0477@1|root,COG0477@2|Bacteria,1MVZG@1224|Proteobacteria,2TRS1@28211|Alphaproteobacteria,3JRAC@41294|Bradyrhizobiaceae	28211|Alphaproteobacteria	EGP	Sugar (and other) transporter	kgtP	-	-	ko:K03761	-	-	-	-	ko00000,ko02000	2.A.1.6.2	-	Sugar_tr
RA01000282.1	318996.AXAZ01000001_gene4831	2.33e-163	456.0	COG2041@1|root,COG2041@2|Bacteria,1MWZK@1224|Proteobacteria,2TTCH@28211|Alphaproteobacteria,3JUNV@41294|Bradyrhizobiaceae	28211|Alphaproteobacteria	S	Oxidoreductase molybdopterin binding domain	yuiH	-	-	-	-	-	-	-	-	-	-	Oxidored_molyb
RA01000283.1	1038862.KB893895_gene7138	2.82e-279	765.0	COG1073@1|root,COG1765@1|root,COG1073@2|Bacteria,COG1765@2|Bacteria,1N2BT@1224|Proteobacteria,2TQN7@28211|Alphaproteobacteria,3JQSS@41294|Bradyrhizobiaceae	28211|Alphaproteobacteria	O	OsmC-like protein	MA20_16590	-	-	ko:K06889,ko:K07397	-	-	-	-	ko00000	-	-	Hydrolase_4,OsmC
RA01000284.1	335659.S23_51140	1.93e-295	812.0	COG1167@1|root,COG1167@2|Bacteria,1MVGT@1224|Proteobacteria,2TRK7@28211|Alphaproteobacteria,3JRN2@41294|Bradyrhizobiaceae	28211|Alphaproteobacteria	EK	Bacterial regulatory proteins, gntR family	-	-	-	ko:K00375	-	-	-	-	ko00000,ko03000	-	-	Aminotran_1_2,GntR
RA01000285.1	1038862.KB893895_gene7140	1.76e-189	529.0	COG0697@1|root,COG0697@2|Bacteria,1P38S@1224|Proteobacteria,2U1BY@28211|Alphaproteobacteria,3JR3W@41294|Bradyrhizobiaceae	28211|Alphaproteobacteria	EG	EamA-like transporter family	-	-	-	-	-	-	-	-	-	-	-	EamA
RA01000286.1	1038862.KB893895_gene7141	9.54e-213	592.0	COG2391@1|root,COG2391@2|Bacteria,1MXSE@1224|Proteobacteria,2TRUQ@28211|Alphaproteobacteria,3JS3X@41294|Bradyrhizobiaceae	28211|Alphaproteobacteria	S	Sulphur transport	-	-	-	ko:K07112	-	-	-	-	ko00000	-	-	Sulf_transp
RA01000287.1	1038862.KB893895_gene7142	3.44e-218	604.0	COG0604@1|root,COG0604@2|Bacteria,1MXZ9@1224|Proteobacteria,2TUS6@28211|Alphaproteobacteria,3JRKP@41294|Bradyrhizobiaceae	28211|Alphaproteobacteria	C	Zinc-binding dehydrogenase	MA20_16610	-	-	-	-	-	-	-	-	-	-	ADH_zinc_N
RA01000288.1	936455.KI421499_gene4379	0.0	875.0	COG1541@1|root,COG1541@2|Bacteria,1MV1W@1224|Proteobacteria,2TRVF@28211|Alphaproteobacteria,3JTWB@41294|Bradyrhizobiaceae	28211|Alphaproteobacteria	H	Catalyzes the activation of phenylacetic acid (PA) to phenylacetyl-CoA (PA-CoA)	paaF	-	6.2.1.30	ko:K01912	ko00360,ko01120,ko05111,map00360,map01120,map05111	-	R02539	RC00004,RC00014	ko00000,ko00001,ko01000	-	-	AMP-binding,AMP-binding_C_2
RA01000289.1	443598.AUFA01000002_gene2599	6.41e-100	290.0	COG2050@1|root,COG2050@2|Bacteria,1RH35@1224|Proteobacteria,2U5QW@28211|Alphaproteobacteria,3JV3S@41294|Bradyrhizobiaceae	28211|Alphaproteobacteria	Q	Thioesterase superfamily	paaI	-	-	ko:K02614	ko00360,map00360	-	R09840	RC00004,RC00014	ko00000,ko00001,ko01000	-	-	4HBT
RA01000290.1	1037409.BJ6T_68710	3.7e-258	707.0	COG1018@1|root,COG1018@2|Bacteria,1MY2Q@1224|Proteobacteria,2U0WY@28211|Alphaproteobacteria,3JTD7@41294|Bradyrhizobiaceae	28211|Alphaproteobacteria	C	Oxidoreductase FAD-binding domain	paaE	-	-	ko:K02613	ko00360,ko01120,map00360,map01120	-	R09838	RC02690	ko00000,ko00001	-	-	FAD_binding_6,Fer2,NAD_binding_1
RA01000291.1	1037409.BJ6T_68720	1.08e-113	326.0	COG2151@1|root,COG2151@2|Bacteria,1RF3S@1224|Proteobacteria,2TRQW@28211|Alphaproteobacteria,3JSNZ@41294|Bradyrhizobiaceae	28211|Alphaproteobacteria	S	Iron-sulfur cluster assembly protein	paaD	-	-	ko:K02612	ko00360,ko01120,map00360,map01120	-	R09838	RC02690	ko00000,ko00001	-	-	FeS_assembly_P
RA01000292.1	1037409.BJ6T_68730	7.99e-179	498.0	COG3396@1|root,COG3396@2|Bacteria,1MVYQ@1224|Proteobacteria,2TRYF@28211|Alphaproteobacteria,3JUK9@41294|Bradyrhizobiaceae	28211|Alphaproteobacteria	S	Phenylacetic acid catabolic protein	paaC	-	1.14.13.149	ko:K02611	ko00360,ko01120,map00360,map01120	-	R09838	RC02690	ko00000,ko00001,ko01000	-	-	PaaA_PaaC
RA01000293.1	1038867.AXAY01000001_gene6264	8.97e-65	197.0	COG3460@1|root,COG3460@2|Bacteria,1RHM5@1224|Proteobacteria,2U9HF@28211|Alphaproteobacteria,3JZFH@41294|Bradyrhizobiaceae	28211|Alphaproteobacteria	Q	phenylacetic acid degradation	paaB	-	-	ko:K02610	ko00360,ko01120,map00360,map01120	-	R09838	RC02690	ko00000,ko00001	-	-	PaaB
RA01000294.1	936455.KI421499_gene4385	1.47e-242	665.0	COG3396@1|root,COG3396@2|Bacteria,1MVQ7@1224|Proteobacteria,2TTC4@28211|Alphaproteobacteria,3JTGS@41294|Bradyrhizobiaceae	28211|Alphaproteobacteria	S	Phenylacetic acid catabolic protein	paaA	-	1.14.13.149	ko:K02609	ko00360,ko01120,map00360,map01120	-	R09838	RC02690	ko00000,ko00001,ko01000	-	-	PaaA_PaaC
RA01000295.1	335659.S23_51250	1.03e-205	569.0	COG3327@1|root,COG3327@2|Bacteria,1R4IF@1224|Proteobacteria,2TS3A@28211|Alphaproteobacteria,3JU2C@41294|Bradyrhizobiaceae	28211|Alphaproteobacteria	K	phenylacetic acid degradation operon negative regulatory protein PaaX	paaX	-	-	ko:K02616	-	-	-	-	ko00000,ko03000	-	-	PaaX,PaaX_C
RA01000296.1	1037409.BJ6T_68770	9.06e-184	511.0	COG1075@1|root,COG1075@2|Bacteria,1NJNA@1224|Proteobacteria,2TSQC@28211|Alphaproteobacteria,3JV19@41294|Bradyrhizobiaceae	28211|Alphaproteobacteria	S	Alpha beta hydrolase	MA20_16655	-	-	-	-	-	-	-	-	-	-	Abhydrolase_1,Abhydrolase_6,DUF676,Hydrolase_4
RA01000297.1	1038867.AXAY01000001_gene6268	1.32e-290	795.0	COG2733@1|root,COG2733@2|Bacteria,1MX3G@1224|Proteobacteria,2U15J@28211|Alphaproteobacteria,3JSYM@41294|Bradyrhizobiaceae	28211|Alphaproteobacteria	S	Protein of unknown function (DUF445)	MA20_16660	-	-	-	-	-	-	-	-	-	-	DUF445
RA01000298.1	1038867.AXAY01000001_gene6269	4.34e-94	275.0	COG5490@1|root,COG5490@2|Bacteria,1MUUM@1224|Proteobacteria,2U1GB@28211|Alphaproteobacteria,3JQTT@41294|Bradyrhizobiaceae	28211|Alphaproteobacteria	S	Phasin protein	MA20_16665	-	-	-	-	-	-	-	-	-	-	Phasin_2
RA01000299.1	1037409.BJ6T_68800	2.73e-133	378.0	COG1247@1|root,COG1247@2|Bacteria,1R6UW@1224|Proteobacteria,2U09H@28211|Alphaproteobacteria,3JQVX@41294|Bradyrhizobiaceae	28211|Alphaproteobacteria	M	Acetyltransferase (GNAT) domain	MA20_16670	-	-	-	-	-	-	-	-	-	-	Acetyltransf_1
RA01000300.1	224911.27351142	3.59e-265	725.0	COG3243@1|root,COG3243@2|Bacteria,1MU68@1224|Proteobacteria,2VFW2@28211|Alphaproteobacteria,3JTF9@41294|Bradyrhizobiaceae	28211|Alphaproteobacteria	I	Poly-beta-hydroxybutyrate polymerase (PhaC) N-terminus	MA20_16675	-	-	ko:K03821	ko00650,map00650	-	R04254	RC00004	ko00000,ko00001,ko01000	-	-	Abhydrolase_1,PhaC_N
RA01000301.1	1304877.KI519399_gene4038	1.9e-72	219.0	2DSEU@1|root,33FV9@2|Bacteria,1RG4E@1224|Proteobacteria,2U66H@28211|Alphaproteobacteria,3JYBR@41294|Bradyrhizobiaceae	28211|Alphaproteobacteria	S	polyhydroxyalkanoic acid synthase, PhaR subunit	-	-	-	-	-	-	-	-	-	-	-	PHA_synth_III_E
RA01000302.1	1038866.KB902768_gene4775	7.14e-197	548.0	COG2267@1|root,COG2267@2|Bacteria,1R41P@1224|Proteobacteria,2TRY2@28211|Alphaproteobacteria,3JSW4@41294|Bradyrhizobiaceae	28211|Alphaproteobacteria	I	Serine aminopeptidase, S33	MA20_16685	-	-	-	-	-	-	-	-	-	-	Abhydrolase_1,Abhydrolase_4
RA01000303.1	319003.Bra1253DRAFT_02276	1.09e-93	275.0	COG4922@1|root,COG4922@2|Bacteria,1RDM5@1224|Proteobacteria,2UG54@28211|Alphaproteobacteria,3JY4A@41294|Bradyrhizobiaceae	28211|Alphaproteobacteria	S	SnoaL-like polyketide cyclase	-	-	-	-	-	-	-	-	-	-	-	SnoaL,SnoaL_2
RA01000304.1	1037409.BJ6T_68850	3.75e-142	403.0	COG4262@1|root,COG4262@2|Bacteria,1P1G3@1224|Proteobacteria,2TQSR@28211|Alphaproteobacteria,3JSYK@41294|Bradyrhizobiaceae	28211|Alphaproteobacteria	S	Spermidine synthase	MA20_16695	-	2.5.1.16	ko:K00797	ko00270,ko00330,ko00410,ko00480,ko01100,map00270,map00330,map00410,map00480,map01100	M00034,M00133	R01920,R02869,R08359	RC00021,RC00053	ko00000,ko00001,ko00002,ko01000	-	-	Spermine_synth
RA01000305.1	1037409.BJ6T_68860	0.0	2107.0	COG0369@1|root,COG2124@1|root,COG0369@2|Bacteria,COG2124@2|Bacteria,1MV75@1224|Proteobacteria,2TSV7@28211|Alphaproteobacteria,3JUN7@41294|Bradyrhizobiaceae	28211|Alphaproteobacteria	PQ	Flavodoxin	MA20_16700	-	1.14.14.1,1.6.2.4	ko:K14338	ko00071,ko00380,ko00627,ko01120,map00071,map00380,map00627,map01120	-	R03629,R04121,R05259	RC00046,RC01311	ko00000,ko00001,ko00199,ko01000	-	-	FAD_binding_1,Flavodoxin_1,NAD_binding_1,p450
RA01000306.1	443598.AUFA01000002_gene2582	6.2e-237	651.0	COG0596@1|root,COG0596@2|Bacteria,1N5ZI@1224|Proteobacteria,2TS7X@28211|Alphaproteobacteria,3JTQ9@41294|Bradyrhizobiaceae	28211|Alphaproteobacteria	S	Serine aminopeptidase, S33	-	-	2.7.10.2,3.3.2.9	ko:K01253,ko:K08253	ko00980,ko04976,ko05204,map00980,map04976,map05204	-	R07013,R07014,R07027,R07071,R07072,R07082,R09410,R09417,R09443	RC01447,RC01728,RC01764,RC02528	ko00000,ko00001,ko01000,ko01002	-	-	Abhydrolase_1
RA01000307.1	1304877.KI519399_gene4033	0.0	996.0	COG1020@1|root,COG1020@2|Bacteria,1N7HY@1224|Proteobacteria,2TRZV@28211|Alphaproteobacteria,3JSC2@41294|Bradyrhizobiaceae	28211|Alphaproteobacteria	Q	Protein of unknown function (DUF1298)	MA20_16710	-	-	-	-	-	-	-	-	-	-	DUF1298,WES_acyltransf
RA01000308.1	224911.27351136	6.45e-173	484.0	COG1075@1|root,COG1075@2|Bacteria,1NJNA@1224|Proteobacteria,2TSQC@28211|Alphaproteobacteria,3JSU2@41294|Bradyrhizobiaceae	28211|Alphaproteobacteria	S	Alpha beta hydrolase	MA20_16715	-	-	-	-	-	-	-	-	-	-	Abhydrolase_6,Lipase_2
RA01000309.1	318996.AXAZ01000001_gene4805	6.01e-54	169.0	COG3266@1|root,COG3266@2|Bacteria,1NC0S@1224|Proteobacteria,2UG0A@28211|Alphaproteobacteria,3JZDG@41294|Bradyrhizobiaceae	28211|Alphaproteobacteria	S	domain, Protein	-	-	-	-	-	-	-	-	-	-	-	-
RA01000310.1	224911.27351134	0.0	1023.0	COG0747@1|root,COG0747@2|Bacteria,1MUZH@1224|Proteobacteria,2TQQH@28211|Alphaproteobacteria,3JVSR@41294|Bradyrhizobiaceae	28211|Alphaproteobacteria	E	Bacterial extracellular solute-binding proteins, family 5 Middle	-	-	-	ko:K02035	ko02024,map02024	M00239	-	-	ko00000,ko00001,ko00002,ko02000	3.A.1.5	-	SBP_bac_5
RA01000311.1	1304878.AUGD01000007_gene5709	1.7e-214	594.0	COG0601@1|root,COG0601@2|Bacteria,1MU8Z@1224|Proteobacteria,2TR3F@28211|Alphaproteobacteria,3JR08@41294|Bradyrhizobiaceae	28211|Alphaproteobacteria	EP	Binding-protein-dependent transport system inner membrane component	-	-	-	ko:K02033	ko02024,map02024	M00239	-	-	ko00000,ko00001,ko00002,ko02000	3.A.1.5	-	BPD_transp_1
RA01000312.1	1038862.KB893895_gene7167	1.55e-208	579.0	COG1173@1|root,COG1173@2|Bacteria,1MUG0@1224|Proteobacteria,2TT4V@28211|Alphaproteobacteria,3JRP6@41294|Bradyrhizobiaceae	28211|Alphaproteobacteria	EP	N-terminal TM domain of oligopeptide transport permease C	-	-	-	ko:K02034	ko02024,map02024	M00239	-	-	ko00000,ko00001,ko00002,ko02000	3.A.1.5	-	BPD_transp_1,OppC_N
RA01000313.1	1038866.KB902768_gene4765	8.02e-230	633.0	COG0444@1|root,COG0444@2|Bacteria,1R4KB@1224|Proteobacteria,2TR0J@28211|Alphaproteobacteria,3JRIW@41294|Bradyrhizobiaceae	28211|Alphaproteobacteria	EP	Oligopeptide/dipeptide transporter, C-terminal region	MA20_16740	-	-	ko:K02031	ko02024,map02024	M00239	-	-	ko00000,ko00001,ko00002,ko02000	3.A.1.5	-	ABC_tran,oligo_HPY
RA01000314.1	318996.AXAZ01000001_gene4800	4.01e-235	647.0	COG4608@1|root,COG4608@2|Bacteria,1NU4K@1224|Proteobacteria,2TQTV@28211|Alphaproteobacteria,3JT4D@41294|Bradyrhizobiaceae	28211|Alphaproteobacteria	E	Belongs to the ABC transporter superfamily	MA20_16745	-	-	ko:K02032	ko02024,map02024	M00239	-	-	ko00000,ko00001,ko00002,ko02000	3.A.1.5	-	ABC_tran,oligo_HPY
RA01000315.1	936455.KI421499_gene4406	0.0	1215.0	COG0405@1|root,COG0405@2|Bacteria,1MUV6@1224|Proteobacteria,2TSME@28211|Alphaproteobacteria,3JQSX@41294|Bradyrhizobiaceae	28211|Alphaproteobacteria	E	Gamma-glutamyltranspeptidase	MA20_16750	-	2.3.2.2,3.4.19.13	ko:K00681	ko00430,ko00460,ko00480,ko01100,map00430,map00460,map00480,map01100	-	R00494,R01262,R01687,R03867,R03916,R03970,R03971,R04935	RC00064,RC00090,RC00096	ko00000,ko00001,ko01000,ko01002	-	-	G_glu_transpept
RA01000316.1	1126627.BAWE01000004_gene3011	1.28e-164	461.0	COG3342@1|root,COG3342@2|Bacteria,1MWQT@1224|Proteobacteria,2TRJZ@28211|Alphaproteobacteria,3JU3P@41294|Bradyrhizobiaceae	28211|Alphaproteobacteria	S	Family of unknown function (DUF1028)	MA20_16755	-	-	-	-	-	-	-	-	-	-	DUF1028
RA01000317.1	1038866.KB902768_gene4761	2.78e-226	624.0	COG0444@1|root,COG0444@2|Bacteria,1R4KB@1224|Proteobacteria,2TR0J@28211|Alphaproteobacteria,3JSG0@41294|Bradyrhizobiaceae	28211|Alphaproteobacteria	EP	Belongs to the ABC transporter superfamily	MA20_16760	-	-	ko:K02031	ko02024,map02024	M00239	-	-	ko00000,ko00001,ko00002,ko02000	3.A.1.5	-	ABC_tran,oligo_HPY
RA01000318.1	1038866.KB902768_gene4760	8.07e-241	664.0	COG4608@1|root,COG4608@2|Bacteria,1NU4K@1224|Proteobacteria,2TQTV@28211|Alphaproteobacteria,3JRYC@41294|Bradyrhizobiaceae	28211|Alphaproteobacteria	E	Belongs to the ABC transporter superfamily	-	-	-	ko:K02032,ko:K10823	ko01501,ko02010,ko02024,map01501,map02010,map02024	M00239,M00439	-	-	ko00000,ko00001,ko00002,ko02000	3.A.1.5,3.A.1.5.1,3.A.1.5.18,3.A.1.5.19,3.A.1.5.25	-	ABC_tran,oligo_HPY
RA01000319.1	1038866.KB902768_gene4759	0.0	957.0	COG0747@1|root,COG0747@2|Bacteria,1MUZH@1224|Proteobacteria,2TR1D@28211|Alphaproteobacteria,3JS99@41294|Bradyrhizobiaceae	28211|Alphaproteobacteria	E	Bacterial extracellular solute-binding proteins, family 5 Middle	-	-	-	ko:K02035	ko02024,map02024	M00239	-	-	ko00000,ko00001,ko00002,ko02000	3.A.1.5	-	SBP_bac_5
RA01000320.1	1038867.AXAY01000001_gene6290	1.99e-211	585.0	COG0601@1|root,COG0601@2|Bacteria,1MU8Z@1224|Proteobacteria,2TR0N@28211|Alphaproteobacteria,3JUIB@41294|Bradyrhizobiaceae	28211|Alphaproteobacteria	EP	Binding-protein-dependent transport system inner membrane component	MA20_16775	-	-	ko:K02033	ko02024,map02024	M00239	-	-	ko00000,ko00001,ko00002,ko02000	3.A.1.5	-	BPD_transp_1
RA01000321.1	936455.KI421499_gene4412	3.03e-183	513.0	COG1173@1|root,COG1173@2|Bacteria,1MUG0@1224|Proteobacteria,2VETJ@28211|Alphaproteobacteria,3JRE7@41294|Bradyrhizobiaceae	28211|Alphaproteobacteria	EP	N-terminal TM domain of oligopeptide transport permease C	MA20_16780	-	-	ko:K02034	ko02024,map02024	M00239	-	-	ko00000,ko00001,ko00002,ko02000	3.A.1.5	-	BPD_transp_1,OppC_N
RA01000322.1	1038862.KB893895_gene7177	1.83e-179	499.0	COG0251@1|root,COG0251@2|Bacteria,1N1B6@1224|Proteobacteria,2TZWE@28211|Alphaproteobacteria,3JRZG@41294|Bradyrhizobiaceae	28211|Alphaproteobacteria	J	oxidation-reduction process	MA20_16785	-	-	-	-	-	-	-	-	-	-	-
RA01000323.1	936455.KI421499_gene4414	1.62e-278	764.0	COG2114@1|root,COG4753@1|root,COG2114@2|Bacteria,COG4753@2|Bacteria,1PYP4@1224|Proteobacteria,2TVEP@28211|Alphaproteobacteria,3JVII@41294|Bradyrhizobiaceae	28211|Alphaproteobacteria	T	Adenylyl- / guanylyl cyclase, catalytic domain	-	-	4.6.1.1	ko:K01768	ko00230,ko02025,ko04113,ko04213,map00230,map02025,map04113,map04213	M00695	R00089,R00434	RC00295	ko00000,ko00001,ko00002,ko01000	-	-	Guanylate_cyc,Response_reg
RA01000324.1	319003.Bra1253DRAFT_02299	6.6e-83	245.0	COG0745@1|root,COG0745@2|Bacteria,1RBCR@1224|Proteobacteria,2U9JF@28211|Alphaproteobacteria,3JYAE@41294|Bradyrhizobiaceae	28211|Alphaproteobacteria	KT	cheY-homologous receiver domain	MA20_16795	-	-	-	-	-	-	-	-	-	-	Response_reg
RA01000325.1	936455.KI421499_gene4416	0.0	1474.0	COG2203@1|root,COG4191@1|root,COG5002@1|root,COG2203@2|Bacteria,COG4191@2|Bacteria,COG5002@2|Bacteria,1RCM9@1224|Proteobacteria,2TTJ0@28211|Alphaproteobacteria,3K6MV@41294|Bradyrhizobiaceae	28211|Alphaproteobacteria	T	Cache domain	-	-	-	-	-	-	-	-	-	-	-	GAF,GAF_2,HAMP,HATPase_c,HisKA,dCache_1
RA01000326.1	936455.KI421499_gene4417	0.0	1882.0	COG0841@1|root,COG0841@2|Bacteria,1MU48@1224|Proteobacteria,2TQT0@28211|Alphaproteobacteria,3JRYN@41294|Bradyrhizobiaceae	28211|Alphaproteobacteria	V	Belongs to the resistance-nodulation-cell division (RND) (TC 2.A.6) family	MA20_16805	-	-	ko:K18138,ko:K18307	ko01501,ko01503,ko02024,map01501,map01503,map02024	M00644,M00647,M00699,M00718	-	-	ko00000,ko00001,ko00002,ko01504,ko02000	2.A.6.2,2.A.6.2.20,2.A.6.2.32	-	ACR_tran
RA01000327.1	224911.27351117	2.1e-270	743.0	COG0845@1|root,COG0845@2|Bacteria,1MUFW@1224|Proteobacteria,2U2CU@28211|Alphaproteobacteria,3JQRQ@41294|Bradyrhizobiaceae	28211|Alphaproteobacteria	M	Belongs to the membrane fusion protein (MFP) (TC 8.A.1) family	MA20_16810	-	-	ko:K18306	ko02024,map02024	M00644	-	-	ko00000,ko00001,ko00002,ko02000	2.A.6.2.20,2.A.6.2.32,8.A.1	-	HlyD_D23
RA01000328.1	1038866.KB902768_gene4750	1.12e-145	412.0	COG1309@1|root,COG1309@2|Bacteria,1MUE2@1224|Proteobacteria,2TT72@28211|Alphaproteobacteria,3JU93@41294|Bradyrhizobiaceae	28211|Alphaproteobacteria	K	Bacterial regulatory proteins, tetR family	MA20_16815	-	-	-	-	-	-	-	-	-	-	TetR_N
RA01000329.1	224911.27351115	2.15e-125	358.0	COG0028@1|root,COG0028@2|Bacteria,1R6QP@1224|Proteobacteria,2TXAJ@28211|Alphaproteobacteria,3JUDG@41294|Bradyrhizobiaceae	28211|Alphaproteobacteria	EH	Thiamine pyrophosphate enzyme, C-terminal TPP binding domain	MA20_16820	-	-	-	-	-	-	-	-	-	-	TPP_enzyme_C
RA01000330.1	1037409.BJ6T_69110	4.98e-118	338.0	COG4032@1|root,COG4032@2|Bacteria,1P0HU@1224|Proteobacteria,2TRJ2@28211|Alphaproteobacteria,3JQMU@41294|Bradyrhizobiaceae	28211|Alphaproteobacteria	S	Thiamine pyrophosphate enzyme, N-terminal TPP binding domain	MA20_16825	-	4.1.1.79	ko:K06034	ko00680,ko01120,map00680,map01120	M00358	R05774	RC00506	ko00000,ko00001,ko00002,ko01000	-	-	TPP_enzyme_N
RA01000331.1	224911.27351113	3.85e-282	772.0	COG2124@1|root,COG2124@2|Bacteria,1MY5H@1224|Proteobacteria,2TTRR@28211|Alphaproteobacteria,3JVM6@41294|Bradyrhizobiaceae	28211|Alphaproteobacteria	Q	Cytochrome P450	MA20_16830	-	-	-	-	-	-	-	-	-	-	p450
RA01000332.1	936455.KI421499_gene4423	1.6e-288	788.0	COG4992@1|root,COG4992@2|Bacteria,1MV3C@1224|Proteobacteria,2TSGT@28211|Alphaproteobacteria,3JS3D@41294|Bradyrhizobiaceae	28211|Alphaproteobacteria	E	Aminotransferase class-III	rocD	GO:0003674,GO:0005488,GO:0005515,GO:0008144,GO:0019842,GO:0030170,GO:0036094,GO:0042802,GO:0043167,GO:0043168,GO:0048037,GO:0050662,GO:0070279,GO:0097159,GO:1901363	2.6.1.11,2.6.1.13,2.6.1.17	ko:K00819,ko:K00821	ko00220,ko00300,ko00330,ko01100,ko01110,ko01120,ko01130,ko01210,ko01230,map00220,map00300,map00330,map01100,map01110,map01120,map01130,map01210,map01230	M00016,M00028,M00845	R00667,R02283,R04475	RC00006,RC00062	ko00000,ko00001,ko00002,ko01000,ko01007	-	-	Aminotran_3
RA01000334.1	1037409.BJ6T_69160	1.28e-225	640.0	COG1570@1|root,COG1570@2|Bacteria,1PC49@1224|Proteobacteria,2TU8Y@28211|Alphaproteobacteria,3JTSP@41294|Bradyrhizobiaceae	28211|Alphaproteobacteria	L	LTXXQ motif family protein	-	-	-	-	-	-	-	-	-	-	-	LTXXQ
RA01000335.1	1038859.AXAU01000001_gene3782	2.95e-212	589.0	COG0180@1|root,COG0180@2|Bacteria,1MV4T@1224|Proteobacteria,2U1G8@28211|Alphaproteobacteria,3K30G@41294|Bradyrhizobiaceae	28211|Alphaproteobacteria	J	tRNA synthetases class I (W and Y)	trpS_2	-	6.1.1.2	ko:K01867	ko00970,map00970	M00359,M00360	R03664	RC00055,RC00523	ko00000,ko00001,ko00002,ko01000,ko01007,ko03016	-	-	tRNA-synt_1b
RA01000336.1	224911.27351105	0.0	1048.0	COG0659@1|root,COG0659@2|Bacteria,1MWDF@1224|Proteobacteria,2TT0G@28211|Alphaproteobacteria,3JVT8@41294|Bradyrhizobiaceae	28211|Alphaproteobacteria	P	Sulfate permease family	-	-	-	-	-	-	-	-	-	-	-	STAS,Sulfate_transp
RA01000337.1	936455.KI421499_gene4430	5.51e-205	567.0	COG1082@1|root,COG1082@2|Bacteria,1Q173@1224|Proteobacteria,2TTFM@28211|Alphaproteobacteria,3JRMB@41294|Bradyrhizobiaceae	28211|Alphaproteobacteria	G	Xylose isomerase-like TIM barrel	MA20_16875	-	-	-	-	-	-	-	-	-	-	AP_endonuc_2
RA01000338.1	1038866.KB902768_gene4743	3.99e-278	761.0	COG0329@1|root,COG0329@2|Bacteria,1MV7E@1224|Proteobacteria,2TTT5@28211|Alphaproteobacteria,3JUG4@41294|Bradyrhizobiaceae	28211|Alphaproteobacteria	EM	Protein of unknown function (DUF993)	MA20_16880	-	-	-	-	-	-	-	-	-	-	DUF993
RA01000339.1	1304878.AUGD01000007_gene5691	1.2e-286	781.0	COG0673@1|root,COG0673@2|Bacteria,1PYTN@1224|Proteobacteria,2TS0G@28211|Alphaproteobacteria,3JQM5@41294|Bradyrhizobiaceae	28211|Alphaproteobacteria	S	Oxidoreductase family, NAD-binding Rossmann fold	MA20_16885	-	-	-	-	-	-	-	-	-	-	GFO_IDH_MocA,GFO_IDH_MocA_C
RA01000340.1	1038862.KB893895_gene7197	2.46e-307	841.0	COG4948@1|root,COG4948@2|Bacteria,1MV2S@1224|Proteobacteria,2TTFB@28211|Alphaproteobacteria,3JTFN@41294|Bradyrhizobiaceae	28211|Alphaproteobacteria	M	Mandelate Racemase Muconate Lactonizing	-	-	-	-	-	-	-	-	-	-	-	MR_MLE_C
RA01000341.1	319003.Bra1253DRAFT_02313	8.69e-195	541.0	COG1116@1|root,COG1116@2|Bacteria,1MUIM@1224|Proteobacteria,2TRHM@28211|Alphaproteobacteria,3JUE4@41294|Bradyrhizobiaceae	28211|Alphaproteobacteria	P	ATPases associated with a variety of cellular activities	MA20_16895	-	-	ko:K02049	-	M00188	-	-	ko00000,ko00002,ko02000	3.A.1.16,3.A.1.17	-	ABC_tran
RA01000342.1	319003.Bra1253DRAFT_02314	1.07e-219	608.0	COG0715@1|root,COG0715@2|Bacteria,1MVRA@1224|Proteobacteria,2VF1U@28211|Alphaproteobacteria,3JSBZ@41294|Bradyrhizobiaceae	28211|Alphaproteobacteria	P	NMT1/THI5 like	MA20_16900	-	-	ko:K02051	-	M00188	-	-	ko00000,ko00002,ko02000	3.A.1.16,3.A.1.17	-	NMT1
RA01000343.1	318996.AXAZ01000001_gene4770	1.6e-179	501.0	COG0600@1|root,COG0600@2|Bacteria,1MVAE@1224|Proteobacteria,2VF1T@28211|Alphaproteobacteria,3JUMS@41294|Bradyrhizobiaceae	28211|Alphaproteobacteria	P	Binding-protein-dependent transport system inner membrane component	MA20_16905	-	-	ko:K02050	-	M00188	-	-	ko00000,ko00002,ko02000	3.A.1.16,3.A.1.17	-	BPD_transp_1
RA01000344.1	1037409.BJ6T_69270	1.06e-157	444.0	COG1309@1|root,COG1309@2|Bacteria,1R5AI@1224|Proteobacteria,2U7HG@28211|Alphaproteobacteria,3JTCA@41294|Bradyrhizobiaceae	28211|Alphaproteobacteria	K	Bacterial regulatory proteins, tetR family	MA20_16910	-	-	ko:K09017	-	-	-	-	ko00000,ko03000	-	-	TetR_C_3,TetR_C_9,TetR_N
RA01000345.1	224911.27351091	3.32e-190	532.0	COG0346@1|root,COG0346@2|Bacteria,1MXZ4@1224|Proteobacteria,2TUBZ@28211|Alphaproteobacteria,3JR1S@41294|Bradyrhizobiaceae	28211|Alphaproteobacteria	E	Glyoxalase-like domain	MA20_16915	-	-	-	-	-	-	-	-	-	-	Glyoxalase,Glyoxalase_3,Glyoxalase_4
RA01000346.1	1038867.AXAY01000001_gene6314	5.2e-224	616.0	COG0524@1|root,COG0524@2|Bacteria,1PB7X@1224|Proteobacteria,2U0Y2@28211|Alphaproteobacteria,3JT7W@41294|Bradyrhizobiaceae	28211|Alphaproteobacteria	G	belongs to the carbohydrate kinase PfkB family	MA20_16920	-	-	-	-	-	-	-	-	-	-	PfkB
RA01000347.1	318996.AXAZ01000001_gene4766	1.57e-175	494.0	COG0524@1|root,COG0524@2|Bacteria,1MV5B@1224|Proteobacteria,2TSUM@28211|Alphaproteobacteria,3JSQX@41294|Bradyrhizobiaceae	28211|Alphaproteobacteria	G	Catalyzes the phosphorylation of ribose at O-5 in a reaction requiring ATP and magnesium. The resulting D-ribose-5- phosphate can then be used either for sythesis of nucleotides, histidine, and tryptophan, or as a component of the pentose phosphate pathway	rbsK	-	2.7.1.15	ko:K00852	ko00030,map00030	-	R01051,R02750	RC00002,RC00017	ko00000,ko00001,ko01000	-	-	PfkB
RA01000348.1	1038867.AXAY01000001_gene6316	8.33e-276	756.0	COG0446@1|root,COG0446@2|Bacteria,1NR3M@1224|Proteobacteria,2TS0K@28211|Alphaproteobacteria,3JURU@41294|Bradyrhizobiaceae	28211|Alphaproteobacteria	S	Reductase C-terminal	MA20_16930	-	1.18.1.3	ko:K00529	ko00071,ko00360,ko01120,ko01220,map00071,map00360,map01120,map01220	M00545	R02000,R06782,R06783	RC00098	br01602,ko00000,ko00001,ko00002,ko01000	-	-	Pyr_redox_2,Reductase_C
RA01000349.1	1038862.KB893895_gene7206	2.16e-170	478.0	COG1024@1|root,COG1024@2|Bacteria,1NQM5@1224|Proteobacteria,2TSP1@28211|Alphaproteobacteria,3JUF6@41294|Bradyrhizobiaceae	28211|Alphaproteobacteria	I	Enoyl-CoA hydratase/isomerase	MA20_16935	-	5.3.3.18	ko:K15866	ko00360,ko01120,map00360,map01120	-	R09837,R09839	RC00004,RC00326,RC02689,RC03003	ko00000,ko00001,ko01000	-	-	ECH_1
RA01000350.1	1037409.BJ6T_69340	9.5e-300	820.0	COG1593@1|root,COG1593@2|Bacteria,1MU0F@1224|Proteobacteria,2TQW5@28211|Alphaproteobacteria,3JT73@41294|Bradyrhizobiaceae	28211|Alphaproteobacteria	G	Tripartite ATP-independent periplasmic transporter, DctM component	-	-	-	-	-	-	-	-	-	-	-	DctM
RA01000351.1	224911.27351085	4.93e-129	367.0	COG3090@1|root,COG3090@2|Bacteria,1PR3S@1224|Proteobacteria,2U0AG@28211|Alphaproteobacteria,3JVM2@41294|Bradyrhizobiaceae	28211|Alphaproteobacteria	G	Tripartite ATP-independent periplasmic transporters, DctQ component	-	-	-	-	-	-	-	-	-	-	-	DctQ
RA01000352.1	936455.KI421499_gene4446	3.36e-220	609.0	COG1638@1|root,COG1638@2|Bacteria,1P6X1@1224|Proteobacteria,2TRTU@28211|Alphaproteobacteria,3JTDG@41294|Bradyrhizobiaceae	28211|Alphaproteobacteria	G	Bacterial extracellular solute-binding protein, family 7	-	-	-	-	-	-	-	-	-	-	-	DctP
RA01000353.1	936455.KI421499_gene4447	0.0	1102.0	COG0129@1|root,COG0129@2|Bacteria,1MV4I@1224|Proteobacteria,2TQRW@28211|Alphaproteobacteria,3JT1Q@41294|Bradyrhizobiaceae	28211|Alphaproteobacteria	EG	Belongs to the IlvD Edd family	MA20_16960	-	4.2.1.9	ko:K01687	ko00290,ko00770,ko01100,ko01110,ko01130,ko01210,ko01230,map00290,map00770,map01100,map01110,map01130,map01210,map01230	M00019,M00570	R01209,R04441,R05070	RC00468,RC01714	ko00000,ko00001,ko00002,ko01000	-	-	ILVD_EDD
RA01000354.1	1038862.KB893895_gene7212	5.59e-150	423.0	COG1802@1|root,COG1802@2|Bacteria,1MXNB@1224|Proteobacteria,2TUI3@28211|Alphaproteobacteria,3JT57@41294|Bradyrhizobiaceae	28211|Alphaproteobacteria	K	FCD	-	-	-	-	-	-	-	-	-	-	-	FCD,GntR
RA01000355.1	224911.27351081	4.68e-192	536.0	2BR2I@1|root,32K0A@2|Bacteria,1NCF5@1224|Proteobacteria,2U3Z7@28211|Alphaproteobacteria,3JQNQ@41294|Bradyrhizobiaceae	28211|Alphaproteobacteria	-	-	-	-	-	-	-	-	-	-	-	-	-	-
RA01000356.1	936455.KI421499_gene4449	9.49e-74	223.0	29ZWP@1|root,30MY1@2|Bacteria,1RFTI@1224|Proteobacteria,2U7Y5@28211|Alphaproteobacteria,3JYY7@41294|Bradyrhizobiaceae	28211|Alphaproteobacteria	-	-	-	-	-	-	-	-	-	-	-	-	-	-
RA01000357.1	224911.27351077	3.33e-116	338.0	2A69I@1|root,30V25@2|Bacteria,1R6Y6@1224|Proteobacteria,2U36D@28211|Alphaproteobacteria,3JXYT@41294|Bradyrhizobiaceae	28211|Alphaproteobacteria	-	-	-	-	-	-	-	-	-	-	-	-	-	-
RA01000358.1	319003.Bra1253DRAFT_02331	4.92e-206	568.0	COG0451@1|root,COG0451@2|Bacteria,1MWVE@1224|Proteobacteria,2TS8F@28211|Alphaproteobacteria,3JU8F@41294|Bradyrhizobiaceae	28211|Alphaproteobacteria	GM	3-beta hydroxysteroid dehydrogenase/isomerase family	MA20_16995	-	1.1.1.203	ko:K18981	ko00053,map00053	-	R10841	RC00066	ko00000,ko00001,ko01000	-	-	Epimerase
RA01000359.1	224911.27351074	3.74e-241	661.0	COG3386@1|root,COG3386@2|Bacteria,1MU0C@1224|Proteobacteria,2TSXG@28211|Alphaproteobacteria,3JV1I@41294|Bradyrhizobiaceae	28211|Alphaproteobacteria	G	SMP-30/Gluconolaconase/LRE-like region	-	-	3.1.1.17	ko:K01053,ko:K14274	ko00030,ko00040,ko00053,ko00930,ko01100,ko01110,ko01120,ko01130,ko01200,ko01220,map00030,map00040,map00053,map00930,map01100,map01110,map01120,map01130,map01200,map01220	M00129	R01519,R02427,R02933,R03751	RC00537,RC00713,RC00983	ko00000,ko00001,ko00002,ko01000,ko04147	-	-	SGL
RA01000360.1	224911.27351073	0.0	926.0	COG1012@1|root,COG1012@2|Bacteria,1MU1V@1224|Proteobacteria,2TQR1@28211|Alphaproteobacteria,3JQU8@41294|Bradyrhizobiaceae	28211|Alphaproteobacteria	C	Aldehyde dehydrogenase family	MA20_17005	-	1.2.1.3	ko:K00128	ko00010,ko00053,ko00071,ko00280,ko00310,ko00330,ko00340,ko00380,ko00410,ko00561,ko00620,ko00625,ko00903,ko00981,ko01100,ko01110,ko01120,ko01130,map00010,map00053,map00071,map00280,map00310,map00330,map00340,map00380,map00410,map00561,map00620,map00625,map00903,map00981,map01100,map01110,map01120,map01130	M00135	R00264,R00631,R00710,R00904,R01752,R01986,R02549,R02678,R02940,R02957,R03283,R03869,R04065,R04506,R04903,R05050,R05237,R05238,R05286,R06366,R08146	RC00047,RC00071,RC00080,RC00186,RC00218,RC00242,RC00816,RC01500	ko00000,ko00001,ko00002,ko01000	-	-	Aldedh
RA01000361.1	1304877.KI519399_gene3984	0.0	1551.0	COG2609@1|root,COG2609@2|Bacteria,1MV21@1224|Proteobacteria,2TSZ9@28211|Alphaproteobacteria,3JRFU@41294|Bradyrhizobiaceae	28211|Alphaproteobacteria	C	Component of the pyruvate dehydrogenase (PDH) complex, that catalyzes the overall conversion of pyruvate to acetyl-CoA and CO(2)	MA20_17010	-	1.2.4.1	ko:K00163	ko00010,ko00020,ko00620,ko01100,ko01110,ko01120,ko01130,ko01200,map00010,map00020,map00620,map01100,map01110,map01120,map01130,map01200	M00307	R00014,R00209,R01699,R03270	RC00004,RC00027,RC00627,RC02742,RC02744,RC02882	br01601,ko00000,ko00001,ko00002,ko01000	-	-	Transketolase_N
RA01000362.1	936455.KI421499_gene4459	8.08e-100	290.0	COG1522@1|root,COG1522@2|Bacteria,1MX7R@1224|Proteobacteria,2VG6E@28211|Alphaproteobacteria,3JSFH@41294|Bradyrhizobiaceae	28211|Alphaproteobacteria	K	helix_turn_helix ASNC type	MA20_17015	-	-	ko:K03719	-	-	-	-	ko00000,ko03000,ko03036	-	-	AsnC_trans_reg,HTH_24
RA01000363.1	1038867.AXAY01000001_gene6328	2e-212	587.0	COG2326@1|root,COG2326@2|Bacteria,1MVE2@1224|Proteobacteria,2TSU8@28211|Alphaproteobacteria,3JRKK@41294|Bradyrhizobiaceae	28211|Alphaproteobacteria	S	Polyphosphate kinase 2 (PPK2)	MA20_17020	GO:0003674,GO:0003824,GO:0006793,GO:0006796,GO:0008150,GO:0008152,GO:0008976,GO:0009987,GO:0016301,GO:0016310,GO:0016740,GO:0016772,GO:0016776,GO:0044237	2.7.4.1	ko:K22468	ko00190,ko03018,map00190,map03018	-	-	-	ko00000,ko00001,ko01000,ko03019	-	-	PPK2
RA01000364.1	319003.Bra1253DRAFT_02336	9.64e-249	684.0	COG1063@1|root,COG1063@2|Bacteria,1MV9A@1224|Proteobacteria,2TTZZ@28211|Alphaproteobacteria,3JVH5@41294|Bradyrhizobiaceae	28211|Alphaproteobacteria	E	Alcohol dehydrogenase GroES-like domain	MA20_17025	-	-	-	-	-	-	-	-	-	-	ADH_N,ADH_zinc_N
RA01000365.1	1037409.BJ6T_69510	3.53e-205	570.0	COG0697@1|root,COG0697@2|Bacteria,1MXVF@1224|Proteobacteria,2TU7N@28211|Alphaproteobacteria,3JUZ9@41294|Bradyrhizobiaceae	28211|Alphaproteobacteria	EG	EamA-like transporter family	-	-	-	-	-	-	-	-	-	-	-	EamA
RA01000366.1	319003.Bra1253DRAFT_02338	2.21e-191	532.0	COG0656@1|root,COG0656@2|Bacteria,1MUH2@1224|Proteobacteria,2TTC2@28211|Alphaproteobacteria,3JV6E@41294|Bradyrhizobiaceae	28211|Alphaproteobacteria	S	Aldo/keto reductase family	MA20_17035	-	-	-	-	-	-	-	-	-	-	Aldo_ket_red
RA01000367.1	936455.KI421499_gene4465	4.88e-210	582.0	COG3386@1|root,COG3386@2|Bacteria,1MXVD@1224|Proteobacteria,2TVCW@28211|Alphaproteobacteria,3JTRB@41294|Bradyrhizobiaceae	28211|Alphaproteobacteria	G	SMP-30/Gluconolaconase/LRE-like region	MA20_17040	-	3.1.1.17	ko:K01053,ko:K02352	ko00030,ko00053,ko00930,ko01100,ko01110,ko01120,ko01130,ko01200,ko01220,map00030,map00053,map00930,map01100,map01110,map01120,map01130,map01200,map01220	M00129	R01519,R02933,R03751	RC00537,RC00983	ko00000,ko00001,ko00002,ko01000,ko04147	-	-	SGL
RA01000368.1	936455.KI421499_gene4466	0.0	911.0	COG0840@1|root,COG0840@2|Bacteria,1MU9B@1224|Proteobacteria,2TQR7@28211|Alphaproteobacteria,3JWY2@41294|Bradyrhizobiaceae	28211|Alphaproteobacteria	NT	Methyl-accepting chemotaxis-like domains (chemotaxis sensory transducer).	-	-	-	ko:K03406	ko02020,ko02030,map02020,map02030	-	-	-	ko00000,ko00001,ko02035	-	-	HAMP,MCPsignal
RA01000369.1	1040989.AWZU01000011_gene4011	1.35e-270	745.0	COG1228@1|root,COG1228@2|Bacteria,1MVAF@1224|Proteobacteria,2TTYC@28211|Alphaproteobacteria,3JSY1@41294|Bradyrhizobiaceae	28211|Alphaproteobacteria	Q	Amidohydrolase family	-	-	-	-	-	-	-	-	-	-	-	Amidohydro_1
RA01000370.1	1037409.BJ6T_69540	0.0	1735.0	COG0243@1|root,COG1251@1|root,COG0243@2|Bacteria,COG1251@2|Bacteria,1NS3T@1224|Proteobacteria,2TQYD@28211|Alphaproteobacteria,3JUBJ@41294|Bradyrhizobiaceae	28211|Alphaproteobacteria	C	Belongs to the prokaryotic molybdopterin-containing oxidoreductase family	nasA	-	-	ko:K00372,ko:K02567	ko00910,ko01120,map00910,map01120	M00529,M00530,M00531	R00798,R01106	RC02812	ko00000,ko00001,ko00002,ko01000	-	-	Fer2_BFD,Molybdop_Fe4S4,Molybdopterin,Molydop_binding
RA01000371.1	224911.27351065	3.07e-260	717.0	COG1251@1|root,COG1251@2|Bacteria,1MW58@1224|Proteobacteria,2TS8I@28211|Alphaproteobacteria,3JRH5@41294|Bradyrhizobiaceae	28211|Alphaproteobacteria	C	Pyridine nucleotide-disulphide oxidoreductase	nirB	-	1.2.1.58,1.7.1.15	ko:K00362,ko:K18359	ko00360,ko00910,ko01120,map00360,map00910,map01120	M00530	R00787,R02450	RC00004,RC00176,RC02860	br01601,ko00000,ko00001,ko00002,ko01000	-	-	Fer2_BFD,NIR_SIR,NIR_SIR_ferr,Pyr_redox_2,Rieske_2
RA01000372.1	1037409.BJ6T_69560	1.68e-89	263.0	COG1017@1|root,COG1017@2|Bacteria,1QVJP@1224|Proteobacteria,2U5M6@28211|Alphaproteobacteria,3JY65@41294|Bradyrhizobiaceae	28211|Alphaproteobacteria	C	Belongs to the globin family	MA20_17055	-	1.14.12.17	ko:K05916	ko05132,map05132	-	-	-	ko00000,ko00001,ko01000	-	-	Globin
RA01000373.1	1038866.KB902824_gene1377	0.0	892.0	COG2223@1|root,COG2223@2|Bacteria,1MU27@1224|Proteobacteria,2TSXZ@28211|Alphaproteobacteria,3JUV6@41294|Bradyrhizobiaceae	28211|Alphaproteobacteria	P	Major Facilitator Superfamily	narK	-	-	ko:K02575	ko00910,map00910	M00615	-	-	ko00000,ko00001,ko00002,ko02000	2.A.1.8	-	MFS_1
RA01000374.1	1126627.BAWE01000004_gene2955	2.79e-182	508.0	COG1116@1|root,COG1116@2|Bacteria,1MUDV@1224|Proteobacteria,2TUIC@28211|Alphaproteobacteria,3JTSM@41294|Bradyrhizobiaceae	28211|Alphaproteobacteria	P	ATPases associated with a variety of cellular activities	nrtC	-	-	ko:K02049,ko:K15578	ko00910,ko02010,map00910,map02010	M00188,M00438	-	-	ko00000,ko00001,ko00002,ko01000,ko02000	3.A.1.16,3.A.1.16.1,3.A.1.17	-	ABC_tran
RA01000375.1	1304877.KI519399_gene3972	4.14e-201	558.0	COG0600@1|root,COG0600@2|Bacteria,1MU6Q@1224|Proteobacteria,2TQT6@28211|Alphaproteobacteria,3JUAR@41294|Bradyrhizobiaceae	28211|Alphaproteobacteria	P	Binding-protein-dependent transport system inner membrane component	nrtB	-	-	ko:K02050,ko:K15577	ko00910,ko02010,map00910,map02010	M00188,M00438	-	-	ko00000,ko00001,ko00002,ko02000	3.A.1.16,3.A.1.16.1,3.A.1.16.2,3.A.1.17	-	BPD_transp_1
RA01000376.1	1304877.KI519399_gene3971	9.47e-317	863.0	COG0715@1|root,COG0715@2|Bacteria,1MWDN@1224|Proteobacteria,2TS0X@28211|Alphaproteobacteria,3JSSI@41294|Bradyrhizobiaceae	28211|Alphaproteobacteria	P	NMT1-like family	nrtA	-	-	ko:K15576	ko00910,ko02010,map00910,map02010	M00438	-	-	ko00000,ko00001,ko00002,ko02000	3.A.1.16.1,3.A.1.16.2	-	NMT1_2
RA01000377.1	1038866.KB902824_gene1373	1.91e-176	494.0	COG2116@1|root,COG2116@2|Bacteria,1MU0W@1224|Proteobacteria,2TTIW@28211|Alphaproteobacteria,3JRBF@41294|Bradyrhizobiaceae	28211|Alphaproteobacteria	P	Formate/nitrite transporter	MA20_17080	-	-	-	-	-	-	-	-	-	-	Form_Nir_trans
RA01000378.1	1037409.BJ6T_69630	0.0	1095.0	COG0515@1|root,COG0631@1|root,COG0515@2|Bacteria,COG0631@2|Bacteria,1MV1P@1224|Proteobacteria,2TQTS@28211|Alphaproteobacteria,3JQUJ@41294|Bradyrhizobiaceae	28211|Alphaproteobacteria	KLT	Serine/threonine phosphatases, family 2C, catalytic domain	MA20_17085	-	-	-	-	-	-	-	-	-	-	PP2C_2,Pkinase
RA01000381.1	1038862.KB893873_gene7296	2.93e-16	72.0	2AFUS@1|root,315X8@2|Bacteria,1NFN3@1224|Proteobacteria,2UHJ2@28211|Alphaproteobacteria,3K157@41294|Bradyrhizobiaceae	28211|Alphaproteobacteria	-	-	-	-	-	-	-	-	-	-	-	-	-	-
RA01000382.1	1037409.BJ6T_62340	1.07e-61	190.0	2EQ9R@1|root,33HVW@2|Bacteria,1RHDQ@1224|Proteobacteria,2UAM4@28211|Alphaproteobacteria,3JZW2@41294|Bradyrhizobiaceae	28211|Alphaproteobacteria	-	-	-	-	-	-	-	-	-	-	-	-	-	-
RA01000383.1	443598.AUFA01000021_gene2975	6.93e-46	149.0	COG3360@1|root,COG3360@2|Bacteria,1PE74@1224|Proteobacteria,2UCH8@28211|Alphaproteobacteria,3K04J@41294|Bradyrhizobiaceae	28211|Alphaproteobacteria	P	Dodecin	-	-	-	ko:K09165	-	-	-	-	ko00000	-	-	Dodecin
RA01000384.1	936455.KI421499_gene4479	5.78e-216	596.0	COG3485@1|root,COG3485@2|Bacteria,1MX7W@1224|Proteobacteria,2TT8T@28211|Alphaproteobacteria,3JRKQ@41294|Bradyrhizobiaceae	28211|Alphaproteobacteria	Q	Function proposed based on presence of conserved amino acid motif, structural feature or limited homology	MA20_17090	-	1.13.11.37	ko:K04098	ko00361,ko00362,ko01100,ko01120,map00361,map00362,map01100,map01120	-	R03891,R04061	RC00388,RC01016	ko00000,ko00001,ko01000	-	-	Dioxygenase_C,Dioxygenase_N
RA01000385.1	936455.KI421499_gene4480	1.31e-304	830.0	COG1680@1|root,COG1680@2|Bacteria,1MVPR@1224|Proteobacteria,2TRWZ@28211|Alphaproteobacteria,3JQWG@41294|Bradyrhizobiaceae	28211|Alphaproteobacteria	V	Beta-lactamase	MA20_17095	-	-	-	-	-	-	-	-	-	-	Beta-lactamase
RA01000386.1	1126627.BAWE01000004_gene2946	1.21e-287	789.0	COG1593@1|root,COG1593@2|Bacteria,1MU0F@1224|Proteobacteria,2TQW5@28211|Alphaproteobacteria,3JWQW@41294|Bradyrhizobiaceae	28211|Alphaproteobacteria	G	Tripartite ATP-independent periplasmic transporter, DctM component	MA20_17100	-	-	-	-	-	-	-	-	-	-	DctM
RA01000387.1	936455.KI421499_gene4482	5.08e-114	327.0	COG3090@1|root,COG3090@2|Bacteria,1QXYB@1224|Proteobacteria,2TTWD@28211|Alphaproteobacteria,3JUNI@41294|Bradyrhizobiaceae	28211|Alphaproteobacteria	G	Tripartite ATP-independent periplasmic transporters, DctQ component	-	-	-	-	-	-	-	-	-	-	-	DctQ
RA01000388.1	1037409.BJ6T_69690	1.09e-229	633.0	COG1638@1|root,COG1638@2|Bacteria,1MXUZ@1224|Proteobacteria,2TTTA@28211|Alphaproteobacteria,3JR1D@41294|Bradyrhizobiaceae	28211|Alphaproteobacteria	G	Bacterial extracellular solute-binding protein, family 7	MA20_17110	-	-	-	-	-	-	-	-	-	-	DctP
RA01000389.1	224911.27351054	2.72e-42	139.0	2AD3C@1|root,312RN@2|Bacteria,1N4AJ@1224|Proteobacteria,2UCDU@28211|Alphaproteobacteria,3K0EN@41294|Bradyrhizobiaceae	28211|Alphaproteobacteria	-	-	-	-	-	-	-	-	-	-	-	-	-	-
RA01000390.1	224911.27351053	5.11e-64	196.0	2EGV5@1|root,33AMB@2|Bacteria,1RESC@1224|Proteobacteria,2U7A9@28211|Alphaproteobacteria,3JZVT@41294|Bradyrhizobiaceae	28211|Alphaproteobacteria	S	Protein of unknown function (DUF1236)	-	-	-	-	-	-	-	-	-	-	-	DUF1236
RA01000391.1	1037409.BJ6T_69700	8.06e-309	847.0	COG3920@1|root,COG3920@2|Bacteria,1NU8D@1224|Proteobacteria,2U0N4@28211|Alphaproteobacteria,3JQZW@41294|Bradyrhizobiaceae	28211|Alphaproteobacteria	T	HWE histidine kinase	-	-	2.1.1.80,3.1.1.61	ko:K13924	ko02020,ko02030,map02020,map02030	M00506	-	-	ko00000,ko00001,ko00002,ko01000,ko02022,ko02035	-	-	HWE_HK,PAS_9,dCache_1
RA01000392.1	1037409.BJ6T_69710	6.86e-259	711.0	COG4948@1|root,COG4948@2|Bacteria,1MW5B@1224|Proteobacteria,2UNXP@28211|Alphaproteobacteria,3K6K3@41294|Bradyrhizobiaceae	28211|Alphaproteobacteria	M	Mandelate racemase / muconate lactonizing enzyme, C-terminal domain	gci	-	5.5.1.27	ko:K18983	ko00053,map00053	-	R10847	RC03287	ko00000,ko00001,ko01000	-	-	MR_MLE_C,MR_MLE_N
RA01000393.1	1038866.KB902802_gene7031	1.57e-201	566.0	COG2311@1|root,COG2311@2|Bacteria,1MWHW@1224|Proteobacteria,2UBZQ@28211|Alphaproteobacteria,3JTRV@41294|Bradyrhizobiaceae	28211|Alphaproteobacteria	S	Protein of unknown function (DUF418)	-	-	-	ko:K07148	-	-	-	-	ko00000	-	-	DUF418
RA01000394.1	318996.AXAZ01000001_gene4722	1.36e-158	446.0	COG0785@1|root,COG0785@2|Bacteria,1RCP7@1224|Proteobacteria,2TSAI@28211|Alphaproteobacteria,3JS7I@41294|Bradyrhizobiaceae	28211|Alphaproteobacteria	O	cytochrome c biogenesis protein	MA20_17170	-	-	ko:K06196	-	-	-	-	ko00000,ko02000	5.A.1.2	-	DsbD
RA01000395.1	224911.27351045	1.98e-49	157.0	29CCX@1|root,2ZZBD@2|Bacteria,1MZTJ@1224|Proteobacteria,2UCRB@28211|Alphaproteobacteria,3K0C0@41294|Bradyrhizobiaceae	28211|Alphaproteobacteria	-	-	-	-	-	-	-	-	-	-	-	-	-	-
RA01000396.1	1037409.BJ6T_69800	3.35e-246	676.0	COG0583@1|root,COG0583@2|Bacteria,1Q0YI@1224|Proteobacteria,2TT5W@28211|Alphaproteobacteria,3JVAR@41294|Bradyrhizobiaceae	28211|Alphaproteobacteria	K	Function proposed based on presence of conserved amino acid motif, structural feature or limited homology	MA20_17180	-	-	-	-	-	-	-	-	-	-	HTH_1,LysR_substrate
RA01000397.1	224911.27351042	3.71e-79	236.0	COG1396@1|root,COG1396@2|Bacteria,1RDBW@1224|Proteobacteria,2U7CY@28211|Alphaproteobacteria,3JY0P@41294|Bradyrhizobiaceae	28211|Alphaproteobacteria	K	Cro/C1-type HTH DNA-binding domain	QU41_21520	-	-	-	-	-	-	-	-	-	-	HTH_3
RA01000398.1	319003.Bra1253DRAFT_02365	5.3e-287	788.0	COG2989@1|root,COG2989@2|Bacteria,1MV14@1224|Proteobacteria,2TRJ9@28211|Alphaproteobacteria,3JS8H@41294|Bradyrhizobiaceae	28211|Alphaproteobacteria	S	L,D-transpeptidase catalytic domain	-	-	-	ko:K21470,ko:K21572	-	-	-	-	ko00000,ko01002,ko01011,ko02000	8.A.46.1,8.A.46.3	-	PG_binding_1,YkuD
RA01000399.1	335659.S23_52100	8.85e-179	499.0	COG1024@1|root,COG1024@2|Bacteria,1MXBB@1224|Proteobacteria,2TU4V@28211|Alphaproteobacteria,3JRS0@41294|Bradyrhizobiaceae	28211|Alphaproteobacteria	I	Belongs to the enoyl-CoA hydratase isomerase family	-	-	4.1.1.41,4.2.1.17	ko:K01692,ko:K11264	ko00071,ko00280,ko00281,ko00310,ko00360,ko00362,ko00380,ko00410,ko00627,ko00640,ko00650,ko00903,ko00930,ko01100,ko01110,ko01120,ko01130,ko01212,map00071,map00280,map00281,map00310,map00360,map00362,map00380,map00410,map00627,map00640,map00650,map00903,map00930,map01100,map01110,map01120,map01130,map01212	M00032,M00087	R00923,R03026,R03045,R04137,R04170,R04204,R04224,R04738,R04740,R04744,R04746,R04749,R05595,R06411,R06412,R06942,R08093	RC00097,RC00831,RC00834,RC01086,RC01095,RC01098,RC01103,RC01217,RC02115	ko00000,ko00001,ko00002,ko01000	-	-	ECH_1
RA01000400.1	936455.KI421499_gene4500	9.14e-55	171.0	29CMP@1|root,2ZZJY@2|Bacteria,1N0QN@1224|Proteobacteria,2UCPN@28211|Alphaproteobacteria,3K0CR@41294|Bradyrhizobiaceae	28211|Alphaproteobacteria	-	-	-	-	-	-	-	-	-	-	-	-	-	-
RA01000401.1	936455.KI421499_gene4501	6.34e-254	697.0	COG0473@1|root,COG0473@2|Bacteria,1MUH4@1224|Proteobacteria,2TSXM@28211|Alphaproteobacteria,3JUNR@41294|Bradyrhizobiaceae	28211|Alphaproteobacteria	CE	Isocitrate/isopropylmalate dehydrogenase	MA20_17220	GO:0006082,GO:0006575,GO:0006732,GO:0006793,GO:0006807,GO:0008150,GO:0008152,GO:0009058,GO:0009108,GO:0009987,GO:0016053,GO:0019297,GO:0019298,GO:0019752,GO:0032787,GO:0042398,GO:0043436,GO:0044237,GO:0044249,GO:0044281,GO:0044283,GO:0046394,GO:0051186,GO:0051188,GO:0071704,GO:0072330,GO:1901564,GO:1901566,GO:1901576	1.1.1.85	ko:K00052	ko00290,ko00660,ko01100,ko01110,ko01210,ko01230,map00290,map00660,map01100,map01110,map01210,map01230	M00432,M00535	R00994,R04426,R10052	RC00084,RC00417,RC03036	br01601,ko00000,ko00001,ko00002,ko01000	-	-	Iso_dh,MoCF_biosynth
RA01000402.1	1038866.KB902824_gene1350	5.89e-257	704.0	COG1064@1|root,COG1064@2|Bacteria,1MUTT@1224|Proteobacteria,2TTMV@28211|Alphaproteobacteria,3JR4E@41294|Bradyrhizobiaceae	28211|Alphaproteobacteria	S	alcohol dehydrogenase	MA20_17225	-	1.1.1.1	ko:K00001,ko:K13953	ko00010,ko00071,ko00350,ko00625,ko00626,ko00830,ko00980,ko00982,ko01100,ko01110,ko01120,ko01130,ko01220,map00010,map00071,map00350,map00625,map00626,map00830,map00980,map00982,map01100,map01110,map01120,map01130,map01220	-	R00623,R00754,R02124,R04805,R04880,R05233,R05234,R06917,R06927,R07105,R08281,R08306,R08310	RC00050,RC00087,RC00088,RC00099,RC00116,RC00649,RC01734,RC02273	ko00000,ko00001,ko01000	-	-	ADH_N,ADH_zinc_N
RA01000403.1	1037409.BJ6T_69950	1.12e-269	740.0	COG1804@1|root,COG1804@2|Bacteria,1MU2K@1224|Proteobacteria,2TRB6@28211|Alphaproteobacteria,3JS4V@41294|Bradyrhizobiaceae	28211|Alphaproteobacteria	C	CoA-transferase family III	MA20_17255	-	2.8.3.16	ko:K07749	-	-	-	-	ko00000,ko01000	-	-	CoA_transf_3
RA01000404.1	319003.Bra1253DRAFT_02371	0.0	915.0	COG0297@1|root,COG0297@2|Bacteria,1MUGM@1224|Proteobacteria,2TT73@28211|Alphaproteobacteria,3JS05@41294|Bradyrhizobiaceae	28211|Alphaproteobacteria	G	Synthesizes alpha-1,4-glucan chains using ADP-glucose	MA20_17260	GO:0003674,GO:0003824,GO:0016740,GO:0016757	2.4.1.21	ko:K00703	ko00500,ko01100,ko01110,ko02026,map00500,map01100,map01110,map02026	M00565	R02421	RC00005	ko00000,ko00001,ko00002,ko01000,ko01003	-	GT5	Glyco_transf_5,Glycos_transf_1
RA01000405.1	318996.AXAZ01000001_gene4713	1.14e-207	576.0	COG3662@1|root,COG3662@2|Bacteria,1R50Q@1224|Proteobacteria,2TSG5@28211|Alphaproteobacteria,3JVJ5@41294|Bradyrhizobiaceae	28211|Alphaproteobacteria	S	Uncharacterized protein conserved in bacteria (DUF2236)	-	-	-	-	-	-	-	-	-	-	-	DUF2236
RA01000406.1	318996.AXAZ01000001_gene4712	2.96e-264	725.0	COG1752@1|root,COG1752@2|Bacteria,1MVHW@1224|Proteobacteria,2TS4V@28211|Alphaproteobacteria,3JTI6@41294|Bradyrhizobiaceae	28211|Alphaproteobacteria	S	Patatin phospholipase	MA20_17270	-	-	ko:K07001	-	-	-	-	ko00000	-	-	DUF3734,Patatin
RA01000407.1	335659.S23_52240	2.37e-194	541.0	COG0583@1|root,COG0583@2|Bacteria,1R51E@1224|Proteobacteria,2TZIK@28211|Alphaproteobacteria,3JW8F@41294|Bradyrhizobiaceae	28211|Alphaproteobacteria	K	Bacterial regulatory helix-turn-helix protein, lysR family	-	-	-	-	-	-	-	-	-	-	-	HTH_1,LysR_substrate
RA01000408.1	335659.S23_52250	1.37e-160	451.0	COG1225@1|root,COG1225@2|Bacteria,1MWFZ@1224|Proteobacteria,2TRJM@28211|Alphaproteobacteria,3JTTW@41294|Bradyrhizobiaceae	28211|Alphaproteobacteria	O	Redoxin	-	-	-	-	-	-	-	-	-	-	-	AhpC-TSA,Redoxin
RA01000409.1	1038866.KB902824_gene1337	1.43e-110	318.0	COG1917@1|root,COG1917@2|Bacteria,1PBNJ@1224|Proteobacteria,2U1VG@28211|Alphaproteobacteria,3JW2I@41294|Bradyrhizobiaceae	28211|Alphaproteobacteria	S	Cupin domain	-	-	-	-	-	-	-	-	-	-	-	Cupin_2
RA01000410.1	224911.27351028	7.67e-246	680.0	COG0477@1|root,COG2814@2|Bacteria,1MWFH@1224|Proteobacteria,2TR0R@28211|Alphaproteobacteria,3JVQA@41294|Bradyrhizobiaceae	28211|Alphaproteobacteria	EGP	Major Facilitator Superfamily	-	-	-	ko:K08224	-	-	-	-	ko00000,ko02000	2.A.1.36	-	MFS_1,Sugar_tr
RA01000411.1	1126627.BAWE01000004_gene2916	5.6e-30	106.0	COG3197@1|root,COG3197@2|Bacteria,1NG90@1224|Proteobacteria,2UJFJ@28211|Alphaproteobacteria,3K1A3@41294|Bradyrhizobiaceae	28211|Alphaproteobacteria	P	Cytochrome oxidase maturation protein cbb3-type	fixS	-	-	-	-	-	-	-	-	-	-	FixS
RA01000412.1	224911.27351026	0.0	1333.0	COG2217@1|root,COG2217@2|Bacteria,1MU08@1224|Proteobacteria,2TR80@28211|Alphaproteobacteria,3JTAD@41294|Bradyrhizobiaceae	28211|Alphaproteobacteria	P	Heavy-metal-associated domain	fixI	GO:0003674,GO:0003824,GO:0005215,GO:0005388,GO:0005575,GO:0005622,GO:0005623,GO:0005886,GO:0005887,GO:0006810,GO:0006811,GO:0006812,GO:0006816,GO:0008150,GO:0008324,GO:0015075,GO:0015085,GO:0015318,GO:0015399,GO:0015405,GO:0015662,GO:0016020,GO:0016021,GO:0016462,GO:0016787,GO:0016817,GO:0016818,GO:0016887,GO:0017111,GO:0019829,GO:0022804,GO:0022853,GO:0022857,GO:0022890,GO:0030001,GO:0031224,GO:…	3.6.3.4	ko:K01533	-	-	R00086	RC00002	ko00000,ko01000	3.A.3.5	-	E1-E2_ATPase,HMA,Hydrolase
RA01000413.1	1126627.BAWE01000004_gene2914	3.77e-102	296.0	COG5456@1|root,COG5456@2|Bacteria,1RHKI@1224|Proteobacteria,2U9GB@28211|Alphaproteobacteria,3JUM5@41294|Bradyrhizobiaceae	28211|Alphaproteobacteria	P	FixH	fixH	-	-	-	-	-	-	-	-	-	-	FixH
RA01000414.1	224911.27351024	0.0	966.0	COG0348@1|root,COG0348@2|Bacteria,1MVFY@1224|Proteobacteria,2TRYB@28211|Alphaproteobacteria,3JQTF@41294|Bradyrhizobiaceae	28211|Alphaproteobacteria	C	4Fe-4S ferredoxin, iron-sulfur binding domain	ccoG	GO:0005575,GO:0005623,GO:0005886,GO:0016020,GO:0044464,GO:0071944	-	-	-	-	-	-	-	-	-	Fer4_18,Fer4_5,FixG_C
RA01000415.1	1038862.KB893866_gene5205	1.99e-204	566.0	COG2010@1|root,COG2010@2|Bacteria,1MUCW@1224|Proteobacteria,2TQW1@28211|Alphaproteobacteria,3JQXG@41294|Bradyrhizobiaceae	28211|Alphaproteobacteria	C	C-type cytochrome. Part of the cbb3-type cytochrome c oxidase complex	ccoP	-	-	ko:K00406	ko00190,ko01100,ko02020,map00190,map01100,map02020	M00156	-	-	ko00000,ko00001,ko00002	3.D.4.3	-	Cytochrome_CBB3,FixP_N
RA01000416.1	1038862.KB893866_gene5204	6.14e-29	103.0	COG4736@1|root,COG4736@2|Bacteria,1N8DU@1224|Proteobacteria,2UG4W@28211|Alphaproteobacteria,3K0ZN@41294|Bradyrhizobiaceae	28211|Alphaproteobacteria	O	Cbb3-type cytochrome oxidase component FixQ	fixQ	-	-	ko:K00407	ko00190,ko01100,ko02020,map00190,map01100,map02020	M00156	-	-	ko00000,ko00001,ko00002	3.D.4.3	-	FixQ
RA01000417.1	1037409.BJ6T_70100	1.39e-172	481.0	COG2993@1|root,COG2993@2|Bacteria,1MXEY@1224|Proteobacteria,2TRGW@28211|Alphaproteobacteria,3JUIE@41294|Bradyrhizobiaceae	28211|Alphaproteobacteria	C	Cytochrome C oxidase, mono-heme subunit/FixO	ccoO	-	-	ko:K00405	ko00190,ko01100,ko02020,map00190,map01100,map02020	M00156	-	-	ko00000,ko00001,ko00002	3.D.4.3	-	FixO
RA01000418.1	224911.27351020	0.0	1087.0	COG3278@1|root,COG3278@2|Bacteria,1MU18@1224|Proteobacteria,2TR2C@28211|Alphaproteobacteria,3JV5P@41294|Bradyrhizobiaceae	28211|Alphaproteobacteria	C	Belongs to the heme-copper respiratory oxidase family	ccoN	GO:0005575,GO:0005623,GO:0005886,GO:0006091,GO:0006810,GO:0006811,GO:0006812,GO:0008150,GO:0008152,GO:0009060,GO:0009987,GO:0015672,GO:0015980,GO:0015988,GO:0015990,GO:0016020,GO:0022900,GO:0022904,GO:0034220,GO:0044237,GO:0044464,GO:0045333,GO:0051179,GO:0051234,GO:0055085,GO:0055114,GO:0071944,GO:0098655,GO:0098660,GO:0098662,GO:1902600	1.9.3.1	ko:K00404	ko00190,ko01100,ko02020,map00190,map01100,map02020	M00156	-	-	ko00000,ko00001,ko00002,ko01000	3.D.4.3	-	COX1
RA01000419.1	224911.27351019	7.71e-90	264.0	COG3448@1|root,COG3448@2|Bacteria,1R9YN@1224|Proteobacteria,2U5R2@28211|Alphaproteobacteria,3JY2C@41294|Bradyrhizobiaceae	28211|Alphaproteobacteria	T	Domain in cystathionine beta-synthase and other proteins.	-	-	-	-	-	-	-	-	-	-	-	CBS
RA01000420.1	224911.27351018	5.1e-164	462.0	COG0589@1|root,COG0589@2|Bacteria,1MWHD@1224|Proteobacteria,2U0GR@28211|Alphaproteobacteria,3JW5B@41294|Bradyrhizobiaceae	28211|Alphaproteobacteria	T	PFAM UspA domain protein	-	-	-	-	-	-	-	-	-	-	-	Usp
RA01000421.1	1038862.KB893866_gene5199	0.0	924.0	COG4191@1|root,COG4191@2|Bacteria,1RCM9@1224|Proteobacteria,2TR8X@28211|Alphaproteobacteria,3JR6P@41294|Bradyrhizobiaceae	28211|Alphaproteobacteria	T	Histidine kinase	fixL	-	2.7.13.3	ko:K14986	ko02020,map02020	M00524	-	-	ko00000,ko00001,ko00002,ko01000,ko01001,ko02022	-	-	HATPase_c,HisKA,MEDS,PAS,PAS_3,PAS_9
RA01000422.1	335659.S23_52410	7.99e-130	370.0	COG4566@1|root,COG4566@2|Bacteria,1N6WR@1224|Proteobacteria,2TUND@28211|Alphaproteobacteria,3JRSJ@41294|Bradyrhizobiaceae	28211|Alphaproteobacteria	T	helix_turn_helix, Lux Regulon	fixJ	-	-	ko:K14987	ko02020,map02020	M00524	-	-	ko00000,ko00001,ko00002,ko02022	-	-	GerE,Response_reg
RA01000423.1	1038866.KB902824_gene1323	6.57e-76	228.0	COG4566@1|root,COG4566@2|Bacteria,1MZ7R@1224|Proteobacteria,2UBUU@28211|Alphaproteobacteria,3JYV6@41294|Bradyrhizobiaceae	28211|Alphaproteobacteria	T	Response regulator receiver	-	-	-	-	-	-	-	-	-	-	-	Response_reg
RA01000424.1	1038862.KB893866_gene5196	7.29e-156	438.0	COG0664@1|root,COG0664@2|Bacteria,1MVGE@1224|Proteobacteria,2U36S@28211|Alphaproteobacteria,3JTBY@41294|Bradyrhizobiaceae	28211|Alphaproteobacteria	K	Crp Fnr family	fixK	-	-	ko:K01420,ko:K15861	ko02020,map02020	-	-	-	ko00000,ko00001,ko03000	-	-	HTH_Crp_2,cNMP_binding
RA01000425.1	1038862.KB893866_gene5195	4.82e-270	744.0	COG0477@1|root,COG2814@2|Bacteria,1N8TD@1224|Proteobacteria,2TTRZ@28211|Alphaproteobacteria,3JREB@41294|Bradyrhizobiaceae	28211|Alphaproteobacteria	EGP	Major facilitator Superfamily	MA20_17370	-	-	-	-	-	-	-	-	-	-	MFS_1
RA01000426.1	1038866.KB902824_gene1320	1.8e-85	255.0	COG3861@1|root,COG3861@2|Bacteria,1R6C3@1224|Proteobacteria,2UDUU@28211|Alphaproteobacteria,3JU9P@41294|Bradyrhizobiaceae	28211|Alphaproteobacteria	S	PRC-barrel domain	-	-	-	-	-	-	-	-	-	-	-	PRC
RA01000427.1	1038866.KB902824_gene1319	0.0	1425.0	COG3408@1|root,COG3408@2|Bacteria,1MUYU@1224|Proteobacteria,2TQK2@28211|Alphaproteobacteria,3JSVR@41294|Bradyrhizobiaceae	28211|Alphaproteobacteria	G	N-terminal domain of (some) glycogen debranching enzymes	MA20_17380	-	-	-	-	-	-	-	-	-	-	Bac_rhamnosid6H,GDE_C,GDE_N_bis
RA01000428.1	224911.27351010	0.0	1093.0	COG1132@1|root,COG1132@2|Bacteria,1MUBM@1224|Proteobacteria,2TQMR@28211|Alphaproteobacteria,3JQZ2@41294|Bradyrhizobiaceae	28211|Alphaproteobacteria	V	ABC transporter transmembrane region	MA20_17385	-	-	ko:K06147,ko:K18893	ko02010,map02010	-	-	-	ko00000,ko00001,ko02000	3.A.1,3.A.1.106,3.A.1.109,3.A.1.21	-	ABC_membrane,ABC_tran
RA01000429.1	1038866.KB902824_gene1317	1.1e-257	706.0	COG0438@1|root,COG0438@2|Bacteria,1MWSZ@1224|Proteobacteria,2TQQK@28211|Alphaproteobacteria,3JT3F@41294|Bradyrhizobiaceae	28211|Alphaproteobacteria	M	Glycosyltransferase Family 4	MA20_17390	-	2.4.1.348	ko:K12995	-	-	-	-	ko00000,ko01000,ko01003,ko01005	-	GT4	Glyco_transf_4,Glycos_transf_1
RA01000430.1	1038866.KB902824_gene1316	0.0	1231.0	COG2015@1|root,COG2015@2|Bacteria,1MU82@1224|Proteobacteria,2TSM1@28211|Alphaproteobacteria,3JSM0@41294|Bradyrhizobiaceae	28211|Alphaproteobacteria	Q	Alkyl sulfatase dimerisation	MA20_17395	-	-	-	-	-	-	-	-	-	-	Alkyl_sulf_C,Alkyl_sulf_dimr,Lactamase_B
RA01000431.1	318996.AXAZ01000001_gene4699	0.0	1225.0	COG1593@1|root,COG3090@1|root,COG1593@2|Bacteria,COG3090@2|Bacteria,1MU0F@1224|Proteobacteria,2TQW5@28211|Alphaproteobacteria,3JSJN@41294|Bradyrhizobiaceae	28211|Alphaproteobacteria	G	Tripartite ATP-independent periplasmic transporter, DctM component	dctM	GO:0005575,GO:0016020,GO:0016021,GO:0031224,GO:0044425	-	ko:K11690	ko02020,map02020	-	-	-	ko00000,ko00001,ko02000	2.A.56.1	-	DctM,DctQ
RA01000432.1	318996.AXAZ01000001_gene4698	1.09e-225	623.0	COG1638@1|root,COG1638@2|Bacteria,1R75H@1224|Proteobacteria,2TVE0@28211|Alphaproteobacteria,3JV75@41294|Bradyrhizobiaceae	28211|Alphaproteobacteria	G	Bacterial extracellular solute-binding protein, family 7	MA20_17410	-	-	ko:K11688	ko02020,map02020	-	-	-	ko00000,ko00001,ko02000	2.A.56.1	-	DctP
RA01000433.1	1037409.BJ6T_70260	3.91e-169	474.0	COG4106@1|root,COG4106@2|Bacteria,1Q2Y3@1224|Proteobacteria,2TU5T@28211|Alphaproteobacteria,3JXPE@41294|Bradyrhizobiaceae	28211|Alphaproteobacteria	S	Catalyzes the S-adenosylmethionine monomethyl esterification of trans-aconitate	tam	-	2.1.1.144	ko:K00598	-	-	-	-	ko00000,ko01000	-	-	Methyltransf_23,Methyltransf_25,Methyltransf_31
RA01000434.1	224911.27351004	4.8e-170	475.0	COG1028@1|root,COG1028@2|Bacteria,1QWBB@1224|Proteobacteria,2U2FD@28211|Alphaproteobacteria,3JSE3@41294|Bradyrhizobiaceae	28211|Alphaproteobacteria	IQ	Enoyl-(Acyl carrier protein) reductase	MA20_17420	-	1.1.1.100	ko:K00059	ko00061,ko00333,ko00780,ko01040,ko01100,ko01130,ko01212,map00061,map00333,map00780,map01040,map01100,map01130,map01212	M00083,M00572	R04533,R04534,R04536,R04543,R04566,R04953,R04964,R07759,R07763,R10116,R10120,R11671	RC00029,RC00117	ko00000,ko00001,ko00002,ko01000,ko01004	-	-	adh_short,adh_short_C2
RA01000435.1	224911.27351003	6.23e-235	650.0	COG2771@1|root,COG2771@2|Bacteria,1MWC0@1224|Proteobacteria,2TU6G@28211|Alphaproteobacteria,3K5SX@41294|Bradyrhizobiaceae	28211|Alphaproteobacteria	K	helix_turn_helix, Lux Regulon	-	-	-	-	-	-	-	-	-	-	-	GerE
RA01000436.1	224911.27351002	1.21e-197	551.0	COG0500@1|root,COG0500@2|Bacteria	2|Bacteria	Q	methyltransferase activity	-	-	-	-	-	-	-	-	-	-	-	Methyltransf_11,Methyltransf_2,Methyltransf_25
RA01000437.1	224911.27351001	2.7e-60	189.0	2ADR5@1|root,313GG@2|Bacteria,1N6NM@1224|Proteobacteria,2UEJV@28211|Alphaproteobacteria,3K09K@41294|Bradyrhizobiaceae	28211|Alphaproteobacteria	-	-	-	-	-	-	-	-	-	-	-	-	-	-
RA01000438.1	224911.27350998	5.12e-231	639.0	COG0473@1|root,COG0473@2|Bacteria,1QU2H@1224|Proteobacteria,2VFXG@28211|Alphaproteobacteria,3JRN8@41294|Bradyrhizobiaceae	28211|Alphaproteobacteria	CE	Isocitrate/isopropylmalate dehydrogenase	-	-	1.1.1.42,1.1.1.83,1.1.1.85,1.1.1.93,4.1.1.73	ko:K00031,ko:K00052,ko:K07246	ko00020,ko00290,ko00480,ko00630,ko00650,ko00660,ko00720,ko01100,ko01110,ko01120,ko01130,ko01200,ko01210,ko01230,ko04146,map00020,map00290,map00480,map00630,map00650,map00660,map00720,map01100,map01110,map01120,map01130,map01200,map01210,map01230,map04146	M00009,M00010,M00173,M00432,M00535,M00740	R00215,R00267,R00268,R00994,R01751,R01899,R02545,R04426,R06180,R10052	RC00001,RC00084,RC00105,RC00114,RC00417,RC00594,RC00626,RC02801,RC03036	br01601,ko00000,ko00001,ko00002,ko01000	-	-	Iso_dh
RA01000439.1	224911.27350997	1.94e-311	852.0	COG0477@1|root,COG0477@2|Bacteria,1MWUR@1224|Proteobacteria,2TT7N@28211|Alphaproteobacteria,3JU94@41294|Bradyrhizobiaceae	28211|Alphaproteobacteria	EGP	Major Facilitator Superfamily	MA20_17480	-	-	ko:K08169	-	-	-	-	ko00000,ko02000	2.A.1.3.17	-	MFS_1
RA01000440.1	318996.AXAZ01000001_gene4689	0.0	1013.0	COG1032@1|root,COG1032@2|Bacteria,1MY2Y@1224|Proteobacteria,2TUIT@28211|Alphaproteobacteria,3JQP1@41294|Bradyrhizobiaceae	28211|Alphaproteobacteria	C	Domain of unknown function (DUF4070)	MA20_17485	-	-	-	-	-	-	-	-	-	-	B12-binding,DUF4070,Radical_SAM
RA01000441.1	1126627.BAWE01000004_gene2883	5.33e-103	298.0	COG2080@1|root,COG2080@2|Bacteria,1RD8C@1224|Proteobacteria,2U6Z6@28211|Alphaproteobacteria,3JQR4@41294|Bradyrhizobiaceae	28211|Alphaproteobacteria	C	[2Fe-2S] binding domain	MA20_17490	-	1.3.99.16	ko:K07302	-	-	-	-	ko00000,ko01000	-	-	Fer2,Fer2_2
RA01000442.1	318996.AXAZ01000001_gene4687	0.0	1425.0	COG1529@1|root,COG1529@2|Bacteria,1QTTJ@1224|Proteobacteria,2TQVK@28211|Alphaproteobacteria,3JSW3@41294|Bradyrhizobiaceae	28211|Alphaproteobacteria	C	Aldehyde oxidase and xanthine dehydrogenase, a/b hammerhead domain	MA20_17495	-	1.3.99.16	ko:K07303	-	-	-	-	ko00000,ko01000	-	-	Ald_Xan_dh_C2
RA01000443.1	224911.27350992	4.74e-273	751.0	COG0446@1|root,COG0446@2|Bacteria,1N5MC@1224|Proteobacteria,2TT55@28211|Alphaproteobacteria,3JTFD@41294|Bradyrhizobiaceae	28211|Alphaproteobacteria	S	Flavocytochrome c sulphide dehydrogenase, flavin-binding	fccB	-	1.8.2.3,1.8.5.4	ko:K17218,ko:K17229	ko00920,ko01120,map00920,map01120	-	R09499,R10152	RC03155	ko00000,ko00001,ko01000	-	-	FCSD-flav_bind,Pyr_redox_2
RA01000444.1	1038867.AXAY01000001_gene6408	2.65e-79	239.0	COG2010@1|root,COG2010@2|Bacteria,1RIV2@1224|Proteobacteria,2U9C5@28211|Alphaproteobacteria,3JZ5J@41294|Bradyrhizobiaceae	28211|Alphaproteobacteria	C	Cytochrome c	-	-	-	ko:K17223	ko00920,ko01100,ko01120,map00920,map01100,map01120	M00595	R10151	RC03151,RC03152	ko00000,ko00001,ko00002	-	-	Cytochrom_C
RA01000445.1	1037409.BJ6T_70440	1.5e-96	282.0	COG5501@1|root,COG5501@2|Bacteria,1RH4J@1224|Proteobacteria,2U72E@28211|Alphaproteobacteria,3JUV9@41294|Bradyrhizobiaceae	28211|Alphaproteobacteria	S	Sulfur oxidation protein SoxY	MA20_17510	-	-	ko:K17226	ko00920,ko01100,ko01120,map00920,map01100,map01120	M00595	R10151	RC03151,RC03152	ko00000,ko00001,ko00002	-	-	SoxY
RA01000446.1	1037409.BJ6T_70450	4.57e-65	198.0	COG5501@1|root,COG5501@2|Bacteria,1N03V@1224|Proteobacteria,2TWQY@28211|Alphaproteobacteria,3JZTG@41294|Bradyrhizobiaceae	28211|Alphaproteobacteria	S	Sulphur oxidation protein SoxZ	MA20_17515	-	-	ko:K17227	ko00920,ko01100,ko01120,map00920,map01100,map01120	M00595	R10151	RC03151,RC03152	ko00000,ko00001,ko00002	-	-	SoxZ
RA01000447.1	443598.AUFA01000002_gene2451	6.52e-174	486.0	COG3258@1|root,COG3258@2|Bacteria,1MXB0@1224|Proteobacteria,2TTDW@28211|Alphaproteobacteria,3JT60@41294|Bradyrhizobiaceae	28211|Alphaproteobacteria	C	Thiosulfate-oxidizing multienzyme system protein SoxA	-	-	-	ko:K17222	ko00920,ko01100,ko01120,map00920,map01100,map01120	M00595	R10151	RC03151,RC03152	ko00000,ko00001,ko00002	-	-	-
RA01000448.1	1126627.BAWE01000004_gene2876	1.24e-313	855.0	COG1653@1|root,COG1653@2|Bacteria,1MUNZ@1224|Proteobacteria,2U05K@28211|Alphaproteobacteria,3JWRT@41294|Bradyrhizobiaceae	28211|Alphaproteobacteria	G	Bacterial extracellular solute-binding protein	-	-	-	ko:K02027	-	M00207	-	-	ko00000,ko00002,ko02000	3.A.1.1	-	SBP_bac_1,TAT_signal
RA01000449.1	1038862.KB893857_gene6794	2.51e-206	572.0	COG1175@1|root,COG1175@2|Bacteria,1MWB7@1224|Proteobacteria,2TQZY@28211|Alphaproteobacteria,3JSZ8@41294|Bradyrhizobiaceae	28211|Alphaproteobacteria	G	Binding-protein-dependent transport system inner membrane component	-	-	-	ko:K02025	-	M00207	-	-	ko00000,ko00002,ko02000	3.A.1.1	-	BPD_transp_1
RA01000450.1	443598.AUFA01000002_gene2448	3.53e-176	494.0	COG0395@1|root,COG0395@2|Bacteria,1MXTE@1224|Proteobacteria,2U09S@28211|Alphaproteobacteria,3JU5C@41294|Bradyrhizobiaceae	28211|Alphaproteobacteria	G	Binding-protein-dependent transport system inner membrane component	-	-	-	ko:K02026	-	M00207	-	-	ko00000,ko00002,ko02000	3.A.1.1	-	BPD_transp_1
RA01000451.1	335659.S23_52690	0.0	1025.0	COG0659@1|root,COG0659@2|Bacteria,1MXA7@1224|Proteobacteria,2TV6Y@28211|Alphaproteobacteria,3JU6K@41294|Bradyrhizobiaceae	28211|Alphaproteobacteria	P	secondary active sulfate transmembrane transporter activity	MA20_17540	-	-	ko:K06901	-	-	-	-	ko00000,ko02000	2.A.1.40	-	-
RA01000452.1	1038862.KB893857_gene6788	4.29e-161	451.0	COG1335@1|root,COG1335@2|Bacteria,1MV0W@1224|Proteobacteria,2TUVZ@28211|Alphaproteobacteria,3JTF1@41294|Bradyrhizobiaceae	28211|Alphaproteobacteria	Q	Isochorismatase family	MA20_17545	-	-	-	-	-	-	-	-	-	-	Isochorismatase
RA01000453.1	936455.KI421499_gene4562	6.63e-210	582.0	28HWH@1|root,2Z82E@2|Bacteria,1MUF7@1224|Proteobacteria,2TV8Z@28211|Alphaproteobacteria,3JV6A@41294|Bradyrhizobiaceae	28211|Alphaproteobacteria	-	-	-	-	-	-	-	-	-	-	-	-	-	-
RA01000454.1	1038862.KB893857_gene6786	0.0	2237.0	COG1014@1|root,COG4231@1|root,COG1014@2|Bacteria,COG4231@2|Bacteria,1MUKS@1224|Proteobacteria,2TSHH@28211|Alphaproteobacteria,3JSRZ@41294|Bradyrhizobiaceae	28211|Alphaproteobacteria	C	Pyruvate ferredoxin/flavodoxin oxidoreductase	MA20_17555	-	1.2.7.8	ko:K04090	-	-	-	-	br01601,ko00000,ko01000	-	-	POR,TPP_enzyme_C
RA01000455.1	1038862.KB893857_gene6785	0.0	1018.0	COG1053@1|root,COG1053@2|Bacteria,1MURY@1224|Proteobacteria,2TSRQ@28211|Alphaproteobacteria,3JS1F@41294|Bradyrhizobiaceae	28211|Alphaproteobacteria	C	FAD binding domain	-	-	-	-	-	-	-	-	-	-	-	FAD_binding_2
RA01000456.1	318996.AXAZ01000001_gene4668	1.09e-228	631.0	COG0265@1|root,COG0265@2|Bacteria,1N58P@1224|Proteobacteria,2TTTZ@28211|Alphaproteobacteria,3JTX9@41294|Bradyrhizobiaceae	28211|Alphaproteobacteria	O	Trypsin	MA20_17565	-	-	-	-	-	-	-	-	-	-	PDZ_2,Trypsin_2
RA01000457.1	936455.KI421499_gene4566	4.18e-91	268.0	2ERSV@1|root,33JC2@2|Bacteria,1REGE@1224|Proteobacteria,2U5F2@28211|Alphaproteobacteria,3JY5G@41294|Bradyrhizobiaceae	28211|Alphaproteobacteria	-	-	-	-	-	-	-	-	-	-	-	-	-	-
RA01000458.1	318996.AXAZ01000001_gene4666	0.0	1103.0	COG2303@1|root,COG2303@2|Bacteria,1MU3F@1224|Proteobacteria,2TT3C@28211|Alphaproteobacteria,3JRJV@41294|Bradyrhizobiaceae	28211|Alphaproteobacteria	E	GMC oxidoreductase	MA20_17575	-	-	-	-	-	-	-	-	-	-	GMC_oxred_C,GMC_oxred_N,NAD_binding_8
RA01000459.1	1038866.KB902824_gene1280	2.99e-176	492.0	COG1525@1|root,COG1525@2|Bacteria,1ND4R@1224|Proteobacteria,2U0QF@28211|Alphaproteobacteria,3JRE6@41294|Bradyrhizobiaceae	28211|Alphaproteobacteria	L	Staphylococcal nuclease homologue	MA20_17580	-	-	-	-	-	-	-	-	-	-	SNase
RA01000460.1	1038862.KB893857_gene6780	1.82e-80	239.0	COG3125@1|root,COG3125@2|Bacteria,1RHE5@1224|Proteobacteria,2U67R@28211|Alphaproteobacteria,3JYQ2@41294|Bradyrhizobiaceae	28211|Alphaproteobacteria	C	Prokaryotic Cytochrome C oxidase subunit IV	cyoD	-	-	ko:K02300	ko00190,ko01100,map00190,map01100	M00417	-	-	ko00000,ko00001,ko00002	3.D.4.5	-	COX4_pro
RA01000461.1	224911.27350972	1.14e-142	403.0	COG1845@1|root,COG1845@2|Bacteria,1RBJC@1224|Proteobacteria,2VG3K@28211|Alphaproteobacteria,3JWB3@41294|Bradyrhizobiaceae	28211|Alphaproteobacteria	C	Cytochrome c oxidase subunit III	-	-	-	ko:K02299	ko00190,ko01100,map00190,map01100	M00417	-	-	ko00000,ko00001,ko00002	3.D.4.5	-	COX3
RA01000462.1	224911.27350971	0.0	1283.0	COG0843@1|root,COG0843@2|Bacteria,1MU7S@1224|Proteobacteria,2TQP1@28211|Alphaproteobacteria,3JR26@41294|Bradyrhizobiaceae	28211|Alphaproteobacteria	C	Belongs to the heme-copper respiratory oxidase family	cyoB	GO:0003674,GO:0003824,GO:0005575,GO:0005623,GO:0005886,GO:0005887,GO:0006091,GO:0006810,GO:0006811,GO:0006812,GO:0008150,GO:0008152,GO:0009060,GO:0009486,GO:0009987,GO:0015002,GO:0015672,GO:0015980,GO:0015988,GO:0015990,GO:0016020,GO:0016021,GO:0016491,GO:0022900,GO:0022904,GO:0031224,GO:0031226,GO:0034220,GO:0044237,GO:0044425,GO:0044459,GO:0044464,GO:0045333,GO:0051179,GO:0051234,GO:0055085,GO:…	1.10.3.10	ko:K02298	ko00190,ko01100,map00190,map01100	M00417	R11335	RC00061	ko00000,ko00001,ko00002,ko01000	3.D.4.5	-	COX1
RA01000463.1	1038866.KB902824_gene1276	3.14e-190	529.0	COG1622@1|root,COG1622@2|Bacteria,1MWHZ@1224|Proteobacteria,2U0IR@28211|Alphaproteobacteria,3JS69@41294|Bradyrhizobiaceae	28211|Alphaproteobacteria	C	ubiquinol oxidase subunit	cyoA	-	1.10.3.10	ko:K02297	ko00190,ko01100,map00190,map01100	M00417	R11335	RC00061	ko00000,ko00001,ko00002,ko01000	3.D.4.5	-	COX2,COX_ARM
RA01000464.1	1038866.KB902824_gene1275	9.99e-177	494.0	COG1028@1|root,COG1028@2|Bacteria,1MUFX@1224|Proteobacteria,2TRWN@28211|Alphaproteobacteria,3JSZZ@41294|Bradyrhizobiaceae	28211|Alphaproteobacteria	IQ	Enoyl-(Acyl carrier protein) reductase	MA20_17615	-	-	-	-	-	-	-	-	-	-	adh_short_C2
RA01000465.1	319003.Bra1253DRAFT_02439	1.83e-291	800.0	COG2133@1|root,COG2133@2|Bacteria,1MVK5@1224|Proteobacteria,2TRN9@28211|Alphaproteobacteria,3JU1E@41294|Bradyrhizobiaceae	28211|Alphaproteobacteria	G	Glucose / Sorbosone dehydrogenase	-	-	-	-	-	-	-	-	-	-	-	GSDH
RA01000466.1	318996.AXAZ01000001_gene4658	6.18e-282	771.0	COG3748@1|root,COG3748@2|Bacteria,1MWHB@1224|Proteobacteria,2TSXN@28211|Alphaproteobacteria,3JVRH@41294|Bradyrhizobiaceae	28211|Alphaproteobacteria	S	Urate oxidase N-terminal	MA20_17625	-	-	-	-	-	-	-	-	-	-	Urate_ox_N
RA01000467.1	224911.27350963	1.67e-189	528.0	COG0346@1|root,COG0346@2|Bacteria,1MZT5@1224|Proteobacteria,2U4GS@28211|Alphaproteobacteria,3JV3A@41294|Bradyrhizobiaceae	28211|Alphaproteobacteria	E	Glyoxalase-like domain	-	-	-	-	-	-	-	-	-	-	-	Glyoxalase_3
RA01000468.1	936455.KI421499_gene4578	2.17e-61	188.0	2ABSS@1|root,32BCV@2|Bacteria,1RIVA@1224|Proteobacteria,2UAMH@28211|Alphaproteobacteria,3JZD8@41294|Bradyrhizobiaceae	28211|Alphaproteobacteria	-	-	MA20_17635	-	-	-	-	-	-	-	-	-	-	-
RA01000469.1	1038866.KB902824_gene1270	6.07e-215	597.0	COG1376@1|root,COG1376@2|Bacteria,1MVI4@1224|Proteobacteria,2TSSC@28211|Alphaproteobacteria,3JW5I@41294|Bradyrhizobiaceae	28211|Alphaproteobacteria	M	L,D-transpeptidase catalytic domain	-	-	-	-	-	-	-	-	-	-	-	PG_binding_1,YkuD
RA01000470.1	319003.Bra1253DRAFT_02444	6.49e-188	526.0	COG0741@1|root,COG0741@2|Bacteria,1MZ4X@1224|Proteobacteria,2U5GT@28211|Alphaproteobacteria,3JUNK@41294|Bradyrhizobiaceae	28211|Alphaproteobacteria	M	Transglycosylase SLT domain	-	-	-	-	-	-	-	-	-	-	-	SLT
RA01000471.1	318996.AXAZ01000001_gene4655	2.92e-109	329.0	COG3064@1|root,COG3064@2|Bacteria,1MXS9@1224|Proteobacteria,2TVG0@28211|Alphaproteobacteria,3JV7X@41294|Bradyrhizobiaceae	28211|Alphaproteobacteria	M	Protein of unknown function (DUF1236)	-	-	-	-	-	-	-	-	-	-	-	DUF1236
RA01000472.1	1038862.KB893857_gene6769	8.54e-82	244.0	COG4119@1|root,COG4119@2|Bacteria,1RHCE@1224|Proteobacteria,2U8N1@28211|Alphaproteobacteria,3JY5Z@41294|Bradyrhizobiaceae	28211|Alphaproteobacteria	L	NUDIX domain	-	-	-	-	-	-	-	-	-	-	-	NUDIX
RA01000473.1	1038862.KB893857_gene6767	3.78e-207	576.0	COG3181@1|root,COG3181@2|Bacteria,1MU58@1224|Proteobacteria,2TQWK@28211|Alphaproteobacteria,3JW1A@41294|Bradyrhizobiaceae	28211|Alphaproteobacteria	S	Tripartite tricarboxylate transporter family receptor	MA20_17650	-	-	-	-	-	-	-	-	-	-	TctC
RA01000474.1	1038862.KB893857_gene6766	1.76e-92	276.0	2EBY0@1|root,335XC@2|Bacteria,1RGD9@1224|Proteobacteria,2U24N@28211|Alphaproteobacteria,3JRU0@41294|Bradyrhizobiaceae	28211|Alphaproteobacteria	-	-	-	-	-	-	-	-	-	-	-	-	-	-
RA01000475.1	443598.AUFA01000002_gene2417	2.67e-34	119.0	COG3131@1|root,COG3131@2|Bacteria,1N8PC@1224|Proteobacteria,2UGG1@28211|Alphaproteobacteria,3K1CQ@41294|Bradyrhizobiaceae	28211|Alphaproteobacteria	P	Involved in the biosynthesis of osmoregulated periplasmic glucans (OPGs)	-	-	-	-	-	-	-	-	-	-	-	-
RA01000476.1	224911.27350957	0.0	1545.0	COG1752@1|root,COG1752@2|Bacteria,1Q82E@1224|Proteobacteria,2TU9N@28211|Alphaproteobacteria,3JTC1@41294|Bradyrhizobiaceae	28211|Alphaproteobacteria	S	Esterase of the alpha-beta hydrolase superfamily	-	-	-	-	-	-	-	-	-	-	-	Patatin
RA01000477.1	1038866.KB902824_gene1259	7.47e-281	776.0	COG3025@1|root,COG5607@1|root,COG3025@2|Bacteria,COG5607@2|Bacteria,1MY43@1224|Proteobacteria,2TQRV@28211|Alphaproteobacteria,3JTZA@41294|Bradyrhizobiaceae	28211|Alphaproteobacteria	S	CYTH	-	-	-	-	-	-	-	-	-	-	-	CHAD,CYTH
RA01000478.1	318996.AXAZ01000001_gene4649	4.95e-81	241.0	2E3MT@1|root,32YK0@2|Bacteria,1RG5Y@1224|Proteobacteria,2U7Q9@28211|Alphaproteobacteria,3JZ07@41294|Bradyrhizobiaceae	28211|Alphaproteobacteria	S	Avidin family	-	-	-	-	-	-	-	-	-	-	-	Avidin
RA01000479.1	1037409.BJ6T_70800	6.93e-254	701.0	COG0477@1|root,COG2814@2|Bacteria,1QUY6@1224|Proteobacteria,2TWZ0@28211|Alphaproteobacteria,3JQS0@41294|Bradyrhizobiaceae	28211|Alphaproteobacteria	EGP	Major Facilitator Superfamily	-	-	-	-	-	-	-	-	-	-	-	MFS_1
RA01000480.1	1038862.KB893847_gene5933	3.04e-278	761.0	COG2195@1|root,COG2195@2|Bacteria,1MV7D@1224|Proteobacteria,2U0U8@28211|Alphaproteobacteria,3JWJR@41294|Bradyrhizobiaceae	28211|Alphaproteobacteria	E	M42 glutamyl aminopeptidase	MA20_17715	-	3.4.11.4	ko:K01258	-	-	-	-	ko00000,ko01000,ko01002	-	-	M20_dimer,Peptidase_M20,Peptidase_M28,Peptidase_M42
RA01000481.1	335659.S23_52980	8.72e-258	707.0	COG4948@1|root,COG4948@2|Bacteria,1MYZE@1224|Proteobacteria,2TU3A@28211|Alphaproteobacteria,3JSFN@41294|Bradyrhizobiaceae	28211|Alphaproteobacteria	M	Mandelate racemase muconate lactonizing enzyme	MA20_17725	-	4.2.1.156,4.2.1.42,5.1.2.2	ko:K01781,ko:K20023	ko00053,ko00627,ko01120,map00053,map00627,map01120	-	R03791,R04161,R05608	RC00543,RC00998	ko00000,ko00001,ko01000	-	-	MR_MLE_C,MR_MLE_N
RA01000482.1	936455.KI421499_gene4593	6.44e-255	702.0	COG1473@1|root,COG1473@2|Bacteria,1MUIV@1224|Proteobacteria,2TR5B@28211|Alphaproteobacteria,3JSSZ@41294|Bradyrhizobiaceae	28211|Alphaproteobacteria	S	Peptidase dimerisation domain	-	-	-	-	-	-	-	-	-	-	-	M20_dimer,Peptidase_M20
RA01000483.1	319003.Bra1253DRAFT_02470	5.38e-173	483.0	COG1801@1|root,COG1801@2|Bacteria,1MU7F@1224|Proteobacteria,2TT1D@28211|Alphaproteobacteria,3JTPG@41294|Bradyrhizobiaceae	28211|Alphaproteobacteria	S	Protein of unknown function DUF72	-	-	-	-	-	-	-	-	-	-	-	DUF72
RA01000484.1	1038866.KB902824_gene1240	4.11e-27	99.4	2AXIC@1|root,31PI4@2|Bacteria,1NHM8@1224|Proteobacteria,2UGD0@28211|Alphaproteobacteria,3K5WF@41294|Bradyrhizobiaceae	28211|Alphaproteobacteria	-	-	-	-	-	-	-	-	-	-	-	-	-	-
RA01000485.1	1037409.BJ6T_31140	6.96e-26	98.2	2EH5K@1|root,314JM@2|Bacteria,1NAK4@1224|Proteobacteria,2UGR9@28211|Alphaproteobacteria,3K12Q@41294|Bradyrhizobiaceae	28211|Alphaproteobacteria	-	-	-	-	-	-	-	-	-	-	-	-	-	-
RA01000486.1	1038866.KB902824_gene1238	3.18e-96	281.0	COG0071@1|root,COG0071@2|Bacteria,1RH2X@1224|Proteobacteria,2U96D@28211|Alphaproteobacteria,3JYBC@41294|Bradyrhizobiaceae	28211|Alphaproteobacteria	O	Hsp20/alpha crystallin family	ibpA	-	-	ko:K04080	-	-	-	-	ko00000,ko03110	-	-	HSP20
RA01000487.1	1038866.KB902824_gene1237	1.02e-37	132.0	2EH5K@1|root,33AXH@2|Bacteria,1RJRX@1224|Proteobacteria,2UB40@28211|Alphaproteobacteria,3JZR3@41294|Bradyrhizobiaceae	28211|Alphaproteobacteria	-	-	-	-	-	-	-	-	-	-	-	-	-	-
RA01000488.1	172088.AUGA01000024_gene843	1.05e-136	388.0	COG0583@1|root,COG0583@2|Bacteria,1PQWH@1224|Proteobacteria,2TU1R@28211|Alphaproteobacteria,3JT3U@41294|Bradyrhizobiaceae	28211|Alphaproteobacteria	K	Bacterial regulatory helix-turn-helix protein, lysR family	-	-	-	-	-	-	-	-	-	-	-	HTH_1
RA01000489.1	189753.AXAS01000017_gene3041	9.89e-134	381.0	2DPHF@1|root,33237@2|Bacteria,1R4GY@1224|Proteobacteria,2TUGA@28211|Alphaproteobacteria,3JSZU@41294|Bradyrhizobiaceae	28211|Alphaproteobacteria	S	L-2-amino-thiazoline-4-carboxylic acid hydrolase	-	-	-	-	-	-	-	-	-	-	-	ATC_hydrolase
RA01000490.1	319003.Bra1253DRAFT_01773	1.96e-169	498.0	COG4191@1|root,COG4191@2|Bacteria,1RCM9@1224|Proteobacteria,2TR8X@28211|Alphaproteobacteria,3JW86@41294|Bradyrhizobiaceae	28211|Alphaproteobacteria	T	Membrane-associated sensor, integral membrane domain	-	-	-	-	-	-	-	-	-	-	-	HATPase_c,HisKA,MASE4
RA01000493.1	318996.AXAZ01000001_gene4638	5.71e-282	771.0	COG1804@1|root,COG1804@2|Bacteria,1MVK4@1224|Proteobacteria,2TWRE@28211|Alphaproteobacteria,3JSRH@41294|Bradyrhizobiaceae	28211|Alphaproteobacteria	C	CoA-transferase family III	MA20_17775	-	-	-	-	-	-	-	-	-	-	CoA_transf_3
RA01000494.1	319003.Bra1253DRAFT_02472	2.94e-204	566.0	COG0346@1|root,COG0346@2|Bacteria,1MX75@1224|Proteobacteria,2TRQS@28211|Alphaproteobacteria,3JUA0@41294|Bradyrhizobiaceae	28211|Alphaproteobacteria	E	lactoylglutathione lyase activity	-	-	-	-	-	-	-	-	-	-	-	-
RA01000495.1	189753.AXAS01000018_gene3202	5.07e-266	731.0	COG1960@1|root,COG1960@2|Bacteria,1MX17@1224|Proteobacteria,2TTRE@28211|Alphaproteobacteria,3JYE6@41294|Bradyrhizobiaceae	28211|Alphaproteobacteria	I	Acyl-CoA dehydrogenase, C-terminal domain	-	-	3.13.1.4	ko:K19966	-	-	-	-	ko00000,ko01000	-	-	Acyl-CoA_dh_1,Acyl-CoA_dh_M,Acyl-CoA_dh_N
RA01000496.1	189753.AXAS01000018_gene3201	3.37e-22	90.5	COG2128@1|root,COG2128@2|Bacteria,1MUDM@1224|Proteobacteria,2TTY5@28211|Alphaproteobacteria,3JSMD@41294|Bradyrhizobiaceae	28211|Alphaproteobacteria	S	Antioxidant protein with alkyl hydroperoxidase activity. Required for the reduction of the AhpC active site cysteine residues and for the regeneration of the AhpC enzyme activity	-	-	-	-	-	-	-	-	-	-	-	CMD
RA01000497.1	1038862.KB893854_gene53	8.29e-151	425.0	COG1917@1|root,COG1917@2|Bacteria,1QU6U@1224|Proteobacteria,2TY5T@28211|Alphaproteobacteria,3JQM4@41294|Bradyrhizobiaceae	28211|Alphaproteobacteria	S	ChrR Cupin-like domain	-	-	-	-	-	-	-	-	-	-	-	Cupin_7
RA01000500.1	1038867.AXAY01000003_gene2936	2.95e-46	179.0	COG4191@1|root,COG4191@2|Bacteria,1RCM9@1224|Proteobacteria,2TR8X@28211|Alphaproteobacteria,3JRJI@41294|Bradyrhizobiaceae	28211|Alphaproteobacteria	T	Histidine kinase-like ATPases	-	-	-	-	-	-	-	-	-	-	-	DUF4118,HATPase_c,HisKA,PAS_3,PAS_9
RA01000501.1	1230476.C207_04589	6.04e-15	70.5	2AEI2@1|root,314DF@2|Bacteria,1N9XT@1224|Proteobacteria,2UFNQ@28211|Alphaproteobacteria,3K1C4@41294|Bradyrhizobiaceae	28211|Alphaproteobacteria	-	-	-	-	-	-	-	-	-	-	-	-	-	-
RA01000502.1	189753.AXAS01000059_gene272	5.1e-267	734.0	COG0156@1|root,COG0156@2|Bacteria,1MVVH@1224|Proteobacteria,2TQXI@28211|Alphaproteobacteria,3JSGC@41294|Bradyrhizobiaceae	28211|Alphaproteobacteria	E	5-aminolevulinic acid synthase	hemA	-	2.3.1.37	ko:K00643	ko00260,ko00860,ko01100,ko01110,map00260,map00860,map01100,map01110	-	R00830	RC00004,RC02815	ko00000,ko00001,ko01000,ko01007	-	-	Aminotran_1_2
RA01000503.1	1380355.JNIJ01000040_gene5213	5.88e-38	127.0	2A6ZH@1|root,30VUM@2|Bacteria,1N1Y2@1224|Proteobacteria,2UBS5@28211|Alphaproteobacteria,3K022@41294|Bradyrhizobiaceae	28211|Alphaproteobacteria	-	-	-	-	-	-	-	-	-	-	-	-	-	-
RA01000505.1	1040989.AWZU01000085_gene3385	2.62e-40	134.0	2BVK6@1|root,33CZG@2|Bacteria,1NEVJ@1224|Proteobacteria,2UFNA@28211|Alphaproteobacteria,3K1EP@41294|Bradyrhizobiaceae	28211|Alphaproteobacteria	-	-	-	-	-	-	-	-	-	-	-	-	-	-
RA01000506.1	319003.Bra1253DRAFT_00335	5.88e-23	89.7	2BMP8@1|root,32G8J@2|Bacteria,1P96I@1224|Proteobacteria,2UWKC@28211|Alphaproteobacteria,3K5PS@41294|Bradyrhizobiaceae	28211|Alphaproteobacteria	-	-	-	-	-	-	-	-	-	-	-	-	-	-
RA01000507.1	311403.Arad_8257	3.75e-52	176.0	COG4566@1|root,COG4566@2|Bacteria,1R47Z@1224|Proteobacteria,2TSQS@28211|Alphaproteobacteria,4BBK0@82115|Rhizobiaceae	28211|Alphaproteobacteria	T	helix_turn_helix, Lux Regulon	nodW	-	-	-	-	-	-	-	-	-	-	GerE,Response_reg
RA01000508.1	936455.KI421499_gene4612	3.28e-125	360.0	COG0378@1|root,COG0378@2|Bacteria,1MVBD@1224|Proteobacteria,2TQMU@28211|Alphaproteobacteria,3K3EM@41294|Bradyrhizobiaceae	28211|Alphaproteobacteria	KO	CobW/HypB/UreG, nucleotide-binding domain	ureG	-	-	ko:K03189	-	-	-	-	ko00000	-	-	cobW
RA01000509.1	936455.KI421499_gene4613	7.36e-109	320.0	COG0830@1|root,COG0830@2|Bacteria,1MW8Q@1224|Proteobacteria,2TRVW@28211|Alphaproteobacteria,3K351@41294|Bradyrhizobiaceae	28211|Alphaproteobacteria	O	UreF	ureF	-	-	ko:K03188	-	-	-	-	ko00000	-	-	UreF
RA01000510.1	189753.AXAS01000055_gene5713	0.0	1008.0	COG0804@1|root,COG0804@2|Bacteria,1MU5P@1224|Proteobacteria,2TSXP@28211|Alphaproteobacteria,3JSH3@41294|Bradyrhizobiaceae	28211|Alphaproteobacteria	E	Urease alpha-subunit, N-terminal domain	ureC	-	3.5.1.5	ko:K01428	ko00220,ko00230,ko00791,ko01100,ko01120,ko05120,map00220,map00230,map00791,map01100,map01120,map05120	-	R00131	RC02798,RC02806	ko00000,ko00001,ko01000	-	-	Amidohydro_1,Urease_alpha,Urease_beta
RA01000511.1	1038860.AXAP01000033_gene4473	1.1e-51	165.0	COG0832@1|root,COG0832@2|Bacteria,1RGW0@1224|Proteobacteria,2U9T4@28211|Alphaproteobacteria,3K0N2@41294|Bradyrhizobiaceae	28211|Alphaproteobacteria	E	Urease beta subunit	ureB	-	3.5.1.5	ko:K01429	ko00220,ko00230,ko00791,ko01100,ko01120,map00220,map00230,map00791,map01100,map01120	-	R00131	RC02798,RC02806	ko00000,ko00001,ko01000	-	-	Urease_beta
RA01000512.1	1037409.BJ6T_85190	3.33e-51	170.0	COG2370@1|root,COG2370@2|Bacteria,1Q9MX@1224|Proteobacteria,2UQJZ@28211|Alphaproteobacteria,3K2AW@41294|Bradyrhizobiaceae	28211|Alphaproteobacteria	O	HupE / UreJ protein	-	-	-	ko:K03192	-	-	-	-	ko00000	-	-	HupE_UreJ
RA01000513.1	388401.RB2150_08583	4.68e-49	157.0	COG0831@1|root,COG0831@2|Bacteria,1RGXE@1224|Proteobacteria,2U947@28211|Alphaproteobacteria,3ZHRI@58840|unclassified Rhodobacteraceae	28211|Alphaproteobacteria	E	Belongs to the urease gamma subunit family	ureA	-	3.5.1.5	ko:K01430,ko:K14048	ko00220,ko00230,ko00791,ko01100,ko01120,ko05120,map00220,map00230,map00791,map01100,map01120,map05120	-	R00131	RC02798,RC02806	ko00000,ko00001,ko01000	-	-	Urease_beta,Urease_gamma
RA01000514.1	936455.KI421499_gene4618	6.84e-114	336.0	COG0829@1|root,COG0829@2|Bacteria,1RABD@1224|Proteobacteria,2UBH0@28211|Alphaproteobacteria,3K2N8@41294|Bradyrhizobiaceae	28211|Alphaproteobacteria	O	UreD urease accessory protein	-	-	-	ko:K03190	-	-	-	-	ko00000	-	-	UreD
RA01000515.1	1038860.AXAP01000033_gene4474	6.29e-272	748.0	COG2706@1|root,COG2706@2|Bacteria,1MWTE@1224|Proteobacteria,2U3R7@28211|Alphaproteobacteria,3JVJF@41294|Bradyrhizobiaceae	28211|Alphaproteobacteria	G	6-phosphogluconolactonase activity	-	-	-	-	-	-	-	-	-	-	-	Lactonase
RA01000516.1	1037409.BJ6T_85230	6.89e-93	276.0	COG3474@1|root,COG3474@2|Bacteria,1RI3E@1224|Proteobacteria,2U2DT@28211|Alphaproteobacteria,3JZ8R@41294|Bradyrhizobiaceae	28211|Alphaproteobacteria	C	Cytochrome P460	-	-	-	ko:K08738	ko00920,ko01100,ko01120,ko01524,ko02020,ko04115,ko04210,ko04214,ko04215,ko04932,ko05010,ko05012,ko05014,ko05016,ko05134,ko05145,ko05152,ko05161,ko05164,ko05167,ko05168,ko05200,ko05210,ko05222,ko05416,map00920,map01100,map01120,map01524,map02020,map04115,map04210,map04214,map04215,map04932,map05010,map05012,map05014,map05016,map05134,map05145,map05152,map05161,map05164,map05167,map05168,map05200,m…	M00595	R10151	RC03151,RC03152	ko00000,ko00001,ko00002	3.D.4.6	-	Cytochrom_C,Cytochrome_P460
RA01000517.1	1037409.BJ6T_85240	4.16e-131	373.0	COG3474@1|root,COG3474@2|Bacteria,1QWSY@1224|Proteobacteria,2U23C@28211|Alphaproteobacteria,3JWMD@41294|Bradyrhizobiaceae	28211|Alphaproteobacteria	C	Cytochrome P460	-	-	-	-	-	-	-	-	-	-	-	Cytochrome_P460
RA01000518.1	1037409.BJ6T_85250	0.0	902.0	COG0154@1|root,COG0154@2|Bacteria,1MW3Z@1224|Proteobacteria,2TS56@28211|Alphaproteobacteria,3K3IY@41294|Bradyrhizobiaceae	28211|Alphaproteobacteria	J	Amidase	-	-	6.3.5.6,6.3.5.7	ko:K02433	ko00970,ko01100,map00970,map01100	-	R03905,R04212	RC00010	ko00000,ko00001,ko01000,ko03029	-	-	Amidase
RA01000519.1	1037409.BJ6T_85260	2.16e-68	211.0	COG2041@1|root,COG2041@2|Bacteria,1RADR@1224|Proteobacteria,2U6HX@28211|Alphaproteobacteria,3JYKV@41294|Bradyrhizobiaceae	28211|Alphaproteobacteria	S	Oxidoreductase molybdopterin binding domain	-	-	-	-	-	-	-	-	-	-	-	Oxidored_molyb
RA01000520.1	1037409.BJ6T_85260	2.32e-43	145.0	COG2041@1|root,COG2041@2|Bacteria,1RADR@1224|Proteobacteria,2U6HX@28211|Alphaproteobacteria,3JYKV@41294|Bradyrhizobiaceae	28211|Alphaproteobacteria	S	Oxidoreductase molybdopterin binding domain	-	-	-	-	-	-	-	-	-	-	-	Oxidored_molyb
RA01000521.1	936455.KI421499_gene4624	8.52e-139	397.0	COG1018@1|root,COG1018@2|Bacteria,1R5FN@1224|Proteobacteria,2U080@28211|Alphaproteobacteria,3JWEH@41294|Bradyrhizobiaceae	28211|Alphaproteobacteria	C	Oxidoreductase FAD-binding domain	-	-	-	-	-	-	-	-	-	-	-	FAD_binding_6,NAD_binding_1
RA01000522.1	936455.KI421499_gene4625	4.37e-40	134.0	2AKE5@1|root,31B5E@2|Bacteria,1NYDX@1224|Proteobacteria,2UTVE@28211|Alphaproteobacteria,3K4IZ@41294|Bradyrhizobiaceae	28211|Alphaproteobacteria	-	-	-	-	-	-	-	-	-	-	-	-	-	-
RA01000524.1	1380355.JNIJ01000015_gene5943	3.29e-191	533.0	COG2343@1|root,COG2343@2|Bacteria,1RG3V@1224|Proteobacteria,2TWUA@28211|Alphaproteobacteria,3JSTA@41294|Bradyrhizobiaceae	28211|Alphaproteobacteria	S	Domain of unknown function (DUF427)	-	-	-	-	-	-	-	-	-	-	-	NTP_transf_9
RA01000525.1	1038860.AXAP01000036_gene3345	0.0	986.0	COG1018@1|root,COG2258@1|root,COG1018@2|Bacteria,COG2258@2|Bacteria,1MV41@1224|Proteobacteria,2TQXP@28211|Alphaproteobacteria,3JVF5@41294|Bradyrhizobiaceae	28211|Alphaproteobacteria	C	Oxidoreductase NAD-binding domain	-	-	-	ko:K02613	ko00360,ko01120,map00360,map01120	-	R09838	RC02690	ko00000,ko00001	-	-	3-alpha,FAD_binding_6,Fer2,MOSC,NAD_binding_1,Putative_PNPOx
RA01000526.1	1298867.AUES01000023_gene2746	5.99e-46	178.0	COG4191@1|root,COG5000@1|root,COG4191@2|Bacteria,COG5000@2|Bacteria,1RCM9@1224|Proteobacteria,2TQQ9@28211|Alphaproteobacteria,3JR0R@41294|Bradyrhizobiaceae	28211|Alphaproteobacteria	T	Response regulator receiver	-	-	-	-	-	-	-	-	-	-	-	HATPase_c,HisKA,MASE4,PAS,PAS_3,PAS_4,PAS_9,Response_reg
RA01000527.1	113395.AXAI01000012_gene7051	1.15e-105	309.0	COG3548@1|root,COG3548@2|Bacteria,1R9WQ@1224|Proteobacteria,2U7RR@28211|Alphaproteobacteria,3JYAW@41294|Bradyrhizobiaceae	28211|Alphaproteobacteria	S	Protein of unknown function (DUF1211)	-	-	-	-	-	-	-	-	-	-	-	DUF1211
RA01000528.1	196490.AUEZ01000004_gene4066	3.49e-249	694.0	COG1249@1|root,COG1249@2|Bacteria,1MU2U@1224|Proteobacteria,2TU0K@28211|Alphaproteobacteria,3JUIP@41294|Bradyrhizobiaceae	28211|Alphaproteobacteria	C	Pyridine nucleotide-disulphide oxidoreductase, dimerisation domain	-	-	-	-	-	-	-	-	-	-	-	Pyr_redox_2,Pyr_redox_dim
RA01000529.1	113395.AXAI01000017_gene4669	7.33e-189	526.0	COG0596@1|root,COG0596@2|Bacteria,1MUSF@1224|Proteobacteria,2TSK5@28211|Alphaproteobacteria,3JRAN@41294|Bradyrhizobiaceae	28211|Alphaproteobacteria	S	Alpha/beta hydrolase family	-	-	-	-	-	-	-	-	-	-	-	Abhydrolase_1
RA01000530.1	1037409.BJ6T_85350	3.84e-164	464.0	COG2207@1|root,COG2207@2|Bacteria,1RJPK@1224|Proteobacteria,2TV79@28211|Alphaproteobacteria,3JZ7H@41294|Bradyrhizobiaceae	28211|Alphaproteobacteria	K	helix_turn_helix, arabinose operon control protein	-	-	-	ko:K07506	-	-	-	-	ko00000,ko03000	-	-	HTH_18
RA01000531.1	113395.AXAI01000017_gene4670	1.22e-90	270.0	COG4566@1|root,COG4566@2|Bacteria,1NUYF@1224|Proteobacteria,2URKS@28211|Alphaproteobacteria,3K3XG@41294|Bradyrhizobiaceae	28211|Alphaproteobacteria	T	helix_turn_helix, Lux Regulon	-	-	-	-	-	-	-	-	-	-	-	GerE,Response_reg
RA01000532.1	936455.KI421499_gene4631	7.08e-264	736.0	COG4191@1|root,COG4191@2|Bacteria,1MYVT@1224|Proteobacteria,2UAYQ@28211|Alphaproteobacteria,3JZPB@41294|Bradyrhizobiaceae	28211|Alphaproteobacteria	T	PAS fold	-	-	-	-	-	-	-	-	-	-	-	HATPase_c,PAS_3
RA01000533.1	1037409.BJ6T_85410	7.81e-102	296.0	COG3059@1|root,COG3059@2|Bacteria,1PKIX@1224|Proteobacteria,2TSEX@28211|Alphaproteobacteria,3JVSQ@41294|Bradyrhizobiaceae	28211|Alphaproteobacteria	S	Protein of unknown function, DUF417	-	-	-	-	-	-	-	-	-	-	-	DUF417
RA01000534.1	936455.KI421499_gene4634	4.07e-76	236.0	COG3920@1|root,COG3920@2|Bacteria,1NRY4@1224|Proteobacteria,2UNRJ@28211|Alphaproteobacteria,3K2GC@41294|Bradyrhizobiaceae	28211|Alphaproteobacteria	T	HWE histidine kinase	-	-	-	-	-	-	-	-	-	-	-	HWE_HK
RA01000536.1	936455.KI421499_gene4636	5.91e-90	266.0	COG1595@1|root,COG1595@2|Bacteria,1MVS7@1224|Proteobacteria,2U5A2@28211|Alphaproteobacteria,3JYG1@41294|Bradyrhizobiaceae	28211|Alphaproteobacteria	K	Sigma-70 region 2	-	-	-	ko:K03088	-	-	-	-	ko00000,ko03021	-	-	Sigma70_r2,Sigma70_r4_2
RA01000537.1	1037409.BJ6T_85460	7.6e-67	204.0	COG4566@1|root,COG4566@2|Bacteria,1NZ3V@1224|Proteobacteria,2UTKI@28211|Alphaproteobacteria,3K4BZ@41294|Bradyrhizobiaceae	28211|Alphaproteobacteria	T	cheY-homologous receiver domain	-	-	-	-	-	-	-	-	-	-	-	Response_reg
RA01000538.1	936455.KI421499_gene4637	9.52e-97	284.0	COG3059@1|root,COG3059@2|Bacteria,1RCNH@1224|Proteobacteria,2U5CG@28211|Alphaproteobacteria,3JYAU@41294|Bradyrhizobiaceae	28211|Alphaproteobacteria	S	Protein of unknown function, DUF417	-	-	-	-	-	-	-	-	-	-	-	DUF417
RA01000539.1	113395.AXAI01000017_gene4675	7.31e-131	375.0	COG1011@1|root,COG1011@2|Bacteria,1MVWN@1224|Proteobacteria,2TWR7@28211|Alphaproteobacteria,3K6MR@41294|Bradyrhizobiaceae	28211|Alphaproteobacteria	S	Haloacid dehalogenase-like hydrolase	-	-	3.8.1.2	ko:K01560	ko00361,ko00625,ko01100,ko01120,map00361,map00625,map01100,map01120	-	R05287	RC00697	ko00000,ko00001,ko01000	-	-	HAD_2
RA01000540.1	113395.AXAI01000017_gene4676	5.58e-149	422.0	2DB8V@1|root,2Z7SX@2|Bacteria,1MX06@1224|Proteobacteria,2U56J@28211|Alphaproteobacteria,3JWVP@41294|Bradyrhizobiaceae	28211|Alphaproteobacteria	S	Gluconate 2-dehydrogenase subunit 3	-	-	1.1.99.3	ko:K06152	ko00030,ko01100,ko01120,map00030,map01100,map01120	-	R01741	RC00084	ko00000,ko00001,ko01000	-	-	Gluconate_2-dh3
RA01000541.1	113395.AXAI01000017_gene4677	0.0	1164.0	COG2303@1|root,COG2303@2|Bacteria,1MU3F@1224|Proteobacteria,2TT3C@28211|Alphaproteobacteria,3JV5Y@41294|Bradyrhizobiaceae	28211|Alphaproteobacteria	E	GMC oxidoreductase	-	-	1.1.99.3	ko:K06151	ko00030,ko01100,ko01120,map00030,map01100,map01120	-	R01741	RC00084	ko00000,ko00001,ko01000	-	-	GMC_oxred_C,GMC_oxred_N
RA01000542.1	113395.AXAI01000017_gene4678	3.47e-254	703.0	COG2010@1|root,COG2010@2|Bacteria,1MV6D@1224|Proteobacteria,2TT9U@28211|Alphaproteobacteria,3JR14@41294|Bradyrhizobiaceae	28211|Alphaproteobacteria	C	Cytochrome C oxidase, cbb3-type, subunit III	-	-	-	-	-	-	-	-	-	-	-	Cytochrom_C
RA01000543.1	319003.Bra1253DRAFT_00345	0.0	2336.0	COG0515@1|root,COG2203@1|root,COG3899@1|root,COG4191@1|root,COG0515@2|Bacteria,COG2203@2|Bacteria,COG3899@2|Bacteria,COG4191@2|Bacteria,1RCM9@1224|Proteobacteria,2TQX3@28211|Alphaproteobacteria,3JR5W@41294|Bradyrhizobiaceae	28211|Alphaproteobacteria	T	Histidine kinase-like ATPases	-	-	-	-	-	-	-	-	-	-	-	AAA_16,GAF,GAF_2,HATPase_c,HisKA,PAS,PAS_3,PAS_9,Pkinase
RA01000544.1	936455.KI421499_gene4647	1.24e-156	444.0	COG3545@1|root,COG3545@2|Bacteria,1R20D@1224|Proteobacteria,2TZ8G@28211|Alphaproteobacteria,3K6Z0@41294|Bradyrhizobiaceae	28211|Alphaproteobacteria	S	Alpha/beta hydrolase family	-	-	-	-	-	-	-	-	-	-	-	Abhydrolase_6
RA01000545.1	936455.KI421499_gene4648	9.97e-223	616.0	COG0596@1|root,COG0596@2|Bacteria,1MUVB@1224|Proteobacteria,2TREP@28211|Alphaproteobacteria,3JR8A@41294|Bradyrhizobiaceae	28211|Alphaproteobacteria	S	Alpha/beta hydrolase family	-	-	3.8.1.3	ko:K01561	ko00361,ko00625,ko01100,ko01120,map00361,map00625,map01100,map01120	-	R05287	RC00697	ko00000,ko00001,ko01000	-	-	Abhydrolase_1
RA01000546.1	1038860.AXAP01000040_gene2860	2.7e-39	147.0	COG1960@1|root,COG1960@2|Bacteria,1MXMQ@1224|Proteobacteria,2U0CV@28211|Alphaproteobacteria,3JVSW@41294|Bradyrhizobiaceae	28211|Alphaproteobacteria	I	Acyl-CoA dehydrogenase, C-terminal domain	-	-	1.14.13.235	ko:K22027	-	-	-	-	ko00000,ko01000	-	-	Acyl-CoA_dh_2,Acyl-CoA_dh_N
RA01000548.1	1304878.AUGD01000011_gene4732	9.18e-151	432.0	2C6PG@1|root,3301K@2|Bacteria,1NU5H@1224|Proteobacteria,2V4DV@28211|Alphaproteobacteria,3K2EM@41294|Bradyrhizobiaceae	28211|Alphaproteobacteria	-	-	-	-	-	-	-	-	-	-	-	-	-	-
RA01000552.1	1038862.KB893917_gene4246	0.0	1097.0	COG1960@1|root,COG1960@2|Bacteria,1MU20@1224|Proteobacteria,2TQJS@28211|Alphaproteobacteria,3JR5D@41294|Bradyrhizobiaceae	28211|Alphaproteobacteria	I	acyl-CoA dehydrogenase	mmgC	-	1.3.8.1,1.3.8.7	ko:K00248,ko:K00249,ko:K20035	ko00071,ko00280,ko00410,ko00640,ko00650,ko00920,ko01100,ko01110,ko01120,ko01130,ko01200,ko01212,ko03320,map00071,map00280,map00410,map00640,map00650,map00920,map01100,map01110,map01120,map01130,map01200,map01212,map03320	M00013,M00036,M00087	R00924,R01175,R01178,R01279,R02661,R03172,R03777,R03857,R03990,R04095,R04432,R04751,R04754,R11130	RC00052,RC00068,RC00076,RC00095,RC00120,RC00148,RC00246,RC03363	ko00000,ko00001,ko00002,ko01000	-	-	Acyl-CoA_dh_1,Acyl-CoA_dh_C,Acyl-CoA_dh_M,Acyl-CoA_dh_N,AcylCoA_DH_N
RA01000553.1	1038866.KB902824_gene1189	8.78e-250	694.0	COG0477@1|root,COG2814@2|Bacteria,1P6NN@1224|Proteobacteria,2U29G@28211|Alphaproteobacteria,3JX8Y@41294|Bradyrhizobiaceae	28211|Alphaproteobacteria	EGP	Major Facilitator Superfamily	-	-	-	-	-	-	-	-	-	-	-	MFS_1
RA01000554.1	936455.KI421499_gene4652	1.07e-164	462.0	COG1024@1|root,COG1024@2|Bacteria,1Q67Q@1224|Proteobacteria,2U2T5@28211|Alphaproteobacteria,3JRE3@41294|Bradyrhizobiaceae	28211|Alphaproteobacteria	I	Enoyl-CoA hydratase/isomerase	-	-	-	-	-	-	-	-	-	-	-	ECH_1
RA01000555.1	1037409.BJ6T_71460	0.0	1006.0	COG0737@1|root,COG0737@2|Bacteria,1MX03@1224|Proteobacteria,2TTUP@28211|Alphaproteobacteria,3JTA0@41294|Bradyrhizobiaceae	28211|Alphaproteobacteria	F	Belongs to the 5'-nucleotidase family	MA20_07595	GO:0003674,GO:0003824,GO:0005575,GO:0005622,GO:0005623,GO:0005634,GO:0005654,GO:0005737,GO:0005829,GO:0005886,GO:0006139,GO:0006163,GO:0006195,GO:0006213,GO:0006259,GO:0006725,GO:0006732,GO:0006733,GO:0006753,GO:0006793,GO:0006796,GO:0006807,GO:0007155,GO:0007159,GO:0008150,GO:0008152,GO:0008252,GO:0008253,GO:0009056,GO:0009058,GO:0009116,GO:0009117,GO:0009164,GO:0009166,GO:0009987,GO:0016020,GO:…	3.1.3.5,3.6.1.45	ko:K01081,ko:K11751	ko00230,ko00240,ko00760,ko01100,ko01110,map00230,map00240,map00760,map01100,map01110	-	R00183,R00511,R00963,R01126,R01227,R01569,R01664,R01968,R02088,R02102,R02323,R02719,R03346	RC00017	ko00000,ko00001,ko01000	-	-	5_nucleotid_C,LysM,Metallophos
RA01000556.1	1038862.KB893917_gene4250	2.22e-231	635.0	COG0123@1|root,COG0123@2|Bacteria,1MU7P@1224|Proteobacteria,2TSX9@28211|Alphaproteobacteria,3JRBX@41294|Bradyrhizobiaceae	28211|Alphaproteobacteria	BQ	Histone deacetylase domain	MA20_07590	-	-	ko:K04768	-	-	-	-	ko00000	-	-	Hist_deacetyl
RA01000557.1	1038866.KB902824_gene1185	2.98e-49	157.0	COG1722@1|root,COG1722@2|Bacteria,1PTYQ@1224|Proteobacteria,2UFD6@28211|Alphaproteobacteria,3K0ER@41294|Bradyrhizobiaceae	28211|Alphaproteobacteria	L	Bidirectionally degrades single-stranded DNA into large acid-insoluble oligonucleotides, which are then degraded further into small acid-soluble oligonucleotides	xseB	-	3.1.11.6	ko:K03602	ko03430,map03430	-	-	-	ko00000,ko00001,ko01000,ko03400	-	-	Exonuc_VII_S
RA01000558.1	1038866.KB902824_gene1184	0.0	1256.0	COG1154@1|root,COG1154@2|Bacteria,1MUSJ@1224|Proteobacteria,2TRDD@28211|Alphaproteobacteria,3JSDV@41294|Bradyrhizobiaceae	28211|Alphaproteobacteria	H	Catalyzes the acyloin condensation reaction between C atoms 2 and 3 of pyruvate and glyceraldehyde 3-phosphate to yield 1-deoxy-D-xylulose-5-phosphate (DXP)	dxs	-	2.2.1.7	ko:K01662	ko00730,ko00900,ko01100,ko01110,ko01130,map00730,map00900,map01100,map01110,map01130	M00096	R05636	RC00032	ko00000,ko00001,ko00002,ko01000	-	-	DXP_synthase_N,Transket_pyr,Transketolase_C
RA01000559.1	443598.AUFA01000023_gene3341	4.41e-119	341.0	COG3613@1|root,COG3613@2|Bacteria,1N0AK@1224|Proteobacteria,2UCQW@28211|Alphaproteobacteria,3JW97@41294|Bradyrhizobiaceae	28211|Alphaproteobacteria	F	Nucleoside 2-deoxyribosyltransferase	-	-	-	-	-	-	-	-	-	-	-	Nuc_deoxyrib_tr
RA01000560.1	319003.Bra1253DRAFT_02758	6.23e-160	449.0	COG1189@1|root,COG1189@2|Bacteria,1MWP5@1224|Proteobacteria,2TRW9@28211|Alphaproteobacteria,3JQPM@41294|Bradyrhizobiaceae	28211|Alphaproteobacteria	J	FtsJ-like methyltransferase	tlyA	-	2.1.1.226,2.1.1.227	ko:K06442	-	-	-	-	ko00000,ko01000,ko03009	-	-	FtsJ,S4
RA01000561.1	224911.27350904	8.5e-285	780.0	COG2265@1|root,COG2265@2|Bacteria,1MV3A@1224|Proteobacteria,2TR40@28211|Alphaproteobacteria,3JT5J@41294|Bradyrhizobiaceae	28211|Alphaproteobacteria	J	Belongs to the class I-like SAM-binding methyltransferase superfamily. RNA M5U methyltransferase family	rumA	-	2.1.1.190,2.1.1.35	ko:K00557,ko:K03215	-	-	-	-	ko00000,ko01000,ko03009,ko03016	-	-	tRNA_U5-meth_tr
RA01000562.1	936455.KI421499_gene4660	6.08e-104	303.0	2BS9T@1|root,32MBF@2|Bacteria,1R7SY@1224|Proteobacteria,2U1SA@28211|Alphaproteobacteria,3JTIX@41294|Bradyrhizobiaceae	28211|Alphaproteobacteria	-	-	-	-	-	-	-	-	-	-	-	-	-	-
RA01000563.1	1038866.KB902824_gene1171	4.65e-73	220.0	COG0346@1|root,COG0346@2|Bacteria,1RJF4@1224|Proteobacteria,2U9AZ@28211|Alphaproteobacteria,3JZMM@41294|Bradyrhizobiaceae	28211|Alphaproteobacteria	E	Glyoxalase/Bleomycin resistance protein/Dioxygenase superfamily	-	-	-	-	-	-	-	-	-	-	-	Glyoxalase
RA01000564.1	1038867.AXAY01000001_gene6479	1.18e-171	482.0	COG1708@1|root,COG1708@2|Bacteria,1N1CX@1224|Proteobacteria,2TSWE@28211|Alphaproteobacteria,3JV1W@41294|Bradyrhizobiaceae	28211|Alphaproteobacteria	S	Nucleotidyltransferase domain	-	-	-	-	-	-	-	-	-	-	-	NTP_transf_2
RA01000565.1	443598.AUFA01000023_gene3334	3.27e-120	346.0	2A5M8@1|root,30UBU@2|Bacteria,1PZCG@1224|Proteobacteria,2TRIN@28211|Alphaproteobacteria,3JT7S@41294|Bradyrhizobiaceae	28211|Alphaproteobacteria	-	-	-	-	-	-	-	-	-	-	-	-	-	-
RA01000566.1	1038866.KB902824_gene1168	4.16e-200	555.0	COG2304@1|root,COG2304@2|Bacteria,1PH4N@1224|Proteobacteria,2TQTJ@28211|Alphaproteobacteria,3JSMW@41294|Bradyrhizobiaceae	28211|Alphaproteobacteria	S	Protein of unknown function (DUF1194)	MA20_07505	-	-	-	-	-	-	-	-	-	-	DUF1194
RA01000567.1	224911.27350896	4.55e-253	698.0	COG0477@1|root,COG0477@2|Bacteria,1QWSX@1224|Proteobacteria,2TX4I@28211|Alphaproteobacteria,3JQPJ@41294|Bradyrhizobiaceae	28211|Alphaproteobacteria	EGP	Sugar (and other) transporter	MA20_07500	-	-	-	-	-	-	-	-	-	-	MFS_1,Sugar_tr
RA01000568.1	936455.KI421499_gene4667	3.27e-83	246.0	COG0239@1|root,COG0239@2|Bacteria,1MZNH@1224|Proteobacteria,2UBUP@28211|Alphaproteobacteria,3JYP6@41294|Bradyrhizobiaceae	28211|Alphaproteobacteria	D	Important for reducing fluoride concentration in the cell, thus reducing its toxicity	crcB	GO:0003674,GO:0005215,GO:0005575,GO:0005623,GO:0005886,GO:0005887,GO:0006810,GO:0006811,GO:0006820,GO:0008150,GO:0008509,GO:0015075,GO:0015103,GO:0015318,GO:0015698,GO:0016020,GO:0016021,GO:0022857,GO:0031224,GO:0031226,GO:0034220,GO:0044425,GO:0044459,GO:0044464,GO:0051179,GO:0051234,GO:0055085,GO:0071944,GO:0098656,GO:0098660,GO:0098661,GO:1903424,GO:1903425	-	ko:K06199	-	-	-	-	ko00000,ko02000	1.A.43.1,1.A.43.2,1.A.43.3	-	CRCB
RA01000569.1	318996.AXAZ01000001_gene4563	1.06e-92	271.0	COG0239@1|root,COG0239@2|Bacteria,1N3EB@1224|Proteobacteria,2UB3U@28211|Alphaproteobacteria,3JY0C@41294|Bradyrhizobiaceae	28211|Alphaproteobacteria	D	Important for reducing fluoride concentration in the cell, thus reducing its toxicity	crcB1	GO:0003674,GO:0005215,GO:0005575,GO:0005623,GO:0005886,GO:0005887,GO:0006810,GO:0006811,GO:0006820,GO:0008150,GO:0008509,GO:0015075,GO:0015103,GO:0015318,GO:0015698,GO:0016020,GO:0016021,GO:0022857,GO:0031224,GO:0031226,GO:0034220,GO:0044425,GO:0044459,GO:0044464,GO:0051179,GO:0051234,GO:0055085,GO:0071944,GO:0098656,GO:0098660,GO:0098661,GO:1903424,GO:1903425	-	ko:K06199	-	-	-	-	ko00000,ko02000	1.A.43.1,1.A.43.2,1.A.43.3	-	CRCB,DUF190
RA01000570.1	1038866.KB902824_gene1164	1.86e-70	213.0	COG1993@1|root,COG1993@2|Bacteria,1N0EM@1224|Proteobacteria,2U9WX@28211|Alphaproteobacteria,3JYRP@41294|Bradyrhizobiaceae	28211|Alphaproteobacteria	S	Uncharacterized ACR, COG1993	-	-	-	ko:K09137	-	-	-	-	ko00000	-	-	DUF190
RA01000571.1	1038862.KB893917_gene4267	1.69e-65	199.0	COG2127@1|root,COG2127@2|Bacteria,1N0VF@1224|Proteobacteria,2UCNH@28211|Alphaproteobacteria,3JZDT@41294|Bradyrhizobiaceae	28211|Alphaproteobacteria	S	Involved in the modulation of the specificity of the ClpAP-mediated ATP-dependent protein degradation	clpS	-	-	ko:K06891	-	-	-	-	ko00000	-	-	ClpS
RA01000572.1	318996.AXAZ01000001_gene4560	1.68e-258	711.0	COG2114@1|root,COG2114@2|Bacteria,1MWHK@1224|Proteobacteria,2TR2J@28211|Alphaproteobacteria,3JQNR@41294|Bradyrhizobiaceae	28211|Alphaproteobacteria	T	Adenylyl- / guanylyl cyclase, catalytic domain	-	-	4.6.1.1	ko:K01768	ko00230,ko02025,ko04113,ko04213,map00230,map02025,map04113,map04213	M00695	R00089,R00434	RC00295	ko00000,ko00001,ko00002,ko01000	-	-	Guanylate_cyc
RA01000573.1	1037409.BJ6T_71710	3.45e-264	723.0	COG0082@1|root,COG0082@2|Bacteria,1MU98@1224|Proteobacteria,2TQY2@28211|Alphaproteobacteria,3JRF1@41294|Bradyrhizobiaceae	28211|Alphaproteobacteria	E	Catalyzes the anti-1,4-elimination of the C-3 phosphate and the C-6 proR hydrogen from 5-enolpyruvylshikimate-3-phosphate (EPSP) to yield chorismate, which is the branch point compound that serves as the starting substrate for the three terminal pathways of aromatic amino acid biosynthesis. This reaction introduces a second double bond into the aromatic ring system	aroC	GO:0000166,GO:0003674,GO:0003824,GO:0004107,GO:0005488,GO:0005575,GO:0005622,GO:0005623,GO:0005737,GO:0005829,GO:0006082,GO:0006520,GO:0006725,GO:0006807,GO:0008150,GO:0008152,GO:0008652,GO:0009058,GO:0009072,GO:0009073,GO:0009423,GO:0009987,GO:0010181,GO:0016053,GO:0016829,GO:0016835,GO:0016838,GO:0019438,GO:0019752,GO:0032553,GO:0036094,GO:0043167,GO:0043168,GO:0043436,GO:0043648,GO:0043650,GO:…	4.2.3.5	ko:K01736	ko00400,ko01100,ko01110,ko01130,ko01230,map00400,map01100,map01110,map01130,map01230	M00022	R01714	RC00586	ko00000,ko00001,ko00002,ko01000	-	-	Chorismate_synt
RA01000574.1	318996.AXAZ01000001_gene4558	9.13e-133	377.0	COG0406@1|root,COG0406@2|Bacteria,1NPC4@1224|Proteobacteria,2U9WD@28211|Alphaproteobacteria,3JRMW@41294|Bradyrhizobiaceae	28211|Alphaproteobacteria	G	Phosphoglycerate mutase family	gpmB	-	5.4.2.12	ko:K15634	ko00010,ko00260,ko00680,ko01100,ko01110,ko01120,ko01130,ko01200,ko01230,map00010,map00260,map00680,map01100,map01110,map01120,map01130,map01200,map01230	M00001,M00002,M00003	R01518	RC00536	ko00000,ko00001,ko00002,ko01000	-	-	His_Phos_1
RA01000575.1	1038862.KB893917_gene4273	3.56e-193	536.0	COG0623@1|root,COG0623@2|Bacteria,1MV05@1224|Proteobacteria,2TSU4@28211|Alphaproteobacteria,3JUUR@41294|Bradyrhizobiaceae	28211|Alphaproteobacteria	I	Enoyl- acyl-carrier-protein reductase NADH	fabI2	-	1.3.1.10,1.3.1.9	ko:K00208	ko00061,ko00333,ko00780,ko01100,ko01130,ko01212,map00061,map00333,map00780,map01100,map01130,map01212	M00083,M00572	R01404,R04429,R04430,R04724,R04725,R04955,R04956,R04958,R04959,R04961,R04962,R04966,R04967,R04969,R04970,R07765,R10118,R10122,R11671	RC00052,RC00076,RC00120	ko00000,ko00001,ko00002,ko01000,ko01004	-	-	adh_short_C2
RA01000576.1	224911.27350884	4.24e-104	301.0	COG1595@1|root,COG1595@2|Bacteria,1MZMC@1224|Proteobacteria,2TU76@28211|Alphaproteobacteria,3JTYJ@41294|Bradyrhizobiaceae	28211|Alphaproteobacteria	K	Belongs to the sigma-70 factor family. ECF subfamily	MA20_07455	-	-	ko:K03088	-	-	-	-	ko00000,ko03021	-	-	Sigma70_r2,Sigma70_r4_2
RA01000577.1	936455.KI421499_gene4680	5.36e-172	481.0	COG5662@1|root,COG5662@2|Bacteria,1RK1X@1224|Proteobacteria,2U8SM@28211|Alphaproteobacteria,3JTT0@41294|Bradyrhizobiaceae	28211|Alphaproteobacteria	K	transmembrane transcriptional regulator (Anti-sigma factor)	MA20_07450	-	-	-	-	-	-	-	-	-	-	zf-HC2
RA01000578.1	224911.27350882	1.17e-218	604.0	COG0484@1|root,COG0484@2|Bacteria,1MUZ4@1224|Proteobacteria,2TR01@28211|Alphaproteobacteria,3JQPS@41294|Bradyrhizobiaceae	28211|Alphaproteobacteria	O	DnaJ C terminal domain	dnaJ2	-	-	-	-	-	-	-	-	-	-	DnaJ,DnaJ_C
RA01000579.1	1038862.KB893917_gene4277	1.41e-89	263.0	COG4520@1|root,COG4520@2|Bacteria,1N1T9@1224|Proteobacteria,2UCN2@28211|Alphaproteobacteria,3JYD9@41294|Bradyrhizobiaceae	28211|Alphaproteobacteria	M	17 kDa outer membrane surface antigen	MA20_07440	-	-	-	-	-	-	-	-	-	-	17kDa_Anti_2
RA01000580.1	1038867.AXAY01000001_gene6496	5.3e-157	439.0	COG0259@1|root,COG0259@2|Bacteria,1NZUU@1224|Proteobacteria,2TT1U@28211|Alphaproteobacteria,3JS9R@41294|Bradyrhizobiaceae	28211|Alphaproteobacteria	H	Catalyzes the oxidation of either pyridoxine 5'- phosphate (PNP) or pyridoxamine 5'-phosphate (PMP) into pyridoxal 5'-phosphate (PLP)	pdxH	GO:0003674,GO:0003824,GO:0004733,GO:0006081,GO:0006725,GO:0006732,GO:0006766,GO:0006767,GO:0006793,GO:0006796,GO:0006807,GO:0008150,GO:0008152,GO:0009058,GO:0009108,GO:0009110,GO:0009987,GO:0016491,GO:0016638,GO:0016641,GO:0017144,GO:0018130,GO:0019438,GO:0019637,GO:0034641,GO:0042364,GO:0042816,GO:0042819,GO:0042822,GO:0042823,GO:0044237,GO:0044249,GO:0044271,GO:0044281,GO:0044283,GO:0046184,GO:…	1.4.3.5	ko:K00275	ko00750,ko01100,ko01120,map00750,map01100,map01120	M00124	R00277,R00278,R01710,R01711	RC00048,RC00116	ko00000,ko00001,ko00002,ko01000	-	-	PNP_phzG_C,Putative_PNPOx
RA01000581.1	443598.AUFA01000023_gene3317	1.34e-178	497.0	COG1028@1|root,COG1028@2|Bacteria,1MVT2@1224|Proteobacteria,2TQKU@28211|Alphaproteobacteria,3JS01@41294|Bradyrhizobiaceae	28211|Alphaproteobacteria	IQ	Enoyl-(Acyl carrier protein) reductase	fixR	-	1.1.1.100	ko:K00059	ko00061,ko00333,ko00780,ko01040,ko01100,ko01130,ko01212,map00061,map00333,map00780,map01040,map01100,map01130,map01212	M00083,M00572	R04533,R04534,R04536,R04543,R04566,R04953,R04964,R07759,R07763,R10116,R10120,R11671	RC00029,RC00117	ko00000,ko00001,ko00002,ko01000,ko01004	-	-	adh_short_C2
RA01000582.1	1037409.BJ6T_71800	1.49e-157	444.0	COG0500@1|root,COG0500@2|Bacteria,1RKZB@1224|Proteobacteria,2UAVQ@28211|Alphaproteobacteria,3JTA1@41294|Bradyrhizobiaceae	28211|Alphaproteobacteria	Q	Methyltransferase domain	-	-	-	-	-	-	-	-	-	-	-	Methyltransf_11,Methyltransf_25
RA01000583.1	319003.Bra1253DRAFT_02780	3.59e-38	128.0	2BSC4@1|root,317BA@2|Bacteria,1NJGY@1224|Proteobacteria,2UKQT@28211|Alphaproteobacteria,3K1U6@41294|Bradyrhizobiaceae	28211|Alphaproteobacteria	-	-	-	-	-	-	-	-	-	-	-	-	-	-
RA01000584.1	1038862.KB893917_gene4281	5.59e-224	618.0	COG0598@1|root,COG0598@2|Bacteria,1MWMP@1224|Proteobacteria,2TQQD@28211|Alphaproteobacteria,3JTS3@41294|Bradyrhizobiaceae	28211|Alphaproteobacteria	P	CorA-like Mg2+ transporter protein	corA	-	-	ko:K03284	-	-	-	-	ko00000,ko02000	1.A.35.1,1.A.35.3	-	CorA
RA01000585.1	224911.27350877	1.17e-158	446.0	COG1376@1|root,COG1376@2|Bacteria,1MVYT@1224|Proteobacteria,2U60K@28211|Alphaproteobacteria,3JRF0@41294|Bradyrhizobiaceae	28211|Alphaproteobacteria	S	L,D-transpeptidase catalytic domain	MA20_07410	-	-	-	-	-	-	-	-	-	-	YkuD
RA01000586.1	1037409.BJ6T_71830	3.77e-211	590.0	COG3921@1|root,COG3921@2|Bacteria,1PZMM@1224|Proteobacteria,2TR6H@28211|Alphaproteobacteria,3JV1V@41294|Bradyrhizobiaceae	28211|Alphaproteobacteria	S	Extensin-like protein C-terminus	-	-	-	-	-	-	-	-	-	-	-	Extensin-like_C
RA01000587.1	224911.27350875	0.0	1088.0	COG0318@1|root,COG0318@2|Bacteria,1MUMC@1224|Proteobacteria,2TR96@28211|Alphaproteobacteria,3JTQ8@41294|Bradyrhizobiaceae	28211|Alphaproteobacteria	IQ	AMP-binding enzyme C-terminal domain	alkK	-	6.2.1.44,6.2.1.48	ko:K00666,ko:K02182,ko:K20034	ko00920,map00920	-	R10820	RC00004,RC00014	ko00000,ko00001,ko01000,ko01004	-	-	AMP-binding,AMP-binding_C
RA01000588.1	936455.KI421499_gene4690	1.61e-273	749.0	COG2358@1|root,COG2358@2|Bacteria,1MWSG@1224|Proteobacteria,2TSVY@28211|Alphaproteobacteria,3JR78@41294|Bradyrhizobiaceae	28211|Alphaproteobacteria	S	NMT1-like family	-	-	-	ko:K07080	-	-	-	-	ko00000	-	-	NMT1_3
RA01000589.1	443598.AUFA01000023_gene3311	1.83e-205	575.0	COG0790@1|root,COG0790@2|Bacteria,1R5MB@1224|Proteobacteria,2TV77@28211|Alphaproteobacteria,3JXDS@41294|Bradyrhizobiaceae	28211|Alphaproteobacteria	S	COG0790 FOG TPR repeat, SEL1 subfamily	-	-	-	-	-	-	-	-	-	-	-	-
RA01000590.1	1037409.BJ6T_71850	6e-185	516.0	COG4446@1|root,COG4446@2|Bacteria,1N31A@1224|Proteobacteria,2U0NZ@28211|Alphaproteobacteria,3JU37@41294|Bradyrhizobiaceae	28211|Alphaproteobacteria	S	Protein of unknown function (DUF1499)	MA20_07395	-	-	-	-	-	-	-	-	-	-	DUF1499
RA01000591.1	224911.27350873	1.71e-220	608.0	COG0491@1|root,COG0491@2|Bacteria,1MVC3@1224|Proteobacteria,2TUAZ@28211|Alphaproteobacteria,3JRMU@41294|Bradyrhizobiaceae	28211|Alphaproteobacteria	S	Metallo-beta-lactamase superfamily	MA20_07390	-	3.1.2.6	ko:K01069	ko00620,map00620	-	R01736	RC00004,RC00137	ko00000,ko00001,ko01000	-	-	Lactamase_B
RA01000592.1	1304877.KI519399_gene3815	5.42e-296	807.0	COG1960@1|root,COG1960@2|Bacteria,1MUK0@1224|Proteobacteria,2TSAC@28211|Alphaproteobacteria,3JS55@41294|Bradyrhizobiaceae	28211|Alphaproteobacteria	I	Acyl-CoA dehydrogenase, middle domain	gcdH	-	1.3.8.6	ko:K00252	ko00071,ko00310,ko00362,ko00380,ko01100,ko01120,ko01130,map00071,map00310,map00362,map00380,map01100,map01120,map01130	M00032	R02487,R02488,R10074	RC00052,RC00156	ko00000,ko00001,ko00002,ko01000	-	-	Acyl-CoA_dh_1,Acyl-CoA_dh_M,Acyl-CoA_dh_N
RA01000593.1	1304878.AUGD01000007_gene5459	1.1e-258	709.0	COG0108@1|root,COG0807@1|root,COG0108@2|Bacteria,COG0807@2|Bacteria,1MU8P@1224|Proteobacteria,2TSMA@28211|Alphaproteobacteria,3JT2I@41294|Bradyrhizobiaceae	28211|Alphaproteobacteria	H	Catalyzes the conversion of D-ribulose 5-phosphate to formate and 3,4-dihydroxy-2-butanone 4-phosphate	ribB	-	3.5.4.25,4.1.99.12	ko:K14652	ko00740,ko00790,ko01100,ko01110,map00740,map00790,map01100,map01110	M00125,M00840	R00425,R07281	RC00293,RC01792,RC01815,RC02504	ko00000,ko00001,ko00002,ko01000	-	-	DHBP_synthase,GTP_cyclohydro2
RA01000594.1	1037409.BJ6T_71890	0.0	1038.0	COG0475@1|root,COG1226@1|root,COG0475@2|Bacteria,COG1226@2|Bacteria,1MV34@1224|Proteobacteria,2TRC5@28211|Alphaproteobacteria,3JTZ5@41294|Bradyrhizobiaceae	28211|Alphaproteobacteria	P	Belongs to the monovalent cation proton antiporter 2 (CPA2) transporter (TC 2.A.37) family	MA20_07375	-	-	-	-	-	-	-	-	-	-	Na_H_Exchanger,TrkA_N
RA01000595.1	1038862.KB893917_gene4290	4.1e-106	308.0	2D2K4@1|root,32XTX@2|Bacteria,1R38A@1224|Proteobacteria,2U62K@28211|Alphaproteobacteria,3JR4U@41294|Bradyrhizobiaceae	28211|Alphaproteobacteria	S	Protein of unknown function (DUF3124)	-	-	-	-	-	-	-	-	-	-	-	DUF3124
RA01000596.1	936455.KI421499_gene4698	2.18e-285	781.0	COG1167@1|root,COG1167@2|Bacteria,1MV6F@1224|Proteobacteria,2TR7I@28211|Alphaproteobacteria,3JRS7@41294|Bradyrhizobiaceae	28211|Alphaproteobacteria	EK	Alanine-glyoxylate amino-transferase	MA20_07365	-	-	ko:K00375,ko:K05825	ko00300,ko01100,ko01130,ko01210,map00300,map01100,map01130,map01210	-	R01939	RC00006	ko00000,ko00001,ko01000,ko03000	-	-	Aminotran_1_2,GntR
RA01000597.1	224911.27350867	5.58e-54	170.0	COG1396@1|root,COG1396@2|Bacteria,1N0JC@1224|Proteobacteria,2UC4Z@28211|Alphaproteobacteria,3K04C@41294|Bradyrhizobiaceae	28211|Alphaproteobacteria	K	Helix-turn-helix XRE-family like proteins	MA20_07360	-	-	-	-	-	-	-	-	-	-	HTH_31
RA01000598.1	1126627.BAWE01000004_gene2754	5.72e-94	275.0	2A6QX@1|root,30VJ0@2|Bacteria,1RA5F@1224|Proteobacteria,2U6RF@28211|Alphaproteobacteria,3JYBB@41294|Bradyrhizobiaceae	28211|Alphaproteobacteria	-	-	-	-	-	-	-	-	-	-	-	-	-	-
RA01000599.1	1038862.KB893917_gene4294	2.14e-39	131.0	2BU5C@1|root,32PE9@2|Bacteria,1N8TW@1224|Proteobacteria,2UHFD@28211|Alphaproteobacteria,3K15Y@41294|Bradyrhizobiaceae	28211|Alphaproteobacteria	-	-	-	-	-	-	-	-	-	-	-	-	-	-
RA01000600.1	318996.AXAZ01000001_gene4537	2.56e-182	508.0	COG0656@1|root,COG0656@2|Bacteria,1MWFS@1224|Proteobacteria,2TT2Q@28211|Alphaproteobacteria,3JUXB@41294|Bradyrhizobiaceae	28211|Alphaproteobacteria	S	Aldo/keto reductase family	dkgB	-	1.1.1.346	ko:K06222	-	-	-	-	ko00000,ko01000	-	-	Aldo_ket_red
RA01000601.1	1038866.KB902807_gene2702	0.0	1013.0	COG3540@1|root,COG3540@2|Bacteria,1MWAF@1224|Proteobacteria,2TS7J@28211|Alphaproteobacteria,3JRAS@41294|Bradyrhizobiaceae	28211|Alphaproteobacteria	P	PhoD-like phosphatase	phoD	-	3.1.3.1	ko:K01113	ko00790,ko01100,ko02020,map00790,map01100,map02020	M00126	R04620	RC00017	ko00000,ko00001,ko00002,ko01000	-	-	PhoD,PhoD_N
RA01000602.1	224911.27350863	5.04e-85	251.0	2BU3E@1|root,32PC7@2|Bacteria,1RFB0@1224|Proteobacteria,2U7C1@28211|Alphaproteobacteria,3JYSA@41294|Bradyrhizobiaceae	28211|Alphaproteobacteria	-	-	-	-	-	-	-	-	-	-	-	-	-	-
RA01000603.1	1304878.AUGD01000007_gene5449	1.06e-232	641.0	COG2070@1|root,COG2070@2|Bacteria,1MWPC@1224|Proteobacteria,2TQRT@28211|Alphaproteobacteria,3JQS9@41294|Bradyrhizobiaceae	28211|Alphaproteobacteria	S	Nitronate monooxygenase	MA20_07330	-	1.13.12.16	ko:K00459	ko00910,map00910	-	R00025	RC02541,RC02759	ko00000,ko00001,ko01000	-	-	NMO
RA01000604.1	1126627.BAWE01000004_gene2749	2.48e-171	478.0	COG1028@1|root,COG1028@2|Bacteria,1MWJQ@1224|Proteobacteria,2TVRP@28211|Alphaproteobacteria,3JSWP@41294|Bradyrhizobiaceae	28211|Alphaproteobacteria	IQ	short chain dehydrogenase	MA20_07325	-	-	-	-	-	-	-	-	-	-	adh_short
RA01000605.1	1038862.KB893917_gene4300	6.41e-111	318.0	COG1733@1|root,COG1733@2|Bacteria,1RF0R@1224|Proteobacteria,2U1VF@28211|Alphaproteobacteria,3JWK8@41294|Bradyrhizobiaceae	28211|Alphaproteobacteria	K	HxlR-like helix-turn-helix	MA20_07320	-	-	-	-	-	-	-	-	-	-	HxlR
RA01000606.1	1038866.KB902807_gene2705	0.0	1012.0	COG0477@1|root,COG0477@2|Bacteria,1RGPN@1224|Proteobacteria,2TQKW@28211|Alphaproteobacteria,3JU4Z@41294|Bradyrhizobiaceae	28211|Alphaproteobacteria	EGP	Sugar (and other) transporter	-	-	-	ko:K03446	-	M00701	-	-	ko00000,ko00002,ko02000	2.A.1.3	-	MFS_1
RA01000607.1	1038867.AXAY01000001_gene6520	2.87e-165	474.0	COG1566@1|root,COG1566@2|Bacteria,1MU7I@1224|Proteobacteria,2TS39@28211|Alphaproteobacteria,3JS4E@41294|Bradyrhizobiaceae	28211|Alphaproteobacteria	V	Biotin-lipoyl like	-	-	-	ko:K03543	-	M00701	-	-	ko00000,ko00002,ko02000	8.A.1.1	-	Biotin_lipoyl_2,HlyD_3,HlyD_D23
RA01000608.1	1038866.KB902807_gene2707	3.81e-27	99.0	2BI2W@1|root,32C7X@2|Bacteria,1N7EU@1224|Proteobacteria,2UFIP@28211|Alphaproteobacteria,3K121@41294|Bradyrhizobiaceae	28211|Alphaproteobacteria	-	-	-	-	-	-	-	-	-	-	-	-	-	-
RA01000609.1	1304877.KI519399_gene3797	8.39e-84	247.0	COG3861@1|root,COG3861@2|Bacteria,1MZM2@1224|Proteobacteria,2UBTQ@28211|Alphaproteobacteria,3JZPK@41294|Bradyrhizobiaceae	28211|Alphaproteobacteria	S	PRC-barrel domain	MA20_07315	-	-	-	-	-	-	-	-	-	-	PRC
RA01000610.1	1126627.BAWE01000004_gene2746	0.0	1127.0	COG0028@1|root,COG0028@2|Bacteria,1MWKP@1224|Proteobacteria,2TQK6@28211|Alphaproteobacteria,3JS18@41294|Bradyrhizobiaceae	28211|Alphaproteobacteria	EH	Thiamine pyrophosphate enzyme, central domain	-	-	1.2.3.3,1.2.5.1	ko:K00156,ko:K00158	ko00620,ko01100,map00620,map01100	-	R00207,R03145	RC00860,RC02745	ko00000,ko00001,ko01000	-	-	Rieske,TPP_enzyme_C,TPP_enzyme_M,TPP_enzyme_N
RA01000611.1	318996.AXAZ01000001_gene4526	7.84e-50	157.0	2AB64@1|root,310KC@2|Bacteria,1MZR8@1224|Proteobacteria,2UD21@28211|Alphaproteobacteria,3K0C1@41294|Bradyrhizobiaceae	28211|Alphaproteobacteria	-	-	-	-	-	-	-	-	-	-	-	-	-	-
RA01000612.1	936455.KI421499_gene4713	5.57e-117	336.0	COG3652@1|root,COG3652@2|Bacteria,1N6QU@1224|Proteobacteria,2UF70@28211|Alphaproteobacteria,3JRF3@41294|Bradyrhizobiaceae	28211|Alphaproteobacteria	S	Domain of unknown function (DUF4142)	-	-	-	ko:K08995	-	-	-	-	ko00000	-	-	DUF4142
RA01000613.1	319003.Bra1253DRAFT_02806	1.66e-198	551.0	COG1028@1|root,COG1028@2|Bacteria,1MW9A@1224|Proteobacteria,2TRDT@28211|Alphaproteobacteria,3JS08@41294|Bradyrhizobiaceae	28211|Alphaproteobacteria	IQ	Function proposed based on presence of conserved amino acid motif, structural feature or limited homology	-	-	-	-	-	-	-	-	-	-	-	adh_short_C2
RA01000614.1	1038866.KB902807_gene2713	1.11e-103	303.0	COG0671@1|root,COG0671@2|Bacteria,1R5MW@1224|Proteobacteria,2U4QJ@28211|Alphaproteobacteria,3JYMX@41294|Bradyrhizobiaceae	28211|Alphaproteobacteria	I	PAP2 superfamily	-	-	3.6.1.27	ko:K19302	ko00550,map00550	-	R05627	RC00002	ko00000,ko00001,ko01000,ko01011	-	-	PAP2
RA01000615.1	936455.KI421499_gene4716	9.12e-63	193.0	2EHGM@1|root,33B8H@2|Bacteria,1RJ48@1224|Proteobacteria,2UA29@28211|Alphaproteobacteria,3JZU3@41294|Bradyrhizobiaceae	28211|Alphaproteobacteria	S	Protein of unknown function (DUF3147)	-	-	-	-	-	-	-	-	-	-	-	DUF3147
RA01000616.1	1126627.BAWE01000004_gene2741	4.26e-74	226.0	2EM11@1|root,33EQJ@2|Bacteria,1RGA8@1224|Proteobacteria,2U6Z8@28211|Alphaproteobacteria,3JYWR@41294|Bradyrhizobiaceae	28211|Alphaproteobacteria	S	Protein of unknown function (DUF3147)	-	-	-	-	-	-	-	-	-	-	-	DUF3147
RA01000617.1	319003.Bra1253DRAFT_02810	3.43e-22	86.7	2BICD@1|root,32CIG@2|Bacteria,1NMAS@1224|Proteobacteria,2UMS4@28211|Alphaproteobacteria,3K1Z5@41294|Bradyrhizobiaceae	28211|Alphaproteobacteria	-	-	-	-	-	-	-	-	-	-	-	-	-	-
RA01000618.1	189753.AXAS01000020_gene1705	1.07e-39	132.0	2EIKT@1|root,33CC3@2|Bacteria,1N2RM@1224|Proteobacteria,2UD5M@28211|Alphaproteobacteria,3K02V@41294|Bradyrhizobiaceae	28211|Alphaproteobacteria	-	-	-	-	-	-	-	-	-	-	-	-	-	-
RA01000619.1	1038859.AXAU01000001_gene2781	1.54e-91	273.0	COG1917@1|root,COG1917@2|Bacteria,1P5AF@1224|Proteobacteria,2UWP1@28211|Alphaproteobacteria,3K5BD@41294|Bradyrhizobiaceae	28211|Alphaproteobacteria	S	Cupin	-	-	-	-	-	-	-	-	-	-	-	Cupin_2
RA01000620.1	1038867.AXAY01000003_gene3222	5.74e-211	591.0	COG1752@1|root,COG1752@2|Bacteria,1MVHW@1224|Proteobacteria,2TS4V@28211|Alphaproteobacteria,3JQYN@41294|Bradyrhizobiaceae	28211|Alphaproteobacteria	S	Patatin-like phospholipase	-	-	-	ko:K07001	-	-	-	-	ko00000	-	-	Patatin
RA01000621.1	224911.27353366	5.25e-127	362.0	COG0344@1|root,COG0344@2|Bacteria,1RD4Z@1224|Proteobacteria,2U7BZ@28211|Alphaproteobacteria,3JRDJ@41294|Bradyrhizobiaceae	28211|Alphaproteobacteria	I	Catalyzes the transfer of an acyl group from acyl- phosphate (acyl-PO(4)) to glycerol-3-phosphate (G3P) to form lysophosphatidic acid (LPA). This enzyme utilizes acyl-phosphate as fatty acyl donor, but not acyl-CoA or acyl-ACP	plsY	-	2.3.1.15	ko:K08591	ko00561,ko00564,ko01100,ko01110,map00561,map00564,map01100,map01110	M00089	R00851,R09380	RC00004,RC00039,RC00041	ko00000,ko00001,ko00002,ko01000,ko01004	-	-	G3P_acyltransf
RA01000622.1	318996.AXAZ01000019_gene1748	3.23e-306	835.0	COG0044@1|root,COG0044@2|Bacteria,1MVXY@1224|Proteobacteria,2TSTM@28211|Alphaproteobacteria,3JSMQ@41294|Bradyrhizobiaceae	28211|Alphaproteobacteria	F	Belongs to the metallo-dependent hydrolases superfamily. DHOase family. Class I DHOase subfamily	pyrC	-	3.5.2.3	ko:K01465	ko00240,ko01100,map00240,map01100	M00051	R01993	RC00632	ko00000,ko00001,ko00002,ko01000	-	-	Amidohydro_1
RA01000623.1	1304878.AUGD01000010_gene4463	1.08e-216	599.0	COG0540@1|root,COG0540@2|Bacteria,1MWAB@1224|Proteobacteria,2TRHP@28211|Alphaproteobacteria,3JR2V@41294|Bradyrhizobiaceae	28211|Alphaproteobacteria	F	Belongs to the ATCase OTCase family	pyrB	GO:0003674,GO:0003824,GO:0004070,GO:0005575,GO:0005622,GO:0005623,GO:0005737,GO:0006139,GO:0006220,GO:0006221,GO:0006725,GO:0006753,GO:0006793,GO:0006796,GO:0006807,GO:0008150,GO:0008152,GO:0009058,GO:0009117,GO:0009165,GO:0009218,GO:0009220,GO:0009259,GO:0009260,GO:0009987,GO:0016740,GO:0016741,GO:0016743,GO:0018130,GO:0019438,GO:0019637,GO:0019693,GO:0034641,GO:0034654,GO:0044237,GO:0044238,GO:…	2.1.3.2	ko:K00609	ko00240,ko00250,ko01100,map00240,map00250,map01100	M00051	R01397	RC00064,RC02850	ko00000,ko00001,ko00002,ko01000	-	-	OTCace,OTCace_N
RA01000624.1	224911.27353363	1.55e-162	459.0	COG2173@1|root,COG2173@2|Bacteria,1RENK@1224|Proteobacteria,2TRK8@28211|Alphaproteobacteria,3JQQR@41294|Bradyrhizobiaceae	28211|Alphaproteobacteria	M	Catalyzes hydrolysis of the D-alanyl-D-alanine dipeptide	ddpX	-	3.4.13.22	ko:K08641	ko01502,ko02020,map01502,map02020	M00651	-	-	ko00000,ko00001,ko00002,ko01000,ko01002,ko01011,ko01504	-	-	Peptidase_M15
RA01000625.1	318996.AXAZ01000019_gene1751	0.0	1040.0	COG1960@1|root,COG1960@2|Bacteria,1MU20@1224|Proteobacteria,2TQU2@28211|Alphaproteobacteria,3JST9@41294|Bradyrhizobiaceae	28211|Alphaproteobacteria	I	Acyl-CoA dehydrogenase, C-terminal domain	aidB	GO:0003674,GO:0003676,GO:0003677,GO:0003824,GO:0003995,GO:0005488,GO:0005515,GO:0006355,GO:0006950,GO:0006974,GO:0008150,GO:0008152,GO:0008470,GO:0009889,GO:0009890,GO:0009892,GO:0009987,GO:0010468,GO:0010556,GO:0010558,GO:0010605,GO:0010629,GO:0016491,GO:0016627,GO:0019219,GO:0019222,GO:0031323,GO:0031324,GO:0031326,GO:0031327,GO:0033554,GO:0042802,GO:0043565,GO:0045892,GO:0045934,GO:0048519,GO:…	-	ko:K09456	-	-	-	-	ko00000	-	-	Acyl-CoA_dh_1,Acyl-CoA_dh_M
RA01000626.1	1038866.KB902801_gene6886	7e-162	456.0	COG1266@1|root,COG1266@2|Bacteria,1QPQ0@1224|Proteobacteria,2TTX7@28211|Alphaproteobacteria,3JSCR@41294|Bradyrhizobiaceae	28211|Alphaproteobacteria	S	CAAX protease self-immunity	-	-	-	ko:K07052	-	-	-	-	ko00000	-	-	Abi
RA01000627.1	318996.AXAZ01000019_gene1753	3.06e-180	506.0	COG0679@1|root,COG0679@2|Bacteria,1N1X9@1224|Proteobacteria,2TV2I@28211|Alphaproteobacteria,3JR2H@41294|Bradyrhizobiaceae	28211|Alphaproteobacteria	S	Membrane transport protein	-	-	-	ko:K07088	-	-	-	-	ko00000	-	-	Mem_trans
RA01000628.1	443598.AUFA01000012_gene4956	6.49e-104	301.0	COG0816@1|root,COG0816@2|Bacteria,1RDHZ@1224|Proteobacteria,2U98Y@28211|Alphaproteobacteria,3JVCJ@41294|Bradyrhizobiaceae	28211|Alphaproteobacteria	J	Could be a nuclease involved in processing of the 5'-end of pre-16S rRNA	ruvX	GO:0000966,GO:0000967,GO:0005575,GO:0005622,GO:0005623,GO:0005737,GO:0005829,GO:0006139,GO:0006364,GO:0006396,GO:0006725,GO:0006807,GO:0008150,GO:0008152,GO:0009987,GO:0010467,GO:0016070,GO:0016072,GO:0022613,GO:0034470,GO:0034471,GO:0034641,GO:0034660,GO:0042254,GO:0043170,GO:0044085,GO:0044237,GO:0044238,GO:0044424,GO:0044444,GO:0044464,GO:0046483,GO:0071704,GO:0071840,GO:0090304,GO:1901360	-	ko:K07447	-	-	-	-	ko00000,ko01000	-	-	RuvX
RA01000629.1	1126627.BAWE01000005_gene4893	6.97e-42	137.0	2E48M@1|root,32Z4G@2|Bacteria,1N6NZ@1224|Proteobacteria,2UH8Q@28211|Alphaproteobacteria,3K0JE@41294|Bradyrhizobiaceae	28211|Alphaproteobacteria	-	-	MA20_36460	-	-	-	-	-	-	-	-	-	-	-
RA01000630.1	1304878.AUGD01000010_gene4471	0.0	1325.0	COG1864@1|root,COG3591@1|root,COG1864@2|Bacteria,COG3591@2|Bacteria,1QSGF@1224|Proteobacteria,2TTI7@28211|Alphaproteobacteria,3JQTM@41294|Bradyrhizobiaceae	28211|Alphaproteobacteria	EF	DNA/RNA non-specific endonuclease	-	-	-	ko:K01173	ko04210,map04210	-	-	-	ko00000,ko00001,ko03029	-	-	Endonuclease_NS,Trypsin_2
RA01000631.1	1038862.KB893841_gene81	1.91e-46	157.0	COG1878@1|root,COG1878@2|Bacteria,1MVWU@1224|Proteobacteria,2TUQ1@28211|Alphaproteobacteria,3JRVC@41294|Bradyrhizobiaceae	28211|Alphaproteobacteria	S	Putative cyclase	MA20_36465	-	-	-	-	-	-	-	-	-	-	Cyclase
RA01000632.1	936455.KI421499_gene2196	1.73e-192	536.0	COG0583@1|root,COG0583@2|Bacteria,1N8HZ@1224|Proteobacteria,2TV4S@28211|Alphaproteobacteria,3JRRM@41294|Bradyrhizobiaceae	28211|Alphaproteobacteria	K	Bacterial regulatory helix-turn-helix protein, lysR family	MA20_36470	-	-	-	-	-	-	-	-	-	-	HTH_1,LysR_substrate
RA01000633.1	1038867.AXAY01000003_gene3212	3.81e-203	566.0	COG2070@1|root,COG2070@2|Bacteria,1MWPC@1224|Proteobacteria,2TQRT@28211|Alphaproteobacteria,3JQWB@41294|Bradyrhizobiaceae	28211|Alphaproteobacteria	S	Nitronate monooxygenase	MA20_36475	-	1.13.12.16	ko:K00459	ko00910,map00910	-	R00025	RC02541,RC02759	ko00000,ko00001,ko01000	-	-	NMO
RA01000634.1	1304878.AUGD01000010_gene4475	8.02e-236	651.0	COG2070@1|root,COG2070@2|Bacteria,1MU2F@1224|Proteobacteria,2TUT7@28211|Alphaproteobacteria,3JRUT@41294|Bradyrhizobiaceae	28211|Alphaproteobacteria	S	Protein of unknown function (DUF561)	MA20_36480	-	1.13.12.16	ko:K00459	ko00910,map00910	-	R00025	RC02541,RC02759	ko00000,ko00001,ko01000	-	-	NMO
RA01000635.1	1038867.AXAY01000003_gene3210	3.39e-60	185.0	COG0721@1|root,COG0721@2|Bacteria,1MZQP@1224|Proteobacteria,2UBSZ@28211|Alphaproteobacteria,3JZDY@41294|Bradyrhizobiaceae	28211|Alphaproteobacteria	J	Allows the formation of correctly charged Asn-tRNA(Asn) or Gln-tRNA(Gln) through the transamidation of misacylated Asp- tRNA(Asn) or Glu-tRNA(Gln) in organisms which lack either or both of asparaginyl-tRNA or glutaminyl-tRNA synthetases. The reaction takes place in the presence of glutamine and ATP through an activated phospho-Asp-tRNA(Asn) or phospho-Glu-tRNA(Gln)	gatC	-	6.3.5.6,6.3.5.7	ko:K02435	ko00970,ko01100,map00970,map01100	-	R03905,R04212	RC00010	ko00000,ko00001,ko01000,ko03029	-	-	Glu-tRNAGln
RA01000636.1	1038862.KB893841_gene86	9.99e-44	142.0	2A97Q@1|root,30YCE@2|Bacteria,1N34M@1224|Proteobacteria,2UCVU@28211|Alphaproteobacteria,3K0FV@41294|Bradyrhizobiaceae	28211|Alphaproteobacteria	-	-	MA20_36490	-	-	-	-	-	-	-	-	-	-	-
RA01000637.1	1038867.AXAY01000003_gene3208	0.0	942.0	COG0154@1|root,COG0154@2|Bacteria,1MUVQ@1224|Proteobacteria,2TRFY@28211|Alphaproteobacteria,3JU77@41294|Bradyrhizobiaceae	28211|Alphaproteobacteria	J	Allows the formation of correctly charged Gln-tRNA(Gln) through the transamidation of misacylated Glu-tRNA(Gln) in organisms which lack glutaminyl-tRNA synthetase. The reaction takes place in the presence of glutamine and ATP through an activated gamma-phospho-Glu-tRNA(Gln)	gatA	-	6.3.5.6,6.3.5.7	ko:K02433	ko00970,ko01100,map00970,map01100	-	R03905,R04212	RC00010	ko00000,ko00001,ko01000,ko03029	-	-	Amidase
RA01000638.1	1038867.AXAY01000003_gene3207	8.37e-65	197.0	2C4KB@1|root,32YM4@2|Bacteria,1N74A@1224|Proteobacteria,2UHJ4@28211|Alphaproteobacteria,3JZRB@41294|Bradyrhizobiaceae	28211|Alphaproteobacteria	-	-	-	-	-	-	-	-	-	-	-	-	-	-
RA01000639.1	224911.27353352	0.0	928.0	COG0064@1|root,COG0064@2|Bacteria,1MUKG@1224|Proteobacteria,2TRHX@28211|Alphaproteobacteria,3JQRE@41294|Bradyrhizobiaceae	28211|Alphaproteobacteria	J	Allows the formation of correctly charged Asn-tRNA(Asn) or Gln-tRNA(Gln) through the transamidation of misacylated Asp- tRNA(Asn) or Glu-tRNA(Gln) in organisms which lack either or both of asparaginyl-tRNA or glutaminyl-tRNA synthetases. The reaction takes place in the presence of glutamine and ATP through an activated phospho-Asp-tRNA(Asn) or phospho-Glu-tRNA(Gln)	gatB	GO:0003674,GO:0003824,GO:0006082,GO:0006139,GO:0006399,GO:0006520,GO:0006725,GO:0006807,GO:0008150,GO:0008152,GO:0009987,GO:0016070,GO:0016874,GO:0016879,GO:0016884,GO:0019752,GO:0034641,GO:0034660,GO:0043038,GO:0043039,GO:0043170,GO:0043436,GO:0044237,GO:0044238,GO:0044281,GO:0046483,GO:0050567,GO:0070681,GO:0071704,GO:0090304,GO:0140098,GO:0140101,GO:1901360,GO:1901564	6.3.5.6,6.3.5.7	ko:K02434	ko00970,ko01100,map00970,map01100	-	R03905,R04212	RC00010	ko00000,ko00001,ko01000,ko03029	-	-	GatB_N,GatB_Yqey
RA01000641.1	1037409.BJ6T_46370	2.22e-55	172.0	COG0790@1|root,COG0790@2|Bacteria,1N8SR@1224|Proteobacteria,2UFFQ@28211|Alphaproteobacteria,3K0AK@41294|Bradyrhizobiaceae	28211|Alphaproteobacteria	S	COG0790 FOG TPR repeat, SEL1 subfamily	MA20_36515	-	-	ko:K07126	-	-	-	-	ko00000	-	-	Sel1
RA01000642.1	1126627.BAWE01000005_gene4882	0.0	926.0	COG0457@1|root,COG3914@1|root,COG0457@2|Bacteria,COG3914@2|Bacteria,1MVMG@1224|Proteobacteria,2TRVB@28211|Alphaproteobacteria,3JR8N@41294|Bradyrhizobiaceae	28211|Alphaproteobacteria	O	Function proposed based on presence of conserved amino acid motif, structural feature or limited homology	-	-	-	-	-	-	-	-	-	-	-	Glyco_transf_41,Methyltransf_23,TPR_1,TPR_11,TPR_16,TPR_2,TPR_8
RA01000644.1	1038862.KB893841_gene94	3.17e-155	484.0	COG0457@1|root,COG3914@1|root,COG0457@2|Bacteria,COG3914@2|Bacteria,1MVMG@1224|Proteobacteria,2TRVB@28211|Alphaproteobacteria,3JR8N@41294|Bradyrhizobiaceae	28211|Alphaproteobacteria	O	Function proposed based on presence of conserved amino acid motif, structural feature or limited homology	-	-	-	-	-	-	-	-	-	-	-	Glyco_transf_41,Methyltransf_23,TPR_1,TPR_11,TPR_16,TPR_2,TPR_8
RA01000645.1	1126627.BAWE01000005_gene4881	4.09e-305	839.0	COG3203@1|root,COG3203@2|Bacteria,1MXN6@1224|Proteobacteria,2TSH7@28211|Alphaproteobacteria,3JQSQ@41294|Bradyrhizobiaceae	28211|Alphaproteobacteria	M	Forms passive diffusion pores that allow small molecular weight hydrophilic materials across the outer membrane	ropAch1	-	-	-	-	-	-	-	-	-	-	Porin_2
RA01000646.1	114615.BRADO2084	9.02e-23	90.5	2AITW@1|root,3127C@2|Bacteria,1N345@1224|Proteobacteria,2UBTE@28211|Alphaproteobacteria,3K0UM@41294|Bradyrhizobiaceae	28211|Alphaproteobacteria	S	Protein of unknown function (DUF3551)	-	-	-	-	-	-	-	-	-	-	-	DUF3551
RA01000647.1	1037409.BJ6T_46400	0.0	1272.0	COG0741@1|root,COG0741@2|Bacteria,1MV3F@1224|Proteobacteria,2TRDB@28211|Alphaproteobacteria,3JT9G@41294|Bradyrhizobiaceae	28211|Alphaproteobacteria	M	Transglycosylase SLT domain	slt	-	-	ko:K08309	-	-	-	-	ko00000,ko01000,ko01011	-	GH23	SLT
RA01000648.1	1038862.KB893841_gene98	3.75e-212	586.0	COG0329@1|root,COG0329@2|Bacteria,1MUCM@1224|Proteobacteria,2TR5W@28211|Alphaproteobacteria,3JTVB@41294|Bradyrhizobiaceae	28211|Alphaproteobacteria	E	Catalyzes the condensation of (S)-aspartate-beta- semialdehyde (S)-ASA and pyruvate to 4-hydroxy- tetrahydrodipicolinate (HTPA)	dapA	GO:0003674,GO:0003824,GO:0006082,GO:0006090,GO:0008150,GO:0008152,GO:0008840,GO:0009987,GO:0016829,GO:0016835,GO:0016836,GO:0019752,GO:0032787,GO:0043436,GO:0044237,GO:0044281,GO:0071704	4.3.3.7	ko:K01714	ko00261,ko00300,ko01100,ko01110,ko01120,ko01130,ko01230,map00261,map00300,map01100,map01110,map01120,map01130,map01230	M00016,M00525,M00526,M00527	R10147	RC03062,RC03063	ko00000,ko00001,ko00002,ko01000	-	-	DHDPS
RA01000649.1	224911.27353336	1.03e-72	221.0	COG1970@1|root,COG1970@2|Bacteria,1RHG8@1224|Proteobacteria,2U99Y@28211|Alphaproteobacteria,3JY5H@41294|Bradyrhizobiaceae	28211|Alphaproteobacteria	M	Channel that opens in response to stretch forces in the membrane lipid bilayer. May participate in the regulation of osmotic pressure changes within the cell	mscL	GO:0003674,GO:0005215,GO:0005575,GO:0006810,GO:0006811,GO:0006884,GO:0008150,GO:0008361,GO:0008381,GO:0009987,GO:0009992,GO:0015267,GO:0016020,GO:0016021,GO:0016043,GO:0019725,GO:0022803,GO:0022836,GO:0022857,GO:0030104,GO:0031224,GO:0032535,GO:0042592,GO:0044425,GO:0048878,GO:0051179,GO:0051234,GO:0055082,GO:0055085,GO:0065007,GO:0065008,GO:0071840,GO:0090066	-	ko:K03282	-	-	-	-	ko00000,ko02000	1.A.22.1	-	MscL
RA01000650.1	1304878.AUGD01000010_gene4488	4.3e-106	306.0	COG0691@1|root,COG0691@2|Bacteria,1RDFP@1224|Proteobacteria,2U71I@28211|Alphaproteobacteria,3JSGD@41294|Bradyrhizobiaceae	28211|Alphaproteobacteria	O	Required for rescue of stalled ribosomes mediated by trans-translation. Binds to transfer-messenger RNA (tmRNA), required for stable association of tmRNA with ribosomes. tmRNA and SmpB together mimic tRNA shape, replacing the anticodon stem-loop with SmpB. tmRNA is encoded by the ssrA gene	smpB	-	-	ko:K03664	-	-	-	-	ko00000	-	-	SmpB
RA01000651.1	318996.AXAZ01000019_gene1773	5.32e-129	367.0	COG1225@1|root,COG1225@2|Bacteria,1MWJP@1224|Proteobacteria,2TSSW@28211|Alphaproteobacteria,3JTKD@41294|Bradyrhizobiaceae	28211|Alphaproteobacteria	O	Redoxin	MA20_36550	-	1.11.1.15	ko:K03386	ko04214,map04214	-	-	-	ko00000,ko00001,ko01000,ko04147	-	-	Redoxin
RA01000652.1	319003.Bra1253DRAFT_08222	6.12e-157	440.0	COG1573@1|root,COG1573@2|Bacteria,1MW91@1224|Proteobacteria,2TSUP@28211|Alphaproteobacteria,3JVJR@41294|Bradyrhizobiaceae	28211|Alphaproteobacteria	L	uracil-DNA glycosylase	ung	-	3.2.2.27	ko:K21929	ko03410,map03410	-	-	-	ko00000,ko00001,ko01000,ko03400	-	-	UDG
RA01000653.1	224911.27353332	2.06e-150	423.0	COG1432@1|root,COG1432@2|Bacteria,1MUAE@1224|Proteobacteria,2TU5M@28211|Alphaproteobacteria,3JRNT@41294|Bradyrhizobiaceae	28211|Alphaproteobacteria	L	NYN domain	MA20_36560	-	-	-	-	-	-	-	-	-	-	NYN
RA01000654.1	189753.AXAS01000012_gene4284	2.89e-82	244.0	COG1758@1|root,COG1758@2|Bacteria,1N6TX@1224|Proteobacteria,2U9BQ@28211|Alphaproteobacteria,3JY0E@41294|Bradyrhizobiaceae	28211|Alphaproteobacteria	K	Promotes RNA polymerase assembly. Latches the N- and C- terminal regions of the beta' subunit thereby facilitating its interaction with the beta and alpha subunits	rpoZ	-	2.7.7.6	ko:K03060	ko00230,ko00240,ko01100,ko03020,map00230,map00240,map01100,map03020	M00183	R00435,R00441,R00442,R00443	RC02795	br01611,ko00000,ko00001,ko00002,ko01000,ko03021,ko03400	-	-	RNA_pol_Rpb6
RA01000655.1	1304878.AUGD01000010_gene4493	0.0	1444.0	COG0317@1|root,COG0317@2|Bacteria,1MU44@1224|Proteobacteria,2TQNY@28211|Alphaproteobacteria,3JRT7@41294|Bradyrhizobiaceae	28211|Alphaproteobacteria	KT	In eubacteria ppGpp (guanosine 3'-diphosphate 5-' diphosphate) is a mediator of the stringent response that coordinates a variety of cellular activities in response to changes in nutritional abundance	spoT	-	2.7.6.5,3.1.7.2	ko:K00951,ko:K01139	ko00230,map00230	-	R00336,R00429	RC00002,RC00078	ko00000,ko00001,ko01000,ko03009	-	-	ACT_4,HD_4,RelA_SpoT,TGS
RA01000656.1	318996.AXAZ01000019_gene1778	2.46e-169	474.0	COG0854@1|root,COG0854@2|Bacteria,1MU9W@1224|Proteobacteria,2TTTF@28211|Alphaproteobacteria,3JSGR@41294|Bradyrhizobiaceae	28211|Alphaproteobacteria	H	Catalyzes the complicated ring closure reaction between the two acyclic compounds 1-deoxy-D-xylulose-5-phosphate (DXP) and 3-amino-2-oxopropyl phosphate (1-amino-acetone-3-phosphate or AAP) to form pyridoxine 5'-phosphate (PNP) and inorganic phosphate	pdxJ	GO:0003674,GO:0003824,GO:0005575,GO:0005622,GO:0005623,GO:0005737,GO:0005829,GO:0006725,GO:0006766,GO:0006767,GO:0006807,GO:0008150,GO:0008152,GO:0008614,GO:0008615,GO:0009058,GO:0009110,GO:0009987,GO:0016740,GO:0016769,GO:0017144,GO:0018130,GO:0019438,GO:0033856,GO:0034641,GO:0042364,GO:0042816,GO:0042819,GO:0044237,GO:0044249,GO:0044271,GO:0044281,GO:0044283,GO:0044424,GO:0044444,GO:0044464,GO:…	2.6.99.2	ko:K03474	ko00750,ko01100,map00750,map01100	M00124	R05838	RC01476	ko00000,ko00001,ko00002,ko01000	-	-	PdxJ
RA01000657.1	1037409.BJ6T_46500	7.76e-89	261.0	COG0736@1|root,COG0736@2|Bacteria,1MZBF@1224|Proteobacteria,2U77S@28211|Alphaproteobacteria,3JY1K@41294|Bradyrhizobiaceae	28211|Alphaproteobacteria	I	Transfers the 4'-phosphopantetheine moiety from coenzyme A to a Ser of acyl-carrier-protein	acpS	-	2.7.8.7	ko:K00997	ko00770,map00770	-	R01625	RC00002	ko00000,ko00001,ko01000	-	-	ACPS
RA01000658.1	1037409.BJ6T_46510	3.06e-190	527.0	COG0681@1|root,COG0681@2|Bacteria,1MXUF@1224|Proteobacteria,2TR9N@28211|Alphaproteobacteria,3JUV2@41294|Bradyrhizobiaceae	28211|Alphaproteobacteria	U	Belongs to the peptidase S26 family	lepB	-	3.4.21.89	ko:K03100	ko02024,ko03060,map02024,map03060	-	-	-	ko00000,ko00001,ko01000,ko01002	-	-	Peptidase_S24,Peptidase_S26
RA01000659.1	224911.27353326	5.36e-179	500.0	COG0571@1|root,COG0571@2|Bacteria,1MUQ6@1224|Proteobacteria,2TTIA@28211|Alphaproteobacteria,3JTYS@41294|Bradyrhizobiaceae	28211|Alphaproteobacteria	J	Digests double-stranded RNA. Involved in the processing of primary rRNA transcript to yield the immediate precursors to the large and small rRNAs (23S and 16S). Processes some mRNAs, and tRNAs when they are encoded in the rRNA operon. Processes pre- crRNA and tracrRNA of type II CRISPR loci if present in the organism	rnc	GO:0003674,GO:0003676,GO:0003723,GO:0003725,GO:0003824,GO:0004518,GO:0004519,GO:0004521,GO:0004525,GO:0004540,GO:0005488,GO:0006139,GO:0006396,GO:0006725,GO:0006807,GO:0008150,GO:0008152,GO:0009987,GO:0010467,GO:0016070,GO:0016787,GO:0016788,GO:0016891,GO:0016893,GO:0032296,GO:0034641,GO:0043170,GO:0044237,GO:0044238,GO:0046483,GO:0071704,GO:0090304,GO:0090305,GO:0090501,GO:0090502,GO:0097159,GO:…	3.1.26.3	ko:K03685	ko03008,ko05205,map03008,map05205	-	-	-	ko00000,ko00001,ko01000,ko03009,ko03019,ko03036	-	-	Ribonucleas_3_3,dsrm
RA01000660.1	1038862.KB893841_gene110	2.15e-208	577.0	COG1159@1|root,COG1159@2|Bacteria,1MUKT@1224|Proteobacteria,2TSHM@28211|Alphaproteobacteria,3JUHR@41294|Bradyrhizobiaceae	28211|Alphaproteobacteria	S	An essential GTPase that binds both GDP and GTP, with rapid nucleotide exchange. Plays a role in 16S rRNA processing and 30S ribosomal subunit biogenesis and possibly also in cell cycle regulation and energy metabolism	era	-	-	ko:K03595	-	-	-	-	ko00000,ko03009,ko03029	-	-	KH_2,MMR_HSR1
RA01000661.1	224911.27353324	1.2e-79	237.0	2A7JF@1|root,30WH8@2|Bacteria,1RE2C@1224|Proteobacteria,2UG2A@28211|Alphaproteobacteria,3K1CS@41294|Bradyrhizobiaceae	28211|Alphaproteobacteria	-	-	MA20_36600	-	-	-	-	-	-	-	-	-	-	-
RA01000662.1	936455.KI421499_gene2226	1.44e-177	494.0	COG1381@1|root,COG1381@2|Bacteria,1MVEJ@1224|Proteobacteria,2TTYW@28211|Alphaproteobacteria,3JVK5@41294|Bradyrhizobiaceae	28211|Alphaproteobacteria	L	Involved in DNA repair and RecF pathway recombination	recO	-	-	ko:K03584	ko03440,map03440	-	-	-	ko00000,ko00001,ko03400	-	-	RecO_C,RecO_N
RA01000663.1	318996.AXAZ01000019_gene1785	4.3e-54	170.0	2BWZU@1|root,3003B@2|Bacteria,1N2QB@1224|Proteobacteria,2UCVW@28211|Alphaproteobacteria,3K033@41294|Bradyrhizobiaceae	28211|Alphaproteobacteria	-	-	-	-	-	-	-	-	-	-	-	-	-	-
RA01000664.1	936455.KI421499_gene2228	0.0	1476.0	COG0188@1|root,COG0188@2|Bacteria,1MURI@1224|Proteobacteria,2TQRQ@28211|Alphaproteobacteria,3JWK5@41294|Bradyrhizobiaceae	28211|Alphaproteobacteria	L	Topoisomerase IV is essential for chromosome segregation. It relaxes supercoiled DNA. Performs the decatenation events required during the replication of a circular DNA molecule	parC	-	-	ko:K02621	-	-	-	-	ko00000,ko01000,ko02048,ko03032,ko03036	-	-	DNA_gyraseA_C,DNA_topoisoIV
RA01000665.1	1037409.BJ6T_46590	0.0	1012.0	COG2303@1|root,COG2303@2|Bacteria,1N0NP@1224|Proteobacteria,2TQSK@28211|Alphaproteobacteria,3JVQR@41294|Bradyrhizobiaceae	28211|Alphaproteobacteria	E	GMC oxidoreductase	MA20_36625	-	1.1.99.1	ko:K00108	ko00260,ko01100,map00260,map01100	M00555	R01025	RC00087	ko00000,ko00001,ko00002,ko01000	-	-	GMC_oxred_C,GMC_oxred_N
RA01000666.1	1245469.S58_70930	6.97e-80	241.0	COG1670@1|root,COG1670@2|Bacteria,1RECG@1224|Proteobacteria,2U7P3@28211|Alphaproteobacteria,3JUKY@41294|Bradyrhizobiaceae	28211|Alphaproteobacteria	J	Acetyltransferase (GNAT) domain	-	-	-	-	-	-	-	-	-	-	-	Acetyltransf_1,Acetyltransf_3
RA01000667.1	224911.27353317	1.16e-303	831.0	COG2059@1|root,COG2059@2|Bacteria,1MUBW@1224|Proteobacteria,2TRXF@28211|Alphaproteobacteria,3JSVF@41294|Bradyrhizobiaceae	28211|Alphaproteobacteria	P	TIGRFAM chromate transporter, chromate ion transporter (CHR) family	MA20_36630	-	-	ko:K07240	-	-	-	-	ko00000,ko02000	2.A.51.1	-	Chromate_transp
RA01000668.1	1304878.AUGD01000010_gene4508	4.3e-190	528.0	COG0607@1|root,COG4275@1|root,COG0607@2|Bacteria,COG4275@2|Bacteria,1MYDE@1224|Proteobacteria,2TRC3@28211|Alphaproteobacteria,3JRCM@41294|Bradyrhizobiaceae	28211|Alphaproteobacteria	P	Chromate resistance exported protein	chrB	-	-	-	-	-	-	-	-	-	-	Chrome_Resist,Rhodanese
RA01000669.1	1038862.KB893841_gene131	1.74e-192	538.0	COG1230@1|root,COG1230@2|Bacteria,1MVQB@1224|Proteobacteria,2TSE3@28211|Alphaproteobacteria,3JS0H@41294|Bradyrhizobiaceae	28211|Alphaproteobacteria	P	Cation efflux family	-	-	-	-	-	-	-	-	-	-	-	Cation_efflux
RA01000670.1	1038866.KB902791_gene3199	5.24e-193	536.0	COG0491@1|root,COG0491@2|Bacteria,1PHBX@1224|Proteobacteria,2TVDN@28211|Alphaproteobacteria,3JS6E@41294|Bradyrhizobiaceae	28211|Alphaproteobacteria	S	Metallo-beta-lactamase superfamily	-	-	-	-	-	-	-	-	-	-	-	Lactamase_B
RA01000671.1	1038866.KB902791_gene3200	3.09e-35	120.0	2AEZR@1|root,314XU@2|Bacteria,1NBYQ@1224|Proteobacteria,2UG51@28211|Alphaproteobacteria,3K16K@41294|Bradyrhizobiaceae	28211|Alphaproteobacteria	-	-	-	-	-	-	-	-	-	-	-	-	-	-
RA01000672.1	318996.AXAZ01000019_gene1798	4.81e-263	725.0	COG2223@1|root,COG2223@2|Bacteria,1QW6R@1224|Proteobacteria,2TWQ6@28211|Alphaproteobacteria,3K6KW@41294|Bradyrhizobiaceae	28211|Alphaproteobacteria	P	Major Facilitator Superfamily	MA20_36660	-	-	-	-	-	-	-	-	-	-	MFS_1
RA01000673.1	319003.Bra1253DRAFT_08244	5.62e-292	798.0	COG2114@1|root,COG2114@2|Bacteria,1QTFI@1224|Proteobacteria,2TRNP@28211|Alphaproteobacteria,3JSE5@41294|Bradyrhizobiaceae	28211|Alphaproteobacteria	T	Adenylyl- / guanylyl cyclase, catalytic domain	MA20_36665	-	4.6.1.1	ko:K01768	ko00230,ko02025,ko04113,ko04213,map00230,map02025,map04113,map04213	M00695	R00089,R00434	RC00295	ko00000,ko00001,ko00002,ko01000	-	-	Guanylate_cyc
RA01000674.1	318996.AXAZ01000019_gene1800	6.01e-260	717.0	COG0477@1|root,COG2814@2|Bacteria,1R3YS@1224|Proteobacteria,2TT98@28211|Alphaproteobacteria,3JRGC@41294|Bradyrhizobiaceae	28211|Alphaproteobacteria	EGP	Transmembrane secretion effector	MA20_36670	-	-	-	-	-	-	-	-	-	-	MFS_1,MFS_3
RA01000675.1	1038862.KB893841_gene141	2.19e-291	799.0	COG1914@1|root,COG1914@2|Bacteria,1MW6X@1224|Proteobacteria,2TUTC@28211|Alphaproteobacteria,3JQY1@41294|Bradyrhizobiaceae	28211|Alphaproteobacteria	P	H( )-stimulated, divalent metal cation uptake system	mntH	GO:0008150,GO:0009987,GO:0010035,GO:0010038,GO:0010039,GO:0042221,GO:0050896,GO:0051716,GO:0070887,GO:0071241,GO:0071248,GO:0071281	-	ko:K03322	-	-	-	-	ko00000,ko02000	2.A.55.2.6,2.A.55.3	-	Nramp
RA01000676.1	1380391.JIAS01000014_gene2285	2.29e-45	149.0	2EEYW@1|root,338S4@2|Bacteria,1NCZP@1224|Proteobacteria,2UCNN@28211|Alphaproteobacteria	28211|Alphaproteobacteria	-	-	-	-	-	-	-	-	-	-	-	-	-	-
RA01000677.1	1038862.KB893841_gene142	1.4e-188	523.0	COG2935@1|root,COG2935@2|Bacteria,1MW62@1224|Proteobacteria,2TQY8@28211|Alphaproteobacteria,3JUT3@41294|Bradyrhizobiaceae	28211|Alphaproteobacteria	O	May conjugate Arg from its aminoacyl-tRNA to the N- termini of proteins containing an N-terminal aspartate or glutamate	ate	GO:0003674,GO:0003824,GO:0004057,GO:0005575,GO:0005622,GO:0005623,GO:0005737,GO:0006464,GO:0006508,GO:0006511,GO:0006807,GO:0008150,GO:0008152,GO:0009056,GO:0009057,GO:0009987,GO:0016598,GO:0016740,GO:0016746,GO:0016755,GO:0019538,GO:0019941,GO:0030163,GO:0036211,GO:0043170,GO:0043412,GO:0043632,GO:0044237,GO:0044238,GO:0044248,GO:0044257,GO:0044260,GO:0044265,GO:0044267,GO:0044424,GO:0044464,GO:…	2.3.2.29	ko:K21420	-	-	R11547,R11548	RC00064	ko00000,ko01000	-	-	ATE_C,ATE_N
RA01000678.1	1304877.KI519399_gene4825	2.9e-122	349.0	COG1714@1|root,COG1714@2|Bacteria,1P9TI@1224|Proteobacteria,2TRIS@28211|Alphaproteobacteria,3JQUB@41294|Bradyrhizobiaceae	28211|Alphaproteobacteria	S	RDD family	MA20_36685	-	-	-	-	-	-	-	-	-	-	RDD
RA01000679.1	319003.Bra1253DRAFT_08249	3.49e-248	682.0	COG0113@1|root,COG0113@2|Bacteria,1MWMW@1224|Proteobacteria,2TS3F@28211|Alphaproteobacteria,3JRDV@41294|Bradyrhizobiaceae	28211|Alphaproteobacteria	H	Belongs to the ALAD family	hemB	GO:0003674,GO:0003824,GO:0004655,GO:0005488,GO:0005575,GO:0005622,GO:0005623,GO:0005737,GO:0005829,GO:0006725,GO:0006778,GO:0006779,GO:0006783,GO:0006807,GO:0008150,GO:0008152,GO:0008270,GO:0009058,GO:0009987,GO:0016829,GO:0016835,GO:0016836,GO:0018130,GO:0019438,GO:0033013,GO:0033014,GO:0034641,GO:0042168,GO:0042440,GO:0043167,GO:0043169,GO:0044237,GO:0044249,GO:0044271,GO:0044424,GO:0044444,GO:…	4.2.1.24	ko:K01698	ko00860,ko01100,ko01110,ko01120,map00860,map01100,map01110,map01120	M00121	R00036	RC00918,RC01781	ko00000,ko00001,ko00002,ko01000,ko04147	-	-	ALAD
RA01000680.1	1038866.KB902791_gene3212	8.07e-91	266.0	2D2F3@1|root,32TCM@2|Bacteria,1NECH@1224|Proteobacteria,2U5FZ@28211|Alphaproteobacteria,3JYBV@41294|Bradyrhizobiaceae	28211|Alphaproteobacteria	-	-	MA20_36695	-	-	-	-	-	-	-	-	-	-	-
RA01000681.1	1038862.KB893841_gene146	3.3e-115	330.0	COG1846@1|root,COG1846@2|Bacteria,1RA1V@1224|Proteobacteria,2U5W6@28211|Alphaproteobacteria,3JS7Z@41294|Bradyrhizobiaceae	28211|Alphaproteobacteria	K	Winged helix DNA-binding domain	mucS	-	-	-	-	-	-	-	-	-	-	HTH_27
RA01000682.1	1304878.AUGD01000010_gene4522	6.35e-46	148.0	2BJ87@1|root,32DHQ@2|Bacteria,1N0FC@1224|Proteobacteria,2UDW8@28211|Alphaproteobacteria,3K05M@41294|Bradyrhizobiaceae	28211|Alphaproteobacteria	-	-	-	-	-	-	-	-	-	-	-	-	-	-
RA01000683.1	1037409.BJ6T_46760	1.5e-44	144.0	2C6FU@1|root,2ZZG4@2|Bacteria,1N084@1224|Proteobacteria,2UCQM@28211|Alphaproteobacteria,3K05W@41294|Bradyrhizobiaceae	28211|Alphaproteobacteria	-	-	MA20_36710	-	-	-	-	-	-	-	-	-	-	-
RA01000684.1	224911.27353298	7.98e-310	844.0	COG0112@1|root,COG0112@2|Bacteria,1MUIS@1224|Proteobacteria,2TQKT@28211|Alphaproteobacteria,3JTRF@41294|Bradyrhizobiaceae	28211|Alphaproteobacteria	E	Catalyzes the reversible interconversion of serine and glycine with tetrahydrofolate (THF) serving as the one-carbon carrier. This reaction serves as the major source of one-carbon groups required for the biosynthesis of purines, thymidylate, methionine, and other important biomolecules. Also exhibits THF- independent aldolase activity toward beta-hydroxyamino acids, producing glycine and aldehyd…	glyA	-	2.1.2.1	ko:K00600	ko00260,ko00460,ko00630,ko00670,ko00680,ko01100,ko01110,ko01120,ko01130,ko01200,ko01230,ko01523,map00260,map00460,map00630,map00670,map00680,map01100,map01110,map01120,map01130,map01200,map01230,map01523	M00140,M00141,M00346,M00532	R00945,R09099	RC00022,RC00112,RC01583,RC02958	ko00000,ko00001,ko00002,ko01000	-	-	SHMT
RA01000685.1	1037409.BJ6T_46780	1.04e-103	300.0	COG1327@1|root,COG1327@2|Bacteria,1RE7V@1224|Proteobacteria,2U75W@28211|Alphaproteobacteria,3JVH1@41294|Bradyrhizobiaceae	28211|Alphaproteobacteria	K	Negatively regulates transcription of bacterial ribonucleotide reductase nrd genes and operons by binding to NrdR- boxes	nrdR	-	-	ko:K07738	-	-	-	-	ko00000,ko03000	-	-	ATP-cone
RA01000686.1	318996.AXAZ01000019_gene1812	2.67e-253	697.0	COG0117@1|root,COG1985@1|root,COG0117@2|Bacteria,COG1985@2|Bacteria,1MUWT@1224|Proteobacteria,2TR70@28211|Alphaproteobacteria,3JR4M@41294|Bradyrhizobiaceae	28211|Alphaproteobacteria	H	Converts 2,5-diamino-6-(ribosylamino)-4(3h)-pyrimidinone 5'-phosphate into 5-amino-6-(ribosylamino)-2,4(1h,3h)- pyrimidinedione 5'-phosphate	ribD	-	1.1.1.193,3.5.4.26	ko:K11752	ko00740,ko01100,ko01110,ko02024,map00740,map01100,map01110,map02024	M00125	R03458,R03459	RC00204,RC00933	ko00000,ko00001,ko00002,ko01000	-	-	RibD_C,dCMP_cyt_deam_1
RA01000687.1	1037409.BJ6T_46800	2.05e-133	379.0	COG0307@1|root,COG0307@2|Bacteria,1MUMB@1224|Proteobacteria,2U3RS@28211|Alphaproteobacteria,3JSAI@41294|Bradyrhizobiaceae	28211|Alphaproteobacteria	H	Lumazine binding domain	ribE	GO:0003674,GO:0003824,GO:0004746,GO:0005575,GO:0005622,GO:0005623,GO:0005737,GO:0005829,GO:0006766,GO:0006767,GO:0006771,GO:0006807,GO:0008150,GO:0008152,GO:0009058,GO:0009110,GO:0009231,GO:0009987,GO:0016740,GO:0016765,GO:0017144,GO:0018130,GO:0034641,GO:0042364,GO:0042726,GO:0042727,GO:0044237,GO:0044249,GO:0044271,GO:0044281,GO:0044283,GO:0044424,GO:0044444,GO:0044464,GO:0046483,GO:0071704,GO:…	2.5.1.9	ko:K00793	ko00740,ko01100,ko01110,map00740,map01100,map01110	M00125	R00066	RC00958,RC00960	ko00000,ko00001,ko00002,ko01000	-	-	Lum_binding
RA01000688.1	224911.27353294	7.27e-101	293.0	COG0054@1|root,COG0054@2|Bacteria,1RD9J@1224|Proteobacteria,2U9IZ@28211|Alphaproteobacteria,3JSGU@41294|Bradyrhizobiaceae	28211|Alphaproteobacteria	H	Catalyzes the formation of 6,7-dimethyl-8- ribityllumazine by condensation of 5-amino-6-(D- ribitylamino)uracil with 3,4-dihydroxy-2-butanone 4-phosphate. This is the penultimate step in the biosynthesis of riboflavin	ribH	GO:0000906,GO:0003674,GO:0003824,GO:0005575,GO:0005622,GO:0005623,GO:0005737,GO:0005829,GO:0006766,GO:0006767,GO:0006771,GO:0006807,GO:0008150,GO:0008152,GO:0009058,GO:0009110,GO:0009231,GO:0009987,GO:0016740,GO:0016765,GO:0017144,GO:0018130,GO:0034641,GO:0042364,GO:0042726,GO:0042727,GO:0044237,GO:0044249,GO:0044271,GO:0044281,GO:0044283,GO:0044424,GO:0044444,GO:0044464,GO:0046483,GO:0071704,GO:…	2.5.1.78	ko:K00794	ko00740,ko01100,ko01110,map00740,map01100,map01110	M00125	R04457	RC00960	ko00000,ko00001,ko00002,ko01000	-	-	DMRL_synthase
RA01000689.1	318996.AXAZ01000019_gene1815	6e-110	317.0	COG0781@1|root,COG0781@2|Bacteria,1RHFZ@1224|Proteobacteria,2UBQA@28211|Alphaproteobacteria,3JWKB@41294|Bradyrhizobiaceae	28211|Alphaproteobacteria	K	Involved in transcription antitermination. Required for transcription of ribosomal RNA (rRNA) genes. Binds specifically to the boxA antiterminator sequence of the ribosomal RNA (rrn) operons	nusB	-	-	ko:K03625	-	-	-	-	ko00000,ko03009,ko03021	-	-	NusB
RA01000690.1	1037409.BJ6T_46830	8.79e-204	568.0	COG0611@1|root,COG0611@2|Bacteria,1MU9X@1224|Proteobacteria,2TTI6@28211|Alphaproteobacteria,3JQYI@41294|Bradyrhizobiaceae	28211|Alphaproteobacteria	H	Catalyzes the ATP-dependent phosphorylation of thiamine- monophosphate (TMP) to form thiamine-pyrophosphate (TPP), the active form of vitamin B1	thiL	-	2.7.4.16	ko:K00946	ko00730,ko01100,map00730,map01100	M00127	R00617	RC00002	ko00000,ko00001,ko00002,ko01000	-	-	AIRS,AIRS_C
RA01000691.1	335659.S23_31830	4.8e-125	358.0	COG0727@1|root,COG0727@2|Bacteria,1RJ0V@1224|Proteobacteria,2U8AG@28211|Alphaproteobacteria,3JYN2@41294|Bradyrhizobiaceae	28211|Alphaproteobacteria	S	PFAM Uncharacterised protein family (UPF0153)	-	-	-	-	-	-	-	-	-	-	-	-
RA01000692.1	224911.27353291	0.0	1200.0	COG3808@1|root,COG3808@2|Bacteria,1MUQ3@1224|Proteobacteria,2TR9G@28211|Alphaproteobacteria,3JUCV@41294|Bradyrhizobiaceae	28211|Alphaproteobacteria	C	Proton pump that utilizes the energy of pyrophosphate hydrolysis as the driving force for proton movement across the membrane. Generates a proton motive force	hppA	-	3.6.1.1	ko:K15987	ko00190,map00190	-	-	-	ko00000,ko00001,ko01000	3.A.10.1	-	H_PPase
RA01000693.1	318996.AXAZ01000130_gene523	9.61e-80	238.0	COG0599@1|root,COG0599@2|Bacteria,1RH7V@1224|Proteobacteria,2UB7P@28211|Alphaproteobacteria,3JZMC@41294|Bradyrhizobiaceae	28211|Alphaproteobacteria	S	Carboxymuconolactone decarboxylase family	MA20_13090	-	4.1.1.44	ko:K01607	ko00362,ko01100,ko01120,ko01220,map00362,map01100,map01120,map01220	-	R03470	RC00938	ko00000,ko00001,ko01000	-	-	CMD
RA01000694.1	318996.AXAZ01000130_gene522	1.13e-92	271.0	COG0789@1|root,COG0789@2|Bacteria,1N9C6@1224|Proteobacteria,2UC87@28211|Alphaproteobacteria,3JYAT@41294|Bradyrhizobiaceae	28211|Alphaproteobacteria	K	MerR family	-	-	-	-	-	-	-	-	-	-	-	MerR,MerR-DNA-bind,MerR_1
RA01000695.1	224911.27353290	1.96e-228	630.0	COG3181@1|root,COG3181@2|Bacteria,1MU58@1224|Proteobacteria,2U1G0@28211|Alphaproteobacteria,3JSNV@41294|Bradyrhizobiaceae	28211|Alphaproteobacteria	S	Tripartite tricarboxylate transporter family receptor	MA20_36755	-	-	-	-	-	-	-	-	-	-	TctC
RA01000696.1	1304877.KI519399_gene4840	1.6e-105	305.0	COG2913@1|root,COG2913@2|Bacteria,1RHYM@1224|Proteobacteria,2UBU9@28211|Alphaproteobacteria,3JV18@41294|Bradyrhizobiaceae	28211|Alphaproteobacteria	J	SmpA / OmlA family	MA20_36760	-	-	-	-	-	-	-	-	-	-	SmpA_OmlA
RA01000697.1	224911.27353288	2.46e-120	344.0	COG5452@1|root,COG5452@2|Bacteria,1N12T@1224|Proteobacteria,2UCES@28211|Alphaproteobacteria,3JRTC@41294|Bradyrhizobiaceae	28211|Alphaproteobacteria	S	Ubiquinol-cytochrome C chaperone	-	-	-	ko:K17662	-	-	-	-	ko00000,ko03029	-	-	Ubiq_cyt_C_chap
RA01000698.1	318996.AXAZ01000130_gene518	2.15e-117	337.0	COG1399@1|root,COG1399@2|Bacteria,1N7C2@1224|Proteobacteria,2UC4J@28211|Alphaproteobacteria,3JTU8@41294|Bradyrhizobiaceae	28211|Alphaproteobacteria	S	Uncharacterized ACR, COG1399	-	-	-	ko:K07040	-	-	-	-	ko00000	-	-	DUF177
RA01000699.1	1126627.BAWE01000005_gene4831	2.82e-238	657.0	COG0416@1|root,COG0416@2|Bacteria,1MVM3@1224|Proteobacteria,2TR53@28211|Alphaproteobacteria,3JU5X@41294|Bradyrhizobiaceae	28211|Alphaproteobacteria	I	Catalyzes the reversible formation of acyl-phosphate (acyl-PO(4)) from acyl- acyl-carrier-protein (acyl-ACP). This enzyme utilizes acyl-ACP as fatty acyl donor, but not acyl-CoA	plsX	-	2.3.1.15	ko:K03621	ko00561,ko00564,ko01100,ko01110,map00561,map00564,map01100,map01110	M00089	R00851,R09380	RC00004,RC00039,RC00041	ko00000,ko00001,ko00002,ko01000,ko01004	-	-	FA_synthesis
RA01000700.1	224911.27353285	8.01e-229	630.0	COG0332@1|root,COG0332@2|Bacteria,1MU9N@1224|Proteobacteria,2TR60@28211|Alphaproteobacteria,3JR9U@41294|Bradyrhizobiaceae	28211|Alphaproteobacteria	I	Catalyzes the condensation reaction of fatty acid synthesis by the addition to an acyl acceptor of two carbons from malonyl-ACP. Catalyzes the first condensation reaction which initiates fatty acid synthesis and may therefore play a role in governing the total rate of fatty acid production. Possesses both acetoacetyl-ACP synthase and acetyl transacylase activities. Its substrate specificity deter…	fabH	-	2.3.1.180	ko:K00648	ko00061,ko01100,ko01212,map00061,map01100,map01212	M00082,M00083	R10707	RC00004,RC02729,RC02888	ko00000,ko00001,ko00002,ko01000,ko01004	-	-	ACP_syn_III,ACP_syn_III_C
RA01000701.1	1038867.AXAY01000003_gene3146	3.59e-78	233.0	COG0776@1|root,COG0776@2|Bacteria,1RH5Z@1224|Proteobacteria,2UCDG@28211|Alphaproteobacteria,3JYSB@41294|Bradyrhizobiaceae	28211|Alphaproteobacteria	K	This protein is one of the two subunits of integration host factor, a specific DNA-binding protein that functions in genetic recombination as well as in transcriptional and translational control	himA	-	-	ko:K04764	-	-	-	-	ko00000,ko03032,ko03036,ko03400	-	-	Bac_DNA_binding
RA01000702.1	1038862.KB893806_gene3358	4.39e-127	362.0	COG0789@1|root,COG0789@2|Bacteria,1RGYB@1224|Proteobacteria,2U9A5@28211|Alphaproteobacteria,3JQMB@41294|Bradyrhizobiaceae	28211|Alphaproteobacteria	K	helix_turn_helix, mercury resistance	merR	-	-	-	-	-	-	-	-	-	-	MerR_1
RA01000704.1	1449126.JQKL01000026_gene2434	7.56e-49	181.0	COG1078@1|root,COG1078@2|Bacteria,1TPVB@1239|Firmicutes,24DGJ@186801|Clostridia	186801|Clostridia	S	SMART metal-dependent phosphohydrolase, HD	-	-	-	ko:K06885	-	-	-	-	ko00000	-	-	HD
RA01000706.1	224911.27353255	3.17e-127	364.0	COG1309@1|root,COG1309@2|Bacteria,1R8KS@1224|Proteobacteria,2TSYV@28211|Alphaproteobacteria,3JURE@41294|Bradyrhizobiaceae	28211|Alphaproteobacteria	K	Bacterial regulatory proteins, tetR family	-	-	-	-	-	-	-	-	-	-	-	TetR_N
RA01000707.1	1037409.BJ6T_46960	9.71e-210	582.0	COG0657@1|root,COG0657@2|Bacteria,1RD8A@1224|Proteobacteria,2UAAU@28211|Alphaproteobacteria,3JU9G@41294|Bradyrhizobiaceae	28211|Alphaproteobacteria	I	Steryl acetyl hydrolase	-	-	-	-	-	-	-	-	-	-	-	Abhydrolase_3
RA01000708.1	936455.KI421499_gene2269	1.86e-52	164.0	2AR68@1|root,31GFV@2|Bacteria,1N0QQ@1224|Proteobacteria,2UE1A@28211|Alphaproteobacteria,3K0EB@41294|Bradyrhizobiaceae	28211|Alphaproteobacteria	-	-	MA20_36815	-	-	-	-	-	-	-	-	-	-	-
RA01000709.1	1126627.BAWE01000005_gene4821	2.97e-225	622.0	COG4221@1|root,COG4221@2|Bacteria,1QTXD@1224|Proteobacteria,2TVH8@28211|Alphaproteobacteria,3JS6S@41294|Bradyrhizobiaceae	28211|Alphaproteobacteria	S	KR domain	MA20_36825	-	-	-	-	-	-	-	-	-	-	adh_short
RA01000710.1	319003.Bra1253DRAFT_08281	1.43e-251	692.0	COG1073@1|root,COG1073@2|Bacteria,1MXJ3@1224|Proteobacteria,2TVHP@28211|Alphaproteobacteria,3JQQG@41294|Bradyrhizobiaceae	28211|Alphaproteobacteria	S	hydrolases or acyltransferases, alpha beta hydrolase superfamily	-	-	-	-	-	-	-	-	-	-	-	DUF1100,Peptidase_S9
RA01000711.1	318996.AXAZ01000078_gene2530	3.85e-103	300.0	COG1846@1|root,COG1846@2|Bacteria,1R3ZX@1224|Proteobacteria,2TR9P@28211|Alphaproteobacteria,3JV20@41294|Bradyrhizobiaceae	28211|Alphaproteobacteria	K	helix_turn_helix multiple antibiotic resistance protein	MA20_36835	-	-	-	-	-	-	-	-	-	-	MarR_2
RA01000712.1	1038867.AXAY01000003_gene3136	0.0	885.0	COG3203@1|root,COG3203@2|Bacteria,1MXN6@1224|Proteobacteria,2TSH7@28211|Alphaproteobacteria,3JQSQ@41294|Bradyrhizobiaceae	28211|Alphaproteobacteria	M	Forms passive diffusion pores that allow small molecular weight hydrophilic materials across the outer membrane	ropAch1	-	-	-	-	-	-	-	-	-	-	Porin_2
RA01000713.1	1054213.HMPREF9946_04097	8.38e-65	211.0	COG0583@1|root,COG0583@2|Bacteria,1MX2A@1224|Proteobacteria,2U1Y6@28211|Alphaproteobacteria,2JTQ3@204441|Rhodospirillales	204441|Rhodospirillales	K	LysR substrate binding domain	-	-	-	-	-	-	-	-	-	-	-	HTH_1,LysR_substrate
RA01000714.1	1336208.JADY01000015_gene1323	8.65e-48	170.0	COG3181@1|root,COG3181@2|Bacteria,1MU58@1224|Proteobacteria,2TQWK@28211|Alphaproteobacteria	28211|Alphaproteobacteria	S	Protein conserved in bacteria	-	-	-	-	-	-	-	-	-	-	-	TctC
RA01000715.1	1198452.Jab_1c22920	4.1e-158	462.0	COG3119@1|root,COG3119@2|Bacteria,1MUJH@1224|Proteobacteria,2WEXA@28216|Betaproteobacteria	28216|Betaproteobacteria	P	sulfatase	-	-	3.1.6.1	ko:K01130	ko00140,ko00600,map00140,map00600	-	R03980,R04856	RC00128,RC00231	ko00000,ko00001,ko01000	-	-	Sulfatase
RA01000716.1	318996.AXAZ01000078_gene2528	4.54e-97	285.0	COG5352@1|root,COG5352@2|Bacteria,1R3ZJ@1224|Proteobacteria,2TSMW@28211|Alphaproteobacteria,3JX9H@41294|Bradyrhizobiaceae	28211|Alphaproteobacteria	S	GcrA cell cycle regulator	-	-	-	ko:K13583	ko04112,map04112	-	-	-	ko00000,ko00001	-	-	GcrA
RA01000717.1	1037409.BJ6T_47040	2.58e-37	125.0	2C87S@1|root,348GR@2|Bacteria,1N1MG@1224|Proteobacteria,2UCQU@28211|Alphaproteobacteria,3K02R@41294|Bradyrhizobiaceae	28211|Alphaproteobacteria	-	-	QU41_33360	-	-	-	-	-	-	-	-	-	-	-
RA01000718.1	1038867.AXAY01000003_gene3133	3.81e-225	620.0	COG2421@1|root,COG2421@2|Bacteria,1MXKY@1224|Proteobacteria,2TSVA@28211|Alphaproteobacteria,3JSXD@41294|Bradyrhizobiaceae	28211|Alphaproteobacteria	C	Acetamidase/Formamidase family	MA20_36855	-	-	-	-	-	-	-	-	-	-	FmdA_AmdA
RA01000719.1	1038862.KB893806_gene3345	1.23e-183	511.0	COG2043@1|root,COG2043@2|Bacteria,1NR18@1224|Proteobacteria,2TVGP@28211|Alphaproteobacteria,3JU0D@41294|Bradyrhizobiaceae	28211|Alphaproteobacteria	S	Uncharacterised ArCR, COG2043	MA20_36865	-	-	-	-	-	-	-	-	-	-	DUF169
RA01000720.1	1304878.AUGD01000010_gene4550	1.27e-272	747.0	COG3268@1|root,COG3268@2|Bacteria,1MVI3@1224|Proteobacteria,2TV1G@28211|Alphaproteobacteria,3JR52@41294|Bradyrhizobiaceae	28211|Alphaproteobacteria	S	Saccharopine dehydrogenase NADP binding domain	-	-	-	-	-	-	-	-	-	-	-	Sacchrp_dh_NADP
RA01000721.1	1038862.KB893806_gene3343	6.46e-285	778.0	COG0654@1|root,COG0654@2|Bacteria,1MWWT@1224|Proteobacteria,2TUGT@28211|Alphaproteobacteria,3JRKG@41294|Bradyrhizobiaceae	28211|Alphaproteobacteria	CH	FAD binding domain	MA20_36880	-	1.14.13.1,1.14.13.113,1.14.13.114	ko:K00480,ko:K14974,ko:K16839	ko00230,ko00621,ko00624,ko00626,ko00760,ko01100,ko01120,ko01220,map00230,map00621,map00624,map00626,map00760,map01100,map01120,map01220	M00546,M00622	R00818,R05632,R06915,R06936,R06939,R08764,R09514	RC00115,RC00389,RC02551	ko00000,ko00001,ko00002,ko01000	-	-	FAD_binding_3
RA01000722.1	224911.27353241	7.83e-109	315.0	COG1846@1|root,COG1846@2|Bacteria,1N6YD@1224|Proteobacteria,2U0SG@28211|Alphaproteobacteria,3JSZ7@41294|Bradyrhizobiaceae	28211|Alphaproteobacteria	K	helix_turn_helix multiple antibiotic resistance protein	MA20_36885	-	-	-	-	-	-	-	-	-	-	MarR,MarR_2
RA01000723.1	1037409.BJ6T_47120	4.93e-272	748.0	COG3307@1|root,COG3307@2|Bacteria,1MWJM@1224|Proteobacteria,2TRG6@28211|Alphaproteobacteria,3JUWK@41294|Bradyrhizobiaceae	28211|Alphaproteobacteria	M	-O-antigen	MA20_36890	-	-	-	-	-	-	-	-	-	-	Wzy_C
RA01000724.1	224911.27353239	0.0	980.0	COG1086@1|root,COG2148@1|root,COG1086@2|Bacteria,COG2148@2|Bacteria,1MV6W@1224|Proteobacteria,2TRZA@28211|Alphaproteobacteria,3JSJ2@41294|Bradyrhizobiaceae	28211|Alphaproteobacteria	M	CoA-binding domain	wcaJ	-	-	ko:K03606,ko:K20997	ko02025,ko05111,map02025,map05111	-	-	-	ko00000,ko00001	-	-	Bac_transf,CoA_binding_3
RA01000725.1	1038866.KB902791_gene3253	1.62e-256	705.0	COG0438@1|root,COG0438@2|Bacteria,1MVKK@1224|Proteobacteria,2TSHP@28211|Alphaproteobacteria,3JTSD@41294|Bradyrhizobiaceae	28211|Alphaproteobacteria	M	glycosyl transferase group 1	MA20_36900	-	-	-	-	-	-	-	-	-	-	Glyco_trans_1_4,Glyco_trans_4_4,Glyco_transf_4,Glycos_transf_1
RA01000726.1	318996.AXAZ01000078_gene2517	0.0	1226.0	COG3206@1|root,COG3206@2|Bacteria,1RK0N@1224|Proteobacteria,2TSFQ@28211|Alphaproteobacteria,3JS8J@41294|Bradyrhizobiaceae	28211|Alphaproteobacteria	M	Chain length determinant protein	-	-	-	-	-	-	-	-	-	-	-	GNVR,Wzz
RA01000727.1	1037409.BJ6T_47160	8.32e-258	709.0	COG5653@1|root,COG5653@2|Bacteria,1MVAR@1224|Proteobacteria,2TTKY@28211|Alphaproteobacteria,3JRH4@41294|Bradyrhizobiaceae	28211|Alphaproteobacteria	M	Acetyltransferase (GNAT) domain	-	-	-	-	-	-	-	-	-	-	-	Acetyltransf_6
RA01000728.1	1038866.KB902791_gene3256	6.35e-227	628.0	COG0726@1|root,COG0726@2|Bacteria,1MVVK@1224|Proteobacteria,2TV75@28211|Alphaproteobacteria,3JTJU@41294|Bradyrhizobiaceae	28211|Alphaproteobacteria	G	polysaccharide deacetylase	-	-	-	-	-	-	-	-	-	-	-	Polysacc_deac_1
RA01000729.1	1038867.AXAY01000003_gene3120	1.96e-44	144.0	2EFTF@1|root,339JI@2|Bacteria,1N78S@1224|Proteobacteria,2UG3X@28211|Alphaproteobacteria,3K0ZB@41294|Bradyrhizobiaceae	28211|Alphaproteobacteria	S	Protein of unknown function (DUF2842)	MA20_36920	-	-	-	-	-	-	-	-	-	-	DUF2842
RA01000730.1	1038862.KB893806_gene3334	1.48e-232	643.0	COG1612@1|root,COG1612@2|Bacteria,1MVJ4@1224|Proteobacteria,2TR0M@28211|Alphaproteobacteria,3JR20@41294|Bradyrhizobiaceae	28211|Alphaproteobacteria	O	Catalyzes the oxidation of the C8 methyl side group on heme O porphyrin ring into a formyl group	ctaA	-	-	ko:K02259	ko00190,ko00860,ko01100,ko01110,ko02020,ko04714,map00190,map00860,map01100,map01110,map02020,map04714	M00154	R07412	RC00769	ko00000,ko00001,ko00002,ko03029	3.D.4.4	-	COX15-CtaA
RA01000731.1	1038866.KB902791_gene3259	1.31e-66	203.0	2A7YT@1|root,30WYW@2|Bacteria,1RF6R@1224|Proteobacteria,2U7U1@28211|Alphaproteobacteria,3JZ67@41294|Bradyrhizobiaceae	28211|Alphaproteobacteria	-	-	-	-	-	-	-	-	-	-	-	-	-	-
RA01000732.1	319003.Bra1253DRAFT_08306	2.65e-305	832.0	COG2873@1|root,COG2873@2|Bacteria,1NQME@1224|Proteobacteria,2TQW9@28211|Alphaproteobacteria,3JTRP@41294|Bradyrhizobiaceae	28211|Alphaproteobacteria	E	Beta-eliminating lyase	metY	GO:0000096,GO:0000097,GO:0003674,GO:0003824,GO:0003961,GO:0004124,GO:0006082,GO:0006520,GO:0006534,GO:0006535,GO:0006555,GO:0006563,GO:0006790,GO:0006807,GO:0008150,GO:0008152,GO:0008652,GO:0009058,GO:0009066,GO:0009067,GO:0009069,GO:0009070,GO:0009086,GO:0009987,GO:0016053,GO:0016740,GO:0016765,GO:0017144,GO:0019344,GO:0019752,GO:0043436,GO:0044237,GO:0044238,GO:0044249,GO:0044272,GO:0044281,GO:…	2.5.1.47,2.5.1.49	ko:K01738,ko:K01740	ko00270,ko00920,ko01100,ko01110,ko01120,ko01130,ko01200,ko01230,map00270,map00920,map01100,map01110,map01120,map01130,map01200,map01230	M00021	R00897,R01287,R03601,R04859	RC00020,RC02814,RC02821,RC02848	ko00000,ko00001,ko00002,ko01000	-	-	Cys_Met_Meta_PP
RA01000733.1	1038862.KB893806_gene3331	1.31e-134	381.0	COG1832@1|root,COG1832@2|Bacteria,1N03D@1224|Proteobacteria,2TUIY@28211|Alphaproteobacteria,3JQQK@41294|Bradyrhizobiaceae	28211|Alphaproteobacteria	S	CoA binding domain	yccU	GO:0005575,GO:0005622,GO:0005623,GO:0005737,GO:0005829,GO:0044424,GO:0044444,GO:0044464	-	ko:K06929	-	-	-	-	ko00000	-	-	CoA_binding_2
RA01000734.1	1037409.BJ6T_47230	1.52e-175	491.0	COG1024@1|root,COG1024@2|Bacteria,1MUJ7@1224|Proteobacteria,2TTMB@28211|Alphaproteobacteria,3JRTP@41294|Bradyrhizobiaceae	28211|Alphaproteobacteria	I	enoyl-CoA hydratase	MA20_36945	-	-	-	-	-	-	-	-	-	-	ECH_1
RA01000735.1	1037409.BJ6T_47240	5.01e-91	267.0	COG2050@1|root,COG2050@2|Bacteria,1MZRJ@1224|Proteobacteria,2U9BM@28211|Alphaproteobacteria,3JY5S@41294|Bradyrhizobiaceae	28211|Alphaproteobacteria	Q	Thioesterase superfamily	MA20_36950	-	-	-	-	-	-	-	-	-	-	4HBT
RA01000736.1	1038866.KB902791_gene3264	8.75e-109	313.0	COG0102@1|root,COG0102@2|Bacteria,1RA11@1224|Proteobacteria,2U5FM@28211|Alphaproteobacteria,3JUX1@41294|Bradyrhizobiaceae	28211|Alphaproteobacteria	J	This protein is one of the early assembly proteins of the 50S ribosomal subunit, although it is not seen to bind rRNA by itself. It is important during the early stages of 50S assembly	rplM	GO:0003674,GO:0003676,GO:0003723,GO:0003729,GO:0003735,GO:0005198,GO:0005488,GO:0005575,GO:0005622,GO:0005623,GO:0005737,GO:0005829,GO:0005840,GO:0006412,GO:0006518,GO:0006807,GO:0008150,GO:0008152,GO:0009058,GO:0009059,GO:0009987,GO:0010467,GO:0015934,GO:0019538,GO:0022625,GO:0022626,GO:0032991,GO:0034641,GO:0034645,GO:0043043,GO:0043170,GO:0043226,GO:0043228,GO:0043229,GO:0043232,GO:0043603,GO:…	-	ko:K02871	ko03010,map03010	M00178,M00179	-	-	br01610,ko00000,ko00001,ko00002,ko03011	-	-	Ribosomal_L13
RA01000737.1	1304877.KI519399_gene4876	4.11e-105	304.0	COG0103@1|root,COG0103@2|Bacteria,1RD4A@1224|Proteobacteria,2U5B5@28211|Alphaproteobacteria,3JR49@41294|Bradyrhizobiaceae	28211|Alphaproteobacteria	J	Belongs to the universal ribosomal protein uS9 family	rpsI	GO:0000462,GO:0003674,GO:0003676,GO:0003723,GO:0003735,GO:0005198,GO:0005488,GO:0005575,GO:0005622,GO:0005623,GO:0005737,GO:0005829,GO:0005840,GO:0006139,GO:0006364,GO:0006396,GO:0006412,GO:0006518,GO:0006725,GO:0006807,GO:0008150,GO:0008152,GO:0009058,GO:0009059,GO:0009987,GO:0010467,GO:0015935,GO:0016070,GO:0016072,GO:0019538,GO:0022613,GO:0022626,GO:0022627,GO:0030490,GO:0032991,GO:0034470,GO:…	-	ko:K02996	ko03010,map03010	M00178,M00179	-	-	br01610,ko00000,ko00001,ko00002,ko03011	-	-	Ribosomal_S9
RA01000738.1	1304877.KI519399_gene4877	4.03e-283	775.0	COG2199@1|root,COG3706@2|Bacteria,1MZV7@1224|Proteobacteria,2TRAF@28211|Alphaproteobacteria,3JR84@41294|Bradyrhizobiaceae	28211|Alphaproteobacteria	T	Diguanylate cyclase	MA20_36965	-	-	-	-	-	-	-	-	-	-	GGDEF
RA01000739.1	1038862.KB893806_gene3325	2.59e-45	146.0	29CMW@1|root,2ZZK5@2|Bacteria,1N0R2@1224|Proteobacteria,2UFKQ@28211|Alphaproteobacteria,3K0YI@41294|Bradyrhizobiaceae	28211|Alphaproteobacteria	-	-	-	-	-	-	-	-	-	-	-	-	-	-
RA01000740.1	1126627.BAWE01000005_gene4792	8.16e-67	202.0	COG2329@1|root,COG2329@2|Bacteria,1N078@1224|Proteobacteria,2U99H@28211|Alphaproteobacteria,3JZCG@41294|Bradyrhizobiaceae	28211|Alphaproteobacteria	S	Antibiotic biosynthesis monooxygenase	MA20_36975	-	-	-	-	-	-	-	-	-	-	ABM
RA01000741.1	936455.KI421499_gene2301	3.39e-227	631.0	COG0628@1|root,COG0628@2|Bacteria,1MW0B@1224|Proteobacteria,2TQSH@28211|Alphaproteobacteria,3JUWT@41294|Bradyrhizobiaceae	28211|Alphaproteobacteria	S	AI-2E family transporter	-	-	-	-	-	-	-	-	-	-	-	AI-2E_transport
RA01000742.1	1304877.KI519399_gene4886	7.18e-186	516.0	COG2071@1|root,COG2071@2|Bacteria,1MV8E@1224|Proteobacteria,2TSU3@28211|Alphaproteobacteria,3JTEG@41294|Bradyrhizobiaceae	28211|Alphaproteobacteria	S	Peptidase C26	puuD	-	-	ko:K07010	-	-	-	-	ko00000,ko01002	-	-	Peptidase_C26
RA01000743.1	318996.AXAZ01000031_gene3286	2.94e-83	249.0	COG0454@1|root,COG0456@2|Bacteria,1RCTN@1224|Proteobacteria,2U6VF@28211|Alphaproteobacteria,3JYK5@41294|Bradyrhizobiaceae	28211|Alphaproteobacteria	K	FR47-like protein	-	-	-	-	-	-	-	-	-	-	-	Acetyltransf_10
RA01000744.1	335659.S23_32310	1.57e-198	554.0	COG4977@1|root,COG4977@2|Bacteria,1MXAU@1224|Proteobacteria,2VF3N@28211|Alphaproteobacteria,3JT8J@41294|Bradyrhizobiaceae	28211|Alphaproteobacteria	K	helix_turn_helix, arabinose operon control protein	-	-	-	-	-	-	-	-	-	-	-	DJ-1_PfpI,HTH_18
RA01000745.1	1037409.BJ6T_47340	1.86e-50	160.0	COG1942@1|root,COG1942@2|Bacteria,1NBW3@1224|Proteobacteria,2UHFK@28211|Alphaproteobacteria,3JZW0@41294|Bradyrhizobiaceae	28211|Alphaproteobacteria	S	Tautomerase enzyme	-	-	5.3.2.6	ko:K01821	ko00362,ko00621,ko00622,ko01100,ko01120,ko01220,map00362,map00621,map00622,map01100,map01120,map01220	M00569	R03966,R05389	RC01040,RC01355	ko00000,ko00001,ko00002,ko01000	-	-	Tautomerase
RA01000746.1	318996.AXAZ01000078_gene2498	1.37e-294	809.0	COG1030@1|root,COG1030@2|Bacteria,1MUJN@1224|Proteobacteria,2U0TP@28211|Alphaproteobacteria,3JT23@41294|Bradyrhizobiaceae	28211|Alphaproteobacteria	O	NfeD-like C-terminal, partner-binding	nfeD	-	-	ko:K07403	-	-	-	-	ko00000	-	-	NfeD
RA01000747.1	1038866.KB902791_gene3277	4.72e-164	461.0	COG0330@1|root,COG0330@2|Bacteria,1MUM8@1224|Proteobacteria,2TRUY@28211|Alphaproteobacteria,3JQPQ@41294|Bradyrhizobiaceae	28211|Alphaproteobacteria	O	prohibitin homologues	-	-	-	-	-	-	-	-	-	-	-	Band_7
RA01000748.1	224911.27353215	7.87e-249	686.0	COG0252@1|root,COG0252@2|Bacteria,1MWIR@1224|Proteobacteria,2U1B3@28211|Alphaproteobacteria,3JT6S@41294|Bradyrhizobiaceae	28211|Alphaproteobacteria	EJ	Asparaginase	ansB	-	3.5.1.1,3.5.1.38	ko:K01424,ko:K05597	ko00220,ko00250,ko00460,ko00471,ko01100,ko01110,ko02020,map00220,map00250,map00460,map00471,map01100,map01110,map02020	-	R00256,R00485,R01579	RC00010,RC02798	ko00000,ko00001,ko01000	-	-	Asparaginase
RA01000749.1	224911.27353214	0.0	962.0	COG0174@1|root,COG0174@2|Bacteria,1MUGQ@1224|Proteobacteria,2TSCR@28211|Alphaproteobacteria,3JTH1@41294|Bradyrhizobiaceae	28211|Alphaproteobacteria	E	glutamine synthetase	glnA	-	6.3.1.2	ko:K01915	ko00220,ko00250,ko00630,ko00910,ko01100,ko01120,ko01230,ko02020,ko04217,ko04724,ko04727,map00220,map00250,map00630,map00910,map01100,map01120,map01230,map02020,map04217,map04724,map04727	-	R00253	RC00010,RC02798	ko00000,ko00001,ko01000,ko04147	-	-	Gln-synt_C,Gln-synt_N
RA01000750.1	1037409.BJ6T_47390	7.34e-72	216.0	COG0347@1|root,COG0347@2|Bacteria,1RGWK@1224|Proteobacteria,2U73Z@28211|Alphaproteobacteria,3JYUA@41294|Bradyrhizobiaceae	28211|Alphaproteobacteria	K	Belongs to the P(II) protein family	glnB	GO:0003674,GO:0006808,GO:0008150,GO:0030234,GO:0050789,GO:0050790,GO:0065007,GO:0065009,GO:0098772	-	ko:K04751	ko02020,map02020	-	-	-	ko00000,ko00001	-	-	P-II
RA01000751.1	1038862.KB893806_gene3313	0.0	916.0	COG0062@1|root,COG0063@1|root,COG0062@2|Bacteria,COG0063@2|Bacteria,1MU1Q@1224|Proteobacteria,2TT58@28211|Alphaproteobacteria,3JU34@41294|Bradyrhizobiaceae	28211|Alphaproteobacteria	G	Bifunctional enzyme that catalyzes the epimerization of the S- and R-forms of NAD(P)HX and the dehydration of the S-form of NAD(P)HX at the expense of ADP, which is converted to AMP. This allows the repair of both epimers of NAD(P)HX, a damaged form of NAD(P)H that is a result of enzymatic or heat-dependent hydration	nnrD	-	-	-	-	-	-	-	-	-	-	Carb_kinase,YjeF_N
RA01000752.1	1037409.BJ6T_47410	1.27e-92	271.0	COG0454@1|root,COG0456@2|Bacteria,1N891@1224|Proteobacteria,2U6U9@28211|Alphaproteobacteria,3JZ6N@41294|Bradyrhizobiaceae	28211|Alphaproteobacteria	K	Acetyltransferase (GNAT) domain	-	-	-	-	-	-	-	-	-	-	-	Acetyltransf_1,Acetyltransf_10,Acetyltransf_7
RA01000753.1	224911.27353211	6.85e-266	734.0	COG2132@1|root,COG2132@2|Bacteria,1MU0J@1224|Proteobacteria,2TQXH@28211|Alphaproteobacteria,3JRZF@41294|Bradyrhizobiaceae	28211|Alphaproteobacteria	Q	Multicopper oxidase	-	-	-	-	-	-	-	-	-	-	-	Cu-oxidase,Cu-oxidase_2,Cu-oxidase_3
RA01000755.1	224911.27353210	2.54e-303	830.0	COG0544@1|root,COG0544@2|Bacteria,1MUJP@1224|Proteobacteria,2TS8W@28211|Alphaproteobacteria,3JSQU@41294|Bradyrhizobiaceae	28211|Alphaproteobacteria	O	Involved in protein export. Acts as a chaperone by maintaining the newly synthesized protein in an open conformation. Functions as a peptidyl-prolyl cis-trans isomerase	tig	GO:0005575,GO:0005622,GO:0005623,GO:0005737,GO:0044424,GO:0044464	-	ko:K03545	-	-	-	-	ko00000	-	-	FKBP_C,Trigger_C,Trigger_N
RA01000756.1	1038862.KB893806_gene3310	7.48e-147	414.0	COG0740@1|root,COG0740@2|Bacteria,1MV46@1224|Proteobacteria,2TR5M@28211|Alphaproteobacteria,3JV9B@41294|Bradyrhizobiaceae	28211|Alphaproteobacteria	OU	Cleaves peptides in various proteins in a process that requires ATP hydrolysis. Has a chymotrypsin-like activity. Plays a major role in the degradation of misfolded proteins	clpP	-	3.4.21.92	ko:K01358	ko04112,ko04212,map04112,map04212	-	-	-	ko00000,ko00001,ko01000,ko01002	-	-	CLP_protease
RA01000757.1	1126627.BAWE01000005_gene4781	6.7e-302	823.0	COG1219@1|root,COG1219@2|Bacteria,1MVQK@1224|Proteobacteria,2TS3R@28211|Alphaproteobacteria,3JQY9@41294|Bradyrhizobiaceae	28211|Alphaproteobacteria	O	ATP-dependent specificity component of the Clp protease. It directs the protease to specific substrates. Can perform chaperone functions in the absence of ClpP	clpX	GO:0000166,GO:0003674,GO:0003824,GO:0004176,GO:0005488,GO:0005524,GO:0006508,GO:0006807,GO:0008144,GO:0008150,GO:0008152,GO:0008233,GO:0009056,GO:0009057,GO:0009987,GO:0016462,GO:0016787,GO:0016817,GO:0016818,GO:0016887,GO:0017076,GO:0017111,GO:0019538,GO:0030163,GO:0030554,GO:0032553,GO:0032555,GO:0032559,GO:0035639,GO:0036094,GO:0042623,GO:0043167,GO:0043168,GO:0043170,GO:0044238,GO:0051301,GO:…	-	ko:K03544	ko04112,map04112	-	-	-	ko00000,ko00001,ko03110	-	-	AAA_2,ClpB_D2-small,zf-C4_ClpX
RA01000758.1	1038862.KB893806_gene3308	0.0	1528.0	COG0466@1|root,COG0466@2|Bacteria,1MUV2@1224|Proteobacteria,2TR4E@28211|Alphaproteobacteria,3JRVR@41294|Bradyrhizobiaceae	28211|Alphaproteobacteria	O	ATP-dependent serine protease that mediates the selective degradation of mutant and abnormal proteins as well as certain short-lived regulatory proteins. Required for cellular homeostasis and for survival from DNA damage and developmental changes induced by stress. Degrades polypeptides processively to yield small peptide fragments that are 5 to 10 amino acids long. Binds to DNA in a double-stran…	lon	-	3.4.21.53	ko:K01338	ko04112,map04112	-	-	-	ko00000,ko00001,ko01000,ko01002	-	-	AAA,LON_substr_bdg,Lon_C
RA01000759.1	1038866.KB902791_gene3290	2.97e-95	277.0	COG3791@1|root,COG3791@2|Bacteria,1RBIH@1224|Proteobacteria,2U5D0@28211|Alphaproteobacteria,3JY48@41294|Bradyrhizobiaceae	28211|Alphaproteobacteria	S	Glutathione-dependent formaldehyde-activating enzyme	-	-	-	-	-	-	-	-	-	-	-	GFA
RA01000761.1	318996.AXAZ01000048_gene6835	1.34e-52	168.0	2AKZ3@1|root,31BSR@2|Bacteria,1MY7G@1224|Proteobacteria,2UB7V@28211|Alphaproteobacteria,3K004@41294|Bradyrhizobiaceae	28211|Alphaproteobacteria	-	-	-	-	-	-	-	-	-	-	-	-	-	-
RA01000762.1	1037409.BJ6T_47510	4.82e-194	539.0	COG0500@1|root,COG2226@2|Bacteria,1PPKI@1224|Proteobacteria,2TRIB@28211|Alphaproteobacteria,3JRP5@41294|Bradyrhizobiaceae	28211|Alphaproteobacteria	Q	ubiE/COQ5 methyltransferase family	MA20_37085	-	-	-	-	-	-	-	-	-	-	Methyltransf_11,Methyltransf_25
RA01000763.1	1304877.KI519399_gene4899	3.99e-187	525.0	COG1230@1|root,COG1230@2|Bacteria,1MVQB@1224|Proteobacteria,2TR65@28211|Alphaproteobacteria,3JTI5@41294|Bradyrhizobiaceae	28211|Alphaproteobacteria	P	cation efflux	czcD	-	-	ko:K16264	-	-	-	-	ko00000,ko02000	2.A.4.1	-	Cation_efflux
RA01000764.1	1304878.AUGD01000010_gene4583	0.0	1875.0	COG3696@1|root,COG3696@2|Bacteria,1NUIV@1224|Proteobacteria,2TRWM@28211|Alphaproteobacteria,3JRVP@41294|Bradyrhizobiaceae	28211|Alphaproteobacteria	P	Belongs to the resistance-nodulation-cell division (RND) (TC 2.A.6) family	MA20_37095	-	-	ko:K15726	-	-	-	-	ko00000,ko02000	2.A.6.1.2	-	ACR_tran
RA01000765.1	1037409.BJ6T_47540	1.76e-211	587.0	COG0845@1|root,COG0845@2|Bacteria,1MX8W@1224|Proteobacteria,2TRPM@28211|Alphaproteobacteria,3JQVP@41294|Bradyrhizobiaceae	28211|Alphaproteobacteria	M	Belongs to the membrane fusion protein (MFP) (TC 8.A.1) family	MA20_37100	-	-	ko:K15727	-	-	-	-	ko00000,ko02000	8.A.1.2.1	-	HlyD_3,HlyD_D23
RA01000766.1	319003.Bra1253DRAFT_08336	3.37e-275	756.0	COG1538@1|root,COG1538@2|Bacteria,1NEZC@1224|Proteobacteria,2TTFK@28211|Alphaproteobacteria,3JQV0@41294|Bradyrhizobiaceae	28211|Alphaproteobacteria	MU	Outer membrane efflux protein	MA20_37105	-	-	ko:K15725	-	-	-	-	ko00000,ko02000	1.B.17.2.2	-	OEP
RA01000767.1	224911.27353199	3.88e-60	187.0	2C40Q@1|root,2ZYAZ@2|Bacteria,1RJM7@1224|Proteobacteria,2UA26@28211|Alphaproteobacteria,3JZYH@41294|Bradyrhizobiaceae	28211|Alphaproteobacteria	-	-	-	-	-	-	-	-	-	-	-	-	-	-
RA01000768.1	224911.27353198	0.0	1871.0	COG3696@1|root,COG3696@2|Bacteria,1NUIV@1224|Proteobacteria,2TRWM@28211|Alphaproteobacteria,3JRIE@41294|Bradyrhizobiaceae	28211|Alphaproteobacteria	P	Belongs to the resistance-nodulation-cell division (RND) (TC 2.A.6) family	-	-	-	ko:K07787	ko02020,map02020	-	-	-	ko00000,ko00001,ko02000	2.A.6.1.4	-	ACR_tran
RA01000769.1	443598.AUFA01000003_gene2043	3.5e-263	731.0	COG0845@1|root,COG0845@2|Bacteria,1MVAS@1224|Proteobacteria,2TTGG@28211|Alphaproteobacteria,3JTB0@41294|Bradyrhizobiaceae	28211|Alphaproteobacteria	M	Belongs to the membrane fusion protein (MFP) (TC 8.A.1) family	cusB	-	-	ko:K07798	ko02020,map02020	-	-	-	ko00000,ko00001,ko02000	2.A.6.1.4,8.A.1	-	CusF_Ec,HlyD_D23,HlyD_D4
RA01000770.1	189753.AXAS01000077_gene367	3.15e-74	224.0	COG0845@1|root,COG0845@2|Bacteria,1RD9V@1224|Proteobacteria,2U7AW@28211|Alphaproteobacteria,3JYZ1@41294|Bradyrhizobiaceae	28211|Alphaproteobacteria	M	YtkA-like	-	-	-	-	-	-	-	-	-	-	-	YtkA
RA01000771.1	189753.AXAS01000077_gene366	1.58e-49	165.0	2A0KD@1|root,30NQK@2|Bacteria,1RGRE@1224|Proteobacteria,2U8FT@28211|Alphaproteobacteria,3JZ70@41294|Bradyrhizobiaceae	28211|Alphaproteobacteria	-	-	-	-	-	-	-	-	-	-	-	-	-	-
RA01000772.1	319003.Bra1253DRAFT_08339	7.54e-176	494.0	2DMG3@1|root,32RAX@2|Bacteria,1QW8A@1224|Proteobacteria,2TWSG@28211|Alphaproteobacteria,3JVP1@41294|Bradyrhizobiaceae	28211|Alphaproteobacteria	-	-	-	-	-	-	-	-	-	-	-	-	-	-
RA01000773.1	1304878.AUGD01000010_gene4589	6.88e-296	808.0	COG2195@1|root,COG2195@2|Bacteria,1MV7D@1224|Proteobacteria,2TRNW@28211|Alphaproteobacteria,3JSXW@41294|Bradyrhizobiaceae	28211|Alphaproteobacteria	E	Cleaves the N-terminal amino acid of tripeptides	pepT	-	3.4.11.4	ko:K01258	-	-	-	-	ko00000,ko01000,ko01002	-	-	M20_dimer,Peptidase_M20
RA01000774.1	224911.27353190	5.31e-59	182.0	COG0776@1|root,COG0776@2|Bacteria,1MZ5B@1224|Proteobacteria,2UC5G@28211|Alphaproteobacteria,3JZG5@41294|Bradyrhizobiaceae	28211|Alphaproteobacteria	L	Belongs to the bacterial histone-like protein family	hupA	-	-	ko:K03530	-	-	-	-	ko00000,ko03032,ko03036,ko03400	-	-	Bac_DNA_binding
RA01000777.1	1304877.KI519399_gene4909	0.0	915.0	COG4249@1|root,COG4249@2|Bacteria,1MXFD@1224|Proteobacteria,2TRW5@28211|Alphaproteobacteria,3JUHG@41294|Bradyrhizobiaceae	28211|Alphaproteobacteria	S	Caspase domain	-	-	-	-	-	-	-	-	-	-	-	Peptidase_C14
RA01000778.1	1304877.KI519399_gene4908	1.13e-164	482.0	COG0790@1|root,COG4249@1|root,COG0790@2|Bacteria,COG4249@2|Bacteria,1MXFD@1224|Proteobacteria,2TRW5@28211|Alphaproteobacteria,3JUHG@41294|Bradyrhizobiaceae	28211|Alphaproteobacteria	S	Caspase domain	-	-	-	-	-	-	-	-	-	-	-	Peptidase_C14
RA01000780.1	335659.S23_32570	1.17e-34	119.0	2BP6F@1|root,30CC3@2|Bacteria,1NAM3@1224|Proteobacteria,2UG0J@28211|Alphaproteobacteria,3K1F4@41294|Bradyrhizobiaceae	28211|Alphaproteobacteria	-	-	-	-	-	-	-	-	-	-	-	-	-	-
RA01000781.1	1038866.KB902791_gene3305	9.85e-283	776.0	COG2271@1|root,COG2271@2|Bacteria,1MWYR@1224|Proteobacteria,2TSXW@28211|Alphaproteobacteria,3JTZP@41294|Bradyrhizobiaceae	28211|Alphaproteobacteria	G	Transmembrane secretion effector	-	-	-	-	-	-	-	-	-	-	-	MFS_1
RA01000782.1	1038866.KB902791_gene3306	8.3e-296	806.0	COG4638@1|root,COG4638@2|Bacteria,1MX47@1224|Proteobacteria,2TV3I@28211|Alphaproteobacteria,3JS2U@41294|Bradyrhizobiaceae	28211|Alphaproteobacteria	P	Rieske [2Fe-2S] domain	-	-	1.14.13.229,1.14.19.48	ko:K21323	-	-	-	-	ko00000,ko01000	-	-	Rieske,Ring_hydroxyl_A
RA01000783.1	318996.AXAZ01000048_gene6816	1.46e-92	273.0	COG1846@1|root,COG1846@2|Bacteria,1R6ZW@1224|Proteobacteria,2U1UE@28211|Alphaproteobacteria,3JX7K@41294|Bradyrhizobiaceae	28211|Alphaproteobacteria	K	helix_turn_helix multiple antibiotic resistance protein	-	-	-	-	-	-	-	-	-	-	-	MarR_2
RA01000784.1	224911.27353185	0.0	1408.0	COG4773@1|root,COG4773@2|Bacteria,1QTT0@1224|Proteobacteria,2TQSQ@28211|Alphaproteobacteria,3JQP4@41294|Bradyrhizobiaceae	28211|Alphaproteobacteria	P	TonB dependent receptor	-	-	-	ko:K02014	-	-	-	-	ko00000,ko02000	1.B.14	-	Plug,TonB_dep_Rec
RA01000785.1	1038867.AXAY01000003_gene3074	5.85e-255	701.0	COG3182@1|root,COG3182@2|Bacteria,1MW2S@1224|Proteobacteria,2TSFC@28211|Alphaproteobacteria,3JW59@41294|Bradyrhizobiaceae	28211|Alphaproteobacteria	S	PepSY-associated TM region	-	-	-	-	-	-	-	-	-	-	-	PepSY_TM
RA01000786.1	1037409.BJ6T_47680	1.46e-39	132.0	2APD6@1|root,31EFN@2|Bacteria,1NFAX@1224|Proteobacteria,2UHC3@28211|Alphaproteobacteria,3K15D@41294|Bradyrhizobiaceae	28211|Alphaproteobacteria	-	-	-	-	-	-	-	-	-	-	-	-	-	-
RA01000787.1	1038862.KB893806_gene3279	2.03e-80	238.0	COG0838@1|root,COG0838@2|Bacteria,1RGUT@1224|Proteobacteria,2U72Q@28211|Alphaproteobacteria,3JYST@41294|Bradyrhizobiaceae	28211|Alphaproteobacteria	C	NDH-1 shuttles electrons from NADH, via FMN and iron- sulfur (Fe-S) centers, to quinones in the respiratory chain. The immediate electron acceptor for the enzyme in this species is believed to be ubiquinone. Couples the redox reaction to proton translocation (for every two electrons transferred, four hydrogen ions are translocated across the cytoplasmic membrane), and thus conserves the redox ene…	nuoA	GO:0005575,GO:0005623,GO:0005886,GO:0016020,GO:0044464,GO:0071944	1.6.5.3	ko:K00330	ko00190,ko01100,map00190,map01100	M00144	R11945	RC00061	ko00000,ko00001,ko00002,ko01000	3.D.1	-	Oxidored_q4
RA01000788.1	224911.27353183	8.7e-142	400.0	COG0377@1|root,COG0377@2|Bacteria,1MUI2@1224|Proteobacteria,2TQK3@28211|Alphaproteobacteria,3JTBJ@41294|Bradyrhizobiaceae	28211|Alphaproteobacteria	C	NDH-1 shuttles electrons from NADH, via FMN and iron- sulfur (Fe-S) centers, to quinones in the respiratory chain. The immediate electron acceptor for the enzyme in this species is believed to be ubiquinone. Couples the redox reaction to proton translocation (for every two electrons transferred, four hydrogen ions are translocated across the cytoplasmic membrane), and thus conserves the redox ene…	nuoB	GO:0003674,GO:0003824,GO:0003954,GO:0008150,GO:0008152,GO:0016491,GO:0016651,GO:0016655,GO:0050136,GO:0055114	1.6.5.3	ko:K00331	ko00190,ko01100,map00190,map01100	M00144	R11945	RC00061	ko00000,ko00001,ko00002,ko01000	3.D.1	-	Oxidored_q6
RA01000789.1	1038862.KB893806_gene3277	1.93e-143	404.0	COG0852@1|root,COG0852@2|Bacteria,1MX4B@1224|Proteobacteria,2TSMT@28211|Alphaproteobacteria,3JT07@41294|Bradyrhizobiaceae	28211|Alphaproteobacteria	C	NDH-1 shuttles electrons from NADH, via FMN and iron- sulfur (Fe-S) centers, to quinones in the respiratory chain. The immediate electron acceptor for the enzyme in this species is believed to be ubiquinone. Couples the redox reaction to proton translocation (for every two electrons transferred, four hydrogen ions are translocated across the cytoplasmic membrane), and thus conserves the redox ene…	nuoC	GO:0003674,GO:0003824,GO:0003954,GO:0008150,GO:0008152,GO:0016491,GO:0016651,GO:0016655,GO:0050136,GO:0055114	1.6.5.3	ko:K00332	ko00190,ko01100,map00190,map01100	M00144	R11945	RC00061	ko00000,ko00001,ko00002,ko01000	3.D.1	-	Complex1_30kDa
RA01000790.1	1038862.KB893806_gene3276	7.43e-300	816.0	COG0649@1|root,COG0649@2|Bacteria,1MVIN@1224|Proteobacteria,2TQZ0@28211|Alphaproteobacteria,3JSWA@41294|Bradyrhizobiaceae	28211|Alphaproteobacteria	C	NDH-1 shuttles electrons from NADH, via FMN and iron- sulfur (Fe-S) centers, to quinones in the respiratory chain. The immediate electron acceptor for the enzyme in this species is believed to be ubiquinone. Couples the redox reaction to proton translocation (for every two electrons transferred, four hydrogen ions are translocated across the cytoplasmic membrane), and thus conserves the redox ene…	nuoD	GO:0003674,GO:0003824,GO:0003954,GO:0008150,GO:0008152,GO:0016491,GO:0016651,GO:0016655,GO:0050136,GO:0055114	1.6.5.3	ko:K00333	ko00190,ko01100,map00190,map01100	M00144	R11945	RC00061	ko00000,ko00001,ko00002,ko01000	3.D.1	-	Complex1_49kDa
RA01000791.1	1038862.KB893806_gene3275	3.64e-222	613.0	COG2242@1|root,COG2242@2|Bacteria,1R3Z5@1224|Proteobacteria,2TT0M@28211|Alphaproteobacteria,3JT0E@41294|Bradyrhizobiaceae	28211|Alphaproteobacteria	H	Methyltransferase FkbM domain	MA20_37200	-	-	-	-	-	-	-	-	-	-	Methyltransf_21
RA01000792.1	1038862.KB893806_gene3274	1.93e-145	409.0	COG1905@1|root,COG1905@2|Bacteria,1MWS2@1224|Proteobacteria,2TSEJ@28211|Alphaproteobacteria,3JU8S@41294|Bradyrhizobiaceae	28211|Alphaproteobacteria	C	Thioredoxin-like [2Fe-2S] ferredoxin	nuoE	-	1.6.5.3,1.6.99.3	ko:K00334,ko:K03943	ko00190,ko01100,ko04714,ko04723,ko04932,ko05010,ko05012,ko05016,map00190,map01100,map04714,map04723,map04932,map05010,map05012,map05016	M00143,M00144	R11945	RC00061	ko00000,ko00001,ko00002,ko01000	3.D.1,3.D.1.6	-	2Fe-2S_thioredx
RA01000793.1	224911.27353178	1.84e-36	123.0	2BIRI@1|root,32CZ2@2|Bacteria,1N7JB@1224|Proteobacteria,2UGKF@28211|Alphaproteobacteria,3K122@41294|Bradyrhizobiaceae	28211|Alphaproteobacteria	-	-	-	-	-	-	-	-	-	-	-	-	-	-
RA01000794.1	1304877.KI519399_gene4920	0.0	917.0	COG1894@1|root,COG1894@2|Bacteria,1MV8F@1224|Proteobacteria,2TRAH@28211|Alphaproteobacteria,3JRII@41294|Bradyrhizobiaceae	28211|Alphaproteobacteria	C	NDH-1 shuttles electrons from NADH, via FMN and iron- sulfur (Fe-S) centers, to quinones in the respiratory chain	nuoF	GO:0005575,GO:0005623,GO:0005886,GO:0016020,GO:0044464,GO:0071944	1.6.5.3	ko:K00335	ko00190,ko01100,map00190,map01100	M00144	R11945	RC00061	ko00000,ko00001,ko00002,ko01000	3.D.1	-	Complex1_51K,NADH_4Fe-4S,SLBB
RA01000795.1	318996.AXAZ01000048_gene6806	0.0	1338.0	COG1034@1|root,COG1034@2|Bacteria,1P8MN@1224|Proteobacteria,2TS97@28211|Alphaproteobacteria,3JSCC@41294|Bradyrhizobiaceae	28211|Alphaproteobacteria	C	NADH-quinone oxidoreductase	nuoG	-	1.6.5.3	ko:K00336	ko00190,ko01100,map00190,map01100	M00144	R11945	RC00061	ko00000,ko00001,ko00002,ko01000	3.D.1	-	Fer2_4,Molybdopterin,NADH-G_4Fe-4S_3,NADH_dhqG_C
RA01000796.1	936455.KI421499_gene2352	2.95e-241	664.0	COG1005@1|root,COG1005@2|Bacteria,1MU2R@1224|Proteobacteria,2TS09@28211|Alphaproteobacteria,3JRWX@41294|Bradyrhizobiaceae	28211|Alphaproteobacteria	C	NDH-1 shuttles electrons from NADH, via FMN and iron- sulfur (Fe-S) centers, to quinones in the respiratory chain. The immediate electron acceptor for the enzyme in this species is believed to be ubiquinone. Couples the redox reaction to proton translocation (for every two electrons transferred, four hydrogen ions are translocated across the cytoplasmic membrane), and thus conserves the redox ene…	nuoH	GO:0003674,GO:0003824,GO:0003954,GO:0008150,GO:0008152,GO:0016491,GO:0016651,GO:0016655,GO:0050136,GO:0055114	1.6.5.3	ko:K00337	ko00190,ko01100,map00190,map01100	M00144	R11945	RC00061	ko00000,ko00001,ko00002,ko01000	3.D.1	-	NADHdh
RA01000797.1	1038867.AXAY01000003_gene3062	1.65e-102	298.0	COG1143@1|root,COG1143@2|Bacteria,1MV90@1224|Proteobacteria,2TRFE@28211|Alphaproteobacteria,3JSYS@41294|Bradyrhizobiaceae	28211|Alphaproteobacteria	C	NDH-1 shuttles electrons from NADH, via FMN and iron- sulfur (Fe-S) centers, to quinones in the respiratory chain. The immediate electron acceptor for the enzyme in this species is believed to be ubiquinone. Couples the redox reaction to proton translocation (for every two electrons transferred, four hydrogen ions are translocated across the cytoplasmic membrane), and thus conserves the redox ene…	nuoI	GO:0003674,GO:0003824,GO:0003954,GO:0008150,GO:0008152,GO:0016491,GO:0016651,GO:0016655,GO:0050136,GO:0055114	1.6.5.3,1.6.99.3	ko:K00338,ko:K03941	ko00190,ko01100,ko04714,ko04723,ko04932,ko05010,ko05012,ko05016,map00190,map01100,map04714,map04723,map04932,map05010,map05012,map05016	M00143,M00144	R11945	RC00061	ko00000,ko00001,ko00002,ko01000	3.D.1,3.D.1.6	-	Fer4
RA01000798.1	1304877.KI519399_gene4924	4.24e-133	379.0	COG0839@1|root,COG0839@2|Bacteria,1MWJV@1224|Proteobacteria,2TRB2@28211|Alphaproteobacteria,3JRMX@41294|Bradyrhizobiaceae	28211|Alphaproteobacteria	C	Belongs to the complex I subunit 6 family	nuoJ	GO:0005575,GO:0005623,GO:0005886,GO:0016020,GO:0044464,GO:0071944	1.6.5.3	ko:K00339	ko00190,ko01100,map00190,map01100	M00144	R11945	RC00061	ko00000,ko00001,ko00002,ko01000	3.D.1	-	Oxidored_q3
RA01000799.1	189753.AXAS01000017_gene3022	2.59e-56	176.0	COG0713@1|root,COG0713@2|Bacteria,1RH0S@1224|Proteobacteria,2U93P@28211|Alphaproteobacteria,3JZE4@41294|Bradyrhizobiaceae	28211|Alphaproteobacteria	C	NDH-1 shuttles electrons from NADH, via FMN and iron- sulfur (Fe-S) centers, to quinones in the respiratory chain. The immediate electron acceptor for the enzyme in this species is believed to be ubiquinone. Couples the redox reaction to proton translocation (for every two electrons transferred, four hydrogen ions are translocated across the cytoplasmic membrane), and thus conserves the redox ene…	nuoK	GO:0003674,GO:0003824,GO:0003954,GO:0008150,GO:0008152,GO:0016491,GO:0016651,GO:0016655,GO:0050136,GO:0055114	1.6.5.3	ko:K00340	ko00190,ko01100,map00190,map01100	M00144	R11945	RC00061	ko00000,ko00001,ko00002,ko01000	3.D.1	-	Oxidored_q2
RA01000800.1	443598.AUFA01000003_gene2072	0.0	1305.0	COG1009@1|root,COG1009@2|Bacteria,1MW2M@1224|Proteobacteria,2TQSS@28211|Alphaproteobacteria,3JSBH@41294|Bradyrhizobiaceae	28211|Alphaproteobacteria	CP	NADH-Ubiquinone oxidoreductase (complex I), chain 5 N-terminus	nuoL	-	1.6.5.3	ko:K00341	ko00190,ko01100,map00190,map01100	M00144	R11945	RC00061	ko00000,ko00001,ko00002,ko01000	3.D.1	-	NADH5_C,Proton_antipo_M,Proton_antipo_N
RA01000801.1	1037409.BJ6T_47830	0.0	941.0	COG1008@1|root,COG1008@2|Bacteria,1MV7V@1224|Proteobacteria,2TSNK@28211|Alphaproteobacteria,3JTNA@41294|Bradyrhizobiaceae	28211|Alphaproteobacteria	C	NADH-ubiquinone oxidoreductase chain 4, amino terminus	nuoM	GO:0005575,GO:0005623,GO:0005886,GO:0016020,GO:0044464,GO:0071944	1.6.5.3	ko:K00342	ko00190,ko01100,map00190,map01100	M00144	R11945	RC00061	ko00000,ko00001,ko00002,ko01000	3.D.1	-	Oxidored_q5_N,Proton_antipo_M
RA01000802.1	1126627.BAWE01000005_gene4751	7.88e-306	838.0	COG1007@1|root,COG1007@2|Bacteria,1MV56@1224|Proteobacteria,2TQMX@28211|Alphaproteobacteria,3JSRU@41294|Bradyrhizobiaceae	28211|Alphaproteobacteria	C	NDH-1 shuttles electrons from NADH, via FMN and iron- sulfur (Fe-S) centers, to quinones in the respiratory chain. The immediate electron acceptor for the enzyme in this species is believed to be ubiquinone. Couples the redox reaction to proton translocation (for every two electrons transferred, four hydrogen ions are translocated across the cytoplasmic membrane), and thus conserves the redox ene…	nuoN	-	1.6.5.3	ko:K00343	ko00190,ko01100,map00190,map01100	M00144	R11945	RC00061	ko00000,ko00001,ko00002,ko01000	3.D.1	-	Proton_antipo_M
RA01000803.1	1038862.KB893806_gene3263	4.35e-172	482.0	COG0340@1|root,COG0340@2|Bacteria,1MWCC@1224|Proteobacteria,2TS82@28211|Alphaproteobacteria,3JR9E@41294|Bradyrhizobiaceae	28211|Alphaproteobacteria	H	Biotin protein ligase C terminal domain	birA	-	6.3.4.15	ko:K03524	ko00780,ko01100,map00780,map01100	-	R01074,R05145	RC00043,RC00070,RC00096,RC02896	ko00000,ko00001,ko01000,ko03000	-	-	BPL_C,BPL_LplA_LipB
RA01000804.1	1038862.KB893806_gene3262	0.0	1081.0	COG0595@1|root,COG0595@2|Bacteria,1MUGV@1224|Proteobacteria,2TQTR@28211|Alphaproteobacteria,3JRQE@41294|Bradyrhizobiaceae	28211|Alphaproteobacteria	S	Zn-dependent metallo-hydrolase RNA specificity domain	rnjA	-	-	ko:K12574	ko03018,map03018	-	-	-	ko00000,ko00001,ko01000,ko03019	-	-	Lactamase_B,Lactamase_B_2,RMMBL
RA01000805.1	936455.KI421499_gene2361	1.31e-89	263.0	COG0346@1|root,COG0346@2|Bacteria,1RCYU@1224|Proteobacteria,2U728@28211|Alphaproteobacteria,3JY01@41294|Bradyrhizobiaceae	28211|Alphaproteobacteria	E	Glyoxalase/Bleomycin resistance protein/Dioxygenase superfamily	mce	-	5.1.99.1	ko:K05606	ko00280,ko00630,ko00640,ko00720,ko01100,ko01120,ko01200,map00280,map00630,map00640,map00720,map01100,map01120,map01200	M00373,M00375,M00376,M00741	R02765,R09979	RC00780,RC02739	ko00000,ko00001,ko00002,ko01000	-	-	Glyoxalase_4
RA01000806.1	936455.KI421499_gene2362	7.29e-60	184.0	COG5454@1|root,COG5454@2|Bacteria,1N6T0@1224|Proteobacteria,2UF4C@28211|Alphaproteobacteria,3JZFS@41294|Bradyrhizobiaceae	28211|Alphaproteobacteria	S	Protein of unknown function (DUF1467)	MA20_37275	-	-	-	-	-	-	-	-	-	-	DUF1467
RA01000807.1	1304878.AUGD01000010_gene4622	7.15e-74	221.0	2A7F4@1|root,30WCM@2|Bacteria,1RDNR@1224|Proteobacteria,2U7FD@28211|Alphaproteobacteria,3JYUZ@41294|Bradyrhizobiaceae	28211|Alphaproteobacteria	-	-	MA20_37280	-	-	-	-	-	-	-	-	-	-	-
RA01000808.1	1038867.AXAY01000003_gene3051	9.46e-282	773.0	COG4857@1|root,COG4857@2|Bacteria,1MXBW@1224|Proteobacteria,2TR0Z@28211|Alphaproteobacteria,3JR7F@41294|Bradyrhizobiaceae	28211|Alphaproteobacteria	S	Catalyzes the phosphorylation of methylthioribose into methylthioribose-1-phosphate	mtnK	-	2.7.1.100	ko:K00899	ko00270,ko01100,map00270,map01100	M00034	R04143	RC00002,RC00078	ko00000,ko00001,ko00002,ko01000	-	-	APH
RA01000809.1	443598.AUFA01000003_gene2081	1.19e-164	465.0	COG0021@1|root,COG0021@2|Bacteria,1NPVU@1224|Proteobacteria,2U0TS@28211|Alphaproteobacteria,3JWA3@41294|Bradyrhizobiaceae	28211|Alphaproteobacteria	G	Catalyzes the transfer of a two-carbon ketol group from a ketose donor to an aldose acceptor, via a covalent intermediate with the cofactor thiamine pyrophosphate	-	-	-	-	-	-	-	-	-	-	-	-
RA01000810.1	1037409.BJ6T_47920	0.0	1018.0	COG0747@1|root,COG0747@2|Bacteria,1MUZH@1224|Proteobacteria,2TR1D@28211|Alphaproteobacteria,3JWCD@41294|Bradyrhizobiaceae	28211|Alphaproteobacteria	E	Bacterial extracellular solute-binding proteins, family 5 Middle	-	-	-	ko:K02035	ko02024,map02024	M00239	-	-	ko00000,ko00001,ko00002,ko02000	3.A.1.5	-	SBP_bac_5
RA01000811.1	1038866.KB902791_gene3335	1.79e-195	545.0	COG0601@1|root,COG0601@2|Bacteria,1MU8Z@1224|Proteobacteria,2TR68@28211|Alphaproteobacteria,3JW0P@41294|Bradyrhizobiaceae	28211|Alphaproteobacteria	EP	Binding-protein-dependent transport system inner membrane component	-	-	-	ko:K02033	ko02024,map02024	M00239	-	-	ko00000,ko00001,ko00002,ko02000	3.A.1.5	-	BPD_transp_1
RA01000812.1	1038866.KB902791_gene3336	2.48e-169	476.0	COG1173@1|root,COG1173@2|Bacteria,1MXGS@1224|Proteobacteria,2TTQ7@28211|Alphaproteobacteria,3JVF4@41294|Bradyrhizobiaceae	28211|Alphaproteobacteria	EP	Binding-protein-dependent transport system inner membrane component	-	-	-	ko:K02034	ko02024,map02024	M00239	-	-	ko00000,ko00001,ko00002,ko02000	3.A.1.5	-	BPD_transp_1,OppC_N
RA01000813.1	1038866.KB902791_gene3337	2.11e-224	619.0	COG0444@1|root,COG0444@2|Bacteria,1R4KB@1224|Proteobacteria,2TR0J@28211|Alphaproteobacteria,3JURA@41294|Bradyrhizobiaceae	28211|Alphaproteobacteria	EP	AAA domain, putative AbiEii toxin, Type IV TA system	-	-	-	ko:K02031	ko02024,map02024	M00239	-	-	ko00000,ko00001,ko00002,ko02000	3.A.1.5	-	ABC_tran,oligo_HPY
RA01000814.1	189753.AXAS01000017_gene3037	8.87e-230	635.0	COG4608@1|root,COG4608@2|Bacteria,1NU4K@1224|Proteobacteria,2TQTV@28211|Alphaproteobacteria,3JR82@41294|Bradyrhizobiaceae	28211|Alphaproteobacteria	E	Oligopeptide/dipeptide transporter, C-terminal region	-	-	-	ko:K02032	ko02024,map02024	M00239	-	-	ko00000,ko00001,ko00002,ko02000	3.A.1.5	-	ABC_tran,oligo_HPY
RA01000815.1	318996.AXAZ01000054_gene6404	7.73e-220	609.0	COG1172@1|root,COG1172@2|Bacteria,1MX7D@1224|Proteobacteria,2TYRW@28211|Alphaproteobacteria,3JT84@41294|Bradyrhizobiaceae	28211|Alphaproteobacteria	G	Branched-chain amino acid transport system / permease component	MA20_37370	GO:0003674,GO:0005215,GO:0005575,GO:0005623,GO:0005886,GO:0006810,GO:0008150,GO:0008643,GO:0015144,GO:0015145,GO:0015749,GO:0016020,GO:0016021,GO:0022857,GO:0031224,GO:0034219,GO:0044425,GO:0044464,GO:0051119,GO:0051179,GO:0051234,GO:0055085,GO:0071702,GO:0071944	-	ko:K10440	ko02010,map02010	M00212	-	-	ko00000,ko00001,ko00002,ko02000	3.A.1.2.1,3.A.1.2.13,3.A.1.2.19	-	BPD_transp_2
RA01000816.1	1038867.AXAY01000003_gene3042	0.0	921.0	COG1129@1|root,COG1129@2|Bacteria,1MU22@1224|Proteobacteria,2TQJV@28211|Alphaproteobacteria,3JS9B@41294|Bradyrhizobiaceae	28211|Alphaproteobacteria	G	Function proposed based on presence of conserved amino acid motif, structural feature or limited homology	MA20_37375	-	3.6.3.17	ko:K10441	ko02010,map02010	M00212	-	-	ko00000,ko00001,ko00002,ko01000,ko02000	3.A.1.2.1,3.A.1.2.13,3.A.1.2.19	-	ABC_tran
RA01000817.1	1037409.BJ6T_48140	2.26e-242	666.0	COG1879@1|root,COG1879@2|Bacteria,1NRXG@1224|Proteobacteria,2TW5I@28211|Alphaproteobacteria,3JTWN@41294|Bradyrhizobiaceae	28211|Alphaproteobacteria	G	Periplasmic binding proteins and sugar binding domain of LacI family	MA20_37380	-	-	ko:K10439	ko02010,ko02030,map02010,map02030	M00212	-	-	ko00000,ko00001,ko00002,ko02000	3.A.1.2.1,3.A.1.2.13,3.A.1.2.19	-	Peripla_BP_4
RA01000818.1	319003.Bra1253DRAFT_08391	2.83e-75	226.0	COG1017@1|root,COG1017@2|Bacteria,1REV4@1224|Proteobacteria,2U757@28211|Alphaproteobacteria,3JZ5V@41294|Bradyrhizobiaceae	28211|Alphaproteobacteria	C	nitric oxide dioxygenase activity	-	-	-	-	-	-	-	-	-	-	-	-
RA01000819.1	224911.27353147	3.71e-59	185.0	2A99Z@1|root,30YEV@2|Bacteria,1RIIH@1224|Proteobacteria,2UA9Y@28211|Alphaproteobacteria,3JZKP@41294|Bradyrhizobiaceae	28211|Alphaproteobacteria	S	Protein of unknown function (DUF2946)	-	-	-	-	-	-	-	-	-	-	-	DUF2946
RA01000820.1	1304877.KI519399_gene4946	0.0	1425.0	COG4772@1|root,COG4772@2|Bacteria,1MUIH@1224|Proteobacteria,2TRPJ@28211|Alphaproteobacteria,3JRAT@41294|Bradyrhizobiaceae	28211|Alphaproteobacteria	P	TonB-dependent receptor	-	-	-	ko:K02014	-	-	-	-	ko00000,ko02000	1.B.14	-	Plug,TonB_dep_Rec
RA01000821.1	318996.AXAZ01000054_gene6399	1.75e-272	747.0	COG4409@1|root,COG4409@2|Bacteria,1MVUD@1224|Proteobacteria,2TRQQ@28211|Alphaproteobacteria,3JRHA@41294|Bradyrhizobiaceae	28211|Alphaproteobacteria	G	exo-alpha-(2->6)-sialidase activity	-	-	-	-	-	-	-	-	-	-	-	BNR_2
RA01000822.1	335659.S23_33020	9.56e-107	308.0	COG0526@1|root,COG0526@2|Bacteria,1MZ9B@1224|Proteobacteria,2U6Q1@28211|Alphaproteobacteria,3JZ47@41294|Bradyrhizobiaceae	28211|Alphaproteobacteria	CO	COG0526 Thiol-disulfide isomerase and thioredoxins	MA20_37405	-	-	-	-	-	-	-	-	-	-	Redoxin,Thioredoxin
RA01000823.1	1037409.BJ6T_48200	5.22e-108	312.0	COG2847@1|root,COG2847@2|Bacteria,1MZ3M@1224|Proteobacteria,2UBUR@28211|Alphaproteobacteria,3JX1P@41294|Bradyrhizobiaceae	28211|Alphaproteobacteria	S	Copper chaperone PCu(A)C	-	-	-	ko:K09796	-	-	-	-	ko00000,ko03110	-	-	PCuAC
RA01000824.1	1126627.BAWE01000004_gene4716	2.14e-111	321.0	COG4549@1|root,COG4549@2|Bacteria,1RGDY@1224|Proteobacteria,2VGUA@28211|Alphaproteobacteria,3JRBK@41294|Bradyrhizobiaceae	28211|Alphaproteobacteria	S	Domain of unkown function (DUF1775)	-	-	-	ko:K09796	-	-	-	-	ko00000,ko03110	-	-	DUF1775
RA01000825.1	1037409.BJ6T_48230	2.36e-289	800.0	COG1276@1|root,COG2372@1|root,COG1276@2|Bacteria,COG2372@2|Bacteria,1MXGC@1224|Proteobacteria,2TVGX@28211|Alphaproteobacteria,3JS3T@41294|Bradyrhizobiaceae	28211|Alphaproteobacteria	P	CopC domain	ycnJ	-	-	ko:K07245,ko:K14166	-	-	-	-	ko00000,ko02000	9.B.62.1	-	CopC,CopD
RA01000826.1	1126627.BAWE01000004_gene4714	0.0	877.0	COG0442@1|root,COG0442@2|Bacteria,1MU7E@1224|Proteobacteria,2TQQ4@28211|Alphaproteobacteria,3JUUQ@41294|Bradyrhizobiaceae	28211|Alphaproteobacteria	J	Catalyzes the attachment of proline to tRNA(Pro) in a two-step reaction proline is first activated by ATP to form Pro- AMP and then transferred to the acceptor end of tRNA(Pro)	proS	GO:0005575,GO:0005622,GO:0005623,GO:0005737,GO:0044424,GO:0044464	6.1.1.15	ko:K01881	ko00970,map00970	M00359,M00360	R03661	RC00055,RC00523	ko00000,ko00001,ko00002,ko01000,ko01007,ko03016	-	-	HGTP_anticodon,tRNA-synt_2b
RA01000827.1	1304877.KI519399_gene4951	1.61e-290	795.0	COG4591@1|root,COG4591@2|Bacteria,1MVV7@1224|Proteobacteria,2TRBX@28211|Alphaproteobacteria,3JUG9@41294|Bradyrhizobiaceae	28211|Alphaproteobacteria	M	lipoprotein releasing system, transmembrane protein, LolC E family	lolC	-	-	ko:K09808	ko02010,map02010	M00255	-	-	ko00000,ko00001,ko00002,ko02000	3.A.1.125	-	FtsX,MacB_PCD
RA01000828.1	335659.S23_33090	2.44e-160	450.0	COG1136@1|root,COG1136@2|Bacteria,1MVSQ@1224|Proteobacteria,2TSBE@28211|Alphaproteobacteria,3JT8M@41294|Bradyrhizobiaceae	28211|Alphaproteobacteria	V	Part of the ABC transporter complex LolCDE involved in the translocation of	lolD	GO:0003674,GO:0003824,GO:0005215,GO:0005575,GO:0005623,GO:0005886,GO:0006807,GO:0006810,GO:0008104,GO:0008150,GO:0008152,GO:0015031,GO:0015399,GO:0015405,GO:0015833,GO:0016020,GO:0016021,GO:0016462,GO:0016787,GO:0016817,GO:0016818,GO:0016887,GO:0017111,GO:0019538,GO:0022804,GO:0022857,GO:0031224,GO:0032991,GO:0033036,GO:0042157,GO:0042160,GO:0042623,GO:0042626,GO:0042886,GO:0042953,GO:0043170,GO:…	-	ko:K09810	ko02010,map02010	M00255	-	-	ko00000,ko00001,ko00002,ko01000,ko02000	3.A.1.125	-	ABC_tran
RA01000829.1	1038862.KB893806_gene3235	1.29e-240	663.0	COG0604@1|root,COG0604@2|Bacteria,1QWJV@1224|Proteobacteria,2TX01@28211|Alphaproteobacteria,3JRM5@41294|Bradyrhizobiaceae	28211|Alphaproteobacteria	C	Alcohol dehydrogenase GroES-like domain	-	-	1.1.1.1	ko:K00001	ko00010,ko00071,ko00350,ko00625,ko00626,ko00830,ko00980,ko00982,ko01100,ko01110,ko01120,ko01130,ko01220,map00010,map00071,map00350,map00625,map00626,map00830,map00980,map00982,map01100,map01110,map01120,map01130,map01220	-	R00623,R00754,R02124,R04805,R04880,R05233,R05234,R06917,R06927,R07105,R08281,R08306,R08310	RC00050,RC00087,RC00088,RC00099,RC00116,RC00649,RC01734,RC02273	ko00000,ko00001,ko01000	-	-	ADH_N,ADH_zinc_N
RA01000830.1	1037409.BJ6T_48280	4.49e-179	499.0	COG1396@1|root,COG1396@2|Bacteria,1MUG2@1224|Proteobacteria,2TR3R@28211|Alphaproteobacteria,3JW2Q@41294|Bradyrhizobiaceae	28211|Alphaproteobacteria	K	Helix-turn-helix XRE-family like proteins	-	-	-	-	-	-	-	-	-	-	-	HTH_31
RA01000831.1	318996.AXAZ01000008_gene4198	7.86e-84	248.0	COG1393@1|root,COG1393@2|Bacteria,1MZ4Z@1224|Proteobacteria,2U70U@28211|Alphaproteobacteria,3JYT0@41294|Bradyrhizobiaceae	28211|Alphaproteobacteria	P	ArsC family	arsC	-	1.20.4.1	ko:K00537	-	-	-	-	ko00000,ko01000	-	-	ArsC
RA01000832.1	319003.Bra1253DRAFT_07812	4.2e-148	419.0	COG0580@1|root,COG0580@2|Bacteria,1PPTN@1224|Proteobacteria,2TW8M@28211|Alphaproteobacteria,3JRC9@41294|Bradyrhizobiaceae	28211|Alphaproteobacteria	G	Belongs to the MIP aquaporin (TC 1.A.8) family	aqpZ	-	-	-	-	-	-	-	-	-	-	MIP
RA01000833.1	1038862.KB893884_gene761	1.47e-68	209.0	COG0640@1|root,COG0640@2|Bacteria,1MZAU@1224|Proteobacteria,2U9NV@28211|Alphaproteobacteria,3JZQ9@41294|Bradyrhizobiaceae	28211|Alphaproteobacteria	K	helix_turn_helix, Arsenical Resistance Operon Repressor	-	-	-	ko:K03892	-	-	-	-	ko00000,ko03000	-	-	HTH_20
RA01000834.1	1038867.AXAY01000007_gene5955	8.34e-61	188.0	COG0640@1|root,COG0640@2|Bacteria,1MZAU@1224|Proteobacteria,2UBVH@28211|Alphaproteobacteria,3JZJF@41294|Bradyrhizobiaceae	28211|Alphaproteobacteria	K	helix_turn_helix, Arsenical Resistance Operon Repressor	-	-	-	-	-	-	-	-	-	-	-	HTH_20
RA01000835.1	335659.S23_49120	3.9e-290	796.0	COG0492@1|root,COG0492@2|Bacteria,1MXI0@1224|Proteobacteria,2TUAR@28211|Alphaproteobacteria,3JS4W@41294|Bradyrhizobiaceae	28211|Alphaproteobacteria	O	Pyridine nucleotide-disulphide oxidoreductase	-	-	-	-	-	-	-	-	-	-	-	DAO,NAD_binding_8,Pyr_redox_3
RA01000836.1	1038862.KB893884_gene758	5.96e-219	612.0	COG2223@1|root,COG2223@2|Bacteria,1QW6R@1224|Proteobacteria,2TWQ6@28211|Alphaproteobacteria,3JUKG@41294|Bradyrhizobiaceae	28211|Alphaproteobacteria	P	Major Facilitator Superfamily	-	-	-	-	-	-	-	-	-	-	-	MFS_1
RA01000837.1	224911.27353131	7.92e-149	422.0	COG3637@1|root,COG3637@2|Bacteria,1MWEG@1224|Proteobacteria,2TSCB@28211|Alphaproteobacteria,3JTF0@41294|Bradyrhizobiaceae	28211|Alphaproteobacteria	M	Function proposed based on presence of conserved amino acid motif, structural feature or limited homology	-	-	-	ko:K16079	-	-	-	-	ko00000,ko02000	1.B.4.2.1	-	OMP_b-brl
RA01000838.1	1038862.KB893806_gene3222	9.49e-13	61.2	2AGRZ@1|root,316ZV@2|Bacteria,1NIT3@1224|Proteobacteria,2UJVM@28211|Alphaproteobacteria,3K1SV@41294|Bradyrhizobiaceae	28211|Alphaproteobacteria	-	-	-	-	-	-	-	-	-	-	-	-	-	-
RA01000839.1	443598.AUFA01000003_gene2120	0.0	2227.0	COG0587@1|root,COG0587@2|Bacteria,1MUIF@1224|Proteobacteria,2TSCN@28211|Alphaproteobacteria,3JQY6@41294|Bradyrhizobiaceae	28211|Alphaproteobacteria	L	DNA polymerase	dnaE	GO:0006950,GO:0006974,GO:0007154,GO:0008150,GO:0009432,GO:0009605,GO:0009987,GO:0009991,GO:0031668,GO:0033554,GO:0050896,GO:0051716,GO:0071496	2.7.7.7	ko:K02337	ko00230,ko00240,ko01100,ko03030,ko03430,ko03440,map00230,map00240,map01100,map03030,map03430,map03440	M00260	R00375,R00376,R00377,R00378	RC02795	ko00000,ko00001,ko00002,ko01000,ko03032,ko03400	-	-	DNA_pol3_alpha,HHH_6,PHP,tRNA_anti-codon
RA01000840.1	224911.27353129	1.42e-164	461.0	COG0288@1|root,COG0288@2|Bacteria,1NGFN@1224|Proteobacteria,2TU0G@28211|Alphaproteobacteria,3JSWW@41294|Bradyrhizobiaceae	28211|Alphaproteobacteria	P	Reversible hydration of carbon dioxide	-	-	4.2.1.1	ko:K01673	ko00910,map00910	-	R00132,R10092	RC02807	ko00000,ko00001,ko01000	-	-	Pro_CA
RA01000841.1	936455.KI421499_gene2406	0.0	922.0	COG4249@1|root,COG4249@2|Bacteria,1MUDG@1224|Proteobacteria,2TU22@28211|Alphaproteobacteria,3JT62@41294|Bradyrhizobiaceae	28211|Alphaproteobacteria	NU	peptidase C14 caspase catalytic subunit p20	-	-	-	-	-	-	-	-	-	-	-	Peptidase_C14
RA01000842.1	1304878.AUGD01000010_gene4653	1.7e-237	653.0	COG0052@1|root,COG0052@2|Bacteria,1MU33@1224|Proteobacteria,2TRXE@28211|Alphaproteobacteria,3JQQ3@41294|Bradyrhizobiaceae	28211|Alphaproteobacteria	J	Belongs to the universal ribosomal protein uS2 family	rpsB	GO:0003674,GO:0003735,GO:0005198,GO:0005575,GO:0005622,GO:0005623,GO:0005737,GO:0005829,GO:0005840,GO:0006412,GO:0006518,GO:0006807,GO:0008150,GO:0008152,GO:0009058,GO:0009059,GO:0009987,GO:0010467,GO:0015935,GO:0019538,GO:0022626,GO:0022627,GO:0032991,GO:0034641,GO:0034645,GO:0043043,GO:0043170,GO:0043226,GO:0043228,GO:0043229,GO:0043232,GO:0043603,GO:0043604,GO:0044237,GO:0044238,GO:0044249,GO:…	-	ko:K02967	ko03010,map03010	M00178,M00179	-	-	br01610,ko00000,ko00001,ko00002,ko03011	-	-	Ribosomal_S2
RA01000843.1	224911.27353124	5.84e-201	558.0	COG0264@1|root,COG0264@2|Bacteria,1MUS2@1224|Proteobacteria,2TQM0@28211|Alphaproteobacteria,3JSSW@41294|Bradyrhizobiaceae	28211|Alphaproteobacteria	J	Associates with the EF-Tu.GDP complex and induces the exchange of GDP to GTP. It remains bound to the aminoacyl-tRNA.EF- Tu.GTP complex up to the GTP hydrolysis stage on the ribosome	tsf	GO:0003674,GO:0003676,GO:0003723,GO:0003746,GO:0005488,GO:0006412,GO:0006414,GO:0006518,GO:0006807,GO:0008135,GO:0008150,GO:0008152,GO:0009058,GO:0009059,GO:0009987,GO:0010467,GO:0019538,GO:0034641,GO:0034645,GO:0043043,GO:0043170,GO:0043603,GO:0043604,GO:0044237,GO:0044238,GO:0044249,GO:0044260,GO:0044267,GO:0044271,GO:0071704,GO:0097159,GO:1901363,GO:1901564,GO:1901566,GO:1901576	-	ko:K02357	-	-	-	-	ko00000,ko03012,ko03029	-	-	EF_TS
RA01000844.1	224911.27353123	1.27e-159	449.0	COG0528@1|root,COG0528@2|Bacteria,1MV3N@1224|Proteobacteria,2TQYN@28211|Alphaproteobacteria,3JQN8@41294|Bradyrhizobiaceae	28211|Alphaproteobacteria	F	Catalyzes the reversible phosphorylation of UMP to UDP	pyrH	-	2.7.4.22	ko:K09903	ko00240,ko01100,map00240,map01100	-	R00158	RC00002	ko00000,ko00001,ko01000	-	-	AA_kinase
RA01000845.1	318996.AXAZ01000054_gene6376	1.48e-123	353.0	COG0233@1|root,COG0233@2|Bacteria,1N66T@1224|Proteobacteria,2U5B2@28211|Alphaproteobacteria,3JT3Y@41294|Bradyrhizobiaceae	28211|Alphaproteobacteria	J	Responsible for the release of ribosomes from messenger RNA at the termination of protein biosynthesis. May increase the efficiency of translation by recycling ribosomes from one round of translation to another	frr	GO:0002181,GO:0002184,GO:0003674,GO:0005488,GO:0005575,GO:0005622,GO:0005623,GO:0005737,GO:0006412,GO:0006415,GO:0006518,GO:0006807,GO:0008150,GO:0008152,GO:0009058,GO:0009059,GO:0009987,GO:0010467,GO:0016043,GO:0019538,GO:0022411,GO:0032984,GO:0034641,GO:0034645,GO:0043021,GO:0043023,GO:0043043,GO:0043170,GO:0043603,GO:0043604,GO:0043624,GO:0043933,GO:0044237,GO:0044238,GO:0044249,GO:0044260,GO:…	-	ko:K02838	-	-	-	-	ko00000,ko03012	-	-	RRF
RA01000846.1	1038866.KB902791_gene3375	3.8e-174	486.0	COG0020@1|root,COG0020@2|Bacteria,1MVP1@1224|Proteobacteria,2TTVJ@28211|Alphaproteobacteria,3JTBS@41294|Bradyrhizobiaceae	28211|Alphaproteobacteria	I	Catalyzes the condensation of isopentenyl diphosphate (IPP) with allylic pyrophosphates generating different type of terpenoids	uppS	GO:0002094,GO:0003674,GO:0003824,GO:0004659,GO:0005575,GO:0005622,GO:0005623,GO:0005737,GO:0005829,GO:0006066,GO:0006629,GO:0006720,GO:0008150,GO:0008152,GO:0008299,GO:0008610,GO:0009058,GO:0009987,GO:0016093,GO:0016094,GO:0016740,GO:0016765,GO:0044237,GO:0044238,GO:0044249,GO:0044255,GO:0044281,GO:0044283,GO:0044424,GO:0044444,GO:0044464,GO:0046165,GO:0071704,GO:1901576,GO:1901615,GO:1901617	2.5.1.31	ko:K00806	ko00900,ko01110,map00900,map01110	-	R06447	RC00279,RC02839	ko00000,ko00001,ko01000,ko01006	-	-	Prenyltransf
RA01000847.1	443598.AUFA01000003_gene2128	2.54e-147	421.0	COG0575@1|root,COG0575@2|Bacteria,1MWSV@1224|Proteobacteria,2U9ED@28211|Alphaproteobacteria,3JSVI@41294|Bradyrhizobiaceae	28211|Alphaproteobacteria	I	Belongs to the CDS family	cdsA	-	2.7.7.41	ko:K00981	ko00564,ko01100,ko01110,ko04070,map00564,map01100,map01110,map04070	M00093	R01799	RC00002	ko00000,ko00001,ko00002,ko01000	-	-	CTP_transf_1
RA01000848.1	1304878.AUGD01000010_gene4659	6.68e-275	754.0	COG0743@1|root,COG0743@2|Bacteria,1MU4G@1224|Proteobacteria,2TSD1@28211|Alphaproteobacteria,3JRCU@41294|Bradyrhizobiaceae	28211|Alphaproteobacteria	I	Catalyzes the NADP-dependent rearrangement and reduction of 1-deoxy-D-xylulose-5-phosphate (DXP) to 2-C-methyl-D-erythritol 4-phosphate (MEP)	dxr	GO:0000166,GO:0003674,GO:0003824,GO:0005488,GO:0006081,GO:0006082,GO:0006090,GO:0006629,GO:0006644,GO:0006720,GO:0006721,GO:0006793,GO:0006796,GO:0008150,GO:0008152,GO:0008299,GO:0008610,GO:0008654,GO:0009058,GO:0009240,GO:0009987,GO:0016114,GO:0016491,GO:0016614,GO:0016616,GO:0019288,GO:0019637,GO:0019682,GO:0019752,GO:0030145,GO:0030604,GO:0032787,GO:0036094,GO:0043167,GO:0043168,GO:0043169,GO:…	1.1.1.267	ko:K00099	ko00900,ko01100,ko01110,ko01130,map00900,map01100,map01110,map01130	M00096	R05688	RC01452	ko00000,ko00001,ko00002,ko01000	-	-	DXPR_C,DXP_redisom_C,DXP_reductoisom
RA01000849.1	1037409.BJ6T_48570	2.52e-263	723.0	COG0750@1|root,COG0750@2|Bacteria,1MU91@1224|Proteobacteria,2TQXJ@28211|Alphaproteobacteria,3JSGZ@41294|Bradyrhizobiaceae	28211|Alphaproteobacteria	M	zinc metalloprotease	rseP	-	-	ko:K11749	ko02024,ko04112,map02024,map04112	-	-	-	ko00000,ko00001,ko01000,ko01002	-	-	PDZ_2,Peptidase_M50
RA01000850.1	1304877.KI519399_gene4969	0.0	1552.0	COG4775@1|root,COG4775@2|Bacteria,1MU0D@1224|Proteobacteria,2TR7W@28211|Alphaproteobacteria,3JT8X@41294|Bradyrhizobiaceae	28211|Alphaproteobacteria	M	Part of the outer membrane protein assembly complex, which is involved in assembly and insertion of beta-barrel proteins into the outer membrane	bamA	-	-	ko:K07277	-	-	-	-	ko00000,ko02000,ko03029	1.B.33	-	Bac_surface_Ag,POTRA
RA01000851.1	1304878.AUGD01000010_gene4662	1.46e-202	566.0	COG1044@1|root,COG1044@2|Bacteria,1MUX6@1224|Proteobacteria,2TS8U@28211|Alphaproteobacteria,3JR6V@41294|Bradyrhizobiaceae	28211|Alphaproteobacteria	M	Catalyzes the N-acylation of UDP-3-O-acylglucosamine using 3-hydroxyacyl-ACP as the acyl donor. Is involved in the biosynthesis of lipid A, a phosphorylated glycolipid that anchors the lipopolysaccharide to the outer membrane of the cell	lpxD	-	2.3.1.191	ko:K02536	ko00540,ko01100,map00540,map01100	M00060	R04550	RC00039,RC00166	ko00000,ko00001,ko00002,ko01000,ko01005	-	-	Hexapep,Hexapep_2,LpxD
RA01000852.1	936455.KI421499_gene2417	4.02e-109	313.0	COG0764@1|root,COG0764@2|Bacteria,1RH2T@1224|Proteobacteria,2U7G4@28211|Alphaproteobacteria,3JUYW@41294|Bradyrhizobiaceae	28211|Alphaproteobacteria	I	Involved in unsaturated fatty acids biosynthesis. Catalyzes the dehydration of short chain beta-hydroxyacyl-ACPs and long chain saturated and unsaturated beta-hydroxyacyl-ACPs	fabZ	-	4.2.1.59	ko:K02372	ko00061,ko00780,ko01100,ko01212,map00061,map00780,map01100,map01212	M00083,M00572	R04428,R04535,R04537,R04544,R04568,R04954,R04965,R07764,R10117,R10121	RC00831,RC01095	ko00000,ko00001,ko00002,ko01000,ko01004	-	-	FabA
RA01000853.1	224911.27353114	1.92e-58	182.0	2E9Q0@1|root,333WC@2|Bacteria,1RIQJ@1224|Proteobacteria,2U9SR@28211|Alphaproteobacteria,3JZKY@41294|Bradyrhizobiaceae	28211|Alphaproteobacteria	S	KTSC domain	-	-	-	-	-	-	-	-	-	-	-	KTSC
RA01000854.1	224911.27353113	1.59e-116	341.0	COG1043@1|root,COG1043@2|Bacteria,1MUHQ@1224|Proteobacteria,2TRK9@28211|Alphaproteobacteria,3JRXY@41294|Bradyrhizobiaceae	28211|Alphaproteobacteria	M	Involved in the biosynthesis of lipid A, a phosphorylated glycolipid that anchors the lipopolysaccharide to the outer membrane of the cell	lpxA	-	2.3.1.129	ko:K00677	ko00540,ko01100,ko01503,map00540,map01100,map01503	M00060	R04567	RC00039,RC00055	ko00000,ko00001,ko00002,ko01000,ko01005	-	-	Acetyltransf_11,Hexapep
RA01000855.1	318996.AXAZ01000054_gene6366	1.17e-190	531.0	COG3494@1|root,COG3494@2|Bacteria,1MWTH@1224|Proteobacteria,2U4AB@28211|Alphaproteobacteria,3JRR0@41294|Bradyrhizobiaceae	28211|Alphaproteobacteria	S	Protein of unknown function (DUF1009)	cdsA2	GO:0003674,GO:0003824,GO:0005975,GO:0006629,GO:0006643,GO:0006644,GO:0006664,GO:0006793,GO:0006796,GO:0008150,GO:0008152,GO:0008610,GO:0008654,GO:0008758,GO:0009058,GO:0009245,GO:0009247,GO:0009311,GO:0009312,GO:0009987,GO:0016051,GO:0016462,GO:0016787,GO:0016817,GO:0016818,GO:0019637,GO:0044237,GO:0044238,GO:0044249,GO:0044255,GO:0046467,GO:0046493,GO:0071704,GO:0090407,GO:1901135,GO:1901137,GO:…	-	ko:K09949	-	-	-	-	ko00000	-	-	DUF1009
RA01000856.1	319003.Bra1253DRAFT_08429	1.92e-263	724.0	COG0763@1|root,COG0763@2|Bacteria,1MVBI@1224|Proteobacteria,2TSEA@28211|Alphaproteobacteria,3JUMR@41294|Bradyrhizobiaceae	28211|Alphaproteobacteria	M	Condensation of UDP-2,3-diacylglucosamine and 2,3- diacylglucosamine-1-phosphate to form lipid A disaccharide, a precursor of lipid A, a phosphorylated glycolipid that anchors the lipopolysaccharide to the outer membrane of the cell	lpxB	GO:0003674,GO:0005488,GO:0005543,GO:0005575,GO:0005622,GO:0005623,GO:0005737,GO:0005829,GO:0005975,GO:0006629,GO:0006643,GO:0006644,GO:0006664,GO:0006793,GO:0006796,GO:0008150,GO:0008152,GO:0008289,GO:0008610,GO:0008654,GO:0009058,GO:0009245,GO:0009247,GO:0009311,GO:0009312,GO:0009987,GO:0016051,GO:0019637,GO:0043167,GO:0043168,GO:0044237,GO:0044238,GO:0044249,GO:0044255,GO:0044424,GO:0044444,GO:…	2.4.1.182	ko:K00748	ko00540,ko01100,map00540,map01100	M00060	R04606	RC00005,RC00059	ko00000,ko00001,ko00002,ko01000,ko01003,ko01005	-	GT19	LpxB
RA01000857.1	443598.AUFA01000040_gene6046	6.28e-154	435.0	COG1028@1|root,COG1028@2|Bacteria,1MXTP@1224|Proteobacteria,2TQST@28211|Alphaproteobacteria,3JSE8@41294|Bradyrhizobiaceae	28211|Alphaproteobacteria	IQ	KR domain	-	-	1.1.1.175	ko:K22185	ko00040,map00040	-	R01429	RC00066	ko00000,ko00001,ko01000	-	-	adh_short_C2
RA01000858.1	318996.AXAZ01000032_gene3467	5.38e-251	690.0	COG3842@1|root,COG3842@2|Bacteria,1MU3I@1224|Proteobacteria,2TQQJ@28211|Alphaproteobacteria,3JUD1@41294|Bradyrhizobiaceae	28211|Alphaproteobacteria	P	ATPases associated with a variety of cellular activities	-	-	-	ko:K10112	ko02010,map02010	M00194,M00196,M00197,M00200,M00201,M00206,M00207,M00491,M00602,M00605,M00606	-	-	ko00000,ko00001,ko00002,ko02000	3.A.1.1	-	ABC_tran,TOBE,TOBE_2
RA01000859.1	1037409.BJ6T_48670	3.01e-192	535.0	COG0395@1|root,COG0395@2|Bacteria,1MUT9@1224|Proteobacteria,2TRQ0@28211|Alphaproteobacteria,3JVWY@41294|Bradyrhizobiaceae	28211|Alphaproteobacteria	G	Binding-protein-dependent transport system inner membrane component	MA20_37640	-	-	ko:K17317	ko02010,map02010	M00605	-	-	ko00000,ko00001,ko00002,ko02000	3.A.1.1.24,3.A.1.1.30	-	BPD_transp_1
RA01000860.1	443598.AUFA01000040_gene6049	5.84e-202	561.0	COG1175@1|root,COG1175@2|Bacteria,1MU84@1224|Proteobacteria,2TRM5@28211|Alphaproteobacteria,3JUVD@41294|Bradyrhizobiaceae	28211|Alphaproteobacteria	G	Binding-protein-dependent transport system inner membrane component	-	-	-	ko:K17316	ko02010,map02010	M00605	-	-	ko00000,ko00001,ko00002,ko02000	3.A.1.1.24,3.A.1.1.30	-	BPD_transp_1
RA01000861.1	1037409.BJ6T_48690	6e-287	786.0	COG1653@1|root,COG1653@2|Bacteria,1MUYE@1224|Proteobacteria,2TUCZ@28211|Alphaproteobacteria,3JSQE@41294|Bradyrhizobiaceae	28211|Alphaproteobacteria	G	Bacterial extracellular solute-binding protein	MA20_37650	-	-	ko:K17315	ko02010,map02010	M00605	-	-	ko00000,ko00001,ko00002,ko02000	3.A.1.1.24,3.A.1.1.30	-	SBP_bac_1,SBP_bac_8
RA01000862.1	318996.AXAZ01000032_gene3463	5.09e-253	696.0	COG1940@1|root,COG2512@1|root,COG1940@2|Bacteria,COG2512@2|Bacteria,1PR4Y@1224|Proteobacteria,2U1NB@28211|Alphaproteobacteria,3JVTF@41294|Bradyrhizobiaceae	28211|Alphaproteobacteria	GK	ROK family	-	-	-	-	-	-	-	-	-	-	-	ROK
RA01000863.1	443598.AUFA01000003_gene2137	2.75e-78	237.0	COG0625@1|root,COG0625@2|Bacteria,1REDI@1224|Proteobacteria,2TR9W@28211|Alphaproteobacteria,3JVAC@41294|Bradyrhizobiaceae	28211|Alphaproteobacteria	O	Glutathione S-transferase, C-terminal domain	-	-	2.5.1.18	ko:K00799	ko00480,ko00980,ko00982,ko00983,ko01524,ko05200,ko05204,ko05225,ko05418,map00480,map00980,map00982,map00983,map01524,map05200,map05204,map05225,map05418	-	R03522,R07002,R07003,R07004,R07023,R07024,R07025,R07026,R07069,R07070,R07083,R07084,R07091,R07092,R07093,R07094,R07100,R07113,R07116,R08280,R09409,R11905	RC00004,RC00069,RC00840,RC00948,RC01704,RC01705,RC01706,RC01758,RC01759,RC01765,RC01767,RC01769,RC02243,RC02527,RC02939,RC02940,RC02942,RC02943,RC02944	ko00000,ko00001,ko01000,ko02000	1.A.12.2.2,1.A.12.3.2	-	GST_C,GST_C_2,GST_N,GST_N_3
RA01000864.1	443598.AUFA01000003_gene2137	1.05e-37	131.0	COG0625@1|root,COG0625@2|Bacteria,1REDI@1224|Proteobacteria,2TR9W@28211|Alphaproteobacteria,3JVAC@41294|Bradyrhizobiaceae	28211|Alphaproteobacteria	O	Glutathione S-transferase, C-terminal domain	-	-	2.5.1.18	ko:K00799	ko00480,ko00980,ko00982,ko00983,ko01524,ko05200,ko05204,ko05225,ko05418,map00480,map00980,map00982,map00983,map01524,map05200,map05204,map05225,map05418	-	R03522,R07002,R07003,R07004,R07023,R07024,R07025,R07026,R07069,R07070,R07083,R07084,R07091,R07092,R07093,R07094,R07100,R07113,R07116,R08280,R09409,R11905	RC00004,RC00069,RC00840,RC00948,RC01704,RC01705,RC01706,RC01758,RC01759,RC01765,RC01767,RC01769,RC02243,RC02527,RC02939,RC02940,RC02942,RC02943,RC02944	ko00000,ko00001,ko01000,ko02000	1.A.12.2.2,1.A.12.3.2	-	GST_C,GST_C_2,GST_N,GST_N_3
RA01000865.1	1038862.KB893806_gene3197	1.59e-125	361.0	2BSKV@1|root,32MPE@2|Bacteria,1R9JS@1224|Proteobacteria,2U3ZK@28211|Alphaproteobacteria,3JWY4@41294|Bradyrhizobiaceae	28211|Alphaproteobacteria	-	-	-	-	-	-	-	-	-	-	-	-	-	-
RA01000866.1	1038862.KB893806_gene3196	0.0	867.0	COG0372@1|root,COG0372@2|Bacteria,1MUKX@1224|Proteobacteria,2TS63@28211|Alphaproteobacteria,3JRZW@41294|Bradyrhizobiaceae	28211|Alphaproteobacteria	C	Belongs to the citrate synthase family	gltA	-	2.3.3.1	ko:K01647	ko00020,ko00630,ko01100,ko01110,ko01120,ko01130,ko01200,ko01210,ko01230,map00020,map00630,map01100,map01110,map01120,map01130,map01200,map01210,map01230	M00009,M00010,M00012,M00740	R00351	RC00004,RC00067	br01601,ko00000,ko00001,ko00002,ko01000	-	-	Citrate_synt
RA01000867.1	936455.KI421499_gene2428	0.0	910.0	COG0008@1|root,COG0008@2|Bacteria,1MUCR@1224|Proteobacteria,2TRSU@28211|Alphaproteobacteria,3JS6J@41294|Bradyrhizobiaceae	28211|Alphaproteobacteria	J	Catalyzes the attachment of glutamate to tRNA(Glu) in a two-step reaction glutamate is first activated by ATP to form Glu-AMP and then transferred to the acceptor end of tRNA(Glu)	gltX	-	6.1.1.17	ko:K01885	ko00860,ko00970,ko01100,ko01110,ko01120,map00860,map00970,map01100,map01110,map01120	M00121,M00359,M00360	R05578	RC00055,RC00523	ko00000,ko00001,ko00002,ko01000,ko01007,ko02048,ko03016	-	-	tRNA-synt_1c
RA01000868.1	443598.AUFA01000003_gene2140	1.53e-107	314.0	COG2249@1|root,COG2249@2|Bacteria,1MUHN@1224|Proteobacteria,2U9KV@28211|Alphaproteobacteria,3K6D0@41294|Bradyrhizobiaceae	28211|Alphaproteobacteria	S	Flavodoxin-like fold	-	-	1.6.5.2	ko:K00355	ko00130,ko01110,ko05200,ko05225,ko05418,map00130,map01110,map05200,map05225,map05418	-	R02964,R03643,R03816	RC00819	ko00000,ko00001,ko01000	-	-	Flavodoxin_2
RA01000869.1	1038862.KB893806_gene3193	0.0	1113.0	COG0008@1|root,COG0008@2|Bacteria,1MUC8@1224|Proteobacteria,2TRKX@28211|Alphaproteobacteria,3JUGQ@41294|Bradyrhizobiaceae	28211|Alphaproteobacteria	J	glutaminyl-tRNA synthetase	glnS	-	6.1.1.18	ko:K01886	ko00970,ko01100,map00970,map01100	M00359,M00360	R03652	RC00055,RC00523	ko00000,ko00001,ko00002,ko01000,ko01007,ko03016	-	-	tRNA-synt_1c,tRNA-synt_1c_C
RA01000870.1	1037409.BJ6T_48750	6.83e-71	215.0	COG4319@1|root,COG4319@2|Bacteria,1RE87@1224|Proteobacteria,2U7SI@28211|Alphaproteobacteria,3JZ4N@41294|Bradyrhizobiaceae	28211|Alphaproteobacteria	S	SnoaL-like domain	-	-	-	-	-	-	-	-	-	-	-	DUF4440,SnoaL_3
RA01000871.1	318996.AXAZ01000032_gene3457	4.9e-126	362.0	COG0135@1|root,COG0135@2|Bacteria,1RA5Q@1224|Proteobacteria,2U5E8@28211|Alphaproteobacteria,3K0EV@41294|Bradyrhizobiaceae	28211|Alphaproteobacteria	E	N-(5'phosphoribosyl)anthranilate (PRA) isomerase	-	-	5.3.1.24	ko:K01817	ko00400,ko01100,ko01110,ko01130,ko01230,map00400,map01100,map01110,map01130,map01230	M00023	R03509	RC00945	ko00000,ko00001,ko00002,ko01000	-	-	PRAI
RA01000872.1	296591.Bpro_1408	1.18e-147	417.0	COG5588@1|root,COG5588@2|Bacteria	2|Bacteria	S	Protein of unknown function (DUF1326)	-	-	-	-	-	-	-	-	-	-	-	DUF1326
RA01000873.1	318996.AXAZ01000032_gene3456	1.23e-211	588.0	COG1234@1|root,COG1234@2|Bacteria,1PPRD@1224|Proteobacteria,2U4Q3@28211|Alphaproteobacteria,3JXPI@41294|Bradyrhizobiaceae	28211|Alphaproteobacteria	S	Beta-lactamase superfamily domain	-	-	3.1.26.11	ko:K00784	ko03013,map03013	-	-	-	ko00000,ko00001,ko01000,ko03016	-	-	Lactamase_B_2
RA01000874.1	1040989.AWZU01000030_gene872	1.87e-88	261.0	COG1881@1|root,COG1881@2|Bacteria,1N0Y4@1224|Proteobacteria,2U971@28211|Alphaproteobacteria,3K64H@41294|Bradyrhizobiaceae	28211|Alphaproteobacteria	S	Phosphatidylethanolamine-binding protein	-	-	-	ko:K06910	-	-	-	-	ko00000	-	-	PBP
RA01000875.1	224911.27353099	0.0	942.0	COG0174@1|root,COG0174@2|Bacteria,1MUGQ@1224|Proteobacteria,2TXJ5@28211|Alphaproteobacteria,3JW0D@41294|Bradyrhizobiaceae	28211|Alphaproteobacteria	E	Glutamine synthetase, catalytic domain	-	-	6.3.1.2	ko:K01915	ko00220,ko00250,ko00630,ko00910,ko01100,ko01120,ko01230,ko02020,ko04217,ko04724,ko04727,map00220,map00250,map00630,map00910,map01100,map01120,map01230,map02020,map04217,map04724,map04727	-	R00253	RC00010,RC02798	ko00000,ko00001,ko01000,ko04147	-	-	Gln-synt_C,Gln-synt_N
RA01000876.1	224911.27353098	2.22e-35	120.0	2EJ3S@1|root,33CV1@2|Bacteria,1N8ZT@1224|Proteobacteria,2UFYU@28211|Alphaproteobacteria,3K0VR@41294|Bradyrhizobiaceae	28211|Alphaproteobacteria	-	-	-	-	-	-	-	-	-	-	-	-	-	-
RA01000877.1	1038866.KB902791_gene3398	2.78e-73	220.0	2DMYT@1|root,32UF9@2|Bacteria,1N01P@1224|Proteobacteria,2U7CG@28211|Alphaproteobacteria,3JYX9@41294|Bradyrhizobiaceae	28211|Alphaproteobacteria	S	SPW repeat	-	-	-	-	-	-	-	-	-	-	-	SPW
RA01000878.1	224911.27353096	1.06e-312	852.0	COG0477@1|root,COG0477@2|Bacteria,1MU46@1224|Proteobacteria,2TRAP@28211|Alphaproteobacteria,3JVB7@41294|Bradyrhizobiaceae	28211|Alphaproteobacteria	EGP	Sugar (and other) transporter	-	-	-	-	-	-	-	-	-	-	-	MFS_1,Sugar_tr
RA01000879.1	318996.AXAZ01000032_gene3451	4.32e-48	153.0	COG3798@1|root,COG3798@2|Bacteria,1N2FJ@1224|Proteobacteria,2UC84@28211|Alphaproteobacteria,3K024@41294|Bradyrhizobiaceae	28211|Alphaproteobacteria	S	Uncharacterized protein conserved in bacteria (DUF2171)	MA20_37705	-	-	-	-	-	-	-	-	-	-	DUF2171
RA01000881.1	1037409.BJ6T_48820	1.57e-210	583.0	COG2203@1|root,COG2203@2|Bacteria,1QWV5@1224|Proteobacteria,2TX6E@28211|Alphaproteobacteria,3JXPX@41294|Bradyrhizobiaceae	28211|Alphaproteobacteria	T	Gaf domain	-	-	-	-	-	-	-	-	-	-	-	-
RA01000882.1	936455.KI421499_gene2435	1.88e-94	276.0	2F7IU@1|root,33ZZE@2|Bacteria,1RBQ7@1224|Proteobacteria,2UC36@28211|Alphaproteobacteria,3JZ42@41294|Bradyrhizobiaceae	28211|Alphaproteobacteria	-	-	MA20_37725	-	-	-	-	-	-	-	-	-	-	-
RA01000883.1	319003.Bra1253DRAFT_00459	2.57e-158	444.0	COG1974@1|root,COG1974@2|Bacteria,1MW80@1224|Proteobacteria,2TT7W@28211|Alphaproteobacteria,3JS89@41294|Bradyrhizobiaceae	28211|Alphaproteobacteria	K	Represses a number of genes involved in the response to DNA damage (SOS response), including recA and lexA. In the presence of single-stranded DNA, RecA interacts with LexA causing an autocatalytic cleavage which disrupts the DNA-binding part of LexA, leading to derepression of the SOS regulon and eventually DNA repair	lexA	GO:0000976,GO:0001067,GO:0001130,GO:0001217,GO:0003674,GO:0003676,GO:0003677,GO:0003690,GO:0003700,GO:0005488,GO:0005575,GO:0006355,GO:0006950,GO:0006974,GO:0007154,GO:0008150,GO:0009432,GO:0009605,GO:0009889,GO:0009890,GO:0009891,GO:0009892,GO:0009893,GO:0009987,GO:0009991,GO:0010468,GO:0010556,GO:0010557,GO:0010558,GO:0010604,GO:0010605,GO:0010628,GO:0010629,GO:0019219,GO:0019222,GO:0031323,GO:…	3.4.21.88	ko:K01356	-	M00729	-	-	ko00000,ko00002,ko01000,ko01002,ko03400	-	-	LexA_DNA_bind,Peptidase_S24
RA01000884.1	936455.KI421499_gene2437	7.81e-252	695.0	COG0303@1|root,COG0303@2|Bacteria,1MVD5@1224|Proteobacteria,2TQRI@28211|Alphaproteobacteria,3JRTS@41294|Bradyrhizobiaceae	28211|Alphaproteobacteria	H	MoeA C-terminal region (domain IV)	moeA	GO:0003674,GO:0003824,GO:0005488,GO:0005515,GO:0005575,GO:0005622,GO:0005623,GO:0005737,GO:0005829,GO:0006139,GO:0006163,GO:0006464,GO:0006725,GO:0006732,GO:0006753,GO:0006777,GO:0006793,GO:0006796,GO:0006807,GO:0008150,GO:0008152,GO:0009058,GO:0009108,GO:0009116,GO:0009117,GO:0009119,GO:0009141,GO:0009144,GO:0009150,GO:0009199,GO:0009205,GO:0009259,GO:0009987,GO:0016740,GO:0016772,GO:0016779,GO:…	2.10.1.1	ko:K03750	ko00790,ko01100,map00790,map01100	-	R09735	RC03462	ko00000,ko00001,ko01000	-	-	MoCF_biosynth,MoeA_C,MoeA_N
RA01000886.1	1038862.KB893806_gene3177	8.52e-29	103.0	2AEKS@1|root,314GH@2|Bacteria,1NAAG@1224|Proteobacteria,2UHRS@28211|Alphaproteobacteria,3K113@41294|Bradyrhizobiaceae	28211|Alphaproteobacteria	-	-	-	-	-	-	-	-	-	-	-	-	-	-
RA01000887.1	1126627.BAWE01000004_gene4664	4.17e-140	396.0	COG1011@1|root,COG1011@2|Bacteria,1PGNF@1224|Proteobacteria,2TWR1@28211|Alphaproteobacteria,3JRHW@41294|Bradyrhizobiaceae	28211|Alphaproteobacteria	S	Haloacid dehalogenase-like hydrolase	MA20_37750	-	3.1.3.10	ko:K20866	ko00010,ko01120,map00010,map01120	-	R00947	RC00078	ko00000,ko00001,ko01000	-	-	HAD_2
RA01000888.1	318996.AXAZ01000032_gene3443	6.72e-265	726.0	COG1304@1|root,COG1304@2|Bacteria,1MUEZ@1224|Proteobacteria,2TU4F@28211|Alphaproteobacteria,3JQPK@41294|Bradyrhizobiaceae	28211|Alphaproteobacteria	C	FMN-dependent dehydrogenase	MA20_37755	-	1.1.3.15	ko:K00104	ko00630,ko01100,ko01110,ko01120,ko01130,map00630,map01100,map01110,map01120,map01130	-	R00475	RC00042	ko00000,ko00001,ko01000	-	-	FMN_dh
RA01000889.1	1037409.BJ6T_48900	1.66e-304	832.0	COG0793@1|root,COG0793@2|Bacteria,1MU39@1224|Proteobacteria,2TRW2@28211|Alphaproteobacteria,3JVC7@41294|Bradyrhizobiaceae	28211|Alphaproteobacteria	M	tail specific protease	ctpA	-	3.4.21.102	ko:K03797	-	-	-	-	ko00000,ko01000,ko01002	-	-	PDZ_2,Peptidase_S41
RA01000890.1	936455.KI421499_gene2443	7.18e-158	445.0	COG3967@1|root,COG3967@2|Bacteria,1QSYJ@1224|Proteobacteria,2U29W@28211|Alphaproteobacteria,3JYMF@41294|Bradyrhizobiaceae	28211|Alphaproteobacteria	M	KR domain	-	-	-	ko:K14189	-	-	-	-	ko00000,ko01000	-	-	adh_short
RA01000891.1	288000.BBta_p0110	1.15e-21	87.4	2AFVZ@1|root,315YR@2|Bacteria,1NFT7@1224|Proteobacteria,2UI4E@28211|Alphaproteobacteria,3K13A@41294|Bradyrhizobiaceae	28211|Alphaproteobacteria	-	-	-	-	-	-	-	-	-	-	-	-	-	-
RA01000892.1	224911.27353083	2.16e-254	704.0	COG4645@1|root,COG4645@2|Bacteria,1PI9Q@1224|Proteobacteria,2U1C7@28211|Alphaproteobacteria,3JX14@41294|Bradyrhizobiaceae	28211|Alphaproteobacteria	S	OpgC protein	-	-	-	-	-	-	-	-	-	-	-	OpgC_C
RA01000893.1	224911.27353082	5.02e-75	226.0	COG4828@1|root,COG4828@2|Bacteria,1N984@1224|Proteobacteria,2UBT7@28211|Alphaproteobacteria,3JZ0R@41294|Bradyrhizobiaceae	28211|Alphaproteobacteria	S	Protein of unknown function (DUF1622)	-	-	-	-	-	-	-	-	-	-	-	DUF1622
RA01000894.1	224911.27353081	4.51e-140	402.0	2DNEG@1|root,32X40@2|Bacteria,1R7P4@1224|Proteobacteria,2UCRV@28211|Alphaproteobacteria,3JXAB@41294|Bradyrhizobiaceae	28211|Alphaproteobacteria	S	LTXXQ motif family protein	-	-	-	-	-	-	-	-	-	-	-	LTXXQ
RA01000895.1	224911.27353080	0.0	1008.0	COG1018@1|root,COG1018@2|Bacteria,1MY2Q@1224|Proteobacteria,2U0WY@28211|Alphaproteobacteria,3JVZN@41294|Bradyrhizobiaceae	28211|Alphaproteobacteria	C	Oxidoreductase NAD-binding domain	-	-	-	-	-	-	-	-	-	-	-	FAD_binding_6,Fer2,NAD_binding_1
RA01000896.1	224911.27353079	5.94e-133	380.0	293YE@1|root,2ZRDF@2|Bacteria,1RJA5@1224|Proteobacteria,2TUII@28211|Alphaproteobacteria,3JXV3@41294|Bradyrhizobiaceae	28211|Alphaproteobacteria	-	-	-	-	-	-	-	-	-	-	-	-	-	-
RA01000897.1	272630.MexAM1_META1p1840	6.98e-17	72.4	29T2P@1|root,2ZBY3@2|Bacteria,1QYAR@1224|Proteobacteria,2TXM6@28211|Alphaproteobacteria	28211|Alphaproteobacteria	-	-	-	-	-	-	-	-	-	-	-	-	-	Paired_CXXCH_1
RA01000898.1	1088721.NSU_3024	1.26e-57	187.0	COG1595@1|root,COG1595@2|Bacteria,1RBM4@1224|Proteobacteria,2U5KD@28211|Alphaproteobacteria,2KA5X@204457|Sphingomonadales	204457|Sphingomonadales	K	Belongs to the sigma-70 factor family. ECF subfamily	-	-	-	ko:K03088	-	-	-	-	ko00000,ko03021	-	-	Sigma70_r2,Sigma70_r4_2
RA01000899.1	1037409.BJ6T_48910	0.0	1651.0	COG5001@1|root,COG5001@2|Bacteria,1MU2C@1224|Proteobacteria,2TQS3@28211|Alphaproteobacteria,3JRAF@41294|Bradyrhizobiaceae	28211|Alphaproteobacteria	T	Putative diguanylate phosphodiesterase	-	-	-	-	-	-	-	-	-	-	-	EAL,GGDEF,PAS_4,PAS_7,PAS_8,dCache_1
RA01000900.1	224911.27353076	3.06e-25	94.7	COG3847@1|root,COG3847@2|Bacteria,1NA5Q@1224|Proteobacteria,2UFVH@28211|Alphaproteobacteria,3K0YB@41294|Bradyrhizobiaceae	28211|Alphaproteobacteria	U	Flp/Fap pilin component	-	-	-	ko:K02651	ko04112,map04112	-	-	-	ko00000,ko00001,ko02035,ko02044	-	-	Flp_Fap
RA01000901.1	318996.AXAZ01000032_gene3440	9.77e-108	311.0	COG0315@1|root,COG0315@2|Bacteria,1RCYZ@1224|Proteobacteria,2U747@28211|Alphaproteobacteria,3JR9A@41294|Bradyrhizobiaceae	28211|Alphaproteobacteria	H	Catalyzes the conversion of (8S)-3',8-cyclo-7,8- dihydroguanosine 5'-triphosphate to cyclic pyranopterin monophosphate (cPMP)	moaC	-	4.6.1.17	ko:K03637	ko00790,ko01100,ko04122,map00790,map01100,map04122	-	R11372	RC03425	ko00000,ko00001,ko01000	-	-	MoaC
RA01000902.1	1037409.BJ6T_48980	3.37e-168	473.0	COG0134@1|root,COG0134@2|Bacteria,1MW5K@1224|Proteobacteria,2TSZE@28211|Alphaproteobacteria,3JQR7@41294|Bradyrhizobiaceae	28211|Alphaproteobacteria	E	Belongs to the TrpC family	trpC	GO:0003674,GO:0003824,GO:0004425,GO:0016829,GO:0016830,GO:0016831	4.1.1.48,5.3.1.24	ko:K01609,ko:K13498	ko00400,ko01100,ko01110,ko01130,ko01230,map00400,map01100,map01110,map01130,map01230	M00023	R03508,R03509	RC00944,RC00945	ko00000,ko00001,ko00002,ko01000	-	-	IGPS
RA01000903.1	224911.27353073	1.27e-226	626.0	COG0547@1|root,COG0547@2|Bacteria,1MUPV@1224|Proteobacteria,2TR8S@28211|Alphaproteobacteria,3JVIJ@41294|Bradyrhizobiaceae	28211|Alphaproteobacteria	E	Catalyzes the transfer of the phosphoribosyl group of 5- phosphorylribose-1-pyrophosphate (PRPP) to anthranilate to yield N-(5'-phosphoribosyl)-anthranilate (PRA)	trpD	GO:0000162,GO:0003674,GO:0003824,GO:0004048,GO:0006082,GO:0006520,GO:0006568,GO:0006576,GO:0006586,GO:0006725,GO:0006807,GO:0008150,GO:0008152,GO:0008652,GO:0009058,GO:0009072,GO:0009073,GO:0009308,GO:0009309,GO:0009987,GO:0016053,GO:0016740,GO:0016757,GO:0016763,GO:0018130,GO:0019438,GO:0019752,GO:0034641,GO:0042401,GO:0042430,GO:0042435,GO:0043436,GO:0044106,GO:0044237,GO:0044238,GO:0044249,GO:…	2.4.2.18,4.1.3.27	ko:K00766,ko:K13497	ko00400,ko01100,ko01110,ko01130,ko01230,map00400,map01100,map01110,map01130,map01230	M00023	R00985,R00986,R01073	RC00010,RC00440,RC02148,RC02414	ko00000,ko00001,ko00002,ko01000	-	-	Glycos_trans_3N,Glycos_transf_3
RA01000904.1	224911.27353072	0.0	1067.0	COG0760@1|root,COG0760@2|Bacteria,1MWV0@1224|Proteobacteria,2TRYU@28211|Alphaproteobacteria,3JQRF@41294|Bradyrhizobiaceae	28211|Alphaproteobacteria	O	Peptidylprolyl isomerase	ppiD	-	5.2.1.8	ko:K01802,ko:K03770	-	-	-	-	ko00000,ko01000,ko03110	-	-	Rotamase_2,SurA_N_3
RA01000906.1	335659.S23_33640	9.13e-161	452.0	COG0149@1|root,COG0149@2|Bacteria,1MWK5@1224|Proteobacteria,2TS6I@28211|Alphaproteobacteria,3JRGS@41294|Bradyrhizobiaceae	28211|Alphaproteobacteria	G	Involved in the gluconeogenesis. Catalyzes stereospecifically the conversion of dihydroxyacetone phosphate (DHAP) to D-glyceraldehyde-3-phosphate (G3P)	tpiA	GO:0003674,GO:0003824,GO:0004807,GO:0005575,GO:0005622,GO:0005623,GO:0005737,GO:0005829,GO:0005975,GO:0005996,GO:0006006,GO:0006066,GO:0006071,GO:0006081,GO:0006082,GO:0006090,GO:0006091,GO:0006094,GO:0006096,GO:0006139,GO:0006163,GO:0006164,GO:0006165,GO:0006725,GO:0006732,GO:0006733,GO:0006753,GO:0006754,GO:0006757,GO:0006793,GO:0006796,GO:0006807,GO:0008150,GO:0008152,GO:0009056,GO:0009058,GO:…	5.3.1.1	ko:K01803	ko00010,ko00051,ko00562,ko00710,ko01100,ko01110,ko01120,ko01130,ko01200,ko01230,map00010,map00051,map00562,map00710,map01100,map01110,map01120,map01130,map01200,map01230	M00001,M00002,M00003	R01015	RC00423	ko00000,ko00001,ko00002,ko01000,ko04147	-	-	TIM
RA01000907.1	319003.Bra1253DRAFT_00477	9.39e-78	232.0	COG1314@1|root,COG1314@2|Bacteria,1N8MF@1224|Proteobacteria,2UCIP@28211|Alphaproteobacteria,3JYS8@41294|Bradyrhizobiaceae	28211|Alphaproteobacteria	U	Preprotein translocase SecG subunit	secG	-	-	ko:K03075	ko02024,ko03060,ko03070,map02024,map03060,map03070	M00335	-	-	ko00000,ko00001,ko00002,ko02044	3.A.5.1,3.A.5.2	-	SecG
RA01000908.1	1126627.BAWE01000004_gene4654	0.0	1087.0	COG0504@1|root,COG0504@2|Bacteria,1MUIT@1224|Proteobacteria,2TS4Y@28211|Alphaproteobacteria,3JTRN@41294|Bradyrhizobiaceae	28211|Alphaproteobacteria	F	Catalyzes the ATP-dependent amination of UTP to CTP with either L-glutamine or ammonia as the source of nitrogen. Regulates intracellular CTP levels through interactions with the four ribonucleotide triphosphates	pyrG	-	6.3.4.2	ko:K01937	ko00240,ko01100,map00240,map01100	M00052	R00571,R00573	RC00010,RC00074	ko00000,ko00001,ko00002,ko01000	-	-	CTP_synth_N,GATase
RA01000909.1	1037409.BJ6T_49040	3.61e-140	397.0	COG3963@1|root,COG3963@2|Bacteria,1N1KB@1224|Proteobacteria,2U646@28211|Alphaproteobacteria,3JSCT@41294|Bradyrhizobiaceae	28211|Alphaproteobacteria	I	Ribosomal RNA adenine dimethylase	-	-	-	-	-	-	-	-	-	-	-	RrnaAD
RA01000910.1	318996.AXAZ01000032_gene3432	2.46e-292	802.0	COG0642@1|root,COG2205@2|Bacteria,1N1Z2@1224|Proteobacteria,2TVIP@28211|Alphaproteobacteria,3JSKQ@41294|Bradyrhizobiaceae	28211|Alphaproteobacteria	T	His Kinase A (phosphoacceptor) domain	-	-	-	-	-	-	-	-	-	-	-	HAMP,HATPase_c,HisKA
RA01000911.1	224911.27353066	1.49e-148	419.0	COG0745@1|root,COG0745@2|Bacteria,1NCKY@1224|Proteobacteria,2TRPQ@28211|Alphaproteobacteria,3JRDE@41294|Bradyrhizobiaceae	28211|Alphaproteobacteria	T	Transcriptional regulatory protein, C terminal	-	-	-	ko:K02483	-	-	-	-	ko00000,ko02022	-	-	Response_reg,Trans_reg_C
RA01000912.1	1095769.CAHF01000013_gene3393	1.65e-160	493.0	COG0457@1|root,COG3914@1|root,COG0457@2|Bacteria,COG3914@2|Bacteria,1MVMG@1224|Proteobacteria,2VH3M@28216|Betaproteobacteria,475M3@75682|Oxalobacteraceae	28216|Betaproteobacteria	O	Glycosyl transferase family 41	-	-	-	-	-	-	-	-	-	-	-	Glyco_transf_41,TPR_1,TPR_11,TPR_16,TPR_19,TPR_2,TPR_8
RA01000913.1	1304877.KI519399_gene5054	3.56e-68	206.0	COG5507@1|root,COG5507@2|Bacteria,1RH3Q@1224|Proteobacteria,2U9SM@28211|Alphaproteobacteria,3JYTR@41294|Bradyrhizobiaceae	28211|Alphaproteobacteria	S	NIPSNAP	MA20_41850	-	-	-	-	-	-	-	-	-	-	NIPSNAP
RA01000914.1	224911.27353064	1.54e-188	525.0	COG2877@1|root,COG2877@2|Bacteria,1MV91@1224|Proteobacteria,2TRJX@28211|Alphaproteobacteria,3JUB6@41294|Bradyrhizobiaceae	28211|Alphaproteobacteria	M	3-deoxy-D-manno-octulosonic acid 8-phosphate synthase	kdsA	-	2.5.1.55	ko:K01627	ko00540,ko01100,map00540,map01100	M00063	R03254	RC00435	ko00000,ko00001,ko00002,ko01000,ko01005	-	-	DAHP_synth_1
RA01000915.1	224911.27353063	1.84e-263	724.0	COG0477@1|root,COG2814@2|Bacteria,1R7QS@1224|Proteobacteria,2TUXM@28211|Alphaproteobacteria,3JS25@41294|Bradyrhizobiaceae	28211|Alphaproteobacteria	EGP	Major Facilitator Superfamily	-	-	-	-	-	-	-	-	-	-	-	MFS_1
RA01000916.1	1126627.BAWE01000004_gene4642	5.53e-110	315.0	COG0780@1|root,COG0780@2|Bacteria,1MW0M@1224|Proteobacteria,2U57X@28211|Alphaproteobacteria,3JSS2@41294|Bradyrhizobiaceae	28211|Alphaproteobacteria	S	Catalyzes the NADPH-dependent reduction of 7-cyano-7- deazaguanine (preQ0) to 7-aminomethyl-7-deazaguanine (preQ1)	queF	-	1.7.1.13	ko:K09457	ko00790,ko01100,map00790,map01100	-	R07605	RC01875	ko00000,ko00001,ko01000,ko03016	-	-	QueF
RA01000917.1	224911.27353059	2.32e-137	399.0	COG4257@1|root,COG4257@2|Bacteria,1QR8W@1224|Proteobacteria,2TRQ1@28211|Alphaproteobacteria,3JSJF@41294|Bradyrhizobiaceae	28211|Alphaproteobacteria	V	Inactivates the type B streptogramin antibiotics by linearizing the lactone ring at the ester linkage, generating a free phenylglycine carboxylate and converting the threonyl moiety into 2-amino-butenoic acid	-	-	-	ko:K18235	-	-	-	-	ko00000,ko01000,ko01504	-	-	-
RA01000918.1	1037409.BJ6T_49200	5.94e-301	822.0	COG0148@1|root,COG0148@2|Bacteria,1MU1N@1224|Proteobacteria,2TR04@28211|Alphaproteobacteria,3JQMG@41294|Bradyrhizobiaceae	28211|Alphaproteobacteria	F	Catalyzes the reversible conversion of 2- phosphoglycerate into phosphoenolpyruvate. It is essential for the degradation of carbohydrates via glycolysis	eno	-	4.2.1.11	ko:K01689	ko00010,ko00680,ko01100,ko01110,ko01120,ko01130,ko01200,ko01230,ko03018,ko04066,map00010,map00680,map01100,map01110,map01120,map01130,map01200,map01230,map03018,map04066	M00001,M00002,M00003,M00346,M00394	R00658	RC00349	ko00000,ko00001,ko00002,ko01000,ko03019,ko04147	-	-	Enolase_C,Enolase_N
RA01000919.1	224911.27353055	1.24e-258	710.0	COG0604@1|root,COG0604@2|Bacteria,1MW2V@1224|Proteobacteria,2U07M@28211|Alphaproteobacteria,3JQSM@41294|Bradyrhizobiaceae	28211|Alphaproteobacteria	C	COG0604 NADPH quinone reductase and related Zn-dependent oxidoreductases	-	-	-	-	-	-	-	-	-	-	-	ADH_N,ADH_zinc_N
RA01000920.1	1038862.KB893806_gene3150	1.39e-232	640.0	COG0491@1|root,COG0491@2|Bacteria,1MY6G@1224|Proteobacteria,2TTBX@28211|Alphaproteobacteria,3JS8K@41294|Bradyrhizobiaceae	28211|Alphaproteobacteria	S	Metallo-beta-lactamase superfamily	-	-	-	-	-	-	-	-	-	-	-	Lactamase_B
RA01000921.1	1037409.BJ6T_49230	2.46e-120	344.0	COG0431@1|root,COG0431@2|Bacteria,1RAFI@1224|Proteobacteria,2TUBI@28211|Alphaproteobacteria,3JVXT@41294|Bradyrhizobiaceae	28211|Alphaproteobacteria	S	NADPH-dependent FMN reductase	yieF	-	-	ko:K19784	-	-	-	-	ko00000	-	-	FMN_red
RA01000922.1	319003.Bra1253DRAFT_01590	5.62e-274	751.0	COG1680@1|root,COG1680@2|Bacteria,1MVPR@1224|Proteobacteria,2TRWZ@28211|Alphaproteobacteria,3JTME@41294|Bradyrhizobiaceae	28211|Alphaproteobacteria	V	Beta-lactamase	-	-	-	ko:K18372	ko00640,map00640	-	R10705	RC00460,RC00461	ko00000,ko00001,ko01000	-	-	Beta-lactamase,DUF3471
RA01000923.1	1038866.KB902769_gene1648	0.0	1030.0	COG2072@1|root,COG2072@2|Bacteria,1MUQH@1224|Proteobacteria,2TRG4@28211|Alphaproteobacteria,3JSRW@41294|Bradyrhizobiaceae	28211|Alphaproteobacteria	P	Flavin-binding monooxygenase-like	-	-	1.14.13.226	ko:K18371	ko00640,map00640	-	R10704	RC03250	ko00000,ko00001,ko01000	-	-	FMO-like,Pyr_redox_2,Pyr_redox_3
RA01000924.1	1126627.BAWE01000004_gene4645	1.02e-204	567.0	COG4977@1|root,COG4977@2|Bacteria,1MXZQ@1224|Proteobacteria,2U0GT@28211|Alphaproteobacteria,3JUZN@41294|Bradyrhizobiaceae	28211|Alphaproteobacteria	K	helix_turn_helix, arabinose operon control protein	-	-	-	ko:K07506	-	-	-	-	ko00000,ko03000	-	-	HTH_18,HTH_AraC
RA01000925.1	1037409.BJ6T_49240	2.74e-62	192.0	COG2919@1|root,COG2919@2|Bacteria,1N8WI@1224|Proteobacteria,2UGEU@28211|Alphaproteobacteria,3JZFR@41294|Bradyrhizobiaceae	28211|Alphaproteobacteria	D	Septum formation initiator	MA20_41765	-	-	-	-	-	-	-	-	-	-	DivIC
RA01000926.1	224911.27353049	8.26e-205	569.0	COG3284@1|root,COG3284@2|Bacteria,1MVRZ@1224|Proteobacteria,2TSRW@28211|Alphaproteobacteria,3JRH1@41294|Bradyrhizobiaceae	28211|Alphaproteobacteria	KQ	Bacterial regulatory protein, Fis family	acoR	-	-	ko:K21405	-	-	-	-	ko00000,ko03000	-	-	GAF,HTH_8
RA01000927.1	1549858.MC45_16460	8.24e-143	409.0	COG2207@1|root,COG2207@2|Bacteria,1P1FH@1224|Proteobacteria,2TRGB@28211|Alphaproteobacteria,2K3DK@204457|Sphingomonadales	204457|Sphingomonadales	K	AraC family transcriptional regulator	-	-	-	-	-	-	-	-	-	-	-	AraC_binding,HTH_18
RA01000928.1	1549858.MC45_16455	6.52e-95	280.0	COG3576@1|root,COG3576@2|Bacteria,1MWG9@1224|Proteobacteria,2U557@28211|Alphaproteobacteria,2K42A@204457|Sphingomonadales	204457|Sphingomonadales	S	Pfam:Pyridox_oxidase	-	-	-	ko:K07006	-	-	-	-	ko00000	-	-	Putative_PNPOx
RA01000929.1	1038866.KB902791_gene3447	0.0	1002.0	COG1012@1|root,COG1012@2|Bacteria,1MU1V@1224|Proteobacteria,2TQR1@28211|Alphaproteobacteria,3JRV1@41294|Bradyrhizobiaceae	28211|Alphaproteobacteria	C	Aldehyde dehydrogenase family	aldB	-	-	ko:K00138	ko00010,ko00620,ko01100,ko01110,ko01120,map00010,map00620,map01100,map01110,map01120	-	R00711	RC00047	ko00000,ko00001,ko01000	-	-	Aldedh
RA01000930.1	1038867.AXAY01000003_gene2947	6.73e-303	829.0	COG0584@1|root,COG0584@2|Bacteria,1MVWZ@1224|Proteobacteria,2TV4M@28211|Alphaproteobacteria,3JWR8@41294|Bradyrhizobiaceae	28211|Alphaproteobacteria	C	Glycerophosphoryl diester phosphodiesterase family	-	-	3.1.4.46	ko:K01126	ko00564,map00564	-	R01030,R01470	RC00017,RC00425	ko00000,ko00001,ko01000	-	-	GDPD
RA01000931.1	1038862.KB893806_gene3142	3.58e-239	658.0	COG1071@1|root,COG1071@2|Bacteria,1MU5R@1224|Proteobacteria,2TRSS@28211|Alphaproteobacteria,3JS9V@41294|Bradyrhizobiaceae	28211|Alphaproteobacteria	C	The pyruvate dehydrogenase complex catalyzes the overall conversion of pyruvate to acetyl-CoA and CO(2)	pdhA	-	1.2.4.1	ko:K00161	ko00010,ko00020,ko00620,ko01100,ko01110,ko01120,ko01130,ko01200,ko04066,ko04922,ko05230,map00010,map00020,map00620,map01100,map01110,map01120,map01130,map01200,map04066,map04922,map05230	M00307	R00014,R00209,R01699,R03270	RC00004,RC00027,RC00627,RC02742,RC02744,RC02882	br01601,ko00000,ko00001,ko00002,ko01000	-	-	E1_dh
RA01000932.1	1304878.AUGD01000010_gene4705	2.15e-299	820.0	COG0022@1|root,COG0022@2|Bacteria,1R8KB@1224|Proteobacteria,2TRMR@28211|Alphaproteobacteria,3JQYJ@41294|Bradyrhizobiaceae	28211|Alphaproteobacteria	C	The pyruvate dehydrogenase complex catalyzes the overall conversion of pyruvate to acetyl-CoA and CO(2)	pdhB	-	1.2.4.1	ko:K00162	ko00010,ko00020,ko00620,ko01100,ko01110,ko01120,ko01130,ko01200,ko04066,ko04922,ko05230,map00010,map00020,map00620,map01100,map01110,map01120,map01130,map01200,map04066,map04922,map05230	M00307	R00014,R00209,R01699,R03270	RC00004,RC00027,RC00627,RC02742,RC02744,RC02882	br01601,ko00000,ko00001,ko00002,ko01000	-	-	Biotin_lipoyl,Transket_pyr,Transketolase_C
RA01000933.1	1038866.KB902791_gene3450	3.29e-67	203.0	2EHG6@1|root,33B82@2|Bacteria,1RJAB@1224|Proteobacteria,2U93D@28211|Alphaproteobacteria,3JZHH@41294|Bradyrhizobiaceae	28211|Alphaproteobacteria	S	Domain of unknown function (DUF5076)	MA20_41735	-	-	-	-	-	-	-	-	-	-	DUF5076
RA01000934.1	1038862.KB893806_gene3139	2.85e-103	298.0	COG0590@1|root,COG0590@2|Bacteria,1RE8P@1224|Proteobacteria,2U9DE@28211|Alphaproteobacteria,3JU1R@41294|Bradyrhizobiaceae	28211|Alphaproteobacteria	FJ	MafB19-like deaminase	MA20_41730	-	3.5.4.1	ko:K01485	ko00240,ko00330,ko01100,map00240,map00330,map01100	-	R00974,R01411,R02922	RC00074,RC00514,RC00809	ko00000,ko00001,ko01000	-	-	dCMP_cyt_deam_1
RA01000935.1	318996.AXAZ01000032_gene3410	6.35e-272	750.0	COG0508@1|root,COG0508@2|Bacteria,1MUGY@1224|Proteobacteria,2TRXM@28211|Alphaproteobacteria,3JRK6@41294|Bradyrhizobiaceae	28211|Alphaproteobacteria	C	The pyruvate dehydrogenase complex catalyzes the overall conversion of pyruvate to acetyl-CoA and CO(2)	pdhC	-	1.2.4.1,2.3.1.12	ko:K00162,ko:K00627	ko00010,ko00020,ko00620,ko01100,ko01110,ko01120,ko01130,ko01200,ko04066,ko04922,ko05230,map00010,map00020,map00620,map01100,map01110,map01120,map01130,map01200,map04066,map04922,map05230	M00307	R00014,R00209,R01699,R02569,R03270	RC00004,RC00027,RC00627,RC02742,RC02744,RC02857,RC02882	br01601,ko00000,ko00001,ko00002,ko01000	-	-	2-oxoacid_dh,Biotin_lipoyl,E3_binding
RA01000936.1	318996.AXAZ01000032_gene3409	2.28e-27	100.0	29FA6@1|root,3027U@2|Bacteria,1NBWD@1224|Proteobacteria,2UIQJ@28211|Alphaproteobacteria,3K0VC@41294|Bradyrhizobiaceae	28211|Alphaproteobacteria	-	-	-	-	-	-	-	-	-	-	-	-	-	-
RA01000937.1	224911.27353042	0.0	922.0	COG1249@1|root,COG1249@2|Bacteria,1MU2U@1224|Proteobacteria,2TR8H@28211|Alphaproteobacteria,3JR1F@41294|Bradyrhizobiaceae	28211|Alphaproteobacteria	C	Pyridine nucleotide-disulphide oxidoreductase, dimerisation domain	lpdA	GO:0005575,GO:0005622,GO:0005623,GO:0005737,GO:0044424,GO:0044464	1.8.1.4	ko:K00382	ko00010,ko00020,ko00260,ko00280,ko00620,ko00630,ko00640,ko01100,ko01110,ko01120,ko01130,ko01200,map00010,map00020,map00260,map00280,map00620,map00630,map00640,map01100,map01110,map01120,map01130,map01200	M00009,M00011,M00036,M00307,M00532	R00209,R01221,R01698,R03815,R07618,R08549	RC00004,RC00022,RC00583,RC02742,RC02833,RC02834	br01601,ko00000,ko00001,ko00002,ko01000,ko04147	-	-	Pyr_redox_2,Pyr_redox_dim
RA01000938.1	318996.AXAZ01000032_gene3407	1.6e-299	817.0	COG0498@1|root,COG0498@2|Bacteria,1R7X1@1224|Proteobacteria,2TUR3@28211|Alphaproteobacteria,3JU0E@41294|Bradyrhizobiaceae	28211|Alphaproteobacteria	E	Pyridoxal-phosphate dependent enzyme	MA20_41710	-	4.2.3.1	ko:K01733	ko00260,ko00750,ko01100,ko01110,ko01120,ko01230,map00260,map00750,map01100,map01110,map01120,map01230	M00018	R01466,R05086	RC00017,RC00526	ko00000,ko00001,ko00002,ko01000	-	-	PALP
RA01000939.1	318996.AXAZ01000032_gene3406	4.59e-222	613.0	COG3181@1|root,COG3181@2|Bacteria,1MW18@1224|Proteobacteria,2TSKY@28211|Alphaproteobacteria,3JSS0@41294|Bradyrhizobiaceae	28211|Alphaproteobacteria	S	Tripartite tricarboxylate transporter family receptor	MA20_41705	-	-	-	-	-	-	-	-	-	-	TctC
RA01000940.1	936455.KI421499_gene2484	7.85e-73	220.0	COG4566@1|root,COG4566@2|Bacteria,1MZ8E@1224|Proteobacteria,2UBRR@28211|Alphaproteobacteria,3JZZP@41294|Bradyrhizobiaceae	28211|Alphaproteobacteria	T	Response regulator receiver domain	-	-	-	-	-	-	-	-	-	-	-	Response_reg
RA01000941.1	936455.KI421499_gene2485	4.94e-142	402.0	COG4566@1|root,COG4566@2|Bacteria,1R47Z@1224|Proteobacteria,2TSQS@28211|Alphaproteobacteria,3JQPG@41294|Bradyrhizobiaceae	28211|Alphaproteobacteria	T	helix_turn_helix, Lux Regulon	-	-	-	-	-	-	-	-	-	-	-	GerE,Response_reg
RA01000942.1	1038867.AXAY01000003_gene2936	0.0	1229.0	COG4191@1|root,COG4191@2|Bacteria,1RCM9@1224|Proteobacteria,2TR8X@28211|Alphaproteobacteria,3JRJI@41294|Bradyrhizobiaceae	28211|Alphaproteobacteria	T	Histidine kinase-like ATPases	-	-	-	-	-	-	-	-	-	-	-	DUF4118,HATPase_c,HisKA,PAS_3,PAS_9
RA01000943.1	318996.AXAZ01000032_gene3402	1e-23	90.9	2BMP8@1|root,32G8J@2|Bacteria,1P96I@1224|Proteobacteria,2UWKC@28211|Alphaproteobacteria,3K5PS@41294|Bradyrhizobiaceae	28211|Alphaproteobacteria	-	-	-	-	-	-	-	-	-	-	-	-	-	-
RA01000944.1	189753.AXAS01000010_gene7406	1.02e-75	227.0	28XPM@1|root,2ZJKE@2|Bacteria,1RFMR@1224|Proteobacteria,2U7Z0@28211|Alphaproteobacteria,3JYZD@41294|Bradyrhizobiaceae	28211|Alphaproteobacteria	-	-	-	-	-	-	-	-	-	-	-	-	-	-
RA01000945.1	318996.AXAZ01000032_gene3401	8.56e-37	124.0	2DI6J@1|root,30260@2|Bacteria,1NBK7@1224|Proteobacteria,2UFI0@28211|Alphaproteobacteria,3K1BN@41294|Bradyrhizobiaceae	28211|Alphaproteobacteria	-	-	-	-	-	-	-	-	-	-	-	-	-	-
RA01000946.1	936455.KI421499_gene2488	8.94e-70	211.0	2CK8Y@1|root,2ZYVU@2|Bacteria,1RM65@1224|Proteobacteria,2UBHD@28211|Alphaproteobacteria,3JZRR@41294|Bradyrhizobiaceae	28211|Alphaproteobacteria	-	-	-	-	-	-	-	-	-	-	-	-	-	-
RA01000947.1	318996.AXAZ01000032_gene3399	0.0	1232.0	COG0457@1|root,COG0741@1|root,COG0457@2|Bacteria,COG0741@2|Bacteria,1MV3F@1224|Proteobacteria,2TRDB@28211|Alphaproteobacteria,3JUG1@41294|Bradyrhizobiaceae	28211|Alphaproteobacteria	M	Transglycosylase SLT domain	slt	-	-	ko:K08309	-	-	-	-	ko00000,ko01000,ko01011	-	GH23	SLT
RA01000948.1	1038866.KB902791_gene3463	0.0	987.0	COG2114@1|root,COG3850@1|root,COG2114@2|Bacteria,COG3850@2|Bacteria,1QW6N@1224|Proteobacteria,2TS3S@28211|Alphaproteobacteria,3JS4X@41294|Bradyrhizobiaceae	28211|Alphaproteobacteria	T	Adenylyl- / guanylyl cyclase, catalytic domain	-	-	4.6.1.1	ko:K01768	ko00230,ko02025,ko04113,ko04213,map00230,map02025,map04113,map04213	M00695	R00089,R00434	RC00295	ko00000,ko00001,ko00002,ko01000	-	-	Guanylate_cyc,HAMP
RA01000949.1	1038866.KB902791_gene3464	6.4e-26	96.3	29FP3@1|root,302KQ@2|Bacteria,1NA8Z@1224|Proteobacteria,2UFX4@28211|Alphaproteobacteria,3K0VN@41294|Bradyrhizobiaceae	28211|Alphaproteobacteria	-	-	-	-	-	-	-	-	-	-	-	-	-	-
RA01000950.1	1038866.KB902791_gene3465	6.1e-40	132.0	2A75K@1|root,30W1F@2|Bacteria,1N242@1224|Proteobacteria,2UE2T@28211|Alphaproteobacteria,3K0TF@41294|Bradyrhizobiaceae	28211|Alphaproteobacteria	-	-	-	-	-	-	-	-	-	-	-	-	-	-
RA01000952.1	224911.27353030	0.0	1285.0	COG4206@1|root,COG4206@2|Bacteria,1MW63@1224|Proteobacteria,2TX02@28211|Alphaproteobacteria,3JUXU@41294|Bradyrhizobiaceae	28211|Alphaproteobacteria	H	TonB dependent receptor	-	-	-	ko:K02014	-	-	-	-	ko00000,ko02000	1.B.14	-	Plug,TonB_dep_Rec
RA01000953.1	1037409.BJ6T_49520	3.96e-101	296.0	2ED6T@1|root,3373F@2|Bacteria,1MU1D@1224|Proteobacteria,2U2SX@28211|Alphaproteobacteria,3JSMS@41294|Bradyrhizobiaceae	28211|Alphaproteobacteria	-	-	-	-	-	-	-	-	-	-	-	-	-	-
RA01000954.1	936455.KI421499_gene2494	1.46e-84	250.0	29N28@1|root,308ZZ@2|Bacteria,1RM77@1224|Proteobacteria,2UB1Q@28211|Alphaproteobacteria,3JZF8@41294|Bradyrhizobiaceae	28211|Alphaproteobacteria	-	-	-	-	-	-	-	-	-	-	-	-	-	-
RA01000955.1	1230476.C207_03465	3.1e-22	87.4	2ADH2@1|root,314W5@2|Bacteria,1NBTS@1224|Proteobacteria,2UHVW@28211|Alphaproteobacteria,3K134@41294|Bradyrhizobiaceae	28211|Alphaproteobacteria	-	-	-	-	-	-	-	-	-	-	-	-	-	-
RA01000956.1	1037409.BJ6T_49540	0.0	1139.0	COG0129@1|root,COG0129@2|Bacteria,1MUTQ@1224|Proteobacteria,2TRTQ@28211|Alphaproteobacteria,3JTGH@41294|Bradyrhizobiaceae	28211|Alphaproteobacteria	E	Belongs to the IlvD Edd family	ilvD	GO:0003674,GO:0003824,GO:0004160,GO:0016829,GO:0016835,GO:0016836	4.2.1.9	ko:K01687	ko00290,ko00770,ko01100,ko01110,ko01130,ko01210,ko01230,map00290,map00770,map01100,map01110,map01130,map01210,map01230	M00019,M00570	R01209,R04441,R05070	RC00468,RC01714	ko00000,ko00001,ko00002,ko01000	-	-	ILVD_EDD
RA01000957.1	224911.27353026	3.14e-178	499.0	COG0790@1|root,COG0790@2|Bacteria,1MUGD@1224|Proteobacteria,2TRV0@28211|Alphaproteobacteria,3JQQJ@41294|Bradyrhizobiaceae	28211|Alphaproteobacteria	S	Sel1-like repeats.	exoR	-	-	ko:K07126	-	-	-	-	ko00000	-	-	Sel1
RA01000958.1	224911.27353025	4.45e-195	540.0	COG0708@1|root,COG0708@2|Bacteria,1MVII@1224|Proteobacteria,2TR5J@28211|Alphaproteobacteria,3JRXJ@41294|Bradyrhizobiaceae	28211|Alphaproteobacteria	L	exodeoxyribonuclease III	xth	-	3.1.11.2	ko:K01142	ko03410,map03410	-	-	-	ko00000,ko00001,ko01000,ko03400	-	-	Exo_endo_phos
RA01000959.1	1038862.KB893806_gene3118	0.0	1384.0	COG0642@1|root,COG0784@1|root,COG0784@2|Bacteria,COG2205@2|Bacteria,1NRP8@1224|Proteobacteria,2TX41@28211|Alphaproteobacteria,3JRMY@41294|Bradyrhizobiaceae	28211|Alphaproteobacteria	T	His Kinase A (phosphoacceptor) domain	MA20_41600	-	-	-	-	-	-	-	-	-	-	HATPase_c,HisKA,Hpt,PAS_4,Response_reg
RA01000960.1	1126627.BAWE01000004_gene4611	1.97e-70	212.0	COG0316@1|root,COG0316@2|Bacteria,1RHCW@1224|Proteobacteria,2UBR8@28211|Alphaproteobacteria,3JZKF@41294|Bradyrhizobiaceae	28211|Alphaproteobacteria	S	Belongs to the HesB IscA family	erpA	-	-	ko:K13628,ko:K15724	-	-	-	-	ko00000,ko03016	-	-	Fe-S_biosyn
RA01000961.1	936455.KI421499_gene2500	9.17e-285	778.0	COG0232@1|root,COG0232@2|Bacteria,1MVQ2@1224|Proteobacteria,2TRCD@28211|Alphaproteobacteria,3JT2W@41294|Bradyrhizobiaceae	28211|Alphaproteobacteria	F	Belongs to the dGTPase family. Type 2 subfamily	dgt	GO:0003674,GO:0003824,GO:0006139,GO:0006163,GO:0006195,GO:0006203,GO:0006725,GO:0006753,GO:0006793,GO:0006796,GO:0006807,GO:0008150,GO:0008152,GO:0008832,GO:0009056,GO:0009058,GO:0009117,GO:0009141,GO:0009143,GO:0009144,GO:0009146,GO:0009151,GO:0009155,GO:0009166,GO:0009200,GO:0009204,GO:0009215,GO:0009217,GO:0009262,GO:0009264,GO:0009394,GO:0009987,GO:0016787,GO:0016788,GO:0016793,GO:0018130,GO:…	3.1.5.1	ko:K01129	ko00230,map00230	-	R01856	RC00017	ko00000,ko00001,ko01000	-	-	HD,HD_assoc
RA01000962.1	1037409.BJ6T_49620	0.0	1155.0	COG0018@1|root,COG0018@2|Bacteria,1MU4J@1224|Proteobacteria,2TS3Y@28211|Alphaproteobacteria,3JUHD@41294|Bradyrhizobiaceae	28211|Alphaproteobacteria	J	Arginyl-tRNA synthetase	argS	-	6.1.1.19	ko:K01887	ko00970,map00970	M00359,M00360	R03646	RC00055,RC00523	ko00000,ko00001,ko00002,ko01000,ko01007,ko03016,ko03029	-	-	Arg_tRNA_synt_N,DALR_1,tRNA-synt_1d
RA01000963.1	224911.27353019	1.41e-259	726.0	COG3115@1|root,COG3115@2|Bacteria,1RE0F@1224|Proteobacteria,2TWI2@28211|Alphaproteobacteria,3JTB5@41294|Bradyrhizobiaceae	28211|Alphaproteobacteria	D	Sporulation related domain	-	-	-	-	-	-	-	-	-	-	-	SPOR
RA01000964.1	224911.27353018	3.23e-227	628.0	COG1472@1|root,COG1472@2|Bacteria,1MVAJ@1224|Proteobacteria,2TRJK@28211|Alphaproteobacteria,3JRM6@41294|Bradyrhizobiaceae	28211|Alphaproteobacteria	G	Glycosyl hydrolase family 3 N terminal domain	nagZ	-	3.2.1.21,3.2.1.52	ko:K01207,ko:K05349	ko00460,ko00500,ko00520,ko00531,ko00940,ko01100,ko01110,ko01501,map00460,map00500,map00520,map00531,map00940,map01100,map01110,map01501	M00628	R00022,R00026,R02558,R02887,R02985,R03527,R04949,R04998,R05963,R07809,R07810,R10035,R10039,R10040,R10831	RC00049,RC00059,RC00171,RC00262,RC00397,RC00451,RC00714,RC00746,RC01248	ko00000,ko00001,ko00002,ko01000	-	GH3	Glyco_hydro_3
RA01000965.1	1037409.BJ6T_49650	2.12e-189	527.0	COG1354@1|root,COG1354@2|Bacteria,1MVCN@1224|Proteobacteria,2TS1V@28211|Alphaproteobacteria,3JR69@41294|Bradyrhizobiaceae	28211|Alphaproteobacteria	D	Participates in chromosomal partition during cell division. May act via the formation of a condensin-like complex containing Smc and ScpB that pull DNA away from mid-cell into both cell halves	scpA	-	-	ko:K05896	-	-	-	-	ko00000,ko03036	-	-	SMC_ScpA
RA01000966.1	224911.27353016	1.01e-157	445.0	COG1386@1|root,COG1386@2|Bacteria,1PUA6@1224|Proteobacteria,2TU64@28211|Alphaproteobacteria,3JUGS@41294|Bradyrhizobiaceae	28211|Alphaproteobacteria	D	Participates in chromosomal partition during cell division. May act via the formation of a condensin-like complex containing Smc and ScpA that pull DNA away from mid-cell into both cell halves	scpB	-	-	ko:K06024	-	-	-	-	ko00000,ko03036	-	-	SMC_ScpB
RA01000967.1	319003.Bra1253DRAFT_00528	2.21e-46	149.0	COG1826@1|root,COG1826@2|Bacteria,1NGDP@1224|Proteobacteria,2UFBN@28211|Alphaproteobacteria,3K08F@41294|Bradyrhizobiaceae	28211|Alphaproteobacteria	U	Part of the twin-arginine translocation (Tat) system that transports large folded proteins containing a characteristic twin-arginine motif in their signal peptide across membranes. TatA could form the protein-conducting channel of the Tat system	tatA	GO:0003674,GO:0005215	-	ko:K03116	ko03060,ko03070,map03060,map03070	M00336	-	-	ko00000,ko00001,ko00002,ko02044	2.A.64	-	MttA_Hcf106
RA01000968.1	1038866.KB902777_gene2949	2.81e-94	277.0	COG1826@1|root,COG1826@2|Bacteria,1N73F@1224|Proteobacteria,2UF4Z@28211|Alphaproteobacteria,3JVG6@41294|Bradyrhizobiaceae	28211|Alphaproteobacteria	U	Part of the twin-arginine translocation (Tat) system that transports large folded proteins containing a characteristic twin-arginine motif in their signal peptide across membranes. Together with TatC, TatB is part of a receptor directly interacting with Tat signal peptides. TatB may form an oligomeric binding site that transiently accommodates folded Tat precursor proteins before their translocat…	tatB	GO:0003674,GO:0005215	-	ko:K03117	ko03060,ko03070,map03060,map03070	M00336	-	-	ko00000,ko00001,ko00002,ko02044	2.A.64	-	MttA_Hcf106
RA01000969.1	224911.27353013	2.74e-176	493.0	COG0805@1|root,COG0805@2|Bacteria,1MVAY@1224|Proteobacteria,2TTIX@28211|Alphaproteobacteria,3JRJG@41294|Bradyrhizobiaceae	28211|Alphaproteobacteria	U	Part of the twin-arginine translocation (Tat) system that transports large folded proteins containing a characteristic twin-arginine motif in their signal peptide across membranes. Together with TatB, TatC is part of a receptor directly interacting with Tat signal peptides	tatC	-	-	ko:K03118	ko03060,ko03070,map03060,map03070	M00336	-	-	ko00000,ko00001,ko00002,ko02044	2.A.64	-	TatC
RA01000970.1	318996.AXAZ01000068_gene5231	2.3e-310	847.0	COG0172@1|root,COG0172@2|Bacteria,1MUJF@1224|Proteobacteria,2TR4T@28211|Alphaproteobacteria,3JRG5@41294|Bradyrhizobiaceae	28211|Alphaproteobacteria	J	Catalyzes the attachment of serine to tRNA(Ser). Is also able to aminoacylate tRNA(Sec) with serine, to form the misacylated tRNA L-seryl-tRNA(Sec), which will be further converted into selenocysteinyl-tRNA(Sec)	serS	-	6.1.1.11	ko:K01875	ko00970,map00970	M00359,M00360	R03662,R08218	RC00055,RC00523	ko00000,ko00001,ko00002,ko01000,ko01007,ko03016	-	-	Seryl_tRNA_N,tRNA-synt_2b
RA01000971.1	1304878.AUGD01000022_gene3746	2.56e-67	205.0	2A7C6@1|root,30W92@2|Bacteria,1RDBQ@1224|Proteobacteria,2U763@28211|Alphaproteobacteria,3JYSK@41294|Bradyrhizobiaceae	28211|Alphaproteobacteria	-	-	-	-	-	-	-	-	-	-	-	-	-	-
RA01000972.1	936455.KI421499_gene2511	1.98e-182	507.0	COG0496@1|root,COG0496@2|Bacteria,1MVHE@1224|Proteobacteria,2TQXZ@28211|Alphaproteobacteria,3JR6Q@41294|Bradyrhizobiaceae	28211|Alphaproteobacteria	S	Nucleotidase that shows phosphatase activity on nucleoside 5'-monophosphates	surE	-	3.1.3.5	ko:K03787	ko00230,ko00240,ko00760,ko01100,ko01110,map00230,map00240,map00760,map01100,map01110	-	R00183,R00511,R00963,R01126,R01227,R01569,R01664,R01968,R02088,R02102,R02323,R02719,R03346	RC00017	ko00000,ko00001,ko01000	-	-	SurE
RA01000973.1	1038862.KB893806_gene3104	2.44e-79	236.0	COG0784@1|root,COG0784@2|Bacteria,1N70P@1224|Proteobacteria,2UF5P@28211|Alphaproteobacteria,3JZER@41294|Bradyrhizobiaceae	28211|Alphaproteobacteria	T	Response regulator receiver	MA20_41525	-	-	-	-	-	-	-	-	-	-	Response_reg
RA01000974.1	1304877.KI519399_gene5103	3.38e-141	400.0	COG2518@1|root,COG2518@2|Bacteria,1MXQC@1224|Proteobacteria,2TVCY@28211|Alphaproteobacteria,3JTHI@41294|Bradyrhizobiaceae	28211|Alphaproteobacteria	J	Catalyzes the methyl esterification of L-isoaspartyl residues in peptides and proteins that result from spontaneous decomposition of normal L-aspartyl and L-asparaginyl residues. It plays a role in the repair and or degradation of damaged proteins	pcm	-	2.1.1.77	ko:K00573	-	-	-	-	ko00000,ko01000	-	-	PCMT
RA01000975.1	936455.KI421499_gene2514	2.56e-264	731.0	COG0739@1|root,COG1388@1|root,COG0739@2|Bacteria,COG1388@2|Bacteria,1QV29@1224|Proteobacteria,2TW8Q@28211|Alphaproteobacteria,3JTS0@41294|Bradyrhizobiaceae	28211|Alphaproteobacteria	M	Lysin motif	lysM	-	-	-	-	-	-	-	-	-	-	LysM,Peptidase_M23
RA01000976.1	1038862.KB893806_gene3097	5.55e-206	573.0	COG2607@1|root,COG2607@2|Bacteria,1MVMX@1224|Proteobacteria,2TTFE@28211|Alphaproteobacteria,3JRQI@41294|Bradyrhizobiaceae	28211|Alphaproteobacteria	S	Protein of unknown function (DUF815)	MA20_41470	-	-	ko:K06923	-	-	-	-	ko00000	-	-	DUF815
RA01000977.1	1038862.KB893806_gene3096	1.48e-73	221.0	COG1862@1|root,COG1862@2|Bacteria,1MZT2@1224|Proteobacteria,2UBZ6@28211|Alphaproteobacteria,3JYU5@41294|Bradyrhizobiaceae	28211|Alphaproteobacteria	U	Preprotein translocase subunit	yajC	-	-	ko:K03210	ko02024,ko03060,ko03070,map02024,map03060,map03070	M00335	-	-	ko00000,ko00001,ko00002,ko02044	3.A.5.1,3.A.5.2	-	YajC
RA01000978.1	1037409.BJ6T_49850	0.0	999.0	COG0342@1|root,COG0342@2|Bacteria,1MV5U@1224|Proteobacteria,2TQYG@28211|Alphaproteobacteria,3JSE2@41294|Bradyrhizobiaceae	28211|Alphaproteobacteria	U	Part of the Sec protein translocase complex. Interacts with the SecYEG preprotein conducting channel. SecDF uses the proton motive force (PMF) to complete protein translocation after the ATP-dependent function of SecA	secD	-	-	ko:K03072,ko:K12257	ko02024,ko03060,ko03070,map02024,map03060,map03070	M00335	-	-	ko00000,ko00001,ko00002,ko02044	2.A.6.4,3.A.5.2,3.A.5.7	-	SecD_SecF,Sec_GG
RA01000979.1	1038866.KB902777_gene2960	5.52e-222	614.0	COG0341@1|root,COG0341@2|Bacteria,1MU74@1224|Proteobacteria,2TSFW@28211|Alphaproteobacteria,3JUBX@41294|Bradyrhizobiaceae	28211|Alphaproteobacteria	U	Part of the Sec protein translocase complex. Interacts with the SecYEG preprotein conducting channel. SecDF uses the proton motive force (PMF) to complete protein translocation after the ATP-dependent function of SecA	secF	-	-	ko:K03072,ko:K03074	ko03060,ko03070,map03060,map03070	M00335	-	-	ko00000,ko00001,ko00002,ko02044	2.A.6.4,3.A.5.2,3.A.5.7	-	SecD_SecF,Sec_GG
RA01000980.1	1038862.KB893806_gene3093	4.32e-87	256.0	COG3737@1|root,COG3737@2|Bacteria,1N083@1224|Proteobacteria,2U95K@28211|Alphaproteobacteria,3JYVC@41294|Bradyrhizobiaceae	28211|Alphaproteobacteria	S	Protein of unknown function (DUF498/DUF598)	MA20_41450	-	-	-	-	-	-	-	-	-	-	DUF498
RA01000981.1	224911.27352996	4.38e-186	519.0	COG1562@1|root,COG1562@2|Bacteria,1MX4W@1224|Proteobacteria,2U08T@28211|Alphaproteobacteria,3JR6N@41294|Bradyrhizobiaceae	28211|Alphaproteobacteria	I	Squalene/phytoene synthase	crtB	-	2.5.1.32,2.5.1.99	ko:K02291,ko:K18163	ko00906,ko01062,ko01100,ko01110,ko04714,map00906,map01062,map01100,map01110,map04714	M00097	R02065,R04218,R07270,R10177	RC00362,RC01101,RC02869	ko00000,ko00001,ko00002,ko01000,ko01006,ko03029	-	-	SQS_PSY
RA01000982.1	224911.27352995	4.98e-277	759.0	COG1171@1|root,COG1171@2|Bacteria,1MVWJ@1224|Proteobacteria,2TQN9@28211|Alphaproteobacteria,3JVM1@41294|Bradyrhizobiaceae	28211|Alphaproteobacteria	E	Pyridoxal-phosphate dependent enzyme	MA20_41440	-	4.3.1.19	ko:K01754	ko00260,ko00290,ko01100,ko01110,ko01130,ko01200,ko01230,map00260,map00290,map01100,map01110,map01130,map01200,map01230	M00570	R00220,R00996	RC00418,RC02600	ko00000,ko00001,ko00002,ko01000	-	-	ACT,ACT_4,PALP
RA01000983.1	335659.S23_34300	2.03e-255	703.0	COG0520@1|root,COG0520@2|Bacteria,1MX5B@1224|Proteobacteria,2TVGK@28211|Alphaproteobacteria,3JTGG@41294|Bradyrhizobiaceae	28211|Alphaproteobacteria	E	Aminotransferase class-V	-	-	-	-	-	-	-	-	-	-	-	Aminotran_5
RA01000984.1	1037409.BJ6T_49950	4.47e-108	311.0	COG3865@1|root,COG3865@2|Bacteria,1N7IY@1224|Proteobacteria,2U993@28211|Alphaproteobacteria,3JRSK@41294|Bradyrhizobiaceae	28211|Alphaproteobacteria	S	3-demethylubiquinone-9 3-methyltransferase	-	-	2.1.1.222,2.1.1.64	ko:K00568	ko00130,ko01100,ko01110,map00130,map01100,map01110	M00117	R04988,R05614,R08769,R08781	RC00003,RC00392,RC01895	ko00000,ko00001,ko00002,ko01000	-	-	3-dmu-9_3-mt
RA01000985.1	1038862.KB893806_gene3089	1.82e-117	337.0	COG2340@1|root,COG2340@2|Bacteria,1MXPQ@1224|Proteobacteria,2V4H6@28211|Alphaproteobacteria,3JWQG@41294|Bradyrhizobiaceae	28211|Alphaproteobacteria	S	Cysteine-rich secretory protein family	MA20_41405	-	-	-	-	-	-	-	-	-	-	CAP
RA01000986.1	1038862.KB893806_gene3088	2.06e-257	706.0	COG0318@1|root,COG2112@1|root,COG0318@2|Bacteria,COG2112@2|Bacteria,1R4X2@1224|Proteobacteria,2TQVY@28211|Alphaproteobacteria,3JU2U@41294|Bradyrhizobiaceae	28211|Alphaproteobacteria	IQT	serine threonine protein kinase	MA20_41400	-	-	-	-	-	-	-	-	-	-	AMP-binding_C
RA01000987.1	936455.KI421499_gene2535	0.0	921.0	COG1206@1|root,COG1206@2|Bacteria,1MWNQ@1224|Proteobacteria,2TR6M@28211|Alphaproteobacteria,3JSPG@41294|Bradyrhizobiaceae	28211|Alphaproteobacteria	J	Catalyzes the folate-dependent formation of 5-methyl- uridine at position 54 (M-5-U54) in all tRNAs	trmFO	GO:0000166,GO:0001510,GO:0002097,GO:0002098,GO:0003674,GO:0005488,GO:0005575,GO:0005622,GO:0005623,GO:0005737,GO:0005829,GO:0006139,GO:0006396,GO:0006399,GO:0006400,GO:0006725,GO:0006807,GO:0008033,GO:0008150,GO:0008152,GO:0009451,GO:0009987,GO:0010467,GO:0016070,GO:0030488,GO:0032259,GO:0034470,GO:0034641,GO:0034660,GO:0036094,GO:0043167,GO:0043168,GO:0043170,GO:0043412,GO:0043414,GO:0044237,GO:…	2.1.1.74	ko:K04094	-	-	-	-	ko00000,ko01000,ko03016,ko03036	-	-	GIDA
RA01000988.1	1037409.BJ6T_49990	1.3e-26	97.4	COG5457@1|root,COG5457@2|Bacteria,1N809@1224|Proteobacteria,2UF7P@28211|Alphaproteobacteria,3K150@41294|Bradyrhizobiaceae	28211|Alphaproteobacteria	S	Domain of unknown function (DUF1127)	-	-	-	-	-	-	-	-	-	-	-	DUF1127
RA01000989.1	1037409.BJ6T_50000	1.13e-45	149.0	2AERP@1|root,314NE@2|Bacteria,1NAY6@1224|Proteobacteria,2UFAT@28211|Alphaproteobacteria,3K18C@41294|Bradyrhizobiaceae	28211|Alphaproteobacteria	-	-	-	-	-	-	-	-	-	-	-	-	-	-
RA01000990.1	936455.KI421499_gene2538	1.44e-189	527.0	COG2951@1|root,COG2951@2|Bacteria,1MVY0@1224|Proteobacteria,2TTVI@28211|Alphaproteobacteria,3JSD1@41294|Bradyrhizobiaceae	28211|Alphaproteobacteria	M	Transglycosylase SLT domain	MA20_41385	-	-	-	-	-	-	-	-	-	-	SLT_2
RA01000991.1	1037409.BJ6T_50020	3.05e-205	569.0	COG5473@1|root,COG5473@2|Bacteria,1MVRU@1224|Proteobacteria,2TRUD@28211|Alphaproteobacteria,3JT5T@41294|Bradyrhizobiaceae	28211|Alphaproteobacteria	S	Predicted integral membrane protein (DUF2189)	MA20_41380	-	-	-	-	-	-	-	-	-	-	DUF2189
RA01000992.1	936455.KI421499_gene2540	1.48e-59	186.0	2C8DW@1|root,32RKY@2|Bacteria,1MZUD@1224|Proteobacteria,2UCNB@28211|Alphaproteobacteria,3JZ38@41294|Bradyrhizobiaceae	28211|Alphaproteobacteria	S	Domain of unknown function (DUF3597)	MA20_41375	-	-	-	-	-	-	-	-	-	-	DUF3597
RA01000993.1	224911.27352985	3.35e-56	175.0	COG2388@1|root,COG2388@2|Bacteria,1N8AQ@1224|Proteobacteria,2UFVS@28211|Alphaproteobacteria,3JZRZ@41294|Bradyrhizobiaceae	28211|Alphaproteobacteria	S	GCN5-related N-acetyl-transferase	-	-	-	ko:K06975	-	-	-	-	ko00000	-	-	Acetyltransf_CG
RA01000994.1	224911.27352982	1.88e-79	239.0	2DMYT@1|root,32UF9@2|Bacteria,1REV0@1224|Proteobacteria,2U8Z0@28211|Alphaproteobacteria,3K0D4@41294|Bradyrhizobiaceae	28211|Alphaproteobacteria	S	SPW repeat	-	-	-	-	-	-	-	-	-	-	-	SPW
RA01000995.1	1038866.KB902777_gene2979	1.13e-67	206.0	2A91E@1|root,30Y5C@2|Bacteria,1RHXR@1224|Proteobacteria,2U9N5@28211|Alphaproteobacteria,3JZVH@41294|Bradyrhizobiaceae	28211|Alphaproteobacteria	-	-	-	-	-	-	-	-	-	-	-	-	-	-
RA01000996.1	936455.KI421499_gene2547	4.06e-108	312.0	2EKA8@1|root,33E0H@2|Bacteria,1NM44@1224|Proteobacteria,2U4G7@28211|Alphaproteobacteria,3JTYD@41294|Bradyrhizobiaceae	28211|Alphaproteobacteria	-	-	-	-	-	-	-	-	-	-	-	-	-	-
RA01000997.1	318996.AXAZ01000068_gene5259	0.0	1049.0	COG0318@1|root,COG0318@2|Bacteria,1MU6G@1224|Proteobacteria,2TR2W@28211|Alphaproteobacteria,3JR7R@41294|Bradyrhizobiaceae	28211|Alphaproteobacteria	IQ	AMP-binding enzyme C-terminal domain	MA20_41335	-	-	ko:K00666	-	-	-	-	ko00000,ko01000,ko01004	-	-	AMP-binding,AMP-binding_C
RA01000998.1	1037409.BJ6T_50130	1.16e-185	518.0	COG1661@1|root,COG1661@2|Bacteria,1MW02@1224|Proteobacteria,2TTGQ@28211|Alphaproteobacteria,3JUYE@41294|Bradyrhizobiaceae	28211|Alphaproteobacteria	S	Domain of unknown function (DUF296)	-	-	-	-	-	-	-	-	-	-	-	DUF296
RA01000999.1	335659.S23_34460	0.0	1161.0	28NHY@1|root,2ZBJH@2|Bacteria,1RAWQ@1224|Proteobacteria,2TYJH@28211|Alphaproteobacteria,3JRB9@41294|Bradyrhizobiaceae	28211|Alphaproteobacteria	S	Protein of unknown function (DUF1217)	-	-	-	-	-	-	-	-	-	-	-	DUF1217
RA01001000.1	1037409.BJ6T_50150	7.72e-180	501.0	COG3910@1|root,COG3910@2|Bacteria,1MZSY@1224|Proteobacteria,2TRH5@28211|Alphaproteobacteria,3JUGH@41294|Bradyrhizobiaceae	28211|Alphaproteobacteria	S	AAA domain	-	-	-	-	-	-	-	-	-	-	-	AAA_21,AAA_23
RA01001002.1	1126627.BAWE01000004_gene4570	3.58e-115	332.0	COG3832@1|root,COG3832@2|Bacteria,1RD9A@1224|Proteobacteria,2U76G@28211|Alphaproteobacteria,3JT7B@41294|Bradyrhizobiaceae	28211|Alphaproteobacteria	S	Polyketide cyclase / dehydrase and lipid transport	-	-	-	-	-	-	-	-	-	-	-	Polyketide_cyc2
RA01001003.1	319003.Bra1253DRAFT_00561	1.81e-47	169.0	COG3391@1|root,COG3391@2|Bacteria,1MXJJ@1224|Proteobacteria,2TTH6@28211|Alphaproteobacteria,3JUP4@41294|Bradyrhizobiaceae	28211|Alphaproteobacteria	S	Cytochrome D1 heme domain	-	-	-	-	-	-	-	-	-	-	-	Cytochrom_D1,Lactonase,NHL
RA01001004.1	319003.Bra1253DRAFT_00562	1.52e-126	363.0	COG0546@1|root,COG0546@2|Bacteria,1R6SG@1224|Proteobacteria,2TUUY@28211|Alphaproteobacteria,3JU9A@41294|Bradyrhizobiaceae	28211|Alphaproteobacteria	S	haloacid dehalogenase-like hydrolase	-	-	3.1.3.18	ko:K01091	ko00630,ko01100,ko01110,ko01130,map00630,map01100,map01110,map01130	-	R01334	RC00017	ko00000,ko00001,ko01000	-	-	HAD_2
RA01001005.1	319003.Bra1253DRAFT_00563	3.68e-119	342.0	COG2318@1|root,COG2318@2|Bacteria,1R974@1224|Proteobacteria,2U4ZA@28211|Alphaproteobacteria,3JQW4@41294|Bradyrhizobiaceae	28211|Alphaproteobacteria	S	DinB family	-	-	-	-	-	-	-	-	-	-	-	DinB
RA01001006.1	1126627.BAWE01000004_gene4566	0.0	1941.0	COG0178@1|root,COG0178@2|Bacteria,1MW0W@1224|Proteobacteria,2TQK9@28211|Alphaproteobacteria,3JTF6@41294|Bradyrhizobiaceae	28211|Alphaproteobacteria	L	The UvrABC repair system catalyzes the recognition and processing of DNA lesions. UvrA is an ATPase and a DNA-binding protein. A damage recognition complex composed of 2 UvrA and 2 UvrB subunits scans DNA for abnormalities. When the presence of a lesion has been verified by UvrB, the UvrA molecules dissociate	uvrA	-	-	ko:K03701	ko03420,map03420	-	-	-	ko00000,ko00001,ko03400	-	-	ABC_tran
RA01001007.1	335659.S23_34530	2.47e-161	454.0	COG3637@1|root,COG3637@2|Bacteria,1NQ0C@1224|Proteobacteria,2U2VS@28211|Alphaproteobacteria,3JW81@41294|Bradyrhizobiaceae	28211|Alphaproteobacteria	M	Outer membrane protein beta-barrel domain	-	-	-	ko:K16079	-	-	-	-	ko00000,ko02000	1.B.4.2.1	-	OMP_b-brl
RA01001008.1	224911.27352964	2.3e-159	447.0	COG3637@1|root,COG3637@2|Bacteria,1NJWW@1224|Proteobacteria,2UD8G@28211|Alphaproteobacteria,3JWFZ@41294|Bradyrhizobiaceae	28211|Alphaproteobacteria	M	Outer membrane protein beta-barrel domain	-	-	-	ko:K16079	-	-	-	-	ko00000,ko02000	1.B.4.2.1	-	OMP_b-brl
RA01001009.1	224911.27352963	2.2e-160	452.0	COG3637@1|root,COG3637@2|Bacteria,1MWEG@1224|Proteobacteria,2TSCB@28211|Alphaproteobacteria,3JTF0@41294|Bradyrhizobiaceae	28211|Alphaproteobacteria	M	Function proposed based on presence of conserved amino acid motif, structural feature or limited homology	-	-	-	ko:K16079	-	-	-	-	ko00000,ko02000	1.B.4.2.1	-	OMP_b-brl
RA01001010.1	443598.AUFA01000003_gene2281	4.23e-84	251.0	COG0629@1|root,COG0629@2|Bacteria,1RCWT@1224|Proteobacteria,2U5BZ@28211|Alphaproteobacteria,3JRSD@41294|Bradyrhizobiaceae	28211|Alphaproteobacteria	L	Plays an important role in DNA replication, recombination and repair. Binds to ssDNA and to an array of partner proteins to recruit them to their sites of action during DNA metabolism	ssb	GO:0006950,GO:0006974,GO:0007154,GO:0008150,GO:0009432,GO:0009605,GO:0009987,GO:0009991,GO:0031668,GO:0033554,GO:0050896,GO:0051716,GO:0071496	-	ko:K03111	ko03030,ko03430,ko03440,map03030,map03430,map03440	-	-	-	ko00000,ko00001,ko03029,ko03032,ko03400	-	-	SSB
RA01001011.1	936455.KI421499_gene2562	0.0	1729.0	COG0188@1|root,COG0188@2|Bacteria,1MUGG@1224|Proteobacteria,2TSPQ@28211|Alphaproteobacteria,3JSSS@41294|Bradyrhizobiaceae	28211|Alphaproteobacteria	L	A type II topoisomerase that negatively supercoils closed circular double-stranded (ds) DNA in an ATP-dependent manner to modulate DNA topology and maintain chromosomes in an underwound state. Negative supercoiling favors strand separation, and DNA replication, transcription, recombination and repair, all of which involve strand separation. Also able to catalyze the interconversion of other topol…	gyrA	-	5.99.1.3	ko:K02469	-	-	-	-	ko00000,ko01000,ko03032,ko03400	-	-	DNA_gyraseA_C,DNA_topoisoIV
RA01001012.1	1038862.KB893806_gene3056	0.0	1134.0	COG3158@1|root,COG3158@2|Bacteria,1MUVH@1224|Proteobacteria,2TRVJ@28211|Alphaproteobacteria,3JTDY@41294|Bradyrhizobiaceae	28211|Alphaproteobacteria	P	Transport of potassium into the cell	kup3	GO:0003674,GO:0005215,GO:0005575,GO:0006810,GO:0006811,GO:0006812,GO:0006813,GO:0008150,GO:0008324,GO:0009987,GO:0015075,GO:0015077,GO:0015079,GO:0015318,GO:0015672,GO:0016020,GO:0022857,GO:0022890,GO:0030001,GO:0034220,GO:0046873,GO:0051179,GO:0051234,GO:0055085,GO:0071804,GO:0071805,GO:0098655,GO:0098660,GO:0098662	-	ko:K03549	-	-	-	-	ko00000,ko02000	2.A.72	-	K_trans
RA01001013.1	1038862.KB893806_gene3055	3.11e-47	152.0	2B8MF@1|root,321WS@2|Bacteria,1N4A0@1224|Proteobacteria,2UCWJ@28211|Alphaproteobacteria,3K02W@41294|Bradyrhizobiaceae	28211|Alphaproteobacteria	-	-	-	-	-	-	-	-	-	-	-	-	-	-
RA01001014.1	1304877.KI519399_gene5138	2.86e-110	317.0	COG0669@1|root,COG0669@2|Bacteria,1RD9F@1224|Proteobacteria,2U74H@28211|Alphaproteobacteria,3JV4W@41294|Bradyrhizobiaceae	28211|Alphaproteobacteria	F	Reversibly transfers an adenylyl group from ATP to 4'- phosphopantetheine, yielding dephospho-CoA (dPCoA) and pyrophosphate	coaD	-	2.7.7.3	ko:K00954	ko00770,ko01100,map00770,map01100	M00120	R03035	RC00002	ko00000,ko00001,ko00002,ko01000	-	-	CTP_transf_like
RA01001015.1	1038866.KB902777_gene2998	1.04e-123	353.0	COG0652@1|root,COG0652@2|Bacteria,1R9ZQ@1224|Proteobacteria,2U591@28211|Alphaproteobacteria,3JSVU@41294|Bradyrhizobiaceae	28211|Alphaproteobacteria	M	PPIases accelerate the folding of proteins. It catalyzes the cis-trans isomerization of proline imidic peptide bonds in oligopeptides	ppiA	-	5.2.1.8	ko:K01802,ko:K03767,ko:K03768,ko:K09565	ko01503,ko04020,ko04022,ko04217,ko05012,ko05016,ko05145,map01503,map04020,map04022,map04217,map05012,map05016,map05145	-	-	-	ko00000,ko00001,ko01000,ko03110,ko04147	-	-	Pro_isomerase
RA01001016.1	318996.AXAZ01000049_gene5153	4.9e-86	254.0	2E5B6@1|root,3303A@2|Bacteria,1RDY2@1224|Proteobacteria,2TVMZ@28211|Alphaproteobacteria,3JY82@41294|Bradyrhizobiaceae	28211|Alphaproteobacteria	-	-	-	-	-	-	-	-	-	-	-	-	-	-
RA01001017.1	1038862.KB893806_gene3051	2.51e-108	311.0	COG0652@1|root,COG0652@2|Bacteria,1R9ZQ@1224|Proteobacteria,2U591@28211|Alphaproteobacteria,3JR75@41294|Bradyrhizobiaceae	28211|Alphaproteobacteria	O	PPIases accelerate the folding of proteins. It catalyzes the cis-trans isomerization of proline imidic peptide bonds in oligopeptides	ppiB	-	5.2.1.8	ko:K01802,ko:K09565	ko04020,ko04022,ko05012,ko05016,ko05145,map04020,map04022,map05012,map05016,map05145	-	-	-	ko00000,ko00001,ko01000,ko03110	-	-	Pro_isomerase
RA01001018.1	314230.DSM3645_18431	2.3e-36	131.0	COG4859@1|root,COG4859@2|Bacteria,2J14B@203682|Planctomycetes	203682|Planctomycetes	S	Protein of unknown function (DUF2185)	-	-	-	-	-	-	-	-	-	-	-	DUF2185
RA01001019.1	1126627.BAWE01000004_gene4554	1.12e-242	668.0	COG0809@1|root,COG0809@2|Bacteria,1MUH3@1224|Proteobacteria,2TS0D@28211|Alphaproteobacteria,3JUTD@41294|Bradyrhizobiaceae	28211|Alphaproteobacteria	J	Transfers and isomerizes the ribose moiety from AdoMet to the 7-aminomethyl group of 7-deazaguanine (preQ1-tRNA) to give epoxyqueuosine (oQ-tRNA)	queA	GO:0002097,GO:0002099,GO:0003674,GO:0003824,GO:0006139,GO:0006396,GO:0006399,GO:0006400,GO:0006725,GO:0006807,GO:0008033,GO:0008150,GO:0008152,GO:0008616,GO:0009058,GO:0009116,GO:0009119,GO:0009163,GO:0009451,GO:0009987,GO:0010467,GO:0016070,GO:0016740,GO:0016853,GO:0018130,GO:0019438,GO:0034404,GO:0034470,GO:0034641,GO:0034654,GO:0034660,GO:0042455,GO:0043170,GO:0043412,GO:0044237,GO:0044238,GO:…	2.4.99.17	ko:K07568	-	-	-	-	ko00000,ko01000,ko03016	-	-	Queuosine_synth
RA01001020.1	224911.27352951	8.39e-236	650.0	COG0136@1|root,COG0136@2|Bacteria,1MUHG@1224|Proteobacteria,2TSRD@28211|Alphaproteobacteria,3JV4V@41294|Bradyrhizobiaceae	28211|Alphaproteobacteria	E	Catalyzes the NADPH-dependent formation of L-aspartate- semialdehyde (L-ASA) by the reductive dephosphorylation of L- aspartyl-4-phosphate	asd	-	1.2.1.11	ko:K00133	ko00260,ko00261,ko00270,ko00300,ko01100,ko01110,ko01120,ko01130,ko01210,ko01230,map00260,map00261,map00270,map00300,map01100,map01110,map01120,map01130,map01210,map01230	M00016,M00017,M00018,M00033,M00525,M00526,M00527	R02291	RC00684	ko00000,ko00001,ko00002,ko01000	-	-	Semialdhyde_dh,Semialdhyde_dhC
RA01001021.1	318996.AXAZ01000049_gene5157	1.36e-119	345.0	COG3212@1|root,COG3212@2|Bacteria,1R5HE@1224|Proteobacteria,2U2SB@28211|Alphaproteobacteria,3JU3I@41294|Bradyrhizobiaceae	28211|Alphaproteobacteria	S	Peptidase propeptide and YPEB domain	-	-	-	-	-	-	-	-	-	-	-	PepSY
RA01001022.1	224911.27352949	4.61e-157	445.0	COG1309@1|root,COG1309@2|Bacteria,1QTG5@1224|Proteobacteria,2U294@28211|Alphaproteobacteria,3JS56@41294|Bradyrhizobiaceae	28211|Alphaproteobacteria	K	Bacterial regulatory proteins, tetR family	MA20_41190	-	-	-	-	-	-	-	-	-	-	TetR_C_7,TetR_N
RA01001023.1	936455.KI421499_gene2573	1.18e-255	703.0	COG1752@1|root,COG1752@2|Bacteria,1NT1Q@1224|Proteobacteria,2TRM3@28211|Alphaproteobacteria,3JRE2@41294|Bradyrhizobiaceae	28211|Alphaproteobacteria	S	Patatin-like phospholipase	MA20_41185	-	-	-	-	-	-	-	-	-	-	Patatin
RA01001024.1	1038867.AXAY01000032_gene4380	1.26e-269	738.0	COG0343@1|root,COG0343@2|Bacteria,1MUCA@1224|Proteobacteria,2TR87@28211|Alphaproteobacteria,3JRZH@41294|Bradyrhizobiaceae	28211|Alphaproteobacteria	J	Catalyzes the base-exchange of a guanine (G) residue with the queuine precursor 7-aminomethyl-7-deazaguanine (PreQ1) at position 34 (anticodon wobble position) in tRNAs with GU(N) anticodons (tRNA-Asp, -Asn, -His and -Tyr). Catalysis occurs through a double-displacement mechanism. The nucleophile active site attacks the C1' of nucleotide 34 to detach the guanine base from the RNA, forming a coval…	tgt	-	2.4.2.29	ko:K00773	-	-	R03789,R10209	RC00063	ko00000,ko01000,ko03016	-	-	TGT
RA01001025.1	1037409.BJ6T_50420	1.63e-43	141.0	29U58@1|root,30FEV@2|Bacteria,1NJV0@1224|Proteobacteria,2UK2Z@28211|Alphaproteobacteria,3K1QT@41294|Bradyrhizobiaceae	28211|Alphaproteobacteria	-	-	MA20_41175	-	-	-	-	-	-	-	-	-	-	-
RA01001026.1	1037409.BJ6T_50430	2.97e-219	606.0	COG0031@1|root,COG0031@2|Bacteria,1MUBE@1224|Proteobacteria,2TS33@28211|Alphaproteobacteria,3JQMM@41294|Bradyrhizobiaceae	28211|Alphaproteobacteria	E	Belongs to the cysteine synthase cystathionine beta- synthase family	cysK	-	2.5.1.47	ko:K01738	ko00270,ko00920,ko01100,ko01110,ko01120,ko01130,ko01200,ko01230,map00270,map00920,map01100,map01110,map01120,map01130,map01200,map01230	M00021	R00897,R03601,R04859	RC00020,RC02814,RC02821	ko00000,ko00001,ko00002,ko01000	-	-	PALP
RA01001027.1	189753.AXAS01000060_gene8349	4.98e-48	153.0	COG3514@1|root,COG3514@2|Bacteria,1MZPR@1224|Proteobacteria,2UCYI@28211|Alphaproteobacteria,3K08A@41294|Bradyrhizobiaceae	28211|Alphaproteobacteria	S	BrnA antitoxin of type II toxin-antitoxin system	-	-	-	-	-	-	-	-	-	-	-	BrnA_antitoxin
RA01001028.1	224911.27352944	3.51e-289	798.0	COG3409@1|root,COG4249@1|root,COG3409@2|Bacteria,COG4249@2|Bacteria,1MXFD@1224|Proteobacteria,2TR94@28211|Alphaproteobacteria,3JSZC@41294|Bradyrhizobiaceae	28211|Alphaproteobacteria	M	Caspase domain	MA20_41130	-	-	-	-	-	-	-	-	-	-	PG_binding_1,Peptidase_C14
RA01001029.1	224911.27352943	3.93e-191	532.0	COG0697@1|root,COG0697@2|Bacteria,1MV7Y@1224|Proteobacteria,2TUVM@28211|Alphaproteobacteria,3JV2F@41294|Bradyrhizobiaceae	28211|Alphaproteobacteria	EG	EamA-like transporter family	-	-	-	-	-	-	-	-	-	-	-	EamA
RA01001030.1	1037409.BJ6T_50530	2.62e-91	267.0	COG0251@1|root,COG0251@2|Bacteria,1RHSP@1224|Proteobacteria,2U5IT@28211|Alphaproteobacteria,3JY85@41294|Bradyrhizobiaceae	28211|Alphaproteobacteria	J	Endoribonuclease L-PSP	MA20_41120	-	-	-	-	-	-	-	-	-	-	Ribonuc_L-PSP
RA01001031.1	335659.S23_34790	8.17e-109	315.0	2C2M3@1|root,316DE@2|Bacteria,1NJKQ@1224|Proteobacteria,2U28W@28211|Alphaproteobacteria,3JWHZ@41294|Bradyrhizobiaceae	28211|Alphaproteobacteria	-	-	-	-	-	-	-	-	-	-	-	-	-	-
RA01001032.1	335659.S23_34800	5.08e-74	222.0	2A867@1|root,30X73@2|Bacteria,1RFQK@1224|Proteobacteria,2U8Y8@28211|Alphaproteobacteria,3JZAF@41294|Bradyrhizobiaceae	28211|Alphaproteobacteria	-	-	-	-	-	-	-	-	-	-	-	-	-	-
RA01001033.1	224911.27352940	1.03e-127	364.0	COG0223@1|root,COG0223@2|Bacteria,1Q7FH@1224|Proteobacteria,2TT9S@28211|Alphaproteobacteria,3JTMQ@41294|Bradyrhizobiaceae	28211|Alphaproteobacteria	J	Formyl transferase	MA20_41110	-	2.1.2.9	ko:K00604	ko00670,ko00970,map00670,map00970	-	R03940	RC00026,RC00165	ko00000,ko00001,ko01000	-	-	Formyl_trans_N
RA01001034.1	319003.Bra1253DRAFT_00591	5.74e-37	125.0	29CDP@1|root,2ZZC5@2|Bacteria,1MZW8@1224|Proteobacteria,2UED7@28211|Alphaproteobacteria,3K0CP@41294|Bradyrhizobiaceae	28211|Alphaproteobacteria	-	-	-	-	-	-	-	-	-	-	-	-	-	-
RA01001035.1	318996.AXAZ01000049_gene5172	1.77e-62	191.0	29BDM@1|root,2ZYBZ@2|Bacteria,1RJQI@1224|Proteobacteria,2U974@28211|Alphaproteobacteria,3JZTE@41294|Bradyrhizobiaceae	28211|Alphaproteobacteria	-	-	MA20_41095	-	-	-	-	-	-	-	-	-	-	-
RA01001036.1	936455.KI421499_gene2588	5.36e-50	158.0	2ADGV@1|root,31370@2|Bacteria,1N5TW@1224|Proteobacteria,2UBUN@28211|Alphaproteobacteria,3K09G@41294|Bradyrhizobiaceae	28211|Alphaproteobacteria	-	-	-	-	-	-	-	-	-	-	-	-	-	-
RA01001037.1	1038862.KB893806_gene3025	1.17e-236	655.0	COG0628@1|root,COG0628@2|Bacteria,1MVX7@1224|Proteobacteria,2TVGG@28211|Alphaproteobacteria,3JSIB@41294|Bradyrhizobiaceae	28211|Alphaproteobacteria	S	AI-2E family transporter	MA20_41055	-	-	-	-	-	-	-	-	-	-	AI-2E_transport
RA01001038.1	936455.KI421499_gene2591	1.39e-64	198.0	COG1051@1|root,COG1051@2|Bacteria,1RE3N@1224|Proteobacteria,2U8EW@28211|Alphaproteobacteria,3JZ5H@41294|Bradyrhizobiaceae	28211|Alphaproteobacteria	F	NUDIX domain	MA20_41050	-	-	-	-	-	-	-	-	-	-	NUDIX
RA01001039.1	936455.KI421499_gene2592	7.18e-23	89.7	2A6ZV@1|root,30VV0@2|Bacteria,1N1YQ@1224|Proteobacteria,2UBYK@28211|Alphaproteobacteria,3K0JA@41294|Bradyrhizobiaceae	28211|Alphaproteobacteria	-	-	-	-	-	-	-	-	-	-	-	-	-	-
RA01001040.1	1038866.KB902777_gene3024	8.66e-40	132.0	2ACDT@1|root,311Z7@2|Bacteria,1N2KY@1224|Proteobacteria,2UCYC@28211|Alphaproteobacteria,3K041@41294|Bradyrhizobiaceae	28211|Alphaproteobacteria	-	-	-	-	-	-	-	-	-	-	-	-	-	-
RA01001041.1	318996.AXAZ01000049_gene5179	3.2e-93	279.0	2A63G@1|root,30UVX@2|Bacteria,1R5S3@1224|Proteobacteria,2U0FM@28211|Alphaproteobacteria,3JVXJ@41294|Bradyrhizobiaceae	28211|Alphaproteobacteria	-	-	-	-	-	-	-	-	-	-	-	-	-	-
RA01001042.1	318996.AXAZ01000049_gene5181	4.68e-21	83.6	2AH9M@1|root,317JS@2|Bacteria,1NK0X@1224|Proteobacteria,2UKYK@28211|Alphaproteobacteria,3K1ZV@41294|Bradyrhizobiaceae	28211|Alphaproteobacteria	-	-	-	-	-	-	-	-	-	-	-	-	-	-
RA01001043.1	189753.AXAS01000014_gene5575	1.63e-22	90.1	2AITW@1|root,319AY@2|Bacteria,1N4RI@1224|Proteobacteria,2UG88@28211|Alphaproteobacteria,3K111@41294|Bradyrhizobiaceae	28211|Alphaproteobacteria	S	Protein of unknown function (DUF3551)	-	-	-	-	-	-	-	-	-	-	-	DUF3551
RA01001045.1	189753.AXAS01000014_gene5575	1.52e-23	92.8	2AITW@1|root,319AY@2|Bacteria,1N4RI@1224|Proteobacteria,2UG88@28211|Alphaproteobacteria,3K111@41294|Bradyrhizobiaceae	28211|Alphaproteobacteria	S	Protein of unknown function (DUF3551)	-	-	-	-	-	-	-	-	-	-	-	DUF3551
RA01001046.1	196490.AUEZ01000004_gene3889	3.01e-264	728.0	COG0582@1|root,COG0582@2|Bacteria,1MU23@1224|Proteobacteria,2U05W@28211|Alphaproteobacteria,3JV47@41294|Bradyrhizobiaceae	28211|Alphaproteobacteria	L	Belongs to the 'phage' integrase family	-	-	-	-	-	-	-	-	-	-	-	Arm-DNA-bind_3,Phage_integrase
RA01001051.1	196490.AUEZ01000004_gene3893	6.82e-249	701.0	COG3598@1|root,COG3598@2|Bacteria,1R4GJ@1224|Proteobacteria,2TUNT@28211|Alphaproteobacteria,3K03G@41294|Bradyrhizobiaceae	28211|Alphaproteobacteria	L	TOPRIM	-	-	-	-	-	-	-	-	-	-	-	AAA_25
RA01001052.1	394.NGR_c11330	2.58e-18	82.0	2DTAB@1|root,33JEU@2|Bacteria,1NNYR@1224|Proteobacteria,2UKBA@28211|Alphaproteobacteria,4BG36@82115|Rhizobiaceae	28211|Alphaproteobacteria	-	-	-	-	-	-	-	-	-	-	-	-	-	-
RA01001056.1	652103.Rpdx1_2535	4.31e-65	226.0	2DQ9V@1|root,335IH@2|Bacteria	2|Bacteria	-	-	-	-	-	ko:K21449	-	-	-	-	ko00000,ko02000	1.B.40.2	-	-
RA01001058.1	1304877.KI519400_gene444	8.85e-16	72.8	2BMNG@1|root,32G7Q@2|Bacteria,1NPZF@1224|Proteobacteria,2UN5C@28211|Alphaproteobacteria,3K29M@41294|Bradyrhizobiaceae	28211|Alphaproteobacteria	-	-	-	-	-	-	-	-	-	-	-	-	-	-
RA01001062.1	196490.AUEZ01000004_gene3894	2.9e-205	581.0	COG1783@1|root,COG4373@1|root,COG1783@2|Bacteria,COG4373@2|Bacteria,1Q1RY@1224|Proteobacteria,2V9ED@28211|Alphaproteobacteria,3K5IV@41294|Bradyrhizobiaceae	28211|Alphaproteobacteria	S	Mu-like prophage FluMu protein gp28	-	-	-	-	-	-	-	-	-	-	-	-
RA01001065.1	1005058.UMN179_02147	1.63e-09	65.5	COG1349@1|root,COG3177@1|root,COG1349@2|Bacteria,COG3177@2|Bacteria,1MV69@1224|Proteobacteria,1RM9J@1236|Gammaproteobacteria,1Y7VD@135625|Pasteurellales	135625|Pasteurellales	K	Fic/DOC family	Z012_01130	-	-	-	-	-	-	-	-	-	-	Fic,HTH_DeoR
RA01001069.1	1126627.BAWE01000005_gene4923	0.0	875.0	COG0745@1|root,COG2199@1|root,COG0745@2|Bacteria,COG3706@2|Bacteria,1R7HC@1224|Proteobacteria,2TQQM@28211|Alphaproteobacteria,3JRN7@41294|Bradyrhizobiaceae	28211|Alphaproteobacteria	T	Response regulator receiver	pleD	GO:0003674,GO:0005488,GO:0005515,GO:0005575,GO:0005622,GO:0005623,GO:0005737,GO:0042802,GO:0044424,GO:0044464	2.7.7.65	ko:K02488	ko02020,ko04112,map02020,map04112	M00511	R08057	-	ko00000,ko00001,ko00002,ko01000,ko02022	-	-	GGDEF,Response_reg
RA01001070.1	1037409.BJ6T_45800	2.61e-81	241.0	COG0784@1|root,COG0784@2|Bacteria,1QU3I@1224|Proteobacteria,2TVXW@28211|Alphaproteobacteria,3JY06@41294|Bradyrhizobiaceae	28211|Alphaproteobacteria	T	Response regulator receiver domain	divK	-	-	ko:K11443	ko02020,ko04112,map02020,map04112	M00511	-	-	ko00000,ko00001,ko00002,ko02022	-	-	Response_reg
RA01001071.1	936455.KI421499_gene2154	6.82e-66	200.0	2DMKE@1|root,32S6E@2|Bacteria,1N0IU@1224|Proteobacteria,2UC7Q@28211|Alphaproteobacteria,3JZCK@41294|Bradyrhizobiaceae	28211|Alphaproteobacteria	S	Protein of unknown function (DUF3572)	MA20_36230	-	-	-	-	-	-	-	-	-	-	DUF3572
RA01001072.1	318996.AXAZ01000019_gene1724	4.3e-294	804.0	COG0389@1|root,COG0389@2|Bacteria,1MUUH@1224|Proteobacteria,2TSJN@28211|Alphaproteobacteria,3JU40@41294|Bradyrhizobiaceae	28211|Alphaproteobacteria	L	Poorly processive, error-prone DNA polymerase involved in untargeted mutagenesis. Copies undamaged DNA at stalled replication forks, which arise in vivo from mismatched or misaligned primer ends. These misaligned primers can be extended by PolIV. Exhibits no 3'-5' exonuclease (proofreading) activity. May be involved in translesional synthesis, in conjunction with the beta clamp from PolIII	dinB	GO:0006950,GO:0006974,GO:0007154,GO:0008150,GO:0009432,GO:0009605,GO:0009987,GO:0009991,GO:0031668,GO:0033554,GO:0050896,GO:0051716,GO:0071496	2.7.7.7	ko:K02346	-	-	-	-	ko00000,ko01000,ko03400	-	-	IMS,IMS_C
RA01001073.1	1038860.AXAP01000037_gene3200	7.87e-92	271.0	COG5186@1|root,COG5186@2|Bacteria,1QZZZ@1224|Proteobacteria,2TYHC@28211|Alphaproteobacteria,3K6XB@41294|Bradyrhizobiaceae	28211|Alphaproteobacteria	A	Domain of unknown function (DUF4269)	-	-	-	-	-	-	-	-	-	-	-	DUF4269
RA01001074.1	1037409.BJ6T_58020	2.6e-72	218.0	COG2315@1|root,COG2315@2|Bacteria,1RHEZ@1224|Proteobacteria,2U97K@28211|Alphaproteobacteria,3JZ02@41294|Bradyrhizobiaceae	28211|Alphaproteobacteria	S	YjbR	-	-	-	-	-	-	-	-	-	-	-	YjbR
RA01001075.1	936455.KI421499_gene3320	1.23e-24	92.4	2AHFQ@1|root,302F2@2|Bacteria,1ND0D@1224|Proteobacteria,2UINB@28211|Alphaproteobacteria,3K1HH@41294|Bradyrhizobiaceae	28211|Alphaproteobacteria	-	-	-	-	-	-	-	-	-	-	-	-	-	-
RA01001076.1	936455.KI421499_gene3321	2.11e-92	271.0	COG1846@1|root,COG1846@2|Bacteria,1RAVH@1224|Proteobacteria,2U6I0@28211|Alphaproteobacteria,3K69P@41294|Bradyrhizobiaceae	28211|Alphaproteobacteria	K	helix_turn_helix multiple antibiotic resistance protein	-	GO:0001067,GO:0003674,GO:0003676,GO:0003677,GO:0005488,GO:0005575,GO:0005622,GO:0005623,GO:0005737,GO:0006355,GO:0008150,GO:0009889,GO:0010468,GO:0010556,GO:0019219,GO:0019222,GO:0031323,GO:0031326,GO:0044212,GO:0044424,GO:0044464,GO:0050789,GO:0050794,GO:0051171,GO:0051252,GO:0060255,GO:0065007,GO:0080090,GO:0097159,GO:1901363,GO:1903506,GO:2000112,GO:2001141	-	-	-	-	-	-	-	-	-	MarR
RA01001077.1	1126627.BAWE01000004_gene3898	1.87e-84	249.0	COG1764@1|root,COG1764@2|Bacteria,1RD92@1224|Proteobacteria,2VGCK@28211|Alphaproteobacteria,3JY9H@41294|Bradyrhizobiaceae	28211|Alphaproteobacteria	O	OsmC-like protein	-	-	-	-	-	-	-	-	-	-	-	OsmC
RA01001078.1	224911.27352272	3.03e-76	229.0	COG1917@1|root,COG1917@2|Bacteria,1RCXV@1224|Proteobacteria,2U6MY@28211|Alphaproteobacteria,3JYZJ@41294|Bradyrhizobiaceae	28211|Alphaproteobacteria	S	Protein of unknown function (DUF861)	-	-	-	-	-	-	-	-	-	-	-	Cupin_2
RA01001079.1	1126627.BAWE01000004_gene3896	1.48e-190	531.0	COG0454@1|root,COG1846@1|root,COG0456@2|Bacteria,COG1846@2|Bacteria,1MWIC@1224|Proteobacteria,2TST3@28211|Alphaproteobacteria,3JRSN@41294|Bradyrhizobiaceae	28211|Alphaproteobacteria	K	Acetyltransferase (GNAT) domain	MA20_27725	-	-	-	-	-	-	-	-	-	-	Acetyltransf_1,Acetyltransf_10,MarR_2
RA01001080.1	319003.Bra1253DRAFT_01295	6.35e-76	228.0	COG5485@1|root,COG5485@2|Bacteria,1RIK8@1224|Proteobacteria,2U9XV@28211|Alphaproteobacteria,3JYS4@41294|Bradyrhizobiaceae	28211|Alphaproteobacteria	S	SnoaL-like polyketide cyclase	-	-	-	-	-	-	-	-	-	-	-	SnoaL
RA01001081.1	443598.AUFA01000005_gene3720	2.23e-264	727.0	COG0477@1|root,COG2814@2|Bacteria,1MX2P@1224|Proteobacteria,2TUAS@28211|Alphaproteobacteria,3JQNE@41294|Bradyrhizobiaceae	28211|Alphaproteobacteria	EGP	Major Facilitator Superfamily	MA20_27720	-	-	-	-	-	-	-	-	-	-	MFS_1
RA01001082.1	1304877.KI519399_gene4670	3.05e-104	301.0	COG3837@1|root,COG3837@2|Bacteria,1R9WZ@1224|Proteobacteria,2U6K6@28211|Alphaproteobacteria,3JXTD@41294|Bradyrhizobiaceae	28211|Alphaproteobacteria	S	Protein of unknown function (DUF861)	-	-	-	-	-	-	-	-	-	-	-	Cupin_2
RA01001083.1	1304878.AUGD01000002_gene2028	1.43e-107	313.0	2CI0R@1|root,2ZBW7@2|Bacteria,1RCTA@1224|Proteobacteria,2TV1Z@28211|Alphaproteobacteria,3JRPU@41294|Bradyrhizobiaceae	28211|Alphaproteobacteria	-	-	-	-	-	-	-	-	-	-	-	-	-	DUF308
RA01001084.1	1304877.KI519399_gene4668	8.4e-122	349.0	COG1309@1|root,COG1309@2|Bacteria,1QIJW@1224|Proteobacteria,2TWD8@28211|Alphaproteobacteria,3JSKH@41294|Bradyrhizobiaceae	28211|Alphaproteobacteria	K	Bacterial regulatory proteins, tetR family	-	-	-	ko:K16137	-	-	-	-	ko00000,ko03000	-	-	TetR_N
RA01001085.1	1038867.AXAY01000043_gene1915	1.3e-104	303.0	COG0242@1|root,COG0242@2|Bacteria,1RFCS@1224|Proteobacteria,2U715@28211|Alphaproteobacteria,3JUD9@41294|Bradyrhizobiaceae	28211|Alphaproteobacteria	J	Removes the formyl group from the N-terminal Met of newly synthesized proteins. Requires at least a dipeptide for an efficient rate of reaction. N-terminal L-methionine is a prerequisite for activity but the enzyme has broad specificity at other positions	def2	GO:0003674,GO:0003824,GO:0006464,GO:0006807,GO:0008150,GO:0008152,GO:0009987,GO:0016787,GO:0016810,GO:0016811,GO:0018193,GO:0018206,GO:0019538,GO:0031365,GO:0036211,GO:0042586,GO:0043170,GO:0043412,GO:0043686,GO:0044237,GO:0044238,GO:0044260,GO:0044267,GO:0071704,GO:1901564	3.5.1.88	ko:K01462	-	-	-	-	ko00000,ko01000	-	-	Pep_deformylase
RA01001086.1	1237149.C900_02118	1.94e-72	231.0	COG1266@1|root,COG1266@2|Bacteria,4NVAP@976|Bacteroidetes,47SVF@768503|Cytophagia	976|Bacteroidetes	S	CAAX protease self-immunity	-	-	-	-	-	-	-	-	-	-	-	Abi
RA01001087.1	1297863.APJF01000010_gene3330	1.12e-217	612.0	COG2114@1|root,COG2267@1|root,COG2114@2|Bacteria,COG2267@2|Bacteria,1NIJG@1224|Proteobacteria,2U09P@28211|Alphaproteobacteria,3JTK8@41294|Bradyrhizobiaceae	28211|Alphaproteobacteria	IT	Serine aminopeptidase, S33	-	-	-	-	-	-	-	-	-	-	-	Abhydrolase_1,Guanylate_cyc,Hydrolase_4,Trans_reg_C
RA01001088.1	1038860.AXAP01000009_gene7907	4.68e-18	82.8	2AD7E@1|root,312WC@2|Bacteria,1RADF@1224|Proteobacteria,2U8PK@28211|Alphaproteobacteria,3JY3M@41294|Bradyrhizobiaceae	28211|Alphaproteobacteria	-	-	-	-	-	-	-	-	-	-	-	-	-	-
RA01001089.1	1038862.KB893851_gene6559	5.61e-73	219.0	COG0640@1|root,COG0640@2|Bacteria,1N7VH@1224|Proteobacteria,2U72C@28211|Alphaproteobacteria,3JYR9@41294|Bradyrhizobiaceae	28211|Alphaproteobacteria	K	helix_turn_helix, Arsenical Resistance Operon Repressor	MA20_27670	-	-	-	-	-	-	-	-	-	-	HTH_20,HTH_5
RA01001090.1	1038862.KB893851_gene6558	2.5e-154	433.0	COG3832@1|root,COG3832@2|Bacteria,1R68R@1224|Proteobacteria,2TTYQ@28211|Alphaproteobacteria,3JT78@41294|Bradyrhizobiaceae	28211|Alphaproteobacteria	S	Activator of Hsp90 ATPase homolog 1-like protein	-	-	-	-	-	-	-	-	-	-	-	AHSA1
RA01001091.1	1278309.KB907102_gene197	1.92e-64	206.0	COG1733@1|root,COG1733@2|Bacteria,1NEKW@1224|Proteobacteria,1RYP5@1236|Gammaproteobacteria,1XRI6@135619|Oceanospirillales	135619|Oceanospirillales	K	HxlR-like helix-turn-helix	-	-	-	-	-	-	-	-	-	-	-	HxlR
RA01001093.1	1038866.KB902775_gene5506	4.31e-198	550.0	COG2207@1|root,COG3449@1|root,COG2207@2|Bacteria,COG3449@2|Bacteria,1MWTF@1224|Proteobacteria,2TRY4@28211|Alphaproteobacteria,3JV98@41294|Bradyrhizobiaceae	28211|Alphaproteobacteria	K	Bacterial transcription activator, effector binding domain	-	-	-	ko:K13652	-	-	-	-	ko00000,ko03000	-	-	GyrI-like,HTH_18
RA01001094.1	1304878.AUGD01000002_gene2034	6.29e-291	795.0	COG1680@1|root,COG1680@2|Bacteria,1P3SQ@1224|Proteobacteria,2U0E0@28211|Alphaproteobacteria,3JS2D@41294|Bradyrhizobiaceae	28211|Alphaproteobacteria	V	Beta-lactamase	MA20_27655	-	-	-	-	-	-	-	-	-	-	Beta-lactamase
RA01001095.1	754035.Mesau_05094	7.41e-150	426.0	COG0491@1|root,COG0491@2|Bacteria,1MY6G@1224|Proteobacteria,2TSXC@28211|Alphaproteobacteria	28211|Alphaproteobacteria	S	COG0491 Zn-dependent hydrolases, including glyoxylases	-	-	-	-	-	-	-	-	-	-	-	Lactamase_B
RA01001096.1	754035.Mesau_05093	1.1e-170	481.0	COG0583@1|root,COG0583@2|Bacteria,1MU2E@1224|Proteobacteria,2TUNU@28211|Alphaproteobacteria	28211|Alphaproteobacteria	K	transcriptional regulator	-	-	-	-	-	-	-	-	-	-	-	HTH_1,LysR_substrate
RA01001097.1	1173024.KI912153_gene37	5.45e-18	89.7	COG4977@1|root,COG4977@2|Bacteria,1G1HG@1117|Cyanobacteria	1117|Cyanobacteria	K	Transcriptional regulator	-	-	-	ko:K07506	-	-	-	-	ko00000,ko03000	-	-	HTH_18
RA01001098.1	1038869.AXAN01000012_gene6450	2.94e-45	152.0	COG3544@1|root,COG3544@2|Bacteria,1N0KY@1224|Proteobacteria,2VUHY@28216|Betaproteobacteria,1K8HM@119060|Burkholderiaceae	28216|Betaproteobacteria	S	Domain of unknown function (DUF305)	-	-	-	-	-	-	-	-	-	-	-	DUF305
RA01001099.1	876269.ARWA01000001_gene322	5.77e-221	625.0	COG3391@1|root,COG3391@2|Bacteria,1MVXR@1224|Proteobacteria,2TTRF@28211|Alphaproteobacteria	28211|Alphaproteobacteria	S	TIGRFAM 40-residue YVTN family beta-propeller repeat protein	-	-	-	-	-	-	-	-	-	-	-	Lactonase
RA01001101.1	195105.CN97_16170	7.32e-307	845.0	COG0265@1|root,COG3344@1|root,COG0265@2|Bacteria,COG3344@2|Bacteria,1R44F@1224|Proteobacteria,2U1J2@28211|Alphaproteobacteria	28211|Alphaproteobacteria	L	Reverse transcriptase (RNA-dependent DNA polymerase)	-	-	-	-	-	-	-	-	-	-	-	RVT_1,Trypsin_2
RA01001102.1	1038866.KB902775_gene5512	0.0	1075.0	COG0518@1|root,COG0519@1|root,COG0518@2|Bacteria,COG0519@2|Bacteria,1MU2A@1224|Proteobacteria,2TRN0@28211|Alphaproteobacteria,3JSTM@41294|Bradyrhizobiaceae	28211|Alphaproteobacteria	F	Catalyzes the synthesis of GMP from XMP	guaA	GO:0003674,GO:0003824,GO:0003921,GO:0003922,GO:0006139,GO:0006163,GO:0006164,GO:0006177,GO:0006725,GO:0006753,GO:0006793,GO:0006796,GO:0006807,GO:0008150,GO:0008152,GO:0009058,GO:0009116,GO:0009117,GO:0009119,GO:0009123,GO:0009124,GO:0009126,GO:0009127,GO:0009150,GO:0009152,GO:0009156,GO:0009161,GO:0009163,GO:0009165,GO:0009167,GO:0009168,GO:0009259,GO:0009260,GO:0009987,GO:0016874,GO:0016879,GO:…	6.3.5.2	ko:K01951	ko00230,ko00983,ko01100,map00230,map00983,map01100	M00050	R01230,R01231,R08244	RC00010,RC00204	ko00000,ko00001,ko00002,ko01000,ko01002	-	-	GATase,GMP_synt_C,NAD_synthase
RA01001103.1	318996.AXAZ01000024_gene2271	1.93e-79	236.0	COG4319@1|root,COG4319@2|Bacteria,1RF3P@1224|Proteobacteria,2U746@28211|Alphaproteobacteria,3JZ83@41294|Bradyrhizobiaceae	28211|Alphaproteobacteria	S	Domain of unknown function (DUF4440)	-	-	-	-	-	-	-	-	-	-	-	SnoaL_2
RA01001104.1	1037409.BJ6T_58440	1.33e-73	220.0	COG1917@1|root,COG1917@2|Bacteria,1RGXQ@1224|Proteobacteria,2U7IF@28211|Alphaproteobacteria,3JYR5@41294|Bradyrhizobiaceae	28211|Alphaproteobacteria	S	Cupin 2, conserved barrel domain protein	MA20_27600	-	-	-	-	-	-	-	-	-	-	-
RA01001105.1	335659.S23_42620	3.24e-44	143.0	COG1278@1|root,COG1278@2|Bacteria,1N6Q5@1224|Proteobacteria,2UF6W@28211|Alphaproteobacteria,3K050@41294|Bradyrhizobiaceae	28211|Alphaproteobacteria	K	Ribonuclease B OB domain	MA20_27595	-	-	ko:K03704	-	-	-	-	ko00000,ko03000	-	-	CSD
RA01001106.1	1126627.BAWE01000004_gene3881	1.18e-293	803.0	COG0144@1|root,COG0144@2|Bacteria,1MV2Q@1224|Proteobacteria,2TS6U@28211|Alphaproteobacteria,3JTMA@41294|Bradyrhizobiaceae	28211|Alphaproteobacteria	J	Belongs to the class I-like SAM-binding methyltransferase superfamily. RsmB NOP family	sun1	-	2.1.1.176	ko:K03500	-	-	-	-	ko00000,ko01000,ko03009	-	-	Methyltr_RsmB-F
RA01001107.1	224911.27352245	7.01e-81	244.0	COG5331@1|root,COG5331@2|Bacteria,1N7DJ@1224|Proteobacteria,2U7D2@28211|Alphaproteobacteria,3JY8V@41294|Bradyrhizobiaceae	28211|Alphaproteobacteria	S	MAPEG family	-	-	-	-	-	-	-	-	-	-	-	MAPEG
RA01001108.1	1037409.BJ6T_58480	1.16e-118	342.0	295B1@1|root,2ZSP7@2|Bacteria,1R7AT@1224|Proteobacteria,2TVE7@28211|Alphaproteobacteria,3JWZB@41294|Bradyrhizobiaceae	28211|Alphaproteobacteria	-	-	-	-	-	-	-	-	-	-	-	-	-	-
RA01001109.1	224911.27352243	4.96e-186	518.0	COG1409@1|root,COG1409@2|Bacteria,1QI4K@1224|Proteobacteria,2TV5Q@28211|Alphaproteobacteria,3JSSF@41294|Bradyrhizobiaceae	28211|Alphaproteobacteria	S	Calcineurin-like phosphoesterase superfamily domain	-	-	-	-	-	-	-	-	-	-	-	Metallophos
RA01001110.1	224911.27352242	1.47e-261	722.0	COG3616@1|root,COG3616@2|Bacteria,1MVQE@1224|Proteobacteria,2TT0V@28211|Alphaproteobacteria,3JTAI@41294|Bradyrhizobiaceae	28211|Alphaproteobacteria	E	Putative serine dehydratase domain	-	-	4.3.1.18	ko:K01753	ko00260,map00260	-	R00221	RC02600	ko00000,ko00001,ko01000	-	-	Ala_racemase_N,D-ser_dehydrat
RA01001111.1	1038862.KB893851_gene6542	8.57e-141	399.0	COG0765@1|root,COG0765@2|Bacteria,1MX2Y@1224|Proteobacteria,2U1QD@28211|Alphaproteobacteria,3JTUN@41294|Bradyrhizobiaceae	28211|Alphaproteobacteria	P	Binding-protein-dependent transport system inner membrane component	-	-	-	ko:K02029	-	M00236	-	-	ko00000,ko00002,ko02000	3.A.1.3	-	BPD_transp_1
RA01001112.1	936455.KI421499_gene3361	5.6e-140	397.0	COG0765@1|root,COG0765@2|Bacteria,1MVB6@1224|Proteobacteria,2TQRK@28211|Alphaproteobacteria,3JWQX@41294|Bradyrhizobiaceae	28211|Alphaproteobacteria	P	Binding-protein-dependent transport system inner membrane component	-	-	-	ko:K02029	-	M00236	-	-	ko00000,ko00002,ko02000	3.A.1.3	-	BPD_transp_1
RA01001113.1	1038862.KB893851_gene6540	1.17e-163	459.0	COG1126@1|root,COG1126@2|Bacteria,1MU9Q@1224|Proteobacteria,2TQX2@28211|Alphaproteobacteria,3JQWI@41294|Bradyrhizobiaceae	28211|Alphaproteobacteria	E	ATPases associated with a variety of cellular activities	glnQ	-	3.6.3.21	ko:K02028,ko:K02029,ko:K09972,ko:K10004	ko02010,ko02020,map02010,map02020	M00230,M00232,M00236	-	-	ko00000,ko00001,ko00002,ko01000,ko02000	3.A.1.3,3.A.1.3.17,3.A.1.3.18,3.A.1.3.19,3.A.1.3.4,3.A.1.3.7,3.A.1.3.8	-	ABC_tran
RA01001114.1	224911.27352238	9.25e-177	494.0	COG0834@1|root,COG0834@2|Bacteria,1MVT6@1224|Proteobacteria,2TU5Z@28211|Alphaproteobacteria,3JTCT@41294|Bradyrhizobiaceae	28211|Alphaproteobacteria	ET	Bacterial periplasmic substrate-binding proteins	-	-	-	ko:K02030	-	M00236	-	-	ko00000,ko00002,ko02000	3.A.1.3	-	SBP_bac_3
RA01001115.1	224911.27352237	5.12e-73	219.0	COG0251@1|root,COG0251@2|Bacteria,1MZ5K@1224|Proteobacteria,2U9GI@28211|Alphaproteobacteria,3K68A@41294|Bradyrhizobiaceae	28211|Alphaproteobacteria	J	Endoribonuclease L-PSP	-	-	-	-	-	-	-	-	-	-	-	Ribonuc_L-PSP
RA01001116.1	936455.KI421499_gene3365	3.9e-242	665.0	COG3608@1|root,COG3608@2|Bacteria,1MUAA@1224|Proteobacteria,2TSVB@28211|Alphaproteobacteria,3JW4N@41294|Bradyrhizobiaceae	28211|Alphaproteobacteria	S	Succinylglutamate desuccinylase / Aspartoacylase family	-	-	-	ko:K06987	-	-	-	-	ko00000	-	-	AstE_AspA
RA01001117.1	1037409.BJ6T_58570	7.01e-228	630.0	COG1609@1|root,COG1609@2|Bacteria,1MVFR@1224|Proteobacteria,2U4CQ@28211|Alphaproteobacteria,3JVQM@41294|Bradyrhizobiaceae	28211|Alphaproteobacteria	K	helix_turn _helix lactose operon repressor	-	-	-	ko:K06145	-	-	-	-	ko00000,ko03000	-	-	LacI,Peripla_BP_3
RA01001118.1	1038866.KB902775_gene5520	1.65e-53	169.0	2AINI@1|root,3194Y@2|Bacteria,1N060@1224|Proteobacteria,2UC4S@28211|Alphaproteobacteria,3K074@41294|Bradyrhizobiaceae	28211|Alphaproteobacteria	-	-	-	-	-	-	-	-	-	-	-	-	-	-
RA01001119.1	1038862.KB893851_gene6534	1.11e-243	669.0	COG2130@1|root,COG2130@2|Bacteria,1MUC2@1224|Proteobacteria,2TQYM@28211|Alphaproteobacteria,3JRF5@41294|Bradyrhizobiaceae	28211|Alphaproteobacteria	S	N-terminal domain of oxidoreductase	MA20_27525	-	1.1.1.1	ko:K00001,ko:K07119	ko00010,ko00071,ko00350,ko00625,ko00626,ko00830,ko00980,ko00982,ko01100,ko01110,ko01120,ko01130,ko01220,map00010,map00071,map00350,map00625,map00626,map00830,map00980,map00982,map01100,map01110,map01120,map01130,map01220	-	R00623,R00754,R02124,R04805,R04880,R05233,R05234,R06917,R06927,R07105,R08281,R08306,R08310	RC00050,RC00087,RC00088,RC00099,RC00116,RC00649,RC01734,RC02273	ko00000,ko00001,ko01000	-	-	ADH_N_2,ADH_zinc_N
RA01001120.1	936455.KI421499_gene3370	0.0	940.0	COG0516@1|root,COG0517@1|root,COG0516@2|Bacteria,COG0517@2|Bacteria,1MUJM@1224|Proteobacteria,2TQXC@28211|Alphaproteobacteria,3JSB9@41294|Bradyrhizobiaceae	28211|Alphaproteobacteria	F	Catalyzes the conversion of inosine 5'-phosphate (IMP) to xanthosine 5'-phosphate (XMP), the first committed and rate- limiting step in the de novo synthesis of guanine nucleotides, and therefore plays an important role in the regulation of cell growth	guaB	GO:0003674,GO:0003824,GO:0003938,GO:0005575,GO:0005622,GO:0005623,GO:0005737,GO:0006139,GO:0006163,GO:0006164,GO:0006183,GO:0006725,GO:0006753,GO:0006793,GO:0006796,GO:0006807,GO:0008150,GO:0008152,GO:0009058,GO:0009116,GO:0009117,GO:0009119,GO:0009141,GO:0009142,GO:0009144,GO:0009145,GO:0009150,GO:0009152,GO:0009163,GO:0009165,GO:0009199,GO:0009201,GO:0009205,GO:0009206,GO:0009259,GO:0009260,GO:…	1.1.1.205,1.7.1.7	ko:K00088,ko:K00364	ko00230,ko00983,ko01100,ko01110,map00230,map00983,map01100,map01110	M00050	R01130,R01134,R08240	RC00143,RC00457,RC02207	ko00000,ko00001,ko00002,ko01000,ko04147	-	-	CBS,IMPDH,NMO
RA01001121.1	1037409.BJ6T_58610	0.0	882.0	COG0477@1|root,COG0477@2|Bacteria,1QTWJ@1224|Proteobacteria,2TVYQ@28211|Alphaproteobacteria,3JT2H@41294|Bradyrhizobiaceae	28211|Alphaproteobacteria	EGP	Major Facilitator Superfamily	MA20_27515	-	-	-	-	-	-	-	-	-	-	MFS_1
RA01001122.1	936455.KI421499_gene3372	2.35e-130	404.0	29WN0@1|root,30I8U@2|Bacteria,1R9ZX@1224|Proteobacteria,2U6YZ@28211|Alphaproteobacteria,3JYHH@41294|Bradyrhizobiaceae	28211|Alphaproteobacteria	-	-	-	-	-	-	-	-	-	-	-	-	-	-
RA01001123.1	318996.AXAZ01000024_gene2257	3.8e-155	436.0	COG0293@1|root,COG0293@2|Bacteria,1MW1C@1224|Proteobacteria,2TSBW@28211|Alphaproteobacteria,3JRJX@41294|Bradyrhizobiaceae	28211|Alphaproteobacteria	J	Specifically methylates the uridine in position 2552 of 23S rRNA at the 2'-O position of the ribose in the fully assembled 50S ribosomal subunit	ftsJ	-	2.1.1.166	ko:K02427	-	-	-	-	ko00000,ko01000,ko03009	-	-	FtsJ
RA01001124.1	319003.Bra1253DRAFT_01353	1.88e-254	701.0	COG0248@1|root,COG0248@2|Bacteria,1MV35@1224|Proteobacteria,2TT2C@28211|Alphaproteobacteria,3JRA2@41294|Bradyrhizobiaceae	28211|Alphaproteobacteria	FP	Ppx/GppA phosphatase family	ppx	-	3.6.1.11,3.6.1.40	ko:K01524	ko00230,map00230	-	R03409	RC00002	ko00000,ko00001,ko01000	-	-	Ppx-GppA
RA01001125.1	224911.27352229	0.0	1513.0	COG1529@1|root,COG1529@2|Bacteria,1MUEA@1224|Proteobacteria,2TQMW@28211|Alphaproteobacteria,3JQVN@41294|Bradyrhizobiaceae	28211|Alphaproteobacteria	C	Aldehyde oxidase and xanthine dehydrogenase, a/b hammerhead domain	MA20_27485	-	1.2.5.3	ko:K03520	-	-	R11168	RC02800	ko00000,ko01000	-	-	Ald_Xan_dh_C,Ald_Xan_dh_C2
RA01001126.1	224911.27352306	0.0	1043.0	COG4108@1|root,COG4108@2|Bacteria,1MU7X@1224|Proteobacteria,2TRP5@28211|Alphaproteobacteria,3JRKD@41294|Bradyrhizobiaceae	28211|Alphaproteobacteria	J	Increases the formation of ribosomal termination complexes and stimulates activities of RF-1 and RF-2. It binds guanine nucleotides and has strong preference for UGA stop codons. It may interact directly with the ribosome. The stimulation of RF- 1 and RF-2 is significantly reduced by GTP and GDP, but not by GMP	prfC	-	-	ko:K02837	-	-	-	-	ko00000,ko03012	-	-	GTP_EFTU,GTP_EFTU_D2,RF3_C
RA01001127.1	936455.KI421499_gene3287	5.37e-59	183.0	COG2076@1|root,COG2076@2|Bacteria,1MZ6P@1224|Proteobacteria,2UBR4@28211|Alphaproteobacteria,3JZDI@41294|Bradyrhizobiaceae	28211|Alphaproteobacteria	P	PFAM small multidrug resistance protein	sugE	-	-	ko:K11741	-	-	-	-	ko00000,ko02000	2.A.7.1	-	Multi_Drug_Res
RA01001128.1	1038862.KB893856_gene828	1.84e-201	562.0	COG0306@1|root,COG0306@2|Bacteria,1MVXK@1224|Proteobacteria,2TSYI@28211|Alphaproteobacteria,3JS65@41294|Bradyrhizobiaceae	28211|Alphaproteobacteria	P	Phosphate transporter family	pit	-	-	ko:K03306	-	-	-	-	ko00000	2.A.20	-	PHO4
RA01001129.1	1038862.KB893856_gene829	1.63e-147	416.0	COG1392@1|root,COG1392@2|Bacteria,1R4SP@1224|Proteobacteria,2U5E0@28211|Alphaproteobacteria,3JRFS@41294|Bradyrhizobiaceae	28211|Alphaproteobacteria	P	Protein of unknown function DUF47	MA20_27875	-	-	ko:K07220	-	-	-	-	ko00000	-	-	NUDIX,PhoU_div
RA01001130.1	1038862.KB893856_gene830	3.07e-215	596.0	COG4177@1|root,COG4177@2|Bacteria,1MWP3@1224|Proteobacteria,2TR99@28211|Alphaproteobacteria,3JURB@41294|Bradyrhizobiaceae	28211|Alphaproteobacteria	E	Belongs to the binding-protein-dependent transport system permease family	MA20_27870	-	-	ko:K01998	ko02010,ko02024,map02010,map02024	M00237	-	-	ko00000,ko00001,ko00002,ko02000	3.A.1.4	-	BPD_transp_2
RA01001131.1	1037409.BJ6T_57780	9.01e-195	541.0	COG0559@1|root,COG0559@2|Bacteria,1MY1E@1224|Proteobacteria,2TSIQ@28211|Alphaproteobacteria,3JTUY@41294|Bradyrhizobiaceae	28211|Alphaproteobacteria	E	Belongs to the binding-protein-dependent transport system permease family	MA20_27865	-	-	ko:K01997	ko02010,ko02024,map02010,map02024	M00237	-	-	ko00000,ko00001,ko00002,ko02000	3.A.1.4	-	BPD_transp_2
RA01001132.1	936455.KI421499_gene3292	8.58e-290	791.0	COG0683@1|root,COG0683@2|Bacteria,1MUCB@1224|Proteobacteria,2TRWV@28211|Alphaproteobacteria,3JS24@41294|Bradyrhizobiaceae	28211|Alphaproteobacteria	E	Periplasmic binding protein domain	-	-	-	ko:K01999	ko02010,ko02024,map02010,map02024	M00237	-	-	ko00000,ko00001,ko00002,ko02000	3.A.1.4	-	Peripla_BP_6
RA01001133.1	936455.KI421499_gene3293	2.68e-172	481.0	COG0410@1|root,COG0410@2|Bacteria,1MUR3@1224|Proteobacteria,2TSWQ@28211|Alphaproteobacteria,3JT2Z@41294|Bradyrhizobiaceae	28211|Alphaproteobacteria	E	ATPases associated with a variety of cellular activities	MA20_27855	-	-	ko:K01996	ko02010,ko02024,map02010,map02024	M00237	-	-	ko00000,ko00001,ko00002,ko02000	3.A.1.4	-	ABC_tran
RA01001134.1	1037409.BJ6T_57810	1.43e-173	484.0	COG0411@1|root,COG0411@2|Bacteria,1MX51@1224|Proteobacteria,2TTCE@28211|Alphaproteobacteria,3JR62@41294|Bradyrhizobiaceae	28211|Alphaproteobacteria	E	ABC transporter	MA20_27850	-	-	ko:K01995	ko02010,ko02024,map02010,map02024	M00237	-	-	ko00000,ko00001,ko00002,ko02000	3.A.1.4	-	ABC_tran,BCA_ABC_TP_C
RA01001135.1	443598.AUFA01000005_gene3693	3.13e-141	400.0	COG5388@1|root,COG5388@2|Bacteria,1MY02@1224|Proteobacteria,2U114@28211|Alphaproteobacteria,3JWNF@41294|Bradyrhizobiaceae	28211|Alphaproteobacteria	S	PAS domain	-	-	-	-	-	-	-	-	-	-	-	PAS_5
[truncated: 5,436 more rows]

## Sheet: Identification of the rhizobium
user_genome	classification	closest_genome_reference	closest_genome_reference_radius	closest_genome_taxonomy	closest_genome_ani	closest_genome_af	closest_placement_reference	closest_placement_radius	closest_placement_taxonomy	closest_placement_ani	closest_placement_af	pplacer_taxonomy	classification_method	note	other_related_references(genome_id,species_name,radius,ANI,AF)	msa_percent	translation_table	red_value	warnings
[truncated: 3 more rows]

[truncated: 3 more sheets: Caculation of ANT value, GGDC estimate the DDH value, ANI heatmap data]
