# Supplementary material for: A telomere-to-telomere genome of raintree (Samanea Saman) reveals its ecological adaptation characteristics of nyctinastic movement and symbiotic nitrogen fixation
Source: Research Square preprint supplement (doi:10.21203/rs.3.rs-7165529/v1), 2025-08-13
Supplement: Supplementary file 4 [file 5223571f32d88a40160d2280.xlsx]

## Sheet: Rootnodule vs Root
id	Root R1	Root R2	Root R3	Root average	Root nodule R1	Root nodule R2	Root nodule R3	Root nodule average	Root nodule/Root	Log2(Root nodule/Root）	Leaflet T2 R1	Leaflet T2 R2	Leaflet T2 R3	Leaflet T2 Average	Leaflet/Root	Log2(Rootnodule/Leaflet	description
Ssa01002309	0.825	0.104	56.275	19.068	53529	40301.8	83605	59145.3	3101.81	11.5989	0.101	0	0	0.0336667	0.00176561	20.7445	Ssa01002309,Belongs to the globin family,Globin
Ssa01002310	0.413	0.104	45.262	15.2597	34237.4	26705.2	36484.8	32475.8	2128.21	11.0554	0	0	0.318	0.106	0.00694642	18.2249	Ssa01002310,Belongs to the globin family,Globin
Ssa02009790	0	0	6.875	2.29167	2928.57	5769.04	2621.54	3773.05	1646.42	10.6851	0	0	0	0	0	#DIV/0!	Ssa02009790,Universal stress protein,Usp
Ssa05016382	0	0.281	0	0.0936667	145.631	144.928	91.574	127.378	1359.9	10.4093	4.109	2.62	1.725	2.818	30.0854	5.4983	Ssa05016382,-,-
Ssa11005476	0.034	0.025	0.178	0.079	98.709	64.163	124.173	95.6817	1211.16	10.2422	0	0	0	0	0	#DIV/0!	Ssa11005476,Belongs to the multicopper oxidase family,"Cu-oxidase,Cu-oxidase_2,Cu-oxidase_3"
Ssa05016467	0	0	0.066	0.022	22.06	26.626	26.079	24.9217	1132.8	10.1457	0	0.058	0.173	0.077	3.5	8.33833	Ssa05016467,Belongs to the MIP aquaporin (TC 1.A.8) family,MIP
Ssa10004608	0	0	0.085	0.0283333	19.358	42.122	21.178	27.5527	972.447	9.92548	0	0	0.074	0.0246667	0.870588	10.1254	Ssa10004608,Werner Syndrome-like exonuclease,DNA_pol_A_exo1
Ssa01001834	0	0	0.8	0.266667	335.324	248.773	146.937	243.678	913.793	9.83572	0	0	0	0	0	#DIV/0!	Ssa01001834,purine permease,PUNUT
Ssa02009495	0	0	4.204	1.40133	1231.21	1227.33	1073.81	1177.45	840.236	9.71465	0	0	0	0	0	#DIV/0!	Ssa02009495,Belongs to the globin family,Globin
Ssa05016383	0.707	0	0.622	0.443	194.154	662.868	251.828	369.617	834.349	9.70451	3.637	4.97	6.545	5.05067	11.4011	6.19341	Ssa05016383,-,-
Ssa01001871	0	0	0.038	0.0126667	13.298	10.526	6.949	10.2577	809.816	9.66145	0	0	0	0	0	#DIV/0!	Ssa01001871,Belongs to the multi antimicrobial extrusion (MATE) (TC 2.A.66.1) family,MatE
Ssa01002204	1.397	1.403	14.139	5.64633	2810.18	6377.67	3652.13	4279.99	758.013	9.56608	0	0	0	0	0	#DIV/0!	Ssa01002204,NADH-ubiquinone reductase complex 1 MLRQ subunit,B12D
Ssa05017062	0	0	0.027	0.009	2.638	13.103	4.464	6.735	748.333	9.54754	0.448	0.357	0.541	0.448667	49.8519	3.90796	Ssa05017062,Cysteine-rich receptor-like protein kinase,"Pkinase,Pkinase_Tyr,Stress-antifung"
Ssa08022406	0	0	0.454	0.151333	156.181	91.32	79.597	109.033	720.48	9.49281	0	0	0	0	0	#DIV/0!	Ssa08022406,Protein NRT1 PTR FAMILY,PTR2
Ssa02011202	0	0	0.454	0.151333	154.8	91.053	79.223	108.359	716.026	9.48387	0	0	0	0	0	#DIV/0!	Ssa02011202,Protein NRT1 PTR FAMILY,PTR2
Ssa07020032	0	0	0.126	0.042	20.378	30.163	26.323	25.6213	610.032	9.25274	0	0	0	0	0	#DIV/0!	Ssa07020032,Ribonuclease 3-like protein,"Ribonucleas_3_3,Ribonuclease_3,dsrm"
Ssa11006412	0.646	0.139	0.081	0.288667	264.556	94.524	150.919	170	588.913	9.20191	0.136	0	0	0.0453333	0.157044	11.8727	Ssa11006412,GEM-like protein,GRAM
Ssa13008585	0	0	0.413	0.137667	89.249	80.151	64.816	78.072	567.109	9.14748	0	0	0	0	0	#DIV/0!	Ssa13008585,WAT1-related protein,EamA
Ssa04014332	0	0	1.149	0.383	210.952	274.697	144.27	209.973	548.232	9.09864	0	0	0	0	0	#DIV/0!	Ssa04014332,Belongs to the Casparian strip membrane proteins (CASP) family,DUF588
Ssa03012373	0	0	0.558	0.186	104.892	100.18	97.398	100.823	542.061	9.08231	0	0	0	0	0	#DIV/0!	Ssa03012373,Belongs to the major facilitator superfamily. Sugar transporter (TC 2.A.1.1) family,Sugar_tr
Ssa07020610	0	0	0.041	0.0136667	5.927	5.44	10.529	7.29867	534.049	9.06083	0.068	0.072	0.214	0.118	8.63415	5.95077	Ssa07020610,N-acetyltransferase,Acetyltransf_1
Ssa04014521	0	0	0.639	0.213	126.184	72.046	140.629	112.953	530.296	9.05065	0	0	0	0	0	#DIV/0!	Ssa04014521,zinc finger,-
Ssa10003010	0.065	0.049	0.028	0.0473333	27.869	9.093	38.149	25.037	528.951	9.04699	1.687	23.085	2.62	9.13067	192.901	1.45527	Ssa10003010,Protein NRT1 PTR FAMILY 7.1-like,PTR2
Ssa10003272	0.067	0.05	0.177	0.098	66.414	51.977	32.776	50.389	514.173	9.00611	0	0	0	0	0	#DIV/0!	Ssa10003272,Encoded by,Mem_trans
Ssa01002144	0.084	0.063	0	0.049	28.165	7.977	38.277	24.8063	506.252	8.98371	0	0.131	0	0.0436667	0.891156	9.14996	Ssa01002144,RING-H2 finger protein,zf-RING_2
Ssa02010051	0.064	0.048	1.409	0.507	329.674	192.353	238.775	253.601	500.199	8.96636	0	0	0	0	0	#DIV/0!	Ssa02010051,Sulfate transporter,"STAS,Sulfate_transp"
Ssa02009494	0	0	1.08	0.36	198.83	167.169	173.414	179.804	499.456	8.96422	0	0	0	0	0	#DIV/0!	Ssa02009494,Belongs to the globin family,Globin
Ssa11005500	0	0	0.732	0.244	105.467	120.913	126.868	117.749	482.579	8.91462	0	0	0	0	0	#DIV/0!	Ssa11005500,Belongs to the alpha-IPM synthase homocitrate synthase family,"HMGL-like,LeuA_dimer"
Ssa03013734	0	0	0.517	0.172333	89.928	74.521	64.879	76.4427	443.574	8.79303	0	0	0	0	0	#DIV/0!	Ssa03013734,WAT1-related protein,EamA
Ssa11005596	0	0	0.515	0.171667	88.763	72.693	65.46	75.6387	440.614	8.78337	0	0	0	0	0	#DIV/0!	Ssa11005596,PLAC8 family,PLAC8
Ssa12007526	0.214	0.04	0.33	0.194667	115.727	75.746	49.228	80.2337	412.159	8.68706	0.118	0.084	0.041	0.081	0.416096	9.95207	Ssa12007526,Belongs to the class I-like SAM-binding methyltransferase superfamily. Cation-independent O- methyltransferase family,"Dimerisation,Methyltransf_2"
Ssa12006663	0	0.14	0	0.0466667	12.409	31.345	12.243	18.6657	399.979	8.64378	0	0	0	0	0	#DIV/0!	Ssa12006663,Protein transport protein Sec61 subunit,Sec61_beta
Ssa11005499	0.923	0.139	0.162	0.408	42.612	96.862	328.373	155.949	382.228	8.57829	0	0	0	0	0	#DIV/0!	Ssa11005499,-,-
Ssa05017049	0	0.412	1.443	0.618333	243.04	298.574	161.608	234.407	379.095	8.56642	0	0	0	0	0	#DIV/0!	Ssa05017049,MYB-like transcription factor ETC1,Myb_DNA-binding
Ssa01002586	0	0	0.049	0.0163333	7.355	6.23	4.906	6.16367	377.367	8.55983	10.703	11.507	13.829	12.013	735.49	-0.962736	Ssa01002586,Glycosyltransferase family 10 (fucosyltransferase) C-term,Glyco_transf_10
Ssa09025466	0	0	0.496	0.165333	98.094	43.197	37.97	59.7537	361.413	8.49751	3.456	2.204	1.161	2.27367	13.752	4.71593	Ssa09025466,Flowering-promoting factor 1-like,-
Ssa12007592	0.115	0	8.664	2.92633	57.827	2974.46	111.02	1047.77	358.048	8.48401	0.421	0	0	0.140333	0.0479553	12.8662	Ssa12007592,Thaumatin family,Thaumatin
Ssa10004124	0.115	0	8.664	2.92633	58.462	2952.09	112.61	1041.05	355.754	8.47474	0.421	0	0	0.140333	0.0479553	12.8569	Ssa10004124,Thaumatin family,Thaumatin
Ssa02010949	0	0	0.081	0.027	10.712	8.978	8.2	9.29667	344.321	8.42761	0	0	0	0	0	#DIV/0!	Ssa02010949,Plant invertase/pectin methylesterase inhibitor,PMEI
Ssa13008444	0	0	0.173	0.0576667	24.347	18.512	14.279	19.046	330.277	8.36753	0	0	0	0	0	#DIV/0!	Ssa13008444,RESISTANCE protein,"LRR_3,LRR_8,NB-ARC,TIR"
Ssa06019369	0	0	3.542	1.18067	418.977	465.253	254.712	379.647	321.553	8.32891	0	0	0	0	0	#DIV/0!	Ssa06019369,Vacuolar iron transporter homolog,VIT1
Ssa13008108	0	0.033	0.352	0.128333	42.254	58.588	21.637	40.8263	318.127	8.31346	1.275	1.285	1.51	1.35667	10.5714	4.91136	Ssa13008108,Putative lipopolysaccharide-modifying enzyme.,Glyco_transf_90
Ssa06019363	0.102	0.077	0	0.0596667	23.862	21.765	10.949	18.8587	316.067	8.30409	0	0	0	0	0	#DIV/0!	Ssa06019363,NAC transcription factor,NAM
Ssa13009400	0	0	0.275	0.0916667	27.917	36.283	21.564	28.588	311.869	8.2848	0	0	0	0	0	#DIV/0!	Ssa13009400,Belongs to the peroxidase family. Classical plant (class III) peroxidase subfamily,peroxidase
Ssa11005620	0	0.177	0	0.059	22.662	10.441	21.395	18.166	307.898	8.26631	16.799	14.357	12.181	14.4457	244.842	0.330604	Ssa11005620,-,-
Ssa11005249	0.088	0.232	0.194	0.171333	82.844	30.337	38.522	50.5677	295.142	8.20527	0.162	1.653	0.204	0.673	3.92802	6.23146	Ssa11005249,Belongs to the peptidase A1 family,"TAXi_C,TAXi_N"
Ssa03013906	0	0	0.053	0.0176667	10.255	4.174	1.185	5.20467	294.604	8.20263	0	0.094	0.462	0.185333	10.4906	4.81161	Ssa03013906,Belongs to the sulfotransferase 1 family,Sulfotransfer_1
Ssa05017141	0.082	0.031	0.181	0.098	37.154	14.666	34.716	28.8453	294.34	8.20134	1.664	1.415	0.349	1.14267	11.6599	4.65786	Ssa05017141,Belongs to the UDP-glycosyltransferase family,UDPGT
Ssa05016795	0	0	0.925	0.308333	144.055	52.617	69.597	88.7563	287.858	8.16922	0	0	0	0	0	#DIV/0!	Ssa05016795,purine permease,PUNUT
Ssa09025195	0	0	0.53	0.176667	57.609	53.431	25.85	45.63	258.283	8.01281	0.725	0.814	0.93	0.823	4.65849	5.79295	Ssa09025195,Transcription factor,HLH
Ssa05016497	0	0	2.931	0.977	473.573	134.053	141.313	249.646	255.523	7.99731	0	0	0	0	0	#DIV/0!	Ssa05016497,Isochorismatase family,Isochorismatase
Ssa11006387	0.11	0.166	0.485	0.253667	49.127	123.432	18.19	63.583	250.656	7.96956	1.985	2.497	1.786	2.08933	8.23653	4.92753	Ssa11006387,Belongs to the iron ascorbate-dependent oxidoreductase family,"2OG-FeII_Oxy,DIOX_N"
Ssa09024435	0.854	2.701	4.057	2.53733	109.876	868.163	913.88	630.64	248.544	7.95736	0.879	3.736	7.381	3.99867	1.57593	7.30115	Ssa09024435,Non-specific lipid-transfer protein 1-like,Tryp_alpha_amyl
Ssa13009294	0	0	0.035	0.0116667	2.751	1.817	3.843	2.80367	240.314	7.90878	17.962	18.933	24.377	20.424	1750.63	-2.86488	Ssa13009294,Glycerol-3-phosphate 2-O-acyltransferase,"Acyltransferase,HAD"
Ssa01001954	0	0	2.688	0.896	279.081	249.273	88.908	205.754	229.636	7.84321	0	0	0	0	0	#DIV/0!	Ssa01001954,Belongs to the Casparian strip membrane proteins (CASP) family,DUF588
Ssa02012037	0	0	1.556	0.518667	135.753	147.499	70.074	117.775	227.073	7.82701	0	0	0	0	0	#DIV/0!	Ssa02012037,Bifunctional monodehydroascorbate reductase and carbonic anhydrase nectarin-3-like,Carb_anhydrase
Ssa05015815	0	0	0.049	0.0163333	0	0.756	10.354	3.70333	226.735	7.82486	0.082	0.044	0.086	0.0706667	4.32653	5.71165	Ssa05015815,phosphatase 2C,"PP2C,RVT_3"
Ssa12007591	0.229	0	5.44	1.88967	19.223	1236.41	26.669	427.433	226.195	7.82142	0.168	0	0	0.056	0.0296349	12.898	Ssa12007591,Thaumatin family,Thaumatin
Ssa06018430	0	0.062	0	0.0206667	6.549	3.183	4.291	4.67433	226.177	7.82131	0	0	0	0	0	#DIV/0!	Ssa06018430,Belongs to the multi antimicrobial extrusion (MATE) (TC 2.A.66.1) family,MatE
Ssa04015345	0.038	0.085	0.033	0.052	10.317	11.129	13.47	11.6387	223.821	7.8062	26.138	26.689	34.139	28.9887	557.474	-1.31656	Ssa04015345,guanine nucleotide exchange factor,PRONE
Ssa12007517	0	0	1.842	0.614	155.612	163.397	90.035	136.348	222.065	7.79484	0	0	0	0	0	#DIV/0!	Ssa12007517,12-oxophytodienoate reductase,Oxidored_FMN
Ssa12007305	0	0.076	0.179	0.085	19.005	19.547	15.448	18	211.765	7.72632	0	0	0.078	0.026	0.305882	9.43527	Ssa12007305,Protein LIGHT-DEPENDENT SHORT HYPOCOTYLS,DUF640
Ssa02010640	1.665	2.604	14.2	6.15633	980.239	1653.99	1217.81	1284.01	208.568	7.70437	0	0	0	0	0	#DIV/0!	Ssa02010640,Belongs to the globin family,Globin
Ssa06018359	0	0.032	0.113	0.0483333	16.588	8.033	5.589	10.07	208.345	7.70283	0.063	0.1	0.099	0.0873333	1.8069	6.84932	Ssa06018359,Regulatory protein,"Ank_2,Ank_3,BTB,DUF3420"
Ssa13009036	0.186	0	0.055	0.0803333	12.868	11.965	24.022	16.285	202.718	7.66333	109.165	121.362	84.692	105.073	1307.96	-2.68978	Ssa13009036,"quinone-oxidoreductase homolog, chloroplastic","ADH_N,ADH_zinc_N_2"
Ssa02011883	0.084	0.253	1.995	0.777333	0.583	470.118	0	156.9	201.844	7.6571	0	0	0	0	0	#DIV/0!	Ssa02011883,Cysteine-rich repeat secretory protein,"DUF1204,Stress-antifung"
Ssa09025832	0.04	0	0.035	0.025	1.212	7.365	6.238	4.93833	197.533	7.62595	0.321	0.217	0.061	0.199667	7.98667	4.62836	Ssa09025832,Cytochrome p450,p450
Ssa07020859	0	0.127	0.297	0.141333	43.026	25.098	14.373	27.499	194.568	7.60413	0	0.264	0.13	0.131333	0.929245	7.71	Ssa07020859,Asparagine synthetase,"Asn_synthase,GATase_7"
Ssa01002115	0.606	1.096	1.494	1.06533	29.839	231.332	352.961	204.711	192.156	7.58614	0	0	0	0	0	#DIV/0!	Ssa01002115,PAR1 protein,PAR1
Ssa11005277	0.104	0.26	0.091	0.151667	49.405	18.662	16.977	28.348	186.91	7.5462	0	0	0	0	0	#DIV/0!	Ssa11005277,Protein NRT1 PTR FAMILY 6.3-like,PTR2
Ssa13008465	3.012	3.416	4.461	3.62967	711.906	576.185	698.465	662.185	182.437	7.51125	0.056	0.179	0.059	0.098	0.0269997	12.7222	Ssa13008465,-,-
Ssa12006962	0.315	0	0.832	0.382333	21.145	68.731	110.838	66.9047	174.99	7.45113	1.854	2.217	2.677	2.24933	5.88317	4.89454	Ssa12006962,-,-
Ssa05017179	0.044	0	0.231	0.0916667	10.735	8.516	26.086	15.1123	164.862	7.36511	0.837	0.479	0.777	0.697667	7.61091	4.43704	Ssa05017179,Belongs to the cytochrome P450 family,p450
Ssa09025272	0.096	0.072	0.254	0.140667	21.405	23.237	23.646	22.7627	161.82	7.33825	0	0	0	0	0	#DIV/0!	Ssa09025272,-,-
Ssa09025615	0	0.038	0	0.0126667	3.587	0.82	1.641	2.016	159.158	7.31431	0	0	0	0	0	#DIV/0!	Ssa09025615,-,-
Ssa11004965	0	0	1.456	0.485333	89.831	93.72	47.607	77.0527	158.762	7.31073	0	0.031	0.03	0.0203333	0.0418956	11.8878	Ssa11004965,Belongs to the major facilitator superfamily. Sugar transporter (TC 2.A.1.1) family,Sugar_tr
Ssa04014662	0.115	0.116	0.371	0.200667	44.306	41.761	9.063	31.71	158.023	7.30399	0	0	0	0	0	#DIV/0!	Ssa04014662,Protein NRT1 PTR FAMILY,PTR2
Ssa02011895	1.031	0.517	0.806	0.784667	110.252	169.839	86.43	122.174	155.701	7.28264	23.147	23.349	19.263	21.9197	27.935	2.47864	Ssa02011895,-,-
Ssa11006386	0.11	0.083	0.241	0.144667	18.78	41.783	6.587	22.3833	154.724	7.27355	5.277	4.624	3.087	4.32933	29.9263	2.37021	Ssa11006386,Belongs to the iron ascorbate-dependent oxidoreductase family,"2OG-FeII_Oxy,DIOX_N"
Ssa02010027	0.273	0.205	0.48	0.319333	54.693	44.828	45.94	48.487	151.838	7.24639	110.308	110.419	89.759	103.495	324.098	-1.0939	Ssa02010027,"This protein plays a role in synthesis of starch. It catalyzes the synthesis of the activated glycosyl donor, ADP- glucose from Glc-1-P and ATP",NTP_transferase
Ssa09024937	0.217	0	0.095	0.104	16.751	10.495	17.032	14.7593	141.917	7.1489	0.08	0	0	0.0266667	0.25641	9.11237	Ssa09024937,-,DUF688
Ssa04015346	0.43	0.324	0	0.251333	38.579	35.908	32.081	35.5227	141.337	7.14299	231.69	225.194	299.967	252.284	1003.78	-2.82824	Ssa04015346,Photosystem I reaction center subunit,PSI_PsaH
Ssa06018841	0.41	0.247	0.216	0.291	54.219	35.369	31.183	40.257	138.34	7.11208	2.772	3.843	3.923	3.51267	12.071	3.5186	Ssa06018841,Developmental protein SEPALLATA,"K-box,SRF-TF"
Ssa04014333	0	0.103	0	0.0343333	3.286	7.044	3.65	4.66	135.728	7.08458	0	0	0	0	0	#DIV/0!	Ssa04014333,Methyltransferase FkbM domain,"Methyltransf_11,Methyltransf_21"
Ssa01001521	0.066	0	0.117	0.061	14.295	7.379	2.87	8.18133	134.12	7.06738	0	0.052	0	0.0173333	0.284153	8.88264	Ssa01001521,Plant protein of unknown function (DUF868),DUF868
Ssa08023776	0.43	0	0	0.143333	13.589	18.797	24.654	19.0133	132.651	7.05149	0	0	0	0	0	#DIV/0!	Ssa08023776,Histone-like transcription factor (CBF/NF-Y) and archaeal histone,CBFD_NFYB_HMF
Ssa10003866	0	0	0.254	0.0846667	9.345	14.36	9.715	11.14	131.575	7.03974	8.913	8.571	13.144	10.2093	120.583	0.125861	Ssa10003866,-,-
Ssa06018196	0.043	0	0	0.0143333	2.714	2.423	0.409	1.84867	128.977	7.01097	0	0	0	0	0	#DIV/0!	Ssa06018196,Aluminum-activated malate transporter,ALMT
Ssa10004027	0	0	0.239	0.0796667	22.062	8.12	0.412	10.198	128.008	7.00009	0	0	0	0	0	#DIV/0!	Ssa10004027,cystathionine beta-lyase,Cys_Met_Meta_PP
Ssa09024959	1.134	2.257	2.138	1.843	175.903	17.072	506.166	233.047	126.45	6.98242	3.275	3.734	4.564	3.85767	2.09315	5.91675	Ssa09024959,Rare lipoprotein A (RlpA)-like double-psi beta-barrel,"DPBB_1,Pollen_allerg_1"
Ssa06017922	0.167	0.031	0.11	0.102667	16.017	14.111	8.402	12.8433	125.097	6.96691	31.056	26.667	29.245	28.9893	282.364	-1.1745	Ssa06017922,Tyrosine decarboxylase,Pyridoxal_deC
Ssa12007325	0.512	0.643	0.15	0.435	45.42	43.099	70.986	53.1683	122.226	6.93341	0	0	0.132	0.044	0.101149	10.2388	Ssa12007325,-,-
Ssa07019883	2.667	3.155	4.357	3.393	446.285	368.472	412.726	409.161	120.59	6.91396	38.367	33.039	6.997	26.1343	7.70243	3.96865	Ssa07019883,Secoisolariciresinol dehydrogenase-like,adh_short_C2
Ssa06018478	0.077	0.058	0.068	0.0676667	6.461	4.86	12.712	8.011	118.389	6.88739	0	0	0	0	0	#DIV/0!	Ssa06018478,ethylene-responsive transcription factor,AP2
Ssa04014484	0.536	0.293	0.428	0.419	50.254	46.321	46.111	47.562	113.513	6.82672	1012.12	1112.11	855.951	993.392	2370.86	-4.38448	Ssa04014484,Belongs to the FBPase class 1 family,FBPase
Ssa09025261	0	0.217	0	0.0723333	4.606	6.788	13.185	8.193	113.267	6.82359	0	0	0	0	0	#DIV/0!	Ssa09025261,-,-
Ssa04014516	0	0	0.694	0.231333	9.843	38.857	28.425	25.7083	111.131	6.79612	0	29.871	0	9.957	43.0418	1.36845	Ssa04014516,-,-
Ssa06019349	0.279	0.047	0.082	0.136	18.628	15.055	11.314	14.999	110.287	6.78512	0	0.024	0.024	0.016	0.117647	9.87258	Ssa06019349,Sulfate transporter,"STAS,Sulfate_transp"
Ssa10004272	0	0	0.245	0.0816667	15.927	8.052	2.444	8.80767	107.849	6.75287	0	0	0.024	0.008	0.0979592	10.1045	Ssa10004272,Sulfate transporter,"STAS,Sulfate_transp"
Ssa05015844	0.051	0	0.626	0.225667	33.87	26.081	11.384	23.7783	105.369	6.71931	0	0	0	0	0	#DIV/0!	Ssa05015844,Polygalacturonase-like,Glyco_hydro_28
Ssa12006876	0.11	0.499	0.802	0.470333	48.851	63.606	30.767	47.7413	101.505	6.66541	6.904	8.287	3.134	6.10833	12.9872	2.96639	Ssa12006876,Belongs to the glycosyltransferase 2 family,Cellulose_synt
Ssa06018178	0.176	0.331	0	0.169	14.32	28.641	8.271	17.0773	101.049	6.65892	16.425	14.02	8.621	13.022	77.0533	0.391132	Ssa06018178,"Transcriptional repressor, ovate",Ovate
Ssa06018072	0	0	0.037	0.0123333	2.365	0.602	0.577	1.18133	95.7838	6.58171	2.537	2.339	1.797	2.22433	180.351	-0.912957	Ssa06018072,Belongs to the UDP-glycosyltransferase family,UDPGT
Ssa03012909	0.031	0.047	0.027	0.035	3.863	2.837	3.069	3.25633	93.0381	6.53975	0	0.024	0	0.008	0.228571	8.66903	Ssa03012909,Myosin heavy chain-related,KIP1
Ssa09025930	3.904	11.464	48.43	21.266	869.082	2673.43	2326.51	1956.34	91.9939	6.52347	16.645	42.397	10.394	23.1453	1.08837	6.40129	Ssa09025930,Gibberellin-regulated protein,GASA
Ssa09025096	0.112	0.289	0.552	0.317667	29.369	20.995	36.897	29.087	91.5645	6.51672	0.048	0.044	0.051	0.0476667	0.150052	9.25318	Ssa09025096,glutamate synthase,"Fer4_20,GATase_2,GXGXG,Glu_syn_central,Glu_synthase,Pyr_redox_2"
Ssa03012652	1.07	0.372	1.376	0.939333	0.533	254.46	0	84.9977	90.4872	6.49964	0	0	0	0	0	#DIV/0!	Ssa03012652,Belongs to the expansin family,"DPBB_1,Pollen_allerg_1"
Ssa08023460	0.041	0.092	0.107	0.08	5.969	9.727	5.68	7.12533	89.0667	6.47681	22.257	25.526	28.063	25.282	316.025	-1.82708	Ssa08023460,Cytochrome p450,p450
Ssa05016439	0	0	0.154	0.0513333	3.889	4.753	4.96	4.534	88.3247	6.46474	0	0	0	0	0	#DIV/0!	Ssa05016439,-,-
Ssa04015267	0.158	0	0.07	0.076	2.635	4.294	13.19	6.70633	88.2412	6.46338	0.233	0.124	0.061	0.139333	1.83333	5.58891	Ssa04015267,Zinc finger C-x8-C-x5-C-x3-H type (and similar),zf-CCCH
Ssa12007767	0	0	0.05	0.0166667	3.142	0.41	0.847	1.46633	87.98	6.4591	0.042	0.354	0.218	0.204667	12.28	2.84087	Ssa12007767,Salicylate,Methyltransf_7
Ssa03012509	0.61	0.765	0.238	0.537667	39.608	57.818	39.091	45.5057	84.6355	6.40319	0	0	0	0	0	#DIV/0!	Ssa03012509,Indole-3-acetic acid-amido synthetase,GH3
Ssa07021304	5.153	0.705	3.606	3.15467	269.039	344.582	167.114	260.245	82.4952	6.36624	0.258	0.275	0.09	0.207667	0.0658284	10.2914	Ssa07021304,Group 2 truncated hemoglobin,Bac_globin
Ssa09024378	55.914	69.275	42.551	55.9133	5358.46	2930.04	5457.31	4581.94	81.9472	6.35662	219.232	216.635	147.306	194.391	3.47665	4.55892	Ssa09024378,Asparagine synthetase,"Asn_synthase,GATase_7"
Ssa11006105	0.25	0.188	1.495	0.644333	37.06	80.66	40.565	52.7617	81.8857	6.35554	0.037	0.078	0.077	0.064	0.0993275	9.6872	Ssa11006105,Phosphoribulokinase,PRK
Ssa09023966	3.112	11.15	15.011	9.75767	944.567	691.024	731.522	789.038	80.8634	6.33741	0	1.593	0	0.531	0.0544187	10.5372	Ssa09023966,-,-
Ssa08022567	0.441	0.213	4.875	1.843	29.383	294.29	104.428	142.7	77.4283	6.27479	0.625	0.64	0.486	0.583667	0.316694	7.93363	Ssa08022567,Aminotransferase class-V,Aminotran_5
Ssa10003365	0	0.262	0.917	0.393	20.082	16.181	54.652	30.305	77.112	6.26888	115.299	142.22	145.301	134.273	341.662	-2.14755	Ssa10003365,Adipocyte plasma membrane-associated,Str_synth
Ssa07020465	0	0.043	0.404	0.149	11.019	11.268	12.176	11.4877	77.0984	6.26863	0	0	0	0	0	#DIV/0!	Ssa07020465,Pectinesterase,Pectinesterase
Ssa04014778	2.432	1.046	0.306	1.26133	83.704	133.217	74.416	97.1123	76.9918	6.26663	0	0	0	0	0	#DIV/0!	Ssa04014778,-,-
Ssa12006696	0.558	1.239	1.423	1.07333	86.097	88.752	72.502	82.4503	76.8171	6.26336	2.439	1.678	2.862	2.32633	2.16739	5.1474	Ssa12006696,Protein ENHANCED DISEASE RESISTANCE,"DUF1336,PH,START"
Ssa09024932	16.629	6.406	89.821	37.6187	2864.33	3777.41	1897.59	2846.45	75.6658	6.24157	0	0	0.448	0.149333	0.00396966	14.2183	Ssa09024932,Hypoxia induced protein conserved region,HIG_1_N
Ssa09025675	0.028	0	0.024	0.0173333	1.591	0.978	1.319	1.296	74.7692	6.22437	0.02	0	0	0.00666667	0.384615	7.60288	Ssa09025675,pumilio homolog,PUF
Ssa01001383	3.383	2.547	1.751	2.56033	184.333	168.275	221.319	191.309	74.7203	6.22343	4.096	7.463	2.764	4.77433	1.86473	5.32446	Ssa01001383,-,-
Ssa03012350	0	0	0.165	0.055	5.67	4.063	2.35	4.02767	73.2303	6.19437	0	0.073	0	0.0243333	0.442424	7.37087	Ssa03012350,-,-
Ssa03013463	0	0.029	0.034	0.021	1.784	2.573	0.25	1.53567	73.127	6.19233	39.156	37.841	46.037	41.0113	1952.92	-4.73909	Ssa03013463,Transcription factor,HLH
Ssa13008851	0	0.029	0.034	0.021	1.748	2.608	0.25	1.53533	73.1111	6.19202	39.214	37.659	46.097	40.99	1951.9	-4.73865	Ssa13008851,Transcription factor,HLH
Ssa04015511	0.907	2.018	2.323	1.74933	142.895	153.325	85.782	127.334	72.79	6.18567	1.941	1.263	0.882	1.362	0.778582	6.54675	Ssa04015511,ankyrin repeat-containing protein,"Ank,Ank_2,Ank_3,Ank_4,PGG"
Ssa06018400	0.69	0.2	1.401	0.763667	80.178	50.713	32.649	54.5133	71.3837	6.15752	0.273	0.539	0.901	0.571	0.747708	6.57697	Ssa06018400,WAT1-related protein,EamA
Ssa03013206	0.296	0.732	1.301	0.776333	45.89	73.882	44.473	54.7483	70.5217	6.14	0	0	0	0	0	#DIV/0!	Ssa03013206,Belongs to the multi antimicrobial extrusion (MATE) (TC 2.A.66.1) family,MatE
Ssa04014538	0.031	0.161	0.189	0.127	11.732	5.071	9.345	8.716	68.6299	6.10077	0.901	0.311	0.426	0.546	4.29921	3.99669	Ssa04014538,L-type lectin-domain containing receptor kinase,"Lectin_legB,Pkinase,Pkinase_Tyr"
Ssa11005134	0.392	0.36	0.727	0.493	14.671	81.981	4.58	33.744	68.4462	6.0969	0	0	0	0	0	#DIV/0!	Ssa11005134,1-aminocyclopropane-1-carboxylate synthase,Aminotran_1_2
Ssa06019320	0.042	0.032	0.996	0.356667	8.665	9.667	54.006	24.1127	67.6056	6.07907	0	0	0	0	0	#DIV/0!	Ssa06019320,Belongs to the UDP-glycosyltransferase family,UDPGT
Ssa06019554	0	0	0.035	0.0116667	0	2.344	0	0.781333	66.9714	6.06547	0	0	0	0	0	#DIV/0!	Ssa06019554,Acts in the modification of cell walls via demethylesterification of cell wall pectin,"PMEI,Pectinesterase"
Ssa05016446	0	0.14	0.164	0.101333	5.515	13.145	1.493	6.71767	66.2928	6.05078	0	0	0	0	0	#DIV/0!	Ssa05016446,-,-
Ssa12006562	0.762	0.574	1.676	1.004	61.595	109.639	28.288	66.5073	66.2424	6.04968	0.224	0.238	0.353	0.271667	0.270584	7.93553	Ssa12006562,Belongs to the sterol desaturase family,FA_hydroxylase
Ssa09024795	0.741	1.302	1.738	1.26033	91.592	56.729	92.869	80.3967	63.79	5.99526	0	0	0	0	0	#DIV/0!	Ssa09024795,-,-
Ssa10004178	0	0	0.17	0.0566667	4.829	4.022	1.963	3.60467	63.6118	5.99122	0	0	0	0	0	#DIV/0!	Ssa10004178,Vinorine synthase-like,Transferase
Ssa01000035	0	0	0.049	0.0163333	1.61	1.067	0.39	1.02233	62.5918	5.9679	0	0	0	0	0	#DIV/0!	Ssa01000035,Belongs to the 'GDSL' lipolytic enzyme family,Lipase_GDSL
Ssa01001415	0.938	0.672	0.589	0.733	50.596	48.221	35.447	44.7547	61.0568	5.93208	4.661	4.466	2.378	3.835	5.23192	3.54474	Ssa01001415,Patellin-4-like,"CRAL_TRIO,CRAL_TRIO_N"
Ssa01001079	0.546	0.235	0.274	0.351667	20.544	26.361	16.944	21.283	60.5204	5.91935	0.974	0.792	1.083	0.949667	2.70047	4.48614	Ssa01001079,B3 domain-containing protein,B3
Ssa12006974	7.6	1.907	10.131	6.546	187.022	417.402	576.977	393.8	60.1589	5.91071	4.232	4.498	4.798	4.50933	0.688869	6.44841	Ssa12006974,Wound-induced protein,DUF3774
Ssa11005505	0.086	0.258	0.489	0.277667	17.236	17.338	14.652	16.4087	59.0948	5.88496	0.252	0.568	0.165	0.328333	1.18247	5.64315	Ssa11005505,Belongs to the multi antimicrobial extrusion (MATE) (TC 2.A.66.1) family,MatE
Ssa02009642	0.321	0.403	0.33	0.351333	15.295	23.716	23.213	20.7413	59.0361	5.88352	0.708	1.087	2.271	1.35533	3.85769	3.93579	Ssa02009642,Belongs to the iron ascorbate-dependent oxidoreductase family,"2OG-FeII_Oxy,DIOX_N"
Ssa07021443	0.084	0.504	1.546	0.711333	4.14	114.326	7.374	41.9467	58.9691	5.88189	0	0	0	0	0	#DIV/0!	Ssa07021443,PCO_ADO,PCO_ADO
Ssa08021919	0	0	0.419	0.139667	6.466	11.065	7.13	8.22033	58.8568	5.87914	0	0.372	0.245	0.205667	1.47255	5.32082	Ssa08021919,PAN-like domain,"B_lectin,DUF3403,PAN_2,Pkinase,Pkinase_Tyr,S_locus_glycop"
Ssa11005599	0.972	0.945	2.103	1.34	96.775	62.756	76.362	78.631	58.6799	5.87479	0	0	0.031	0.0103333	0.00771144	12.8936	Ssa11005599,transcription factor,"DOG1,bZIP_1,bZIP_2"
Ssa13008572	0	1.242	4.56	1.934	127.802	161.509	44.677	111.329	57.5643	5.8471	0	0	0	0	0	#DIV/0!	Ssa13008572,-,-
Ssa05017373	4.787	5.074	9.037	6.29933	403.51	290.712	393.147	362.456	57.5388	5.84646	1.537	2.07	0.897	1.50133	0.238332	7.91542	Ssa05017373,Heparan-alpha-glucosaminide N-acetyltransferase-like,DUF1624
Ssa03013747	0	1.064	5.182	2.082	131.18	163.213	63.555	119.316	57.3084	5.84067	0	0	0	0	0	#DIV/0!	Ssa03013747,-,-
Ssa02010030	0.393	0.247	0.288	0.309333	12.659	17.294	23.122	17.6917	57.1929	5.83776	0.096	0	0.253	0.116333	0.376078	7.24866	Ssa02010030,Protein FANTASTIC FOUR,FAF
Ssa12007981	7.52	4.33	5.578	5.80933	287.164	390.217	309.96	329.114	56.6526	5.82407	3.685	3.456	3.414	3.51833	0.605635	6.54755	Ssa12007981,auxin-induced protein,Auxin_inducible
Ssa12007113	0	0	0.287	0.0956667	0.084	15.88	0.155	5.373	56.1638	5.81157	0	0	0	0	0	#DIV/0!	Ssa12007113,synthase,"Terpene_synth,Terpene_synth_C"
Ssa04014909	2.484	2.104	1.913	2.167	171.841	60.948	127.656	120.148	55.4445	5.79297	60.381	83.706	72.973	72.3533	33.3887	0.731685	Ssa04014909,BEST Arabidopsis thaliana protein match is,-
Ssa03013918	5.183	3.814	8.187	5.728	299.785	293.614	344.265	312.555	54.5661	5.76993	0	0	0	0	0	#DIV/0!	Ssa03013918,basic region leucin zipper,bZIP_1
Ssa11005190	0	0.312	0.182	0.164667	7.564	13.107	6.193	8.95467	54.3806	5.76502	0	0	0	0	0	#DIV/0!	Ssa11005190,invertase,PMEI
Ssa12007513	0.123	0.231	0.108	0.154	0.114	13.32	11.441	8.29167	53.842	5.75066	39.246	45.691	43.567	42.8347	278.147	-2.36904	Ssa12007513,P-loop nucleoside triphosphate hydrolase superfamily protein,AIG1
Ssa06019556	0	0	0.174	0.058	0	9.358	0	3.11933	53.7816	5.74904	0	0	0.031	0.0103333	0.178161	8.23779	Ssa06019556,Acts in the modification of cell walls via demethylesterification of cell wall pectin,"PMEI,Pectinesterase"
Ssa09025635	0.651	0.245	0.572	0.489333	0.301	22.951	55.267	26.173	53.4871	5.74112	35.634	32.789	34.144	34.189	69.8685	-0.385453	Ssa09025635,Bet1-like protein,-
Ssa02011808	0	0.151	0.265	0.138667	9.2	8.36	4.616	7.392	53.3077	5.73627	0.443	0.549	0.155	0.382333	2.75721	4.27306	Ssa02011808,Early nodulin-like protein,Cu_bind_like
Ssa08023643	38.482	5.827	8.096	17.4683	577.537	1053.6	1123.62	918.251	52.5666	5.71607	0.615	1.797	0.323	0.911667	0.0521897	9.97617	Ssa08023643,-,-
Ssa04015637	0.332	0.75	1.679	0.920333	50.292	61.053	33.335	48.2267	52.4013	5.71153	2.226	1.426	2.561	2.071	2.25027	4.54143	Ssa04015637,B3 DNA binding domain,B3
Ssa07021251	0.999	0.981	1.07	1.01667	16.548	55.062	87.244	52.9513	52.0833	5.70275	1.341	1.527	0.804	1.224	1.20393	5.43499	Ssa07021251,Molybdate transporter,MFS_MOT1
Ssa08023115	0.259	0.781	0.571	0.537	18.838	15.487	48.855	27.7267	51.6325	5.69021	4.863	8.716	10.912	8.16367	15.2024	1.76399	Ssa08023115,-,-
Ssa02010475	0.289	0.109	0.381	0.259667	1.001	17.101	21.513	13.205	50.8537	5.66828	111.727	110.176	51.126	91.0097	350.487	-2.78494	Ssa02010475,-,-
Ssa06017883	0.444	0.096	0.279	0.273	14.673	7.116	19.796	13.8617	50.7753	5.66606	0	0	0	0	0	#DIV/0!	Ssa06017883,RING-H2 finger protein,zf-RING_2
Ssa01002708	0	0	0.036	0.012	0.188	0.59	1.045	0.607667	50.6389	5.66217	0	0	0	0	0	#DIV/0!	Ssa01002708,Cation transport protein,TrkH
Ssa08022341	0	0	0.415	0.138333	5.066	11.08	4.845	6.997	50.5807	5.66052	0	0	0	0	0	#DIV/0!	Ssa08022341,acyl-CoA--sterol O-acyltransferase 1-like,MBOAT_2
Ssa02010820	0.038	0.029	0	0.0223333	1.733	0.83	0.797	1.12	50.1493	5.64816	0	0	0	0	0	#DIV/0!	Ssa02010820,lipid transport,"C2,SMP_LBD"
Ssa08022251	0.174	0	0	0.058	0.08	3.299	5.289	2.88933	49.8161	5.63854	9.321	13.571	9.115	10.669	183.948	-1.88462	Ssa08022251,-,-
Ssa03014052	1.021	0.769	2.182	1.324	79.913	72.962	43.874	65.583	49.534	5.63035	0	0	0	0	0	#DIV/0!	Ssa03014052,Lipid phosphate phosphatase,PAP2
Ssa03012508	0.1	0.151	0.176	0.142333	3.93	4.34	12.872	7.04733	49.5129	5.62973	0	0.078	0.154	0.0773333	0.543326	6.50984	Ssa03012508,ZINC FINGER protein,-
Ssa02011269	0	0	0.415	0.138333	4.794	10.973	4.719	6.82867	49.3639	5.62538	0	0	0	0	0	#DIV/0!	Ssa02011269,acyl-CoA--sterol O-acyltransferase 1-like,MBOAT_2
Ssa01000332	0	0.07	0.163	0.0776667	3.946	6.543	0.743	3.744	48.206	5.59114	0	0	0	0	0	#DIV/0!	Ssa01000332,Plant invertase/pectin methylesterase inhibitor,PMEI
Ssa03013170	0.777	0.877	0.494	0.716	49.969	25.172	28.053	34.398	48.0419	5.58622	14.337	16.991	7.625	12.9843	18.1345	1.40555	Ssa03013170,Belongs to the UDP-glycosyltransferase family,UDPGT
Ssa08021984	0.313	0.118	0	0.143667	1.375	0.849	18.471	6.89833	48.0162	5.58545	0	0	0.121	0.0403333	0.280742	7.41813	Ssa08021984,-,-
Ssa02011634	0.313	0.118	0	0.143667	1.375	0.849	18.388	6.87067	47.8237	5.57965	0	0	0.121	0.0403333	0.280742	7.41233	Ssa02011634,-,-
Ssa07020818	7.591	3.811	24.043	11.815	601.853	718.034	362.873	560.92	47.4752	5.5691	0	0	0.098	0.0326667	0.00276485	14.0677	Ssa07020818,-,-
Ssa10003402	0	0.03	0.173	0.0676667	4.958	2.638	1.979	3.19167	47.1675	5.55972	0.058	0.616	0.03	0.234667	3.46798	3.76563	Ssa10003402,pectinesterase pectinesterase inhibitor,"PMEI,Pectinesterase"
Ssa07021626	1.768	2.784	3.394	2.64867	45.313	102.428	225.593	124.445	46.9839	5.55409	1.477	0.565	4.9	2.314	0.873647	5.74897	Ssa07021626,Mediates both low-affinity uptake and efflux of sugar across the membrane,MtN3_slv
Ssa02010602	0.527	0.05	0.058	0.211667	12.801	9.537	7.393	9.91033	46.8205	5.54907	0	0	0	0	0	#DIV/0!	Ssa02010602,Polysaccharide biosynthesis,Polysacc_synt_4
Ssa09024976	5.751	2.443	33.34	13.8447	315.839	926.598	697.903	646.78	46.7169	5.54587	0.325	0.23	0.171	0.242	0.0174797	11.3841	Ssa09024976,Transport and Golgi organization 2 homolog,TANGO2
Ssa05017329	0.223	0	0	0.0743333	2.37	0.403	7.617	3.46333	46.5919	5.54201	69.274	59.528	57.25	62.0173	834.314	-4.16244	Ssa05017329,auxin-induced protein,Auxin_inducible
Ssa02011701	0	0	0.141	0.047	2.215	2.662	1.572	2.14967	45.7376	5.51531	0.039	0.125	0.062	0.0753333	1.60284	4.83468	Ssa02011701,serine threonine-protein kinase,"B_lectin,DUF3403,PAN_2,Pkinase,Pkinase_Tyr,S_locus_glycop"
Ssa04014715	0.044	0.066	0.155	0.0883333	1.383	2.267	8.458	4.036	45.6906	5.51382	1.035	0.584	0.238	0.619	7.00755	2.70491	Ssa04014715,UDP-glycosyltransferase,UDPGT
Ssa05015908	0.618	2.585	1.994	1.73233	61.748	86.321	88.308	78.7923	45.4834	5.50727	23.42	29.532	24.507	25.8197	14.9046	1.60958	Ssa05015908,cationic amino acid transporter,"AA_permease_2,AA_permease_C"
Ssa01000725	5.303	0.917	28.625	11.615	287.748	881.559	392.366	520.558	44.8177	5.486	0	0	0	0	0	#DIV/0!	Ssa01000725,2-aminoethanethiol,PCO_ADO
Ssa08023408	1.626	2.842	3.167	2.545	114.016	124.615	102.512	113.714	44.6815	5.4816	0.043	1.724	0.045	0.604	0.237328	7.55665	Ssa08023408,serine threonine-protein kinase,Pkinase_Tyr
Ssa01002229	0	0	0.118	0.0393333	3.903	1.09	0.215	1.736	44.1356	5.46387	0	0	0	0	0	#DIV/0!	Ssa01002229,DUF21 domain-containing protein,DUF21
Ssa05016096	0.179	0.108	0.315	0.200667	11.65	6.028	8.748	8.80867	43.897	5.45605	0.817	1.148	1.051	1.00533	5.00997	3.13125	Ssa05016096,XS zinc finger domain,"XS,zf-XS"
Ssa12006616	0.271	0.146	0.408	0.275	15.256	10.388	10.557	12.067	43.88	5.45549	158.627	153.577	95.349	135.851	494.004	-3.49289	Ssa12006616,riboflavin biosynthesis protein,"DHBP_synthase,GTP_cyclohydro2"
Ssa09023937	0.068	0.461	1.018	0.515667	22.579	33.811	11.276	22.5553	43.7401	5.45089	8.71	9.629	10.825	9.72133	18.852	1.21424	Ssa09023937,Non-specific lipid transfer protein GPI-anchored,LTP_2
Ssa08022854	0.079	0.03	0.243	0.117333	3.342	8.501	3.101	4.98133	42.4545	5.40785	0.319	0.555	0.518	0.464	3.95455	3.42434	Ssa08022854,receptor-like protein kinase,"GUB_WAK_bind,Pkinase,Pkinase_Tyr"
Ssa06017682	0	0.157	0	0.0523333	2.225	2.648	1.788	2.22033	42.4268	5.4069	0	0	0	0	0	#DIV/0!	Ssa06017682,-,-
Ssa07019854	0.241	0.227	1.379	0.615667	6.858	66.08	4.669	25.869	42.0179	5.39293	0	0	0.047	0.0156667	0.0254467	10.6893	Ssa07019854,Belongs to the glycosyl hydrolase 17 family,Glyco_hydro_17
Ssa03013287	2.592	2.589	3.095	2.75867	154.207	109.765	72.617	112.196	40.6705	5.34591	0	0	0	0	0	#DIV/0!	Ssa03013287,Potassium transporter,K_trans
Ssa11005176	0.035	0	0.03	0.0216667	1.521	0.939	0.166	0.875333	40.4	5.33628	0	3.679	0	1.22633	56.6	-0.486447	Ssa11005176,Protein NRT1 PTR FAMILY,PTR2
Ssa06019688	0.77	0.362	0.169	0.433667	0	51.783	0.771	17.518	40.3951	5.33611	0	0	0	0	0	#DIV/0!	Ssa06019688,Soybean trypsin inhibitor (Kunitz) family of protease inhibitors,Kunitz_legume
Ssa12007228	32.374	34.955	43.265	36.8647	1208.61	1075.29	2153.59	1479.17	40.1243	5.3264	45.466	35.026	59.299	46.597	1.264	4.9884	Ssa12007228,Stem-specific protein,DUF3700
Ssa01002795	0.275	2.693	4.296	2.42133	21.057	211.375	56.656	96.3627	39.7974	5.3146	0.101	0	0	0.0336667	0.0139042	11.4829	Ssa01002795,Belongs to the glycosyl hydrolase 18 family,Glyco_hydro_18
Ssa08022694	8.221	5.041	5.631	6.29767	246.551	176.809	324.816	249.392	39.6007	5.30745	32.281	35.155	37.041	34.8257	5.52993	2.84019	Ssa08022694,PDDEXK-like family of unknown function,PDDEXK_6
Ssa08023755	0	0.102	0	0.034	2.511	0.982	0.508	1.33367	39.2255	5.29372	0.499	1.485	1.781	1.255	36.9118	0.0877108	Ssa08023755,"3,4-dihydroxy-2-butanone 4-phosphate synthase","DHBP_synthase,GTP_cyclohydro2"
Ssa02010456	2.231	1.75	2.535	2.172	121.377	74.527	53.876	83.26	38.3333	5.26053	0.205	0.254	0.179	0.212667	0.0979128	8.61289	Ssa02010456,Endonuclease Exonuclease phosphatase family protein,"Exo_endo_phos,zf-RanBP"
Ssa13009193	1.859	0.764	0.93	1.18433	38.033	48.006	49.824	45.2877	38.239	5.25697	0	0.066	0.13	0.0653333	0.0551646	9.43708	Ssa13009193,Belongs to the class-III pyridoxal-phosphate-dependent aminotransferase family,Aminotran_3
Ssa08022464	0.169	0.255	0.595	0.339667	13.231	16.588	9.143	12.9873	38.2355	5.25684	0	0.033	0.098	0.0436667	0.128557	8.21636	Ssa08022464,Protein ZINC INDUCED,MFS_1
Ssa10003675	0	0.069	0	0.023	1.658	0.831	0.098	0.862333	37.4928	5.22854	0	0.144	0	0.048	2.08696	4.16714	Ssa10003675,Auxin-binding protein,Cupin_1
Ssa09025038	0.059	0	0	0.0196667	1.562	0.268	0.38	0.736667	37.4576	5.22719	0	0	0	0	0	#DIV/0!	Ssa09025038,6-phosphogluconolactonase 4,Glucosamine_iso
Ssa02010359	0.566	0	0.05	0.205333	5.996	9.166	7.713	7.625	37.1347	5.2147	28514.8	29746.1	35240.8	31167.3	151789	-11.997	Ssa02010359,"RuBisCO catalyzes two reactions the carboxylation of D- ribulose 1,5-bisphosphate, the primary event in carbon dioxide fixation, as well as the oxidative fragmentation of the pentose substrate. Both reactions occur simultaneously and in competition at the same active site","RbcS,RuBisCO_small"
Ssa08022937	0.418	0.079	0.184	0.227	11.317	11.444	2.514	8.425	37.1145	5.21391	0	0	0	0	0	#DIV/0!	Ssa08022937,Domain of unknown function (DUF4228),DUF4228
Ssa11006456	0	0.022	0	0.00733333	0.466	0.268	0.079	0.271	36.9545	5.20768	0	0	0	0	0	#DIV/0!	Ssa11006456,metal-nicotianamine transporter,OPT
Ssa02009620	13.961	24.454	39.027	25.814	434.428	1012.21	1396.66	947.767	36.7152	5.19831	0.218	0.309	1.757	0.761333	0.029493	10.2818	Ssa02009620,PAR1 protein,PAR1
Ssa05016800	0.08	0.41	0.035	0.175	0.086	11.122	8.029	6.41233	36.6419	5.19542	3.686	3.12	6.941	4.58233	26.1848	0.484767	Ssa05016800,Toll - interleukin 1 - resistance,"NB-ARC,RNase_H,RVT_1,RVT_3,TIR,zf-RVT"
Ssa13008682	0.211	0.159	0.093	0.154333	6.303	4.873	5.192	5.456	35.3521	5.14372	0	0.083	0	0.0276667	0.179266	7.62355	Ssa13008682,transcription factor,AP2
Ssa01001149	0.171	0.258	2.11	0.846333	52.385	13.993	23.179	29.8523	35.2725	5.14047	0	0	0	0	0	#DIV/0!	Ssa01001149,fructose-bisphosphate aldolase,Glycolytic
Ssa10004842	1.604	4.962	6.812	4.45933	216.984	179.345	75.519	157.283	35.2704	5.14039	0.037	0.117	0	0.0513333	0.0115114	11.5812	Ssa10004842,Respiratory burst oxidase homolog protein,"FAD_binding_8,Ferric_reduct,NADPH_Ox,NAD_binding_6"
Ssa03013636	0.211	0.159	0.093	0.154333	6.254	4.873	5.192	5.43967	35.2462	5.1394	0	0.083	0	0.0276667	0.179266	7.61923	Ssa03013636,transcription factor,AP2
Ssa12006900	5.898	4.219	6.681	5.59933	76.684	159.034	354.544	196.754	35.1388	5.13499	0.867	1.094	1.878	1.27967	0.228539	7.26448	Ssa12006900,Septum-promoting GTP-binding protein,"Ras,Roc"
Ssa05017191	0.065	0.147	0.114	0.108667	2.522	5.52	3.399	3.81367	35.0951	5.1332	23.96	25.567	20.193	23.24	213.865	-2.60736	Ssa05017191,La-related protein,La
Ssa02011515	0.704	1.187	0.767	0.886	7.602	1.79	83.829	31.0737	35.0719	5.13224	0.395	0.524	0.518	0.479	0.540632	6.01952	Ssa02011515,9-cis-epoxycarotenoid dioxygenase,RPE65
Ssa12007395	6.242	5.64	5.95	5.944	156.138	205.322	261.276	207.579	34.9224	5.12608	58.049	65.029	32.035	51.7043	8.69858	2.0053	Ssa12007395,"Gamma-glutamyl cyclotransferase, AIG2-like",GGACT
Ssa11005619	0.339	0.383	0.149	0.290333	5.64	14.707	9.773	10.04	34.5809	5.11191	24.157	21.836	19.608	21.867	75.3169	-1.123	Ssa11005619,Belongs to the cytochrome P450 family,p450
Ssa02011142	0.169	0.255	0.781	0.401667	15.987	16.664	8.985	13.8787	34.5527	5.11073	0	0.033	0.098	0.0436667	0.108714	8.31212	Ssa02011142,Protein ZINC INDUCED,MFS_1
Ssa08022098	0.704	1.212	0.767	0.894333	7.524	1.669	83.417	30.87	34.5173	5.10925	0.419	0.524	0.518	0.487	0.54454	5.98614	Ssa08022098,9-cis-epoxycarotenoid dioxygenase,RPE65
Ssa06018073	0.288	0.619	0.614	0.507	32.198	13.374	5.88	17.1507	33.8277	5.08014	474.314	503.633	521.037	499.661	985.525	-4.86461	Ssa06018073,Belongs to the UDP-glycosyltransferase family,UDPGT
Ssa07020712	28.81	34.908	9.854	24.524	866.694	883.159	722.359	824.071	33.6026	5.0705	24.446	29.997	17.198	23.8803	0.973754	5.10887	Ssa07020712,glutamine synthetase,"Gln-synt_C,Gln-synt_N"
Ssa09024284	0.146	0.396	0.232	0.258	10.939	8.013	6.826	8.59267	33.3049	5.05766	60.611	53.842	39.599	51.3507	199.034	-2.57921	Ssa09024284,ABC transporter G family member,"ABC2_membrane,ABC_tran"
Ssa01002080	3.646	4.451	2.625	3.574	113.951	78.796	160.989	117.912	32.9916	5.04403	0	0	0	0	0	#DIV/0!	Ssa01002080,Belongs to the protein kinase superfamily,"Pkinase,Pkinase_Tyr"
Ssa11005764	1.005	0	11.491	4.16533	1.673	410.183	0.107	137.321	32.9676	5.04298	0	0	0	0	0	#DIV/0!	Ssa11005764,lipid-transfer protein,LTP_2
Ssa02010509	0.216	1.137	0.488	0.613667	20.041	22.078	18.391	20.17	32.868	5.03861	0.612	0.217	0.285	0.371333	0.605106	5.76335	Ssa02010509,Cysteine-rich receptor-like protein kinase,"Pkinase_Tyr,Stress-antifung"
Ssa04015091	0	0	0.196	0.0653333	1.597	1.209	3.63	2.14533	32.8367	5.03724	0	0	0.086	0.0286667	0.438776	6.22568	Ssa04015091,auxin-induced protein,Auxin_inducible
Ssa03013704	0.104	0.078	0	0.0606667	2.489	2.621	0.829	1.97967	32.6319	5.02821	0	0	0.08	0.0266667	0.43956	6.21408	Ssa03013704,-,-
Ssa07019856	0.432	0.604	1.086	0.707333	1.913	40.09	27.241	23.0813	32.6315	5.02819	0.408	0.193	0.81	0.470333	0.664939	5.6169	Ssa07019856,Belongs to the glycosyl hydrolase 17 family,Glyco_hydro_17
Ssa13008492	0.238	0.179	0.21	0.209	2.425	4.419	13.559	6.801	32.5407	5.02417	0	0	0	0	0	#DIV/0!	Ssa13008492,Belongs to the SKP1 family,"Skp1,Skp1_POZ"
Ssa13008615	0.104	0.078	0	0.0606667	2.346	2.528	0.995	1.95633	32.2473	5.0111	0	0	0.08	0.0266667	0.43956	6.19697	Ssa13008615,-,-
Ssa11005385	19.458	25.135	13.011	19.2013	473.106	857.33	524.168	618.201	32.1958	5.0088	206.293	250.132	106.046	187.49	9.76444	1.72126	Ssa11005385,Glutathione S-transferase,"GST_C_2,GST_N"
Ssa01002216	2.296	1.153	1.496	1.64833	41.436	32.19	84.753	52.793	32.0281	5.00127	125.629	120.033	94.573	113.412	68.8038	-1.10315	Ssa01002216,UDP-Glycosyltransferase,UDPGT
Ssa09024712	0	0.021	0.024	0.015	0.657	0.198	0.584	0.479667	31.9778	4.999	0.904	0.662	0.675	0.747	49.8	-0.639076	Ssa09024712,ribosomal protein import into nucleus,-
Ssa10004264	0	0.105	0.031	0.0453333	2.083	1.642	0.597	1.44067	31.7794	4.99002	0.026	0.082	0	0.036	0.794118	5.3226	Ssa10004264,"Type I inositol 1,4,5-trisphosphate 5-phosphatase",Exo_endo_phos
Ssa01002617	0.5	0.125	0.147	0.257333	5.818	15.9	2.359	8.02567	31.1878	4.96291	960.165	798.973	2561.49	1440.21	5596.67	-7.48744	Ssa01002617,"The light-harvesting complex (LHC) functions as a light receptor, it captures and delivers excitation energy to photosystems with which it is closely associated",Chloroa_b-bind
Ssa13009148	0	0	0.029	0.00966667	0.349	0.327	0.228	0.301333	31.1724	4.9622	3.815	3.593	2.256	3.22133	333.241	-3.41823	Ssa13009148,receptor,"PA,cEGF"
Ssa08022970	0.867	1.662	0.347	0.958667	27.051	33.225	29.268	29.848	31.1349	4.96046	65.54	70.582	110.779	82.3003	85.8487	-1.46326	Ssa08022970,-,-
Ssa07019853	0	0.801	0.676	0.492333	0.956	42.15	2.808	15.3047	31.086	4.95819	0	0	0	0	0	#DIV/0!	Ssa07019853,Belongs to the glycosyl hydrolase 17 family,Glyco_hydro_17
Ssa05017054	0.148	0.334	0.325	0.269	11.772	9.034	4.229	8.345	31.0223	4.95523	0.054	0	0	0.018	0.0669145	8.85677	Ssa05017054,Ubiquitin family,ubiquitin
Ssa10003848	0.09	0.068	0	0.0526667	1.065	3.226	0.579	1.62333	30.8228	4.94593	25.023	21.41	22.227	22.8867	434.557	-3.81748	Ssa10003848,RING-H2 finger protein,zf-RING_2
Ssa07021800	1.01	0	0.508	0.506	20.226	8.746	17.58	15.5173	30.6667	4.9386	0	0	0	0	0	#DIV/0!	Ssa07021800,WUSCHEL-related homeobox,Homeobox
Ssa11005859	0.616	0.596	3.25	1.48733	30.552	55.055	50.563	45.39	30.5177	4.93157	1.099	1.237	1.154	1.16333	0.78216	5.28604	Ssa11005859,Glutathione S-transferase,"GST_C,GST_C_2,GST_N,GST_N_3"
Ssa12006563	1.547	1.514	1.905	1.65533	26.076	70.372	53.671	50.0397	30.2294	4.91788	0.227	0.363	0.298	0.296	0.178816	7.40133	Ssa12006563,Tropinone reductase homolog At1g07440-like,"adh_short,adh_short_C2"
Ssa07021142	1.558	0.542	0.738	0.946	27.716	27.969	29.966	28.5503	30.1801	4.91552	0.088	0.281	0.277	0.215333	0.227625	7.05079	Ssa07021142,Protein GLUTAMINE DUMPER,-
Ssa07020601	17.747	52.089	25.502	31.7793	1232.73	621.865	1018.52	957.704	30.1361	4.91342	1.944	1.468	3.652	2.35467	0.0740943	8.66791	Ssa07020601,Asparagine synthetase,"Asn_synthase,GATase_7"
Ssa02011962	0	0.044	0.103	0.049	1.327	1.271	1.783	1.46033	29.8027	4.89737	0	0	0.045	0.015	0.306122	6.60519	Ssa02011962,ABSCISIC ACID-INSENSITIVE 5-like protein,bZIP_1
Ssa01002014	0	0.077	0.09	0.0556667	0	4.912	0.055	1.65567	29.7425	4.89445	0	0	0	0	0	#DIV/0!	Ssa01002014,Soybean trypsin inhibitor (Kunitz) family of protease inhibitors,Kunitz_legume
Ssa11005315	0	0.092	0.161	0.0843333	3.112	2.85	1.536	2.49933	29.6364	4.8893	0.09	0.024	0.094	0.0693333	0.822134	5.17185	Ssa11005315,Belongs to the STXBP unc-18 SEC1 family,Sec1
Ssa07021111	2.124	3.958	4.158	3.41333	113.526	108.342	81.409	101.092	29.6169	4.88835	0.468	0.83	0.656	0.651333	0.19082	7.27806	Ssa07021111,-,-
Ssa08022404	0	0.028	0	0.00933333	0.121	0.507	0.2	0.276	29.5714	4.88613	0	0	0	0	0	#DIV/0!	Ssa08022404,Protein NRT1 PTR FAMILY,PTR2
Ssa05016180	6.992	2.632	3.619	4.41433	132.42	73.467	184.742	130.21	29.497	4.8825	0.353	0.482	0.264	0.366333	0.0829872	8.47346	Ssa05016180,Phosphate-induced protein 1 conserved region,Phi_1
Ssa02010170	1.671	2.225	1.47	1.78867	148.008	8.775	0.721	52.5013	29.3522	4.8754	0	0	0	0	0	#DIV/0!	Ssa02010170,Inositol oxygenase,MIOX
Ssa01001485	0.122	0.87	0.535	0.509	5.4	3.41	35.739	14.8497	29.1742	4.86662	15.022	13.828	14.878	14.576	28.6365	0.0268357	Ssa01001485,Heat Stress Transcription Factor,HSF_DNA-bind
Ssa07019963	0	0	0.116	0.0386667	1.733	0.718	0.918	1.123	29.0431	4.86012	0	0	0	0	0	#DIV/0!	Ssa07019963,alpha-galactosidase,Melibiase_2
Ssa04015218	3.217	1.176	0.566	1.653	54.196	49.627	39.574	47.799	28.9165	4.85382	0	0.072	0.071	0.0476667	0.0288365	9.96978	Ssa04015218,Sterile alpha motif (SAM) domain-containing protein,SAM_2
Ssa01002290	4.693	2.806	17.304	8.26767	72.863	609.983	33.548	238.798	28.8834	4.85217	0	0.108	0.053	0.0536667	0.00649115	12.1195	Ssa01002290,Belongs to the glycosyl hydrolase 18 family,Glyco_hydro_18
Ssa05016767	0	0.061	0.142	0.0676667	2.599	1.901	1.339	1.94633	28.7635	4.84617	0	0	0	0	0	#DIV/0!	Ssa05016767,Solute carrier family 22 member,Sugar_tr
Ssa01001265	0	0.06	0.211	0.0903333	4.221	0.652	2.908	2.59367	28.7122	4.84359	15.655	16.013	12.542	14.7367	163.137	-2.50635	Ssa01001265,-,DUF1685
Ssa06019059	7.535	2.905	2.44	4.29333	105.606	100.101	163.527	123.078	28.6672	4.84133	5.052	5.181	1.442	3.89167	0.906444	4.98304	Ssa06019059,Serine threonine-protein kinase-like protein,"Pkinase,Pkinase_Tyr"
Ssa02011284	2.332	2.001	1.336	1.88967	60.058	53.16	48.662	53.96	28.5553	4.83569	5.58	5.55	4.77	5.3	2.80473	3.34783	Ssa02011284,histone deacetylase,Hist_deacetyl
Ssa02011913	0.159	0.32	0.327	0.268667	5.525	13.495	3.914	7.64467	28.4541	4.83056	6.753	18.585	5.655	10.331	38.4529	-0.434454	Ssa02011913,S-type anion channel,SLAC1
Ssa06019219	67.544	15.433	99.588	60.855	694.762	2896.03	1588.86	1726.55	28.3715	4.82637	77.388	83.706	59.313	73.469	1.20728	4.55461	Ssa06019219,Wound-induced protein,DUF3774
Ssa13008443	0.249	0.141	0.055	0.148333	3.861	6.198	2.563	4.20733	28.364	4.82599	0	0	0	0	0	#DIV/0!	Ssa13008443,Toll - interleukin 1 - resistance,"LRR_3,NB-ARC,TIR"
Ssa02011270	0	0.247	0.144	0.130333	5.005	2.224	3.854	3.69433	28.3453	4.82504	0	0	0	0	0	#DIV/0!	Ssa02011270,acyl-CoA--sterol O-acyltransferase 1-like,MBOAT_2
Ssa08022326	2.386	2.082	1.336	1.93467	60.485	53.503	48.836	54.2747	28.0538	4.81012	5.58	5.507	6.277	5.788	2.99173	3.22914	Ssa08022326,histone deacetylase,Hist_deacetyl
Ssa13009035	0.772	0.931	1.133	0.945333	29.389	12.389	37.661	26.4797	28.0109	4.80792	208.473	208.012	148.79	188.425	199.321	-2.83103	Ssa13009035,Protein of unknown function (DUF760),DUF760
Ssa10003560	0.7	0.888	0.957	0.848333	27.312	25.622	17.969	23.6343	27.8597	4.80011	0.095	0.101	0.142	0.112667	0.132809	7.71268	Ssa10003560,phospholipase,"PLDc,PLDc_2"
Ssa05016171	0.07	0	0	0.0233333	0.291	0.949	0.71	0.65	27.8571	4.79998	0	0	0	0	0	#DIV/0!	Ssa05016171,Tobamovirus multiplication protein 1-like,DUF1084
Ssa01002459	0.377	0.312	0.298	0.329	10.176	8.246	8.936	9.11933	27.7183	4.79277	1.357	1.707	2.559	1.87433	5.69706	2.28255	Ssa01002459,AMP-binding enzyme,"AMP-binding,AMP-binding_C"
Ssa11005156	3.757	3.411	2.673	3.28033	62.699	110.224	99.751	90.8913	27.708	4.79223	680.682	641.353	922.365	748.133	228.066	-3.04108	Ssa11005156,CAAX protease self-immunity,Abi
Ssa03013416	0.166	0.792	0.78	0.579333	22.186	13.477	11.955	15.8727	27.3982	4.77601	20.442	22.202	18.296	20.3133	35.0633	-0.355882	Ssa03013416,At1g28695-like,Nucleotid_trans
Ssa04015030	0.528	0.428	2.428	1.128	25.171	55.392	12.033	30.8653	27.3629	4.77415	0	0	0	0	0	#DIV/0!	Ssa04015030,Cytochrome p450,p450
Ssa10004567	2.069	0.543	1.439	1.35033	36.113	43.993	30.56	36.8887	27.3182	4.77179	0.035	1.053	0.037	0.375	0.277709	6.62014	Ssa10004567,Argininosuccinate synthase,Arginosuc_synth
Ssa09024544	6.489	5.506	8.563	6.85267	173.788	106.939	280.686	187.138	27.3087	4.77129	114.893	131.567	178.516	141.659	20.672	0.401681	Ssa09024544,serine acetyltransferase,"Hexapep,SATase_N"
Ssa09025764	0.349	0.263	0.717	0.443	12.926	9.585	13.749	12.0867	27.2837	4.76997	0	0	0	0	0	#DIV/0!	Ssa09025764,BEST Arabidopsis thaliana protein match is hydroxyproline-rich glycoprotein family protein (TAIR AT1G21695.1),DUF688
Ssa09024734	5.871	2.09	1.878	3.27967	26.363	13.324	227.991	89.226	27.2058	4.76584	286.189	294.411	255.706	278.769	84.9991	-1.64353	Ssa09024734,Nudix hydrolase,NUDIX
Ssa06019601	1.185	1.952	1.809	1.64867	59.768	35.639	39.151	44.8527	27.2054	4.76582	24.416	20.868	22.095	22.4597	13.6229	0.997857	Ssa06019601,Belongs to the glycosyl hydrolase 31 family,"Gal_mutarotas_2,Glyco_hydro_31,NtCtMGAM_N"
Ssa11006330	1.695	2.089	1.254	1.67933	39.626	15.68	81.583	45.6297	27.1713	4.76401	18.522	14.237	10.911	14.5567	8.66812	1.64829	Ssa11006330,Ankyrin repeat-containing protein,"Ank,Ank_2,Ank_4,PGG"
Ssa01000647	14.613	9.86	9.183	11.2187	213.012	385.679	288.426	295.706	26.3584	4.72019	35.714	42.85	26.508	35.024	3.12194	3.07775	Ssa01000647,-,-
Ssa03013615	0	0.076	0.089	0.055	0.516	3.12	0.705	1.447	26.3091	4.71749	0.149	0.238	0.235	0.207333	3.7697	2.80304	Ssa03013615,-,-
Ssa02010790	0.195	0.147	0.343	0.228333	4.062	8.474	5.422	5.986	26.2161	4.71238	0	1.525	0	0.508333	2.22628	3.55775	Ssa02010790,auxin-induced protein,Auxin_inducible
Ssa13008897	0.166	0.834	0.829	0.609667	22.314	13.577	12.044	15.9783	26.2083	4.71195	20.645	22.159	18.168	20.324	33.3362	-0.347067	Ssa13008897,At1g28695-like,Nucleotid_trans
Ssa06018204	2.524	4.571	5.129	4.07467	153.192	115.899	50.7	106.597	26.1609	4.70934	0	0.047	0	0.0156667	0.0038449	12.7322	Ssa06018204,Nuclear transcription factor Y subunit,CBFB_NFYA
Ssa01000576	4.216	5.801	7.801	5.93933	123.629	223.894	117.411	154.978	26.0935	4.70562	0	0	0	0	0	#DIV/0!	Ssa01000576,calcium-binding protein,"EF-hand_1,EF-hand_5,EF-hand_6,EF-hand_7,EF-hand_8"
Ssa10004079	0.04	0.06	0.035	0.045	0.622	1.253	1.606	1.16033	25.7852	4.68847	0	0.216	0	0.072	1.6	4.0104	Ssa10004079,Cytochrome p450,p450
Ssa02010626	4.377	5.258	5.104	4.913	87.479	137.584	153.825	126.296	25.7065	4.68406	113.179	113.912	93.159	106.75	21.7281	0.242573	Ssa02010626,Ferredoxin-nitrite reductase,"NIR_SIR,NIR_SIR_ferr"
Ssa09024791	8.309	4.946	0.696	4.65033	99.474	43.731	215.218	119.474	25.6916	4.68322	9.075	9.707	8.855	9.21233	1.981	3.69699	Ssa09024791,Pollen allergen,"DPBB_1,Pollen_allerg_1"
Ssa08023246	0.436	0.219	0.384	0.346333	7.462	13.673	5.358	8.831	25.4986	4.67234	0	0.114	0.224	0.112667	0.325313	6.29244	Ssa08023246,-,-
Ssa12007227	23.792	37.946	42.075	34.6043	697.649	626.779	1319.81	881.413	25.4712	4.67079	53.118	33.408	74.308	53.6113	1.54927	4.03921	Ssa12007227,Stem-specific protein,DUF3700
Ssa03014021	0	0.101	0.177	0.0926667	1.27	2.241	3.542	2.351	25.3705	4.66508	0	0	0.052	0.0173333	0.18705	7.08358	Ssa03014021,Transcription factor,Myb_DNA-binding
Ssa02010973	0	0.04	0.047	0.029	0.369	0.77	1.052	0.730333	25.1839	4.65443	0	0	0	0	0	#DIV/0!	Ssa02010973,No apical meristem (NAM) protein,NAM
Ssa01001201	0.085	0	0	0.0283333	0.75	0.927	0.456	0.711	25.0941	4.64928	0	0.067	0	0.0223333	0.788235	4.99258	Ssa01001201,Thaumatin family,Thaumatin
Ssa06017529	0.05	0	0.354	0.134667	0.372	9.132	0.617	3.37367	25.052	4.64685	0	0.039	0	0.013	0.0965347	8.01966	Ssa06017529,Serine threonine-protein kinase,"Pkinase,Pkinase_Tyr"
Ssa08022863	0.356	0.134	1.254	0.581333	11.457	22.89	9.33	14.559	25.0442	4.6464	0.131	0.139	0	0.09	0.154817	7.33777	Ssa08022863,receptor-like protein kinase,"GUB_WAK_bind,Pkinase,Pkinase_Tyr"
Ssa03014108	0.315	0.297	0.277	0.296333	10.682	3.351	8.17	7.401	24.9753	4.64243	0	0	0	0	0	#DIV/0!	Ssa03014108,Myb-related protein,Myb_DNA-binding
Ssa08022648	30.282	8.759	16.408	18.483	172.755	690.055	517.268	460.026	24.8891	4.63744	71.804	132.579	66.117	90.1667	4.87836	2.35105	Ssa08022648,"protein At4g14450, chloroplastic-like",-
Ssa06019226	0.146	0.073	0.043	0.0873333	3.047	1.412	2.059	2.17267	24.8779	4.63679	0	0	0	0	0	#DIV/0!	Ssa06019226,zinc finger,-
Ssa12007315	0.111	0.189	0.098	0.132667	9.088	0.655	0.089	3.27733	24.7035	4.62664	37.148	29.05	14.799	26.999	203.51	-3.04231	Ssa12007315,synthase,"Terpene_synth,Terpene_synth_C"
Ssa12007316	0.143	0.268	0.125	0.178667	12.133	0.935	0.114	4.394	24.5933	4.62019	48.292	37.429	18.76	34.827	194.927	-2.9866	Ssa12007316,synthase,"Terpene_synth,Terpene_synth_C"
Ssa12007681	9.378	3.312	3.615	5.435	94.566	73.887	231.298	133.25	24.5171	4.61572	0.426	0.151	0.56	0.379	0.0697332	8.45773	Ssa12007681,WAT1-related protein,EamA
Ssa10003843	80.897	38.933	176.362	98.7307	205.807	6714.01	337.098	2418.97	24.5007	4.61475	0	0	0	0	0	#DIV/0!	Ssa10003843,Rare lipoprotein A (RlpA)-like double-psi beta-barrel,DPBB_1
Ssa06018056	0	0.211	0	0.0703333	0.779	2.285	2.1	1.72133	24.4739	4.61317	1.445	0.877	1.3	1.20733	17.1659	0.511702	Ssa06018056,Protein of unknown function (DUF4050),DUF4050
Ssa04015401	2.797	1.99	2.562	2.44967	89.137	56.825	32.765	59.5757	24.3199	4.60407	0	0.03	0.03	0.02	0.00816438	11.5405	Ssa04015401,6-phosphofructokinase 6-like,PFK
Ssa11005968	0.077	0	0	0.0256667	0.855	0.558	0.453	0.622	24.2338	4.59895	0	0	0	0	0	#DIV/0!	Ssa11005968,GDSL/SGNH-like Acyl-Esterase family found in Pmr5 and Cas1p,"PC-Esterase,PMR5N"
Ssa08022853	0	0	0.024	0.008	0.216	0.248	0.117	0.193667	24.2083	4.59743	0.061	0.021	0.021	0.0343333	4.29167	2.49589	Ssa08022853,receptor-like protein kinase,"GUB_WAK_bind,Pkinase,Pkinase_Tyr"
Ssa10003855	0.225	0.211	0.395	0.277	11.764	5.79	2.55	6.70133	24.1925	4.59649	0	0	0	0	0	#DIV/0!	Ssa10003855,WAT1-related protein,EamA
Ssa01001449	0.582	2.104	0.717	1.13433	40.986	7.373	33.842	27.4003	24.1555	4.59428	0.342	0.364	0.989	0.565	0.49809	5.5998	Ssa01001449,zinc finger,zf-C2H2_6
Ssa13008702	0	0.076	0.089	0.055	0.328	2.937	0.705	1.32333	24.0606	4.5886	0.149	0.238	0.235	0.207333	3.7697	2.67415	Ssa13008702,-,-
Ssa02009458	0.443	0.862	1.137	0.814	35.268	12.325	11.146	19.5797	24.0536	4.58818	0.081	0.029	0.142	0.084	0.103194	7.86475	Ssa02009458,Alkaline neutral invertase,Glyco_hydro_100
Ssa07020717	0.029	0.088	0.026	0.0476667	1.495	1.29	0.653	1.146	24.042	4.58748	0.021	0.023	0	0.0146667	0.307692	6.28792	Ssa07020717,PHD finger protein MALE MEIOCYTE DEATH,PHD
Ssa09024796	2.228	3.019	1.96	2.40233	32.661	65.284	74.501	57.482	23.9276	4.5806	9.007	12.706	11.347	11.02	4.58721	2.38299	Ssa09024796,DVL family,DVL
Ssa06018838	0.539	0.496	0.527	0.520667	19.623	11.057	6.627	12.4357	23.8841	4.57798	0.044	0.14	0.046	0.0766667	0.147247	7.34167	Ssa06018838,Belongs to the iron ascorbate-dependent oxidoreductase family,"2OG-FeII_Oxy,DIOX_N"
Ssa06019789	0.623	0.469	1.261	0.784333	20.687	18.875	16.54	18.7007	23.8428	4.57548	0.229	0.341	0.24	0.27	0.344241	6.11399	Ssa06019789,-,-
Ssa02012036	0.028	0.062	0.169	0.0863333	1.425	1.169	3.527	2.04033	23.6332	4.56274	1.234	1.397	1.529	1.38667	16.0618	0.557184	Ssa02012036,BEL1-like homeodomain protein,"Homeobox_KN,POX"
Ssa02010654	67.446	10.049	21.387	32.9607	17.856	783.524	1535.16	778.846	23.6295	4.56252	8.409	9.31	6.989	8.236	0.249874	6.56325	Ssa02010654,-,-
Ssa11004943	0.077	0	0.102	0.0596667	1.72	0.491	2.008	1.40633	23.5698	4.55887	0.342	0.515	1.166	0.674333	11.3017	1.0604	Ssa11004943,Pentatricopeptide repeat-containing protein,"DYW_deaminase,PPR,PPR_2"
Ssa06019288	11.172	3.45	4.349	6.32367	217.16	82.291	136.176	145.209	22.9628	4.52123	0	0.063	0	0.021	0.00332086	12.7555	Ssa06019288,Belongs to the UDP-glycosyltransferase family,UDPGT
Ssa02009743	16.932	15.701	57.39	30.0077	451.938	1423.18	175.185	683.435	22.7753	4.5094	0	0	0	0	0	#DIV/0!	Ssa02009743,Belongs to the Bowman-Birk serine protease inhibitor family,Bowman-Birk_leg
Ssa06018533	0.92	0.717	0.67	0.769	16.595	14.893	20.983	17.4903	22.7443	4.50743	0	0	0	0	0	#DIV/0!	Ssa06018533,zinc finger,"zf-CCHC,zf-CCHC_2,zf-GRF"
Ssa02010038	2.649	9.029	2.699	4.79233	186.548	20.807	118.13	108.495	22.6393	4.50076	0	0	0	0	0	#DIV/0!	Ssa02010038,PLAC8 family,PLAC8
Ssa02009486	1.557	1.091	2.549	1.73233	79.281	28.854	9.421	39.1853	22.62	4.49953	0	0	0	0	0	#DIV/0!	Ssa02009486,Lignin degradation and detoxification of lignin-derived products,"Cu-oxidase,Cu-oxidase_2,Cu-oxidase_3"
Ssa04014599	0.167	0.031	0.147	0.115	3.726	3.058	0.981	2.58833	22.5072	4.49232	15.619	17.383	5.186	12.7293	110.69	-2.29806	Ssa04014599,Belongs to the UDP-glycosyltransferase family,UDPGT
Ssa03014251	0.118	0.133	0	0.0836667	1.035	2.344	2.234	1.871	22.3625	4.48301	0	0	0	0	0	#DIV/0!	Ssa03014251,Belongs to the iron ascorbate-dependent oxidoreductase family,"2OG-FeII_Oxy,B3,DIOX_N"
Ssa01002740	2.779	1.569	1.987	2.11167	45.226	21.732	74.416	47.1247	22.3163	4.48003	15.365	14.611	15.951	15.309	7.24972	1.6221	Ssa01002740,Hemerythrin HHE cation binding domain,Hemerythrin
Ssa10003845	0.626	0.236	0.413	0.425	0.868	25.754	1.421	9.34767	21.9945	4.45907	0	0	0	0	0	#DIV/0!	Ssa10003845,Rare lipoprotein A (RlpA)-like double-psi beta-barrel,DPBB_1
Ssa01002515	2.046	0.552	0.509	1.03567	23.367	17.315	27.589	22.757	21.9733	4.45768	0	0.06	0	0.02	0.0193112	10.1521	Ssa01002515,Cytokinin hydroxylase-like,p450
Ssa09024342	0	0	0.196	0.0653333	1.339	1.41	1.547	1.432	21.9184	4.45407	92.693	133.676	91.635	106.001	1622.47	-6.20991	Ssa09024342,Thylakoid soluble phosphoprotein TSP9,TSP9
Ssa02010634	7.469	6.574	8.491	7.51133	150.369	183.029	155.4	162.933	21.6916	4.43906	10.579	10.764	13.001	11.448	1.5241	3.83111	Ssa02010634,Plastid division protein,Globin
Ssa09025735	53.47	20.59	37.326	37.1287	485.316	795.183	1121.17	800.556	21.5617	4.4304	0	0	0	0	0	#DIV/0!	Ssa09025735,WAT1-related protein,EamA
Ssa08023388	0.246	0.185	0.173	0.201333	3.478	1.378	8.087	4.31433	21.4288	4.42148	0.253	0.538	0.341	0.377333	1.87417	3.51523	Ssa08023388,Myosin heavy chain kinase,WD40
Ssa01002492	0	0.032	0	0.0106667	0.359	0.234	0.092	0.228333	21.4062	4.41996	0	0	0	0	0	#DIV/0!	Ssa01002492,Belongs to the multi antimicrobial extrusion (MATE) (TC 2.A.66.1) family,MatE
Ssa10004523	0.883	0.488	0.207	0.526	8.689	9.535	15.543	11.2557	21.3986	4.41944	6.234	8.605	6.999	7.27933	13.839	0.628773	Ssa10004523,Belongs to the short-chain dehydrogenases reductases (SDR) family,adh_short
Ssa13008059	0.246	0.2	0.2	0.215333	4.244	5.693	3.829	4.58867	21.3096	4.41343	0.014	0.015	0	0.00966667	0.0448916	8.89084	Ssa13008059,phospholipase d,"C2,PLD_C,PLDc"
Ssa03013041	1.456	3.94	3.323	2.90633	77.232	58.779	49.449	61.82	21.2708	4.4108	0.174	0.307	0.182	0.221	0.0760408	8.12788	Ssa03013041,arbuscular mycorrhizal association,-
Ssa11005362	1.805	0.351	0.359	0.838333	12.737	8.9	31.852	17.8297	21.268	4.41061	0	0.091	0.225	0.105333	0.125646	7.40317	Ssa11005362,bifunctional UDP-glucose 4-epimerase and UDP-xylose 4-epimerase,GDP_Man_Dehyd
Ssa13008421	1.31	0.636	0.632	0.859333	1.29	7.644	45.828	18.254	21.242	4.40885	1.429	1.321	0.717	1.15567	1.34484	3.98142	Ssa13008421,Belongs to the cytochrome P450 family,p450
Ssa01002622	12.37	3.47	5.495	7.11167	140.782	187.293	124.942	151.006	21.2335	4.40827	409.565	469.266	385.454	421.428	59.2587	-1.48068	Ssa01002622,Caffeoylshikimate esterase-like,Hydrolase_4
Ssa11005444	0.177	0.1	0.234	0.170333	4.484	5.405	0.922	3.60367	21.1566	4.40303	0	0	0	0	0	#DIV/0!	Ssa11005444,Encoded by,UDPGT
Ssa10004164	1.025	0.865	1.148	1.01267	26.584	20.531	17.12	21.4117	21.1438	4.40217	71.247	60.22	53.394	61.6203	60.8496	-1.52501	Ssa10004164,Ankyrin repeats (3 copies),"Ank,Ank_2,Ank_4,Ank_5"
Ssa10003502	0	0	0.021	0.007	0.311	0.043	0.09	0.148	21.1429	4.4021	0.088	0.056	0.5	0.214667	30.6667	-0.536501	Ssa10003502,receptor-like protein kinase,"Malectin_like,Pkinase_Tyr"
Ssa08022340	0	1.403	0.82	0.741	20.681	9.269	16.921	15.6237	21.0846	4.39812	0	0	0	0	0	#DIV/0!	Ssa08022340,-,-
Ssa13009292	0.04	0	0	0.0133333	0.71	0.11	0.022	0.280667	21.05	4.39575	1.397	1.548	2.745	1.89667	142.25	-2.75654	Ssa13009292,Glycerol-3-phosphate 2-O-acyltransferase,"Acyltransferase,HAD"
Ssa10003549	2.306	0.482	5.635	2.80767	3.851	170.427	2.6	58.9593	20.9994	4.39228	0.094	0	0	0.0313333	0.0111599	10.8778	Ssa10003549,Major allergen Pru,Bet_v_1
Ssa03014179	0.473	0	0.277	0.25	2.917	9.696	3.032	5.215	20.86	4.38267	2491.34	2569.77	3762.71	2941.27	11765.1	-9.13956	Ssa03014179,Photosystem I reaction center subunit psaK,PSI_PSAK
Ssa01002714	0.522	0.838	0.629	0.663	17.4	13.751	10.163	13.7713	20.7712	4.37652	16.37	12.791	8.635	12.5987	19.0025	0.128397	Ssa01002714,Belongs to the ABC transporter superfamily. ABCG family. PDR (TC 3.A.1.205) subfamily,"ABC2_membrane,ABC_tran,ABC_trans_N,PDR_assoc"
Ssa13008511	0	0.023	0	0.00766667	0.23	0.197	0.05	0.159	20.7391	4.37428	0.069	0	0	0.023	3	2.78932	Ssa13008511,receptor-like serine threonine-protein kinase,"LRR_8,Malectin_like,Pkinase,Pkinase_Tyr"
Ssa09024925	0.235	0.848	1.486	0.856333	19.066	21.21	12.853	17.7097	20.6808	4.37022	0	0.037	0.181	0.0726667	0.0848579	7.92903	Ssa09024925,sodium-coupled neutral amino acid transporter,Aa_trans
Ssa12006666	1.492	1.011	1.663	1.38867	28.529	22.947	33.485	28.3203	20.3939	4.35007	1.134	1.244	0.768	1.04867	0.755161	4.75521	Ssa12006666,Zinc finger protein,zf-C2H2_jaz
Ssa07020293	0.494	0	0.543	0.345667	6.053	6.589	8.443	7.02833	20.3327	4.34573	37.848	38.2	29.823	35.2903	102.094	-2.32802	Ssa07020293,Belongs to the UPP synthase family,Prenyltransf
Ssa05017190	0	0.084	0	0.028	0.721	0.504	0.476	0.567	20.25	4.33985	7.697	4.09	4.384	5.39033	192.512	-3.24895	Ssa05017190,Encoded by,Abhydrolase_3
Ssa02009576	7.31	5.762	6.732	6.60133	184.618	140.636	75.037	133.43	20.2126	4.33719	0.402	0.48	1.107	0.663	0.100434	7.65286	Ssa02009576,Glutaminyl-peptide,Glu_cyclase_2
Ssa04014377	3.179	1.324	0.536	1.67967	26.935	31.752	42.351	33.6793	20.0512	4.32562	0	0	0	0	0	#DIV/0!	Ssa04014377,-,-
Ssa03012559	0	0.104	0.121	0.075	3.181	1.244	0.073	1.49933	19.9911	4.32129	0	0	0	0	0	#DIV/0!	Ssa03012559,VQ motif-containing protein,VQ
Ssa04015671	1.071	1.497	0.168	0.912	18.657	10.133	25.718	18.1693	19.9225	4.31633	65.102	52.85	72.297	63.4163	69.5355	-1.80335	Ssa04015671,Cytochrome p450,p450
Ssa09024985	2.067	0.648	0.871	1.19533	16.528	18.966	35.86	23.7847	19.8979	4.31455	16.839	18.705	13.69	16.4113	13.7295	0.535339	Ssa09024985,Belongs to the UDP-glycosyltransferase family,UDPGT
Ssa12006903	6.159	5.094	2.754	4.669	40.39	116.246	121.518	92.718	19.8582	4.31166	0	0.079	0.078	0.0523333	0.0112087	10.7909	Ssa12006903,-,-
Ssa10004166	20.677	48.347	66.172	45.0653	865.742	1315.98	494.645	892.124	19.7962	4.30715	0.844	0.661	0.653	0.719333	0.015962	10.2764	Ssa10004166,Belongs to the glyceraldehyde-3-phosphate dehydrogenase family,"Gp_dh_C,Gp_dh_N"
Ssa03012773	0	0.184	0.859	0.347667	3.611	13.02	3.91	6.847	19.6942	4.2997	0	0	0.753	0.251	0.721956	4.76971	Ssa03012773,-,-
Ssa07020865	0.325	0.061	0.321	0.235667	8.615	1.982	3.296	4.631	19.6506	4.2965	4.058	3.773	1.221	3.01733	12.8034	0.61805	Ssa07020865,Belongs to the cytochrome P450 family,p450
Ssa12007537	0.055	0.123	0.048	0.0753333	1.087	1.088	2.248	1.47433	19.5708	4.29063	0.08	0.512	0.59	0.394	5.23009	1.9038	Ssa12007537,-,-
Ssa12007088	27.764	10.145	16.021	17.9767	338.938	378.131	337.981	351.683	19.5633	4.29008	3.061	3.509	3.718	3.42933	0.190766	6.68021	Ssa12007088,helix loop helix domain,HLH
Ssa02011693	0	0.609	1.186	0.598333	9.853	2.927	22.042	11.6073	19.3994	4.27794	0	0	0	0	0	#DIV/0!	Ssa02011693,-,-
Ssa13008601	4.555	5.759	7.183	5.83233	103.632	120.24	114.104	112.659	19.3162	4.27174	179.821	186.621	83.66	150.034	25.7245	-0.413331	Ssa13008601,Molybdate transporter,MFS_MOT1
Ssa05016113	98.247	48.311	88.986	78.5147	1329.93	1803.76	1407.67	1513.79	19.2803	4.26906	1.638	1.915	4.126	2.55967	0.0326011	9.20799	Ssa05016113,-,-
Ssa09025831	0.428	0.879	1.745	1.01733	29.192	15.723	13.878	19.5977	19.2638	4.26782	0.257	0.182	0.3	0.246333	0.242136	6.31393	Ssa09025831,cytochrome P450,p450
Ssa08021927	0	0.609	1.186	0.598333	9.853	2.683	22.042	11.526	19.2635	4.2678	0	0	0	0	0	#DIV/0!	Ssa08021927,-,-
Ssa03013718	4.555	5.759	7.258	5.85733	104.05	119.851	114.471	112.791	19.2563	4.26726	179.569	186.621	83.726	149.972	25.6041	-0.411045	Ssa03013718,Molybdate transporter,MFS_MOT1
Ssa08021873	8.662	7.533	9.66	8.61833	113.973	268.901	114.704	165.859	19.2449	4.26641	0	0	0.094	0.0313333	0.00363566	12.37	Ssa08021873,-,-
Ssa11006259	0.283	0.64	0.083	0.335333	1.485	2.221	15.641	6.449	19.2316	4.26541	0.069	0.074	0.146	0.0963333	0.287276	6.0649	Ssa11006259,Chaperone protein,DnaJ
Ssa04014654	0.475	0.715	0.358	0.516	4.959	1.166	23.638	9.921	19.2267	4.26504	1.596	1.326	4.766	2.56267	4.96641	1.95284	Ssa04014654,PDDEXK-like family of unknown function,PDDEXK_6
Ssa07021122	0.042	0	0.074	0.0386667	0.311	1.332	0.585	0.742667	19.2069	4.26355	0	0	0	0	0	#DIV/0!	Ssa07021122,Belongs to the glycosyl hydrolase 9 (cellulase E) family,Glyco_hydro_9
Ssa09025576	1.826	1.552	13.213	5.53033	141.122	91.781	85.516	106.14	19.1923	4.26245	0	0	0	0	0	#DIV/0!	Ssa09025576,transcription factor,HLH
Ssa13009336	3.469	9.022	8.6	7.03033	99.091	203.055	102.331	134.826	19.1777	4.26136	0	0	0	0	0	#DIV/0!	Ssa13009336,Copper transporter,Ctr
Ssa02011748	8.662	7.533	9.768	8.65433	114.311	267.246	114.704	165.42	19.1142	4.25657	0	0	0.094	0.0313333	0.00362054	12.3662	Ssa02011748,-,-
Ssa11005919	1.537	0	1.803	1.11333	20.024	38.001	5.748	21.2577	19.0937	4.25503	0	4.804	0.395	1.733	1.55659	3.61664	Ssa11005919,-,-
Ssa08023398	0.128	0.096	0.618	0.280667	11.576	3.927	0.563	5.35533	19.0808	4.25405	0	0	0	0	0	#DIV/0!	Ssa08023398,inactive receptor kinase,"LRRNT_2,LRR_1,LRR_4,LRR_8,Pkinase,Pkinase_Tyr"
Ssa06018876	0	0.102	0.089	0.0636667	0.72	0.673	2.24	1.211	19.0209	4.24952	6.837	4.836	3.08	4.91767	77.2408	-2.02178	Ssa06018876,9-cis-epoxycarotenoid dioxygenase,RPE65
Ssa10003073	0	0.036	0	0.012	0.175	0	0.506	0.227	18.9167	4.24159	16.459	13.646	17.899	16.0013	1333.44	-6.13936	Ssa10003073,F-box kelch-repeat protein,"F-box,FBA_1,FBA_3"
Ssa05017178	1.321	0.545	0.675	0.847	9.104	10.791	27.93	15.9417	18.8213	4.2343	26.312	21.873	29.167	25.784	30.4416	-0.693674	Ssa05017178,Belongs to the UDP-glycosyltransferase family,UDPGT
Ssa07020941	2.023	0.393	1.091	1.169	18.143	35.422	12.169	21.9113	18.7437	4.22833	0	0	0	0	0	#DIV/0!	Ssa07020941,Transcription factor,Myb_DNA-binding
Ssa08022989	0	0.021	0	0.007	0.167	0.226	0	0.131	18.7143	4.22607	0	0	0	0	0	#DIV/0!	Ssa08022989,"cla,cla1,def,dxps2,dxs","DXP_synthase_N,Transket_pyr,Transketolase_C"
Ssa04014860	2.028	0.585	2.126	1.57967	34.104	21.894	31.464	29.154	18.4558	4.206	251.693	235.885	139.255	208.944	132.271	-2.84135	Ssa04014860,Belongs to the UDP-glycosyltransferase family,UDPGT
Ssa03013848	0.955	0.425	0.535	0.638333	11.608	13.785	9.766	11.7197	18.3598	4.19848	0.16	0.237	0.067	0.154667	0.242298	6.24363	Ssa03013848,C2H2-type zinc finger,zf-C2H2_6
Ssa06019246	14.227	5.447	41.156	20.2767	56.985	815.859	238.303	370.382	18.2664	4.19112	0.355	0	0.372	0.242333	0.0119513	10.5778	Ssa06019246,-,-
Ssa12007355	1.971	2.671	8.323	4.32167	1.322	230.736	4.001	78.6863	18.2074	4.18645	26.512	26.638	0.228	17.7927	4.11708	2.14483	Ssa12007355,alpha-amylase subtilisin,Kunitz_legume
Ssa05016498	1.489	2.069	1.813	1.79033	31.614	38.524	26.975	32.371	18.081	4.1764	1.347	1.252	1.149	1.24933	0.697822	4.69547	Ssa05016498,-,-
Ssa07021353	7.511	6.265	13.582	9.11933	192.809	199.415	102.413	164.879	18.0802	4.17634	66.545	62.188	89.088	72.607	7.96188	1.18323	Ssa07021353,Amino acid permease,Aa_trans
Ssa07020844	2.099	1.95	1.689	1.91267	29.428	30.37	43.868	34.5553	18.0666	4.17525	2.724	3.07	1.585	2.45967	1.28599	3.81237	Ssa07020844,UDP-Glycosyltransferase,UDPGT
Ssa05016786	0.301	0	0	0.100333	1.115	1.908	2.415	1.81267	18.0664	4.17524	0	0	0	0	0	#DIV/0!	Ssa05016786,Ion channel,Ion_trans_2
Ssa06018726	0.873	0.715	0.785	0.791	12.591	19.747	10.41	14.2493	18.0143	4.17107	56.589	33.087	17.358	35.678	45.1049	-1.32414	Ssa06018726,Belongs to the histidine acid phosphatase family,His_Phos_2
Ssa01001410	1.195	4.914	7.197	4.43533	147.625	68.746	23.076	79.8157	17.9954	4.16956	0.135	0.072	0.071	0.0926667	0.0208928	9.75041	Ssa01001410,Protein LIGHT-DEPENDENT SHORT HYPOCOTYLS,DUF640
Ssa01001555	7.825	3.493	2.741	4.68633	34.105	33.881	181.917	83.301	17.7753	4.1518	8.806	10.387	16.405	11.866	2.53204	2.8115	Ssa01001555,EID1-like F-box protein 3,F-box-like
Ssa10004240	0.314	0.331	0.166	0.270333	2.384	5.516	6.449	4.783	17.693	4.1451	0.139	0	0	0.0463333	0.171393	6.68972	Ssa10004240,Transcription factor,Myb_DNA-binding
Ssa01001202	1.355	2.296	7.526	3.72567	11.868	177.024	8.325	65.739	17.6449	4.14118	0.187	0.265	1.438	0.63	0.169097	6.70525	Ssa01001202,Thaumatin-like protein,Thaumatin
Ssa11006002	0	0.129	0.05	0.0596667	0.819	0.723	1.616	1.05267	17.6425	4.14098	0	0	0	0	0	#DIV/0!	Ssa11006002,Belongs to the cyclin family,"Cyclin_C,Cyclin_N"
Ssa07021018	0.264	0.025	0.175	0.154667	3.486	3.349	1.324	2.71967	17.5841	4.1362	0	0	0	0	0	#DIV/0!	Ssa07021018,ARM-repeat Tetratricopeptide repeat (TPR)-like protein,-
Ssa12007588	0	0.345	0.201	0.182	0.371	8.181	1.04	3.19733	17.5678	4.13486	0	0.089	0.088	0.059	0.324176	5.76001	Ssa12007588,Thaumatin family,Thaumatin
Ssa02011825	2.626	2.678	6.557	3.95367	43.869	106.015	58.455	69.4463	17.565	4.13464	16.436	14.888	11.961	14.4283	3.64936	2.26699	Ssa02011825,E3 ubiquitin-protein ligase,"zf-C3HC4,zf-C3HC4_2,zf-RING_UBOX"
Ssa09025944	0.809	0.203	0.712	0.574667	11.599	10.244	8.356	10.0663	17.5168	4.13067	0	0	0	0	0	#DIV/0!	Ssa09025944,-,-
Ssa02010540	1.954	0.401	0.781	1.04533	18.383	19.887	16.433	18.2343	17.4436	4.12462	0	0.028	0.055	0.0276667	0.0264668	9.36429	Ssa02010540,Glycosyl hydrolase family 10 protein,"CBM_4_9,Glyco_hydro_10"
Ssa03012645	12.604	6.386	8.809	9.26633	130.58	234.273	119.433	161.429	17.421	4.12275	1.818	2.485	2.727	2.34333	0.252887	6.10619	Ssa03012645,-,-
Ssa02010428	0.825	0.71	0.829	0.788	9.751	24.929	6.167	13.6157	17.2788	4.11093	1.299	2.209	0.636	1.38133	1.75296	3.30113	Ssa02010428,RbcX protein,RcbX
Ssa01001814	15.542	4.19	6.687	8.80633	153.232	89.802	212.237	151.757	17.2327	4.10708	0.998	1.909	0.786	1.231	0.139786	6.94579	Ssa01001814,transcription factor,Myb_DNA-binding
Ssa07020718	3.875	3.372	4.47	3.90567	41.46	62.388	98.035	67.2943	17.2299	4.10684	22.917	24.693	11.696	19.7687	5.06153	1.76727	Ssa07020718,Agamous-like MADS-box protein,SRF-TF
Ssa01001821	2.789	6.337	4.965	4.697	118.441	73.821	49.412	80.558	17.1509	4.10022	26.021	13.731	14.276	18.0093	3.83422	2.16128	Ssa01001821,ubiquitin protein ligase activity,"Hemerythrin,zf-CHY,zf-RING_2,zinc_ribbon_6"
Ssa02009473	6.64	2.065	4.953	4.55267	58.609	104.435	69.858	77.634	17.0524	4.0919	36.075	37.665	50.792	41.5107	9.11788	0.903207	Ssa02009473,-,-
Ssa05016636	0.205	0.684	0.232	0.373667	7.404	2.466	9.163	6.34433	16.9786	4.08564	0.819	0.733	1.855	1.13567	3.03925	2.48193	Ssa05016636,Protein of unknown function (DUF688),DUF688
Ssa12006654	5.522	3.805	3.541	4.28933	46.269	60.775	109.49	72.178	16.8273	4.07273	6.467	6.069	6.139	6.225	1.45127	3.53541	Ssa12006654,LOB domain-containing protein,LOB
Ssa12007590	120.915	65.956	196.845	127.905	258.049	5750.39	440.408	2149.62	16.8063	4.07093	0.084	0	0.088	0.0573333	0.000448248	15.1943	Ssa12007590,Thaumatin family,Thaumatin
Ssa11005314	0.298	0.224	0.449	0.323667	6.195	6.077	4.043	5.43833	16.8023	4.07058	12.503	16.611	11.518	13.544	41.8455	-1.31642	Ssa11005314,-,-
Ssa12006963	18.085	1.589	41.633	20.4357	216.761	492.874	320.098	343.244	16.7963	4.07007	0	0	0	0	0	#DIV/0!	Ssa12006963,-,-
Ssa08023430	0.333	0.361	0.275	0.323	4.99	2.694	8.59	5.42467	16.7946	4.06993	1.133	0.618	0.788	0.846333	2.62023	2.68024	Ssa08023430,LRR receptor-like serine threonine-protein kinase,"LRRNT_2,LRR_1,LRR_4,LRR_8"
Ssa07021435	21.134	25.152	54.783	33.6897	416.974	894.088	381.587	564.216	16.7475	4.06587	0	0	0	0	0	#DIV/0!	Ssa07021435,transcription factor,HLH
Ssa06018263	0.387	0.291	0.227	0.301667	0.954	2.332	11.844	5.04333	16.7182	4.06335	25.395	35.954	9.848	23.7323	78.6707	-2.2344	Ssa06018263,18 kDa seed maturation,LEA_1
Ssa06017538	0.07	0	0.123	0.0643333	2.418	0.315	0.484	1.07233	16.6684	4.05904	0	0.054	0.054	0.036	0.559585	4.89661	Ssa06017538,Glucose and ribitol,adh_short_C2
Ssa06018530	8.21	3.028	4.938	5.392	91.238	105.617	72.094	89.6497	16.6264	4.05541	32.453	34.296	26.246	30.9983	5.74895	1.53211	Ssa06018530,Nudix hydrolase,NUDIX
Ssa12007087	0.503	0.421	0.688	0.537333	15.807	5.657	5.31	8.92467	16.6092	4.05391	27.465	22.253	39.736	29.818	55.4926	-1.74031	Ssa12007087,ubiE/COQ5 methyltransferase family,"Methyltransf_11,Methyltransf_25"
Ssa05015800	0.264	0.796	1.063	0.707667	0.192	34.173	0.847	11.7373	16.586	4.05189	0	0	0	0	0	#DIV/0!	Ssa05015800,Belongs to the oxygen-dependent FAD-linked oxidoreductase family,"BBE,FAD_binding_4"
Ssa01002293	2.671	1.478	2.35	2.16633	30.907	54.429	22.131	35.8223	16.5359	4.04753	1.843	1.746	0.337	1.30867	0.604093	4.77469	Ssa01002293,transcription factor,AP2
Ssa13009046	2.529	5.582	3.875	3.99533	62.984	51.983	83.189	66.052	16.5323	4.04721	43.79	34.752	34.427	37.6563	9.42508	0.81071	Ssa13009046,GTP cyclohydrolase,GTP_cyclohydroI
Ssa03013725	0.454	1.745	0.76	0.986333	26.545	5.015	17.358	16.306	16.5319	4.04718	37.383	30.535	38.613	35.5103	36.0024	-1.12284	Ssa03013725,D-glycerate 3-kinase,PRK
Ssa01002006	0.816	0.384	0.449	0.549667	0.236	26.838	0.163	9.079	16.5173	4.0459	1.874	3.665	0.866	2.135	3.88417	2.0883	Ssa01002006,Encoded by,Kunitz_legume
Ssa06018398	4.478	2.334	5.849	4.22033	100.588	76.361	30.823	69.2573	16.4104	4.03654	0	0	0	0	0	#DIV/0!	Ssa06018398,nitrite transporter,PTR2
Ssa11005775	2.759	3.561	10.403	5.57433	9.479	263.8	0	91.093	16.3415	4.03047	0	0	0	0	0	#DIV/0!	Ssa11005775,lipid-transfer protein,LTP_2
Ssa01002175	0.594	0.179	0.575	0.449333	4.533	5.158	12.314	7.335	16.3242	4.02894	79.482	81.134	72.345	77.6537	172.82	-3.40419	Ssa01002175,Transcription factor,TCP
Ssa01002794	5.014	2.259	7.232	4.835	20.662	196.352	19.146	78.72	16.2813	4.02514	0.091	0.289	5.456	1.94533	0.402344	5.33864	Ssa01002794,Belongs to the glycosyl hydrolase 18 family,Glyco_hydro_18
Ssa01002837	17.732	6.752	44.072	22.852	143.244	837.105	134.918	371.756	16.268	4.02396	0	0	0	0	0	#DIV/0!	Ssa01002837,Belongs to the iron ascorbate-dependent oxidoreductase family,"2OG-FeII_Oxy,DIOX_N"
Ssa03013580	1.384	0.749	0.495	0.876	14.278	22.839	5.567	14.228	16.242	4.02166	51.971	55.472	38.408	48.617	55.4989	-1.77273	Ssa03013580,F-box kelch-repeat protein,"F-box,F-box-like,Kelch_3,Kelch_4,Kelch_5"
Ssa01002380	0.459	0.23	0	0.229667	3.042	1.937	6.21	3.72967	16.2395	4.02143	13.717	15.655	12.63	14.0007	60.9608	-1.90838	Ssa01002380,-,-
Ssa07021143	2.963	2.789	2.77	2.84067	26.295	37.019	75.027	46.1137	16.2334	4.02089	971.938	1069.85	859.684	967.158	340.469	-4.39049	Ssa07021143,Zinc finger protein CONSTANS-like,"CCT,zf-B_box"
Ssa06019306	3.639	3.619	7.518	4.92533	64.099	89.879	85.506	79.828	16.2076	4.0186	101.639	103.982	88.796	98.139	19.9254	-0.297932	Ssa06019306,Belongs to the UDP-glycosyltransferase family,UDPGT
Ssa06018653	1.13	0.122	0.142	0.464667	0.448	1.022	21.122	7.53067	16.2066	4.01851	55.996	78.554	52.183	62.2443	133.955	-3.04709	Ssa06018653,-,-
Ssa06017809	1.889	0.498	6.315	2.90067	7.295	132.324	1.312	46.977	16.1952	4.0175	1.18	1.439	0.802	1.14033	0.393128	5.36443	Ssa06017809,Belongs to the peptidase A1 family,"TAXi_C,TAXi_N"
Ssa04015775	0.079	0.059	0.484	0.207333	4.83	4.759	0.42	3.33633	16.0916	4.00824	0	0	0.061	0.0203333	0.0980707	7.35827	Ssa04015775,Transcription factor,Myb_DNA-binding
Ssa01002013	0.2	0.151	0.352	0.234333	0.092	11.122	0	3.738	15.9516	3.99563	0	0	0	0	0	#DIV/0!	Ssa01002013,Soybean trypsin inhibitor (Kunitz) family of protease inhibitors,Kunitz_legume
Ssa08022971	0.474	0.56	0.417	0.483667	8.478	8.443	6.107	7.676	15.8704	3.98827	2.088	1.268	1.618	1.658	3.42798	2.21091	Ssa08022971,DNA repair protein XRCC3 homolog,Rad51
Ssa13008734	1.384	0.814	0.495	0.897667	14.178	22.761	5.59	14.1763	15.7924	3.98116	53.02	56.013	39.075	49.3693	54.9974	-1.80013	Ssa13008734,F-box kelch-repeat protein,"F-box,F-box-like,Kelch_3,Kelch_4,Kelch_5"
Ssa08023021	0.154	0	0.135	0.0963333	2.485	1.736	0.328	1.51633	15.7405	3.97641	0	0	0	0	0	#DIV/0!	Ssa08023021,Belongs to the tetraspanin (TM4SF) family,Tetraspannin
Ssa12006577	0.759	0	0.668	0.475667	10.971	9.44	2.028	7.47967	15.7246	3.97495	0.14	0	0	0.0466667	0.0981079	7.32444	Ssa12006577,DVL family,DVL
Ssa09024409	0.289	0	0.254	0.181	2.537	1.828	4.164	2.843	15.7072	3.97335	3.82	4.962	6.238	5.00667	27.6611	-0.816436	Ssa09024409,-,-
Ssa01002203	0.086	0.032	0.076	0.0646667	1.135	1.129	0.782	1.01533	15.701	3.97279	0	0.067	0.033	0.0333333	0.515464	4.92884	Ssa01002203,Cytochrome p450,p450
Ssa03014102	0	1.187	0.462	0.549667	0	25.786	0	8.59533	15.6374	3.96692	0	0	0	0	0	#DIV/0!	Ssa03014102,"Embryo-specific protein 3, (ATS3)","ATS3,PLAT"
Ssa08023059	0.406	0.076	0.446	0.309333	5.866	7.984	0.65	4.83333	15.625	3.96578	0	0	0	0	0	#DIV/0!	Ssa08023059,Early nodulin-like protein,Cu_bind_like
Ssa01000895	0	0.033	0.038	0.0236667	0.221	0.864	0.023	0.369333	15.6056	3.964	0.096	0.034	0.101	0.077	3.25352	2.26199	Ssa01000895,Belongs to the UDP-glycosyltransferase family,UDPGT
Ssa08023220	1.613	1.417	3.429	2.153	15.322	55.551	29.903	33.592	15.6024	3.9637	66.096	87.259	82.922	78.759	36.581	-1.22933	Ssa08023220,transcription factor,Myb_DNA-binding
Ssa03012592	44.211	35.585	26.08	35.292	564.975	576.188	509.99	550.384	15.5952	3.96303	4.856	11.646	5.229	7.24367	0.20525	6.24758	Ssa03012592,-,Auxin_inducible
Ssa08023107	3.991	3.33	5.694	4.33833	65.804	98.735	37.745	67.428	15.5424	3.95813	93.255	123.892	139.854	119	27.43	-0.819546	Ssa08023107,E3 ubiquitin-protein ligase,zf-RING_2
Ssa03012555	0	0	0.018	0.006	0.233	0	0.043	0.092	15.3333	3.9386	0.044	0.031	0	0.025	4.16667	1.87971	Ssa03012555,-,-
Ssa04014319	2.248	2.19	4.537	2.99167	52.165	63.744	21.616	45.8417	15.3231	3.93764	15.358	20.146	33.47	22.9913	7.68513	0.995569	Ssa04014319,transcription factor,-
Ssa10004749	4.779	1.14	2.339	2.75267	25.9	25.082	75.079	42.0203	15.2653	3.93219	126.57	134.838	114.328	125.245	45.4996	-1.5756	Ssa10004749,Protein NRT1 PTR FAMILY,PTR2
Ssa11005813	3.068	1.525	1.782	2.125	36.695	37.796	22.357	32.2827	15.1918	3.92523	0.226	0.096	0.142	0.154667	0.0727843	7.70545	Ssa11005813,UDP-galactose UDP-glucose transporter,UAA
Ssa11004988	0.598	1.162	0.776	0.845333	14.939	9.511	13.859	12.7697	15.1061	3.91706	0.023	0.074	0.073	0.0566667	0.0670347	7.816	Ssa11004988,Belongs to the NPH3 family,"BTB,NPH3"
Ssa08023015	18.14	6.918	25.909	16.989	151.227	437.224	180.974	256.475	15.0965	3.91615	23.293	22.732	23.18	23.0683	1.35784	3.47483	Ssa08023015,RING-H2 finger protein,zf-RING_2
Ssa10002912	0.074	0.056	0.109	0.0796667	1.889	1.388	0.331	1.20267	15.0962	3.91612	0.018	0.019	0	0.0123333	0.154812	6.60753	Ssa10002912,Cation H( ) antiporter,Na_H_Exchanger
Ssa12007181	3.267	3.131	2.352	2.91667	71.573	8.06	51.096	43.5763	14.9405	3.90115	3.93	2.553	0.458	2.31367	0.793257	4.23529	Ssa12007181,-,-
Ssa13009358	0.386	0.339	1.413	0.712667	0.891	30.508	0.446	10.615	14.8948	3.89673	0.945	1.054	3.62	1.873	2.62816	2.50268	Ssa13009358,Aldo-keto reductase family 4 member,Aldo_ket_red
Ssa02009643	3.976	2.572	3.005	3.18433	39.496	56.777	45.8	47.3577	14.8721	3.89453	0.617	1.05	0.908	0.858333	0.269549	5.78592	Ssa02009643,Carboxylesterase 1-like,Abhydrolase_3
Ssa06018944	11.372	6.87	7.795	8.679	82.742	183.101	120.086	128.643	14.8223	3.8897	281.213	280.595	218.477	260.095	29.9683	-1.01567	Ssa06018944,Senescence regulator,Senescence_reg
Ssa05016476	0.067	0.034	0.039	0.0466667	1.047	0.203	0.815	0.688333	14.75	3.88264	0	0	0	0	0	#DIV/0!	Ssa05016476,"Plant lipoxygenase may be involved in a number of diverse aspects of plant physiology including growth and development, pest resistance, and senescence or responses to wounding","Lipoxygenase,PLAT"
Ssa02010383	62.802	54.806	62.651	60.0863	1112.07	927.34	611.883	883.765	14.7083	3.87855	1.545	0.821	1.014	1.12667	0.0187508	9.61546	Ssa02010383,-,-
Ssa02011343	1.096	5.158	3.423	3.22567	76.871	21.66	43.533	47.3547	14.6806	3.87584	2.337	1.798	2.664	2.26633	0.702594	4.38507	Ssa02011343,Belongs to the precorrin methyltransferase family,TP_methylase
Ssa13008455	0.514	0.774	1.763	1.017	17.509	15.355	11.896	14.92	14.6706	3.87486	0	0	0	0	0	#DIV/0!	Ssa13008455,-,-
Ssa06018472	2.802	1.717	2.265	2.26133	11.242	76.301	11.193	32.912	14.5542	3.86337	0.407	0.407	0.754	0.522667	0.231132	5.97658	Ssa06018472,Lysosomal beta glucosidase-like,"Glyco_hydro_3,Glyco_hydro_3_C"
Ssa08023142	0.446	1.141	1.803	1.13	25.099	23.293	0.904	16.432	14.5416	3.86211	0.066	0	0	0.022	0.019469	9.54479	Ssa08023142,Hydrophobic seed protein,Hydrophob_seed
Ssa13008939	0.558	1.168	1.365	1.03033	22.3	10.266	12.061	14.8757	14.4377	3.85177	12.686	8.825	5.178	8.89633	8.63442	0.741672	Ssa13008939,ABC transporter C family member,"ABC_membrane,ABC_tran"
Ssa05016293	0.176	0.796	0.62	0.530667	9.099	7.171	6.682	7.65067	14.4171	3.84971	0	0	0	0	0	#DIV/0!	Ssa05016293,transcription factor,HLH
Ssa03014000	0.211	0.106	0.186	0.167667	1.984	1.463	3.794	2.41367	14.3956	3.84756	142.087	112.176	134.999	129.754	773.881	-5.74841	Ssa03014000,Protein NRT1 PTR FAMILY,PTR2
Ssa05017333	0.256	0.193	0	0.149667	0.829	1.39	4.243	2.154	14.392	3.84719	0	0	0	0	0	#DIV/0!	Ssa05017333,auxin-induced protein,Auxin_inducible
Ssa01000320	0.031	0	0.789	0.273333	0.643	10.177	0.958	3.926	14.3634	3.84433	0	0.024	0	0.008	0.0292683	8.93884	Ssa01000320,Long chain acyl-CoA synthetase,"AMP-binding,AMP-binding_C"
Ssa11005822	0.46	0.346	0.231	0.345667	4.132	7.249	3.509	4.96333	14.3587	3.84386	0	0	0.051	0.017	0.0491803	8.18963	Ssa11005822,Protein of unknown function (DUF1664),DUF1664
Ssa07020453	0	0.109	0	0.0363333	0.734	0.522	0.308	0.521333	14.3486	3.84284	0	0	0	0	0	#DIV/0!	Ssa07020453,Cytochrome p450,p450
Ssa05017219	100.323	14.058	161.853	92.078	225.767	2713.5	983.02	1307.43	14.1991	3.82773	69.173	59.71	56.287	61.7233	0.670337	4.40477	Ssa05017219,-,-
Ssa05016532	0	0.195	0	0.065	0.6	1.877	0.277	0.918	14.1231	3.81998	0.381	2.23	1.802	1.471	22.6308	-0.680231	Ssa05016532,-,-
Ssa09025636	5.856	3.858	2.254	3.98933	2.031	87.39	79.381	56.2673	14.1044	3.81808	25.829	39.747	31.069	32.215	8.07528	0.804565	Ssa09025636,Bet1-like protein,-
Ssa06019465	0	0	0.038	0.0126667	0.139	0.35	0.046	0.178333	14.0789	3.81547	496.853	581.324	384.456	487.544	38490.3	-11.4167	Ssa06019465,Cytochrome p450,p450
Ssa03014013	0	0.043	0	0.0143333	0.502	0.103	0	0.201667	14.0698	3.81453	0.084	0	0	0.028	1.95349	2.84847	Ssa03014013,Adenylate isopentenyltransferase-like,IPPT
Ssa11005395	8.477	35.343	15.25	19.69	430.735	145.609	242.839	273.061	13.868	3.79369	1.767	0.692	2.685	1.71467	0.0870831	7.31515	Ssa11005395,Belongs to the cysteine synthase cystathionine beta- synthase family,PALP
Ssa05016181	0.356	0.291	0.366	0.337667	4.369	4.137	5.49	4.66533	13.8164	3.78831	0.197	0.209	0.229	0.211667	0.626851	4.46211	Ssa05016181,ABC transporter G family member,"ABC2_membrane,ABC_tran"
Ssa01001756	4.074	3.162	0.607	2.61433	3.305	11.168	93.753	36.0753	13.7991	3.7865	4.654	3.183	2.951	3.596	1.37549	3.32655	Ssa01001756,Heat Stress Transcription Factor,HSF_DNA-bind
Ssa02011791	0	0.075	0	0.025	0.046	0.985	0	0.343667	13.7467	3.78101	0	0	0	0	0	#DIV/0!	Ssa02011791,Protein of unknown function (DUF679),DUF679
Ssa04015437	0.281	0.106	0	0.129	1.428	1.778	2.1	1.76867	13.7106	3.77722	0.413	1.206	1.842	1.15367	8.94315	0.616436	Ssa04015437,LRR receptor-like serine threonine-protein kinase,"LRR_1,LRR_8,Malectin_like,Pkinase,Pkinase_Tyr"
Ssa09025015	3.094	1.674	2.297	2.355	7.064	13.203	76.282	32.183	13.6658	3.7725	40.296	39.656	26.56	35.504	15.076	-0.141683	Ssa09025015,Late embryogenesis abundant protein,LEA_2
Ssa05016502	0.068	0.153	1.012	0.411	5.506	9.483	1.843	5.61067	13.6513	3.77096	0	0	0	0	0	#DIV/0!	Ssa05016502,Belongs to the short-chain dehydrogenases reductases (SDR) family,"adh_short,adh_short_C2"
Ssa06019608	5.573	12.455	2.847	6.95833	163.47	101.467	19.977	94.9713	13.6486	3.77068	0	0	0	0	0	#DIV/0!	Ssa06019608,14 kDa proline-rich protein DC2.15-like,Hydrophob_seed
Ssa13009200	1.388	0.348	0.233	0.656333	13.148	2.512	11.196	8.952	13.6394	3.76971	0	0	0	0	0	#DIV/0!	Ssa13009200,short-chain dehydrogenase reductase,"adh_short,adh_short_C2"
Ssa11005330	8.198	2.143	6.061	5.46733	138.735	82.285	2.676	74.5653	13.6383	3.7696	0	0	0	0	0	#DIV/0!	Ssa11005330,Belongs to the iron ascorbate-dependent oxidoreductase family,"2OG-FeII_Oxy,DIOX_N"
Ssa12008014	0	0.054	0.063	0.039	0.149	0.065	1.381	0.531667	13.6325	3.76898	0	0	0	0	0	#DIV/0!	Ssa12008014,9-cis-epoxycarotenoid dioxygenase,RPE65
Ssa04014710	0	0	0.063	0.021	0	0.13	0.727	0.285667	13.6032	3.76587	0.105	0.056	0	0.0536667	2.55556	2.41223	Ssa04014710,-,C1_2
Ssa08022268	1.151	5.694	3.568	3.471	75.172	21.809	44.235	47.072	13.5615	3.76145	2.337	1.798	2.749	2.29467	0.661097	4.35851	Ssa08022268,Belongs to the precorrin methyltransferase family,TP_methylase
Ssa01001467	0.6	0.979	0.352	0.643667	5.364	4.25	16.557	8.72367	13.5531	3.76055	39.688	59.757	56.863	52.1027	80.9467	-2.57835	Ssa01001467,Aux IAA proteins are short-lived transcriptional factors that function as repressors of early auxin response genes at low auxin concentrations,AUX_IAA
Ssa10003206	0.32	0.844	0.564	0.576	7.183	10.282	5.945	7.80333	13.5475	3.75995	0.059	0	0	0.0196667	0.0341435	8.63219	Ssa10003206,"Dirigent proteins impart stereoselectivity on the phenoxy radical-coupling reaction, yielding optically active lignans from two molecules of coniferyl alcohol in the biosynthesis of lignans, flavonolignans, and alkaloids and thus plays a central role in plant secondary metabolism",Dirigent
Ssa04015307	9.682	3.624	14.047	9.11767	35.664	251.073	82.632	123.123	13.5038	3.75529	154.496	152.392	165.553	157.48	17.272	-0.355071	Ssa04015307,F-box kelch-repeat protein,"F-box,Kelch_1,Kelch_6"
Ssa09024816	12.525	11.003	5.719	9.749	102.425	17.808	273.929	131.387	13.477	3.75243	109.792	129.293	60.485	99.8567	10.2428	0.395896	Ssa09024816,phosphatase 2c,PP2C
Ssa06019366	1.557	4.409	3.015	2.99367	36.187	27.327	57.208	40.2407	13.4419	3.74867	0.229	0.341	0.385	0.318333	0.106336	6.98197	Ssa06019366,"Removal of H(2)O(2), oxidation of toxic reductants, biosynthesis and degradation of lignin, suberization, auxin catabolism, response to environmental stresses such as wounding, pathogen attack and oxidative stress",peroxidase
Ssa01000104	0	0	0.063	0.021	0.099	0.323	0.42	0.280667	13.3651	3.7404	0.105	0.446	0.386	0.312333	14.873	-0.154229	Ssa01000104,Late embryogenesis abundant protein,SMP
Ssa02010301	0.083	0	0.073	0.052	1.734	0.301	0.045	0.693333	13.3333	3.73697	0.245	0.325	0.193	0.254333	4.89103	1.44683	Ssa02010301,-,-
Ssa06017441	2.922	4.278	1.928	3.04267	29.056	82.555	9.973	40.528	13.3199	3.73551	0.03	0.063	0	0.031	0.0101884	10.3524	Ssa06017441,Ammonium transporter,Ammonium_transp
Ssa13008594	0.409	1.814	0.92	1.04767	19.525	4.973	17.334	13.944	13.3096	3.73439	37.383	30.642	34.018	34.0143	32.4668	-1.2865	Ssa13008594,D-glycerate 3-kinase,PRK
Ssa07021750	5.156	5.338	3.289	4.59433	72.672	78.346	32.296	61.1047	13.3	3.73336	0	0	0	0	0	#DIV/0!	Ssa07021750,transcription factor,-
Ssa04014720	15.482	10.366	5.572	10.4733	170.254	110.945	136.464	139.221	13.2929	3.73258	0	0	0	0	0	#DIV/0!	Ssa04014720,Belongs to the UDP-glycosyltransferase family,UDPGT
Ssa05015940	0.403	0.607	0.414	0.474667	4.196	4.376	10.339	6.30367	13.2802	3.7312	15.857	17.693	57.667	30.4057	64.0569	-2.27008	Ssa05015940,mTERF,mTERF
Ssa11005625	0.14	0.106	0	0.082	0.909	1.143	1.2	1.084	13.2195	3.7246	0.206	0.219	0.108	0.177667	2.16667	2.60912	Ssa11005625,NUDIX domain,NUDIX
Ssa10004012	7.003	5.016	1.653	4.55733	33.966	80.946	65.329	60.0803	13.1832	3.72063	23.479	22.819	10.281	18.8597	4.13831	1.67159	Ssa10004012,Domain of unknown function (DUF4666),DUF4666
Ssa09024138	0.452	0	0	0.150667	2.021	0.954	2.979	1.98467	13.1726	3.71946	39.661	54.045	24.307	39.3377	261.091	-4.30894	Ssa09024138,-,-
Ssa05016364	0	0.066	0.46	0.175333	0.101	6.705	0.116	2.30733	13.1597	3.71805	0	0	0	0	0	#DIV/0!	Ssa05016364,Cystathionine beta-lyase,Cys_Met_Meta_PP
Ssa06017829	0.895	1.654	1.646	1.39833	13.541	13.756	27.894	18.397	13.1564	3.71769	14.289	12.01	8.787	11.6953	8.36377	0.653538	Ssa06017829,"zinc-finger of the FCS-type, C2-C2",zf-FLZ
Ssa02011940	2.205	0.879	0.571	1.21833	10.979	28.745	8.246	15.99	13.1245	3.71419	0	0	0	0	0	#DIV/0!	Ssa02011940,Transcription repressor,Ovate
Ssa08022921	42.837	21.297	27.95	30.6947	333.848	639.537	233.215	402.2	13.1033	3.71185	2.561	4.003	2.847	3.137	0.1022	7.00238	Ssa08022921,-,-
Ssa01002517	8.949	2.282	23.747	11.6593	78.835	282.106	95.457	152.133	13.0481	3.70577	0	0	0	0	0	#DIV/0!	Ssa01002517,-,-
Ssa13008400	0.722	1.304	1.048	1.02467	16.104	9.823	13.937	13.288	12.9681	3.6969	0.133	0.169	0.111	0.137667	0.134353	6.5928	Ssa13008400,Belongs to the GRAS family,GRAS
Ssa12006744	2.712	4.624	2.035	3.12367	42.452	17.888	61.05	40.4633	12.9538	3.6953	3.4	3.24	4.37	3.67	1.1749	3.46276	Ssa12006744,Protein of unknown function (DUF1635),DUF1635
Ssa09024270	3.233	1.378	0.644	1.75167	2.116	9.269	56.342	22.5757	12.8881	3.68797	179.859	237.626	49.804	155.763	88.9227	-2.78651	Ssa09024270,cinnamoyl-CoA reductase 1-like,"3Beta_HSD,Epimerase"
Ssa03012563	8.044	3.153	4.75	5.31567	45.305	65.479	93.714	68.166	12.8236	3.68073	6.804	5.854	2.551	5.06967	0.953722	3.74909	Ssa03012563,basic region leucin zipper,"bZIP_1,bZIP_2"
Ssa10004364	12.81	4.267	4.303	7.12667	29.334	130.323	113.721	91.126	12.7866	3.67656	45.942	49.01	63.627	52.8597	7.41717	0.785695	Ssa10004364,PDDEXK-like family of unknown function,PDDEXK_6
Ssa13008135	4.877	3.26	5.93	4.689	129.359	30.433	19.878	59.89	12.7724	3.67496	29.328	27.531	33.241	30.0333	6.40506	0.995751	Ssa13008135,Belongs to the cysteine synthase cystathionine beta- synthase family,PALP
Ssa11005356	5.207	3.337	3.314	3.95267	26.848	31.664	92.801	50.4377	12.7604	3.6736	4.805	4.328	5.728	4.95367	1.25325	3.34793	Ssa11005356,-,C2
Ssa01000125	6.338	6.498	7.83	6.88867	49.951	111.956	101.783	87.8967	12.7596	3.67351	0	0.105	0	0.035	0.00508081	11.2942	Ssa01000125,Histidine-containing phosphotransfer protein 1-like,Hpt
Ssa07020841	0.137	0.103	0	0.08	1.517	0.371	1.168	1.01867	12.7333	3.67054	0.653	0.214	0.475	0.447333	5.59167	1.18726	Ssa07020841,UDP-glycosyltransferase 87A1-like,UDPGT
Ssa06019766	0.033	0.295	0.057	0.128333	1.9	1.386	1.611	1.63233	12.7195	3.66897	0.012	0	0	0.004	0.0311688	8.67272	Ssa06019766,Belongs to the protein kinase superfamily. Ser Thr protein kinase family,"LRRNT_2,LRR_1,LRR_8,Pkinase"
Ssa11005757	0.111	1.09	0.098	0.433	5.564	6.951	3.987	5.50067	12.7036	3.66717	0	0	0	0	0	#DIV/0!	Ssa11005757,cell wall organization,DUF588
Ssa06018851	60.119	195.87	219.536	158.508	2506.44	1338.84	2194.43	2013.24	12.7011	3.66689	173.981	152.92	111.025	145.975	0.920932	3.78572	Ssa06018851,sodium-coupled neutral amino acid transporter,Aa_trans
Ssa02009988	4.412	4.894	8.891	6.06567	54.965	62.048	113.875	76.9627	12.6882	3.66542	216.654	196.46	123.423	178.846	29.4849	-1.21648	Ssa02009988,F-box kelch-repeat protein,"F-box,FBA_1,FBA_3"
Ssa09024942	0	0.93	0.217	0.382333	7.081	0	7.387	4.82267	12.6138	3.65693	12.344	11.383	5.145	9.624	25.1718	-0.996806	Ssa09024942,-,-
Ssa10003129	0	0.029	0	0.00966667	0.018	0.282	0.062	0.120667	12.4828	3.64186	0.544	0.487	0.451	0.494	51.1034	-2.03348	Ssa10003129,Belongs to the major facilitator superfamily. Sugar transporter (TC 2.A.1.1) family,Sugar_tr
Ssa03012651	3.115	0.741	10.747	4.86767	0.076	181.665	0.088	60.6097	12.4515	3.63825	0	0	0	0	0	#DIV/0!	Ssa03012651,Belongs to the expansin family,"DPBB_1,Pollen_allerg_1"
Ssa03014205	24.551	14.236	13.163	17.3167	139.903	223.687	282.245	215.278	12.4319	3.63597	105.185	139.881	66.608	103.891	5.9995	1.05113	Ssa03014205,Belongs to the iron ascorbate-dependent oxidoreductase family,"2OG-FeII_Oxy,DIOX_N"
Ssa03014146	85.549	135.348	108.194	109.697	997.877	915.696	2174.44	1362.67	12.4221	3.63484	0.468	2.487	5.109	2.688	0.0245039	8.98569	Ssa03014146,MLP-like protein,Bet_v_1
Ssa11005272	0.562	0.106	1.112	0.593333	2.013	20.061	0	7.358	12.4011	3.6324	0.103	0	0	0.0343333	0.0578652	7.74356	Ssa11005272,14 kDa proline-rich protein DC2.15-like,Hydrophob_seed
Ssa08022097	0	0	0.04	0.0133333	0.146	0.326	0.024	0.165333	12.4	3.63227	0	0	0	0	0	#DIV/0!	Ssa08022097,LRR receptor-like serine threonine-protein kinase,"LRRNT_2,LRR_1,LRR_4,LRR_6,LRR_8"
Ssa02011539	5.371	5.769	8.86	6.66667	59.997	74.399	113.541	82.6457	12.3969	3.6319	242.257	238.41	217.596	232.754	34.9132	-1.4938	Ssa02011539,Belongs to the cytochrome P450 family,p450
Ssa08022075	5.331	5.828	8.895	6.68467	60.198	74.471	113.731	82.8	12.3866	3.6307	243.39	239.799	218.48	233.89	34.989	-1.49813	Ssa08022075,Belongs to the cytochrome P450 family,p450
Ssa09024896	12.09	6.763	7.294	8.71567	39.726	168.294	114.903	107.641	12.3503	3.62647	6.772	6.297	3.821	5.63	0.645963	4.25695	Ssa09024896,RING-H2 finger protein,zf-RING_2
Ssa02010020	99.108	82.503	93.89	91.8337	1148.99	935.781	1302.8	1129.19	12.296	3.62012	315.956	398.846	326.948	347.25	3.78129	1.70124	Ssa02010020,Stem-specific protein,DUF3700
Ssa11005038	17.993	11.09	13.341	14.1413	212.881	138.718	169.119	173.573	12.2741	3.61755	48.827	48.692	51.874	49.7977	3.52143	1.80139	Ssa11005038,Nicotinate,NAPRTase
Ssa04015043	0.129	0	0.113	0.0806667	0.624	0.93	1.407	0.987	12.2355	3.61301	0.803	0.653	0.744	0.733333	9.09091	0.428581	Ssa04015043,alpha/beta hydrolase fold,Abhydrolase_3
Ssa01000763	0	0	0.157	0.0523333	0.824	0.322	0.762	0.636	12.1529	3.60322	0.917	1.114	0.963	0.998	19.0701	-0.650013	Ssa01000763,Belongs to the multi antimicrobial extrusion (MATE) (TC 2.A.66.1) family,MatE
Ssa02009583	6.896	6.058	10.112	7.68867	81.147	163.717	34.587	93.1503	12.1153	3.59876	0	0	0	0	0	#DIV/0!	Ssa02009583,Heavy-metal-associated domain,HMA
Ssa01000061	0.598	0	0.263	0.287	2.906	5.683	1.838	3.47567	12.1103	3.59817	0	0.117	0	0.039	0.135889	6.47767	Ssa01000061,Belongs to the protein kinase superfamily. Ser Thr protein kinase family,"LRRNT_2,LRR_1,LRR_6,LRR_8,Pkinase"
Ssa01000848	1.576	0.819	2.145	1.51333	16.673	28.603	9.66	18.312	12.1004	3.59699	0.11	0.41	0.087	0.202333	0.1337	6.49991	Ssa01000848,Regulatory protein,"Ank_2,Ank_3,BTB,DUF3420"
Ssa01002437	1.151	0.173	0.608	0.644	3.461	7.602	12.241	7.768	12.0621	3.59241	7.11	7.917	1.599	5.542	8.60559	0.487136	Ssa01002437,Ocs element-binding factor,bZIP_1
Ssa09025710	14.338	22.838	24.158	20.4447	197.06	439.201	102.408	246.223	12.0434	3.59017	92.985	94.087	75.999	87.6903	4.28915	1.48948	Ssa09025710,"Nitrate reductase is a key enzyme involved in the first step of nitrate assimilation in plants, fungi and bacteria","Cyt-b5,FAD_binding_6,Mo-co_dimer,NAD_binding_1,Oxidored_molyb"
Ssa02011961	0.448	0.284	0.062	0.264667	3.312	3.622	2.618	3.184	12.0302	3.58859	0.346	0.221	0.182	0.249667	0.943325	3.67277	Ssa02011961,-,Ada3
Ssa02009697	0.157	0.511	0.689	0.452333	6.581	7.675	2.05	5.43533	12.0162	3.58691	0.019	0.041	0.02	0.0266667	0.0589536	7.67119	Ssa02009697,Belongs to the protein kinase superfamily. Ser Thr protein kinase family,"LRRNT_2,LRR_1,LRR_6,LRR_8,Pkinase"
Ssa03013919	15.549	2.838	6.633	8.34	89.233	148.085	63.177	100.165	12.0102	3.58619	0	0	0	0	0	#DIV/0!	Ssa03013919,Phytosulfokine precursor protein (PSK),PSK
Ssa10004516	2.153	0.519	0.682	1.118	9.439	6.543	24.244	13.4087	11.9934	3.58417	0	0	0.066	0.022	0.019678	9.25145	Ssa10004516,NAC transcription factor,NAM
Ssa03013799	7.376	4.379	3.369	5.04133	54.643	50.416	76.227	60.4287	11.9866	3.58336	257.333	228.12	48.107	177.853	35.279	-1.55738	Ssa03013799,NAC transcription factor,NAM
Ssa11005776	63.262	39.175	56.178	52.8717	24.973	1868.52	3.895	632.464	11.9622	3.58042	0	0	0	0	0	#DIV/0!	Ssa11005776,lipid-transfer protein,LTP_2
Ssa05015797	7.195	10.173	11.187	9.51833	103.668	136.268	101.491	113.809	11.9568	3.57976	4.09	4.837	5.229	4.71867	0.495745	4.59209	Ssa05015797,Belongs to the cytochrome P450 family,p450
Ssa10003482	6.832	6.002	19.398	10.744	91.677	177.883	115.297	128.286	11.9402	3.57776	1.674	3.801	3.435	2.97	0.276433	5.43275	Ssa10003482,Cell wall vacuolar inhibitor of fructosidase,PMEI
Ssa02010399	0.124	0.187	0.219	0.176667	2.126	1.011	3.185	2.10733	11.9283	3.57632	0	0.291	0	0.097	0.549057	4.44129	Ssa02010399,-,-
Ssa02011516	0	0	0.04	0.0133333	0.125	0.326	0.024	0.158333	11.875	3.56986	0	0	0	0	0	#DIV/0!	Ssa02011516,LRR receptor-like serine threonine-protein kinase,"LRRNT_2,LRR_1,LRR_4,LRR_6,LRR_8"
Ssa07020701	6.26	4.778	3.169	4.73567	28.556	13.341	126.487	56.128	11.8522	3.56708	415.5	457.82	238.378	370.566	78.25	-2.72294	Ssa07020701,PLATZ transcription factor,PLATZ
Ssa09025925	0.195	0	0	0.065	0.181	0.353	1.773	0.769	11.8308	3.56447	0	0.458	0.151	0.203	3.12308	1.9215	Ssa09025925,auxin-induced protein,Auxin_inducible
Ssa10004261	6.286	3.063	6.414	5.25433	33.103	108.835	44.191	62.043	11.808	3.56169	0	0	0	0	0	#DIV/0!	Ssa10004261,Removes the phosphate from trehalose 6-phosphate to produce free trehalose,Trehalose_PPase
Ssa10003825	0.469	0.795	0.206	0.49	9.791	6.338	1.206	5.77833	11.7925	3.5598	0	0	0	0	0	#DIV/0!	Ssa10003825,"cla,cla1,def,dxps2,dxs","DXP_synthase_N,Transket_pyr,Transketolase_C"
Ssa06018688	1.108	1.376	1.218	1.234	14.654	13.978	14.914	14.5153	11.7628	3.55616	3.502	5.713	16.544	8.58633	6.95813	0.757464	Ssa06018688,WAT1-related protein,EamA
Ssa07020320	0.141	0	0.249	0.13	0.327	1.534	2.718	1.52633	11.741	3.55349	0.727	1.104	1.2	1.01033	7.77179	0.595239	Ssa07020320,Protodermal factor,-
Ssa01001261	2.124	5.391	5.226	4.247	53.635	55.327	40.581	49.8477	11.7371	3.55301	4.801	5.133	6.891	5.60833	1.32054	3.15188	Ssa01001261,ZINC FINGER protein,"zf-C2H2,zf-C2H2_jaz"
Ssa11005597	8.803	6.925	8.669	8.13233	96.43	57.157	131.038	94.875	11.6664	3.54429	0.097	0.205	0	0.100667	0.0123786	9.8803	Ssa11005597,-,-
Ssa09024381	0.732	0.195	0.379	0.435333	2.728	2.96	9.523	5.07033	11.647	3.54189	24.594	21.934	12.428	19.652	45.1424	-1.95452	Ssa09024381,belongs to the protein kinase superfamily,Pkinase
Ssa01000723	0	0	0.027	0.009	0.028	0.22	0.065	0.104333	11.5926	3.53513	0	0	0	0	0	#DIV/0!	Ssa01000723,Plant protein of unknown function (DUF639),DUF639
Ssa05017327	0.58	0.291	1.361	0.744	15.381	7.87	2.582	8.611	11.5739	3.53281	7.249	5.59	2.387	5.07533	6.82168	0.762678	Ssa05017327,auxin-induced protein,Auxin_inducible
Ssa09025315	2.099	2.603	3.15	2.61733	24.839	21.217	44.786	30.2807	11.5693	3.53223	13.614	13.505	4.478	10.5323	4.02407	1.52357	Ssa09025315,Protein of unknown function (DUF1677),DUF1677
Ssa01000203	2.985	2.166	2.787	2.646	25.676	50.706	15.344	30.5753	11.5553	3.53048	9.393	6.343	12.249	9.32833	3.52545	1.71268	Ssa01000203,3'-5' exonuclease,DNA_pol_A_exo1
Ssa01001956	0.761	0.621	1.619	1.00033	8.745	7.002	18.915	11.554	11.5501	3.52984	463.802	520.557	411.777	465.379	465.224	-5.33194	Ssa01001956,Methylecgonone reductase-like,Aldo_ket_red
Ssa10003965	0.133	0.2	0.059	0.130667	2.154	0.181	2.168	1.501	11.4872	3.52196	0.44	0.104	0.668	0.404	3.09184	1.8935	Ssa10003965,BEST Arabidopsis thaliana protein match is Sterile alpha motif (SAM) domain-containing protein (TAIR AT1G15760.1),SAM_2
Ssa06018911	1.185	1.695	1.042	1.30733	4.986	5.358	34.556	14.9667	11.4482	3.51705	0.261	0	0.091	0.117333	0.0897501	6.995	Ssa06018911,purine permease,PUNUT
Ssa02011603	0	0	0.115	0.0383333	0.543	0.354	0.418	0.438333	11.4348	3.51536	0	0	0	0	0	#DIV/0!	Ssa02011603,-,-
Ssa08022015	0	0	0.115	0.0383333	0.543	0.354	0.418	0.438333	11.4348	3.51536	0	0	0	0	0	#DIV/0!	Ssa08022015,-,-
Ssa01002838	36.185	21.658	108.532	55.4583	595.909	919.805	379.56	631.758	11.3916	3.5099	0	0	0	0	0	#DIV/0!	Ssa01002838,Belongs to the cytochrome P450 family,p450
Ssa03012758	1.82	2.354	1.462	1.87867	32.572	17.177	14.437	21.3953	11.3886	3.50952	0	0.062	0	0.0206667	0.0110007	10.0158	Ssa03012758,Protein TPX2-like isoform X1,TPX2_importin
Ssa11005777	0	0	9.9	3.3	1.115	111.587	0	37.5673	11.384	3.50894	0	0	0	0	0	#DIV/0!	Ssa11005777,lipid-transfer protein,LTP_2
Ssa03013717	0.048	0.073	0.213	0.111333	1.008	1.008	1.786	1.26733	11.3832	3.50884	15.957	19.685	21.538	19.06	171.198	-3.91068	Ssa03013717,Belongs to the NPH3 family,NPH3
Ssa01000881	0	0.143	0.167	0.103333	2.194	0.515	0.811	1.17333	11.3548	3.50524	0.279	0	0.439	0.239333	2.31613	2.29352	Ssa01000881,-,-
Ssa13008346	20.071	38.19	35.284	31.1817	339.045	311.119	411.61	353.925	11.3504	3.50467	93.011	72.829	87.603	84.481	2.70932	2.06674	Ssa13008346,alanine aminotransferase,Aminotran_1_2
Ssa01002007	0	0	0.09	0.03	0	1.02	0	0.34	11.3333	3.5025	0	0	0	0	0	#DIV/0!	Ssa01002007,Soybean trypsin inhibitor (Kunitz) family of protease inhibitors,Kunitz_legume
Ssa01002212	0.687	0.388	0.332	0.469	6.939	7.173	1.834	5.31533	11.3333	3.5025	0	0.027	0	0.009	0.0191898	9.20602	Ssa01002212,ABC transporter G family member,"ABC2_membrane,ABC_tran"
Ssa09024511	1.133	2.146	1.359	1.546	20.546	14.314	17.606	17.4887	11.3122	3.49981	0	0	0.132	0.044	0.0284605	8.6347	Ssa09024511,receptor-like protein kinase,"LRR_1,LRR_4,LRR_8,Pkinase,Pkinase_Tyr"
Ssa05017123	0.903	0.544	0.159	0.535333	6.222	6.86	5.065	6.049	11.2995	3.49819	0.199	0.282	0.348	0.276333	0.516189	4.45222	Ssa05017123,LOB domain-containing protein,LOB
Ssa11005508	0.042	0	0.148	0.0633333	1.365	0.572	0.203	0.713333	11.2632	3.49354	0	0	0	0	0	#DIV/0!	Ssa11005508,Belongs to the multi antimicrobial extrusion (MATE) (TC 2.A.66.1) family,MatE
Ssa03014201	17.08	8.624	4.95	10.218	21.467	36.348	287.144	114.986	11.2533	3.49228	15.953	18.054	18.918	17.6417	1.72653	2.7044	Ssa03014201,-,-
Ssa13008452	0.598	2.056	1.547	1.40033	17.92	23.578	5.754	15.7507	11.2478	3.49157	34.367	24.049	15.817	24.7443	17.6703	-0.651685	Ssa13008452,ZINC FINGER protein,"zf-C2H2,zf-C2H2_jaz"
Ssa10003275	0.049	0	0	0.0163333	0.136	0.31	0.105	0.183667	11.2449	3.4912	0.18	0.192	0.946	0.439333	26.898	-1.25823	Ssa10003275,Encoded by,Mem_trans
Ssa06017910	0.861	2.054	1.105	1.34	16.219	15.064	13.902	15.0617	11.24	3.49058	0	0	0	0	0	#DIV/0!	Ssa06017910,protein NRT1 PTR FAMILY 5.2-like,PTR2
Ssa13008602	0.048	0.073	0.213	0.111333	1.008	1.008	1.734	1.25	11.2275	3.48897	15.779	19.685	21.725	19.063	171.225	-3.93078	Ssa13008602,Belongs to the NPH3 family,NPH3
Ssa06018550	0.077	0.407	0.747	0.410333	4.963	3.7	5.134	4.599	11.208	3.48645	54.705	54.463	43.429	50.8657	123.962	-3.4673	Ssa06018550,Transcription factor,HLH
Ssa12007835	0.038	1.152	0	0.396667	12.485	0.795	0	4.42667	11.1597	3.48022	0	0	0	0	0	#DIV/0!	Ssa12007835,Belongs to the multi antimicrobial extrusion (MATE) (TC 2.A.66.1) family,MatE
Ssa03012606	3.976	6.452	2.744	4.39067	20.987	11.966	113.793	48.9153	11.1408	3.47777	26.581	16.281	17.933	20.265	4.61547	1.2713	Ssa03012606,Protein NRT1 PTR FAMILY,PTR2
Ssa02010870	0	0	0.066	0.022	0.277	0.338	0.12	0.245	11.1364	3.47721	0	0	0	0	0	#DIV/0!	Ssa02010870,ZINC FINGER protein,zf-C2H2_6
Ssa01001032	0.469	0.997	0.607	0.691	7.744	7.859	7.471	7.69133	11.1307	3.47648	89.386	64.269	88.749	80.8013	116.934	-3.39307	Ssa01001032,ABC transporter G family member,"ABC2_membrane,ABC_tran"
Ssa08023198	0.964	1.146	1.183	1.09767	9.913	15.05	11.586	12.183	11.099	3.47236	0.131	0.119	0.215	0.155	0.141209	6.29646	Ssa08023198,Potassium channel,"Ank_2,Ank_4,Ion_trans,KHA,cNMP_binding"
Ssa04015587	41.484	25.804	76.601	47.963	289.069	1146.64	151.885	529.199	11.0335	3.46382	33.388	31.899	29.862	31.7163	0.661267	4.06051	Ssa04015587,Auxin responsive protein,Auxin_inducible
Ssa05015960	0	0.54	1.009	0.516333	5.303	11.537	0.23	5.69	11.02	3.46205	0	0	0	0	0	#DIV/0!	Ssa05015960,TIFY 5A-like,"CCT_2,tify"
Ssa03014025	1.583	2.509	2.052	2.048	24.391	29.313	13.842	22.5153	10.9938	3.45862	0.184	0.195	0.386	0.255	0.124512	6.46427	Ssa03014025,ZINC FINGER protein,zf-C2H2_6
Ssa03012266	0.256	0.064	0.262	0.194	2.306	2.428	1.662	2.132	10.9897	3.45808	3.101	3.163	2.499	2.921	15.0567	-0.454255	Ssa03012266,Senescence-associated protein,Senescence
Ssa09025248	0.16	0.241	0.141	0.180667	1.407	1.883	2.652	1.98067	10.9631	3.45458	0	0	0	0	0	#DIV/0!	Ssa09025248,-,-
Ssa03014212	0.033	0	0.058	0.0303333	0.167	0.148	0.682	0.332333	10.956	3.45366	317.315	271.203	202.89	263.803	8696.79	-9.63261	Ssa03014212,Pentatricopeptide repeat-containing protein At5g13770,"PPR,PPR_2"
Ssa03013427	0	0	0.127	0.0423333	0.1	1.175	0.116	0.463667	10.9528	3.45322	9.974	11.221	11.64	10.945	258.543	-4.56104	Ssa03013427,2-alkenal reductase (NADP( )-dependent)-like,"ADH_N_2,ADH_zinc_N"
Ssa13008885	0	0	0.127	0.0423333	0.1	1.175	0.116	0.463667	10.9528	3.45322	10.027	11.108	11.807	10.9807	259.386	-4.56573	Ssa13008885,2-alkenal reductase (NADP( )-dependent)-like,"ADH_N_2,ADH_zinc_N"
Ssa03012226	4.868	1.736	6.48	4.36133	2.251	140.188	0.684	47.7077	10.9388	3.45138	0.706	0.651	0.593	0.65	0.149037	6.19764	Ssa03012226,Endochitinase,"Chitin_bind_1,Glyco_hydro_19"
Ssa06018816	0.264	0	0.465	0.243	2.202	2.87	2.896	2.656	10.93	3.45023	2.041	1.653	10	4.56467	18.7846	-0.781254	Ssa06018816,Protein CHLORORESPIRATORY REDUCTION 7,CRR7
Ssa03012614	4.756	4.892	3.035	4.22767	51.871	37.711	48.931	46.171	10.9212	3.44905	21.517	22.895	10.028	18.1467	4.29236	1.34728	Ssa03012614,Methyltransferase,Methyltransf_29
Ssa06019003	4.032	1.434	1.577	2.34767	17.249	30.49	29.018	25.5857	10.8983	3.44604	11.197	9.275	12.619	11.0303	4.69842	1.21386	Ssa06019003,Abscisic acid receptor,Polyketide_cyc2
Ssa04015217	41.417	9.755	93.432	48.2013	257.257	912.458	404.831	524.849	10.8887	3.44476	0.312	0.415	0.328	0.351667	0.00729579	10.5435	Ssa04015217,-,-
Ssa10003057	0.985	0.223	0.607	0.605	1.322	17.379	1	6.567	10.8545	3.44023	0.145	0.231	0.152	0.176	0.290909	5.22159	Ssa10003057,Protein of unknown function (DUF679),DUF679
Ssa08022610	0.623	1.47	1.462	1.185	21.714	12.114	4.704	12.844	10.8388	3.43814	1.664	1.785	1.811	1.75333	1.47961	2.87292	Ssa08022610,Probably inactive leucine-rich repeat receptor-like protein kinase,"LRRNT_2,LRR_1,LRR_6,LRR_8,Pkinase"
Ssa08023073	22.334	18.768	9.451	16.851	130.635	126.181	289.634	182.15	10.8094	3.43422	617.388	672.302	717.576	669.089	39.7062	-1.87707	Ssa08023073,Non-specific serine threonine protein kinase,"NAF,Pkinase"
Ssa07020847	52.704	55.5	50.177	52.7937	373.21	901.534	433.405	569.383	10.7851	3.43096	3.743	4.923	3.438	4.03467	0.0764233	7.14081	Ssa07020847,cinnamoyl-CoA reductase 1-like,Epimerase
Ssa11005783	0.085	0.257	0.637	0.326333	5.242	3.199	2.117	3.51933	10.7845	3.43088	0.595	0.666	1.348	0.869667	2.66496	2.01677	Ssa11005783,C2H2-type zinc finger,zf-C2H2_6
Ssa03012415	17.874	3.051	60.387	27.104	47.174	766.065	62.257	291.832	10.7671	3.42856	0	0	0	0	0	#DIV/0!	Ssa03012415,-,-
Ssa12007225	60.721	36.89	81.869	59.8267	575.73	813.658	536.503	641.964	10.7304	3.42363	31.906	35.195	32.226	33.109	0.553415	4.2772	Ssa12007225,Protein of unknown function (DUF1218),DUF1218
Ssa02010581	0.049	0.073	0.128	0.0833333	0	1.145	1.534	0.893	10.716	3.42169	3.615	2.13	7.138	4.29433	51.532	-2.2657	Ssa02010581,Methylthioribose kinase-like,APH
Ssa01002255	0.265	0.022	0.104	0.130333	2.016	0.852	1.321	1.39633	10.7136	3.42137	0	0.023	0.045	0.0226667	0.173913	5.94493	Ssa01002255,L-type lectin-domain containing receptor kinase,"Lectin_legB,Pkinase,Pkinase_Tyr"
Ssa05016381	0	0.166	0	0.0553333	0.51	0.797	0.471	0.592667	10.7108	3.421	0.162	0	0	0.054	0.975904	3.45619	Ssa05016381,G-type lectin S-receptor-like serine threonine-protein kinase,"B_lectin,DUF3403,PAN_2,Pkinase_Tyr,S_locus_glycop"
Ssa10003661	1.467	1.686	1.902	1.685	24.92	25.868	3.258	18.0153	10.6916	3.4184	0	0	0.119	0.0396667	0.023541	8.82708	Ssa10003661,Cytokinin dehydrogenase,"Cytokin-bind,FAD_binding_4"
Ssa05017326	4.043	1.365	5.029	3.479	47.653	19.168	44.467	37.096	10.6628	3.41452	21.216	16.667	22.811	20.2313	5.81527	0.874672	Ssa05017326,Indole-3-acetic acid-induced protein ARG7-like,Auxin_inducible
Ssa11005514	5.611	2.673	10.275	6.18633	6.143	181.955	9.787	65.9617	10.6625	3.41447	0	0	0	0	0	#DIV/0!	Ssa11005514,Thaumatin family,Thaumatin
Ssa09024608	0.253	0.286	0.445	0.328	2.34	6.179	1.96	3.493	10.6494	3.4127	3660.28	3816.51	5304.5	4260.43	12989.1	-10.2523	Ssa09024608,Photosystem I reaction center subunit V,PSI_PSAK
Ssa10003401	0.218	0.055	0.16	0.144333	1.778	2.329	0.504	1.537	10.649	3.41264	0.027	0.057	0	0.028	0.193995	5.77855	Ssa10003401,Pectinesterase,"PMEI,Pectinesterase"
Ssa08023493	9.486	9.75	4.874	8.03667	32.952	12.149	211.509	85.5367	10.6433	3.41187	123.231	105.169	148.497	125.632	15.6324	-0.554593	Ssa08023493,-,-
Ssa04014487	0.251	0.944	1.765	0.986667	0.331	30.982	0.115	10.476	10.6176	3.40838	0	0	0	0	0	#DIV/0!	Ssa04014487,Belongs to the multicopper oxidase family,"Cu-oxidase,Cu-oxidase_2,Cu-oxidase_3"
Ssa06017957	2.961	2.401	3.106	2.82267	1.632	88.052	0.182	29.9553	10.6124	3.40768	0	0	0	0	0	#DIV/0!	Ssa06017957,ZINC FINGER protein,zf-C2H2_6
Ssa06018936	0.837	0.525	0.859	0.740333	9.608	10.088	3.873	7.85633	10.6119	3.40761	0.102	0	0	0.034	0.0459253	7.85218	Ssa06018936,Belongs to the iron ascorbate-dependent oxidoreductase family,"2OG-FeII_Oxy,DIOX_N"
Ssa11005199	13.378	10.35	45.351	23.0263	202.974	216.675	310.704	243.451	10.5727	3.40227	4.06	4.603	4.83	4.49767	0.195327	5.75831	Ssa11005199,"zinc-finger of the FCS-type, C2-C2",zf-FLZ
Ssa11005567	0.117	0	0	0.039	0.406	0.794	0.031	0.410333	10.5214	3.39525	0	0	0	0	0	#DIV/0!	Ssa11005567,Transcription factor,Myb_DNA-binding
Ssa02010015	1.995	1.502	3.115	2.204	27.999	18.312	23.23	23.1803	10.5174	3.39471	8.835	6.896	7.812	7.84767	3.56065	1.56257	Ssa02010015,Belongs to the peptidase A1 family,"TAXi_C,TAXi_N"
Ssa02012046	2.025	7.512	5.771	5.10267	64.046	51.183	45.25	53.493	10.4833	3.39003	58.245	44.851	54.939	52.6783	10.3237	0.0221404	Ssa02012046,Auxin response factors (ARFs) are transcriptional factors that bind specifically to the DNA sequence 5'-TGTCTC-3' found in the auxin-responsive promoter elements (AuxREs),"Auxin_resp,B3"
Ssa13008348	22.692	14.661	11.721	16.358	138.866	91.098	283.815	171.26	10.4695	3.38812	394.532	458.438	369.436	407.469	24.9094	-1.2505	Ssa13008348,-,-
Ssa04014844	37.853	24.47	19.494	27.2723	276.255	92.018	487.676	285.316	10.4618	3.38705	67.461	99.254	99.461	88.7253	3.25331	1.68514	Ssa04014844,"zinc-finger of the FCS-type, C2-C2",zf-FLZ
Ssa10003735	10.248	6.355	7.16	7.921	18.261	211.543	18.195	82.6663	10.4364	3.38355	0.665	0.706	0	0.457	0.0576947	7.49896	Ssa10003735,-,-
Ssa12007764	0	0.03	0	0.01	0.111	0.181	0.021	0.104333	10.4333	3.38313	0	0	0.093	0.031	3.1	1.75086	Ssa12007764,Salicylate,Methyltransf_7
Ssa09024898	0.824	0.31	0.362	0.498667	3.382	7.545	4.622	5.183	10.3937	3.37764	15.445	17.462	22.891	18.5993	37.2981	-1.84339	Ssa09024898,LOB domain-containing protein,LOB
Ssa03013699	20.984	8.084	9.159	12.7423	103.441	102.985	190.652	132.359	10.3874	3.37676	59.669	71.043	77.829	69.5137	5.45533	0.929091	Ssa03013699,Domain of unknown function (DUF4666),DUF4666
Ssa13008620	20.821	8.206	9.159	12.7287	102.613	102.985	190.305	131.968	10.3678	3.37403	58.951	71.043	77.578	69.1907	5.43581	0.931535	Ssa13008620,Domain of unknown function (DUF4666),DUF4666
Ssa09025222	56.229	31.475	23.015	36.9063	327.833	591.608	226.112	381.851	10.3465	3.37107	11.399	10.535	11.863	11.2657	0.30525	5.08301	Ssa09025222,-,DUF688
Ssa02011006	0	0.082	0	0.0273333	0.201	0.588	0.058	0.282333	10.3293	3.36867	0	0	0	0	0	#DIV/0!	Ssa02011006,"Dirigent proteins impart stereoselectivity on the phenoxy radical-coupling reaction, yielding optically active lignans from two molecules of coniferyl alcohol in the biosynthesis of lignans, flavonolignans, and alkaloids and thus plays a central role in plant secondary metabolism",Dirigent
Ssa11005598	2.028	1.56	1.474	1.68733	20.262	11.083	20.933	17.426	10.3275	3.36842	0.032	0.069	0.034	0.045	0.0266693	8.5971	Ssa11005598,Transcription factor,"DOG1,bZIP_1,bZIP_2"
Ssa11005628	34.199	34.393	28.216	32.2693	333.324	392.126	272.485	332.645	10.3084	3.36575	163.079	128.046	111.516	134.214	4.15917	1.30945	Ssa11005628,Phosphoenolpyruvate carboxylase,PEPcase
Ssa07020014	0.368	0.246	1.836	0.816667	2.895	19.055	3.3	8.41667	10.3061	3.36543	0	0	0	0	0	#DIV/0!	Ssa07020014,Belongs to the cytochrome P450 family,p450
Ssa10004390	2.143	3.087	2.678	2.636	34.325	37.777	9.274	27.1253	10.2903	3.36322	4.383	4.028	2.756	3.72233	1.41211	2.86536	Ssa10004390,ABC transporter G family member,"ABC2_membrane,ABC_tran"
Ssa07020013	0.205	0.092	1.62	0.639	1.476	16.539	1.683	6.566	10.2754	3.36113	0	0	0	0	0	#DIV/0!	Ssa07020013,Belongs to the cytochrome P450 family,p450
Ssa04015405	37.61	17.215	20.115	24.98	279.519	161.758	325.653	255.643	10.2339	3.35529	0.895	1.374	2.245	1.50467	0.0602349	7.40854	Ssa04015405,Inositol oxygenase 1-like,MIOX
Ssa10003867	0.12	0.023	0	0.0476667	0.387	0.866	0.208	0.487	10.2168	3.35287	0.198	0.117	0.046	0.120333	2.52448	2.01689	Ssa10003867,L-type lectin-domain containing receptor kinase,"Lectin_legB,Pkinase,Pkinase_Tyr"
Ssa02011849	41.433	9.957	136.503	62.631	251.752	1401.06	265.367	639.393	10.2089	3.35175	0	0	0	0	0	#DIV/0!	Ssa02011849,Wound induced protein,DUF3774
Ssa11005636	6.281	4.398	3.49	4.723	33.1	30.597	80.852	48.183	10.2018	3.35075	10.125	10.116	9.439	9.89333	2.09471	2.284	Ssa11005636,-,-
Ssa09024056	1.875	2.07	5.278	3.07433	16.357	22.38	55.213	31.3167	10.1865	3.34859	56.133	57.316	35.588	49.679	16.1593	-0.665705	Ssa09024056,E3 ubiquitin-protein ligase,zf-RING_2
Ssa09024944	1.469	1.527	1.446	1.48067	13.41	18.727	13.042	15.0597	10.1709	3.34637	5.811	5.93	3.617	5.11933	3.45745	1.55666	Ssa09024944,Adenine guanine permease,Xan_ur_permease
Ssa02010418	24.855	25.983	36.255	29.031	203.988	430.691	248.114	294.264	10.1362	3.34145	117.727	98.782	101.962	106.157	3.65668	1.47091	Ssa02010418,"Catalytic subunit of pyrophosphate--fructose 6-phosphate 1-phosphotransferase. Catalyzes the phosphorylation of D-fructose 6-phosphate, the first committing step of glycolysis. Uses inorganic phosphate (PPi) as phosphoryl donor instead of ATP like common ATP-dependent phosphofructokinases (ATP-PFKs), which renders the reaction reversible, and can thus function both in glycolysis and …
Ssa10003298	0.427	1.527	2.724	1.55933	16.094	17.379	13.629	15.7007	10.0688	3.33182	0.157	0.167	0	0.108	0.0692604	7.18365	Ssa10003298,Protein LIGHT-DEPENDENT SHORT HYPOCOTYLS,DUF640
Ssa01002595	11.292	3.287	4.675	6.418	82.414	85.563	25.649	64.542	10.0564	3.33004	2.023	4.3	8.201	4.84133	0.754337	3.73676	Ssa01002595,LOB domain-containing protein,LOB
Ssa09025766	3.893	4.763	2.947	3.86767	26.266	33.994	56.351	38.8703	10.0501	3.32913	2.609	2.594	5.589	3.59733	0.930104	3.43367	Ssa09025766,WD40-like Beta Propeller Repeat,PD40
Ssa02009752	0.029	0.066	0.102	0.0656667	1.266	0.448	0.264	0.659333	10.0406	3.32777	26.795	23.451	23.321	24.5223	373.437	-5.21694	Ssa02009752,ABC transporter G family member,"ABC2_membrane,ABC_tran"
Ssa01001152	7.993	3.858	5.77	5.87367	30.806	99.916	46.095	58.939	10.0344	3.32689	10.848	10.729	8.383	9.98667	1.70024	2.56115	Ssa01001152,Phytosulfokine precursor protein (PSK),PSK
Ssa04015731	1.392	1.238	1.558	1.396	11.936	16.821	13.179	13.9787	10.0134	3.32386	62.034	70.478	293.002	141.838	101.603	-3.34295	Ssa04015731,Protein CURVATURE THYLAKOID 1A,CAAD
Ssa05016667	5.231	5.506	4.226	4.98767	63.168	42.723	43.853	49.9147	10.0076	3.32303	0	0	0	0	0	#DIV/0!	Ssa05016667,transcription factor,AP2
Ssa10003465	0	0.048	0	0.016	0.089	0.289	0.102	0.16	10	3.32193	0	0	0	0	0	#DIV/0!	Ssa10003465,Belongs to the iron ascorbate-dependent oxidoreductase family,"2OG-FeII_Oxy,DIOX_N"
Ssa10004036	51.17	30.971	45.76	42.6337	147.897	522.599	606.622	425.706	9.98521	3.31979	1.858	3.51	3.25	2.87267	0.0673802	7.21132	Ssa10004036,Heme oxygenase 1,Heme_oxygenase
Ssa07020098	0	0.082	0.096	0.0593333	0.553	0.787	0.436	0.592	9.97753	3.31868	0	0	0	0	0	#DIV/0!	Ssa07020098,GDSL esterase lipase At1g71250-like,Lipase_GDSL
Ssa01001746	2.438	3.647	1.942	2.67567	22.524	17.047	40.416	26.6623	9.96474	3.31683	164.644	163.789	127.705	152.046	56.8255	-2.51163	Ssa01001746,Pentatricopeptide repeat-containing protein,"PPR,PPR_1,PPR_2,PPR_3,Pkinase"
Ssa06018415	0.544	2.185	0.798	1.17567	8.053	11.975	15.115	11.7143	9.96399	3.31672	17.867	16.58	9.658	14.7017	12.505	-0.327705	Ssa06018415,-,-
Ssa06018327	1.215	0.772	0.902	0.963	13.639	9.063	6.022	9.57467	9.94254	3.31361	0	0.03	0.029	0.0196667	0.0204223	8.92733	Ssa06018327,-,Rho_N
Ssa08023289	1.543	0.929	1.318	1.26333	14.453	10.205	12.856	12.5047	9.89815	3.30716	6.415	5.717	4.014	5.382	4.26016	1.21625	Ssa08023289,ZINC FINGER protein,zf-C2H2_6
Ssa06017422	0.953	0.144	0.923	0.673333	0.617	14.916	4.431	6.65467	9.88317	3.30497	1436.1	1409.39	1709.32	1518.27	2254.86	-7.83385	Ssa06017422,Photosystem I reaction center subunit XI,PsaL
Ssa05016589	0	0.048	0	0.016	0.176	0.23	0.068	0.158	9.875	3.30378	0	0	0	0	0	#DIV/0!	Ssa05016589,F-box kelch-repeat protein,F-box
Ssa13008415	2.701	1.105	0.827	1.54433	11.679	8.817	25.224	15.24	9.86834	3.30281	15.11	16.747	17.04	16.299	10.5541	-0.0969206	Ssa13008415,Belongs to the mitochondrial carrier (TC 2.A.29) family,Mito_carr
Ssa09024871	0.938	0.326	0.635	0.633	5.908	8.942	3.778	6.20933	9.80937	3.29416	457.412	444.539	565.564	489.172	772.783	-6.29976	Ssa09024871,"The light-harvesting complex (LHC) functions as a light receptor, it captures and delivers excitation energy to photosystems with which it is closely associated",Chloroa_b-bind
Ssa12007899	34.275	22.955	21.063	26.0977	169.824	87.079	510.372	255.758	9.80005	3.29279	108.506	109.671	71.774	96.6503	3.70341	1.40393	Ssa12007899,-,-
Ssa06018188	4.663	1.755	2.735	3.051	27.404	35.142	27.139	29.895	9.79843	3.29255	17.352	18.594	21.589	19.1783	6.28592	0.640427	Ssa06018188,-,-
Ssa02011964	0	0.087	0	0.029	0.107	0.312	0.431	0.283333	9.77011	3.28838	0.085	0	0	0.0283333	0.977011	3.32193	Ssa02011964,Phosphatidylethanolamine-binding protein,PBP
Ssa06018735	19.312	17.996	74.864	37.3907	429.084	372.084	294.201	365.123	9.76508	3.28763	3.481	3.064	3.94	3.495	0.0934725	6.70695	Ssa06018735,2-aminoethanethiol dioxygenase-like,PCO_ADO
Ssa10003234	9.423	5.026	3.524	5.991	13.401	21.733	140.324	58.486	9.76231	3.28722	0	0	0	0	0	#DIV/0!	Ssa10003234,transcription factor,Myb_DNA-binding
Ssa12007840	9.645	6.128	12.994	9.589	48.231	153.478	79.059	93.5893	9.76007	3.28689	106.575	128.813	129.326	121.571	12.6782	-0.377387	Ssa12007840,histone methyltransferase activity (H3-K4 specific),-
Ssa08022107	1.457	0.892	0.882	1.077	14.619	4.943	11.922	10.4947	9.74435	3.28457	4.955	3.986	4.499	4.48	4.1597	1.22809	Ssa08022107,Glutathione S-transferase,"GST_C,GST_C_2,GST_N,GST_N_3"
Ssa10003791	1.989	2.579	2.479	2.349	7.154	10.493	50.673	22.7733	9.69491	3.27723	0.244	0.173	0.256	0.224333	0.0955016	6.66556	Ssa10003791,Belongs to the protein kinase superfamily,"Pkinase,Pkinase_Tyr"
Ssa02009850	3.944	1.05	2.171	2.38833	38.908	10.991	19.49	23.1297	9.68444	3.27567	2.169	2.054	0.352	1.525	0.638521	3.92286	Ssa02009850,beta-D-xylosidase,"Fn3-like,Glyco_hydro_3,Glyco_hydro_3_C"
Ssa05016438	0	0.076	0	0.0253333	0.046	0.636	0.054	0.245333	9.68421	3.27563	1.477	3.061	2.016	2.18467	86.2368	-3.1546	Ssa05016438,-,-
Ssa10003414	1.651	2.414	3.248	2.43767	25.472	36.723	8.614	23.603	9.68262	3.2754	0	0.076	0	0.0253333	0.0103925	9.86372	Ssa10003414,Aux IAA proteins are short-lived transcriptional factors that function as repressors of early auxin response genes at low auxin concentrations,AUX_IAA
Ssa10004550	23.039	21.816	22.2	22.3517	140.708	165.437	342.59	216.245	9.67467	3.27421	22.875	15.351	19.357	19.1943	0.858743	3.49391	Ssa10004550,SNF1-related protein kinase regulatory subunit,CBS
Ssa08023168	0.097	1.335	0.539	0.657	11.834	4.051	3.168	6.351	9.66667	3.27302	6.254	4.356	4.079	4.89633	7.45256	0.375282	Ssa08023168,EIN3-binding F-box protein,"F-box,F-box-like,LRR_6"
Ssa02011669	0	0.431	0.655	0.362	4.501	2.434	3.548	3.49433	9.65285	3.27096	16.918	20.218	16.656	17.9307	49.5322	-2.35934	Ssa02011669,NAC domain-containing protein,NAM
Ssa10003813	0.111	0.962	0.391	0.488	6.088	3.366	4.659	4.70433	9.64003	3.26904	0	0	0	0	0	#DIV/0!	Ssa10003813,transcription factor,Myb_DNA-binding
Ssa08023797	1.983	1.6	2.036	1.873	12.558	21.869	19.653	18.0267	9.62449	3.26671	4.374	3.69	4.082	4.04867	2.16159	2.15461	Ssa08023797,-,-
Ssa07021801	6.217	10.816	11.317	9.45	136.294	109.983	26.342	90.873	9.61619	3.26547	0.032	0	0	0.0106667	0.00112875	13.0565	Ssa07021801,Transferase family,Transferase
Ssa01000932	0.41	0.309	0.902	0.540333	5.119	7.6	2.847	5.18867	9.60271	3.26344	0.151	0	1.582	0.577667	1.06909	3.16705	Ssa01000932,-,-
Ssa09025007	0.734	0.704	0.881	0.773	1.42	1.208	19.616	7.41467	9.59207	3.26184	0	0.156	0.309	0.155	0.200517	5.58004	Ssa09025007,Heavy-metal-associated domain,HMA
Ssa02010122	3.284	3.134	5.336	3.918	56.496	32.875	23.339	37.57	9.58908	3.26139	0.061	0.049	0.048	0.0526667	0.0134422	9.47848	Ssa02010122,Probably involved in the RNA silencing pathway and required for the generation of small interfering RNAs (siRNAs),RdRP
Ssa03012965	14.192	10.554	10.782	11.8427	126.027	126.672	87.969	113.556	9.58872	3.26134	0.362	0.385	0.625	0.457333	0.0386174	7.95594	Ssa03012965,Alpha-trehalose glucohydrolase,Trehalase
Ssa05016396	0.637	0.462	1.014	0.704333	4.513	8.116	7.622	6.75033	9.584	3.26063	1.73	1.475	1.343	1.516	2.15239	2.15469	Ssa05016396,G-type lectin S-receptor-like Serine,"B_lectin,DUF3403,PAN_2,Pkinase,Pkinase_Tyr,S_locus_glycop"
Ssa02011506	1.457	0.892	0.882	1.077	14.576	4.614	11.728	10.306	9.56917	3.25839	4.955	4.128	4.499	4.52733	4.20365	1.18675	Ssa02011506,Glutathione S-transferase,"GST_C,GST_C_2,GST_N,GST_N_3"
Ssa13009139	0.525	1.944	1.668	1.379	21.775	4.342	13.449	13.1887	9.56394	3.2576	53.475	50.247	57.601	53.7743	38.9952	-2.02762	Ssa13009139,Serine threonine-protein kinase STN8,Pkinase
Ssa01002499	0.205	0	0.361	0.188667	0.758	3.337	1.314	1.803	9.55654	3.25649	0.151	0	0	0.0503333	0.266784	5.16274	Ssa01002499,Nonspecific lipid-transfer protein,LTP_2
Ssa10003391	2.688	2.277	5.469	3.478	36.206	62.753	0.718	33.2257	9.5531	3.25597	0	0.263	0	0.0876667	0.0252061	8.56605	Ssa10003391,Auxin responsive protein,Auxin_inducible
Ssa02012184	12.473	9.493	9.55	10.5053	80.041	189.702	31.226	100.323	9.54972	3.25546	0	0	0	0	0	#DIV/0!	Ssa02012184,Belongs to the short-chain dehydrogenases reductases (SDR) family,adh_short
Ssa04014378	0.692	0.493	0.096	0.427	5.32	2.338	4.57	4.076	9.54567	3.25485	0	0	0	0	0	#DIV/0!	Ssa04014378,Encoded by,NB-ARC
Ssa02010045	4.707	3.601	2.404	3.57067	54.24	25.952	22.06	34.084	9.54556	3.25483	333.755	388.293	184.296	302.115	84.6102	-3.14793	Ssa02010045,Alpha/beta hydrolase family,"Abhydrolase_1,Abhydrolase_6"
Ssa02010595	0.22	0.166	0.388	0.258	2.446	3.987	0.942	2.45833	9.52842	3.25224	0	0	0	0	0	#DIV/0!	Ssa02010595,-,-
Ssa08021951	0	0.431	0.655	0.362	4.448	2.382	3.517	3.449	9.52762	3.25212	16.918	20.128	16.524	17.8567	49.3278	-2.37221	Ssa08021951,NAC domain-containing protein,NAM
Ssa06019155	8.108	6.614	7.58	7.434	34.4	63.251	114.484	70.7117	9.51193	3.24974	1.407	0.88	0.608	0.965	0.129809	6.19528	Ssa06019155,NAC transcription factor,NAM
Ssa01000460	0.24	0.407	0.423	0.356667	8.256	1.413	0.45	3.373	9.45701	3.24138	1061.83	1336.53	2646.24	1681.53	4714.57	-8.96153	Ssa01000460,Reversible hydration of carbon dioxide,Pro_CA
Ssa05016159	12.17	9.838	11.496	11.168	60.606	55.612	200.367	105.528	9.44917	3.24019	8.569	10.309	13.939	10.939	0.979495	3.27008	Ssa05016159,DNA polymerase alpha chain like domain,PHP
Ssa11005123	0.033	0	0.087	0.04	0.122	0.536	0.475	0.377667	9.44167	3.23904	0.726	0.797	1.219	0.914	22.85	-1.27508	Ssa11005123,receptor-like protein kinase,"GUB_WAK_bind,Pkinase,Pkinase_Tyr"
Ssa07020015	0.368	0.154	1.944	0.822	2.1	18.537	2.623	7.75333	9.43228	3.23761	0	0	0	0	0	#DIV/0!	Ssa07020015,Belongs to the cytochrome P450 family,p450
Ssa07021686	0.898	1.6	1.369	1.289	6.642	12.367	17.407	12.1387	9.41712	3.23529	1.518	1.566	1.247	1.44367	1.11999	3.0718	Ssa07021686,Two-component response regulator-like,"CCT,Response_reg"
Ssa08023817	0.34	0.154	0.359	0.284333	2.488	1.601	3.929	2.67267	9.39977	3.23262	0.851	0.266	0.631	0.582667	2.04924	2.19754	Ssa08023817,Domain in histone families 1 and 5,"AT_hook,Linker_histone"
Ssa08023119	1.658	2.043	3.845	2.51533	11.988	29.169	29.707	23.6213	9.39094	3.23127	5.539	4.71	6.862	5.70367	2.26756	2.05013	Ssa08023119,-,-
Ssa09025906	1.446	2.643	2.816	2.30167	28.102	21.946	14.727	21.5917	9.38088	3.22972	0	0	0	0	0	#DIV/0!	Ssa09025906,S-type anion channel,SLAC1
Ssa06018014	2.028	1.877	1.859	1.92133	20.58	17.658	15.803	18.0137	9.37561	3.22891	8.077	7.132	7.99	7.733	4.02481	1.21999	Ssa06018014,ZINC FINGER protein,"zf-C2H2,zf-C2H2_jaz"
Ssa03013534	3.016	4.31	2.924	3.41667	36.179	15.643	44.092	31.9713	9.35746	3.22612	1.131	1.539	1.71	1.46	0.427317	4.45274	Ssa03013534,Encoded by,"3Beta_HSD,Epimerase"
Ssa03014113	0.127	0.191	0	0.106	0.351	0.114	2.501	0.988667	9.32704	3.22142	12.277	18.089	25.385	18.5837	175.318	-4.23241	Ssa03014113,Chaperone protein,DnaJ
Ssa01002836	15.473	40.625	45.259	33.7857	326.255	391.335	223.265	313.618	9.28259	3.21453	43.89	49.432	72.082	55.1347	1.6319	2.50798	Ssa01002836,"transcription, DNA-templated",Myb_DNA-binding
Ssa06018167	9.153	2.917	7.806	6.62533	40.383	112.747	31.167	61.4323	9.27234	3.21293	3.839	3.027	4.897	3.921	0.591819	3.9697	Ssa06018167,B3 domain-containing protein,B3
Ssa02010068	35.066	24.358	34.761	31.395	90.221	300.617	481.23	290.689	9.2591	3.21087	52.461	35.306	25.345	37.704	1.20096	2.94669	Ssa02010068,-,-
Ssa05016661	0.051	0.038	0	0.0296667	0.493	0.138	0.19	0.273667	9.22472	3.2055	0.112	0.04	0	0.0506667	1.70787	2.43331	Ssa05016661,LRR receptor-like serine threonine-protein kinase,"LRR_1,LRR_4,LRR_8"
Ssa01000658	19.445	17.609	15.798	17.6173	115.286	249.937	121.984	162.402	9.21833	3.2045	27.88	22.651	40.894	30.475	1.72983	2.41387	Ssa01000658,Nudix hydrolase,NUDIX
Ssa07020885	0.699	0.818	0.683	0.733333	11.005	5.231	4.044	6.76	9.21818	3.20448	0	0	0.06	0.02	0.0272727	8.40088	Ssa07020885,Cytokinin dehydrogenase,"Cytokin-bind,FAD_binding_4"
Ssa02009792	7.277	10.607	5.404	7.76267	55.206	32.486	126.395	71.3623	9.19302	3.20054	284.402	265.706	284.961	278.356	35.8583	-1.9637	Ssa02009792,"transcription, DNA-templated",Myb_DNA-binding
Ssa05016331	0.06	0.182	0.212	0.151333	0.906	0.9	2.367	1.391	9.19163	3.20032	0.022	0	0	0.00733333	0.0484581	7.56744	Ssa05016331,wall-associated receptor kinase-like,"LysM,Pkinase,Pkinase_Tyr"
Ssa13008780	3.077	4.356	2.978	3.47033	36.236	15.476	43.928	31.88	9.18644	3.19951	1.041	1.395	1.71	1.382	0.398233	4.52782	Ssa13008780,Encoded by,"3Beta_HSD,Epimerase"
Ssa13008324	3.143	3.696	2.955	3.26467	41.918	28.507	19.46	29.9617	9.17756	3.19811	27.918	18.234	23.592	23.248	7.12109	0.366011	Ssa13008324,B3 DNA binding domain,B3
Ssa10004286	121.014	33.985	282.571	145.857	626.617	2383.42	1000.09	1336.71	9.16455	3.19606	36.865	38.5	24.567	33.3107	0.228379	5.32656	Ssa10004286,-,-
Ssa12006831	1.876	3.695	5.714	3.76167	23.097	49.085	31.151	34.4443	9.15667	3.19482	1294.25	1292	2651.77	1746.01	464.158	-5.66365	Ssa12006831,photosystem I subunit O,-
Ssa11005039	0.637	0.305	0.357	0.433	4.793	2.828	4.268	3.963	9.15242	3.19415	0	0	0	0	0	#DIV/0!	Ssa11005039,transcription factor,HLH
Ssa10004542	1.708	1.837	1.395	1.64667	8.407	27.144	9.58	15.0437	9.13583	3.19154	0	1.048	0.094	0.380667	0.231174	5.30448	Ssa10004542,Protein SHOOT GRAVITROPISM 5-like,-
Ssa06018132	4.076	0	5.533	3.203	29.945	42.446	15.117	29.1693	9.10688	3.18696	0	0	0	0	0	#DIV/0!	Ssa06018132,Protein TERMINAL FLOWER 1-like,PBP
Ssa09024781	0.306	0.307	0.09	0.234333	2.358	2.951	1.089	2.13267	9.101	3.18602	41.452	44.216	68.146	51.2713	218.797	-4.58742	Ssa09024781,Myb-like DNA-binding domain,Myb_DNA-binding
Ssa06019456	0.26	0.078	0.092	0.143333	0.12	3.482	0.306	1.30267	9.08837	3.18402	0	0	0	0	0	#DIV/0!	Ssa06019456,WAT1-related protein,EamA
Ssa09024943	4.504	3.875	4.124	4.16767	36.024	25.229	52.045	37.766	9.06167	3.17978	20.202	21.543	11.632	17.7923	4.26914	1.08583	Ssa09024943,protein serine/threonine kinase activity,"NAF,Pkinase"
Ssa02012067	0.262	0.952	1.151	0.788333	6.252	10.491	4.682	7.14167	9.0592	3.17938	7.758	7.087	10.062	8.30233	10.5315	-0.217256	Ssa02012067,ZINC FINGER protein,"zf-C2H2,zf-C2H2_jaz"
Ssa01002800	2.023	2.2	1.621	1.948	12.223	14.269	26.388	17.6267	9.0486	3.17769	745.009	705.569	395.491	615.356	315.891	-5.12559	Ssa01002800,Domain of unknown function (DUF4336),DUF4336
Ssa12007947	2.623	2.552	1.346	2.17367	35.186	16.807	6.92	19.6377	9.03435	3.17542	0.844	1.025	1.814	1.22767	0.564791	3.99963	Ssa12007947,Zinc transporter,Zip
Ssa06017972	15.511	11.053	9.869	12.1443	114.644	119.616	93.881	109.38	9.0067	3.171	2.443	2.056	2.886	2.46167	0.202701	5.47357	Ssa06017972,-,-
Ssa07020294	0.086	0.207	0.349	0.214	1.498	2.321	1.96	1.92633	9.00156	3.17017	6.508	4.656	4.572	5.24533	24.5109	-1.44518	Ssa07020294,Ribonuclease H protein,"C2,DUF4283,RVT_1,RVT_3,zf-RVT"
Ssa01001085	0	1.979	0.462	0.813667	11.083	8.936	1.909	7.30933	8.9832	3.16723	0	0	0	0	0	#DIV/0!	Ssa01001085,"Regulates membrane-cell wall junctions and localized cell wall deposition. Required for establishment of the Casparian strip membrane domain (CSD) and the subsequent formation of Casparian strips, a cell wall modification of the root endodermis that determines an apoplastic barrier between the intraorganismal apoplasm and the extraorganismal apoplasm and prevents lateral diffusion (B…
Ssa11005053	2.475	1.864	2.762	2.367	15.775	27.547	20.463	21.2617	8.98254	3.16712	0.2	0.142	0.326	0.222667	0.0940713	6.57723	Ssa11005053,Inactive receptor kinase,"LRR_8,Pkinase,Pkinase_Tyr"
Ssa07021162	11.532	3.087	15.575	10.0647	37.77	91.383	141.567	90.24	8.96602	3.16447	105.434	113.043	83.186	100.554	9.99083	-0.156136	Ssa07021162,Non-specific serine threonine protein kinase,"NAF,Pkinase"
Ssa09024092	13.143	7.368	8.863	9.79133	67.825	88.707	106.738	87.7567	8.96269	3.16393	13.364	16.375	10.723	13.4873	1.37748	2.7019	Ssa09024092,Zinc transporter,Zip
Ssa02010090	27.91	10.343	20.143	19.4653	34.285	270.96	217.583	174.276	8.95315	3.16239	28.691	32.878	33.821	31.7967	1.6335	2.45443	Ssa02010090,Dynein light chain type 1,Dynein_light
Ssa03013288	3.329	8.146	5.418	5.631	62.724	41.268	46.756	50.2493	8.9237	3.15764	55.128	34.962	23.945	38.0117	6.75043	0.402662	Ssa03013288,"alpha,alpha-trehalose-phosphate synthase UDP-forming","Glyco_transf_20,Trehalose_PPase"
Ssa06017875	0	0	0.088	0.0293333	0.046	0.363	0.376	0.261667	8.92045	3.15712	0	0	0	0	0	#DIV/0!	Ssa06017875,C2H2-type zinc finger,zf-C2H2_6
Ssa05016957	24.699	13.915	18.995	19.203	139.175	174.386	200.128	171.23	8.91682	3.15653	63.145	77.233	49.983	63.4537	3.30436	1.43216	Ssa05016957,Belongs to the alternative oxidase family,AOX
Ssa06017968	0.589	1.051	0.573	0.737667	8.031	5.833	5.864	6.576	8.9146	3.15617	0.752	0.581	0.526	0.619667	0.840036	3.40765	Ssa06017968,-,-
Ssa01002632	4.327	2.744	2.805	3.292	24.119	31.307	32.442	29.2893	8.89712	3.15334	20.005	18.386	27.299	21.8967	6.65148	0.419664	Ssa01002632,Synaptotagmin-3-like,"C2,SMP_LBD"
Ssa01000537	19.046	15.942	19.308	18.0987	140.887	204.61	135.262	160.253	8.85441	3.1464	13.859	15.862	14.847	14.856	0.820834	3.43123	Ssa01000537,Ras-related protein,Ras
Ssa03013987	38.576	19.746	18.269	25.5303	225.176	165.136	287.496	225.936	8.84971	3.14563	26.91	37.411	31.081	31.8007	1.2456	2.82879	Ssa03013987,GDT1-like protein,UPF0016
Ssa01001198	0.878	0.315	0.736	0.643	7.564	5.637	3.866	5.689	8.84759	3.14528	34.438	36.242	31.343	34.0077	52.8891	-2.57961	Ssa01001198,Belongs to the UDP-glycosyltransferase family,UDPGT
Ssa11006053	3.98	2.247	1.926	2.71767	30.369	28.346	13.235	23.9833	8.82497	3.14159	0.073	0	0.154	0.0756667	0.0278425	8.30816	Ssa11006053,Abscisic acid receptor,Polyketide_cyc2
Ssa04014670	0.193	0	0	0.0643333	0.447	1.049	0.207	0.567667	8.82383	3.14141	0	0.151	0	0.0503333	0.782383	3.49546	Ssa04014670,EPIDERMAL PATTERNING FACTOR-like protein,Stomagen
Ssa09025802	0	0	0.155	0.0516667	0.082	1.278	0	0.453333	8.77419	3.13327	0.649	0.69	1.091	0.81	15.6774	-0.83735	Ssa09025802,Lipolytic acyl hydrolase (LAH),Patatin
Ssa05016310	16.997	6.869	11.875	11.9137	91.206	167.175	54.678	104.353	8.7591	3.13078	0	0	0	0	0	#DIV/0!	Ssa05016310,Belongs to the CRISP family,CAP
Ssa07020297	3.443	3.195	2.395	3.011	23.438	31.427	23.951	26.272	8.72534	3.12521	0	0	0	0	0	#DIV/0!	Ssa07020297,-,-
Ssa06017984	4.099	4.213	6.482	4.93133	47.215	54.109	27.491	42.9383	8.70725	3.12222	17.225	19.346	17.099	17.89	3.62782	1.26311	Ssa06017984,phosphatase 2C,PP2C
Ssa10003156	2.396	1.704	3.513	2.53767	19.82	21.908	24.529	22.0857	8.70314	3.12154	27.688	46.272	30.504	34.8213	13.7218	-0.656861	Ssa10003156,Protein of unknown function (DUF1677),DUF1677
Ssa01001646	5.929	4.677	11.773	7.45967	54.471	106.73	33.028	64.743	8.67907	3.11754	5.105	5.073	3.965	4.71433	0.631976	3.7796	Ssa01001646,Converts alpha-aldose to the beta-anomer,Aldose_epim
Ssa07020998	4.943	3.813	2.44	3.732	21.355	11.45	64.342	32.3823	8.67694	3.11719	16.396	20.252	25.214	20.6207	5.52537	0.651116	Ssa07020998,-,-
Ssa12006984	8.886	4.981	7.361	7.076	57.623	92.217	34.198	61.346	8.66959	3.11596	4.291	3.446	4.305	4.014	0.56727	3.93386	Ssa12006984,Formiminotransferase domain,FTCD_N
Ssa02009853	0.387	0.146	0.17	0.234333	2.146	2.798	1.136	2.02667	8.64865	3.11247	6.396	5.136	3.581	5.03767	21.4979	-1.31365	Ssa02009853,-,-
Ssa13009203	3.884	4.823	3.999	4.23533	45.751	42.27	21.854	36.625	8.64749	3.11228	1.154	1.324	1.02	1.166	0.275303	4.97319	Ssa13009203,Solute carrier family 40 member,FPN1
Ssa01000624	0	0.104	0.122	0.0753333	0	1.879	0.074	0.651	8.64159	3.1113	0	0	0	0	0	#DIV/0!	Ssa01000624,-,-
Ssa08022282	0.971	0.808	1.124	0.967667	7.186	5.871	12.014	8.357	8.63624	3.1104	1.39	0.998	2.445	1.611	1.66483	2.37503	Ssa08022282,transcription factor,HLH
Ssa04015302	19.363	20.008	16.854	18.7417	84.072	130.413	270.81	161.765	8.6313	3.10958	2.423	12.553	5.484	6.82	0.363895	4.56798	Ssa04015302,Aux IAA proteins are short-lived transcriptional factors that function as repressors of early auxin response genes at low auxin concentrations,AUX_IAA
Ssa12006954	0.384	0	0.169	0.184333	2.666	0.463	1.642	1.59033	8.62749	3.10894	0.565	0.1	2.669	1.11133	6.02893	0.517038	Ssa12006954,Belongs to the cyclin family,"Cyclin_C,Cyclin_N"
Ssa06018453	0.207	0.599	0.943	0.583	6.554	3.845	4.671	5.02333	8.61635	3.10708	7.114	7.129	8.775	7.67267	13.1607	-0.611083	Ssa06018453,Belongs to the Ca(2 ) cation antiporter (CaCA) (TC 2.A.19) family,Na_Ca_ex
Ssa09025054	32.342	25.061	28.124	28.509	205.406	388.433	142.538	245.459	8.60988	3.10599	4.7	7.199	4.934	5.611	0.196815	5.45108	Ssa09025054,Belongs to the yippee family,Yippee-Mis18
Ssa01002116	0.523	0.303	0.354	0.393333	4.488	3.496	2.173	3.38567	8.60763	3.10562	0.296	0.283	0.559	0.379333	0.964407	3.1579	Ssa01002116,Belongs to the multi antimicrobial extrusion (MATE) (TC 2.A.66.1) family,MatE
Ssa08023461	5.274	7.431	4.288	5.66433	62.177	46.217	37.671	48.6883	8.5956	3.1036	158.127	175.335	110.625	148.029	26.1335	-1.60423	Ssa08023461,Cytochrome p450,p450
Ssa06019110	1.048	1.031	0.885	0.988	9.509	9.075	6.823	8.469	8.57186	3.09961	0.393	0.284	0.446	0.374333	0.37888	4.4998	Ssa06019110,Protein of unknown function (DUF2921),DUF2921
Ssa07020373	0.466	0.281	1.639	0.795333	3.662	14.83	1.941	6.811	8.5637	3.09824	0	0	0	0	0	#DIV/0!	Ssa07020373,RING-like zinc finger,zf-RING_2
Ssa10004869	0.282	0	0	0.094	0.87	1.19	0.352	0.804	8.55319	3.09646	0.069	0	0	0.023	0.244681	5.12749	Ssa10004869,-,-
Ssa06017527	3.187	5.176	11.985	6.78267	100.425	63.581	9.948	57.9847	8.54895	3.09575	2.159	2.197	0.338	1.56467	0.230686	5.21174	Ssa06017527,transcription factor,HLH
Ssa01001603	0	0.144	0	0.048	0	0	1.228	0.409333	8.52778	3.09217	0	0	0	0	0	#DIV/0!	Ssa01001603,Monothiol,Glutaredoxin
Ssa06017783	3.639	4.423	3.595	3.88567	36.439	29.972	32.881	33.0973	8.5178	3.09048	106.687	100.27	132.152	113.036	29.0906	-1.772	Ssa06017783,KIP1-like protein,KIP1
Ssa02011822	0	0.282	0.33	0.204	1.156	3.504	0.534	1.73133	8.48693	3.08524	0	0.098	0	0.0326667	0.160131	5.72792	Ssa02011822,Belongs to the Casparian strip membrane proteins (CASP) family,DUF588
Ssa02011328	1.022	0.654	1.124	0.933333	5.886	5.917	11.905	7.90267	8.46714	3.08188	1.39	0.998	2.564	1.65067	1.76857	2.25929	Ssa02011328,transcription factor,HLH
Ssa01000065	4.377	2.009	4.038	3.47467	25.277	54.453	8.497	29.409	8.46383	3.08131	0.157	0.25	0.165	0.190667	0.0548734	7.26906	Ssa01000065,GRF1-interacting factor,SSXT
Ssa05016518	0	0	0.116	0.0386667	0.459	0.239	0.283	0.327	8.4569	3.08013	3.354	3.668	3.367	3.463	89.5603	-3.40466	Ssa05016518,-,-
Ssa07020434	8.64	5.144	5.304	6.36267	83.638	69.424	7.943	53.6683	8.43488	3.07637	0	0	0	0	0	#DIV/0!	Ssa07020434,lipid-transfer protein DIR1,LTP_2
Ssa12007349	7.816	10.136	7.87	8.60733	100.975	68.101	48.668	72.5813	8.4325	3.07596	74.695	58.829	69.701	67.7417	7.87023	0.0995551	Ssa12007349,Mediates both low-affinity uptake and efflux of sugar across the membrane,MtN3_slv
Ssa09025267	6.495	9.018	11.094	8.869	57.927	104.358	61.436	74.5737	8.40835	3.07182	127.571	117.859	99.913	115.114	12.9794	-0.626329	Ssa09025267,ZINC FINGER protein,"zf-C2H2,zf-C2H2_jaz"
Ssa01000948	5.164	4.971	3.747	4.62733	54.756	23.978	37.938	38.8907	8.40455	3.07117	6.809	6.821	7.806	7.14533	1.54416	2.44435	Ssa01000948,Transcription factor,HLH
Ssa13008473	0.486	0.675	0.691	0.617333	7.381	4.767	3.415	5.18767	8.40335	3.07096	1.374	0.876	1.01	1.08667	1.76026	2.25518	Ssa13008473,Belongs to the cytochrome P450 family,p450
Ssa09024042	14.084	22.664	37.124	24.624	200.922	251.494	165.103	205.84	8.35931	3.06338	26.326	38.239	44.253	36.2727	1.47306	2.50457	Ssa09024042,Primary amine,"Cu_amine_oxid,Cu_amine_oxidN2,Cu_amine_oxidN3"
Ssa01001778	0.815	2.292	1.913	1.67333	2.087	31.813	7.958	13.9527	8.33825	3.05974	10.751	12.743	19.677	14.3903	8.5998	-0.0445591	Ssa01001778,-,-
Ssa11005982	0	0.335	0	0.111667	1.511	0.806	0.476	0.931	8.33731	3.05958	0	0	0	0	0	#DIV/0!	Ssa11005982,Glutamate--glyoxylate aminotransferase,Aminotran_1_2
Ssa09024385	13.088	7.995	8.039	9.70733	78.572	75.378	88.846	80.932	8.3372	3.05956	24.96	25.901	28.204	26.355	2.71496	1.61863	Ssa09024385,Zinc transporter 6,Zip
Ssa06019619	0.181	0.137	0	0.106	0.168	1.805	0.678	0.883667	8.33648	3.05944	0.267	0.142	0.28	0.229667	2.16667	1.94396	Ssa06019619,-,-
Ssa13008367	3.267	2.572	12.806	6.215	43.892	57.358	54.031	51.7603	8.32829	3.05802	0	0	0	0	0	#DIV/0!	Ssa13008367,Auxin responsive protein,Auxin_inducible
Ssa02009669	0.236	0.089	0.104	0.143	0.218	0.639	2.706	1.18767	8.30536	3.05404	0	0	0	0	0	#DIV/0!	Ssa02009669,CEN-like protein,PBP
Ssa02009768	0.569	0.429	0.347	0.448333	5.509	2.416	3.229	3.718	8.29294	3.05188	3.67	3.764	3.819	3.751	8.36654	-0.0127485	Ssa02009768,Belongs to the UDP-glycosyltransferase family,UDPGT
Ssa01000476	1.758	3.82	2.784	2.78733	29.831	17.583	21.844	23.086	8.28247	3.05006	22.932	19.192	42.139	28.0877	10.0769	-0.282919	Ssa01000476,Phosphoenolpyruvate phosphate translocator 2,TPT
Ssa04014536	0.275	0.363	0.666	0.434667	3.563	1.369	5.805	3.579	8.2339	3.04158	7.129	8.866	5.148	7.04767	16.214	-0.977589	Ssa04014536,L-type lectin-domain containing receptor kinase,"Lectin_legB,Pkinase,Pkinase_Tyr"
Ssa04014707	1.618	0.965	5.635	2.73933	26.005	35.001	6.591	22.5323	8.22548	3.0401	2.726	1.317	1.041	1.69467	0.618642	3.73292	Ssa04014707,-,C1_2
Ssa07020552	16.836	22.139	10.304	16.4263	140.265	110.893	153.808	134.989	8.21782	3.03876	1.614	2.669	1.13	1.80433	0.109844	6.22523	Ssa07020552,-,-
Ssa13008086	0.038	0	0.033	0.0236667	0.245	0.034	0.304	0.194333	8.21127	3.0376	0	0	0.029	0.00966667	0.408451	4.32937	Ssa13008086,Belongs to the glycosyl hydrolase 5 (cellulase A) family,Cellulase
Ssa01001111	1.534	0.21	3.68	1.808	12.381	19.042	13.035	14.8193	8.19653	3.03501	533.177	734.434	536.482	601.364	332.613	-5.34269	Ssa01001111,-,-
Ssa08023441	0	0.072	0.084	0.052	0.044	0.776	0.458	0.426	8.19231	3.03427	0	0.149	0	0.0496667	0.955128	3.1005	Ssa08023441,Protein LATERAL ORGAN,LOB
Ssa09024674	1.254	1.369	1.048	1.22367	12.508	8.078	9.426	10.004	8.17543	3.03129	43.288	37.144	31.585	37.339	30.514	-1.90011	Ssa09024674,Cysteine-rich receptor-like protein kinase,"Pkinase,Pkinase_Tyr,Stress-antifung"
Ssa01000507	0.38	0.476	0.445	0.433667	4.096	0.572	5.948	3.53867	8.15988	3.02855	0	0.297	0	0.099	0.228286	5.15963	Ssa01000507,LOB domain-containing protein,LOB
Ssa09025305	9.232	1.807	7.473	6.17067	35.354	84.503	31.072	50.3097	8.15304	3.02734	6.651	11.108	7.41	8.38967	1.3596	2.58415	Ssa09025305,-,-
Ssa12007024	0.24	0.451	1.16	0.617	1.996	10.082	3.009	5.029	8.15073	3.02693	0.352	0.375	0.092	0.273	0.442464	4.2033	Ssa12007024,GPI-anchored protein,-
Ssa12006968	67.476	13.872	104.75	62.0327	248.689	1100.78	166.081	505.184	8.14384	3.02571	1.185	3.239	4.265	2.89633	0.0466905	7.44644	Ssa12006968,Wound induced protein,DUF3774
Ssa01002009	2	0.376	3.958	2.11133	0.832	50.638	0.107	17.1923	8.14288	3.02554	0	0	0	0	0	#DIV/0!	Ssa01002009,Soybean trypsin inhibitor (Kunitz) family of protease inhibitors,Kunitz_legume
Ssa06018100	47.719	13.665	102.157	54.5137	254.553	815.927	260.076	443.519	8.13592	3.0243	0.033	0.071	0	0.0346667	0.000635926	13.6432	Ssa06018100,Myb/SANT-like DNA-binding domain,Myb_DNA-bind_4
Ssa12007032	5.75	1.375	7.439	4.85467	19.458	49.616	49.036	39.37	8.10972	3.01965	0.199	0.211	0.47	0.293333	0.060423	7.06841	Ssa12007032,PDDEXK-like family of unknown function,PDDEXK_6
Ssa07020078	0	0.156	0.091	0.0823333	0.479	0.749	0.774	0.667333	8.10526	3.01886	1.598	2.022	4.553	2.72433	33.0891	-2.02942	Ssa07020078,xanthine catabolic process,"Ald_Xan_dh_C,Ald_Xan_dh_C2,CO_deh_flav_C,FAD_binding_5,Fer2,Fer2_2"
Ssa08022538	0.048	0.144	0.105	0.099	0.753	0.693	0.959	0.801667	8.09764	3.0175	0.018	0	0.24	0.086	0.868687	3.22059	Ssa08022538,Domain of unknown function (DUF4378),"DUF3741,DUF4378"
Ssa04015318	0.289	0.435	0.254	0.326	2.804	1.567	3.547	2.63933	8.09611	3.01723	15.491	9.473	18.936	14.6333	44.8875	-2.47101	Ssa04015318,-,-
Ssa06019313	0.339	0.287	0.484	0.37	3.094	2.911	2.963	2.98933	8.07928	3.01423	0	0	0	0	0	#DIV/0!	Ssa06019313,Belongs to the UDP-glycosyltransferase family,UDPGT
Ssa10004427	29.898	29.11	23.459	27.489	218.624	163.434	283.349	221.802	8.06877	3.01235	408.625	401.009	332.212	380.615	13.8461	-0.779059	Ssa10004427,CBS domain-containing protein,"CBS,PB1"
Ssa11005763	0	0	1.591	0.530333	0.093	12.722	0	4.27167	8.05468	3.00983	0	0	0	0	0	#DIV/0!	Ssa11005763,lipid-transfer protein,LTP_2
Ssa03013061	0.87	2.107	1.264	1.41367	13.117	14.673	6.242	11.344	8.02452	3.00442	0.056	0.148	0	0.068	0.0481019	7.38218	Ssa03013061,-,-
Ssa04015373	0.8	1.807	1.583	1.39667	17.524	9.585	6.409	11.1727	7.99952	2.99991	0.073	0.234	0.309	0.205333	0.147017	5.76586	Ssa04015373,Belongs to the Casparian strip membrane proteins (CASP) family,DUF588
Ssa12007561	0	0	0.034	0.0113333	0.25	0	0.021	0.0903333	7.97059	2.99469	0	0	0	0	0	#DIV/0!	Ssa12007561,Pectinesterase,"PMEI,Pectinesterase"
Ssa11006413	1.103	0.346	0.162	0.537	3.953	1.413	7.463	4.27633	7.96338	2.99338	0.27	0.215	0	0.161667	0.301055	4.72528	Ssa11006413,GEM-like protein,GRAM
Ssa01001974	6.559	7.589	4.837	6.32833	38.05	33.193	79.786	50.343	7.95518	2.99189	197.108	160.887	164.942	174.312	27.5447	-1.79181	Ssa01001974,"transcription, DNA-templated",Myb_DNA-binding
Ssa01002308	0.064	0.192	0	0.0853333	0.353	1.036	0.646	0.678333	7.94922	2.99081	0	0	0	0	0	#DIV/0!	Ssa01002308,UDP-galactose transporter 2-like,TPT
Ssa11006062	25.597	29.958	21.378	25.6443	196.441	64.839	350.27	203.85	7.94912	2.9908	763.902	759.582	543.427	688.97	26.8664	-1.75693	Ssa11006062,PLATZ transcription factor family protein,PLATZ
Ssa02010664	6.102	8.062	11.187	8.45033	69.836	64.192	67.482	67.17	7.9488	2.99074	29.111	28.48	46.327	34.6393	4.09917	0.955406	Ssa02010664,Belongs to the iron ascorbate-dependent oxidoreductase family,"2OG-FeII_Oxy,DIOX_N"
Ssa02010130	0	0.061	0.214	0.0916667	0.318	1.777	0.087	0.727333	7.93455	2.98815	0	0	0	0	0	#DIV/0!	Ssa02010130,Belongs to the protein kinase superfamily. Ser Thr protein kinase family,"LRRNT_2,LRR_1,LRR_6,LRR_8,Pkinase"
Ssa09024778	3.399	1.89	2.3	2.52967	10.204	15.18	34.83	20.0713	7.93438	2.98812	198.173	230.314	108.499	178.995	70.7585	-3.15671	Ssa09024778,U-box domain-containing protein,Arm
Ssa01001696	803.339	289.414	454.79	515.848	1921.27	4404.9	5929.83	4085.33	7.91964	2.98544	1741.48	1797.65	1179.9	1573.01	3.04936	1.37693	Ssa01001696,-,-
Ssa02009564	0.092	0	0	0.0306667	0.299	0.084	0.345	0.242667	7.91304	2.98423	12.284	20.486	31.135	21.3017	694.62	-6.45585	Ssa02009564,membrane-associated kinase regulator,-
Ssa09024075	88.609	30.749	117.074	78.8107	481.869	742.615	640.768	621.751	7.88917	2.97987	26.329	28.347	42.098	32.258	0.40931	4.26861	Ssa09024075,Coproporphyrinogen-III oxidase,Coprogen_oxidas
Ssa11005657	0.174	0.296	0.192	0.220667	1.049	1.183	2.982	1.738	7.87613	2.97749	95.273	110.526	103.281	103.027	466.888	-5.88945	Ssa11005657,UDP-glycosyltransferase 89A2-like,UDPGT
Ssa07021031	6.6	5.711	6.011	6.10733	23.189	34.928	86.17	48.0957	7.87507	2.97729	57.798	69.391	61.257	62.8153	10.2852	-0.38521	Ssa07021031,U-box domain-containing protein,Arm
Ssa02009646	2.455	0.804	0.892	1.38367	13.404	8.545	10.721	10.89	7.87039	2.97644	48.339	46.205	32.746	42.43	30.6649	-1.96208	Ssa02009646,transcription factor,TCP
Ssa07020157	0.217	3.919	3.244	2.46	12.287	3.041	42.753	19.3603	7.87005	2.97637	5.421	7.286	15.064	9.257	3.76301	1.06449	Ssa07020157,-,-
Ssa07020083	0.088	0	0	0.0293333	0.245	0.4	0.047	0.230667	7.86364	2.9752	0	0	0	0	0	#DIV/0!	Ssa07020083,Belongs to the small heat shock protein (HSP20) family,HSP20
Ssa01002011	2.5	0.075	4.134	2.23633	0.925	51.814	0	17.5797	7.86093	2.9747	0	0	0	0	0	#DIV/0!	Ssa01002011,Soybean trypsin inhibitor (Kunitz) family of protease inhibitors,Kunitz_legume
Ssa05016660	0	0.008	0.018	0.00866667	0.163	0.009	0.032	0.068	7.84615	2.97199	0.791	0.534	0.73	0.685	79.0385	-3.3325	Ssa05016660,Disease resistance protein,"LRR_8,NB-ARC"
Ssa02011851	32.397	13.441	25.4	23.746	107.632	55.811	394.872	186.105	7.83732	2.97036	539.809	489.525	422.463	483.932	20.3795	-1.37869	Ssa02011851,Wound-induced protein,DUF3774
Ssa09025643	5.049	7.286	7.139	6.49133	50.508	44.794	56.929	50.7437	7.81714	2.96664	0.972	0.657	0.603	0.744	0.114614	6.09178	Ssa09025643,RING-H2 finger protein,zf-RING_2
Ssa10004146	5.499	2.606	1.556	3.22033	21.857	10.538	43.098	25.1643	7.8142	2.9661	0.057	0.06	0.356	0.157667	0.0489597	7.31836	Ssa10004146,Cytochrome p450,p450
Ssa09024019	5.814	5.306	4.237	5.119	62.577	31.179	26.227	39.9943	7.81292	2.96586	1.727	1.744	1.042	1.50433	0.293873	4.7326	Ssa09024019,Inositol phosphate kinase with a broad substrate specificity,IPK
Ssa03013173	0.127	0.191	0.408	0.242	1.014	0.305	4.348	1.889	7.80579	2.96454	0	0	0	0	0	#DIV/0!	Ssa03013173,Belongs to the UDP-glycosyltransferase family,UDPGT
Ssa12007702	1.708	1.381	1.67	1.58633	14.452	12.072	10.611	12.3783	7.80311	2.96405	3.581	4.547	1.66	3.26267	2.05673	1.92369	Ssa12007702,Protein LATERAL ROOT PRIMORDIUM,DUF702
Ssa11005996	1.819	2.77	4.695	3.09467	30.362	18.391	23.626	24.1263	7.7961	2.96275	123.713	138.561	102.887	121.72	39.3323	-2.33489	Ssa11005996,Belongs to the multi antimicrobial extrusion (MATE) (TC 2.A.66.1) family,MatE
Ssa01000044	2.154	2.628	3.593	2.79167	13.222	20.552	31.419	21.731	7.78424	2.96056	0.71	0.696	0.458	0.621333	0.222567	5.12824	Ssa01000044,Belongs to the protein kinase superfamily,Pkinase
Ssa12007079	0.442	1.166	0.714	0.774	8.251	7.402	2.402	6.01833	7.77562	2.95896	14.416	12.845	17.637	14.966	19.3359	-1.31425	Ssa12007079,transcription factor,TCP
Ssa06017967	0.37	0.04	0.046	0.152	1.124	0.812	1.608	1.18133	7.77193	2.95827	0	0.041	0	0.0136667	0.0899123	6.43361	Ssa06017967,membrane-associated kinase regulator,-
Ssa11005912	8.064	7.716	1.921	5.90033	10.593	7.04	119.931	45.8547	7.77154	2.9582	3.046	5.25	1.469	3.255	0.551664	3.81634	Ssa11005912,WAT1-related protein,EamA
Ssa06018281	0.687	0.282	2.309	1.09267	0.029	25.432	0	8.487	7.76724	2.9574	0	0	0	0	0	#DIV/0!	Ssa06018281,Polygalacturonase,"LRRNT_2,LRR_1,LRR_4,LRR_6,LRR_8"
Ssa05016380	0	0.025	0	0.00833333	0.076	0.03	0.088	0.0646667	7.76	2.95606	0.024	0	0.026	0.0166667	2	1.95606	Ssa05016380,G-type lectin S-receptor-like serine threonine-protein kinase,"B_lectin,DUF3403,PAN_2,Pkinase_Tyr,S_locus_glycop"
Ssa01001084	0.209	1.102	0.184	0.498333	4.643	5.769	1.173	3.86167	7.74916	2.95404	0	0	0	0	0	#DIV/0!	Ssa01001084,"Regulates membrane-cell wall junctions and localized cell wall deposition. Required for establishment of the Casparian strip membrane domain (CSD) and the subsequent formation of Casparian strips, a cell wall modification of the root endodermis that determines an apoplastic barrier between the intraorganismal apoplasm and the extraorganismal apoplasm and prevents lateral diffusion (B…
Ssa02009994	8.586	8.62	7.92	8.37533	75.703	75.276	43.254	64.7443	7.73036	2.95054	1259.83	1270.39	1031.48	1187.23	141.754	-4.19671	Ssa02009994,glutamine synthetase,"Gln-synt_C,Gln-synt_N"
Ssa06018822	1.277	0.962	0.674	0.971	10.129	7.392	4.98	7.50033	7.72434	2.94941	35.672	28.634	23.306	29.204	30.0762	-1.96114	Ssa06018822,TCP family transcription factor,TCP
Ssa08023566	0.7	0.416	1.168	0.761333	4.33	8.302	5.002	5.878	7.72067	2.94873	0.271	0.173	0.057	0.167	0.219352	5.13741	Ssa08023566,U-box domain-containing protein,Arm
Ssa02011209	1.585	0.341	0.299	0.741667	5.08	8.501	3.569	5.71667	7.70787	2.94633	0	0	0	0	0	#DIV/0!	Ssa02011209,two-component response regulator,Response_reg
Ssa04014663	3.247	4.126	3.303	3.55867	32.378	33.312	16.586	27.4253	7.70663	2.9461	0.671	0.396	0.783	0.616667	0.173286	5.47487	Ssa04014663,Belongs to the iron ascorbate-dependent oxidoreductase family,"2OG-FeII_Oxy,DIOX_N"
Ssa05016912	3.967	3.983	6.98	4.97667	43.267	41.858	29.845	38.3233	7.7006	2.94497	0.243	0.258	0.51	0.337	0.067716	6.82933	Ssa05016912,Ribosome associated membrane protein RAMP4,RAMP4
Ssa06018555	1.04	0.708	1.394	1.04733	7.968	10.298	5.871	8.04567	7.68205	2.94149	0.036	0.193	0.497	0.242	0.231063	5.05513	Ssa06018555,Belongs to the mitochondrial carrier (TC 2.A.29) family,Mito_carr
Ssa08022034	20.239	20.211	32.82	24.4233	252.401	181.417	127.769	187.196	7.66462	2.93822	37.131	44.422	53.208	44.9203	1.83924	2.05911	Ssa08022034,Pathogen-related,-
Ssa02011361	58.335	25.469	39.469	41.091	74.241	369.19	500.593	314.675	7.65799	2.93697	390.048	477.712	562.106	476.622	11.5992	-0.598985	Ssa02011361,EF hand family protein,"EF-hand_1,EF-hand_5,EF-hand_7"
Ssa11005513	22.107	19.162	11.833	17.7007	70.375	47.126	288.525	135.342	7.64615	2.93473	21.046	18.31	18.707	19.3543	1.09342	2.80588	Ssa11005513,Belongs to the multi antimicrobial extrusion (MATE) (TC 2.A.66.1) family,MatE
Ssa02011584	20.41	20.276	32.745	24.477	253.036	181.34	126.807	187.061	7.64232	2.93401	36.816	43.886	53.87	44.8573	1.83263	2.06009	Ssa02011584,Pathogen-related,-
Ssa08022250	57.905	25.577	39.469	40.9837	74.042	367.505	497.76	313.102	7.63969	2.93351	383.937	471.441	557.018	470.799	11.4875	-0.588476	Ssa08022250,EF hand family protein,"EF-hand_1,EF-hand_5,EF-hand_7"
Ssa05016385	0.033	0	0	0.011	0.06	0.088	0.104	0.084	7.63636	2.93289	0.12	0.102	0.302	0.174667	15.8788	-1.05614	Ssa05016385,G-type lectin S-receptor-like serine threonine-protein kinase,"B_lectin,DUF3403,PAN_2,Pkinase_Tyr,S_locus_glycop"
Ssa06018595	0.073	0.055	0	0.0426667	0.498	0.399	0.078	0.325	7.61719	2.92926	0	0	0	0	0	#DIV/0!	Ssa06018595,Cation H( ) antiporter,Na_H_Exchanger
Ssa08022399	1.585	0.341	0.299	0.741667	4.975	8.501	3.448	5.64133	7.60629	2.92719	0	0	0	0	0	#DIV/0!	Ssa08022399,two-component response regulator,Response_reg
Ssa06018582	0.054	0.081	0	0.045	0.599	0.341	0.086	0.342	7.6	2.926	3.291	3.961	1.457	2.903	64.5111	-3.08548	Ssa06018582,-,-
Ssa01001725	1.632	1.518	1.774	1.64133	12.165	2.952	22.283	12.4667	7.59545	2.92514	0.67	0.938	0.407	0.671667	0.40922	4.21419	Ssa01001725,E3 ubiquitin-protein ligase,zf-RING_2
Ssa03012759	0.037	0	0	0.0123333	0.12	0.101	0.059	0.0933333	7.56757	2.91983	13.051	9.585	8.409	10.3483	839.054	-6.79279	Ssa03012759,S-type anion channel,SLAC1
Ssa02010446	0.049	0.073	0.043	0.055	0.135	1.059	0.052	0.415333	7.55152	2.91677	0	0	0	0	0	#DIV/0!	Ssa02010446,f-box protein,Chloroplast_duf
Ssa07020846	27.206	18.629	21.486	22.4403	177.735	189.832	139.241	168.936	7.52823	2.91231	1.711	2.069	2.008	1.92933	0.0859761	6.45223	Ssa07020846,UDP-Glycosyltransferase,UDPGT
Ssa06017492	0.045	0	0.157	0.0673333	0.476	0.971	0.072	0.506333	7.5198	2.91069	0	0	0	0	0	#DIV/0!	Ssa06017492,Benzyl alcohol,Transferase
Ssa08023740	0.33	0.546	0.696	0.524	2.591	4.053	5.175	3.93967	7.51845	2.91043	0.048	0	0	0.016	0.0305344	7.94386	Ssa08023740,transcription factor,Myb_DNA-binding
Ssa04014797	14.781	7.42	8.496	10.2323	74.282	77.358	78.959	76.8663	7.5121	2.90922	0	0	0	0	0	#DIV/0!	Ssa04014797,-,-
Ssa09025419	0.168	0	0.099	0.089	0.596	0.152	1.256	0.668	7.50562	2.90797	1.111	1.138	0.994	1.081	12.1461	-0.694447	Ssa09025419,Protein of unknown function (DUF642),DUF642
Ssa07021331	0.806	1.609	1.233	1.216	8.215	11.946	7.168	9.10967	7.4915	2.90526	0.155	0.082	0.027	0.088	0.0723684	6.69375	Ssa07021331,"Carotenoid 9,10(9',10')-cleavage dioxygenase 1-like",RPE65
Ssa06019299	0.52	0.599	0.996	0.705	1.429	4.786	9.609	5.27467	7.4818	2.90338	0.607	0.239	1.062	0.636	0.902128	3.05198	Ssa06019299,ABC transporter G family member,"ABC2_membrane,ABC_tran"
Ssa03013126	16.355	9.197	20.522	15.358	165.833	103.11	75.095	114.679	7.46707	2.90054	13.596	16.552	16.669	15.6057	1.01613	2.87746	Ssa03013126,Belongs to the mitochondrial carrier (TC 2.A.29) family,Mito_carr
Ssa11004917	0.727	0.292	0.256	0.425	1.725	2.191	5.591	3.169	7.45647	2.89849	2.315	2.385	2.804	2.50133	5.88549	0.34133	Ssa11004917,LRR receptor-like serine threonine-protein kinase,"LRRNT_2,LRR_1,LRR_8"
Ssa07021179	13.803	16.378	17.812	15.9977	100.051	131.199	125.981	119.077	7.4434	2.89596	13.037	14.379	18.528	15.3147	0.957306	2.95891	Ssa07021179,BEST Arabidopsis thaliana protein match is,-
Ssa02011168	0	0.063	0.222	0.095	0.039	0.152	1.93	0.707	7.44211	2.89571	0	0.131	0	0.0436667	0.459649	4.01711	Ssa02011168,Zinc finger BED domain-containing protein,"DUF4413,Dimer_Tnp_hAT,zf-BED"
Ssa01002010	0	0.077	0.18	0.0856667	0	1.854	0.055	0.636333	7.42802	2.89298	0	0	0	0	0	#DIV/0!	Ssa01002010,Soybean trypsin inhibitor (Kunitz) family of protease inhibitors,Kunitz_legume
Ssa07021375	0.349	0.667	0.26	0.425333	2.605	2.475	4.385	3.155	7.41771	2.89097	1.637	1.53	0.497	1.22133	2.87147	1.36918	Ssa07021375,von Willebrand factor type A domain,"VWA_2,zf-RING_11,zf-RING_2"
Ssa11005357	9.957	6.094	10.297	8.78267	73.65	35.705	85.882	65.079	7.40994	2.88946	15.88	15.877	13.076	14.9443	1.70157	2.12259	Ssa11005357,bifunctional UDP-glucose 4-epimerase and UDP-xylose 4-epimerase,GDP_Man_Dehyd
Ssa02010166	10.432	8.802	10.561	9.93167	54.837	36.174	129.736	73.5823	7.40886	2.88925	28.939	25.228	34.829	29.6653	2.98694	1.31058	Ssa02010166,zinc finger CCCH domain-containing protein,zf-CCCH
Ssa11005409	0	0	0.035	0.0116667	0	0.109	0.15	0.0863333	7.4	2.88753	0	0	0.124	0.0413333	3.54286	1.06261	Ssa11005409,"Protein of unknown function, DUF604",DUF604
Ssa11005170	0.087	0.109	0.128	0.108	1.183	0.526	0.683	0.797333	7.38272	2.88415	0	0	0	0	0	#DIV/0!	Ssa11005170,phosphatase 2c,PP2C
Ssa08023319	13.843	11.419	9.452	11.5713	70.767	47.614	137.68	85.3537	7.3763	2.8829	208.99	198.391	150.93	186.104	16.0832	-1.12458	Ssa08023319,Cyclic dof factor,zf-Dof
Ssa02012008	0.682	0.656	0.733	0.690333	2.435	5.894	6.942	5.09033	7.37373	2.8824	275.768	247.6	115.688	213.019	308.574	-5.38708	Ssa02012008,Pheophorbide A oxygenase,"PaO,Rieske"
Ssa02010365	0.66	0.963	0.943	0.855333	4.272	5.707	8.922	6.30033	7.36594	2.88087	374.697	288.82	400.927	354.815	414.826	-5.81549	Ssa02010365,Rhomboid family,Rhomboid
Ssa03013498	0.923	1.668	0.65	1.08033	9.906	10.02	3.946	7.95733	7.36563	2.88081	0.136	0	0.142	0.0926667	0.085776	6.42409	Ssa03013498,Catalytic subunit of the peripheral V1 complex of vacuolar ATPase (V-ATPase). V-ATPase is responsible for acidifying a variety of intracellular compartments in eukaryotic cells,V-ATPase_G
Ssa01001893	7.102	4.874	4.271	5.41567	36.627	50.49	32.511	39.876	7.36308	2.88031	12.886	13.274	13.042	13.0673	2.41288	1.60956	Ssa01001893,Ras-related protein RABA6a-like,Ras
Ssa06018163	0	0.627	0.366	0.331	1.684	3.388	2.223	2.43167	7.34642	2.87704	0	0	0	0	0	#DIV/0!	Ssa06018163,"Regulates membrane-cell wall junctions and localized cell wall deposition. Required for establishment of the Casparian strip membrane domain (CSD) and the subsequent formation of Casparian strips, a cell wall modification of the root endodermis that determines an apoplastic barrier between the intraorganismal apoplasm and the extraorganismal apoplasm and prevents lateral diffusion (B…
Ssa03013829	0	0.063	0	0.021	0.078	0.227	0.157	0.154	7.33333	2.87447	0.123	0	0.065	0.0626667	2.98413	1.29716	Ssa03013829,Protein of unknown function (DUF563),DUF563
Ssa10004524	0.317	0	0	0.105667	0.195	0.096	2.032	0.774333	7.32808	2.87343	0	0.165	0.082	0.0823333	0.77918	3.23341	Ssa10004524,Domain of unknown function (DUF4408),DUF4408
Ssa01000715	9.897	9.741	12.753	10.797	94.969	77.673	64.653	79.0983	7.32595	2.87302	11.973	13.213	12.569	12.585	1.1656	2.65194	Ssa01000715,RNA recognition,RRM_1
Ssa04014762	53.816	35.487	30.375	39.8927	104.572	266.957	505.002	292.177	7.32408	2.87265	664.546	883.558	788.305	778.803	19.5225	-1.41442	Ssa04014762,"Catalyzes the formation of formate and 2-keto-4- methylthiobutyrate (KMTB) from 1,2-dihydroxy-3-keto-5- methylthiopentene (DHK-MTPene)",ARD
Ssa02011429	0.057	0	0.1	0.0523333	0.84	0.308	0	0.382667	7.3121	2.87029	3.214	3.726	3.33	3.42333	65.414	-3.16124	Ssa02011429,Zinc transporter,Zip
Ssa13008281	1.401	0.722	0.649	0.924	6.274	9.935	4.057	6.75533	7.31097	2.87006	32.952	33.121	43.24	36.4377	39.4347	-2.43133	Ssa13008281,Protein of unknown function (DUF4079),DUF4079
Ssa12006600	1.968	1.174	1.079	1.407	4.976	2.311	23.427	10.238	7.27647	2.86324	0.075	0.22	0.099	0.131333	0.0933428	6.28456	Ssa12006600,Fusaric acid resistance protein-like,FUSC_2
Ssa02009878	0.238	0.269	0.315	0.274	2.645	1.293	2.037	1.99167	7.26886	2.86173	21.023	12.755	9.472	14.4167	52.6156	-2.85569	Ssa02009878,RING-H2 finger protein,zf-RING_2
Ssa12007918	10.904	12.747	9.534	11.0617	67.271	64.804	108.825	80.3	7.2593	2.85983	6.828	4.575	5.272	5.55833	0.502486	3.85268	Ssa12007918,Catalyzes the ATP-dependent amination of UTP to CTP with either L-glutamine or ammonia as the source of nitrogen,"CTP_synth_N,GATase"
Ssa13008816	0.923	1.668	0.65	1.08033	9.821	9.853	3.847	7.84033	7.25733	2.85944	0.136	0	0.142	0.0926667	0.085776	6.40272	Ssa13008816,Catalytic subunit of the peripheral V1 complex of vacuolar ATPase (V-ATPase). V-ATPase is responsible for acidifying a variety of intracellular compartments in eukaryotic cells,V-ATPase_G
Ssa04014949	0.217	0.598	0.444	0.419667	4.472	3.786	0.848	3.03533	7.23272	2.85454	0	0	0	0	0	#DIV/0!	Ssa04014949,"Dirigent proteins impart stereoselectivity on the phenoxy radical-coupling reaction, yielding optically active lignans from two molecules of coniferyl alcohol in the biosynthesis of lignans, flavonolignans, and alkaloids and thus plays a central role in plant secondary metabolism",Dirigent
Ssa09024251	61.2	9.129	12.445	27.5913	126.163	299.991	172.409	199.521	7.23129	2.85425	114.592	158.103	216.758	163.151	5.91312	0.290333	Ssa09024251,-,-
Ssa03012720	6.72	3.036	4.237	4.66433	46.41	44.368	10.111	33.6297	7.20996	2.84999	0.165	0.175	1.988	0.776	0.166369	5.43753	Ssa03012720,Adenine phosphoribosyltransferase,Pribosyltran
Ssa10003563	99.971	55.495	108.709	88.0583	389.758	512.613	1001.5	634.624	7.20686	2.84937	93.106	110.394	177.02	126.84	1.44041	2.32289	Ssa10003563,ethylene-responsive transcription factor,AP2
Ssa06017890	30.549	8.802	24.957	21.436	80.949	239.434	142.712	154.365	7.2012	2.84824	0.516	0.548	0.722	0.595333	0.0277726	8.01843	Ssa06017890,Myb-related protein,Myb_DNA-binding
Ssa11005029	8.243	3.019	6.566	5.94267	98.498	25.892	3.987	42.7923	7.20086	2.84817	0	0	0	0	0	#DIV/0!	Ssa11005029,-,-
Ssa05016574	0	0.262	0.306	0.189333	0.723	1.414	1.949	1.362	7.19366	2.84673	0.128	0.407	0	0.178333	0.941901	2.93308	Ssa05016574,GDSL esterase lipase,"Lipase_GDSL,Lipase_GDSL_2"
Ssa09024897	2.469	1.824	1.762	2.01833	12.624	17.653	13.263	14.5133	7.19075	2.84614	1.096	0.946	1.725	1.25567	0.62213	3.53085	Ssa09024897,Taxadien-5-alpha-ol,Transferase
Ssa06017497	0.606	1.065	1.829	1.16667	11.295	5.483	8.374	8.384	7.18629	2.84525	182.689	161.96	106.953	150.534	129.029	-4.16631	Ssa06017497,Acyltransferase-like protein At1g54570,"DAGAT,Hydrolase_4"
Ssa12007832	1.171	0.772	0.773	0.905333	2.37	5.826	11.262	6.486	7.16421	2.84081	2.368	2.974	1.921	2.421	2.67415	1.42173	Ssa12007832,protein phosphatase binding,-
Ssa13009052	28.634	35.688	30.032	31.4513	182.016	246.982	246.595	225.198	7.16019	2.84	37.334	36.148	46.578	40.02	1.27244	2.4924	Ssa13009052,ER lumen protein retaining,ER_lumen_recept
Ssa10003964	11.875	7.816	19.658	13.1163	86.449	82.423	112.216	93.696	7.14346	2.83662	176.856	149.137	110.582	145.525	11.0949	-0.635208	Ssa10003964,-,-
Ssa11006336	2.7	2.842	3.034	2.85867	11.555	19.332	30.344	20.4103	7.13981	2.83589	0.765	1.068	0.753	0.862	0.301539	4.56547	Ssa11006336,Adagio protein,"F-box,Kelch_2,Kelch_4,PAS_9"
Ssa02010067	4.895	3.762	8.792	5.81633	44.612	43.807	36.061	41.4933	7.13393	2.8347	0.75	0.398	0.393	0.513667	0.0883145	6.3359	Ssa02010067,Ras-related protein,Ras
Ssa13009053	4.726	7.697	3.932	5.45167	19.647	19.885	77.082	38.8713	7.13017	2.83394	47.655	57.672	37.025	47.4507	8.70388	-0.287722	Ssa13009053,TPL-binding domain in jasmonate signalling,"EAR,Jas"
Ssa11005437	64.287	18.016	101.76	61.3543	251.63	802.248	255.252	436.377	7.1124	2.83034	1.659	2.469	2.16	2.096	0.0341622	7.70179	Ssa11005437,-,-
Ssa02010903	14.039	8.253	7.662	9.98467	45.242	54.322	113.461	71.0083	7.11174	2.8302	19.923	18.418	12.167	16.836	1.68619	2.07644	Ssa02010903,transcription,Myb_DNA-binding
Ssa11005105	10.655	6.132	6.628	7.805	53.17	35.295	77.731	55.3987	7.09784	2.82738	0.898	0.795	0.995	0.896	0.114798	5.95021	Ssa11005105,Catalyzes the synthesis of activated sulfate,APS_kinase
Ssa10003366	5.239	9.32	8.966	7.84167	42.016	72.483	52.469	55.656	7.09747	2.82731	41.645	40.753	39.986	40.7947	5.2023	0.448157	Ssa10003366,Adipocyte plasma membrane-associated,Str_synth
Ssa11005439	0.634	0.208	0.461	0.434333	3.853	4.641	0.752	3.082	7.09593	2.82699	0	0	0	0	0	#DIV/0!	Ssa11005439,oligopeptide transporter,OPT
Ssa02010657	4.652	2.604	1.493	2.91633	8.839	5.8	47.39	20.6763	7.08984	2.82575	5.916	7.565	4.173	5.88467	2.01783	1.81295	Ssa02010657,Family of unknown function (DUF716),DUF716
Ssa13008628	0.32	0.792	0.845	0.652333	6.538	3.972	3.348	4.61933	7.08125	2.824	0.303	0.286	0.282	0.290333	0.445069	3.9919	Ssa13008628,Rhomboid-like protease,Rhomboid
Ssa06017767	40.78	32.385	18.78	30.6483	130.937	122.365	397.342	216.881	7.07645	2.82303	21	20.577	16.882	19.4863	0.635804	3.47637	Ssa06017767,Nuclear transcription factor Y subunit,CBFD_NFYB_HMF
Ssa10003513	0.117	0.973	0.62	0.57	6.953	4.196	0.941	4.03	7.07018	2.82175	0	0	0	0	0	#DIV/0!	Ssa10003513,Belongs to the glycosyl hydrolase 17 family,Glyco_hydro_17
Ssa08022634	1.351	2.83	3.358	2.513	25.666	16.094	11.482	17.7473	7.06221	2.82012	0.043	0.459	0.272	0.258	0.102666	6.10409	Ssa08022634,GDSL esterase lipase,Lipase_GDSL
Ssa08023322	26.585	22.627	25.742	24.9847	180.122	224.149	120.651	174.974	7.00326	2.80803	12.628	13.963	38.32	21.637	0.866011	3.01557	Ssa08023322,Malate dehydrogenase,"Ldh_1_C,Ldh_1_N"
Ssa03012940	0	0.144	0	0.048	0.354	0.346	0.307	0.335667	6.99306	2.80592	0.563	0	1.183	0.582	12.125	-0.79399	Ssa03012940,Uncharacterised conserved protein UCP031279 (InterPro IPR016972),-
Ssa08023858	2.998	3.116	2.601	2.905	23.027	32.16	5.73	20.3057	6.9899	2.80527	0.807	2.508	0.587	1.30067	0.447734	3.96456	Ssa08023858,Polygalacturonase,Glyco_hydro_28
Ssa08022182	0.057	0	0.1	0.0523333	0.84	0.257	0	0.365667	6.98726	2.80473	3.13	3.726	3.286	3.38067	64.5987	-3.20871	Ssa08022182,Zinc transporter,Zip
Ssa04015503	0	0.03	0.071	0.0336667	0.261	0.401	0.043	0.235	6.9802	2.80327	15.956	15.509	21.577	17.6807	525.168	-6.23337	Ssa04015503,ankyrin repeat-containing protein,"Ank,Ank_2,Ank_3,Ank_4,PGG"
Ssa13008519	8.592	6.445	3.347	6.128	51.383	29.778	47.125	42.762	6.97813	2.80284	21.624	22.419	25.535	23.1927	3.7847	0.882661	Ssa13008519,"Protein CHUP1, chloroplastic-like",-
Ssa01000705	4.346	6.063	2.536	4.315	28.373	43.447	18.501	30.107	6.97729	2.80267	7.836	6.47	10.38	8.22867	1.90699	1.87137	Ssa01000705,"Tubulin is the major constituent of microtubules. It binds two moles of GTP, one at an exchangeable site on the beta chain and one at a non-exchangeable site on the alpha chain","Tubulin,Tubulin_C"
Ssa10003124	1.585	1.364	1.893	1.614	5.499	13.724	14.488	11.237	6.96221	2.79954	39.623	41.316	29.755	36.898	22.8612	-1.71529	Ssa10003124,membrane-associated kinase regulator,-
Ssa01000681	9.086	13.417	10.472	10.9917	61.597	42.298	125.594	76.4963	6.95948	2.79898	121.362	84.909	22.013	76.0947	6.92294	0.00759526	Ssa01000681,Thioredoxin-like 1-1,Thioredoxin
Ssa09025237	1.726	1.503	4.366	2.53167	14.767	23.806	14.147	17.5733	6.94141	2.79523	0.912	0.295	0.624	0.610333	0.24108	4.84765	Ssa09025237,zinc finger CCCH domain-containing protein,zf-CCCH
Ssa01001112	9.793	3.258	4.608	5.88633	22.223	61.379	38.93	40.844	6.93878	2.79468	37.332	49.641	68.012	51.6617	8.77654	-0.33897	Ssa01001112,-,-
Ssa10004090	6.054	7.068	6.402	6.508	51.53	36.924	47.001	45.1517	6.93787	2.79449	11.106	10.155	10.073	10.4447	1.6049	2.11201	Ssa10004090,Myb/SANT-like DNA-binding domain,Myb_DNA-bind_4
Ssa03012306	2.729	1.813	1.554	2.032	12.969	19.021	10.292	14.094	6.93602	2.79411	5.193	4.599	3.593	4.46167	2.1957	1.65943	Ssa03012306,Transcriptional activator that specifically binds 5'- GATA-3' or 5'-GAT-3' motifs within gene promoters,GATA
Ssa02011489	1.321	0.884	0.947	1.05067	6.018	6.902	8.937	7.28567	6.93433	2.79376	0.18	0.229	0.075	0.161333	0.153553	5.49694	Ssa02011489,-,-
Ssa07021416	0.539	0.135	0.158	0.277333	1.414	1.951	2.401	1.922	6.93029	2.79292	1.189	1.124	0.832	1.04833	3.78005	0.874511	Ssa07021416,-,-
Ssa01001268	1.888	1.015	0.712	1.205	17.711	7.317	0	8.34267	6.92337	2.79148	0	0.211	1.457	0.556	0.461411	3.90735	Ssa01001268,-,-
Ssa04015519	21.73	32.207	21.711	25.216	211.485	86.735	224.986	174.402	6.91632	2.79001	57.898	59.34	62.368	59.8687	2.37423	1.54254	Ssa04015519,Nuclear transcription factor Y subunit,CBFB_NFYA
Ssa07021176	32.265	32.193	29.666	31.3747	145.282	307.958	197.436	216.892	6.91297	2.7893	59.651	67.221	83.642	70.1713	2.23656	1.62802	Ssa07021176,Aspartate aminotransferase,Aminotran_1_2
Ssa08023458	63.22	93.683	87.537	81.48	599.13	646.194	435.803	560.376	6.87746	2.78188	12.52	12.555	14.332	13.1357	0.161213	5.41483	Ssa08023458,High-affinity nitrate transporter,NAR2
Ssa10003103	126.889	119.364	180.099	142.117	835.443	988.861	1106.58	976.961	6.87433	2.78122	2942.13	3005.39	1719.51	2555.68	17.9829	-1.38733	Ssa10003103,Stem-specific protein,DUF3700
Ssa01002008	1.5	0.151	2.991	1.54733	0.509	31.378	0	10.629	6.86924	2.78015	0	0	0	0	0	#DIV/0!	Ssa01002008,Soybean trypsin inhibitor (Kunitz) family of protease inhibitors,Kunitz_legume
Ssa03014110	7.907	3.212	3.387	4.83533	16.456	14.773	68.362	33.197	6.8655	2.77937	0	0.325	0	0.108333	0.0224045	8.25943	Ssa03014110,Domain of unknown function (DUF4228),DUF4228
Ssa13008157	7.351	10.226	4.823	7.46667	34.026	8.621	111.021	51.2227	6.86018	2.77825	146.454	136.77	114.564	132.596	17.7584	-1.37218	Ssa13008157,reveille,Myb_DNA-binding
Ssa05015820	10.307	6.835	8.656	8.59933	42.655	58.578	75.674	58.969	6.85739	2.77766	9.255	10.615	9.806	9.892	1.15032	2.57562	Ssa05015820,Belongs to the 3-hydroxyisobutyrate dehydrogenase family,"NAD_binding_11,NAD_binding_2"
Ssa02010384	0	0.191	0	0.0636667	0.351	0.687	0.27	0.436	6.84817	2.77572	26.041	10.28	6.639	14.32	224.921	-5.03756	Ssa02010384,-,-
Ssa09024872	0.867	0.75	0.457	0.691333	3.447	7.211	3.542	4.73333	6.84667	2.7754	1.879	2.234	7.29	3.801	5.49807	0.316477	Ssa09024872,Cytochrome p450,p450
Ssa10004549	93.8	14.525	37.55	48.625	90.886	609.114	298.458	332.819	6.84461	2.77497	12.231	12.434	10.234	11.633	0.239239	4.83844	Ssa10004549,-,-
Ssa11005769	4.905	1.979	1.002	2.62867	7.251	12.992	33.689	17.9773	6.83896	2.77378	6.31	6.843	6.489	6.54733	2.49074	1.4572	Ssa11005769,E3 ubiquitin-protein ligase,zf-RING_2
Ssa08022124	1.321	0.921	0.947	1.063	6.018	6.902	8.885	7.26833	6.83757	2.77348	0.18	0.229	0.075	0.161333	0.151772	5.49351	Ssa08022124,-,-
Ssa01000437	17.435	6.514	9.953	11.3007	78.17	86.186	66.903	77.0863	6.8214	2.77007	0.489	0.416	0.103	0.336	0.0297328	7.84187	Ssa01000437,-,-
Ssa06017711	3.027	1.016	1.38	1.80767	16.782	16.657	3.526	12.3217	6.81634	2.769	0.08	0.171	0.225	0.158667	0.0877743	6.27905	Ssa06017711,DnaJ heat shock amino-terminal domain protein,-
Ssa08023462	10.295	17.537	21.393	16.4083	142.852	88.094	104.563	111.836	6.81583	2.76889	1.986	1.674	1.114	1.59133	0.0969832	6.13501	Ssa08023462,E3 ubiquitin-protein ligase RGLG2-like,"Copine,zf-C3HC4_3"
Ssa02009732	0.259	0.146	0.512	0.305667	0.718	0.175	5.354	2.08233	6.81243	2.76817	0	0.101	0.1	0.067	0.219193	4.9579	Ssa02009732,Arabidopsis protein of unknown function,"BPS1,DUF241"
Ssa11005858	0.891	0.47	0.941	0.767333	6.223	3.869	5.522	5.20467	6.7828	2.76188	0.066	0.07	0	0.0453333	0.0590791	6.84309	Ssa11005858,Glutathione S-transferase,"GST_C,GST_C_2,GST_N,GST_N_3"
Ssa03012562	62.238	35.759	42.222	46.7397	50.631	679.55	220.717	316.966	6.78152	2.76161	18.19	22.067	16.588	18.9483	0.405402	4.06419	Ssa03012562,Phytosulfokines,PSK
Ssa07021253	0.514	0.58	0.362	0.485333	3.326	4.599	1.921	3.282	6.76236	2.75753	0.189	0.201	0.872	0.420667	0.866758	2.96383	Ssa07021253,"zinc-finger of the FCS-type, C2-C2",zf-FLZ
Ssa09025074	3.031	3.509	5.334	3.958	25.131	32.41	22.744	26.7617	6.76141	2.75732	1.231	0.778	1.187	1.06533	0.26916	4.65079	Ssa09025074,IQ-DOMAIN 1-like,"DUF4005,IQ"
Ssa08023118	2.979	4.038	3.46	3.49233	21.41	29.908	19.511	23.6097	6.76043	2.75711	31.623	26.673	25.84	28.0453	8.03054	-0.248383	Ssa08023118,methyltransferase At2g41040,Methyltransf_11
Ssa01002084	0	0.085	0	0.0283333	0.208	0.306	0.06	0.191333	6.75294	2.75552	0	0	0	0	0	#DIV/0!	Ssa01002084,Carboxylesterase 1-like,Abhydrolase_3
Ssa02011071	4.306	4.885	4.546	4.579	30.587	21.134	40.913	30.878	6.74339	2.75347	2.152	3.14	4.519	3.27033	0.714203	3.23907	Ssa02011071,mediator of RNA polymerase II transcription subunit,Med26
Ssa13009275	0.198	0.298	0	0.165333	0.962	1.164	1.217	1.11433	6.73992	2.75273	0.51	0.232	0.153	0.298333	1.80444	1.90118	Ssa13009275,"DNA-directed RNA polymerases I, II, and III subunit","RNA_pol_Rpb5_C,RNA_pol_Rpb5_N"
Ssa03012497	0.539	0.406	0.158	0.367667	0.083	7.155	0.192	2.47667	6.73617	2.75193	0	0	0	0	0	#DIV/0!	Ssa03012497,-,-
Ssa03013796	0.2	0.376	0.176	0.250667	0.555	2.261	2.243	1.68633	6.72739	2.75005	201.012	206.689	223.905	210.535	839.902	-6.96403	Ssa03013796,psbQ-like protein 1,PsbQ
Ssa08022855	0.253	0	0.445	0.232667	1.755	2.517	0.406	1.55933	6.70201	2.74459	0.186	0	0	0.062	0.266476	4.65252	Ssa08022855,receptor-like protein kinase,"GUB_WAK_bind,Pkinase,Pkinase_Tyr"
Ssa13009215	39.352	26.015	19.578	28.315	136.984	165.247	265.968	189.4	6.68902	2.7418	5.166	6.405	4.79	5.45367	0.192607	5.11806	Ssa13009215,-,-
Ssa05016639	0.653	0.123	0.144	0.306667	2.266	3.619	0.262	2.049	6.68152	2.74018	0	0	0.126	0.042	0.136957	5.60839	Ssa05016639,TMV resistance protein N-like,"NB-ARC,TIR"
Ssa07021458	1.611	1.747	2.495	1.951	14.069	21.102	3.891	13.0207	6.67384	2.73852	63.157	67.477	55.359	61.9977	31.7774	-2.25141	Ssa07021458,Monoacylglycerol lipase,"Abhydrolase_1,Abhydrolase_4"
Ssa08023648	0.282	0.243	0.425	0.316667	2.03	2.112	2.194	2.112	6.66947	2.73757	0.178	0.126	0.062	0.122	0.385263	4.11366	Ssa08023648,Aminotransferase class-V,Aminotran_5
Ssa12007377	1.206	0.202	0.236	0.548	0.681	2.908	7.371	3.65333	6.66667	2.73697	0.098	5.442	1.757	2.43233	4.43856	0.586872	Ssa12007377,-,-
Ssa03012228	0	0.053	0	0.0176667	0.033	0.32	0	0.117667	6.66038	2.7356	0	0	0	0	0	#DIV/0!	Ssa03012228,Arabidopsis protein of unknown function,DUF241
Ssa08023321	9.895	6.153	5.829	7.29233	44.78	50.218	50.686	48.5613	6.65923	2.73536	196.062	200.408	321.552	239.341	32.8209	-2.30119	Ssa08023321,Geranylgeranyl diphosphate reductase,"FAD_binding_3,GIDA,Pyr_redox_2"
Ssa11005200	3.472	4.575	3.524	3.857	31.957	23.428	21.648	25.6777	6.65742	2.73496	2.65	1.878	2.421	2.31633	0.600553	3.4706	Ssa11005200,E3 ubiquitin-protein ligase,"Prok-RING_4,zf-C3HC4_3"
Ssa09024824	2.629	1.472	1.839	1.98	10.695	15.244	13.578	13.1723	6.65269	2.73394	26.02	27.339	22.216	25.1917	12.7231	-0.935436	Ssa09024824,Glycosyltransferase,Exostosin
Ssa11005779	0	0.151	0.177	0.109333	0	2.181	0	0.727	6.64939	2.73322	0	0	0	0	0	#DIV/0!	Ssa11005779,lipid-transfer protein,LTP_2
Ssa04015683	8.784	5.144	9.159	7.69567	25.954	88.42	39.017	51.1303	6.64404	2.73206	25.829	32.662	31.006	29.8323	3.87651	0.777303	Ssa04015683,-,-
Ssa05017213	38.328	23.844	34.532	32.2347	117.112	223.838	299.73	213.56	6.62517	2.72796	25.538	29.144	31.396	28.6927	0.890118	2.89589	Ssa05017213,-,-
Ssa13009322	28.576	18.697	16.905	21.3927	127.191	82.883	213.927	141.334	6.60664	2.72392	296.771	405.106	307.592	336.49	15.7292	-1.25146	Ssa13009322,SOUL heme-binding protein,SOUL
Ssa03013691	0.32	0.827	0.845	0.664	6.517	3.972	2.64	4.37633	6.59086	2.72047	0.303	0.286	0.282	0.290333	0.437249	3.91394	Ssa03013691,Rhomboid-like protease,Rhomboid
Ssa13008142	274.332	1.781	47.162	107.758	707.152	1263.39	157.919	709.486	6.58405	2.71898	0	0	0	0	0	#DIV/0!	Ssa13008142,-,-
Ssa10003055	8.462	5.38	8.878	7.57333	47.655	64.909	36.798	49.7873	6.57403	2.71678	92.289	91.379	83.824	89.164	11.7734	-0.840683	Ssa10003055,-,-
Ssa02011652	4.338	2.368	2.958	3.22133	15.247	19.91	28.328	21.1617	6.56923	2.71572	701.917	719.582	992.277	804.592	249.77	-5.24873	Ssa02011652,Thioredoxin,Thioredoxin
Ssa03013066	0.582	0.243	1.82	0.881667	4.396	5.263	7.668	5.77567	6.55085	2.71168	26.901	26.217	26.644	26.5873	30.1558	-2.20268	Ssa03013066,Bulb-type mannose-specific lectin,"B_lectin,DUF3403,PAN_2,Pkinase,Pkinase_Tyr"
Ssa01000406	10.353	9.055	11.868	10.4253	20.409	20.24	163.621	68.09	6.53121	2.70735	65.11	84.233	35.991	61.778	5.92576	0.14035	Ssa01000406,Translocator protein homolog,TspO_MBR
Ssa06017491	1.831	0.639	2.082	1.51733	18.648	8.158	2.815	9.87367	6.50725	2.70205	175.647	154.935	178.879	169.82	111.92	-4.10428	Ssa06017491,Benzyl alcohol,Transferase
Ssa06018931	0.207	0.468	0.583	0.419333	2.853	1.685	3.628	2.722	6.49126	2.6985	31.655	31.38	34.701	32.5787	77.6916	-3.58119	Ssa06018931,Belongs to the cytochrome P450 family,p450
Ssa08022609	0.209	0.157	0.23	0.198667	1.451	0.851	1.564	1.28867	6.48658	2.69746	131.795	139.708	131.336	134.28	675.904	-6.70322	Ssa08022609,Ribosomal protein S1-like RNA-binding domain,S1
Ssa01001699	0.129	0.226	0.528	0.294333	2.816	1.163	1.741	1.90667	6.47792	2.69553	6.052	6.064	8.868	6.99467	23.7644	-1.8752	Ssa01001699,IQ-domain,"DUF4005,IQ"
Ssa01001197	0.32	0.121	0.564	0.335	1.259	2.172	3.079	2.17	6.47761	2.69546	1.059	0.751	0.865	0.891667	2.66169	1.28312	Ssa01001197,-,-
Ssa12007090	0.69	0.223	0.173	0.362	2.415	2.406	2.211	2.344	6.47514	2.69491	0	0.154	0	0.0513333	0.141805	5.51293	Ssa12007090,-,-
Ssa01001016	1.178	0	0.207	0.461667	4.249	3.196	1.51	2.985	6.4657	2.69281	1.385	0.184	0.182	0.583667	1.26426	2.35451	Ssa01001016,-,-
Ssa09025045	155.77	74.877	121.151	117.266	684.87	1032.32	551.669	756.287	6.44933	2.68915	45.312	49.938	84.708	59.986	0.511538	3.65624	Ssa09025045,Cytochrome b5,Cyt-b5
Ssa08021966	4.338	2.45	3.053	3.28033	15.297	19.812	28.271	21.1267	6.4404	2.68715	702.794	719.244	993.281	805.106	245.434	-5.25204	Ssa08021966,Thioredoxin,Thioredoxin
Ssa09025246	113.971	93.532	127.592	111.698	225.053	803.283	1127.92	718.751	6.43475	2.68588	19.632	24.99	48.169	30.9303	0.27691	4.5384	Ssa09025246,-,-
Ssa07021121	9.596	8.554	17.087	11.7457	68.199	65.748	92.349	75.432	6.42211	2.68305	82.839	62.854	51.893	65.862	5.60734	0.19573	Ssa07021121,RNA binding,-
Ssa11005276	0.723	1.53	2.515	1.58933	5.448	19.628	5.521	10.199	6.41716	2.68193	0	0	0	0	0	#DIV/0!	Ssa11005276,Protein NRT1 PTR FAMILY 6.3-like,PTR2
Ssa10003067	0.06	0.269	0.157	0.162	1.102	0.323	1.687	1.03733	6.40329	2.67881	3.11	3.398	4.506	3.67133	22.6626	-1.82342	Ssa10003067,S-adenosylmethionine decarboxylase proenzyme,SAM_decarbox
Ssa02010532	0.902	0.162	0.605	0.556333	7.909	2.526	0.252	3.56233	6.40324	2.6788	0	0	0	0	0	#DIV/0!	Ssa02010532,Serine carboxypeptidase,Peptidase_S10
Ssa07021215	49.006	19.262	32.811	33.693	81.604	194.99	369.551	215.382	6.39248	2.67637	59.134	64.655	33.299	52.3627	1.55411	2.04028	Ssa07021215,EG45-like domain containing protein,DPBB_1
Ssa07020637	11.327	3.114	6.327	6.92267	25.443	48.457	58.779	44.2263	6.38863	2.67551	30.398	28.796	19.563	26.2523	3.79223	0.75246	Ssa07020637,-,-
Ssa07020906	2.554	0.779	3.906	2.413	3.516	37.515	5.198	15.4097	6.3861	2.67494	0	0	0	0	0	#DIV/0!	Ssa07020906,-,-
Ssa10004750	11.588	17.842	11.945	13.7917	83.111	75.088	105.841	88.0133	6.38163	2.67393	222.949	243.848	266.284	244.36	17.718	-1.47322	Ssa10004750,HPP family,HPP
Ssa09025185	0.898	0.3	1.141	0.779667	5.235	2.977	6.687	4.96633	6.36982	2.67125	0	0.039	0	0.013	0.0166738	8.57753	Ssa09025185,Domain of unknown function (DUF4793),"DUF4792,DUF4793,zf-C3HC4_3"
Ssa04014758	1.501	1.671	1.953	1.70833	11.441	11.748	9.38	10.8563	6.35493	2.66788	87.185	84.197	101.248	90.8767	53.1961	-3.06537	Ssa04014758,Alpha beta-Hydrolases superfamily protein,PGAP1
Ssa06018630	3.886	0.918	2.145	2.31633	20.614	13.093	10.42	14.709	6.35012	2.66678	97.682	114.177	111.482	107.78	46.5306	-2.87332	Ssa06018630,Cystinosin homolog,PQ-loop
Ssa13009156	0.192	0.362	0.254	0.269333	1.38	2.089	1.645	1.70467	6.32921	2.66202	0.212	0.526	0.074	0.270667	1.00495	2.6549	Ssa13009156,-,-
Ssa03014181	4.463	2.614	5.235	4.104	24.882	44.25	8.786	25.9727	6.32862	2.66189	2.855	2.97	2.551	2.792	0.680312	3.21762	Ssa03014181,Vacuolar iron transporter,VIT1
Ssa02009858	1.031	0.259	0.101	0.463667	2.436	3.417	2.936	2.92967	6.31848	2.65958	0	0	0.088	0.0293333	0.0632638	6.64205	Ssa02009858,Outer envelope pore protein 16-2,Tim17
Ssa11006061	4.555	2.215	3.172	3.314	21.723	19.996	21.087	20.9353	6.31724	2.65929	9.486	12.158	14.499	12.0477	3.63539	0.797186	Ssa11006061,-,DUF740
Ssa03013672	0	0.041	0	0.0136667	0	0	0.259	0.0863333	6.31707	2.65926	0	0	0.042	0.014	1.02439	2.62449	Ssa03013672,SNF1-related protein kinase regulatory subunit gamma-like,CBS
Ssa13008647	0	0.041	0	0.0136667	0	0	0.259	0.0863333	6.31707	2.65926	0	0	0.042	0.014	1.02439	2.62449	Ssa13008647,SNF1-related protein kinase regulatory subunit gamma-like,CBS
Ssa12007397	10.127	10.248	7.555	9.31	50.392	12.163	113.429	58.6613	6.3009	2.65556	69.616	73.421	57.391	66.8093	7.17608	-0.18764	Ssa12007397,PLATZ transcription factor family protein,PLATZ
Ssa09025734	44.53	40.305	35.332	40.0557	184.815	310.1	262.11	252.342	6.29977	2.6553	0	0	0	0	0	#DIV/0!	Ssa09025734,WAT1-related protein,EamA
Ssa05017140	1.228	0.636	1.148	1.004	5.041	7.151	6.766	6.31933	6.29416	2.65401	0	0.12	0.059	0.0596667	0.059429	6.7267	Ssa05017140,transcription factor,-
Ssa06019459	2.034	2.451	1.924	2.13633	10.726	8.51	21.029	13.4217	6.28257	2.65136	0	0	0	0	0	#DIV/0!	Ssa06019459,WAT1-related protein,EamA
Ssa12007246	38.872	17.561	23.877	26.77	70.34	255.815	178.13	168.095	6.27923	2.65059	1.559	5.301	2.509	3.123	0.11666	5.7502	Ssa12007246,-,-
Ssa12006647	0	0.227	0	0.0756667	0.558	0.545	0.322	0.475	6.27753	2.6502	0.886	0.706	0.233	0.608333	8.03965	-0.356935	Ssa12006647,-,-
Ssa01000560	1.946	2.419	1.911	2.092	11.718	10.967	16.702	13.129	6.27581	2.6498	3.659	3.747	3.526	3.644	1.74187	1.84916	Ssa01000560,carboxylesterase 11,Abhydrolase_3
Ssa03012362	7.206	3.738	2.536	4.49333	9.035	30.847	44.652	28.178	6.27107	2.64871	0	0.125	0	0.0416667	0.009273	9.40146	Ssa03012362,-,-
Ssa09024934	56.508	12.404	254.812	107.908	56.076	1849.4	122.998	676.157	6.26605	2.64756	0.141	0.449	0.443	0.344333	0.00319099	10.9393	Ssa09024934,Hypoxia induced protein conserved region,HIG_1_N
Ssa13008566	6.068	3.147	4.508	4.57433	21.639	21.464	42.824	28.6423	6.26153	2.64652	7.732	9.324	8.741	8.599	1.87984	1.73591	Ssa13008566,Belongs to the mitochondrial carrier (TC 2.A.29) family,Mito_carr
Ssa04015720	9.581	9.011	9.757	9.44967	46.323	60.468	70.7	59.1637	6.26093	2.64638	10.81	10.31	7.258	9.45933	1.00102	2.6449	Ssa04015720,Indole-3-acetic acid-amido synthetase,GH3
Ssa01001594	46.55	12.163	37.287	32	132.544	265.02	202.743	200.102	6.2532	2.64459	0	0.407	0.268	0.225	0.00703125	9.7966	Ssa01001594,-,-
Ssa02010794	0.185	1.854	1.727	1.25533	8.177	6.832	8.536	7.84833	6.25199	2.64432	46.806	25.575	30.634	34.3383	27.354	-2.12936	Ssa02010794,Pentatricopeptide repeat-containing protein,"PPR,PPR_2,PPR_3"
Ssa07019957	0.82	0.617	3.366	1.601	18.073	8.156	3.796	10.0083	6.2513	2.64416	0.201	0	0	0.067	0.0418488	7.22282	Ssa07019957,-,-
Ssa07019956	0.707	0	0.622	0.443	4.14	3.409	0.755	2.768	6.24831	2.64347	0	0	0	0	0	#DIV/0!	Ssa07019956,-,-
Ssa04014421	32.94	33.306	54.833	40.3597	187.886	309.223	258.755	251.955	6.24273	2.64218	5.727	4.739	4.761	5.07567	0.125761	5.63342	Ssa04014421,Alcohol dehydrogenase-like,"ADH_N,ADH_zinc_N"
Ssa09025793	64.27	41.134	197.484	100.963	237.587	1414.89	237.847	630.109	6.24101	2.64178	0	0.712	0	0.237333	0.0023507	11.3745	Ssa09025793,Introduction of a cis double bond between carbons of the acyl chain,FA_desaturase_2
Ssa06019513	0	0.08	0	0.0266667	0.098	0.287	0.113	0.166	6.225	2.63807	0	0	0	0	0	#DIV/0!	Ssa06019513,-,-
Ssa11005687	0	0.14	0.082	0.074	0.948	0.084	0.348	0.46	6.21622	2.63604	0	0.073	0.072	0.0483333	0.653153	3.25054	Ssa11005687,magnesium transporter,CorA
Ssa09025357	0.226	0	0.399	0.208333	0.471	2.56	0.847	1.29267	6.2048	2.63338	0	0	0	0	0	#DIV/0!	Ssa09025357,Auxin responsive protein,Auxin_inducible
Ssa04015224	3.115	2.799	3.447	3.12033	12.406	29.987	15.672	19.355	6.20286	2.63293	0	0	0	0	0	#DIV/0!	Ssa04015224,VQ motif,VQ
Ssa08022076	0.218	0.066	0.038	0.107333	0.625	0.67	0.699	0.664667	6.19255	2.63053	29.428	24.463	22.076	25.3223	235.922	-5.25164	Ssa08022076,Belongs to the cytochrome P450 family,p450
Ssa01002130	0.099	0	0.116	0.0716667	1.024	0.269	0.035	0.442667	6.17674	2.62685	0	0	0	0	0	#DIV/0!	Ssa01002130,Putative S-adenosyl-L-methionine-dependent methyltransferase,Methyltransf_29
Ssa01002637	14.202	5.104	5.254	8.18667	18.062	43.205	90.351	50.5393	6.17337	2.62606	196.579	242.722	186.689	208.663	25.4882	-2.0457	Ssa01002637,-,-
Ssa10004751	35.385	63.138	46.972	48.4983	201.65	103.73	592.446	299.275	6.17084	2.62547	235.114	254.558	251.868	247.18	5.09667	0.275911	Ssa10004751,Homeobox-leucine zipper protein,"HALZ,Homeobox"
Ssa13008149	0.306	0.461	0.423	0.396667	4.265	2.016	1.051	2.444	6.16134	2.62325	3.823	4.78	8.903	5.83533	14.7109	-1.25557	Ssa13008149,UDP-rhamnose rhamnosyltransferase 1,UDPGT
Ssa01000488	2.995	2.325	2.553	2.62433	2.207	44.185	1.95	16.114	6.14023	2.61829	0.206	0	0.072	0.0926667	0.0353106	7.44205	Ssa01000488,Germin-like protein subfamily 1 member,Cupin_1
Ssa08023138	2.698	15.813	12.073	10.1947	69.844	78.239	39.514	62.5323	6.13383	2.61679	34.271	23.762	24.13	27.3877	2.68647	1.19108	Ssa08023138,Belongs to the glycosyltransferase 1 family,"Glycos_transf_1,S6PP,Sucrose_synth"
Ssa02010585	4.788	3.574	3.769	4.04367	20.628	23.02	30.693	24.7803	6.12818	2.61546	317.512	317.313	308.396	314.407	77.7529	-3.66537	Ssa02010585,Belongs to the UDP-glycosyltransferase family,UDPGT
Ssa03012928	28.817	12.399	16.029	19.0817	67.446	152.259	130.593	116.766	6.11928	2.61336	945.983	1094.59	1104.34	1048.3	54.9377	-3.16636	Ssa03012928,NAD(P)H dehydrogenase subunit S,NdhS
Ssa01000579	53.749	27.151	61.729	47.543	230.719	283.828	355.367	289.971	6.09914	2.60861	103.404	135.349	130.801	123.185	2.59102	1.23509	Ssa01000579,At3g27210-like,-
Ssa10003153	2.137	2.341	3.931	2.803	13.477	34.175	3.632	17.0947	6.0987	2.6085	0	0	0	0	0	#DIV/0!	Ssa10003153,"Transcriptional repressor, ovate",Ovate
Ssa01001955	53.937	33.398	46.058	44.4643	151.633	187.439	474.368	271.147	6.09807	2.60835	31.906	30.936	75.754	46.1987	1.03901	2.55315	Ssa01001955,oxidoreductase activity,Aldo_ket_red
Ssa06017815	1.312	0.942	1.744	1.33267	11.284	6.483	6.566	8.111	6.08629	2.60556	0.381	0.5	0.847	0.576	0.432216	3.81574	Ssa06017815,basic helix-loop-helix protein,"HLH,bHLH-MYC_N"
Ssa07020109	0.19	0.143	0.167	0.166667	0.439	1.888	0.71	1.01233	6.074	2.60265	0.977	1.779	1.318	1.358	8.148	-0.423799	Ssa07020109,-,-
Ssa13008516	0	0.052	0.06	0.0373333	0.138	0.31	0.232	0.226667	6.07143	2.60204	0.084	0.036	0	0.04	1.07143	2.5025	Ssa13008516,LRR receptor-like serine threonine-protein kinase,"LRR_8,Malectin_like,Pkinase,Pkinase_Tyr"
Ssa10003490	26.558	28.692	50.203	35.151	108.718	348.379	182.947	213.348	6.06947	2.60157	145.362	138.181	57.253	113.599	3.23173	0.909263	Ssa10003490,Transcription factor,-
Ssa11005269	0.524	2.017	6.25	2.93033	0.135	53.189	0.031	17.785	6.06928	2.60152	0.043	0.136	0	0.0596667	0.0203617	8.21952	Ssa11005269,Belongs to the LDH MDH superfamily,"Ldh_1_C,Ldh_1_N"
Ssa05016440	0	0	0.154	0.0513333	0.243	0.317	0.374	0.311333	6.06494	2.60049	0	0	0	0	0	#DIV/0!	Ssa05016440,-,-
Ssa04015638	58.182	60.309	90.993	69.828	422.314	612.072	235.934	423.44	6.06404	2.60028	9.859	8.413	14.578	10.95	0.156814	5.27315	Ssa04015638,Soluble inorganic,Pyrophosphatase
Ssa07020573	0.867	0.861	0.728	0.818667	3.482	2.246	9.159	4.96233	6.06148	2.59967	8.287	8.469	14.053	10.2697	12.5444	-1.0493	Ssa07020573,Sodium-dependent phosphate transport protein,MFS_1
Ssa01000490	0.842	0.493	1.153	0.829333	1.515	10.157	3.4	5.024	6.05788	2.59881	0	0	0	0	0	#DIV/0!	Ssa01000490,Germin-like protein subfamily 1 member,Cupin_1
Ssa01001392	1.248	1.149	0.83	1.07567	1.219	17.91	0.415	6.51467	6.0564	2.59846	0	0	0	0	0	#DIV/0!	Ssa01001392,Long-chain fatty alcohol oxidase involved in the omega- oxidation pathway of lipid degradation,"GMC_oxred_C,GMC_oxred_N"
Ssa07019851	3.287	1.395	2.523	2.40167	0.829	13.403	29.336	14.5227	6.04691	2.5962	3.163	2.661	6.917	4.247	1.76836	1.77379	Ssa07019851,Belongs to the glycosyl hydrolase 17 family,Glyco_hydro_17
Ssa13008665	9.964	9.959	10.264	10.0623	26.469	100.191	55.37	60.6767	6.03008	2.59218	2.502	1.995	3.612	2.703	0.268626	4.48851	Ssa13008665,F-box LRR-repeat protein,"LRR_5,LRR_6,LRR_8"
Ssa04015185	0.773	1.223	1.837	1.27767	10.516	4.617	7.974	7.70233	6.02844	2.59178	0.057	0	0.239	0.0986667	0.0772241	6.28659	Ssa04015185,deSI-like protein,Peptidase_C97
Ssa13008514	0	0.367	0.215	0.194	0.339	2.648	0.521	1.16933	6.02749	2.59156	0.179	0	0	0.0596667	0.30756	4.29262	Ssa13008514,Protein tyrosine kinase,"LRR_8,Malectin_like,Pkinase_Tyr"
Ssa09025229	13.509	21.191	46.242	26.9807	110.21	303.232	74.3	162.581	6.02582	2.59116	0.171	0.698	0.359	0.409333	0.0151714	8.63366	Ssa09025229,Squalene monooxygenase-like,SE
Ssa01001350	0.298	1.821	0.851	0.99	10.356	3.364	4.173	5.96433	6.02458	2.59086	74.759	45.541	51.24	57.18	57.7576	-3.26108	Ssa01001350,Transcription factor,HLH
Ssa09024886	4.27	0	1.878	2.04933	11.651	15.255	10.037	12.3143	6.00895	2.58711	0	0	0	0	0	#DIV/0!	Ssa09024886,-,-
Ssa13009373	5.08	6.595	4.932	5.53567	27.87	45.313	26.577	33.2533	6.00711	2.58667	321.423	329.71	298.357	316.497	57.1741	-3.25062	Ssa13009373,High-light-induced protein,-
Ssa04015488	67.576	22.92	18.211	36.2357	158.889	191.797	301.37	217.352	5.99829	2.58455	5.669	6.976	10.492	7.71233	0.212838	4.81672	Ssa04015488,Domain of unknown function (DUF3511),DUF3511
Ssa08023170	21.069	23.419	23.833	22.7737	132.44	145.187	132.078	136.568	5.99677	2.58418	6.006	7.951	4.646	6.201	0.272288	4.46098	Ssa08023170,-,PPI_Ypi1
Ssa07020729	110.63	66.44	90.41	89.16	181.592	807.467	614.72	534.593	5.99588	2.58397	52.318	73.195	87.335	70.9493	0.795753	2.91358	Ssa07020729,Universal stress protein family,Usp
Ssa09024081	6.561	4.328	10.319	7.06933	45.434	74.569	6.979	42.3273	5.98746	2.58194	0	0	0	0	0	#DIV/0!	Ssa09024081,36.4 kDa proline-rich,Hydrophob_seed
Ssa05016374	6.631	5.901	1.591	4.70767	6.552	14.721	63.279	28.184	5.98683	2.58179	5.096	6.358	14.189	8.54767	1.81569	1.72127	Ssa05016374,-,-
Ssa06019309	0	0.031	0.037	0.0226667	0.058	0.038	0.31	0.135333	5.97059	2.57787	95.921	62.011	65.22	74.384	3281.65	-9.10233	Ssa06019309,Belongs to the UDP-glycosyltransferase family,UDPGT
Ssa09025110	1.638	1.835	2.004	1.82567	5.839	15.61	11.248	10.899	5.96987	2.5777	825.085	894.03	594.72	771.278	422.464	-6.14498	Ssa09025110,RNA polymerase sigma factor,"Sigma70_r2,Sigma70_r3,Sigma70_r4"
Ssa13008289	162.773	16.976	21.639	67.1293	322.52	547.314	330.114	399.983	5.95839	2.57492	114.884	148.657	90.683	118.075	1.75891	1.76024	Ssa13008289,Auxin responsive protein,Auxin_inducible
Ssa12007051	0.138	0.311	0.363	0.270667	1.93	1.41	1.494	1.61133	5.9532	2.57367	132.499	103.818	141.609	125.975	465.426	-6.28874	Ssa12007051,transcription,Myb_DNA-binding
Ssa11005317	9.904	7.924	15.43	11.086	71.378	85.844	40.747	65.9897	5.95252	2.5735	0.758	1.343	0	0.700333	0.0631728	6.55805	Ssa11005317,Belongs to the sterol desaturase family,FA_hydroxylase
Ssa12006854	17.626	10.228	9.318	12.3907	72.017	54.808	93.51	73.445	5.92745	2.56741	7.37	7.264	7.051	7.22833	0.583369	3.34493	Ssa12006854,"Protein FAF-like, chloroplastic",FAF
Ssa04015543	0.402	0	0.265	0.222333	0.743	1.545	1.664	1.31733	5.92504	2.56682	0	0	0	0	0	#DIV/0!	Ssa04015543,transcription factor,Myb_DNA-binding
Ssa12006964	264.376	67.453	424.469	252.099	657.454	2864.74	940.756	1487.65	5.90105	2.56097	48.417	47.86	45.673	47.3167	0.187691	4.97454	Ssa12006964,Wound induced protein,DUF3774
Ssa04014320	12.143	27.299	30.761	23.401	173.389	129.45	111.17	138.003	5.89731	2.56006	6.964	7.502	10.367	8.27767	0.353731	4.05933	Ssa04014320,Belongs to the class-III pyridoxal-phosphate-dependent aminotransferase family,Aminotran_3
Ssa09024850	0.273	0.123	0.192	0.196	1.286	1.479	0.699	1.15467	5.89116	2.55855	0.12	0.043	0.126	0.0963333	0.491497	3.5833	Ssa09024850,Belongs to the glycosyl hydrolase 17 family,Glyco_hydro_17
Ssa08023568	0.584	0.486	1.352	0.807333	1.705	10.505	2.019	4.743	5.8749	2.55456	26.994	21.487	12.473	20.318	25.1668	-2.09889	Ssa08023568,DUF4210,"Chromosome_seg,DUF4210"
Ssa01001679	1.956	1.439	1.701	1.69867	7.133	11.645	11.107	9.96167	5.8644	2.55198	0.017	0.053	0.053	0.041	0.0241366	7.92462	Ssa01001679,LRR receptor-like serine threonine-protein kinase,"LRR_8,Malectin_like,Pkinase,Pkinase_Tyr"
Ssa07020854	12.708	6.358	9.737	9.601	38.788	79.71	50.366	56.288	5.86272	2.55157	3.737	6.918	5.757	5.47067	0.569802	3.36304	Ssa07020854,Protein LIGHT-DEPENDENT SHORT HYPOCOTYLS,DUF640
Ssa08023474	16.043	16.937	14.265	15.7483	131.57	44.51	100.859	92.313	5.86176	2.55133	0.084	0.089	0.132	0.101667	0.00645571	9.82654	Ssa08023474,BTB POZ and TAZ domain-containing protein,"BTB,zf-TAZ"
Ssa09024783	3.83	4.91	4.371	4.37033	18.335	30.802	27.566	25.5677	5.85028	2.54851	26.1	28.872	31.674	28.882	6.60865	-0.17585	Ssa09024783,-,-
Ssa13008760	19.762	26.924	44.672	30.4527	233.059	242.401	58.613	178.024	5.84594	2.54743	2.589	2.713	4.19	3.164	0.103899	5.81418	Ssa13008760,fasciclin-like arabinogalactan protein,Fasciclin
Ssa11006165	0	0.033	0.038	0.0236667	0.12	0.156	0.139	0.138333	5.84507	2.54722	11.062	8.986	4.471	8.173	345.338	-5.88464	Ssa11006165,Belongs to the cytochrome P450 family,p450
Ssa03013554	19.909	26.851	44.543	30.4343	232.629	242.047	58.717	177.798	5.84201	2.54646	2.661	2.713	4.19	3.188	0.10475	5.80144	Ssa03013554,fasciclin-like arabinogalactan protein,Fasciclin
Ssa10003511	45.743	22.463	47.584	38.5967	318.17	311.387	46.482	225.346	5.83849	2.5456	1.503	0.82	0.853	1.05867	0.027429	7.73375	Ssa10003511,Belongs to the glycosyl hydrolase 17 family,Glyco_hydro_17
Ssa01002012	0	0	0.27	0.09	0	1.576	0	0.525333	5.83704	2.54524	0	0	0	0	0	#DIV/0!	Ssa01002012,Soybean trypsin inhibitor (Kunitz) family of protease inhibitors,Kunitz_legume
Ssa07020550	1.605	0.744	0.724	1.02433	8.223	2.829	6.882	5.978	5.83599	2.54498	0.212	0.547	0.159	0.306	0.298731	4.28806	Ssa07020550,Plant protein of unknown function (DUF641),DUF641
Ssa06018429	0.929	0.653	0.981	0.854333	5.298	2.296	7.343	4.979	5.82794	2.54299	1.411	2.274	1.242	1.64233	1.92236	1.60011	Ssa06018429,ELMO domain-containing protein,ELMO_CED12
Ssa03013652	10	11.027	10.358	10.4617	27.272	99.774	55.825	60.957	5.8267	2.54268	2.633	1.967	4.105	2.90167	0.277362	4.39284	Ssa03013652,F-box LRR-repeat protein,"LRR_5,LRR_6,LRR_8"
Ssa10003839	4.658	4.91	9.699	6.42233	3.231	103.219	5.806	37.4187	5.82634	2.54259	0	0.364	0.24	0.201333	0.0313489	7.53803	Ssa10003839,Rare lipoprotein A (RlpA)-like double-psi beta-barrel,DPBB_1
Ssa12006956	1.236	1.176	1.889	1.43367	10.291	11.181	3.58	8.35067	5.82469	2.54218	0.765	1.068	2.862	1.565	1.09161	2.41573	Ssa12006956,GPI-anchored protein,-
Ssa02011011	6.386	2.482	2.628	3.832	16.91	30.74	19.257	22.3023	5.82002	2.54103	28.316	36.211	45.305	36.6107	9.55393	-0.715069	Ssa02011011,Protein LOW PSII ACCUMULATION 2,-
Ssa12006523	0	0.033	0	0.011	0.061	0.06	0.071	0.064	5.81818	2.54057	173.576	124.561	150.465	149.534	13594	-11.1901	Ssa12006523,"Plant lipoxygenase may be involved in a number of diverse aspects of plant physiology including growth and development, pest resistance, and senescence or responses to wounding","Lipoxygenase,PLAT"
Ssa02011952	2.662	6.414	6.323	5.133	27.206	48.871	13.366	29.8143	5.80836	2.53813	101.945	85.266	94.696	93.969	18.3068	-1.65618	Ssa02011952,40S ribosomal protein,Ribosomal_S25
Ssa05016561	0.641	0.351	0.102	0.364667	4.282	1.633	0.435	2.11667	5.80439	2.53714	0.128	0.182	1.708	0.672667	1.84461	1.65383	Ssa05016561,Belongs to the peroxidase family. Classical plant (class III) peroxidase subfamily,peroxidase
Ssa01000349	31.989	11.827	24.184	22.6667	107.369	219.502	67.024	131.298	5.79257	2.5342	14.011	22.598	25.203	20.604	0.909	2.67185	Ssa01000349,Transmembrane protein 205,DUF4149
Ssa07021072	134.303	118.495	113.195	121.998	438.947	575.106	1103.19	705.749	5.78494	2.5323	3588.53	4635.98	230.433	2818.32	23.1014	-1.99761	Ssa07021072,Vacuolar-processing enzyme-like,Peptidase_C13
Ssa02011844	0.297	1.566	2.613	1.492	8.929	15.045	1.904	8.626	5.7815	2.53144	0	0	0	0	0	#DIV/0!	Ssa02011844,-,-
Ssa07021747	0.42	0.211	0.4	0.343667	2.523	3.132	0.299	1.98467	5.77498	2.52981	5.014	3.798	3.05	3.954	11.5053	-0.994416	Ssa07021747,Protein NRT1 PTR FAMILY,PTR2
Ssa01000613	6.423	6.422	5.651	6.16533	49.764	43.042	14.005	35.6037	5.77482	2.52978	2.322	2.139	1.95	2.137	0.346615	4.05837	Ssa01000613,Pollen proteins Ole e I like,Pollen_Ole_e_I
Ssa13008201	2.514	3.931	6.918	4.45433	40.479	20.694	15.942	25.705	5.77079	2.52877	0.711	0.755	3.581	1.68233	0.377685	3.93351	Ssa13008201,Belongs to the glucose-6-phosphate 1-epimerase family,Aldose_epim
Ssa09025645	3.952	4.124	5.961	4.679	35.957	20.12	24.914	26.997	5.76982	2.52853	1.494	1.456	1.22	1.39	0.297072	4.27964	Ssa09025645,RING-H2 finger protein,zf-RING_2
Ssa06017989	0.356	0.747	0.738	0.613667	3.869	3.174	3.559	3.534	5.75883	2.52577	0.374	0.318	0.412	0.368	0.599674	3.26352	Ssa06017989,Ecotropic viral integration site 5 protein homolog,RabGAP-TBC
Ssa11006012	7.174	3.858	13.852	8.29467	35.46	65.133	42.701	47.7647	5.75848	2.52569	3.904	5.314	4.745	4.65433	0.561124	3.3593	Ssa11006012,MADS-box protein,"K-box,SRF-TF"
Ssa13008593	5.017	2.974	3.005	3.66533	13.428	26.84	23.039	21.1023	5.75728	2.52539	3.06	4.754	4.943	4.25233	1.16015	2.31108	Ssa13008593,Aux IAA proteins are short-lived transcriptional factors that function as repressors of early auxin response genes at low auxin concentrations,AUX_IAA
Ssa06019350	0.825	1.419	1.036	1.09333	7.245	8.416	3.209	6.29	5.75305	2.52433	1.039	1.196	1.091	1.10867	1.01402	2.50423	Ssa06019350,Heavy-metal-associated domain,HMA
Ssa05017171	2.411	1.238	0.964	1.53767	3.193	10.111	13.233	8.84567	5.75266	2.52423	48.503	42.474	59.546	50.1743	32.6302	-2.50391	Ssa05017171,Thioredoxin M3,Thioredoxin
Ssa03013726	4.911	3.054	3.099	3.688	13.577	26.937	23.096	21.2033	5.74928	2.52338	2.668	4.754	4.86	4.094	1.11009	2.37271	Ssa03013726,Aux IAA proteins are short-lived transcriptional factors that function as repressors of early auxin response genes at low auxin concentrations,AUX_IAA
Ssa03013749	0.745	0.187	0.71	0.547333	0.833	6.348	2.256	3.14567	5.74726	2.52287	0	0	0	0	0	#DIV/0!	Ssa03013749,Regulator of Vps4 activity in the MVB pathway,Ist1
Ssa02009462	0	0	0.054	0.018	0.086	0.224	0	0.103333	5.74074	2.52124	0	0	0	0	0	#DIV/0!	Ssa02009462,"Receptor homology region, transmembrane domain- and RING domain-containing protein","PA,zf-RING_2"
Ssa02010026	0.349	0.157	0.123	0.209667	1.161	1.324	1.117	1.20067	5.72655	2.51767	0.205	0.49	0.054	0.249667	1.19078	2.26576	Ssa02010026,Glucose and ribitol,"adh_short,adh_short_C2"
Ssa06018619	9.185	6.115	40.488	18.596	55.465	203.517	60.452	106.478	5.72586	2.51749	3.66	3.777	3.096	3.511	0.188804	4.92253	Ssa06018619,kelch repeat-containing protein,"Kelch_1,Kelch_4,Kelch_6"
Ssa12006896	0.641	0.965	1.127	0.911	4.325	4.055	7.254	5.21133	5.72045	2.51613	0	0	0	0	0	#DIV/0!	Ssa12006896,-,DUF4228
Ssa09025169	1.217	3.136	2.47	2.27433	10.258	25.436	3.325	13.0063	5.71875	2.5157	0.619	0.622	0.542	0.594333	0.261322	4.4518	Ssa09025169,At4g06744-like,-
Ssa03012789	0	0	0.157	0.0523333	0.412	0.484	0	0.298667	5.70701	2.51273	0	0	0	0	0	#DIV/0!	Ssa03012789,-,-
Ssa12007755	10.007	11.257	13.047	11.437	72.486	57.575	65.694	65.2517	5.70531	2.51231	11.167	9.42	10.793	10.46	0.914576	2.64113	Ssa12007755,two-component response regulator,Response_reg
Ssa05016837	6.832	6.996	4.688	6.172	26.162	25.581	53.869	35.204	5.70382	2.51193	21.093	27.436	18.98	22.503	3.64598	0.645622	Ssa05016837,60S ribosomal Protein,-
Ssa13009171	1.4	0.568	0.474	0.814	4.814	2.045	7.037	4.632	5.69042	2.50853	0.581	1.374	1.524	1.15967	1.42465	1.99793	Ssa13009171,Adenine guanine permease,Xan_ur_permease
Ssa03012857	9.613	53.81	23.458	28.9603	297.37	108.271	88.174	164.605	5.68381	2.50686	0.133	0.567	0.28	0.326667	0.0112798	8.97697	Ssa03012857,SPIRAL1-like 5,-
Ssa09025488	207.365	54.967	303.433	188.588	262.835	2241.87	706.416	1070.37	5.67571	2.5048	85.75	107.744	99.783	97.759	0.518372	3.45274	Ssa09025488,Universal stress protein A-like protein,Usp
Ssa01001713	8.729	10.151	9.983	9.621	11.886	20.35	131.544	54.5933	5.67439	2.50447	4.634	3.334	4.64	4.20267	0.436822	3.69935	Ssa01001713,Cotton fibre expressed protein,DUF761
Ssa04014794	3.243	17.89	10.499	10.544	65.853	52.564	60.916	59.7777	5.66935	2.50318	0	0	0	0	0	#DIV/0!	Ssa04014794,Plasma membrane ATPase,"Cation_ATPase_N,E1-E2_ATPase,Hydrolase"
Ssa01000912	0.622	0.647	0.691	0.653333	3.105	3.016	4.988	3.703	5.66786	2.5028	218.778	175.544	271.3	221.874	339.603	-5.9049	Ssa01000912,Magnesium-chelatase subunit ChlH,"CobN-Mg_chel,DUF3479"
Ssa07020600	3.405	2.304	3.3	3.003	12.256	27.851	10.94	17.0157	5.66622	2.50239	0	0	0.038	0.0126667	0.004218	10.3916	Ssa07020600,GDSL/SGNH-like Acyl-Esterase family found in Pmr5 and Cas1p,"PC-Esterase,PMR5N"
Ssa03012478	23.802	20.162	25.691	23.2183	81.182	220.056	92.89	131.376	5.65829	2.50037	13.447	17.477	30.103	20.3423	0.876132	2.69114	Ssa03012478,ethylene-responsive transcription factor,AP2
Ssa04015738	20.681	5.561	11.534	12.592	59.265	78.992	75.46	71.239	5.65748	2.50016	14.659	15.653	17.242	15.8513	1.25884	2.16806	Ssa04015738,Fk506-binding protein,HMA
Ssa13008199	1.834	2.68	3.417	2.64367	17.611	15.171	12.073	14.9517	5.65566	2.49969	0.159	0.211	0.291	0.220333	0.0833438	6.08447	Ssa13008199,Belongs to the 'GDSL' lipolytic enzyme family,Lipase_GDSL
Ssa11006130	28.788	16.84	22.194	22.6073	137.053	153.052	93.02	127.708	5.64898	2.49799	31.335	29.563	28.885	29.9277	1.3238	2.0933	Ssa11006130,-,-
Ssa10004797	2.154	1.286	3.92	2.45333	24.865	10.679	6.03	13.858	5.64864	2.4979	0.6	0.348	1.032	0.66	0.269022	4.39211	Ssa10004797,"Thioredoxin-like 1-2, chloroplastic",Thioredoxin
Ssa02009636	2.417	1.979	2.219	2.205	10.5	9.791	17.069	12.4533	5.64777	2.49768	0	0	0	0	0	#DIV/0!	Ssa02009636,transcription factor,HLH
Ssa12007948	0.154	0.232	0.203	0.196333	1.318	0.279	1.729	1.10867	5.64686	2.49745	11.668	7.043	11.655	10.122	51.5552	-3.1906	Ssa12007948,Uncharacterized conserved protein (DUF2358),DUF2358
Ssa02010643	7.002	4.697	4.592	5.43033	25.14	37.881	28.971	30.664	5.6468	2.49743	0.374	0.298	0	0.224	0.0412498	7.0969	Ssa02010643,Plastid division protein,Globin
Ssa10003953	2.635	1.984	1.803	2.14067	5.958	7.547	22.758	12.0877	5.64668	2.4974	2.26	2.288	2.598	2.382	1.11274	2.34329	Ssa10003953,-,-
Ssa11006298	3.258	3.087	3.699	3.348	11.666	24.431	20.551	18.8827	5.63998	2.49569	722.738	895.842	732.928	783.836	234.121	-5.37542	Ssa11006298,NADH dehydrogenase transmembrane subunit,NdhL
Ssa10003313	13.375	4.054	10.621	9.35	80.129	56.397	21.527	52.6843	5.63469	2.49434	0	0.068	0.067	0.045	0.00481283	10.1932	Ssa10003313,transcription factor,AP2
Ssa09025517	1.561	1.253	2.197	1.67033	11.404	9.88	6.947	9.41033	5.63381	2.49411	6.271	7.803	8.43	7.50133	4.49092	0.327099	Ssa09025517,Aspartate aminotransferase,Aminotran_1_2
Ssa10003991	0	0	0.053	0.0176667	0.168	0	0.13	0.0993333	5.62264	2.49125	0.045	0	0.047	0.0306667	1.73585	1.69561	Ssa10003991,Glycosyltransferase,Exostosin
Ssa13008704	5.607	8.201	11.725	8.511	69.137	41.148	33.215	47.8333	5.62018	2.49062	62.496	56.477	60.076	59.683	7.01245	-0.319304	Ssa13008704,magnesium transporter,CorA
Ssa06019650	4.211	4.132	3.915	4.086	21.311	21.353	26.077	22.9137	5.60785	2.48745	9.286	7.344	6.884	7.838	1.91826	1.54765	Ssa06019650,lysine-specific demethylase,"FYRC,FYRN,JmjC,JmjN,zf-C5HC2"
Ssa03012950	4.177	1.463	1.196	2.27867	10.108	21.788	6.435	12.777	5.60723	2.48729	0.785	1.518	1.574	1.29233	0.567145	3.3055	Ssa03012950,Domain of unknown function (DUF4228),DUF4228
Ssa03013024	2.713	1.24	0.767	1.57333	7.014	4.426	15.013	8.81767	5.60445	2.48657	0.534	0.53	0.86	0.641333	0.407627	3.78125	Ssa03013024,Belongs to the protein kinase superfamily,Pkinase_Tyr
Ssa11006411	2.207	0.791	1.48	1.49267	5.055	2.852	17.182	8.363	5.60272	2.48613	9.504	9.115	4.299	7.63933	5.11791	0.130574	Ssa11006411,GEM-like protein,GRAM
Ssa11006257	14.407	11.183	16.726	14.1053	51.379	96.851	88.703	78.9777	5.59914	2.4852	23.473	34.463	31.519	29.8183	2.11398	1.40525	Ssa11006257,-,-
Ssa08023252	5.044	4.952	4.382	4.79267	37.857	24.023	18.487	26.789	5.58958	2.48274	10.326	8.081	20.35	12.919	2.69558	1.05215	Ssa08023252,Dof zinc finger protein,zf-Dof
Ssa04015586	0	0.23	0.269	0.166333	1.415	0.553	0.817	0.928333	5.58116	2.48057	0.45	0.239	0	0.229667	1.38076	2.0151	Ssa04015586,-,-
Ssa01002406	0.478	0.27	0.421	0.389667	2.128	4.107	0.287	2.174	5.57913	2.48004	62.331	76.985	60.823	66.713	171.205	-4.93954	Ssa01002406,"Photosystem II (PSII) is a light-driven water plastoquinone oxidoreductase that uses light energy to abstract electrons from H(2)O, generating O(2) and a proton gradient subsequently used for ATP formation. It consists of a core antenna complex that captures photons, and an electron transfer chain that converts photonic excitation into a charge separation. The D1 D2 (PsbA PsbA) react…
Ssa12006804	8.682	9.967	3.757	7.46867	30.609	37.203	57.178	41.6633	5.57842	2.47986	21.972	20.128	27.57	23.2233	3.10943	0.843203	Ssa12006804,-,-
Ssa12007101	2.117	1.811	0.762	1.56333	15.398	3.568	7.119	8.695	5.56183	2.47556	0.389	0.413	1.3	0.700667	0.448188	3.63339	Ssa12007101,phospholipase,Lipase_3
Ssa06018424	12.027	3.699	20.864	12.1967	17.626	160.248	25.518	67.7973	5.55868	2.47474	0.996	1.456	2.222	1.558	0.12774	5.44346	Ssa06018424,-,-
Ssa02011772	1.025	0	0.139	0.388	2.042	1.925	2.485	2.15067	5.54296	2.47066	0	0	0	0	0	#DIV/0!	Ssa02011772,helix loop helix domain,HLH
Ssa02011467	0.657	0.405	1.419	0.827	1.271	8.593	3.862	4.57533	5.53245	2.46792	0.966	0.98	1.337	1.09433	1.32326	2.06382	Ssa02011467,Transcription factor JUNGBRUNNEN 1-like,NAM
Ssa06018501	3.565	4.49	4.403	4.15267	20.416	11.036	37.461	22.971	5.53163	2.4677	152.632	129.66	145.578	142.623	34.345	-2.63432	Ssa06018501,Thioredoxin-like 1-1,Thioredoxin
Ssa11005259	48.427	34.497	46.142	43.022	289.293	396.371	27.265	237.643	5.52376	2.46565	0	0.157	0	0.0523333	0.00121643	12.1488	Ssa11005259,lipid-transfer protein DIR1,LTP_2
Ssa13008570	0.807	0.187	0.71	0.568	0.804	6.348	2.256	3.136	5.52113	2.46496	0	0	0	0	0	#DIV/0!	Ssa13008570,Regulator of Vps4 activity in the MVB pathway,Ist1
Ssa08023732	2.441	3.954	4.376	3.59033	19.512	19.037	20.84	19.7963	5.51379	2.46304	0.508	0.252	0.284	0.348	0.0969269	5.83	Ssa08023732,VQ motif-containing protein,VQ
Ssa08021848	1.025	0	0.139	0.388	2.078	1.854	2.485	2.139	5.51289	2.46281	0	0	0	0	0	#DIV/0!	Ssa08021848,helix loop helix domain,HLH
Ssa05017280	5.978	2.163	2.117	3.41933	5.853	4.634	46.036	18.841	5.51014	2.46209	18.89	19.349	17.434	18.5577	5.42728	0.0218602	Ssa05017280,Domain of unknown function (DUF4408),DUF4408
Ssa01001747	0	0.391	0	0.130333	1.32	0	0.832	0.717333	5.50384	2.46044	22.123	9.324	9.41	13.619	104.494	-4.24683	Ssa01001747,-,-
Ssa02011161	0.097	0.11	0.256	0.154333	1.73	0.351	0.467	0.849333	5.50324	2.46028	0	0.038	0	0.0126667	0.0820734	6.06722	Ssa02011161,WAT1-related protein,EamA
Ssa09024603	0	0.124	0	0.0413333	0.382	0.299	0	0.227	5.49194	2.45731	0.122	0.517	0.128	0.255667	6.18548	-0.171572	Ssa09024603,GPI-anchored protein,-
Ssa12006763	1.069	1.61	2.509	1.72933	10.798	8.704	8.926	9.476	5.47957	2.45406	521.111	463.968	319.225	434.768	251.408	-5.51982	Ssa12006763,magnesium transporter MRS2-11,CorA
Ssa06018868	5.276	3.209	2.202	3.56233	4.004	3.854	50.698	19.5187	5.47918	2.45396	0	0.053	0	0.0176667	0.0049593	10.1096	Ssa06018868,Cotton fibre expressed protein,DUF761
Ssa08022146	0.657	0.405	1.472	0.844667	1.271	8.701	3.894	4.622	5.47198	2.45206	0.922	0.934	1.337	1.06433	1.26006	2.11857	Ssa08022146,Transcription factor JUNGBRUNNEN 1-like,NAM
Ssa12006734	5.169	6.665	11.081	7.63833	52.642	36.376	36.243	41.7537	5.46633	2.45057	0	0	0	0	0	#DIV/0!	Ssa12006734,"SANT SWI3, ADA2, N-CoR and TFIIIB'' DNA-binding domains",Myb_DNA-binding
Ssa01001760	13.117	3.935	11.451	9.501	31.707	55.89	68.158	51.9183	5.46451	2.45009	0.075	0.08	0	0.0516667	0.00543802	9.97279	Ssa01001760,Ras-related protein,Ras
Ssa10003618	0.059	0	0	0.0196667	0.055	0.267	0	0.107333	5.45763	2.44827	0	0	0	0	0	#DIV/0!	Ssa10003618,Wall-associated receptor kinase,"EGF_CA,GUB_WAK_bind,Pkinase,Pkinase_Tyr,WAK"
Ssa02011538	0.238	0.06	0.035	0.111	0.569	0.611	0.637	0.605667	5.45646	2.44796	29.141	22.375	20.599	24.0383	216.562	-5.31067	Ssa02011538,Belongs to the cytochrome P450 family,p450
Ssa08022444	0.097	0.11	0.256	0.154333	1.707	0.351	0.467	0.841667	5.45356	2.4472	0	0.038	0	0.0126667	0.0820734	6.05414	Ssa08022444,WAT1-related protein,EamA
Ssa04015320	6.283	2.404	5.528	4.73833	21.625	23.195	32.682	25.834	5.45213	2.44682	0.151	0.08	0	0.077	0.0162504	8.3902	Ssa04015320,Ras-related protein,Ras
Ssa01002666	2.619	1.775	1.642	2.012	3.119	8.854	20.936	10.9697	5.45212	2.44682	0.842	0.87	1.263	0.991667	0.492876	3.46752	Ssa01002666,Nodulin-like,"MFS_1,Nodulin-like"
Ssa08021846	23.624	12.326	12.763	16.2377	57.366	123.622	84.5	88.496	5.45004	2.44627	79.687	82.874	68.043	76.868	4.73393	0.203229	Ssa08021846,isoform X1,-
Ssa07021755	0	0.164	0.576	0.246667	0	2.169	1.864	1.34433	5.45	2.44626	0.16	0	0.168	0.109333	0.443243	3.62009	Ssa07021755,Wound-induced protein,WI12
Ssa03013505	2.393	3.256	3.043	2.89733	20.678	15.435	11.211	15.7747	5.44455	2.44481	23.67	16.824	11.835	17.443	6.02036	-0.145039	Ssa03013505,Belongs to the GRAS family,GRAS
Ssa02011774	23.557	12.376	12.763	16.232	56.997	123.562	84.286	88.2817	5.43874	2.44327	80.372	83.602	68.095	77.3563	4.76567	0.190594	Ssa02011774,isoform X1,-
Ssa13009315	1.894	2.432	4.998	3.108	16.073	29.72	4.879	16.8907	5.43458	2.44217	0	0	0	0	0	#DIV/0!	Ssa13009315,E3 ubiquitin-protein ligase,-
Ssa10003211	13.966	9.628	13.804	12.466	59.768	96.378	47.091	67.7457	5.43443	2.44213	45.133	41.805	31.984	39.6407	3.1799	0.773147	Ssa10003211,glutathione,"GST_C,GST_C_2,GST_N"
Ssa13008180	11.963	8.887	7.157	9.33567	46.546	27.193	78.262	50.667	5.42725	2.44022	218.965	215.837	200.203	211.668	22.6731	-2.06269	Ssa13008180,Uncharacterized conserved protein (DUF2358),DUF2358
Ssa09024594	8.048	3.598	18.917	10.1877	19.423	130.671	15.584	55.226	5.42087	2.43852	40.671	30.062	33.866	34.8663	3.42241	0.663513	Ssa09024594,Chaperone protein DNAj,DnaJ
Ssa04014880	0	0.166	0	0.0553333	0.102	0.797	0	0.299667	5.41566	2.43714	0.162	0	0.17	0.110667	2	1.43714	Ssa04014880,Late embryogenesis abundant (LEA) group 1,LEA_1
Ssa04015670	74.35	45.361	30.881	50.1973	53.228	48.857	712.618	271.568	5.41	2.43563	29.645	25.025	23.565	26.0783	0.519516	3.38039	Ssa04015670,Homeobox-leucine zipper protein,"HALZ,Homeobox"
Ssa01002410	1.361	0.674	0.479	0.838	1.943	2.638	9.017	4.53267	5.40891	2.43534	0.943	0.82	2.401	1.388	1.65632	1.70735	Ssa01002410,rRNA N-glycosidase,RIP
Ssa09024154	0.667	1.364	0.839	0.956667	1.719	7.846	5.958	5.17433	5.40871	2.43528	61.318	68.224	43.993	57.845	60.4652	-3.48275	Ssa09024154,AAA domain,"AAA_33,Ten1_2"
Ssa09025268	10.931	6.585	10.218	9.24467	32.102	94.293	23.577	49.9907	5.40751	2.43497	15.87	15.907	14.973	15.5833	1.68566	1.68165	Ssa09025268,protein disulfide oxidoreductase activity,Glutaredoxin
Ssa13008809	2.421	3.278	3.043	2.914	20.651	15.409	11.211	15.757	5.40734	2.43492	23.67	16.802	11.857	17.443	5.98593	-0.146655	Ssa13008809,Belongs to the GRAS family,GRAS
Ssa09025002	1.358	4.114	1.726	2.39933	14.854	6.143	17.835	12.944	5.39483	2.43158	52.523	43.889	31.005	42.4723	17.7017	-1.71424	Ssa09025002,Lectin-domain containing receptor kinase,"Lectin_legB,Pkinase_Tyr"
Ssa13008678	2.676	2.152	1.391	2.073	13.811	10.176	9.552	11.1797	5.39299	2.43109	0	0	0	0	0	#DIV/0!	Ssa13008678,transcription factor,HLH
Ssa08023702	7.338	0.953	0.89	3.06033	14.979	19.91	14.599	16.496	5.39026	2.43036	0	0	0.195	0.065	0.0212395	7.98746	Ssa08023702,-,-
Ssa04015099	0	0	0.265	0.0883333	0.558	0.545	0.322	0.475	5.37736	2.4269	12.851	16.72	12.56	14.0437	158.985	-4.88585	Ssa04015099,"One of the components of the core complex of photosystem II (PSII). It binds chlorophyll and helps catalyze the primary light-induced photochemical processes of PSII. PSII is a light- driven water plastoquinone oxidoreductase, using light energy to abstract electrons from H(2)O, generating O(2) and a proton gradient subsequently used for ATP formation",PSII
Ssa01000269	0.48	0.422	0.916	0.606	3.925	3.838	2.01	3.25767	5.37569	2.42645	0.118	0.063	0	0.0603333	0.09956	5.75474	Ssa01000269,"atexp17,atexpa17,athexp alpha 1.13,expa17","DPBB_1,Pollen_allerg_1"
Ssa01000078	54.557	26.243	70.997	50.599	191.547	466.567	157.677	271.93	5.37422	2.42606	64.052	79.912	131.425	91.7963	1.81419	1.56673	Ssa01000078,chitin binding,"Barwin,Chitin_bind_1"
Ssa09025622	81.417	51.971	73.911	69.0997	357.689	472.371	283.42	371.16	5.37137	2.42529	99.095	112.726	109.655	107.159	1.55078	1.79229	Ssa09025622,Belongs to the 14-3-3 family,2014/3/3
Ssa06018174	0.183	0.413	0.161	0.252333	2.285	0.993	0.782	1.35333	5.36328	2.42311	5.65	6.863	12.145	8.21933	32.5733	-2.6025	Ssa06018174,-,-
Ssa12007062	5.428	12.871	14.825	11.0413	84.823	87.558	4.934	59.105	5.35307	2.42037	0.357	0.57	3.001	1.30933	0.118585	5.49638	Ssa12007062,Fasciclin-like arabinogalactan protein,Fasciclin
Ssa04014671	14.727	9.488	7.881	10.6987	72.812	70.304	28.63	57.2487	5.35101	2.41981	21.875	32.145	40.304	31.4413	2.93881	0.86458	Ssa04014671,dCTP pyrophosphatase 1-like,"MazG,MazG-like"
Ssa12007035	0.043	0.032	0.151	0.0753333	0.218	0.077	0.914	0.403	5.34956	2.41942	11.418	12.971	5.58	9.98967	132.606	-4.63158	Ssa12007035,O-acyltransferase (WSD1-like),"DUF1298,WES_acyltransf"
Ssa08022632	3.198	1.915	4.284	3.13233	13.815	31.947	4.504	16.7553	5.34915	2.41931	0.214	0.454	0.561	0.409667	0.130786	5.35403	Ssa08022632,prolyl 4-hydroxylase,2OG-FeII_Oxy_3
Ssa03013640	2.737	2.152	1.391	2.09333	13.782	10.286	9.487	11.185	5.34315	2.41769	0	0	0	0	0	#DIV/0!	Ssa03013640,transcription factor,HLH
Ssa10003139	60.963	41.38	58.258	53.5337	178.676	370.814	307.415	285.635	5.33561	2.41565	0.11	2.698	0.463	1.09033	0.0203672	8.03326	Ssa10003139,Haloacid dehalogenase-like hydrolase,"HAD_2,Hydrolase,Hydrolase_like"
Ssa02011505	0.155	0.234	0.41	0.266333	2.011	2.247	0	1.41933	5.32916	2.41391	0	0	0	0	0	#DIV/0!	Ssa02011505,glutathione S-transferase,"GST_C,GST_C_2,GST_N,GST_N_3"
Ssa06018629	22.864	17.216	23.24	21.1067	94.173	96.233	146.923	112.443	5.32737	2.41342	26.87	28.789	25.981	27.2133	1.28932	2.04681	Ssa06018629,Cystinosin homolog,PQ-loop
Ssa04015582	13.191	15.891	16.783	15.2883	48.521	34.689	160.983	81.3977	5.32417	2.41256	10.293	13.159	11.275	11.5757	0.757157	2.81389	Ssa04015582,Dormancy/auxin associated protein,Auxin_repressed
Ssa05017388	3.2	3.561	4.406	3.72233	22.346	24.325	12.733	19.8013	5.3196	2.41132	19.225	22.716	17.964	19.9683	5.36447	-0.0121163	Ssa05017388,Hippocampus abundant,MFS_1
Ssa09025548	5.535	4.506	3.817	4.61933	23.663	25.979	24.056	24.566	5.31808	2.41091	0.11	0.701	0.231	0.347333	0.0751912	6.1442	Ssa09025548,RNA binding,-
Ssa08023414	15.577	1.08	22.36	13.0057	5.403	184.446	17.409	69.086	5.31199	2.40925	0.301	0	0.316	0.205667	0.0158136	8.39194	Ssa08023414,-,-
Ssa08023182	0.172	0	0	0.0573333	0.637	0	0.276	0.304333	5.30814	2.40821	0	0	0	0	0	#DIV/0!	Ssa08023182,Domain of unknown function (DUF4666),DUF4666
Ssa04014422	11.264	14.03	14.53	13.2747	52.017	48.411	110.802	70.41	5.30409	2.4071	5.043	4.698	4.314	4.685	0.352928	3.90966	Ssa04014422,Prokaryotic RING finger family 4,zf-C3HC4_3
Ssa01001645	20.278	19.756	92.08	44.038	174.049	291.338	234.511	233.299	5.29768	2.40536	0.801	0.965	1.683	1.14967	0.0261062	7.66482	Ssa01001645,2-aminoethanethiol dioxygenase-like,PCO_ADO
Ssa02010404	0	0	0.054	0.018	0	0.221	0.065	0.0953333	5.2963	2.40498	0	0	0	0	0	#DIV/0!	Ssa02010404,Belongs to the peroxidase family. Classical plant (class III) peroxidase subfamily,peroxidase
Ssa11005516	0.126	0.158	0.185	0.156333	1.46	0.343	0.674	0.825667	5.28145	2.40093	0.031	0.033	0.097	0.0536667	0.343284	3.94346	Ssa11005516,Belongs to the multi antimicrobial extrusion (MATE) (TC 2.A.66.1) family,MatE
Ssa04014824	11.447	10.289	11.283	11.0063	53.409	46.723	73.954	58.0287	5.2723	2.39843	48.064	49.023	56.238	51.1083	4.64354	0.183207	Ssa04014824,Transcription factor,Myb_DNA-bind_4
Ssa02010063	0.586	0	1.03	0.538667	3.792	4.237	0.469	2.83267	5.25866	2.3947	0	0	0	0	0	#DIV/0!	Ssa02010063,-,-
Ssa02010883	0.623	0.503	0.313	0.479667	2.861	1.409	3.293	2.521	5.25573	2.39389	2.47	2.643	2.353	2.48867	5.18833	0.0186231	Ssa02010883,-,-
Ssa06018197	41.168	53.353	70.532	55.0177	326.562	274.405	265.702	288.89	5.25085	2.39255	32.673	30.906	30.165	31.248	0.567963	3.20868	Ssa06018197,BEL1-like homeodomain protein,"Homeobox_KN,POX"
Ssa08023392	13.849	10.845	2.715	9.13633	37.184	23.977	82.731	47.964	5.24981	2.39226	6.05	8.285	6.962	7.099	0.777008	2.75626	Ssa08023392,Pollen-specific protein SF3-like,LIM
Ssa09024627	3.14	5.713	3.913	4.25533	7.946	11.122	47.943	22.337	5.24918	2.39209	85.848	85.927	89.786	87.187	20.4889	-1.96468	Ssa09024627,Protein of unknown function (DUF2488),Ycf54
Ssa12007696	0.43	0.032	0	0.154	1.431	0.622	0.367	0.806667	5.2381	2.38904	0	0	0	0	0	#DIV/0!	Ssa12007696,Belongs to the UDP-glycosyltransferase family,UDPGT
Ssa07020177	0	0	0.077	0.0256667	0.324	0.079	0	0.134333	5.23377	2.38785	0	0	0	0	0	#DIV/0!	Ssa07020177,choline kinase,"Choline_kin_N,Choline_kinase"
Ssa03013827	0.176	0.198	0.27	0.214667	0.061	3.215	0.094	1.12333	5.23292	2.38762	0.129	0.137	0.474	0.246667	1.14907	2.18715	Ssa03013827,Protein of unknown function (DUF563),DUF563
Ssa03012464	13.155	11.179	13.352	12.562	51.4	85.488	60.032	65.64	5.22528	2.38551	5.548	4.801	6.079	5.476	0.435918	3.58338	Ssa03012464,PI-PLC X domain-containing protein,-
Ssa07020840	3.468	2.544	3.99	3.334	26.648	14.034	11.567	17.4163	5.22386	2.38511	14.838	14.971	16.572	15.4603	4.63717	0.171869	Ssa07020840,UDP-glycosyltransferase 87A1-like,UDPGT
Ssa10003112	16.955	5.435	5.332	9.24067	29.256	11.824	103.598	48.226	5.21889	2.38374	4.555	4.096	3.573	4.07467	0.440949	3.56506	Ssa10003112,Protein FANTASTIC FOUR,FAF
Ssa04015439	2.76	1.585	2.064	2.13633	11.889	10.985	10.544	11.1393	5.21423	2.38245	1.015	1.213	1.252	1.16	0.542986	3.26347	Ssa04015439,Belongs to the GMC oxidoreductase family,"GMC_oxred_C,GMC_oxred_N"
Ssa03012328	2.84	1.364	1.05	1.75133	4.207	5.174	18.007	9.12933	5.21279	2.38206	0.242	0.225	0.54	0.335667	0.191663	4.76541	Ssa03012328,Belongs to the AAA ATPase family,"AAA,AAA_assoc"
Ssa09024206	2.147	4.336	2.705	3.06267	15.595	15.492	16.762	15.9497	5.20777	2.38067	0.359	0.114	0.075	0.182667	0.059643	6.44817	Ssa09024206,Kelch,"F-box,F-box-like,Kelch_1,zf-RING_2"
Ssa02009961	4.98	7.065	5.626	5.89033	31.006	25.791	35.171	30.656	5.20446	2.37975	49.015	38.661	45.792	44.4893	7.55294	-0.53729	Ssa02009961,Belongs to the TUB family,"F-box,Tub"
Ssa11005453	78.705	14.507	147.745	80.319	120.509	566.994	561.759	416.421	5.18458	2.37423	44.798	67.79	62.107	58.2317	0.725005	2.83817	Ssa11005453,Thiosulfate sulfurtransferase,Rhodanese
Ssa07020905	363.196	231.599	739.578	444.791	838.719	3743.5	2328.93	2303.72	5.17932	2.37276	47.097	46.472	52.096	48.555	0.109164	5.5682	Ssa07020905,-,-
Ssa06017528	3.416	4.788	6.103	4.769	20.562	33.747	19.68	24.663	5.17152	2.37059	0.579	1.068	1.663	1.10333	0.231355	4.48241	Ssa06017528,E3 ubiquitin-protein ligase,zf-RING_2
Ssa13008756	0.131	0.147	0.23	0.169333	1.268	0.413	0.941	0.874	5.16142	2.36777	0.528	0.765	1.662	0.985	5.81693	-0.17249	Ssa13008756,Quinone oxidoreductase-like protein,"ADH_N,ADH_zinc_N_2"
Ssa08023374	0	0	0.093	0.031	0.244	0.095	0.141	0.16	5.16129	2.36773	0.039	0.041	0	0.0266667	0.860215	2.58496	Ssa08023374,Zein-binding,Zein-binding
Ssa05017284	28.59	31.922	30.236	30.2493	158.908	154.409	154.646	155.988	5.15673	2.36646	5.662	6.273	6.397	6.11067	0.20201	4.67396	Ssa05017284,Phosphatidylinositol phosphatidylcholine transfer protein,"CRAL_TRIO,CRAL_TRIO_N"
Ssa03014235	0.116	0.523	0.306	0.315	1.607	1.78	1.485	1.624	5.15556	2.36613	0.681	0.271	0.894	0.615333	1.95344	1.40011	Ssa03014235,Plant invertase/pectin methylesterase inhibitor,PMEI
Ssa11005258	0.799	0.602	2.11	1.17033	9.901	7.074	1.098	6.02433	5.14754	2.36388	0.084	0.045	0.088	0.0723333	0.0618058	6.38	Ssa11005258,WAT1-related protein,EamA
Ssa01002762	5.784	3.03	2.434	3.74933	15.411	32.753	9.673	19.279	5.14198	2.36232	0	0	0	0	0	#DIV/0!	Ssa01002762,RING-type zinc-finger,zf-RING_2
Ssa10004497	0.317	0.199	0.093	0.203	1.71	0.573	0.847	1.04333	5.13957	2.36165	0	0.165	0	0.055	0.270936	4.24562	Ssa10004497,DCD,Dev_Cell_Death
Ssa01000757	0.642	0.282	0.659	0.527667	3.762	3.485	0.886	2.711	5.13771	2.36113	0.039	0.167	0.124	0.11	0.208465	4.62325	Ssa01000757,Belongs to the 'GDSL' lipolytic enzyme family,Lipase_GDSL
Ssa12007809	2.54	3.736	2.806	3.02733	13.904	6.678	26.063	15.5483	5.13598	2.36064	1759.81	1663.22	1437.05	1620.03	535.133	-6.70311	Ssa12007809,Belongs to the universal ribosomal protein uL1 family,Ribosomal_L1
Ssa10004299	11.036	6.21	7.576	8.274	25.352	73.71	28.377	42.4797	5.13411	2.36012	31.471	33.258	30.23	31.653	3.8256	0.42443	Ssa10004299,-,DUF5306
Ssa09024935	6.96	5.962	11.179	8.03367	10.217	107.874	5.628	41.2397	5.13336	2.3599	0.704	0.15	0	0.284667	0.0354342	7.17862	Ssa09024935,Belongs to the peroxidase family. Classical plant (class III) peroxidase subfamily,peroxidase
Ssa12007909	0	0.125	0.147	0.0906667	1.156	0.151	0.089	0.465333	5.13235	2.35962	0	0	0	0	0	#DIV/0!	Ssa12007909,Plant non-specific lipid-transfer proteins transfer phospholipids as well as galactolipids across membranes. May play a role in wax or cutin deposition in the cell walls of expanding epidermal cells and certain secretory tissues,Tryp_alpha_amyl
Ssa03012331	6.757	1.569	1.882	3.40267	6.64	20.116	25.628	17.4613	5.13166	2.35943	4.595	3.739	0.782	3.03867	0.893025	2.52265	Ssa03012331,SAM dependent carboxyl methyltransferase,Methyltransf_7
Ssa01000205	1.436	1.202	0.796	1.14467	6.125	6.976	4.518	5.873	5.13075	2.35917	3.167	6.649	8.907	6.241	5.45224	-0.0876796	Ssa01000205,Protein of unknown function (DUF1645),DUF1645
Ssa06018882	1.547	1.456	1.701	1.568	9.211	9.444	5.475	8.04333	5.12968	2.35887	2.558	3.172	1.492	2.40733	1.53529	1.74036	Ssa06018882,-,-
Ssa10004588	1.958	3.265	2.612	2.61167	12.14	15.008	13.005	13.3843	5.12482	2.3575	1.661	0.893	1.511	1.355	0.518826	3.30418	Ssa10004588,lysine-specific demethylase,"JmjC,JmjN,zf-C2H2"
Ssa02011753	1.206	4.503	3.649	3.11933	26.496	14.263	7.188	15.9823	5.12364	2.35717	2.73	3.542	4.578	3.61667	1.15944	2.14375	Ssa02011753,Aspartate aminotransferase,Aminotran_1_2
Ssa11005297	13.054	7.978	10.736	10.5893	41.605	77.087	44.015	54.2357	5.12173	2.35663	72.807	83.885	97.018	84.57	7.98634	-0.640904	Ssa11005297,At4g14100-like,-
Ssa01002640	1.704	1.65	1.028	1.46067	8.421	5.504	8.504	7.47633	5.11844	2.3557	4.33	4.374	4.283	4.329	2.96372	0.788297	Ssa01002640,lysM domain receptor-like kinase,"Pkinase,Pkinase_Tyr"
Ssa09024833	0.361	0.146	0.073	0.193333	0.039	2.914	0.015	0.989333	5.11724	2.35537	0	0	0	0	0	#DIV/0!	Ssa09024833,Cucumisin-like,"Inhibitor_I9,Peptidase_S8"
Ssa01000860	5.762	2.347	2.742	3.617	20.356	22.04	13.119	18.505	5.11612	2.35505	1.944	1.181	3.936	2.35367	0.650723	2.97493	Ssa01000860,Two-component response regulator,Response_reg
Ssa04014580	0.865	3.121	1.964	1.98333	4.697	7.003	18.735	10.145	5.11513	2.35477	0	0	0.035	0.0116667	0.00588235	9.76416	Ssa04014580,Pectate lyase,Pec_lyase_C
Ssa07020378	19.064	13.95	18.426	17.1467	71.692	85.887	105.379	87.6527	5.11194	2.35387	200.078	257.961	214.391	224.143	13.0721	-1.35455	Ssa07020378,Senescence regulator,Senescence_reg
Ssa13008032	0.855	0.575	0.457	0.629	3.249	2.542	3.851	3.214	5.1097	2.35324	3.233	3.699	3.3	3.41067	5.42236	-0.0856838	Ssa13008032,receptor-like serine threonine-protein kinase,Pkinase
Ssa06018598	0	0.409	0.119	0.176	0.879	0.368	1.45	0.899	5.10795	2.35275	71.941	63.099	123.392	86.144	489.455	-6.58229	Ssa06018598,Sulfite oxidase-like,"Mo-co_dimer,Oxidored_molyb"
Ssa01002494	0.152	0.229	0.401	0.260667	0.211	3.296	0.487	1.33133	5.10742	2.35259	0	0	0	0	0	#DIV/0!	Ssa01002494,-,-
Ssa05015953	1.94	5.544	4.245	3.90967	20.729	6.569	32.581	19.9597	5.10521	2.35197	24.685	21.26	24.455	23.4667	6.00222	-0.233525	Ssa05015953,F-box protein,F-box-like
Ssa05016271	9.1	0	0.449	3.183	10.069	11.076	27.486	16.2103	5.09278	2.34845	0	0	0	0	0	#DIV/0!	Ssa05016271,MADS-box transcription factor,"K-box,SRF-TF"
Ssa11006123	15.878	7.31	7.296	10.1613	54.348	57.075	43.814	51.7457	5.09241	2.34835	512.441	576.242	674.063	587.582	57.8253	-3.50528	Ssa11006123,cadmium-induced protein,-
Ssa03012471	0	0.034	0	0.0113333	0	0.124	0.049	0.0576667	5.08824	2.34717	63.958	73.897	11.625	49.8267	4396.47	-9.75496	Ssa03012471,Acetyltransferase,Transferase
Ssa01000934	2.643	7.41	8.658	6.237	44.16	35.272	15.75	31.7273	5.08695	2.3468	5.889	4.607	5.084	5.19333	0.832665	2.61099	Ssa01000934,Belongs to the multi antimicrobial extrusion (MATE) (TC 2.A.66.1) family,MatE
Ssa11005138	4.01	1.174	1.96	2.38133	13.6	12.291	10.235	12.042	5.05683	2.33823	6.715	5.918	5.502	6.045	2.53849	0.994261	Ssa11005138,-,-
Ssa13009092	1.812	1.176	1.374	1.454	4.942	7.234	9.881	7.35233	5.05663	2.33817	39.78	45.013	39.446	41.413	28.4821	-2.49381	Ssa13009092,LON peptidase N-terminal domain and RING finger protein,zf-C3HC4_3
Ssa08023662	2.411	4.186	3.889	3.49533	21.653	17.932	13.436	17.6737	5.05636	2.3381	9.429	5.155	9.252	7.94533	2.27313	1.15342	Ssa08023662,Autophagy-related protein,ATG13
Ssa11005819	7.141	6.459	5.712	6.43733	18.7	38.626	40.279	32.535	5.05411	2.33746	4.125	5.905	4.759	4.92967	0.765793	2.72243	Ssa11005819,SNF1-related protein kinase regulatory subunit gamma-1-like,CBS
Ssa04015343	8.754	5.305	2.066	5.375	30.806	7.531	43.112	27.1497	5.0511	2.3366	25.425	29.191	30.645	28.4203	5.2875	-0.065989	Ssa04015343,Dynein light,Dynein_light
Ssa11006124	3.367	1.864	2.962	2.731	15.523	17.015	8.833	13.7903	5.04955	2.33616	89.381	104.435	121.11	104.975	38.4384	-2.92832	Ssa11006124,Protein of unknown function (DUF3464),DUF3464
Ssa09024393	0.418	0.315	0.221	0.318	1.354	2.346	1.117	1.60567	5.04927	2.33607	0.4	0.229	1.162	0.597	1.87736	1.42737	Ssa09024393,Belongs to the glycosyl hydrolase 17 family,"Glyco_hydro_17,X8"
Ssa03013613	5.607	11.073	11.725	9.46833	68.967	41.189	33.264	47.8067	5.04911	2.33603	60.368	56.37	59.969	58.9023	6.22098	-0.301113	Ssa03013613,magnesium transporter,CorA
Ssa13008499	6.012	2.881	20.918	9.937	15.293	121.11	13.723	50.042	5.03593	2.33226	0.402	0	0	0.134	0.013485	8.54476	Ssa13008499,-,-
Ssa06018937	30.863	15.567	12.352	19.594	48.6	96.437	150.439	98.492	5.02664	2.32959	4.616	3.517	2.194	3.44233	0.175683	4.83855	Ssa06018937,Belongs to the iron ascorbate-dependent oxidoreductase family,"2OG-FeII_Oxy,DIOX_N"
Ssa01001423	0	0.141	0.741	0.294	1.212	3.217	0	1.47633	5.02154	2.32813	0	0	0.072	0.024	0.0816327	5.94284	Ssa01001423,Ethylene-responsive transcription factor 1B-like,AP2
Ssa01002413	3.386	8.522	6.272	6.06	38.905	46.988	5.379	30.424	5.02046	2.32782	17.228	20.121	36.448	24.599	4.05924	0.30661	Ssa01002413,Oleosin 1-like,Oleosin
Ssa03012730	0	0.095	0.668	0.254333	1.755	1.602	0.473	1.27667	5.01966	2.32759	0	0	0	0	0	#DIV/0!	Ssa03012730,lipid transfer-like protein,LTP_2
Ssa11005441	0.19	0.036	0.167	0.131	0.924	0.946	0.102	0.657333	5.01781	2.32706	0.035	0	0	0.0116667	0.0890585	5.81616	Ssa11005441,transcription factor,"HLH,bHLH-MYC_N"
Ssa12006969	90.951	24.355	194.129	103.145	195.355	1141.49	213.335	516.727	5.00972	2.32473	15.067	10.259	27.927	17.751	0.172098	4.86343	Ssa12006969,Wound induced protein,DUF3774
Ssa07021450	0.076	0.114	0.735	0.308333	3.37	1.099	0.162	1.54367	5.00649	2.3238	0	0	0	0	0	#DIV/0!	Ssa07021450,Protein TRANSPARENT TESTA,zf-C2H2
Ssa05015965	0	0.026	0	0.00866667	0	0	0.13	0.0433333	5	2.32193	0	0	0	0	0	#DIV/0!	Ssa05015965,9-cis-epoxycarotenoid dioxygenase,RPE65
Ssa11005093	14.914	17.863	22.329	18.3687	148.718	39.599	87.033	91.7833	4.99673	2.32099	53.214	59.011	95.843	69.356	3.77578	0.404212	Ssa11005093,LOB domain-containing protein,LOB
Ssa06019506	0.205	0.464	0.633	0.434	3.088	2.555	0.851	2.16467	4.98771	2.31838	10.082	9.752	5.669	8.501	19.5876	-1.97349	Ssa06019506,NAC domain-containing protein,NAM
Ssa09024801	5.134	12.038	11.495	9.55567	47.897	44.776	50.308	47.6603	4.98765	2.31836	1.258	1.565	1.611	1.478	0.154673	5.01107	Ssa09024801,glycerol-3-phosphate acyltransferase,"Acyltransferase,HAD"
Ssa03013928	0.115	0.043	0.051	0.0696667	0	1.041	0	0.347	4.98086	2.3164	1.016	1.619	2.444	1.693	24.3014	-2.28657	Ssa03013928,strictosidine,Str_synth
Ssa06018397	1.224	1.44	2.624	1.76267	8.135	10.514	7.681	8.77667	4.9792	2.31591	20.239	20.315	20.892	20.482	11.6199	-1.22261	Ssa06018397,psbP domain-containing protein 6,PsbP
Ssa10004080	0	0.154	0.361	0.171667	1.232	1.112	0.219	0.854333	4.9767	2.31519	0.301	0.16	0.475	0.312	1.81748	1.45325	Ssa10004080,ribosome localization,Ras
Ssa09025380	0	0	0.076	0.0253333	0.08	0.275	0.023	0.126	4.97368	2.31431	0	0	0	0	0	#DIV/0!	Ssa09025380,ACT domain,"ACT,ACT_6"
Ssa13009255	0	0	0.185	0.0616667	0.56	0.191	0.169	0.306667	4.97297	2.31411	7.049	6.833	16.508	10.13	164.27	-5.04582	Ssa13009255,Chlorophyll synthase,UbiA
Ssa03014147	0.659	0.682	0.869	0.736667	6.224	2.829	1.935	3.66267	4.97195	2.31381	2.965	2.187	2.954	2.702	3.66787	0.438867	Ssa03014147,Belongs to the glycosyl hydrolase 17 family,"Glyco_hydro_17,X8"
Ssa07020924	2.36	1.684	1.749	1.931	13.184	12.527	3.052	9.58767	4.96513	2.31183	0.365	0.631	0	0.332	0.171932	4.85192	Ssa07020924,Mitochondrial calcium uniporter,MCU
Ssa08022618	7.053	3.23	3.774	4.68567	2.436	64.516	2.814	23.2553	4.96308	2.31124	0.063	0.292	0.044	0.133	0.0283844	7.44999	Ssa08022618,1-deoxy-D-xylulose-5-phosphate synthase 2,"DXP_synthase_N,Transket_pyr,Transketolase_C"
Ssa03013280	0.193	0.097	0.226	0.172	1.456	1.104	0	0.853333	4.96124	2.3107	0	0.05	0	0.0166667	0.0968992	5.67807	Ssa03013280,"Catalyzes xyloglucan endohydrolysis (XEH) and or endotransglycosylation (XET). Cleaves and religates xyloglucan polymers, an essential constituent of the primary cell wall, and thereby participates in cell wall construction of growing tissues","Glyco_hydro_16,XET_C"
Ssa08023372	3.856	2.957	5.529	4.114	21.699	18.021	21.478	20.3993	4.95852	2.30991	11.392	12.275	20.336	14.6677	3.56531	0.475883	Ssa08023372,Dynein light chain type 1,Dynein_light
Ssa07019914	1.035	0.828	0.758	0.873667	3.239	2.846	6.896	4.327	4.95269	2.30821	0.238	0.202	0.233	0.224333	0.256772	4.26965	Ssa07019914,-,-
Ssa12006651	5.736	4.635	6.093	5.488	27.531	25.275	28.55	27.1187	4.94145	2.30493	3.214	2.268	8.07	4.51733	0.823129	2.58574	Ssa12006651,Interactor of constitutive active ROPs,-
Ssa07021492	2.712	1.282	1.443	1.81233	7.146	3.993	15.699	8.946	4.93618	2.30339	10.709	11.382	10.561	10.884	6.00552	-0.282894	Ssa07021492,expressed protein,BPS1
Ssa02010160	0.181	0.136	0.238	0.185	0.793	1.797	0.145	0.911667	4.92793	2.30098	0.066	0	0.07	0.0453333	0.245045	4.32986	Ssa02010160,"Catalyzes the phosphorylation of D-fructose 6-phosphate to fructose 1,6-bisphosphate by ATP, the first committing step of glycolysis",PFK
Ssa08022561	1.939	2.711	2.437	2.36233	7.429	18.287	9.174	11.63	4.9231	2.29957	0	0.649	0.214	0.287667	0.121772	5.33731	Ssa08022561,-,-
Ssa08022912	0.126	0.142	0.111	0.126333	0.525	0.228	1.112	0.621667	4.92084	2.29891	0	0	0	0	0	#DIV/0!	Ssa08022912,Plant intracellular ras-group-related LRR protein,LRR_8
Ssa09024053	20.386	34.469	49.629	34.828	195.458	181.044	137.283	171.262	4.91736	2.29788	5.64	4.51	8.402	6.184	0.177558	4.79152	Ssa09024053,-,O-FucT
Ssa10004652	0.926	0.976	1.086	0.996	3.94	6.756	3.99	4.89533	4.91499	2.29719	0.045	0	0.191	0.0786667	0.0789826	5.95951	Ssa10004652,Belongs to the short-chain dehydrogenases reductases (SDR) family,adh_short
Ssa11005028	6.517	7.965	7.146	7.20933	27.432	26.14	52.626	35.3993	4.91021	2.29578	63.6	76.377	69.682	69.8863	9.69387	-0.981288	Ssa11005028,Belongs to the CDI family. ICK KRP subfamily,CDI
Ssa04015728	3.01	1.302	1.127	1.813	10.397	4.229	12.078	8.90133	4.90973	2.29564	19.634	22.118	42.656	28.136	15.519	-1.66032	Ssa04015728,Belongs to the glucose-6-phosphate 1-epimerase family,Aldose_epim
Ssa10003883	0.432	0.232	0.091	0.251667	0.495	0.13	3.078	1.23433	4.90464	2.29415	0	0	0	0	0	#DIV/0!	Ssa10003883,Belongs to the protein kinase superfamily. Ser Thr protein kinase family,"LRRNT_2,LRR_1,LRR_4,LRR_6,LRR_8,Pkinase"
Ssa09025049	2.371	1.849	3.577	2.599	9.244	13.022	15.971	12.7457	4.90407	2.29398	23.721	26.667	88.104	46.164	17.7622	-1.85676	Ssa09025049,Rhodanese-like domain-containing protein 14,Rhodanese
Ssa03012892	0.443	0.25	0.682	0.458333	2.408	3.206	1.124	2.246	4.90036	2.29289	0.081	0	0	0.027	0.0589091	6.37825	Ssa03012892,"Dirigent proteins impart stereoselectivity on the phenoxy radical-coupling reaction, yielding optically active lignans from two molecules of coniferyl alcohol in the biosynthesis of lignans, flavonolignans, and alkaloids and thus plays a central role in plant secondary metabolism",Dirigent
Ssa12006533	1.158	2.007	2.314	1.82633	8.727	11.294	6.821	8.94733	4.89907	2.29251	3.429	3.617	5.468	4.17133	2.28399	1.10095	Ssa12006533,-,-
Ssa06019106	16.846	9.83	7.411	11.3623	39.409	54.342	72.969	55.5733	4.89101	2.29013	61.918	55.937	61.859	59.9047	5.27222	-0.108276	Ssa06019106,-,-
Ssa04014626	7.408	3.626	4.481	5.17167	12.291	24.372	39.031	25.2313	4.87876	2.28652	12.73	14.47	17.294	14.8313	2.86781	0.766568	Ssa04014626,-,-
Ssa08021857	0	0.561	0.656	0.405667	3.217	1.91	0.796	1.97433	4.86689	2.283	0	0	0	0	0	#DIV/0!	Ssa08021857,Protein LIGHT-DEPENDENT SHORT HYPOCOTYLS,DUF640
Ssa13008038	3.092	6.877	5.125	5.03133	23.015	5.529	44.872	24.472	4.86392	2.28212	8.617	6.237	6.771	7.20833	1.43269	1.76339	Ssa13008038,f-box protein,"F-box,PP2"
Ssa10003257	0.897	0.676	1.032	0.868333	6.351	3.37	2.949	4.22333	4.86372	2.28206	0.051	0.108	0.213	0.124	0.142802	5.08997	Ssa10003257,cysteine-rich repeat secretory protein,Stress-antifung
Ssa12006715	0.896	0.096	0.676	0.556	1.894	5.903	0.308	2.70167	4.85911	2.28069	112.036	142.22	256.954	170.403	306.481	-5.97896	Ssa12006715,Kiwellin-like,-
Ssa01000368	0	0.053	0.062	0.0383333	0.21	0.348	0	0.186	4.85217	2.27863	0	0.301	0	0.100333	2.61739	0.890502	Ssa01000368,Ethylene response sensor,"GAF,HATPase_c,HisKA,Response_reg"
Ssa06018860	0.333	0.125	0.244	0.234	0.771	0.854	1.78	1.135	4.85043	2.27811	516.923	435.701	545.445	499.356	2134	-8.78123	Ssa06018860,Zinc finger protein CONSTANS-like,"CCT,zf-B_box"
Ssa06018640	0	0.09	0	0.03	0.111	0.325	0	0.145333	4.84444	2.27633	0.088	0	0	0.0293333	0.977778	2.30875	Ssa06018640,Early nodulin-like protein,Cu_bind_like
Ssa11006231	13.552	9.659	19.348	14.1863	76.144	73.975	55.982	68.7003	4.84271	2.27582	2.801	1.846	6.438	3.695	0.260462	4.21667	Ssa11006231,Phosphoserine aminotransferase,Aminotran_5
Ssa06018482	32.416	25.829	27.086	28.4437	102.206	151.711	158.601	137.506	4.83433	2.27332	8.006	6.7	8.339	7.68167	0.270066	4.16193	Ssa06018482,-,-
Ssa13008947	14.507	10.63	10.539	11.892	36.783	30.004	105.522	57.4363	4.82983	2.27197	24.673	12.944	12.305	16.6407	1.39932	1.78725	Ssa13008947,-,-
Ssa09024879	6.499	2.756	2.803	4.01933	20.645	18.889	18.572	19.3687	4.81888	2.2687	6.911	7.814	5.21	6.645	1.65326	1.54338	Ssa09024879,Phosphoinositide phospholipase C,"C2,EF-hand_like,PI-PLC-X,PI-PLC-Y"
Ssa02009866	38.192	20.324	22.959	27.1583	73.449	166.025	152.509	130.661	4.81108	2.26636	725.013	943.211	664.135	777.453	28.6267	-2.57293	Ssa02009866,-,-
Ssa02010401	0	0.046	0	0.0153333	0	0.221	0	0.0736667	4.80435	2.26434	0	0	0	0	0	#DIV/0!	Ssa02010401,Belongs to the peroxidase family. Classical plant (class III) peroxidase subfamily,peroxidase
Ssa12006676	9.156	3.289	7.169	6.538	22.493	53.105	18.622	31.4067	4.80371	2.26415	131.957	149.501	121.803	134.42	20.5599	-2.09761	Ssa12006676,pyridoxal biosynthesis protein,SNO
Ssa06018758	0.235	0.531	0.538	0.434667	1.674	2.126	2.461	2.087	4.80138	2.26345	9.123	9.035	11.899	10.019	23.0498	-2.26324	Ssa06018758,amino acid transporter,Aa_trans
Ssa06019415	3.565	2.44	1.711	2.572	14.537	8.206	14.281	12.3413	4.79834	2.26254	43.116	45.825	50.639	46.5267	18.0897	-1.91456	Ssa06019415,plastid-lipid-associated protein 4,PAP_fibrillin
Ssa05015930	0.728	1.214	0.549	0.830333	4.162	1.035	6.753	3.98333	4.79727	2.26221	11.166	8.738	11.08	10.328	12.4384	-1.37451	Ssa05015930,Pentatricopeptide repeat-containing protein,"PPR,PPR_1,PPR_2,PPR_3"
Ssa11004971	84.313	38.699	49.247	57.4197	80.284	636.377	109.407	275.356	4.7955	2.26168	0	0	0	0	0	#DIV/0!	Ssa11004971,short-chain dehydrogenase reductase,"adh_short,adh_short_C2"
Ssa09025085	0.27	0	0	0.09	0.374	0.488	0.432	0.431333	4.79259	2.26081	0	0.211	0	0.0703333	0.781481	2.61652	Ssa09025085,ATP synthase delta chain,OSCP
Ssa03013492	0.251	0.284	0	0.178333	0.233	0.114	2.217	0.854667	4.79252	2.26079	0	0	0	0	0	#DIV/0!	Ssa03013492,Belongs to the SKP1 family,"Skp1,Skp1_POZ"
Ssa08022439	0.084	0.063	0.296	0.147667	0.039	0.152	1.93	0.707	4.78781	2.25937	0	0.131	0	0.0436667	0.295711	4.01711	Ssa08022439,Zinc finger BED domain-containing protein,"DUF4413,Dimer_Tnp_hAT,zf-BED"
Ssa05016182	0	0.014	0	0.00466667	0.017	0.05	0	0.0223333	4.78571	2.25873	0.231	0	0.014	0.0816667	17.5	-1.87055	Ssa05016182,Pentatricopeptide repeat-containing protein,"PPR,PPR_1,PPR_2,PPR_3"
Ssa01002682	26.18	29.828	33.489	29.8323	116.615	190.046	121.36	142.674	4.78252	2.25777	43.048	60.824	44.128	49.3333	1.65369	1.53208	Ssa01002682,cyclin-dependent protein kinase inhibitor,-
Ssa07021814	25.652	15.724	34.326	25.234	168.633	128.129	65.006	120.589	4.77884	2.25666	26.975	27.092	21.852	25.3063	1.00287	2.25253	Ssa07021814,UDP-glycosyltransferase 76F1-like,UDPGT
Ssa04014506	81.181	59.411	54.333	64.975	257.728	224.386	448.624	310.246	4.77485	2.25546	92.271	81.427	86.734	86.8107	1.33606	1.83747	Ssa04014506,expressed protein,-
Ssa03013577	21.295	13.829	18.149	17.7577	62.598	98.464	93.28	84.7807	4.77431	2.25529	61.539	68.628	55.872	62.013	3.49218	0.451165	Ssa03013577,-,-
Ssa11005230	15.014	11.178	7.05	11.0807	47.044	44.017	67.587	52.8827	4.77252	2.25475	0.372	0.264	0.195	0.277	0.0249985	7.57677	Ssa11005230,RING-H2 finger protein,GUB_WAK_bind
Ssa10004353	11.128	11.373	6.728	9.743	46.227	29.328	63.897	46.484	4.77102	2.2543	41.433	41.049	47.805	43.429	4.45746	0.0980755	Ssa10004353,domain in TBC and LysM domain containing proteins,TLD
Ssa09024067	8.915	7.502	8.305	8.24067	41.857	39.881	36.209	39.3157	4.77093	2.25427	13.043	13.043	14.4	13.4953	1.63765	1.54264	Ssa09024067,"SANT SWI3, ADA2, N-CoR and TFIIIB'' DNA-binding domains","Myb_DNA-bind_6,Myb_DNA-binding"
Ssa08021867	1.929	4.43	3.606	3.32167	26.563	13.696	7.213	15.824	4.76387	2.25214	2.73	3.542	4.652	3.64133	1.09624	2.11958	Ssa08021867,Aspartate aminotransferase,Aminotran_1_2
Ssa08023088	0.238	0.179	0.629	0.348667	1.543	2.802	0.637	1.66067	4.76291	2.25184	0.876	0.559	1.287	0.907333	2.60229	0.872058	Ssa08023088,-,-
Ssa11005571	0.165	0.083	0.242	0.163333	1.198	0.399	0.736	0.777667	4.76122	2.25133	0	0	1.573	0.524333	3.2102	0.568668	Ssa11005571,Adenylate isopentenyltransferase-like,IPPT
Ssa02009565	0.131	0.074	0.173	0.126	0.197	1.602	0	0.599667	4.75926	2.25074	0	0	0	0	0	#DIV/0!	Ssa02009565,S-type anion channel,SLAC1
Ssa06019502	0	0.224	0.261	0.161667	0.55	0.806	0.952	0.769333	4.75876	2.25059	0	0	0	0	0	#DIV/0!	Ssa06019502,-,-
Ssa01001175	0.328	0.035	0.041	0.134667	0.043	0.551	1.328	0.640667	4.75743	2.25018	0	0	0	0	0	#DIV/0!	Ssa01001175,Embryonic protein DC-8-like,LEA_4
Ssa06019218	0.484	0.774	0.585	0.614333	2.377	0.602	5.781	2.92	4.75312	2.24887	5.956	4.346	2.1	4.134	6.72925	-0.50157	Ssa06019218,transcription factor,Myb_DNA-binding
Ssa11006000	0.079	0.118	0.069	0.0886667	0.618	0.142	0.504	0.421333	4.75188	2.2485	0.116	1.167	0.061	0.448	5.05263	-0.0885367	Ssa11006000,ZF-HD protein dimerisation region,ZF-HD_dimer
Ssa11004922	3.381	1.75	2.665	2.59867	8.339	13.441	15.201	12.327	4.74359	2.24598	1.501	1.706	0.761	1.32267	0.508979	3.2203	Ssa11004922,Protein SHI RELATED SEQUENCE,DUF702
Ssa02009498	3.122	3.918	3.733	3.591	15.107	27.227	8.768	17.034	4.74353	2.24596	0.765	0.563	0.371	0.566333	0.157709	4.91062	Ssa02009498,Belongs to the sterol desaturase family,FA_hydroxylase
Ssa03012432	1.496	0.676	1.843	1.33833	3.356	12.245	3.397	6.33267	4.73176	2.24238	0	0	0	0	0	#DIV/0!	Ssa03012432,Reticulon-like protein,Reticulon
Ssa08022976	0.171	0.086	0.1	0.119	0.819	0.413	0.457	0.563	4.73109	2.24217	0	0	0	0	0	#DIV/0!	Ssa08022976,transcription factor,Myb_DNA-binding
Ssa06018042	52.317	36.659	60.054	49.6767	193.421	285.909	225.524	234.951	4.72961	2.24172	186.818	216.637	319.234	240.896	4.84929	-0.0360505	Ssa06018042,Axoneme-associated protein mst101(2)-like,HMA
Ssa02011763	0	0.561	0.656	0.405667	3.16	1.798	0.796	1.918	4.72802	2.24124	0	0	0	0	0	#DIV/0!	Ssa02011763,Protein LIGHT-DEPENDENT SHORT HYPOCOTYLS,DUF640
Ssa09024624	1.343	0.674	0.394	0.803667	3.394	3.319	4.686	3.79967	4.72791	2.2412	207.315	267.961	439.073	304.783	379.241	-6.32577	Ssa09024624,NAD(P)H-quinone oxidoreductase subunit N,NdhN
Ssa01002213	0.307	0.198	0.231	0.245333	2.572	0.436	0.468	1.15867	4.72283	2.23965	0	0	0.101	0.0336667	0.137228	5.105	Ssa01002213,UDP-Glycosyltransferase,UDPGT
Ssa09025006	208.615	111.339	290.627	203.527	553.104	1490.73	836.214	960.016	4.7169	2.23784	72.564	82.431	76.925	77.3067	0.379835	3.63439	Ssa09025006,fructose-bisphosphate aldolase,Glycolytic
Ssa03013715	0.503	2.769	1.991	1.75433	17.097	6.255	1.461	8.271	4.71461	2.23714	0.046	0	0.073	0.0396667	0.0226107	7.70399	Ssa03013715,Alpha/beta hydrolase family,Abhydrolase_6
Ssa05016777	9.22	7.691	14.239	10.3833	22.731	102.585	21.402	48.906	4.71005	2.23574	14.043	13.889	11.773	13.235	1.27464	1.88565	Ssa05016777,-,-
Ssa06019241	8.784	4.604	7.842	7.07667	46.18	35.011	18.77	33.3203	4.70848	2.23526	0.222	0.067	0.133	0.140667	0.0198775	7.88798	Ssa06019241,LL-diaminopimelate aminotransferase,Aminotran_1_2
Ssa06017807	0.182	0.046	0.214	0.147333	0.169	1.1	0.812	0.693667	4.70814	2.23516	0.224	0.57	0.469	0.421	2.85747	0.720422	Ssa06017807,Adenylate isopentenyltransferase 3,IPPT
Ssa02009889	0.662	0.117	0.069	0.282667	0.649	0.74	2.602	1.33033	4.70637	2.23461	0.286	0.152	0.511	0.316333	1.1191	2.07227	Ssa02009889,Cytochrome p450,p450
Ssa08023784	0.753	0.627	0.488	0.622667	1.723	5.88	1.186	2.92967	4.70503	2.2342	31.532	32.739	17.805	27.3587	43.9379	-3.22319	Ssa08023784,phosphatase 2c,PP2C
Ssa12006992	0.071	0.214	0.187	0.157333	0.951	1.155	0.114	0.74	4.70339	2.2337	0	0	0	0	0	#DIV/0!	Ssa12006992,-,-
Ssa03013558	0.131	0.147	0.287	0.188333	1.268	0.413	0.976	0.885667	4.70265	2.23348	0.528	0.765	1.713	1.002	5.32035	-0.178047	Ssa03013558,Quinone oxidoreductase-like protein,"ADH_N,ADH_zinc_N_2"
Ssa02010961	0	0	0.03	0.01	0.016	0.125	0	0.047	4.7	2.23266	0	0	0	0	0	#DIV/0!	Ssa02010961,"(E,E)-alpha-farnesene","Terpene_synth,Terpene_synth_C"
Ssa05015909	0.034	0.026	0	0.02	0.048	0.124	0.11	0.094	4.7	2.23266	33.42	28.265	19.559	27.0813	1354.07	-8.17042	Ssa05015909,cationic amino acid transporter,"AA_permease_2,AA_permease_C"
Ssa02011640	10.293	3.976	5.433	6.56733	23.345	46.465	22.759	30.8563	4.69846	2.23219	3.355	3.916	4.075	3.782	0.575881	3.02835	Ssa02011640,VQ motif,VQ
Ssa08021978	10.293	3.841	5.591	6.575	23.18	46.627	22.807	30.8713	4.69526	2.2312	3.487	3.986	4.075	3.84933	0.58545	3.00359	Ssa08021978,VQ motif,VQ
Ssa06019393	11.609	8.448	7.379	9.14533	48.782	37.577	42.402	42.9203	4.69314	2.23055	2.45	2.734	2.915	2.69967	0.295196	3.99081	Ssa06019393,Belongs to the protein kinase superfamily,Pkinase
Ssa11006042	1.011	2.696	1.372	1.693	9.774	10.848	3.204	7.942	4.69108	2.22992	0	0	0	0	0	#DIV/0!	Ssa11006042,Nodulation receptor kinase-like,"LRRNT_2,LRR_8,Malectin_like,Pkinase,Pkinase_Tyr"
Ssa07021229	20.394	13.897	20.903	18.398	30.795	93.332	134.548	86.225	4.68665	2.22856	487.606	577.754	327.904	464.421	25.243	-2.42926	Ssa07021229,-,-
Ssa01001681	11.96	13.092	4.775	9.94233	40.913	19.919	78.642	46.4913	4.6761	2.22531	37.609	38.778	59.445	45.2773	4.55399	0.0381728	Ssa01001681,zinc finger CCCH domain-containing protein,zf-CCCH
Ssa07021768	1.549	0.628	1.153	1.11	5.235	7.975	2.355	5.18833	4.67417	2.22471	0	0	0	0	0	#DIV/0!	Ssa07021768,LOB domain-containing protein,LOB
Ssa09025016	1.549	3.43	2.832	2.60367	6.544	13.182	16.756	12.1607	4.67059	2.22361	1.897	1.661	2.812	2.12333	0.815517	2.51782	Ssa09025016,Two-component response regulator-like,"CCT,Response_reg"
Ssa06017647	27.166	29.721	51.972	36.2863	164.297	238.319	105.797	169.471	4.67038	2.22354	8.98	9.366	12.487	10.2777	0.283238	4.04345	Ssa06017647,"Hydrolyzes acetyl esters in homogalacturonan regions of pectin. In type I primary cell wall, galacturonic acid residues of pectin can be acetylated at the O-2 and O-3 positions. Decreasing the degree of acetylation of pectin gels in vitro alters their physical properties",PAE
Ssa04015090	30.6	17.28	21.588	23.156	61.88	212.526	49.888	108.098	4.66825	2.22288	18.25	17.93	22.611	19.597	0.846303	2.46364	Ssa04015090,-,-
Ssa12007025	83.669	49.892	62.002	65.1877	274.889	405.535	231.43	303.951	4.66271	2.22117	1109.78	1425.62	1048.24	1194.55	18.3248	-1.97455	Ssa12007025,-,-
Ssa01002304	2.315	6.153	5.272	4.58	24.17	31.132	8.748	21.35	4.66157	2.22082	2.553	2.421	1.445	2.13967	0.467176	3.31878	Ssa01002304,Serine threonine-protein kinase,Pkinase
Ssa02010447	0.049	0.037	0.086	0.0573333	0.113	0.662	0.026	0.267	4.65698	2.21939	0	0	0	0	0	#DIV/0!	Ssa02010447,f-box protein,Chloroplast_duf
Ssa02010225	52.371	44.595	36.884	44.6167	189.64	147.335	286.133	207.703	4.65527	2.21887	34.487	33.378	42.572	36.8123	0.82508	2.49626	Ssa02010225,"Catalyzes the oxidation of uric acid to 5- hydroxyisourate, which is further processed to form (S)-allantoin",Uricase
Ssa13009157	0	0.038	0.135	0.0576667	0.331	0.092	0.382	0.268333	4.65318	2.21822	0.113	0.2	0	0.104333	1.80925	1.36283	Ssa13009157,-,-
Ssa06019311	0.58	3.242	2.149	1.99033	7.258	2.884	17.629	9.257	4.65098	2.21753	3.074	3.138	2.62	2.944	1.47915	1.65277	Ssa06019311,Belongs to the UDP-glycosyltransferase family,UDPGT
Ssa05016874	6.426	3.616	1.845	3.96233	21.898	21.229	12.142	18.423	4.64953	2.21709	0.696	1.216	0.157	0.689667	0.174056	4.73946	Ssa05016874,ubiquitin-protein transferase activity,Usp
Ssa08022108	0.155	0.351	0.41	0.305333	2.011	2.247	0	1.41933	4.64847	2.21676	0	0	0	0	0	#DIV/0!	Ssa08022108,glutathione S-transferase,"GST_C,GST_C_2,GST_N,GST_N_3"
Ssa09025291	5.08	1.201	10.393	5.558	15.352	52.62	9.529	25.8337	4.64801	2.21661	0.564	0.831	1.96	1.11833	0.201211	4.52983	Ssa09025291,Belongs to the mitochondrial carrier (TC 2.A.29) family,Mito_carr
Ssa06018464	305.312	59.326	654.551	339.73	458.928	3815.55	462.561	1579.01	4.64785	2.21656	4.696	4.991	9.86	6.51567	0.019179	7.9209	Ssa06018464,-,-
Ssa13008604	0.503	2.793	2.019	1.77167	17.068	6.17	1.461	8.233	4.64704	2.21631	0.046	0	0.073	0.0396667	0.0223895	7.69735	Ssa13008604,Alpha/beta hydrolase family,Abhydrolase_6
Ssa04015571	9.124	4.922	10.724	8.25667	15.84	72.24	26.882	38.3207	4.64118	2.21449	18.02	18.727	22.543	19.7633	2.39362	0.955296	Ssa04015571,Protein FLUORESCENT IN BLUE LIGHT,TPR_12
Ssa03013930	2.987	2.205	1.855	2.349	10.048	13.982	8.634	10.888	4.63516	2.21262	0	0.229	0.136	0.121667	0.0517951	6.48366	Ssa03013930,strictosidine,Str_synth
Ssa05015861	0.125	0.188	0.082	0.131667	0.925	0.452	0.451	0.609333	4.62785	2.21034	0.023	0.073	0.048	0.048	0.364557	3.66613	Ssa05015861,At4g19900-like,"Gb3_synth,Gly_transf_sug"
Ssa06019261	0.082	0.031	0.073	0.062	0.153	0.597	0.11	0.286667	4.62366	2.20903	0.061	0.064	0.064	0.063	1.01613	2.18595	Ssa06019261,-,-
Ssa01001408	1.469	2.715	2.996	2.39333	13.771	8.393	11.02	11.0613	4.62173	2.20843	0	0	0.052	0.0173333	0.00724234	9.31776	Ssa01001408,NAC domain-containing protein,NAM
Ssa01000496	1.029	1.48	1.729	1.41267	2.943	14.559	2.05	6.51733	4.6135	2.20586	0.069	0	0	0.023	0.0162813	8.1465	Ssa01000496,Germin-like protein subfamily 1 member,Cupin_1
Ssa06018839	2.534	1.796	1.574	1.968	5.17	3.438	18.593	9.067	4.60722	2.2039	0	0	0	0	0	#DIV/0!	Ssa06018839,Myb-related protein,Myb_DNA-binding
Ssa05017267	8.568	3.837	4.04	5.48167	10.696	19.601	45.442	25.2463	4.60559	2.20339	1.358	2.231	1.685	1.758	0.320705	3.84407	Ssa05017267,Transcription factor,HLH
Ssa10004190	56.444	42.356	124.822	74.5407	103.53	754.947	170.375	342.951	4.60085	2.2019	50.504	50.235	59.818	53.519	0.717984	2.67988	Ssa10004190,Belongs to the short-chain dehydrogenases reductases (SDR) family,adh_short
Ssa01002005	1.518	0.714	1.503	1.245	6.89	3.347	6.945	5.72733	4.60027	2.20172	0	0	0	0	0	#DIV/0!	Ssa01002005,Soybean trypsin inhibitor (Kunitz) family of protease inhibitors,Kunitz_legume
Ssa06019024	0.611	0.496	0.993	0.7	0.5	6.973	2.185	3.21933	4.59905	2.20134	0	0.037	0	0.0123333	0.017619	8.02806	Ssa06019024,phospholipase,Lipase_3
Ssa11005778	0	0	6.011	2.00367	0.372	27.261	0	9.211	4.59707	2.20072	0	0	0	0	0	#DIV/0!	Ssa11005778,lipid-transfer protein,LTP_2
Ssa07020520	9.532	6.567	5.317	7.13867	34.199	18.481	45.726	32.802	4.59498	2.20006	2.244	2.385	1.586	2.07167	0.290204	3.98492	Ssa07020520,BTB POZ domain-containing protein,BTB
Ssa01000360	8.633	13.546	15.19	12.4563	73.23	68.81	29.396	57.1453	4.58765	2.19776	4.381	4.917	3.696	4.33133	0.347721	3.72175	Ssa01000360,Belongs to the glycosyltransferase 8 family,Glyco_transf_8
Ssa09024203	0.553	0.416	0.707	0.558667	1.661	3.907	2.12	2.56267	4.58711	2.19759	0.351	0.451	0.64	0.480667	0.860382	2.41454	Ssa09024203,Pentatricopeptide repeat-containing protein,"PPR,PPR_2"
Ssa05016678	1.381	0.52	0.374	0.758333	2.971	2.929	4.51	3.47	4.57582	2.19403	6.44	5.891	7.826	6.719	8.86022	-0.953311	Ssa05016678,-,-
Ssa05016286	4.807	1.989	2.091	2.96233	10.407	13.999	16.198	13.5347	4.56892	2.19185	0.893	1.568	1.916	1.459	0.492517	3.21361	Ssa05016286,-,-
Ssa07020108	7.473	3.376	4.132	4.99367	15.699	33.985	18.705	22.7963	4.56505	2.19063	40.335	51.71	57.336	49.7937	9.97136	-1.12716	Ssa07020108,-,-
Ssa07021807	1.956	1.031	1.319	1.43533	1.116	12.09	6.444	6.55	4.5634	2.19011	21.09	24.861	19.171	21.7073	15.1235	-1.72862	Ssa07021807,"HAD superfamily, subfamily IIIB (Acid phosphatase)",Acid_phosphat_B
Ssa09024550	20.679	9.783	11.431	13.9643	52.473	92.19	46.142	63.6017	4.55458	2.18732	4.977	5.147	5.084	5.06933	0.36302	3.6492	Ssa09024550,-,-
Ssa13008737	22.626	14.03	19.32	18.6587	63.829	97.381	93.707	84.9723	4.55404	2.18715	63.006	55.423	49.607	56.012	3.00193	0.601257	Ssa13008737,-,-
Ssa04014283	4.468	12.215	4.871	7.18467	50.584	38.92	8.51	32.6713	4.54737	2.18503	0.357	0.304	0.75	0.470333	0.0654635	6.1182	Ssa04014283,LURP-one-related,LOR
Ssa05016637	3.556	5.801	1.521	3.626	15.6	15.5	18.363	16.4877	4.54707	2.18494	1.997	1.543	1.601	1.71367	0.472605	3.26623	Ssa05016637,Myb-like DNA-binding domain,Myb_DNA-binding
Ssa01001170	25.91	12.391	78.745	39.0153	67.644	361.691	102.765	177.367	4.54608	2.18462	0.411	0.94	0.133	0.494667	0.0126788	8.48606	Ssa01001170,Myb/SANT-like DNA-binding domain,Myb_DNA-bind_4
Ssa02010419	1.195	0.675	0.894	0.921333	1.271	7.134	4.15	4.185	4.54233	2.18343	25.389	32.307	23.241	26.979	29.2826	-2.68854	Ssa02010419,-,-
Ssa04015541	1.053	0.233	0.381	0.555667	4.353	2.352	0.86	2.52167	4.53809	2.18209	0.592	0.822	0.526	0.646667	1.16377	1.96328	Ssa04015541,"SANT SWI3, ADA2, N-CoR and TFIIIB'' DNA-binding domains",Myb_DNA-binding
Ssa08023334	3.644	2.572	5.209	3.80833	16.746	24.922	10.097	17.255	4.53085	2.17978	0.837	1.957	2.988	1.92733	0.506083	3.16234	Ssa08023334,Transcription factor PRE6-like,HLH
Ssa13008979	4.14	3.73	5.314	4.39467	5.65	16.389	37.633	19.8907	4.52609	2.17827	0.349	0.53	0.157	0.345333	0.0785801	5.84796	Ssa13008979,B3 domain-containing protein,B3
Ssa13009276	0.389	0.146	0.085	0.206667	0.854	0.966	0.986	0.935333	4.52581	2.17817	0.071	0	0.3	0.123667	0.598387	2.91902	Ssa13009276,"DNA-directed RNA polymerases I, II, and III subunit","RNA_pol_Rpb5_C,RNA_pol_Rpb5_N"
Ssa10003548	436.945	236.308	328.947	334.067	547.362	3155.83	829.058	1510.75	4.5223	2.17706	14.299	7.14	14.709	12.0493	0.0360686	6.97017	Ssa10003548,Major allergen Pru,Bet_v_1
Ssa08023621	0	0	0.135	0.045	0.283	0	0.327	0.203333	4.51852	2.17585	0	0.12	0	0.04	0.888889	2.34577	Ssa08023621,-,-
Ssa05016136	0.915	2.274	4.267	2.48533	4.02	26.482	3.177	11.2263	4.51703	2.17538	0	0	0	0	0	#DIV/0!	Ssa05016136,Belongs to the protein kinase superfamily. Ser Thr protein kinase family,"LRRNT_2,LRR_1,LRR_8,Pkinase,Pkinase_Tyr"
Ssa13008877	6.622	1.781	3.329	3.91067	3.208	36.29	13.476	17.658	4.51534	2.17484	0.522	0	0.548	0.356667	0.0912035	5.6296	Ssa13008877,Thaumatin-like protein,Thaumatin
Ssa02010479	6.415	7.842	9.016	7.75767	31.173	51.166	22.699	35.0127	4.5133	2.17418	13.413	14.777	10.545	12.9117	1.66438	1.4392	Ssa02010479,May be involved in the degradation of misfolded endoplasmic reticulum (ER) luminal proteins,DER1
Ssa01000534	12.371	10.277	16.185	12.9443	66.965	72.333	35.944	58.414	4.51271	2.17399	1.778	1.569	0.845	1.39733	0.107949	5.38557	Ssa01000534,E3 ubiquitin-protein ligase,"Copine,zf-C3HC4_3"
Ssa06019745	1.662	2.456	2.31	2.14267	6.3	6.55	16.155	9.66833	4.51229	2.17386	0.468	0.497	0.285	0.416667	0.194462	4.5363	Ssa06019745,Copper-transporting ATPase,"E1-E2_ATPase,HMA,Hydrolase"
Ssa01000707	1.469	0.527	1.108	1.03467	6.858	2.214	4.933	4.66833	4.51192	2.17374	0	0	0	0	0	#DIV/0!	Ssa01000707,transcription repressor,Myb_DNA-binding
Ssa08022356	122.615	63.274	77.115	87.668	192.255	347.193	644.77	394.739	4.50266	2.17078	43.162	42.482	71.827	52.4903	0.59874	2.91078	Ssa08022356,Protein EARLY RESPONSIVE TO DEHYDRATION 15-like,PAM2
Ssa11006122	0.961	1.302	1.296	1.18633	3.821	3.476	8.725	5.34067	4.50183	2.17051	2.354	2.002	2.471	2.27567	1.91824	1.23073	Ssa11006122,Growth-regulating factor,"QLQ,WRC"
Ssa11005431	38.279	17.929	59.401	38.5363	93.813	350.573	75.677	173.354	4.49846	2.16943	10.192	14.6	20.004	14.932	0.387478	3.53724	Ssa11005431,Cox19-like CHCH family protein,-
Ssa02011824	41.569	20.649	38.604	33.6073	80.638	74.932	297.937	151.169	4.4981	2.16931	19.311	24.809	48.787	30.969	0.921495	2.28727	Ssa02011824,-,-
Ssa09025959	0.098	0.073	0	0.057	0.135	0.53	0.104	0.256333	4.49708	2.16899	1481.56	1329.41	1588.16	1466.38	25725.9	-12.4819	Ssa09025959,Ganglioside-induced differentiation-associated protein,CRAL_TRIO_2
Ssa04015549	3.785	4.936	5.564	4.76167	14.539	35.53	14.13	21.3997	4.49415	2.16805	6.549	6.384	14.107	9.01333	1.89289	1.24746	Ssa04015549,Belongs to the protein kinase superfamily,"Pkinase,Pkinase_Tyr"
Ssa08022370	1.09	0.884	0.811	0.928333	2.791	4.549	5.15	4.16333	4.48474	2.16502	87.535	93.722	69.769	83.6753	90.135	-4.32899	Ssa08022370,-,-
Ssa04014832	3.699	60.451	35.097	33.0823	285.524	17.543	142.017	148.361	4.48461	2.16498	5.659	9.764	3.241	6.22133	0.188056	4.57575	Ssa04014832,-,-
Ssa05017172	4.283	9.755	9.032	7.69	31.04	40.949	31.467	34.4853	4.48444	2.16493	66.46	57.001	37.097	53.5193	6.9596	-0.634077	Ssa05017172,carboxylase beta chain,Carboxyl_trans
Ssa02010593	2.247	1.774	1.977	1.99933	9.656	13.63	3.572	8.95267	4.47783	2.1628	0	0.086	0.042	0.0426667	0.0213404	7.71306	Ssa02010593,Belongs to the cyclin family,"Cyclin_C,Cyclin_N"
Ssa09024729	14.258	2.013	5.488	7.253	14.424	62.06	20.946	32.4767	4.47769	2.16275	6.551	6.266	8.252	7.023	0.968289	2.20924	Ssa09024729,-,-
Ssa09025035	9.292	28.328	38.95	25.5233	93.273	50.339	199.175	114.262	4.47678	2.16246	47.745	58.36	28.962	45.0223	1.76397	1.34364	Ssa09025035,Homeobox-leucine zipper protein,"HALZ,Homeobox"
Ssa07020666	0.364	0.183	0	0.182333	0.28	0.548	1.62	0.816	4.47532	2.16199	1634.69	1737.49	3682.33	2351.5	12896.7	-11.4927	Ssa07020666,Participates in electron transfer between P700 and the cytochrome b6-f complex in photosystem I,Copper-bind
Ssa13008883	11.929	4.938	6.997	7.95467	41.12	39.966	25.665	35.5837	4.47331	2.16134	0.06	0.032	0.063	0.0516667	0.00649514	9.42777	Ssa13008883,Belongs to the multi antimicrobial extrusion (MATE) (TC 2.A.66.1) family,MatE
Ssa06017507	1.86	0.525	2.148	1.511	9.945	7.814	2.504	6.75433	4.47011	2.16031	0.057	0	0.239	0.0986667	0.0652989	6.09711	Ssa06017507,"Bifunctional 3-dehydroquinate dehydratase shikimate dehydrogenase, chloroplastic-like","DHquinase_I,Shikimate_DH,Shikimate_dh_N"
Ssa05017107	0.131	0.542	0.461	0.378	1.817	1.184	2.064	1.68833	4.46649	2.15914	11.938	15.246	21.173	16.119	42.6429	-3.25509	Ssa05017107,"Zinc-binding domain present in Lin-11, Isl-1, Mec-3.",LIM
Ssa12007055	1.703	2.122	1.73	1.85167	10.792	4.272	9.747	8.27033	4.46643	2.15912	1.595	1.188	1.893	1.55867	0.841764	2.40763	Ssa12007055,Belongs to the protein kinase superfamily. Ser Thr protein kinase family,"LRRNT_2,LRR_1,LRR_6,LRR_8,Pkinase"
Ssa08023706	0.719	0.338	0.237	0.431333	2.162	2.846	0.768	1.92533	4.46368	2.15823	0.198	0	0	0.066	0.153014	4.8665	Ssa08023706,-,-
Ssa06018074	0.186	0.842	0.328	0.452	1.379	1.685	2.986	2.01667	4.46165	2.15758	2.465	1.892	3.307	2.55467	5.65192	-0.341162	Ssa06018074,-,-
Ssa07020517	0.641	0.723	0.282	0.548667	1.777	1.448	4.106	2.44367	4.45383	2.15505	8.946	8.257	1.73	6.311	11.5024	-1.36882	Ssa07020517,Belongs to the SNF7 family,Snf7
Ssa11005733	17.371	12.265	15.018	14.8847	48.757	77.791	71.988	66.1787	4.4461	2.15254	47.763	57.808	38.267	47.946	3.22117	0.464956	Ssa11005733,-,-
Ssa08023102	87.589	160.115	116.741	121.482	532.77	412.407	672.568	539.248	4.43893	2.15021	211.051	228.148	186.754	208.651	1.71755	1.36986	Ssa08023102,Homeobox protein knotted-1-like,"ELK,Homeobox_KN,KNOX1,KNOX2"
Ssa06018414	0.959	0.608	1.022	0.863	3.782	3.287	4.423	3.83067	4.43878	2.15016	1062.31	916.23	1635.45	1204.66	1395.9	-8.29682	Ssa06018414,Magnesium-protoporphyrin IX monomethyl ester oxidative cyclase,Rubrerythrin
Ssa05016535	0	0.099	0	0.033	0.061	0.238	0.14	0.146333	4.43434	2.14872	0	0	0.101	0.0336667	1.0202	2.11987	Ssa05016535,-,-
Ssa10004856	7.645	10.093	4.007	7.24833	12.774	33.985	49.601	32.12	4.43136	2.14775	0.981	0.407	0.276	0.554667	0.0765233	5.85571	Ssa10004856,ABC transporter B family member,"ABC_membrane,ABC_tran"
Ssa07020999	0.819	0.342	0.24	0.467	2.496	2.77	0.939	2.06833	4.42898	2.14697	0	0	0	0	0	#DIV/0!	Ssa07020999,inactive receptor kinase,"LRRNT_2,LRR_1,LRR_8,Pkinase,Pkinase_Tyr"
Ssa02011254	122.856	67.359	77.009	89.0747	192.311	347.411	642.58	394.101	4.42439	2.14548	42.807	42.482	77.037	54.1087	0.607453	2.86463	Ssa02011254,Protein EARLY RESPONSIVE TO DEHYDRATION 15-like,PAM2
Ssa03013316	23.726	2.181	3.038	9.64833	22.152	36.672	69.146	42.6567	4.42114	2.14442	4.422	5.396	6.189	5.33567	0.553014	2.99903	Ssa03013316,Domain of unknown function (DUF4228),DUF4228
Ssa02011668	12.017	10.977	10.09	11.028	42.147	27.696	76.383	48.742	4.41984	2.14399	104.436	86.119	23.584	71.3797	6.47258	-0.550348	Ssa02011668,NAC domain-containing protein,NAM
Ssa08023054	9.417	3.337	9.016	7.25667	24.594	53.858	17.755	32.069	4.41925	2.1438	0	0.216	0	0.072	0.00992191	8.79897	Ssa08023054,UPF0057 membrane protein,Pmp3
Ssa04015554	3.647	4.762	5.483	4.63067	12.831	34.737	13.785	20.451	4.41643	2.14288	5.226	6.312	13.822	8.45333	1.82551	1.27458	Ssa04015554,Belongs to the protein kinase superfamily,"Pkinase,Pkinase_Tyr"
Ssa03013435	6.701	1.781	3.468	3.98333	3.208	36.219	13.349	17.592	4.4164	2.14287	0.579	0	0.548	0.375667	0.0943096	5.54932	Ssa03013435,Thaumatin-like protein,Thaumatin
Ssa12007099	0.442	0.665	0.809	0.638667	2.178	3.295	2.988	2.82033	4.41597	2.14273	22.668	22.051	10.081	18.2667	28.6013	-2.69528	Ssa12007099,Protein of unknown function (DUF688),DUF688
Ssa07020348	5.405	4.591	4.185	4.727	24.297	21.861	16.4	20.8527	4.4114	2.14124	0.413	0.743	0.868	0.674667	0.142726	4.94991	Ssa07020348,tryptophan synthase,PALP
Ssa08021952	12.261	10.886	9.982	11.043	42.091	27.64	76.383	48.7047	4.41046	2.14093	104.749	86.167	23.678	71.5313	6.47753	-0.554515	Ssa08021952,NAC domain-containing protein,NAM
Ssa08023197	167.222	158.982	256.317	194.174	446.186	1785.76	335.075	855.673	4.40674	2.13971	3.946	4.575	4.017	4.17933	0.0215237	7.67764	Ssa08023197,-,-
Ssa08022587	39.035	29.004	108.194	58.7443	90.455	556.119	129.298	258.624	4.40254	2.13833	36.19	35.165	42.602	37.9857	0.646627	2.76733	Ssa08022587,Chaperone protein dnaJ 20,DnaJ
Ssa07020526	60.72	33.47	48.913	47.701	102.728	375.149	152.123	210	4.40242	2.1383	87.669	74.062	68.606	76.779	1.60959	1.45161	Ssa07020526,Chaperone protein DNAj,DnaJ
Ssa12006965	149.779	20.181	127.613	99.191	120.518	1049.9	138.848	436.423	4.39983	2.13745	6.126	5.631	5.736	5.831	0.0587856	6.22584	Ssa12006965,Encoded by,DUF3774
Ssa11005083	2.474	0.488	1.71	1.55733	7.327	8.789	4.436	6.85067	4.39897	2.13717	1.905	1.933	1.818	1.88533	1.21062	1.86142	Ssa11005083,-,-
Ssa04014962	9.714	3.511	5.128	6.11767	21.518	18.889	40.319	26.9087	4.39852	2.13702	14.21	13.357	14.917	14.1613	2.31483	0.926114	Ssa04014962,Tyrosine-protein phosphatase,Y_phosphatase2
Ssa03012498	2.337	1.354	1.107	1.59933	0.333	20.651	0.096	7.02667	4.3935	2.13537	0	0	0	0	0	#DIV/0!	Ssa03012498,-,-
Ssa02009745	63.894	21.302	13.037	32.7443	299.409	45.255	86.821	143.828	4.39246	2.13503	0	0.15	1.114	0.421333	0.0128674	8.41517	Ssa02009745,-,-
Ssa03014123	3.246	2.165	3.182	2.86433	9.071	11.659	16.993	12.5743	4.38997	2.13421	39.303	43.077	67.884	50.088	17.4868	-1.99398	Ssa03014123,Belongs to the peptidase S10 family,Peptidase_S10
Ssa02009537	0	0.3	0.175	0.158333	1.012	0.54	0.532	0.694667	4.38737	2.13336	1.17	0.311	0.154	0.545	3.44211	0.350065	Ssa02009537,-,-
Ssa06019303	37.603	14.299	17.275	23.059	76.428	78.625	148.401	101.151	4.38663	2.13311	34.483	41.021	36.283	37.2623	1.61596	1.44073	Ssa06019303,nitronate,NMO
Ssa10003545	260.052	195.219	238.44	231.237	429.872	1981.25	631.348	1014.16	4.38578	2.13283	11.036	5.202	11.485	9.241	0.0399633	6.77801	Ssa10003545,Major allergen Pru,Bet_v_1
Ssa10002945	1.395	1.576	1.496	1.489	5.667	4.851	9.062	6.52667	4.38325	2.132	86.04	88.414	86.084	86.846	58.3251	-3.73404	Ssa10002945,Belongs to the UDP-glycosyltransferase family,UDPGT
Ssa13009267	3.393	1.584	2.209	2.39533	7.345	13.074	11.022	10.4803	4.37531	2.12939	0.748	2.015	1.938	1.567	0.654189	2.74161	Ssa13009267,Trihelix transcription factor,Myb_DNA-bind_4
Ssa01002197	0.307	0.289	0.338	0.311333	1.633	0.069	2.378	1.36	4.36831	2.12707	2.314	2.279	2.133	2.242	7.20128	-0.72118	Ssa01002197,DNA RNA-binding protein,Kin17_mid
Ssa09024866	0.196	0.71	0.518	0.474667	1.725	2.45	2.035	2.07	4.36096	2.12464	0.231	0.245	1.424	0.633333	1.33427	1.70859	Ssa09024866,"zinc metalloprotease EGY2, chloroplastic",-
Ssa11005234	12.081	5.709	7.697	8.49567	18.264	39.109	53.766	37.0463	4.36062	2.12453	22.049	41.921	24.111	29.3603	3.45592	0.335462	Ssa11005234,Homeobox-leucine zipper protein,"HALZ,HD-ZIP_N,Homeobox"
Ssa09024159	5.512	2.046	1.571	3.043	8.653	18.748	12.401	13.2673	4.35995	2.12431	513.98	606.201	588.998	569.726	187.225	-5.42432	Ssa09024159,Oxygen-evolving enhancer protein 2,PsbP
Ssa08023748	11.687	6.503	12.778	10.3227	22.058	93.192	19.694	44.9813	4.35753	2.12351	1.2	1.209	1.592	1.33367	0.129198	5.07586	Ssa08023748,lanC-like protein GCL1,LANC_like
Ssa03013692	109.387	47.64	55.077	70.7013	332.174	318.761	273.19	308.042	4.35694	2.12332	37.257	51.26	54.499	47.672	0.674273	2.69191	Ssa03013692,Signal peptidase complex catalytic subunit,Peptidase_S24
Ssa07021367	0.373	0	0	0.124333	0.689	0.337	0.597	0.541	4.35121	2.12142	0	0.291	0.575	0.288667	2.32172	0.906224	Ssa07021367,-,-
Ssa01000307	9.276	10.251	19.941	13.156	28.921	112.509	30.05	57.16	4.34479	2.11929	0	0	0	0	0	#DIV/0!	Ssa01000307,short-chain dehydrogenase reductase,"adh_short,adh_short_C2"
Ssa13008300	0.663	0.552	0.399	0.538	1.437	3.19	2.369	2.332	4.33457	2.11589	0	0	0	0	0	#DIV/0!	Ssa13008300,"D-arabinono-1,4-lactone oxidase","ALO,FAD_binding_4"
Ssa08023157	1.614	1.094	1.562	1.42333	0.672	17.224	0.603	6.16633	4.33232	2.11514	0.119	0.252	0.374	0.248333	0.174473	4.63406	Ssa08023157,Plastocyanin-like domain,Cu_bind_like
Ssa02009656	0.205	0.154	0.144	0.167667	0.549	1.258	0.372	0.726333	4.33201	2.11504	0.03	0	0.063	0.031	0.184891	4.55029	Ssa02009656,Belongs to the multi antimicrobial extrusion (MATE) (TC 2.A.66.1) family,MatE
Ssa12007453	0.462	1.118	0.813	0.797667	4.304	2.209	3.844	3.45233	4.32804	2.11371	41.051	36.075	24.349	33.825	42.4049	-3.29245	Ssa12007453,Belongs to the GRAS family,GRAS
Ssa12007495	30.061	22.047	32.544	28.2173	113.702	117.756	134.048	121.835	4.31775	2.11028	51.155	59.936	53.627	54.906	1.94583	1.1499	Ssa12007495,Protein of unknown function (DUF1218),DUF1218
Ssa10004404	2.496	4.157	3.048	3.23367	19.284	8.658	13.929	13.957	4.31615	2.10975	6.584	4.955	5.778	5.77233	1.78507	1.27376	Ssa10004404,Universal stress protein family,"Pkinase,Usp"
Ssa02009872	2.019	11.665	7.066	6.91667	49.668	12.345	27.525	29.846	4.31508	2.10939	13.679	10.081	11.041	11.6003	1.67716	1.36337	Ssa02009872,Carbon catabolite repressor protein 4 homolog,Exo_endo_phos
Ssa01000767	3.716	3.881	3.902	3.833	15.549	14.689	19.369	16.5357	4.31403	2.10904	2.423	3.605	2.775	2.93433	0.765545	2.49448	Ssa01000767,Random slug protein 5-like,"CRAL_TRIO,CRAL_TRIO_N"
Ssa01000643	4.606	3.006	4.018	3.87667	19.65	19.683	10.806	16.713	4.31118	2.10808	8.549	10.226	12.796	10.5237	2.71462	0.667333	Ssa01000643,Transcription factor,HLH
Ssa13008627	109.387	48.563	55.273	71.0743	325.786	324.1	268.906	306.264	4.30907	2.10738	36.766	53.088	54.241	48.0317	0.675795	2.67272	Ssa13008627,Signal peptidase complex catalytic subunit,Peptidase_S24
Ssa10003784	16.659	15.644	15.439	15.914	46.291	65.939	93.492	68.574	4.30904	2.10737	232.295	264.768	147.191	214.751	13.4945	-1.64693	Ssa10003784,Homogentisate phytyltransferase 1,UbiA
Ssa04014798	14.607	11.064	16.468	14.0463	57.642	108.297	15.279	60.406	4.30048	2.1045	0	0.137	0	0.0456667	0.00325115	10.3693	Ssa04014798,ethylene-responsive transcription factor,AP2
Ssa08023221	0	0.227	0	0.0756667	0.976	0	0	0.325333	4.29956	2.10419	0	0	0	0	0	#DIV/0!	Ssa08023221,-,-
Ssa13009162	0	0.514	0.15	0.221333	2.054	0.618	0.182	0.951333	4.29819	2.10373	1.004	0.667	0.527	0.732667	3.31024	0.376794	Ssa13009162,Plant non-specific lipid-transfer proteins transfer phospholipids as well as galactolipids across membranes. May play a role in wax or cutin deposition in the cell walls of expanding epidermal cells and certain secretory tissues,"LTP_2,Tryp_alpha_amyl"
Ssa06018343	0.325	0.122	0.429	0.292	3.31	0.368	0.087	1.255	4.29795	2.10365	0.658	0.635	0.565	0.619333	2.121	1.0189	Ssa06018343,f-box protein,"F-box,F-box-like"
Ssa11005797	20.496	20.21	4.894	15.2	74.974	56.142	64.808	65.308	4.29658	2.10319	46.563	71.297	63.418	60.426	3.97539	0.11209	Ssa11005797,membrane-associated kinase regulator,-
Ssa08022095	0.549	0.413	1.932	0.964667	1.1	9.434	1.857	4.13033	4.28162	2.09816	3.094	3.574	1.695	2.78767	2.88977	0.5672	Ssa08022095,VQ motif,VQ
Ssa05016979	6.388	9.274	10.836	8.83267	35.263	46.245	31.903	37.8037	4.27998	2.09761	2.775	2.628	3.548	2.98367	0.337799	3.66337	Ssa05016979,lysine-specific demethylase,"JmjC,zf-4CXXC_R1"
Ssa11005270	0.291	0.438	2.561	1.09667	0.054	14.008	0	4.68733	4.27416	2.09564	0	0	0	0	0	#DIV/0!	Ssa11005270,Belongs to the LDH MDH superfamily,"Ldh_1_C,Ldh_1_N"
Ssa06019429	1.609	1.211	1.278	1.366	4.895	4.083	8.51	5.82933	4.26745	2.09337	1.259	0.892	0.841	0.997333	0.730112	2.54718	Ssa06019429,-,-
Ssa09024163	0.188	0.17	0.132	0.163333	0.747	0.781	0.561	0.696333	4.26327	2.09196	29.112	19.855	19.119	22.6953	138.951	-5.02647	Ssa09024163,transcription factor,HLH
Ssa07021695	1.032	0.222	0.908	0.720667	3.41	3.601	2.206	3.07233	4.26318	2.09193	0	0	0	0	0	#DIV/0!	Ssa07021695,Heavy-metal-associated domain,HMA
Ssa09024711	1.716	1.428	2.542	1.89533	7.976	9.309	6.946	8.077	4.26152	2.09137	0.73	1.129	1.185	1.01467	0.53535	2.99281	Ssa09024711,-,-
Ssa11005215	13.127	21.675	20.261	18.3543	70.488	45.718	118.164	78.1233	4.2564	2.08963	46.103	41.833	38.357	42.0977	2.29361	0.892013	Ssa11005215,GATA transcription factor,"ASXH,GATA,RPN13_C"
Ssa09025086	18.362	11.797	15.266	15.1417	45.005	79.482	68.844	64.4437	4.25605	2.08951	137.458	135.345	110.415	127.739	8.43628	-0.987092	Ssa09025086,Belongs to the iron ascorbate-dependent oxidoreductase family,"2OG-FeII_Oxy,DIOX_N"
Ssa01002839	40.233	26.521	43.545	36.7663	72.777	332.847	63.788	156.471	4.25581	2.08944	7.757	8.896	13.005	9.886	0.268887	3.98436	Ssa01002839,Belongs to the tetraspanin (TM4SF) family,Tetraspannin
Ssa09025221	0.209	0.276	0.138	0.207667	0.605	1.04	1.006	0.883667	4.25522	2.08923	18.257	20.017	25.944	21.406	103.079	-4.59837	Ssa09025221,-,DUF4378
Ssa09024347	0.217	0.621	0.344	0.394	1.948	0.314	2.76	1.674	4.24873	2.08703	4.341	5.259	5.797	5.13233	13.0262	-1.61632	Ssa09024347,Belongs to the UDP-glycosyltransferase family,UDPGT
Ssa05017058	4.549	2.441	2.438	3.14267	8.681	14.281	17.066	13.3427	4.24565	2.08599	5.112	4.779	7.182	5.691	1.81088	1.22929	Ssa05017058,"pyruvate, phosphate dikinase regulatory protein",Kinase-PPPase
Ssa06018636	17.275	15.212	12.172	14.8863	54.504	71.369	63.661	63.178	4.24403	2.08543	24.752	30.94	14.8	23.4973	1.57845	1.42693	Ssa06018636,Cystinosin homolog,PQ-loop
Ssa04015489	0.45	0.339	0.176	0.321667	0.532	0.543	3.018	1.36433	4.24145	2.08456	0.037	0.078	0.154	0.0896667	0.278756	3.92748	Ssa04015489,Belongs to the DEAD box helicase family,"DEAD,Helicase_C"
Ssa09024583	3.565	2.237	3.136	2.97933	9.342	12.358	16.186	12.6287	4.23876	2.08364	8.734	6.962	8.023	7.90633	2.65373	0.675622	Ssa09024583,-,-
Ssa01002198	3.831	1.154	2.359	2.448	5.581	13.86	11.665	10.3687	4.23557	2.08255	3.661	6.286	5.322	5.08967	2.07911	1.02659	Ssa01002198,DNA RNA-binding protein,Kin17_mid
Ssa04014881	0.136	0.102	0.239	0.159	0.251	0.246	1.523	0.673333	4.2348	2.08229	0.698	0.106	0.943	0.582333	3.66247	0.209476	Ssa04014881,Uric acid degradation bifunctional protein,"OHCU_decarbox,Transthyretin"
Ssa10003938	0.87	0.748	0.51	0.709333	3.428	2.884	2.699	3.00367	4.23449	2.08219	3.713	3.3	2.716	3.243	4.5719	-0.110604	Ssa10003938,TBC1 domain family member,RabGAP-TBC
Ssa05017259	14.024	8.997	10.732	11.251	32.102	55.387	55.432	47.6403	4.23432	2.08213	38.338	30.665	27.151	32.0513	2.84875	0.571799	Ssa05017259,BTB POZ domain-containing protein,-
Ssa01002660	0.492	1.235	1.082	0.936333	3.829	2.447	5.606	3.96067	4.22998	2.08065	4.339	5.765	4.745	4.94967	5.28622	-0.321588	Ssa01002660,BLOC-1-related complex sub-unit 8,BORCS8
Ssa05016977	1.528	1.301	1.286	1.37167	5.961	6.76	4.685	5.802	4.22989	2.08062	0.293	0.234	0.436	0.321	0.234022	4.17591	Ssa05016977,Chitin elicitor receptor kinase 1-like,"LysM,Pkinase,Pkinase_Tyr"
Ssa02011518	0.549	0.413	1.932	0.964667	1.1	9.269	1.857	4.07533	4.2246	2.07882	2.96	3.574	1.695	2.743	2.84347	0.571163	Ssa02011518,VQ motif,VQ
Ssa06019683	1.91	2.705	1.864	2.15967	7.789	13.26	6.279	9.10933	4.21793	2.07654	33.217	28.733	29.935	30.6283	14.182	-1.74945	Ssa06019683,E3 ubiquitin-protein ligase,-
Ssa07019881	0.864	0.65	0.276	0.596667	2.724	2.557	2.265	2.51533	4.21564	2.07575	0.058	0.061	0.061	0.06	0.100559	5.38964	Ssa07019881,Secoisolariciresinol dehydrogenase-like,adh_short_C2
Ssa04015545	12.389	7.476	9.297	9.72067	53.672	32.873	36.302	40.949	4.21257	2.0747	3.348	2.704	3.093	3.04833	0.313593	3.74774	Ssa04015545,transcription factor,Myb_DNA-binding
Ssa02010764	87.053	59.55	67.327	71.31	217.886	356.49	326.448	300.275	4.21084	2.07411	46.715	50.781	61.591	53.029	0.74364	2.50143	Ssa02010764,Belongs to the peptidase C1 family,"Inhibitor_I29,Peptidase_C1"
Ssa01002668	0	0.05	0	0.0166667	0.122	0	0.088	0.07	4.2	2.07039	3.494	2.579	1.987	2.68667	161.2	-5.26232	Ssa01002668,Nodulin-like,"MFS_1,Nodulin-like"
Ssa09025572	6.153	10.857	9.132	8.714	36.484	39.191	34.057	36.5773	4.19754	2.06954	48.863	47.863	97.989	64.905	7.44836	-0.82738	Ssa09025572,Belongs to the glutamyl-tRNA reductase family,"GlutR_N,GlutR_dimer,Shikimate_DH"
Ssa09023983	1.662	1.668	4.549	2.62633	14.133	11.189	7.743	11.0217	4.1966	2.06922	1.968	1.515	1.14	1.541	0.58675	2.8384	Ssa09023983,Tyrosine-protein phosphatase,Y_phosphatase2
Ssa10004705	18.287	9.796	11.122	13.0683	66.807	75.259	22.423	54.8297	4.19561	2.06888	0.271	0.192	5.399	1.954	0.149522	4.81045	Ssa10004705,Domain of unknown function (DUF4228),DUF4228
Ssa13008822	0.377	0.284	0	0.220333	0.174	0.114	2.485	0.924333	4.19516	2.06873	0	0	0	0	0	#DIV/0!	Ssa13008822,Belongs to the SKP1 family,"Skp1,Skp1_POZ"
Ssa13008265	3.158	0.911	1.36	1.80967	3.823	4.072	14.862	7.58567	4.19175	2.06755	1.284	2.573	1.556	1.80433	0.997053	2.07181	Ssa13008265,"SANT SWI3, ADA2, N-CoR and TFIIIB'' DNA-binding domains",Myb_DNA-binding
Ssa01002110	17.673	12.159	12.32	14.0507	81.419	49.177	46.089	58.895	4.19162	2.06751	13.946	13.014	12.244	13.068	0.930063	2.17211	Ssa01002110,Sorbitol dehydrogenase-like,"ADH_N,ADH_zinc_N"
Ssa02009701	1.361	0.864	0.449	0.891333	3.933	3.923	3.339	3.73167	4.18661	2.06578	8.065	10.266	10.796	9.709	10.8927	-1.3795	Ssa02009701,Domain of unknown function (DUF3475),"DUF3475,DUF668"
Ssa06018837	3.687	1.289	1.429	2.135	11.813	9.209	5.791	8.93767	4.18626	2.06566	1.258	2.812	0.068	1.37933	0.646058	2.69593	Ssa06018837,cytochrome P450,p450
Ssa05016319	0.852	0.762	0.328	0.647333	2.487	1.204	4.436	2.709	4.18486	2.06518	2.465	2.704	2.67	2.613	4.03656	0.0520533	Ssa05016319,-,-
Ssa10004071	3.862	2.419	2.624	2.96833	11.141	13.903	12.216	12.42	4.18417	2.06494	4.104	4.272	5.105	4.49367	1.51387	1.4667	Ssa10004071,Belongs to the GRAS family,"DELLA,GRAS"
Ssa10003700	3.511	3.144	4.842	3.83233	14.482	17.164	16.424	16.0233	4.18109	2.06388	6.766	7.191	7.762	7.23967	1.8891	1.14618	Ssa10003700,MOB kinase activator-like,Mob1_phocein
Ssa10003932	0.59	0.555	0.065	0.403333	2.046	2.067	0.945	1.686	4.18017	2.06356	1.843	1.498	1.365	1.56867	3.88926	0.104066	Ssa10003932,Yip1 domain,Yip1
Ssa08023609	0.076	0.029	0.134	0.0796667	0.58	0.378	0.041	0.333	4.17992	2.06347	0	0	0	0	0	#DIV/0!	Ssa08023609,CBS domain-containing protein,"CBS,PB1"
Ssa13008526	0.415	0.209	0.731	0.451667	2.69	0.752	2.219	1.887	4.17786	2.06276	6.108	2.38	43.283	17.257	38.2074	-3.19302	Ssa13008526,histidine-containing phosphotransfer protein,Hpt
Ssa10004220	23.285	22.693	14.565	20.181	80.991	26.215	145.674	84.2933	4.17687	2.06242	109.434	104.608	134.677	116.24	5.75986	-0.463612	Ssa10004220,Homeobox-leucine zipper protein ATHB-6-like,"HALZ,Homeobox"
Ssa12006966	452.091	89.404	480.655	340.717	523.52	2698.56	1047.08	1423.05	4.17665	2.06235	12.123	15.093	31.997	19.7377	0.0579299	6.1719	Ssa12006966,Wound-induced protein,DUF3774
Ssa10003759	0.034	0	0	0.0113333	0.111	0.031	0	0.0473333	4.17647	2.06228	0	0	0	0	0	#DIV/0!	Ssa10003759,clathrin assembly,ANTH
Ssa09025465	0.363	1.697	0.831	0.963667	5.815	3.813	2.446	4.02467	4.17641	2.06226	2.565	2.158	1.178	1.967	2.04116	1.03287	Ssa09025465,Fasciclin-like arabinogalactan protein,Fasciclin
Ssa09025172	92.825	114.275	106.07	104.39	448.818	286.792	571.155	435.588	4.1727	2.06098	254.424	282.616	183.164	240.068	2.29972	0.859522	Ssa09025172,Belongs to the peptidase C1 family,"Granulin,Inhibitor_I29,Peptidase_C1"
Ssa12007699	0	0	0.035	0.0116667	0.054	0.071	0.021	0.0486667	4.17143	2.06054	0	0	0	0	0	#DIV/0!	Ssa12007699,-,Hemopexin
Ssa10004680	127.987	162.73	197.22	162.646	1092.25	535.041	407.061	678.118	4.1693	2.0598	0.167	0.178	0.469	0.271333	0.00166825	11.2873	Ssa10004680,Reversible hydration of carbon dioxide,Pro_CA
Ssa10003995	3.675	8.302	9.203	7.06	41.511	44.745	2.039	29.4317	4.16879	2.05963	0	0	0	0	0	#DIV/0!	Ssa10003995,Hydrophobic seed protein,Hydrophob_seed
Ssa12007095	1.95	1.181	2.741	1.95733	6.92	8.933	8.617	8.15667	4.16723	2.05909	0.109	0.315	0.245	0.223	0.113931	5.19286	Ssa12007095,Phosphoenolpyruvate carboxylase,PEPcase
Ssa06018075	0.506	0.286	0.334	0.375333	1.463	0.458	2.771	1.564	4.16696	2.059	8.463	5.634	7.518	7.205	19.1963	-2.20376	Ssa06018075,-,-
Ssa10003543	1.289	1.553	2.495	1.779	1.55	15.04	5.647	7.41233	4.16657	2.05886	0.095	0.101	0.398	0.198	0.111298	5.22636	Ssa10003543,Major allergen Pru,Bet_v_1
Ssa09024497	94.322	40.605	102.417	79.1147	59.818	882.951	46.135	329.635	4.16654	2.05885	0	0	0	0	0	#DIV/0!	Ssa09024497,lipid-transfer protein DIR1,LTP_2
Ssa02009867	70.728	24.667	39.316	44.9037	99.296	221.916	240.026	187.079	4.16624	2.05875	146.653	173.849	198.813	173.105	3.85503	0.112003	Ssa02009867,protein kinase activity,-
Ssa06018854	4.12	4.693	7.25	5.35433	7.769	12.231	46.9	22.3	4.16485	2.05826	0	0	0	0	0	#DIV/0!	Ssa06018854,Ocs element-binding factor,bZIP_1
Ssa02011160	1.305	6.614	5.059	4.326	16.152	13.432	24.423	18.0023	4.16143	2.05708	95.561	66.589	46.498	69.5493	16.0771	-1.94985	Ssa02011160,Cytochrome p450,p450
Ssa09025084	3.947	2.007	3.168	3.04067	13.178	21.262	3.44	12.6267	4.1526	2.05401	3.029	3.543	3.553	3.375	1.10995	1.90351	Ssa09025084,pectinesterase pectinesterase inhibitor,"PMEI,Pectinesterase"
Ssa09024036	69.497	51.569	37.341	52.8023	239.569	215.945	202.271	219.262	4.1525	2.05398	0.834	1.33	1.801	1.32167	0.0250305	7.37415	Ssa09024036,Nitrile-specifier protein,"Kelch_1,Kelch_3,Kelch_4"
Ssa01002228	3.559	4.297	3.725	3.86033	17.681	10.545	19.8	16.0087	4.14696	2.05206	5.819	5.466	10.418	7.23433	1.87402	1.14592	Ssa01002228,Ornithine cyclodeaminase/mu-crystallin family,OCD_Mu_crystall
Ssa06018602	27.703	10.006	10.651	16.12	62.498	34.477	103.414	66.7963	4.14369	2.05092	0.786	0.88	2.129	1.265	0.0784739	5.72256	Ssa06018602,F-box kelch-repeat protein,"Kelch_1,Kelch_6"
Ssa12007284	1.105	0.579	0.888	0.857333	3.532	3.259	3.849	3.54667	4.13686	2.04854	0.6	0.751	0.816	0.722333	0.842535	2.29573	Ssa12007284,-,-
Ssa12007446	5.709	5.245	5.425	5.45967	38.444	19.88	9.241	22.5217	4.1251	2.04443	5.078	4.907	5.507	5.164	0.945845	2.12475	Ssa12007446,low-specificity L-threonine aldolase 1,Beta_elim_lyase
Ssa01002601	1.657	0.985	0.614	1.08533	2.46	7.099	3.867	4.47533	4.12346	2.04386	1.282	2.181	2.827	2.09667	1.93182	1.0939	Ssa01002601,-,-
Ssa13009386	4.784	2.784	2.966	3.51133	12.609	8.679	22.116	14.468	4.12037	2.04277	6.055	6.265	4.552	5.624	1.60167	1.3632	Ssa13009386,Belongs to the GRAS family,GRAS
Ssa12007949	3.255	1.608	1.521	2.128	4.116	2.576	19.562	8.75133	4.11247	2.04	102.364	85.073	64.955	84.1307	39.5351	-3.26506	Ssa12007949,Metal tolerance protein,"Cation_efflux,ZT_dimer"
Ssa11006362	22.049	10.23	12.636	14.9717	31.417	84.401	68.805	61.541	4.1105	2.03931	41.605	39.912	47.031	42.8493	2.86203	0.522275	Ssa11006362,ZINC FINGER protein,-
Ssa12007125	0.508	0.319	0.149	0.325333	1.214	1.838	0.95	1.334	4.10041	2.03577	112.253	128.107	115.032	118.464	364.131	-6.47255	Ssa12007125,psbQ-like protein 2,PsbQ
Ssa07021631	20.05	44.249	34.545	32.948	183.939	94.114	127.122	135.058	4.09914	2.03532	1.686	1.255	2.007	1.64933	0.0500587	6.35556	Ssa07021631,glutamate synthase,"Fer4_20,GATase_2,GXGXG,Glu_syn_central,Glu_synthase,Pyr_redox_2"
Ssa09025583	54.13	7.897	19.124	27.0503	78.191	136.391	117.924	110.835	4.09737	2.0347	32.392	10.507	14.294	19.0643	0.704773	2.53947	Ssa09025583,MADS-box transcription factor,"K-box,SRF-TF"
Ssa03013508	0	0	0.113	0.0376667	0	0.463	0	0.154333	4.09735	2.03469	0	0	0	0	0	#DIV/0!	Ssa03013508,Belongs to the SKP1 family,"Skp1,Skp1_POZ"
Ssa06019568	9.422	3.511	5.128	6.02033	21.204	14.496	38.192	24.6307	4.09125	2.03254	13.781	13.129	13.793	13.5677	2.25364	0.860283	Ssa06019568,Tyrosine-protein phosphatase,Y_phosphatase2
Ssa04014883	5.967	17.582	9.587	11.0453	43.075	15.252	76.92	45.0823	4.08157	2.02913	83.344	42.972	46.85	57.722	5.22592	-0.356559	Ssa04014883,Uric acid degradation bifunctional protein,"OHCU_decarbox,Transthyretin"
Ssa04014871	2.898	4.523	5.348	4.25633	16.768	13.935	21.407	17.37	4.08098	2.02891	19.639	19.271	16.035	18.315	4.303	-0.0764279	Ssa04014871,Protein of unknown function (DUF1639),DUF1639
Ssa03012793	22.11	20.771	16.735	19.872	100.697	59.421	83.055	81.0577	4.07899	2.02821	29.153	13.82	8.883	17.2853	0.869834	2.2294	Ssa03012793,f-box protein,"F-box,PP2"
Ssa09025453	3.238	3.593	3.112	3.31433	14.09	18.345	8.081	13.5053	4.07483	2.02674	1.785	2.364	2.433	2.194	0.661973	2.62189	Ssa09025453,Belongs to the glycosyl hydrolase 17 family,"Glyco_hydro_17,X8"
Ssa04015477	0.397	0.498	0.465	0.453333	2.446	1.674	1.413	1.84433	4.06838	2.02446	1.458	1.033	0.51	1.00033	2.20662	0.882619	Ssa04015477,RESISTANCE protein,"NB-ARC,TIR"
Ssa13008046	3.21	2.138	1.955	2.43433	7.994	9.045	12.664	9.901	4.06723	2.02405	20.331	22.284	26.012	22.8757	9.3971	-1.20817	Ssa13008046,-,-
Ssa10003525	39.619	53.402	17.301	36.774	173.73	107.791	167.151	149.557	4.06693	2.02394	22.374	22.594	14.032	19.6667	0.534798	2.92687	Ssa10003525,acetate butyrate--CoA ligase AAE7,"AMP-binding,AMP-binding_C"
Ssa02009734	3.077	7.137	8.989	6.401	36.692	17.146	24.2	26.0127	4.06384	2.02285	2.262	2.164	2.422	2.28267	0.356611	3.51042	Ssa02009734,Carboxylesterase,Abhydrolase_3
Ssa04015458	6.738	3.171	4.199	4.70267	7.791	40.376	9.149	19.1053	4.06266	2.02242	0	0	0	0	0	#DIV/0!	Ssa04015458,-,-
Ssa05016877	0.07	0.026	0.154	0.0833333	0.39	0.381	0.244	0.338333	4.06	2.02148	0.464	0.96	1.435	0.953	11.436	-1.49403	Ssa05016877,WEB family protein At1g12150-like,WEMBL
Ssa07020272	0.391	1.237	0.826	0.818	2.46	2.689	4.806	3.31833	4.05664	2.02029	2.875	2.75	8.21	4.61167	5.63773	-0.474829	Ssa07020272,salicylic acid-binding protein 2-like,"Abhydrolase_1,Abhydrolase_6"
Ssa03012421	0	0.247	0.337	0.194667	0.329	1.631	0.409	0.789667	4.05651	2.02024	0	0	0	0	0	#DIV/0!	Ssa03012421,Belongs to the 'GDSL' lipolytic enzyme family,Lipase_GDSL
Ssa13008830	2.82	1.109	1.592	1.84033	13.138	6.814	2.406	7.45267	4.04963	2.01779	3.31	5.294	3.15	3.918	2.12896	0.927639	Ssa13008830,Belongs to the UDP-glycosyltransferase family,UDPGT
Ssa08023695	1.539	1.298	0.758	1.19833	4.526	4.954	5.064	4.848	4.04562	2.01636	125.239	117.094	147.814	130.049	108.525	-4.74552	Ssa08023695,-,-
Ssa13008545	0.66	0.39	0.332	0.460667	1.46	2.344	1.787	1.86367	4.04559	2.01635	2.909	3.387	5.054	3.78333	8.21274	-1.02151	Ssa13008545,WD repeat-containing protein,WD40
Ssa03012687	25.466	27.393	32.548	28.469	110.264	135.554	99.226	115.015	4.04	2.01435	33.938	42.796	43.496	40.0767	1.40773	1.52098	Ssa03012687,Auxin canalisation,"Auxin_canalis,PH_2"
Ssa05015851	16.661	9.373	16.76	14.2647	11.194	88.194	73.453	57.6137	4.03891	2.01397	36.142	45.387	132.405	71.3113	4.99916	-0.30772	Ssa05015851,BOI-related E3 ubiquitin-protein ligase,zf-C3HC4_3
Ssa02011876	0.239	0.495	0.315	0.349667	1.299	1.946	0.99	1.41167	4.03718	2.01335	0.088	0.373	0.277	0.246	0.703527	2.52067	Ssa02011876,transcription factor,HLH
Ssa03013365	0.19	0.287	0.112	0.196333	0.382	0.976	1.017	0.791667	4.03226	2.01159	0	0	0	0	0	#DIV/0!	Ssa03013365,DnaJ homolog subfamily B member,"DnaJ,DnaJ_C"
Ssa13008340	0.902	1.31	0.737	0.983	1.848	5.946	4.097	3.96367	4.03221	2.01157	0.805	0.302	0.597	0.568	0.577823	2.80287	Ssa13008340,RING-H2 finger protein,zf-RING_2
Ssa03014153	0.094	0.071	0.249	0.138	0.655	0.256	0.757	0.556	4.02899	2.01042	0	0	0	0	0	#DIV/0!	Ssa03014153,21 kDa protein-like,PMEI
Ssa13008401	0.289	0	0	0.0963333	0.401	0.609	0.154	0.388	4.02768	2.00995	11.53	9.397	69.282	30.0697	312.142	-6.27611	Ssa13008401,Auxin-binding protein,Cupin_1
Ssa03014241	0.509	2.146	0.478	1.04433	4.771	4.113	3.734	4.206	4.02745	2.00987	143.308	94.648	61.749	99.9017	95.6607	-4.56999	Ssa03014241,ZINC FINGER protein,"zf-C2H2,zf-C2H2_jaz"
Ssa09025332	2.025	1.991	2.363	2.12633	9.804	10.539	5.298	8.547	4.0196	2.00705	0.456	0.291	0.191	0.312667	0.147045	4.77272	Ssa09025332,Folate-Biopterin Transporter,BT1
Ssa10003603	10.712	7.145	9.647	9.168	25.453	54.506	30.594	36.851	4.01952	2.00702	85.316	85.404	66.587	79.1023	8.62809	-1.10202	Ssa10003603,Protein phosphatase 2C 40,PP2C
Ssa09025528	28.387	67.708	53.462	49.8523	218.683	102.042	279.894	200.206	4.01599	2.00575	66.987	60.294	48.304	58.5283	1.17403	1.77428	Ssa09025528,Casein kinase,Pkinase
Ssa10003544	108.556	62.668	64.852	78.692	107.45	668.733	171.313	315.832	4.01352	2.00487	1.937	0.915	1.638	1.49667	0.0190193	7.72126	Ssa10003544,Major allergen Pru,Bet_v_1
Ssa07020990	6.479	6.842	7.636	6.98567	33.035	29.962	21.114	28.037	4.0135	2.00486	17.822	21.266	19.653	19.5803	2.80293	0.517927	Ssa07020990,belongs to the protein kinase superfamily,Pkinase
Ssa03013219	9.199	3.038	2.698	4.97833	9.852	34.739	15.346	19.979	4.01319	2.00475	24.676	30.766	16.938	24.1267	4.84633	-0.272144	Ssa03013219,protein kinase inhibitor activity,-
Ssa13009160	2.46	0.772	0.541	1.25767	3.412	6.303	5.42	5.045	4.0114	2.0041	0.678	1.201	1.898	1.259	1.00106	2.00258	Ssa13009160,RING-H2 finger protein,zf-RING_2
Ssa01001191	21.878	28.655	29.075	26.536	110.951	144.185	64.156	106.431	4.0108	2.00389	43.169	42.777	39.631	41.859	1.57744	1.3463	Ssa01001191,caffeic acid,"Dimerisation,Methyltransf_2"
Ssa05017019	4.555	2.494	0.911	2.65333	17.713	7.677	6.525	10.6383	4.00942	2.00339	0	0	0	0	0	#DIV/0!	Ssa05017019,-,-
Ssa02009660	4.734	3.347	3.099	3.72667	13.698	14.778	16.316	14.9307	4.00644	2.00232	56.871	56.34	51.015	54.742	14.6893	-1.87437	Ssa02009660,F-box protein,F-box-like
Ssa07020466	1.401	1.363	0.771	1.17833	3.079	4.595	6.488	4.72067	4.00622	2.00224	17.986	17.017	13.068	16.0237	13.5986	-1.76314	Ssa07020466,Serine acetyltransferase,"Hexapep,SATase_N"
Ssa04014893	4.833	3.866	3.606	4.10167	17.361	22.674	9.243	16.426	4.00471	2.0017	0.032	0.101	0.1	0.0776667	0.0189354	7.72447	Ssa04014893,Belongs to the UDP-glycosyltransferase family,UDPGT
Ssa09024442	0.088	0.333	0.039	0.153333	0.592	0.919	0.33	0.613667	4.00217	2.00078	0.422	0.38	0.273	0.358333	2.33696	0.776153	Ssa09024442,CBL-interacting serine threonine-protein kinase,"NAF,Pkinase"
Ssa10003494	16.566	24.716	21.896	21.0593	91.119	62.093	99.282	84.1647	3.99655	1.99875	184.482	207.752	134.086	175.44	8.33075	-1.05969	Ssa10003494,enoyl-CoA hydratase,ECH_1
Ssa11005767	128.298	48.673	35.024	70.665	5.286	839.347	2.106	282.246	3.99415	1.99789	0	0	0	0	0	#DIV/0!	Ssa11005767,lipid-transfer protein,LTP_2
Ssa09025790	0.243	0.305	1.14	0.562667	2.136	3.957	0.649	2.24733	3.99408	1.99786	0	0	0.063	0.021	0.0373223	6.74168	Ssa09025790,Mediates both low-affinity uptake and efflux of sugar across the membrane,MtN3_slv
Ssa12006612	2.277	2.756	4.293	3.10867	24.073	8.533	4.606	12.404	3.99014	1.99644	1.256	2.478	0.941	1.55833	0.501287	2.99273	Ssa12006612,Belongs to the MIP aquaporin (TC 1.A.8) family,MIP
Ssa09024574	1.539	1.668	1.57	1.59233	4.953	4.676	9.404	6.34433	3.9843	1.99433	3.393	2.981	2.28	2.88467	1.8116	1.13706	Ssa09024574,E3 ubiquitin-protein ligase,"zf-RING_11,zf-RING_2"
Ssa09024405	0.485	0.457	0.213	0.385	2.692	0.548	1.361	1.53367	3.98355	1.99405	0.089	0	0.094	0.061	0.158442	4.65203	Ssa09024405,Domain of unknown function (DUF4228),DUF4228
Ssa02010724	1.048	3.521	2.271	2.28	12.126	4.322	10.799	9.08233	3.98348	1.99403	27.785	21.185	16.961	21.977	9.63904	-1.27486	Ssa02010724,F-Box protein,-
Ssa13008160	14.083	3.598	4.978	7.553	20.586	38.212	31.437	30.0783	3.9823	1.9936	167.86	210.924	219.98	199.588	26.425	-2.73023	Ssa13008160,Fk506-binding protein,HMA
Ssa09025266	0.778	1.447	1.409	1.21133	7.511	3.807	3.153	4.82367	3.98211	1.99353	2.051	2.109	3.036	2.39867	1.98019	1.0079	Ssa09025266,Desaturase,"Cyt-b5,FA_desaturase"
Ssa01002623	327.866	204.109	141.128	224.368	1200.33	818.216	661.542	893.364	3.9817	1.99338	127.387	206.227	201.994	178.536	0.79573	2.32303	Ssa01002623,Belongs to the MIP aquaporin (TC 1.A.8) family,MIP
Ssa07020594	0.325	0.62	0.395	0.446667	2.771	1.174	1.387	1.77733	3.9791	1.99244	0.037	0.02	0.019	0.0253333	0.0567164	6.13253	Ssa07020594,Serine threonine-protein kinase-like protein,"Pkinase,RCC1_2"
Ssa01000094	19.257	8.31	27.94	18.5023	85.883	90.649	44.097	73.543	3.9748	1.99088	0.414	0.44	0.608	0.487333	0.026339	7.23754	Ssa01000094,Mitochondrial import inner membrane translocase subunit,Tim17
Ssa07021430	2.916	1.979	4.192	3.029	9.517	19.169	7.416	12.034	3.97293	1.9902	2.114	1.54	5.072	2.90867	0.960273	2.04869	Ssa07021430,Belongs to the multi antimicrobial extrusion (MATE) (TC 2.A.66.1) family,MatE
Ssa02009770	3.092	2.816	2.591	2.833	10.187	15.767	7.787	11.247	3.97	1.98914	0.411	0.345	1.636	0.797333	0.281445	3.81821	Ssa02009770,Transporter,OPT
Ssa04015102	36.138	25.992	50.657	37.5957	116.616	232.082	98.469	149.056	3.9647	1.98721	33.206	34.45	29.136	32.264	0.858184	2.20785	Ssa04015102,-,-
Ssa02010025	47.41	28.137	38.25	37.9323	131.269	199.135	120.661	150.355	3.96377	1.98687	56.462	66.318	57.835	60.205	1.58717	1.32042	Ssa02010025,Peroxiredoxin-2F,Redoxin
Ssa06018973	0.173	0.13	0	0.101	0.24	0.313	0.647	0.4	3.9604	1.98564	3.369	3.581	3.737	3.56233	35.2706	-3.15475	Ssa06018973,Protein of unknown function (DUF1685),DUF1685
Ssa01000746	4.815	6.554	9.94	7.103	47.023	22.167	15.17	28.12	3.95889	1.9851	0	0	0	0	0	#DIV/0!	Ssa01000746,transcription factor,Myb_DNA-binding
Ssa03013484	2.862	1.109	1.629	1.86667	13.06	6.699	2.406	7.38833	3.95804	1.98478	3.403	5.36	3.15	3.971	2.12732	0.895747	Ssa03013484,Belongs to the UDP-glycosyltransferase family,UDPGT
Ssa07020730	0	0.291	0.34	0.210333	0.447	1.224	0.826	0.832333	3.95721	1.98448	0	0.755	0.149	0.301333	1.43265	1.4658	Ssa07020730,Belongs to the group II decarboxylase family,Pyridoxal_deC
Ssa08022445	1.199	6.561	5.059	4.273	15.646	10.465	24.536	16.8823	3.95093	1.98219	94.264	66.561	46.552	69.1257	16.1773	-2.03371	Ssa08022445,Cytochrome p450,p450
Ssa10003827	0.543	0.434	0.478	0.485	2.417	1.841	1.486	1.91467	3.94777	1.98104	0.025	0	0	0.00833333	0.0171821	7.84398	Ssa10003827,receptor-like serine threonine-protein kinase,"Pkinase,Pkinase_Tyr,Usp"
Ssa03012232	25.062	18.336	23.835	22.411	90.847	97.458	77.023	88.4427	3.9464	1.98054	12.829	13.714	18.871	15.138	0.675472	2.54657	Ssa03012232,Ganglioside-induced differentiation-associated protein,CRAL_TRIO_2
Ssa12006916	0.35	0.923	0.462	0.578333	1.944	1.901	2.995	2.28	3.94236	1.97906	115.383	135.771	73.947	108.367	187.378	-5.57075	Ssa12006916,B-Box-type zinc finger,zf-B_box
Ssa09025265	4.27	1.286	3.757	3.10433	7.241	23.687	5.779	12.2357	3.94148	1.97874	1.256	2.669	4.394	2.773	0.893267	2.14157	Ssa09025265,-,-
Ssa12006838	37.558	14.463	21.431	24.484	76.377	156.16	56.522	96.353	3.93535	1.97649	181.274	236.93	217.13	211.778	8.64965	-1.13615	Ssa12006838,Protein of unknown function (DUF1279),DUF1279
Ssa02010204	1.907	2.728	3.942	2.859	9.876	12.416	11.458	11.25	3.93494	1.97634	0.35	0.074	0.074	0.166	0.0580623	6.0826	Ssa02010204,Cupin domain,Cupin_1
Ssa06017599	6.54	4.061	12.694	7.765	7.702	56.77	27.156	30.5427	3.93338	1.97577	14.868	24.757	3.278	14.301	1.84173	1.09471	Ssa06017599,nicotianamine,NAS
Ssa03013429	12.052	4.969	10.062	9.02767	41.157	39.633	25.599	35.463	3.92826	1.97389	0.06	0.032	0.063	0.0516667	0.00572315	9.42287	Ssa03013429,Belongs to the multi antimicrobial extrusion (MATE) (TC 2.A.66.1) family,MatE
Ssa01002721	4.586	13.354	7.534	8.49133	46.832	19.553	33.672	33.3523	3.92781	1.97372	52.974	44.75	40.156	45.96	5.41258	-0.462591	Ssa01002721,Belongs to the AAA ATPase family,"AAA,MIT,Vps4_C"
Ssa05017357	2.282	3.493	4.55	3.44167	24.709	14.066	1.767	13.514	3.92659	1.97328	74.495	59.537	67.816	67.2827	19.5494	-2.31578	Ssa05017357,Nodulin-like,Nodulin-like
Ssa11006258	59.138	33.126	63.515	51.9263	141.64	362.363	106.771	203.591	3.92077	1.97114	56.62	69.663	78.883	68.3887	1.31703	1.57385	Ssa11006258,leucine-rich repeat extensin-like protein,-
Ssa02010078	0	0	0.037	0.0123333	0.078	0	0.067	0.0483333	3.91892	1.97046	1.204	0.558	1.005	0.922333	74.7838	-4.2542	Ssa02010078,Belongs to the major facilitator superfamily. Sugar transporter (TC 2.A.1.1) family,Sugar_tr
Ssa08023818	9.083	6.052	7.708	7.61433	20.482	36.493	32.525	29.8333	3.91805	1.97014	4.106	4.05	4.962	4.37267	0.574268	2.77034	Ssa08023818,mitogen-activated protein kinase,Pkinase
Ssa02009933	10.103	4	4.521	6.208	14.782	29.933	28.241	24.3187	3.91731	1.96986	1745.77	1792.72	2597.88	2045.46	329.488	-6.39422	Ssa02009933,photosystem II core complex proteins psbY,PsbY
Ssa05016147	0.105	0.41	0.589	0.368	1.443	1.382	1.499	1.44133	3.91667	1.96963	37.213	25.189	38.742	33.7147	91.6159	-4.5479	Ssa05016147,phosphatase 2c,"PP2C,SpoIIE"
Ssa07021385	102.663	68.138	95.475	88.7587	236.931	412.124	392.259	347.105	3.91066	1.96741	4.305	6.219	6.073	5.53233	0.0623301	5.97134	Ssa07021385,MADS-box transcription factor,"K-box,SRF-TF"
Ssa11005685	32.167	15.69	15.778	21.2117	47.395	70.545	130.871	82.937	3.90997	1.96716	17.745	20.284	13.532	17.187	0.810262	2.2707	Ssa11005685,Ninja-family protein,"EAR,Jas,NINJA_B"
Ssa10003315	0.152	0	0.134	0.0953333	0.843	0.275	0	0.372667	3.90909	1.96683	0	0	0	0	0	#DIV/0!	Ssa10003315,DNA-binding domain in plant proteins such as APETALA2 and EREBPs,AP2
Ssa06018933	1.015	3.82	2.142	2.32567	12.599	3.028	11.599	9.07533	3.90225	1.96431	20.996	32.423	43.066	32.1617	13.829	-1.82532	Ssa06018933,Belongs to the cytochrome P450 family,p450
Ssa13009192	24.945	24.55	48.899	32.798	93.204	196.126	94.567	127.966	3.90163	1.96408	20.75	26.499	29.889	25.7127	0.783971	2.31521	Ssa13009192,-,-
Ssa01001047	15.403	45.446	32.525	31.1247	187.63	82.508	93.839	121.326	3.89806	1.96275	33.646	27.655	29.644	30.315	0.973986	2.00078	Ssa01001047,Nuclear transcription factor Y subunit,CBFB_NFYA
Ssa09025689	0.134	0.503	0.117	0.251333	0.926	0.906	1.106	0.979333	3.89655	1.9622	2.159	1.773	2.009	1.98033	7.87931	-1.01587	Ssa09025689,MADS-box transcription factor,SRF-TF
Ssa03014195	2.645	2.362	1.962	2.323	8.477	5.161	13.506	9.048	3.89496	1.96161	76.454	71.012	55.354	67.6067	29.1032	-2.90149	Ssa03014195,Ankyrin repeat-containing protein,"Ank,Ank_2,Ank_4,PGG"
Ssa01002664	0.324	0.284	0.095	0.234333	0.349	0.829	1.556	0.911333	3.88905	1.95942	0	0.042	0.042	0.028	0.119488	5.02448	Ssa01002664,Belongs to the peptidase C1 family,"Inhibitor_I29,Peptidase_C1"
Ssa06018704	3.264	1.658	2.371	2.431	7.566	7.449	13.321	9.44533	3.88537	1.95805	0	0	0	0	0	#DIV/0!	Ssa06018704,Protein NRT1 PTR FAMILY,PTR2
Ssa10004447	0.138	0.063	0.049	0.0833333	0.243	0.401	0.326	0.323333	3.88	1.95606	0.224	0.26	0.321	0.268333	3.22	0.268996	Ssa10004447,Belongs to the cullin family,"Cullin,Cullin_Nedd8"
Ssa03012190	0.985	1.558	0.867	1.13667	4.147	0.891	8.159	4.399	3.87009	1.95237	8.547	7.622	10.494	8.88767	7.81906	-1.01463	Ssa03012190,phospholipid glycerol acyltransferase family protein,Acyltransferase
Ssa04014364	0	0.014	0.016	0.01	0.017	0.05	0.049	0.0386667	3.86667	1.95109	0	0	0	0	0	#DIV/0!	Ssa04014364,receptor-like protein,"LRRNT_2,LRR_1,LRR_6,LRR_8"
Ssa10003003	1.646	0.713	1.536	1.29833	4.267	9.381	1.412	5.02	3.8665	1.95103	2.309	1.364	1.924	1.86567	1.43697	1.428	Ssa10003003,ethylene-responsive transcription factor,AP2
Ssa02009641	161.315	216.144	245.15	207.536	731.392	1242.77	431.265	801.807	3.86346	1.94989	0.457	0.75	0.261	0.489333	0.00235782	10.6782	Ssa02009641,Carboxylesterase 1-like,Abhydrolase_3
Ssa03012507	1.482	1.401	0.86	1.24767	3.923	2.652	7.866	4.81367	3.85814	1.9479	1.043	0.838	1.192	1.02433	0.820999	2.23245	Ssa03012507,Pentatricopeptide repeat-containing protein,"DYW_deaminase,PPR,PPR_2"
Ssa13008301	39.791	34.883	27.484	34.0527	145.698	109.114	139.317	131.376	3.85803	1.94787	0	0.028	0	0.00933333	0.000274085	13.781	Ssa13008301,"D-arabinono-1,4-lactone oxidase","ALO,FAD_binding_4"
Ssa01002000	0	0.023	0.159	0.0606667	0.181	0.489	0.032	0.234	3.85714	1.94753	8.903	7.584	8.21	8.23233	135.698	-5.13672	Ssa01002000,Transporter,OPT
Ssa02012178	0	0.482	0.188	0.223333	0.987	0	1.597	0.861333	3.85672	1.94737	2.668	2.502	2.471	2.547	11.4045	-1.56416	Ssa02012178,RING-H2 finger protein,zf-RING_2
Ssa02009731	1.517	2.943	3.665	2.70833	8.337	10.234	12.721	10.4307	3.85132	1.94535	0.227	0.221	0.357	0.268333	0.0990769	5.28066	Ssa02009731,Histone deacetylation protein Rxt3,Rxt3
Ssa06019257	8.002	5.602	3.335	5.64633	15.777	24.251	25.198	21.742	3.85064	1.9451	7.637	9.981	16.9	11.506	2.03778	0.918098	Ssa06019257,-,-
Ssa02010017	0.025	0.019	0.179	0.0743333	0.318	0.322	0.217	0.285667	3.84305	1.94225	0.075	0.139	0.118	0.110667	1.48879	1.36811	Ssa02010017,Bulb-type mannose-specific lectin,"B_lectin,PAN_2,Pkinase"
Ssa05017150	0.026	0.199	0.186	0.137	0.868	0.526	0.184	0.526	3.83942	1.94089	0.719	0.413	0.939	0.690333	5.03893	-0.39223	Ssa05017150,Receptor protein kinase-like protein,"LRRNT_2,LRR_1,LRR_6,LRR_8,Pkinase,Pkinase_Tyr"
Ssa08023709	12.669	11.659	7.926	10.7513	23.203	22.713	77.877	41.2643	3.83807	1.94038	31.085	32.687	26.115	29.9623	2.78685	0.461745	Ssa08023709,Transcription factor,"DOG1,bZIP_1"
Ssa10003958	13.702	15.547	16.396	15.215	56.909	66.837	51.4	58.382	3.83713	1.94003	46.065	44.096	35.002	41.721	2.7421	0.48475	Ssa10003958,RING-like zinc finger,"zf-RING_11,zf-RING_2"
Ssa02012052	32.708	78.831	66.412	59.317	195.424	204.492	282.157	227.358	3.83293	1.93845	962.641	922.691	710.821	865.384	14.5891	-1.92838	Ssa02012052,Belongs to the MIP aquaporin (TC 1.A.8) family,MIP
Ssa11006143	1.888	0.934	0.569	1.13033	4.465	3.951	4.581	4.33233	3.83279	1.9384	33.186	38.474	28.678	33.446	29.5895	-2.94862	Ssa11006143,F-box kelch-repeat protein,Kelch_6
Ssa09025017	4.196	1.761	1.936	2.631	4.708	5.287	20.245	10.08	3.83124	1.93781	76.041	74.693	84.71	78.4813	29.8295	-2.96085	Ssa09025017,Ribosome-binding factor PSRP1,"Ribosom_S30AE_C,Ribosomal_S30AE"
Ssa07021276	0	0.035	0	0.0116667	0.043	0.042	0.049	0.0446667	3.82857	1.93681	9.965	8.278	10.283	9.50867	815.029	-7.7339	Ssa07021276,-,-
Ssa08023166	15.736	9.459	22.628	15.941	23.789	140.883	18.366	61.0127	3.82741	1.93637	183.911	296.195	729.463	403.19	25.2926	-2.72428	Ssa08023166,superfamily. Protein,TPR_17
Ssa03012681	17.646	16.623	9.871	14.7133	59.162	51.394	57.998	56.1847	3.81862	1.93305	0.419	0.405	0.64	0.488	0.0331672	6.84715	Ssa03012681,-,mit_SMPDase
Ssa02011240	1.048	0.884	0.774	0.902	2.791	4.473	3.068	3.444	3.81818	1.93289	87.381	95.228	69.736	84.115	93.2539	-4.61021	Ssa02011240,-,-
Ssa02010358	45.968	64.229	48.468	52.8883	142.787	62.47	399.355	201.537	3.81062	1.93003	374.577	467.348	455.671	432.532	8.17821	-1.10176	Ssa02010358,-,-
Ssa03013861	13.766	14.127	9.779	12.5573	31.738	58.748	53.057	47.8477	3.81034	1.92992	53.82	54.095	44.146	50.687	4.03645	-0.0831672	Ssa03013861,"Glucan endo-1,3-beta-glucosidase-like protein",X8
Ssa01000214	6.961	8.444	6.464	7.28967	29.48	29.613	24.067	27.72	3.80264	1.927	23.5	29.61	12.683	21.931	3.00851	0.337956	Ssa01000214,nicotianamine,NAS
Ssa02011198	0	0	0.091	0.0303333	0.048	0.187	0.111	0.115333	3.8022	1.92683	0.152	0.162	0.32	0.211333	6.96703	-0.873711	Ssa02011198,NADPH quinone,FMN_red
Ssa05016328	0.551	0.346	1.456	0.784333	0.553	7.897	0.491	2.98033	3.79983	1.92593	0.608	0.072	0.426	0.368667	0.470038	3.01508	Ssa05016328,Germin-like protein subfamily 1 member,Cupin_1
Ssa01002618	10.471	9.515	11.707	10.5643	45.66	34.692	40.063	40.1383	3.79942	1.92578	20.45	18.909	16.988	18.7823	1.7779	1.0956	Ssa01002618,synthase,"Anth_synt_I_N,Chorismate_bind,GATase"
Ssa02011285	1.537	3.031	2.512	2.36	8.666	8.871	9.346	8.961	3.79703	1.92487	4.224	3.317	3.022	3.521	1.49195	1.34767	Ssa02011285,Belongs to the CTL (choline transporter-like) family,Choline_transpo
Ssa02009650	3.406	6.074	5.573	5.01767	18.46	16.484	22.153	19.0323	3.79306	1.92336	30.88	23.95	24.763	26.531	5.28752	-0.479227	Ssa02009650,post-GPI attachment to proteins factor,Per1
Ssa01001126	5.927	3.905	3.911	4.581	11.763	20.771	19.524	17.3527	3.78796	1.92142	1.997	3.28	1.143	2.14	0.467147	3.01947	Ssa01001126,-,-
Ssa09024286	2.08	2.708	1.944	2.244	9.8	3.762	11.921	8.49433	3.78535	1.92043	8.951	11.917	9.263	10.0437	4.47579	-0.241713	Ssa09024286,Belongs to the GRAS family,GRAS
Ssa13009116	1.472	1.108	0.925	1.16833	3.451	7.795	2.021	4.42233	3.78516	1.92036	0.618	0.493	1.541	0.884	0.756633	2.32269	Ssa13009116,Late embryogenesis abundant protein,LEA_2
Ssa03012469	0.658	0.354	0.165	0.392333	3.783	0.17	0.502	1.485	3.78505	1.92031	1.244	1.91	0.58	1.24467	3.17247	0.254704	Ssa03012469,f-box protein,"F-box-like,LRR_6"
Ssa03013762	4.709	3.097	3.91	3.90533	13.774	19.677	10.878	14.7763	3.78363	1.91977	2.389	4.042	2.201	2.87733	0.73677	2.36048	Ssa03013762,Homeobox-leucine zipper protein,"HALZ,Homeobox"
Ssa02011301	64.329	48.353	55.518	56.0667	302.862	224.614	108.895	212.124	3.78342	1.91969	0.123	0.044	0.043	0.07	0.00124851	11.5653	Ssa02011301,Protein of unknown function (DUF642),DUF642
Ssa08021877	26.999	26.275	22.425	25.233	16.944	41.118	228.317	95.4597	3.78313	1.91958	243.585	247.503	379.47	290.186	11.5003	-1.60401	Ssa08021877,"Involved in biosynthesis of the thiamine precursor thiazole. Catalyzes the conversion of NAD and glycine to adenosine diphosphate 5-(2-hydroxyethyl)-4-methylthiazole-2-carboxylic acid (ADT), an adenylated thiazole intermediate. The reaction includes an iron-dependent sulfide transfer from a conserved cysteine residue of the protein to a thiazole intermediate. The enzyme can only unde…
Ssa02011744	26.535	26.319	22.681	25.1783	16.998	41.486	227.045	95.1763	3.78009	1.91842	244.354	249.998	378.215	290.856	11.5518	-1.61163	Ssa02011744,"Involved in biosynthesis of the thiamine precursor thiazole. Catalyzes the conversion of NAD and glycine to adenosine diphosphate 5-(2-hydroxyethyl)-4-methylthiazole-2-carboxylic acid (ADT), an adenylated thiazole intermediate. The reaction includes an iron-dependent sulfide transfer from a conserved cysteine residue of the protein to a thiazole intermediate. The enzyme can only unde…
Ssa11005470	22.132	13.358	14.093	16.5277	24.335	64.024	99.001	62.4533	3.77871	1.9179	0.38	0.404	0.465	0.416333	0.0251901	7.2289	Ssa11005470,Domain of unknown function (DUF4228),DUF4228
Ssa13008475	10.21	31.79	12.9	18.3	71.11	22.009	114.001	69.04	3.77268	1.91559	559.951	509.187	449.98	506.373	27.6706	-2.8747	Ssa13008475,Calcineurin B-like protein,"EF-hand_1,EF-hand_5,EF-hand_7,EF-hand_8"
Ssa12006660	0.091	0.99	0.399	0.493333	2.265	0.41	2.907	1.86067	3.77162	1.91518	3.2	2.409	1.4	2.33633	4.73581	-0.328426	Ssa12006660,"Pentatricopeptide repeat-containing protein At2g27800, mitochondrial-like","PPR,PPR_1,PPR_2,PPR_3"
Ssa07021758	294.318	121.019	237.015	217.451	237.791	1999.09	223.471	820.119	3.77152	1.91514	24.063	32.027	35.161	30.417	0.13988	4.75288	Ssa07021758,Protein EARLY RESPONSIVE TO DEHYDRATION 15-like,PAM2
Ssa03013347	3.142	4.506	2.896	3.51467	19.073	10.419	10.256	13.2493	3.76973	1.91446	17.596	17.883	13.7	16.393	4.66417	-0.30716	Ssa03013347,-,-
Ssa08022309	64.551	48.563	55.665	56.2597	303.325	224.362	108.419	212.035	3.76887	1.91413	0.123	0.044	0.043	0.07	0.00124423	11.5647	Ssa08022309,Protein of unknown function (DUF642),DUF642
Ssa08023497	9.357	9.981	9.931	9.75633	29.707	49.567	31.022	36.7653	3.76836	1.91394	8.98	9.747	10.631	9.786	1.00304	1.90955	Ssa08023497,4-coumarate--CoA ligase-like 9,"AMP-binding,AMP-binding_C"
Ssa08023569	0.19	0	0.501	0.230333	0.614	1.888	0.101	0.867667	3.767	1.91342	17.159	4.893	2.49	8.18067	35.5166	-3.23701	Ssa08023569,-,-
Ssa01002398	3.337	11.628	8.513	7.826	44.639	31.901	11.891	29.477	3.76655	1.91324	31.85	21.45	14.86	22.72	2.90314	0.375627	Ssa01002398,Pollen proteins Ole e I like,Pollen_Ole_e_I
Ssa02011297	8.042	7.452	8.164	7.886	29.352	47.742	11.984	29.6927	3.76524	1.91274	1.122	1.095	0.636	0.951	0.120593	4.96452	Ssa02011297,Polyamine oxidase,Amino_oxidase
Ssa02010539	5.061	1.984	2.171	3.072	11.781	9.798	13.094	11.5577	3.76226	1.9116	3.075	3.529	3.97	3.52467	1.14735	1.71329	Ssa02010539,Inositol-tetrakisphosphate 1-kinase,Ins134_P3_kin
Ssa08022325	1.61	3.031	2.512	2.38433	8.734	8.871	9.287	8.964	3.75954	1.91056	4.224	3.288	4.067	3.85967	1.61876	1.21567	Ssa08022325,Belongs to the CTL (choline transporter-like) family,Choline_transpo
Ssa12007189	5.916	2.546	4.648	4.37	4.691	19.302	25.284	16.4257	3.75873	1.91025	20.658	28.23	29.514	26.134	5.98032	-0.669976	Ssa12007189,-,-
Ssa01001327	68.667	46.867	39.804	51.7793	185.822	202.714	194.863	194.466	3.75567	1.90907	48.88	68.333	53.063	56.7587	1.09616	1.77661	Ssa01001327,Ras-related protein,Ras
Ssa11006121	5.361	4.333	2.081	3.925	12.724	9.768	21.73	14.7407	3.75558	1.90904	6.258	6.836	5.414	6.16933	1.5718	1.25662	Ssa11006121,MOB kinase activator-like,Mob1_phocein
Ssa06018934	5.561	6.46	6.849	6.29	38.981	11.855	20.031	23.6223	3.75554	1.90902	4.205	5.027	7.234	5.48867	0.872602	2.10562	Ssa06018934,-,-
Ssa05016097	3.501	3.347	3.357	3.40167	14.009	9.251	15.047	12.769	3.75375	1.90833	7.374	6.301	7.924	7.19967	2.11651	0.826644	Ssa05016097,Transmembrane protein 87B,Lung_7-TM_R
Ssa04015277	25.486	11.407	12.074	16.3223	64.704	58.513	60.553	61.2567	3.75294	1.90802	8.254	8.773	3.438	6.82167	0.417935	3.16667	Ssa04015277,-,-
Ssa03013437	0.458	0.115	1.154	0.575667	1.749	4.634	0.098	2.16033	3.75275	1.90795	4.708	7.173	3.507	5.12933	8.91025	-1.24752	Ssa03013437,Cysteine-rich receptor-like protein kinase,"Pkinase_Tyr,Stress-antifung"
Ssa04014452	0	0.06	0	0.02	0.183	0	0.042	0.075	3.75	1.90689	0	0	0	0	0	#DIV/0!	Ssa04014452,26S proteasome non-ATPase regulatory subunit,"JAB,MitMem_reg"
Ssa07021307	0.453	0.952	0.49	0.631667	3.007	2.74	1.356	2.36767	3.74828	1.90623	0.763	0.457	0.51	0.576667	0.912929	2.03766	Ssa07021307,DNA polymerase,"DEAD,DNA_pol_A,Helicase_C"
Ssa02010810	1.235	0.186	0.76	0.727	5.482	0.893	1.781	2.71867	3.73957	1.90287	39.936	20.547	18.866	26.4497	36.3819	-3.28228	Ssa02010810,DnaJ molecular chaperone homology domain,DnaJ
Ssa06018923	0.23	0	0	0.0766667	0.32	0.417	0.123	0.286667	3.73913	1.9027	0	0	0	0	0	#DIV/0!	Ssa06018923,Serine threonine-protein kinase,"OSR1_C,Pkinase"
Ssa12006971	64.641	25.778	144.061	78.16	138.955	625.379	112.378	292.237	3.73896	1.90264	3.974	2.464	1.912	2.78333	0.0356107	6.71418	Ssa12006971,Wound-induced protein,DUF3774
Ssa11005417	1.031	1.983	1.209	1.40767	5.19	6.317	4.282	5.263	3.73881	1.90258	3.114	1.61	3.888	2.87067	2.03931	0.8745	Ssa11005417,-,-
Ssa05017209	0.458	0.302	0.252	0.337333	3.416	0.362	0	1.25933	3.7332	1.90041	0.21	0.76	2.563	1.17767	3.49111	0.096729	Ssa05017209,Belongs to the iron ascorbate-dependent oxidoreductase family,"2OG-FeII_Oxy,DIOX_N"
Ssa01001078	1.374	1.065	1.138	1.19233	7.815	4.753	0.777	4.44833	3.73078	1.89948	1.753	1.579	1.653	1.66167	1.39363	1.42063	Ssa01001078,Lysosomal Pro-X,Peptidase_S28
Ssa01000370	119.496	45.473	267.48	144.15	215.243	1114.51	282.988	537.581	3.72932	1.89891	0.047	0.201	0.099	0.115667	0.000802407	12.1823	Ssa01000370,transcription factor,AP2
Ssa02009735	3.816	0.788	0.325	1.643	2.505	1.726	14.138	6.123	3.72672	1.89791	0.226	0.048	0.047	0.107	0.0651248	5.83856	Ssa02009735,Carboxylesterase,Abhydrolase_3
Ssa10004481	55.977	25.03	49.854	43.6203	105.622	227.744	153.839	162.402	3.72307	1.89649	1.646	1.211	1.063	1.30667	0.0299554	6.95753	Ssa10004481,-,-
Ssa11005158	18.282	22.101	27.017	22.4667	72.595	124.917	53.41	83.6407	3.72288	1.89642	0.315	0.223	0.055	0.197667	0.00879822	8.72499	Ssa11005158,Transcription factor that specifically binds AT-rich DNA sequences related to the nuclear matrix attachment regions (MARs),DUF296
Ssa11006181	7.6	7.938	5.349	6.96233	41.748	21.597	14.407	25.9173	3.72251	1.89627	108.134	101.52	93.047	100.9	14.4923	-1.96094	Ssa11006181,Encoded by,Mem_trans
Ssa10003031	3.337	5.264	4.683	4.428	16.937	8.909	23.596	16.4807	3.72192	1.89605	9.168	9.62	6.376	8.388	1.89431	0.974376	Ssa10003031,Cyclin-dependent kinase inhibitor,CDI
Ssa04014425	1.218	1.673	3.342	2.07767	5.237	8.037	9.915	7.72967	3.72036	1.89544	321.247	301.453	910.409	511.036	245.966	-6.04688	Ssa04014425,"The light-harvesting complex (LHC) functions as a light receptor, it captures and delivers excitation energy to photosystems with which it is closely associated",Chloroa_b-bind
Ssa05017102	0.782	0.589	0.275	0.548667	0.217	5.236	0.669	2.04067	3.71932	1.89504	54.286	50.851	49.624	51.587	94.0225	-4.6599	Ssa05017102,Photosystem I reaction centre subunit N (PSAN or PSI-N),PsaN
Ssa03012265	6.926	5.103	4.13	5.38633	10.519	12.244	37.306	20.023	3.71737	1.89428	18.846	16.168	14.656	16.5567	3.07383	0.274246	Ssa03012265,Histidine kinase,"HATPase_c,HisKA,Response_reg"
Ssa10004328	0.512	0.257	0.301	0.356667	0.211	3.553	0.213	1.32567	3.71682	1.89407	0.335	0.178	0.132	0.215	0.602804	2.62431	Ssa10004328,ethylene-responsive transcription factor,AP2
Ssa10004816	0.419	0.969	0.526	0.638	2.422	0.758	3.932	2.37067	3.71578	1.89366	0	0	0.023	0.00766667	0.0120167	8.27248	Ssa10004816,Serine threonine-protein kinase,Pkinase
Ssa04014833	8.298	105.696	12.843	42.279	404.958	16.096	49.618	156.891	3.71084	1.89175	4.263	5.702	19.829	9.93133	0.2349	3.98163	Ssa04014833,-,-
Ssa08022484	16.148	3.274	6.011	8.47767	4.021	82.013	8.295	31.443	3.70892	1.891	3.196	8.735	3.355	5.09533	0.60103	2.62549	Ssa08022484,-,-
Ssa07021738	0.817	1.107	0.287	0.737	1.133	0.739	6.325	2.73233	3.70737	1.8904	0.06	0.319	0.189	0.189333	0.256897	3.85113	Ssa07021738,Rare lipoprotein A (RlpA)-like double-psi beta-barrel,"DPBB_1,Pollen_allerg_1"
Ssa09024498	67.458	36.409	76.156	60.0077	47.671	571.237	48.155	222.354	3.70543	1.88964	0	0	0	0	0	#DIV/0!	Ssa09024498,lipid-transfer protein DIR1,LTP_2
Ssa11005666	7.412	14.899	26.481	16.264	87.367	44.653	48.72	60.2467	3.7043	1.8892	2.464	2.82	2.935	2.73967	0.16845	4.45881	Ssa11005666,D-aminoacyl-tRNA deacylase-like,tRNA_deacylase
Ssa09024635	484.651	113.492	234.916	277.686	152.705	2360.54	571.419	1028.22	3.70282	1.88862	1.087	2.036	2.935	2.01933	0.00727199	8.99206	Ssa09024635,Endochitinase,"Chitin_bind_1,Glyco_hydro_19"
Ssa04014995	0.355	0.534	0.659	0.516	0.419	5.205	0.105	1.90967	3.7009	1.88788	0.029	0.031	0	0.02	0.0387597	6.57718	Ssa04014995,Acts in the modification of cell walls via demethylesterification of cell wall pectin,"PMEI,Pectinesterase"
Ssa10004768	15.361	19.821	7.72	14.3007	48.457	45.54	64.548	52.8483	3.69552	1.88578	4.173	3.318	2.792	3.42767	0.239686	3.94656	Ssa10004768,ABC transporter A family member,"ABC2_membrane_3,ABC_tran"
Ssa09024018	139.731	114.766	135.815	130.104	524.199	391.784	525.988	480.657	3.69441	1.88534	89.563	111.076	108.082	102.907	0.79096	2.22367	Ssa09024018,SAM domain (Sterile alpha motif),"SAM_1,SAM_2"
Ssa04015145	0	0.03	0.07	0.0333333	0.11	0.216	0.043	0.123	3.69	1.88362	0	0	0	0	0	#DIV/0!	Ssa04015145,-,-
Ssa07019884	15.057	13.795	15.335	14.729	18.386	27.504	117.124	54.338	3.68918	1.8833	217.44	226.582	226.034	223.352	15.1641	-2.03929	Ssa07019884,Secoisolariciresinol dehydrogenase-like,adh_short_C2
Ssa02010815	6.907	8.112	8.686	7.90167	28.367	34.528	24.505	29.1333	3.68699	1.88244	14.184	10.734	13.847	12.9217	1.63531	1.17288	Ssa02010815,Belongs to the CTL (choline transporter-like) family,Choline_transpo
Ssa01002760	1.708	1.543	3.406	2.219	1.896	8.857	13.747	8.16667	3.68034	1.87984	0	0	0	0	0	#DIV/0!	Ssa01002760,RING-type zinc-finger,zf-RING_2
Ssa10002888	1.502	0.97	0.897	1.123	3.995	4.27	4.099	4.12133	3.66993	1.87575	16.881	13.792	17.059	15.9107	14.168	-1.94881	Ssa10002888,F-box Kelch-repeat protein,"F-box,F-box-like,Kelch_1"
Ssa01002423	1.678	0.957	0.582	1.07233	1.905	1.15	8.748	3.93433	3.66895	1.87537	5.346	5.841	5.73	5.639	5.25863	-0.51932	Ssa01002423,Protein of unknown function (DUF1262),DUF1262
Ssa05017098	1.643	0.847	2.587	1.69233	13.838	3.833	0.947	6.206	3.66713	1.87465	0	0	0	0	0	#DIV/0!	Ssa05017098,Belongs to the peptidase S10 family,Peptidase_S10
Ssa07021817	0.25	0.188	0	0.146	0.116	1.356	0.134	0.535333	3.66667	1.87447	0	0.195	0.772	0.322333	2.20776	0.731884	Ssa07021817,-,-
Ssa12007100	20.411	23.278	25.846	23.1783	98.344	89.056	67.245	84.8817	3.66211	1.87268	20.466	19.083	21.221	20.2567	0.873948	2.06706	Ssa12007100,2-aminoethanethiol dioxygenase-like,PCO_ADO
Ssa03013254	22.48	16.98	10.166	16.542	67.4	45.668	68.425	60.4977	3.65722	1.87075	22.446	33.486	22.915	26.2823	1.58882	1.20279	Ssa03013254,Pyroglutamyl peptidase,Peptidase_C15
Ssa04014507	1005.71	517.737	460.936	661.461	1335.88	2487.3	3433.5	2418.89	3.65689	1.87062	2082.09	2597.67	2593.31	2424.36	3.66515	-0.0032562	Ssa04014507,-,-
Ssa02010847	34.947	23.967	39.638	32.8507	86.446	143.6	129.824	119.957	3.65157	1.86852	733.616	859.996	538.064	710.559	21.63	-2.56644	Ssa02010847,DNL zinc finger,zf-DNL
Ssa09025743	0	0	0.131	0.0436667	0	0	0.478	0.159333	3.64885	1.86744	4360.25	4494.85	3997.29	4284.13	98109.8	-14.7147	Ssa09025743,Photosystem II 22 kDa protein,Chloroa_b-bind
Ssa05016031	316.629	132.813	202.886	217.443	592.363	1043.75	743.294	793.136	3.64756	1.86693	127.807	172.833	145.546	148.729	0.68399	2.41488	Ssa05016031,Ras-related protein RABD1-like,Ras
Ssa03013210	26.537	22.386	29.117	26.0133	50.288	141.703	92.64	94.877	3.64725	1.86681	59.252	57.547	55.975	57.5913	2.21392	0.720207	Ssa03013210,Plant intracellular ras-group-related LRR protein,LRR_8
Ssa05017038	10.19	21.42	35.657	22.4223	91.183	63.222	90.809	81.738	3.64538	1.86607	0.057	0.03	0.06	0.049	0.00218532	10.704	Ssa05017038,Belongs to the glycosyl hydrolase 1 family,Glyco_hydro_1
Ssa07020790	0.92	0.297	0.462	0.559667	1.154	3.208	1.755	2.039	3.64324	1.86522	0.097	0	0.406	0.167667	0.299583	3.60419	Ssa07020790,-,-
Ssa02010237	0.601	0.553	0.352	0.502	2.439	0.906	2.14	1.82833	3.6421	1.86477	199.695	207.651	157.911	188.419	375.337	-6.68727	Ssa02010237,"Glutathione S-transferase, C-terminal domain","GST_C_2,GST_N_3"
Ssa08022313	8.083	7.452	8.127	7.88733	29.39	44.646	12.139	28.725	3.64192	1.8647	1.152	1.095	0.732	0.993	0.125898	4.85437	Ssa08022313,Polyamine oxidase,Amino_oxidase
Ssa01000817	60.965	66.825	164.275	97.355	209.933	689.813	163.741	354.496	3.64127	1.86444	67.401	62.04	42.199	57.2133	0.587677	2.63134	Ssa01000817,Cytochrome p450,p450
Ssa10004033	24.187	14.482	22.904	20.5243	42.183	114.035	67.926	74.7147	3.6403	1.86406	257.276	279.892	195.799	244.322	11.904	-1.70932	Ssa10004033,Protein of unknown function (DUF3119),DUF3119
Ssa01000598	66.452	13.745	20.85	33.6823	48.135	48.371	271.074	122.527	3.63771	1.86303	48.378	44.537	43.126	45.347	1.34631	1.43402	Ssa01000598,-,-
Ssa06017847	17.911	10.567	17.87	15.4493	45.943	59.62	63.031	56.198	3.63757	1.86297	5.565	7.935	4.845	6.115	0.39581	3.20009	Ssa06017847,Guanine nucleotide-binding protein subunit gamma,G-gamma
Ssa08022194	24.373	24.314	16.581	21.756	32.347	168.775	36.13	79.084	3.63504	1.86197	0	0	0	0	0	#DIV/0!	Ssa08022194,Belongs to the cytochrome P450 family,p450
Ssa12006887	3.174	2.966	5.786	3.97533	18.922	19.298	5.127	14.449	3.63466	1.86182	0.028	0	0	0.00933333	0.00234781	10.5963	Ssa12006887,L-ascorbate oxidase homolog,"Cu-oxidase,Cu-oxidase_2,Cu-oxidase_3"
Ssa10003255	2.99	1.162	0.764	1.63867	6.2	7.284	4.38	5.95467	3.63385	1.8615	0.319	0.301	0.261	0.293667	0.179211	4.34177	Ssa10003255,-,-
Ssa02010151	6.808	9.335	6.683	7.60867	28.039	23.528	31.354	27.6403	3.63274	1.86106	33.768	31.411	29.477	31.552	4.14685	-0.190956	Ssa02010151,dual specificity protein phosphatase,DSPc
Ssa09024659	1.244	0.319	0.664	0.742333	0.386	3.626	4.078	2.69667	3.63269	1.86104	0.282	0.331	5.698	2.10367	2.83386	0.358271	Ssa09024659,"transposition, RNA-mediated","Asp_protease_2,Chromo,RVT_1,Retrotrans_gag,gag-asp_proteas,rve"
Ssa01000812	0.174	0.328	0.537	0.346333	1.029	0.947	1.794	1.25667	3.62849	1.85937	3.558	2.828	4.678	3.688	10.6487	-1.55324	Ssa01000812,Phosphatidylinositol 4-kinase,PI3_PI4_kinase
Ssa02009524	5.344	0.996	1.6	2.64667	6.701	14.202	7.888	9.597	3.62607	1.85841	0.527	0.689	0.34	0.518667	0.19597	4.2097	Ssa02009524,transcription factor,AP2
Ssa01001856	2.841	10.482	6.606	6.643	23.087	20.042	29.118	24.0823	3.62522	1.85807	88.968	80.193	42.565	70.5753	10.624	-1.55119	Ssa01001856,"conserved protein UCP031088, alpha beta hydrolase","Abhydrolase_1,Hydrolase_4"
Ssa06019120	1.769	3.22	2.724	2.571	8.115	4.801	15.045	9.32033	3.62518	1.85805	3.685	7.258	1.024	3.989	1.55154	1.22435	Ssa06019120,DUF3700,DUF3700
Ssa07021305	38.865	11.502	16.501	22.2893	30.046	180.301	32.021	80.7893	3.62457	1.85781	0	0.302	0	0.100667	0.00451636	9.64843	Ssa07021305,-,-
Ssa09024780	4.988	3.346	5.984	4.77267	14.596	11.811	25.435	17.2807	3.62076	1.85629	7	7.794	7.768	7.52067	1.57578	1.20023	Ssa09024780,Domain of unknown function (DUF4228),DUF4228
Ssa06018270	6.395	8.26	7.53	7.395	21.453	34.212	24.648	26.771	3.62015	1.85605	3.218	3.113	2.885	3.072	0.415416	3.12342	Ssa06018270,Transcription factor,"Myb_CC_LHEQLE,Myb_DNA-binding"
Ssa12007089	0.464	0.611	0.638	0.571	2.695	2.019	1.487	2.067	3.61996	1.85598	5.626	4.326	4.832	4.928	8.63047	-1.25346	Ssa12007089,Inactive TPR repeat-containing thioredoxin TTL3-like,"TPR_1,TPR_11,TPR_16,TPR_19,TPR_2,TPR_6,TPR_8,Thioredoxin"
Ssa03012638	45.965	43.148	53.777	47.63	129.844	176.433	210.558	172.278	3.61701	1.8548	9.183	9.902	8.236	9.107	0.191203	4.24162	Ssa03012638,Belongs to the protein kinase superfamily,"Pkinase,Pkinase_Tyr"
Ssa10003602	0	0.528	0	0.176	1.377	0.158	0.374	0.636333	3.61553	1.85421	14.552	6.159	3.244	7.985	45.3693	-3.64944	Ssa10003602,-,-
Ssa12007121	0.153	0.077	0.269	0.166333	0.307	1.061	0.436	0.601333	3.61523	1.85409	21.626	21.112	17.115	19.951	119.946	-5.05215	Ssa12007121,zinc finger,-
Ssa07021009	116.144	56.755	55.575	76.158	198.436	284.846	342.172	275.151	3.6129	1.85316	160.464	223.224	152.983	178.89	2.34894	0.62115	Ssa07021009,f-box protein,"F-box,F-box-like"
Ssa02010073	3.217	4.352	3.093	3.554	10.498	10.562	17.442	12.834	3.61114	1.85246	6.57	5.958	5.288	5.93867	1.67098	1.11176	Ssa02010073,Heat Stress Transcription Factor,HSF_DNA-bind
Ssa07020581	38.419	19.372	62.019	39.9367	75.752	184.132	172.665	144.183	3.61029	1.85212	6.619	6.7	4.963	6.094	0.152592	4.56437	Ssa07020581,Prokaryotic RING finger family 4,"zf-C3HC4_3,zf-RING_2"
Ssa12007796	18.586	7.477	7.504	11.189	23.197	35.348	62.566	40.3703	3.60804	1.85121	180.8	189.275	163.572	177.882	15.898	-2.13956	Ssa12007796,Basic region leucine zipper,bZIP_2
Ssa06018852	8.806	9.472	10.177	9.485	38.767	38.851	25.029	34.2157	3.60734	1.85094	7.353	7.311	10.608	8.424	0.888139	2.02208	Ssa06018852,WPP domain-interacting tail-anchored protein,-
Ssa03014215	4.946	7.047	2.567	4.85333	17.032	19.728	15.739	17.4997	3.6057	1.85028	46.325	35.168	29.327	36.94	7.61126	-1.07786	Ssa03014215,ZINC FINGER protein,"zf-C2H2,zf-C2H2_6,zf-C2H2_jaz"
Ssa01002373	9.066	5.088	4.805	6.31967	21.041	30.352	16.905	22.766	3.60241	1.84896	21.317	22.128	30.287	24.5773	3.88902	-0.110448	Ssa01002373,Amino-transferase class IV,Aminotran_4
Ssa10002985	9.546	3.735	3.294	5.525	17.4	22.346	19.948	19.898	3.60145	1.84858	4.885	5.703	9.172	6.58667	1.19216	1.595	Ssa10002985,Ras-related protein,Ras
Ssa12007584	15.673	10.44	7.955	11.356	28.437	39.664	54.584	40.895	3.60118	1.84847	12.74	16.249	22.446	17.145	1.50977	1.25414	Ssa12007584,Functions as component of the Arp2 3 complex which is involved in regulation of actin polymerization and together with an activating nucleation-promoting factor (NPF) mediates the formation of branched actin networks,P16-Arc
Ssa13008322	0	0.072	0	0.024	0	0.259	0	0.0863333	3.59722	1.84688	0	0	0	0	0	#DIV/0!	Ssa13008322,Soluble inorganic,Pyrophosphatase
Ssa08022785	0	1.462	0.569	0.677	0.898	1.561	4.841	2.43333	3.59429	1.84571	3.965	2.866	1.831	2.88733	4.26489	-0.246804	Ssa08022785,-,-
Ssa10004604	19.627	13.361	14.018	15.6687	46.323	60.132	62.483	56.3127	3.59397	1.84558	38.173	42.438	33.031	37.8807	2.41761	0.571998	Ssa10004604,protein-L-isoaspartate O-methyltransferase,PCMT
Ssa02011418	24.373	24.003	17.089	21.8217	32.328	167.097	35.843	78.4227	3.5938	1.84551	0	0	0	0	0	#DIV/0!	Ssa02011418,Belongs to the cytochrome P450 family,p450
Ssa03013771	2.22	1.039	2.164	1.80767	7.629	10.526	1.314	6.48967	3.59008	1.84402	258.104	339.748	261.649	286.5	158.492	-5.46425	Ssa03013771,"Photosystem II (PSII) is a light-driven water plastoquinone oxidoreductase that uses light energy to abstract electrons from H(2)O, generating O(2) and a proton gradient subsequently used for ATP formation. It consists of a core antenna complex that captures photons, and an electron transfer chain that converts photonic excitation into a charge separation. The D1 D2 (PsbA PsbA) react…
Ssa03012656	10.438	10.174	12.322	10.978	29.806	36.251	52.048	39.3683	3.58611	1.84242	21.372	19.987	22.612	21.3237	1.9424	0.88458	Ssa03012656,GATA transcription factor,"ASXH,GATA,RPN13_C"
Ssa06018554	0.539	0.542	0.949	0.676667	3.492	2.439	1.345	2.42533	3.58424	1.84167	0.132	0.14	0.277	0.183	0.270443	3.72827	Ssa06018554,-,-
Ssa11006265	7.762	4.338	3.521	5.207	9.647	28.848	17.363	18.6193	3.57583	1.83828	98.023	113.23	118.58	109.944	21.1147	-2.5619	Ssa11006265,Caffeoylshikimate esterase-like,Hydrolase_4
Ssa10003374	0.529	0.74	0.532	0.600333	1.749	2.668	2.02	2.14567	3.57413	1.83759	161.008	180.519	216.942	186.156	310.088	-6.43894	Ssa10003374,"The light-harvesting complex (LHC) functions as a light receptor, it captures and delivers excitation energy to photosystems with which it is closely associated",Chloroa_b-bind
Ssa09025161	4.66	2.18	3.583	3.47433	16.217	13.504	7.517	12.4127	3.57268	1.83701	0.399	0.53	1.676	0.868333	0.249928	3.83742	Ssa09025161,acetyltransferase At3g50280-like,Transferase
Ssa01000802	7.428	3.211	6.777	5.80533	14.187	23.887	24.103	20.7257	3.57011	1.83597	104.456	117.574	130.25	117.427	20.2274	-2.50227	Ssa01000802,50S ribosomal protein 5,-
Ssa01002411	2.178	0.849	0.65	1.22567	2.698	1.97	8.456	4.37467	3.56921	1.83561	0.972	0.76	2.641	1.45767	1.18928	1.58551	Ssa01002411,rRNA N-glycosidase,RIP
Ssa07020005	0	0.061	0.036	0.0323333	0.019	0.11	0.217	0.115333	3.56701	1.83472	0.09	0.064	0.126	0.0933333	2.8866	0.305345	Ssa07020005,Cytochrome p450,p450
Ssa12007354	106.961	50.605	56.026	71.1973	194.516	252.538	312.735	253.263	3.5572	1.83074	50.526	51.913	31.413	44.6173	0.626671	2.50496	Ssa12007354,alpha-amylase subtilisin,Kunitz_legume
Ssa05017263	0.115	0.156	0.061	0.110667	0.682	0.313	0.185	0.393333	3.55422	1.82953	0.017	0.018	0.018	0.0176667	0.159639	4.47665	Ssa05017263,LRR receptor-like serine threonine-protein kinase,"LRRNT_2,LRR_1,LRR_8,Pkinase_Tyr"
Ssa06018747	3.05	3.506	3.39	3.31533	15.841	11.434	8.058	11.7777	3.55248	1.82883	3.616	2.767	4.77	3.71767	1.12136	1.66358	Ssa06018747,ABC transporter B family member,"ABC_membrane,ABC_tran"
Ssa08023747	14.176	6.938	13.407	11.507	39.145	71.211	12.211	40.8557	3.55051	1.82802	2.518	2.446	2.37	2.44467	0.21245	4.06283	Ssa08023747,Belongs to the protein kinase superfamily,Pkinase
Ssa10003135	1.063	0.51	0.68	0.751	1.207	2.711	4.08	2.666	3.54993	1.82779	2844.2	3283.86	3629	3252.35	4330.69	-10.2526	Ssa10003135,Photosystem I reaction center subunit II,PsaD
Ssa10003105	25.085	12.208	8.612	15.3017	43.858	64.189	54.909	54.3187	3.54985	1.82776	11.019	11.233	13.928	12.06	0.788149	2.17122	Ssa10003105,-,-
Ssa13008554	0.368	1.82	1.41	1.19933	5.068	2.234	5.46	4.254	3.54697	1.82659	9.774	9.136	13.992	10.9673	9.14452	-1.36632	Ssa13008554,Homeobox-leucine zipper protein GLABRA,"Homeobox,START"
Ssa09024177	8.472	6.996	7.934	7.80067	21.106	36.58	25.256	27.6473	3.54423	1.82547	14.665	14.092	16.45	15.069	1.93176	0.875557	Ssa09024177,Reactive mitochondrial oxygen species modulator 1,Romo1
Ssa07021486	2.024	0.572	1.781	1.459	3.277	7.095	5.137	5.16967	3.54329	1.82509	1.209	0.791	0.683	0.894333	0.612977	2.53119	Ssa07021486,-,-
Ssa10003589	1.405	1.605	1.306	1.43867	6.894	4.513	3.88	5.09567	3.54194	1.82454	0.743	0.605	1.072	0.806667	0.560704	2.65923	Ssa10003589,E3 ubiquitin-protein ligase,WD40
Ssa09024992	4.548	3.424	3.663	3.87833	11.256	17.321	12.626	13.7343	3.5413	1.82428	2.072	3.153	2.62	2.615	0.674259	2.3929	Ssa09024992,Protein kinase C conserved region 2 (CalB),C2
Ssa12007836	5.96	8.455	10.807	8.40733	38.235	35.234	15.822	29.7637	3.5402	1.82383	0.962	0.767	0.477	0.735333	0.0874633	5.33901	Ssa12007836,Belongs to the multi antimicrobial extrusion (MATE) (TC 2.A.66.1) family,MatE
Ssa08023425	4.515	1.727	1.135	2.459	9.181	3.306	13.629	8.70533	3.54019	1.82383	302.493	351.733	317.775	324	131.761	-5.21795	Ssa08023425,F-box protein SKIP16-like,"DUF525,UVR"
Ssa08022104	0.717	36.154	1.324	12.7317	88.26	39.214	7.733	45.069	3.53991	1.82371	0	0.056	0	0.0186667	0.00146616	11.2375	Ssa08022104,nicotianamine,NAS
Ssa11006405	22.573	11.965	11.916	15.4847	55.099	60.675	48.644	54.806	3.53937	1.82349	29.403	28.499	35.187	31.0297	2.0039	0.820686	Ssa11006405,aminoacylase activity,"M20_dimer,Peptidase_M20"
Ssa07020688	24.122	18.282	25.708	22.704	61.54	105.805	73.583	80.3093	3.53723	1.82262	33.61	33.998	29.971	32.5263	1.43263	1.30396	Ssa07020688,protein phosphatase 2C 27,PP2C
Ssa02011043	0.357	0.122	0.4	0.293	1.607	0.823	0.677	1.03567	3.5347	1.82159	0	0	0	0	0	#DIV/0!	Ssa02011043,Belongs to the glycosyl hydrolase 32 family,"DUF3357,Glyco_hydro_32C,Glyco_hydro_32N"
Ssa05015919	6.405	4.148	6.011	5.52133	12.461	41.632	4.425	19.506	3.53284	1.82083	0.691	1.635	1.12	1.14867	0.208042	4.08589	Ssa05015919,Protein kinase PINOID-like,Pkinase
Ssa10003416	1.597	0.401	0	0.666	1.354	0.722	4.977	2.351	3.53003	1.81968	1.565	0.416	3.287	1.756	2.63664	0.420982	Ssa10003416,-,-
Ssa03012277	86.306	25.38	45.515	52.4003	80.571	264.436	209.681	184.896	3.52853	1.81907	59.178	64.921	38.589	54.2293	1.0349	1.76957	Ssa03012277,Chaperone protein DNAj,DnaJ
Ssa09025829	0.786	0.641	0.403	0.61	4.543	1.599	0.315	2.15233	3.52842	1.81902	0	0	0	0	0	#DIV/0!	Ssa09025829,Transcription factor,Myb_DNA-binding
Ssa02010155	0.562	1.691	0	0.751	1.948	3.301	2.7	2.64967	3.52818	1.81893	4.334	6.581	6.717	5.87733	7.82601	-1.14935	Ssa02010155,-,-
Ssa10003948	0.387	0.097	0.227	0.237	0.566	1.632	0.31	0.836	3.52743	1.81862	6.207	5.942	4.576	5.575	23.5232	-2.7374	Ssa10003948,PPIases accelerate the folding of proteins. It catalyzes the cis-trans isomerization of proline imidic peptide bonds in oligopeptides,Pro_isomerase
Ssa02011509	0.717	36.262	1.324	12.7677	87.995	39.214	7.772	44.9937	3.52403	1.81723	0	0.056	0	0.0186667	0.00146203	11.235	Ssa02011509,nicotianamine,NAS
Ssa02011187	15.616	3.36	3.803	7.593	11.349	52.838	16.014	26.7337	3.52083	1.81592	0.307	0.109	0	0.138667	0.0182624	7.59089	Ssa02011187,Sigma factor binding protein,VQ
Ssa08022420	15.616	3.36	3.803	7.593	11.284	52.838	16.014	26.712	3.51798	1.81475	0.307	0.109	0	0.138667	0.0182624	7.58972	Ssa08022420,Sigma factor binding protein,VQ
Ssa08023336	0.867	0.576	1.077	0.84	3.466	3.136	2.261	2.95433	3.51706	1.81437	0	0.08	0	0.0266667	0.031746	6.79165	Ssa08023336,belongs to the protein kinase superfamily,Pkinase_Tyr
Ssa06019119	7.632	3.776	6.906	6.10467	11.899	18.143	34.361	21.4677	3.5166	1.81418	6.892	13.458	3.197	7.849	1.28574	1.45158	Ssa06019119,DUF3700,DUF3700
Ssa06018634	3.416	5.637	5.116	4.723	28.235	16.368	5.203	16.602	3.51514	1.81358	7.48	6.246	4.767	6.16433	1.30517	1.42934	Ssa06018634,Cystinosin homolog,PQ-loop
Ssa08022963	1.364	3.784	1.768	2.30533	10.077	5.811	8.418	8.102	3.51446	1.8133	0.343	0.252	0.166	0.253667	0.110035	4.99727	Ssa08022963,AP2-like ethylene-responsive transcription factor,AP2
Ssa13008648	9.403	9.285	8.521	9.06967	40.155	19.912	35.554	31.8737	3.51432	1.81324	23.966	23.932	21.944	23.2807	2.56687	0.453233	Ssa13008648,Belongs to the protein kinase superfamily,"Pkinase,Pkinase_Tyr"
Ssa05016129	2.345	0.461	0.449	1.085	2.075	1.845	7.517	3.81233	3.51367	1.81298	0.075	0.159	0	0.078	0.0718894	5.61106	Ssa05016129,NAC transcription factor,NAM
Ssa06017727	3.303	6.098	7.802	5.73433	17.681	30.2	12.52	20.1337	3.51107	1.81191	0.665	0.353	0.279	0.432333	0.0753938	5.54132	Ssa06017727,Belongs to the glycosyl hydrolase 28 family,Glyco_hydro_28
Ssa04015068	1.012	0.381	0.223	0.538667	1.053	4.348	0.27	1.89033	3.50928	1.81118	3.906	3.954	0.976	2.94533	5.46782	-0.63979	Ssa04015068,-,-
Ssa13008420	1.722	1.167	1.818	1.569	5.178	8.568	2.76	5.502	3.50669	1.81011	1.899	2.826	1.994	2.23967	1.42745	1.29667	Ssa13008420,-,-
Ssa02010721	0.285	0.143	0.292	0.24	1.448	0.772	0.304	0.841333	3.50556	1.80964	13.776	13.9	12.156	13.2773	55.3222	-3.98014	Ssa02010721,transcription factor,HLH
Ssa06018912	0.801	3.858	5.072	3.24367	13.33	6.372	14.371	11.3577	3.50149	1.80797	106.762	94.954	104.787	102.168	31.4976	-3.1692	Ssa06018912,CAS1 domain-containing protein 1-like,Cas1_AcylT
Ssa03013671	9.403	9.285	8.719	9.13567	40.103	20.065	35.765	31.9777	3.50031	1.80748	24.339	24.064	21.987	23.4633	2.56832	0.446657	Ssa03013671,Belongs to the protein kinase superfamily,"Pkinase,Pkinase_Tyr"
Ssa02011874	5.732	3.008	6.724	5.15467	11.327	34.718	8.073	18.0393	3.49961	1.80719	0.255	0.407	0	0.220667	0.0428091	6.35313	Ssa02011874,-,-
Ssa06017605	6.385	2.692	2.303	3.79333	8.475	8.489	22.853	13.2723	3.49886	1.80688	15.865	15.963	15.127	15.6517	4.1261	-0.237894	Ssa06017605,ARID/BRIGHT DNA binding domain,ARID
Ssa05017145	2.163	1.243	1.453	1.61967	6.925	4.686	5.383	5.66467	3.49743	1.80629	10.547	11.61	12.126	11.4277	7.05557	-1.01247	Ssa05017145,Cinnamyl alcohol dehydrogenase,"ADH_N,ADH_zinc_N"
Ssa03013052	1.166	1.248	1.512	1.30867	4.456	3.33	5.933	4.573	3.4944	1.80504	3.203	3.5	4.262	3.655	2.79292	0.32327	Ssa03013052,Growth-regulating factor,"QLQ,WRC"
Ssa02010603	1.548	1.134	2.208	1.63	3.482	9.382	4.201	5.68833	3.48978	1.80313	0.092	0.065	0.097	0.0846667	0.0519427	6.07007	Ssa02010603,Belongs to the UDP-glycosyltransferase family,UDPGT
Ssa02010715	8.427	7.302	8.234	7.98767	18.84	38.76	25.947	27.849	3.4865	1.80178	13.728	11.811	13.104	12.881	1.61261	1.11238	Ssa02010715,BTB POZ domain-containing protein,-
Ssa08021973	0.459	0.968	0.848	0.758333	3.651	1.889	2.391	2.64367	3.48615	1.80164	84.748	69.451	58.042	70.747	93.2927	-4.74206	Ssa08021973,spa1-related,"Pkinase,WD40"
Ssa10003009	3.337	0.646	1.761	1.91467	3.792	10.519	5.704	6.67167	3.48451	1.80095	41.766	57.276	37.519	45.5203	23.7745	-2.77039	Ssa10003009,"Contains the following InterPro domains Zinc finger, C2H2-like (InterPro IPR015880), Zinc finger, C2H2-type (InterPro IPR007087)",-
Ssa09025510	1.417	0.142	0.499	0.686	2.053	2.392	2.725	2.39	3.48397	1.80073	14.928	15.866	14.068	14.954	21.7988	-2.64545	Ssa09025510,Belongs to the peroxisomal membrane protein PXMP2 4 family,Mpv17_PMP22
Ssa06017490	3.811	1.163	3.896	2.95667	7.383	15.65	7.868	10.3003	3.48377	1.80065	205.558	217.427	206.811	209.932	71.0029	-4.34916	Ssa06017490,Rubredoxin,Rubredoxin
Ssa01001474	3.859	2.749	3.395	3.33433	13.024	7.17	14.654	11.616	3.48375	1.80064	18.632	22.003	21.532	20.7223	6.21484	-0.835073	Ssa01001474,Plant-specific domain TIGR01615 family protein,PDDEXK_6
Ssa01001698	0.907	0.965	0.47	0.780667	4.394	3.476	0.285	2.71833	3.48207	1.79994	0	0	0	0	0	#DIV/0!	Ssa01001698,pectinesterase,Pectinesterase
Ssa01000498	15.536	5.003	4.117	8.21867	4.069	77.704	4.05	28.6077	3.48082	1.79943	0.275	0.292	0.144	0.237	0.0288368	6.91537	Ssa01000498,Germin-like protein subfamily 1 member,Cupin_1
Ssa04014401	40.618	44.396	44.422	43.1453	127.489	161.63	161.061	150.06	3.47801	1.79826	71.068	79.335	61.751	70.718	1.63906	1.08539	Ssa04014401,Acyl-coenzyme A oxidase 4,"Acyl-CoA_dh_1,Acyl-CoA_dh_M,Acyl-CoA_dh_N"
Ssa05016501	10.503	6.45	7.356	8.103	19.524	30.342	34.645	28.1703	3.47653	1.79765	94.898	108.189	93.642	98.9097	12.2065	-1.81193	Ssa05016501,Isochorismatase family,Isochorismatase
Ssa01000492	17.127	7.329	3.952	9.46933	4.198	88.539	5.999	32.912	3.47564	1.79728	0.413	0.585	0.217	0.405	0.0427696	6.34455	Ssa01000492,Germin-like protein subfamily 1 member,Cupin_1
Ssa05016883	0.257	0.271	0.181	0.236333	1.117	0.139	1.207	0.821	3.47391	1.79656	2.568	3.933	2.458	2.98633	12.6361	-1.86292	Ssa05016883,Trihelix transcription factor,Myb_DNA-bind_4
Ssa09024728	1.5	1.223	1.319	1.34733	4.45	5.652	3.939	4.68033	3.47378	1.7965	15.342	9.178	5.401	9.97367	7.40252	-1.09151	Ssa09024728,-,-
Ssa07021574	6.923	8.074	8.121	7.706	4.834	57.822	17.62	26.7587	3.47245	1.79595	12.173	16.331	22.835	17.113	2.22074	0.644914	Ssa07021574,calcium-binding protein,"EF-hand_1,EF-hand_5"
Ssa07019999	0.144	0.543	0.508	0.398333	1.402	1.436	1.311	1.383	3.47197	1.79575	0.743	0.789	1.002	0.844667	2.1205	0.711347	Ssa07019999,"transposition, RNA-mediated","Retrotran_gag_2,Retrotran_gag_3,Retrotrans_gag,gag_pre-integrs,zf-CCHC"
Ssa02010145	10.601	5.765	4.249	6.87167	8.28	45.917	17.367	23.8547	3.47145	1.79554	190.585	146.881	119.626	152.364	22.1728	-2.67518	Ssa02010145,RNA binding,-
Ssa02010519	0.431	0.422	0.797	0.55	1.397	2.849	1.475	1.907	3.46727	1.7938	1.396	1.517	0.966	1.293	2.35091	0.560583	Ssa02010519,Amino acid permease,Aa_trans
Ssa06017590	0.555	0.348	0.163	0.355333	0.064	2.05	1.582	1.232	3.46717	1.79376	0	0	0.036	0.012	0.0337711	6.68182	Ssa06017590,Calmodulin-binding protein,Calmodulin_bind
Ssa08022906	30.645	34.012	43.768	36.1417	115.035	147.039	113.636	125.237	3.46516	1.79292	40.665	46.33	58.046	48.347	1.33771	1.37316	Ssa08022906,Transmembrane protein 230-like,DUF872
Ssa02010957	1.225	0.776	1.304	1.10167	2.623	4.489	4.338	3.81667	3.46445	1.79263	54.439	58.816	78.736	63.997	58.0911	-4.06762	Ssa02010957,-,-
Ssa12006961	10.282	8.203	8.148	8.87767	20.092	37.875	34.266	30.7443	3.46311	1.79207	254.682	270.418	191.063	238.721	26.8901	-2.95693	Ssa12006961,Protein THYLAKOID FORMATION1,ThylakoidFormat
Ssa04014334	0.785	1.912	2.112	1.603	5.85	4.092	6.683	5.54167	3.45706	1.78955	0.068	0.072	0.249	0.129667	0.08089	5.41744	Ssa04014334,phosphatase 2C,PP2C
Ssa01001035	15.929	16.188	13.622	15.2463	48.425	56.418	53.079	52.6407	3.45268	1.78772	2.457	1.044	2.923	2.14133	0.140449	4.6196	Ssa01001035,-,-
Ssa06017703	22.123	5.267	8.157	11.849	27.459	48.697	46.403	40.853	3.4478	1.78568	743.171	953.936	1092.62	929.908	78.4799	-4.50857	Ssa06017703,Calvin cycle protein,CP12
Ssa04015585	1.155	0.217	1.524	0.965333	3.071	4.439	2.467	3.32567	3.4451	1.78454	0	0.451	0	0.150333	0.155732	4.46741	Ssa04015585,-,-
Ssa07021412	2.977	2.305	2.469	2.58367	7.552	7.153	11.994	8.89967	3.44459	1.78433	0.188	0.066	0.197	0.150333	0.058186	5.88751	Ssa07021412,Transcription factor that specifically binds AT-rich DNA sequences related to the nuclear matrix attachment regions (MARs),DUF296
Ssa06017779	20.325	18.519	16.53	18.458	63.193	56.075	71.442	63.57	3.44404	1.7841	22.726	22.686	29.92	25.1107	1.36042	1.34005	Ssa06017779,May serve as docking site to facilitate the association of other proteins to the plasma membrane,Rad60-SLD_2
Ssa03012467	0.732	0.551	2.576	1.28633	3.882	3.487	5.918	4.429	3.44312	1.78372	7.21	7.32	1.017	5.18233	4.02876	-0.226621	Ssa03012467,transcription factor,HLH
Ssa08022027	43.025	47.064	39.623	43.2373	147.903	186.522	112.148	148.858	3.4428	1.78358	14.584	11.845	11.863	12.764	0.295208	3.54378	Ssa08022027,Phosphoenolpyruvate carboxylase,PEPcase
Ssa02011591	42.919	47.048	39.623	43.1967	147.785	186.484	111.82	148.696	3.44231	1.78338	13.635	11.828	11.748	12.4037	0.287144	3.58353	Ssa02011591,Phosphoenolpyruvate carboxylase,PEPcase
Ssa10003160	0	0.064	0.025	0.0296667	0.156	0	0.15	0.102	3.4382	1.78165	0.849	0.506	0.587	0.647333	21.8202	-2.66594	Ssa10003160,Pentatricopeptide repeat-containing protein,"DYW_deaminase,PPR"
Ssa07021669	521.746	265.08	424.821	403.882	536.395	3049.25	579.172	1388.27	3.43732	1.78128	359.939	477.456	322.85	386.748	0.957577	1.84382	Ssa07021669,Cytochrome b5,Cyt-b5
Ssa02011645	0.459	0.968	0.868	0.765	3.62	1.889	2.379	2.62933	3.43704	1.78117	84.697	69.415	57.954	70.6887	92.4035	-4.74871	Ssa02011645,spa1-related,"Pkinase,WD40"
Ssa10003142	0.148	1.484	1.56	1.064	3.988	2.718	4.264	3.65667	3.43672	1.78103	0.471	0.462	0.722	0.551667	0.518484	2.72866	Ssa10003142,CRAL/TRIO domain,CRAL_TRIO
Ssa08022948	0.021	0	0	0.007	0.03	0.019	0.023	0.024	3.42857	1.77761	1.169	1.091	1.277	1.179	168.429	-5.61839	Ssa08022948,Villin-4-like,"Gelsolin,VHP"
Ssa11006337	14.695	11.793	6.294	10.9273	25.396	16.963	70.033	37.464	3.42847	1.77756	38.093	47.889	41.93	42.6373	3.9019	-0.186612	Ssa11006337,Required for the assembly of the V0 complex of the vacuolar ATPase (V-ATPase) in the endoplasmic reticulum,VMA21
Ssa01000204	0.238	0.471	0.341	0.35	1.543	1.563	0.493	1.19967	3.42762	1.77721	0.219	2.281	0.115	0.871667	2.49048	0.460785	Ssa01000204,-,-
Ssa10004035	16.621	15.951	18.184	16.9187	45.682	54.366	73.837	57.9617	3.4259	1.77648	3.165	4.575	3.256	3.66533	0.216644	3.98308	Ssa10004035,Heme oxygenase 1,Heme_oxygenase
Ssa06019305	1.035	3.695	5.815	3.515	14.311	7.729	14.052	12.0307	3.42266	1.77512	125.294	118.013	30.784	91.3637	25.9925	-2.9249	Ssa06019305,Belongs to the UDP-glycosyltransferase family,UDPGT
Ssa08022651	0.438	1.092	1.493	1.00767	0.924	2.401	7.017	3.44733	3.4211	1.77446	2.293	1.839	2.872	2.33467	2.3169	0.562264	Ssa08022651,Belongs to the glycosyltransferase 2 family,Cellulose_synt
Ssa11005825	0.585	4.964	2.811	2.78667	10.332	2.34	15.925	9.53233	3.42069	1.77429	4.962	3.656	2.656	3.758	1.34856	1.34286	Ssa11005825,alpha-amylase 3,"Alpha-amyl_C2,Alpha-amylase"
Ssa08022168	31.286	25.966	30.197	29.1497	89.598	91.755	117.485	99.6127	3.41728	1.77285	328.079	367.671	300.939	332.23	11.3974	-1.73778	Ssa08022168,"Thiosulfate 3-mercaptopyruvate sulfurtransferase 1, mitochondrial-like",Rhodanese
Ssa07020292	6.688	3.33	5.6	5.206	10.826	16.976	25.529	17.777	3.41471	1.77176	977.908	1154.22	825.14	985.757	189.35	-5.79315	Ssa07020292,-,-
Ssa03014151	28.617	20.892	34.534	28.0143	110.438	102.392	73.751	95.527	3.40993	1.76974	0	0	0	0	0	#DIV/0!	Ssa03014151,21 kDa protein-like,PMEI
Ssa01001921	2.411	2.118	0.707	1.74533	3.253	6.543	8.051	5.949	3.40852	1.76914	12.703	10.99	14.576	12.7563	7.30882	-1.10049	Ssa01001921,-,-
Ssa03013051	19.848	6.584	4.152	10.1947	25.997	27.618	50.568	34.7277	3.40645	1.76827	81.727	75.476	70.908	76.037	7.45851	-1.13062	Ssa03013051,cadmium-induced protein,-
Ssa09025885	4.099	0.812	4.366	3.09233	14.268	10.732	6.569	10.523	3.40293	1.76678	0	0	0	0	0	#DIV/0!	Ssa09025885,Bifunctional dihydroflavonol 4-reductase flavanone,Epimerase
Ssa12007219	1.5	3.179	1.515	2.06467	9.89	2.16	9.02	7.02333	3.40168	1.76625	25.356	24.91	19.675	23.3137	11.2917	-1.73095	Ssa12007219,NAC domain-containing protein,NAM
Ssa02011445	31.503	26.17	30.102	29.2583	89.799	91.51	117.05	99.453	3.39913	1.76517	350.44	368.899	297.884	339.074	11.589	-1.76951	Ssa02011445,"Thiosulfate 3-mercaptopyruvate sulfurtransferase 1, mitochondrial-like",Rhodanese
Ssa08022929	1.987	1.838	1.099	1.64133	5.908	5.751	5.065	5.57467	3.39643	1.76402	54.841	56.468	68.262	59.857	36.4685	-3.42456	Ssa08022929,Protein CHLOROPLAST IMPORT APPARATUS 2-like,CCT
Ssa08022193	19.836	25.214	19.266	21.4387	32.862	150.648	34.698	72.736	3.39275	1.76245	0	0	0	0	0	#DIV/0!	Ssa08022193,Belongs to the cytochrome P450 family,p450
Ssa08023235	0.784	1.334	1.484	1.20067	5.468	4.838	1.911	4.07233	3.39173	1.76202	0.451	0.333	0.592	0.458667	0.38201	3.15034	Ssa08023235,Belongs to the cation transport ATPase (P-type) (TC 3.A.3) family. Type IV subfamily,"Cation_ATPase,E1-E2_ATPase,Hydrolase,PhoLip_ATPase_C,PhoLip_ATPase_N"
Ssa02010176	46.366	49.659	56.793	50.9393	166.954	184.73	166.193	172.626	3.38885	1.7608	0.441	0.104	0.874	0.473	0.00928556	8.51159	Ssa02010176,Cytidine deaminase,"dCMP_cyt_deam_1,dCMP_cyt_deam_2"
Ssa02009958	58.486	111.069	178.957	116.171	278.814	629.145	272.178	393.379	3.38622	1.75967	1.522	1.375	0.16	1.019	0.00877158	8.59262	Ssa02009958,Belongs to the Casparian strip membrane proteins (CASP) family,DUF588
Ssa07021144	27.922	63.833	54.097	48.6173	167.928	78.985	246.845	164.586	3.38534	1.7593	269.366	239.736	181.871	230.324	4.73749	-0.484825	Ssa07021144,phosphatase 2c,PP2C
Ssa05016055	4.392	6.9	6.154	5.81533	29.239	12.947	16.858	19.6813	3.38439	1.75889	0.917	0.805	1.59	1.104	0.189843	4.15602	Ssa05016055,ATP phosphoribosyltransferase,"HisG,HisG_C"
Ssa03013775	2.968	2.189	3.5	2.88567	6.929	13.734	8.608	9.757	3.38119	1.75753	1.262	1.215	0.452	0.976333	0.338339	3.32099	Ssa03013775,lysine-specific demethylase,"JmjC,zf-4CXXC_R1"
Ssa06019444	3.792	2.549	0.834	2.39167	3.946	2.695	17.581	8.074	3.37589	1.75527	8.164	12.275	6.166	8.86833	3.70801	-0.135379	Ssa06019444,-,-
Ssa04015100	3.784	1.306	2.497	2.529	9.26	11.122	5.222	8.53467	3.37472	1.75477	0	0	0	0	0	#DIV/0!	Ssa04015100,-,-
Ssa10004186	6.435	5.563	8.876	6.958	16.46	26.728	27.245	23.4777	3.3742	1.75454	22.483	30.165	19.924	24.1907	3.47667	-0.0431615	Ssa10004186,"Zinc finger, C3HC4 type (RING finger)","zf-C3HC4_3,zf-RING_2"
Ssa06019401	0.449	0.15	0.175	0.258	0.83	0.902	0.879	0.870333	3.37339	1.7542	0.403	0.662	0.192	0.419	1.62403	1.05462	Ssa06019401,DnaJ homolog subfamily B member,"DnaJ,DnaJ_C"
Ssa11005072	6.512	13.162	9.438	9.704	43.226	34.223	20.745	32.7313	3.37297	1.75402	0.025	0.08	0.079	0.0613333	0.00632042	9.05979	Ssa11005072,Indole-3-acetic acid-amido synthetase,GH3
Ssa13008962	20.934	17.411	19.15	19.165	72.368	61.751	59.705	64.608	3.37115	1.75324	14.713	13.618	28.558	18.963	0.98946	1.76853	Ssa13008962,Belongs to the class-III pyridoxal-phosphate-dependent aminotransferase family,Aminotran_3
Ssa10004850	7.19	3.734	3.417	4.78033	8.944	24.741	14.658	16.1143	3.37096	1.75316	220.107	244.978	238.847	234.644	49.0853	-3.86406	Ssa10004850,Protein of unknown function (DUF1118),DUF1118
Ssa12006778	8.117	1.375	1.071	3.521	11.168	13.582	10.841	11.8637	3.3694	1.75249	0.298	0.951	1.096	0.781667	0.222001	3.92385	Ssa12006778,-,-
Ssa01000497	6.458	4.369	4.035	4.954	3.289	43.084	3.7	16.691	3.3692	1.7524	0	0	0	0	0	#DIV/0!	Ssa01000497,Germin-like protein subfamily 1 member,Cupin_1
Ssa01000268	0.946	0.712	0.277	0.645	3.719	1.283	1.516	2.17267	3.36848	1.7521	0	0	0	0	0	#DIV/0!	Ssa01000268,-,-
Ssa05017304	0.276	0.415	0.162	0.284333	1.403	0.831	0.638	0.957333	3.36694	1.75144	0.135	0	0	0.045	0.158265	4.41102	Ssa05017304,B-box zinc finger protein 20-like,zf-B_box
Ssa01000302	31.214	17.998	24.465	24.559	136.127	46.635	65.302	82.688	3.36691	1.75143	22.212	20.739	29.164	24.0383	0.978799	1.78234	Ssa01000302,WD40-like Beta Propeller Repeat,"DPPIV_N,PD40"
Ssa01002315	1.59	0.832	2.526	1.64933	0.163	16.42	0.071	5.55133	3.3658	1.75095	0	0	0	0	0	#DIV/0!	Ssa01002315,Tryptophan aminotransferase-related protein,"Alliinase_C,EGF_alliinase"
Ssa01002383	0.272	0.102	0.199	0.191	0.923	0.738	0.266	0.642333	3.363	1.74975	0.267	0.496	0.665	0.476	2.49215	0.432361	Ssa01002383,Cell division cycle,"ANAPC4_WD40,WD40"
Ssa10003768	1.88	1.901	0.989	1.59	3.964	2.05	10.014	5.34267	3.36017	1.74853	0.84	0.533	0.484	0.619	0.389308	3.10955	Ssa10003768,cadmium zinc-transporting ATPase,"E1-E2_ATPase,HMA,Hydrolase"
Ssa03013495	2.224	1.137	1.398	1.58633	5.584	4.67	5.729	5.32767	3.35848	1.74781	12.556	12.041	14.039	12.8787	8.11851	-1.27341	Ssa03013495,Peptidyl-prolyl cis-trans isomerase,FKBP_C
Ssa04015144	3.71	7.284	6.218	5.73733	16.037	8.19	33.579	19.2687	3.35847	1.7478	27.86	20.534	10.192	19.5287	3.40379	-0.0193367	Ssa04015144,-,-
Ssa02010305	5.912	2.226	1.734	3.29067	3.099	11.942	18.108	11.0497	3.35788	1.74755	17.674	25.56	10.494	17.9093	5.44246	-0.696709	Ssa02010305,-,-
Ssa04015750	25.538	31.526	31.05	29.3713	134.885	44.708	116.282	98.625	3.35787	1.74754	26.266	32.712	37.216	32.0647	1.0917	1.62097	Ssa04015750,E3 ubiquitin-protein ligase,"zf-RING_2,zf-rbx1"
Ssa01002028	0.997	2.017	0.877	1.297	5.791	2.648	4.626	4.355	3.35775	1.74749	0	0.097	0	0.0323333	0.0249293	7.07351	Ssa01002028,Protein of unknown function (DUF789),DUF789
Ssa10004136	0	0.329	0.077	0.135333	0.808	0.158	0.397	0.454333	3.35714	1.74723	1.895	0.546	0.809	1.08333	8.00493	-1.25365	Ssa10004136,F-box only protein,F-box
Ssa01002667	0.102	0.334	0.12	0.185333	1.311	0.062	0.493	0.622	3.35612	1.74679	40.454	39.099	29.947	36.5	196.942	-5.87484	Ssa01002667,Nodulin-like,"MFS_1,Nodulin-like"
Ssa10003123	2.904	1.157	1.653	1.90467	6.912	3.321	8.942	6.39167	3.35579	1.74665	9.479	8.407	5.206	7.69733	4.0413	-0.268167	Ssa10003123,-,-
Ssa10003703	9.47	9.626	15.116	11.404	27.029	43.498	44.266	38.2643	3.35534	1.74646	43.858	41.857	31.112	38.9423	3.4148	-0.0253391	Ssa10003703,Acetyltransferase (GNAT) domain,"Acetyltransf_1,Acetyltransf_10"
Ssa05016494	1827.91	916.448	716.786	1153.71	1865.61	2213.66	7528.56	3869.28	3.35376	1.74578	3743.45	3837.32	4169.58	3916.78	3.39494	-0.0176059	Ssa05016494,Dormancy/auxin associated protein,Auxin_repressed
Ssa08023335	20.311	27.695	17.707	21.9043	85.289	40.004	95.056	73.4497	3.3532	1.74554	26.086	27.291	28.206	27.1943	1.2415	1.43345	Ssa08023335,F-box kelch-repeat protein,"F-box,Kelch_1"
Ssa11005507	2.263	3.279	4.208	3.25	11.355	17.765	3.558	10.8927	3.35159	1.74485	9.448	8.474	7.941	8.621	2.65262	0.33743	Ssa11005507,Belongs to the multi antimicrobial extrusion (MATE) (TC 2.A.66.1) family,MatE
Ssa11005603	2.989	3.818	2.066	2.95767	11.108	6.565	12.061	9.91133	3.35107	1.74462	1.138	0.751	2.43	1.43967	0.486758	2.78334	Ssa11005603,transcription factor,Myb_DNA-binding
Ssa06019275	5.1	3.101	3.192	3.79767	7.483	18.271	12.364	12.706	3.34574	1.74232	17.806	15.707	15.438	16.317	4.29659	-0.360866	Ssa06019275,ycf20-like,DUF565
Ssa01000711	1.058	0.166	0.698	0.640667	3.037	3.109	0.283	2.143	3.34495	1.74199	0	0	0	0	0	#DIV/0!	Ssa01000711,Spermidine hydroxycinnamoyl,Transferase
Ssa11006434	3.763	3.504	5.661	4.30933	12.445	21.795	8.982	14.4073	3.34329	1.74127	2.201	1.597	1.874	1.89067	0.438738	2.92984	Ssa11006434,lysine-specific demethylase,"JmjC,zf-4CXXC_R1"
Ssa02011419	20.537	24.873	18.177	21.1957	31.107	146.471	34.984	70.854	3.34285	1.74108	0	0	0	0	0	#DIV/0!	Ssa02011419,Belongs to the cytochrome P450 family,p450
Ssa09023933	1.148	0.545	1.34	1.011	0.704	5.351	4.081	3.37867	3.34191	1.74067	14.241	12.171	17.281	14.5643	14.4059	-2.10791	Ssa09023933,"Plant lipoxygenase may be involved in a number of diverse aspects of plant physiology including growth and development, pest resistance, and senescence or responses to wounding","Lipoxygenase,PLAT"
Ssa06018271	0.383	0.385	0.393	0.387	2.126	1.617	0.136	1.293	3.34109	1.74032	0.235	0.549	1.38	0.721333	1.86391	0.841984	Ssa06018271,Transcription factor,"Myb_CC_LHEQLE,Myb_DNA-binding"
Ssa08022700	3.876	5.337	5.53	4.91433	16.197	9.632	23.353	16.394	3.33596	1.7381	2.13	1.2	1.617	1.649	0.335549	3.3135	Ssa08022700,-,-
Ssa04014769	51.65	46.563	68.008	55.407	160.113	268.632	125.632	184.792	3.33518	1.73776	3.616	2.288	2.802	2.902	0.0523761	5.99271	Ssa04014769,"RuBisCO catalyzes two reactions the carboxylation of D- ribulose 1,5-bisphosphate, the primary event in carbon dioxide fixation, as well as the oxidative fragmentation of the pentose substrate. Both reactions occur simultaneously and in competition at the same active site",RuBisCO_small
Ssa09023908	23.676	10.732	13.783	16.0637	37.589	80.861	42.223	53.5577	3.33409	1.73729	107.372	121.388	94.356	107.705	6.7049	-1.00792	Ssa09023908,Protein LHCP TRANSLOCATION,-
Ssa11006198	17.723	12.255	15.593	15.1903	29.385	77.53	45.02	50.645	3.33403	1.73727	1301.41	1242.73	893.28	1145.81	75.4299	-4.4998	Ssa11006198,"Ferredoxin-thioredoxin reductase, variable",FeThRed_A
Ssa03013460	3.068	2.803	3.12	2.997	18.434	7.233	4.299	9.98867	3.33289	1.73677	1.202	1.277	1.223	1.234	0.411745	3.01695	Ssa03013460,Protein of unknown function (DUF632),"DUF630,DUF632"
Ssa03012653	3.884	1.493	2.763	2.71333	0.344	26.386	0.397	9.04233	3.33256	1.73663	0	0	0	0	0	#DIV/0!	Ssa03012653,Belongs to the expansin family,"DPBB_1,Pollen_allerg_1"
Ssa03012814	6.412	0.396	1.757	2.855	7.923	12.453	8.142	9.506	3.3296	1.73535	0	0	0	0	0	#DIV/0!	Ssa03012814,LURP-one-related,LOR
Ssa04014862	15.414	19.607	24.499	19.84	66.139	91.699	40.206	66.0147	3.32735	1.73437	21.458	20.214	24.373	22.015	1.10963	1.5843	Ssa04014862,Belongs to the cytochrome P450 family,p450
Ssa13008854	3.068	2.784	3.12	2.99067	18.516	7.256	4.071	9.94767	3.32624	1.73389	1.183	1.277	1.203	1.221	0.40827	3.02629	Ssa13008854,Protein of unknown function (DUF632),"DUF630,DUF632"
Ssa05016572	92.198	39.364	192.264	107.942	151.583	761.25	163.847	358.893	3.32487	1.7333	2.723	3.706	3.794	3.40767	0.0315694	6.71863	Ssa05016572,Belongs to the TPP enzyme family,"TPP_enzyme_C,TPP_enzyme_M,TPP_enzyme_N"
Ssa05016465	7.837	4.863	6.137	6.279	16.25	25.002	21.346	20.866	3.32314	1.73255	6.141	6.93	6.646	6.57233	1.04672	1.66668	Ssa05016465,E3 ubiquitin-protein ligase,zf-C3HC4
Ssa13008374	3.77	2.065	2.895	2.91	7.989	10.726	10.29	9.66833	3.32245	1.73225	2.671	3.749	4.496	3.63867	1.2504	1.40986	Ssa13008374,Protein FLUORESCENT IN BLUE LIGHT,TPR_12
Ssa03012865	35.394	51.259	48.415	45.0227	150.309	171.626	126.696	149.544	3.32152	1.73184	3.039	1.615	3.09	2.58133	0.0573341	5.85631	Ssa03012865,Fk506-binding protein,HMA
Ssa07019816	3.747	4.204	2.571	3.50733	16.878	8.201	9.848	11.6423	3.31943	1.73093	3.223	2.108	3.007	2.77933	0.792435	2.06657	Ssa07019816,Belongs to the GRAS family,GRAS
Ssa11006244	20.609	6.139	8.468	11.7387	36.397	15.465	65.029	38.9637	3.31926	1.73086	2515.89	3534.96	2109.32	2720.06	231.718	-6.12536	Ssa11006244,Thiosulfate sulfurtransferase 16,Rhodanese
Ssa02011010	4.181	4.984	3.269	4.14467	17.481	11.29	12.5	13.757	3.31921	1.73084	0.085	0	0.269	0.118	0.0284703	6.86524	Ssa02011010,Phosphate-induced protein 1 conserved region,Phi_1
Ssa09024220	3.049	2.168	1.341	2.186	7.05	6.281	8.415	7.24867	3.31595	1.72942	0	0	0	0	0	#DIV/0!	Ssa09024220,-,-
Ssa09024961	2.894	1.906	3.5	2.76667	6.97	4.253	16.295	9.17267	3.31542	1.72919	12.585	14.035	10.141	12.2537	4.42904	-0.4178	Ssa09024961,RING-H2 finger protein,zf-RING_2
Ssa06018887	0.757	0.436	0.627	0.606667	1.442	3.184	1.404	2.01	3.31319	1.72822	14.51	14.551	16.126	15.0623	24.828	-2.90568	Ssa06018887,Protein of unknown function (DUF616),DUF616
Ssa05017356	1.92	1.307	1.43	1.55233	7.686	7.248	0.493	5.14233	3.31265	1.72798	0.054	0.029	0.171	0.0846667	0.0545416	5.92449	Ssa05017356,"Endo-1,4-beta-xylanase",Glyco_hydro_10
Ssa07020708	88.38	42.139	46.679	59.066	94.588	236.778	255.4	195.589	3.31136	1.72742	264.362	329.579	224.689	272.877	4.61986	-0.480426	Ssa07020708,Belongs to the small heat shock protein (HSP20) family,HSP20
Ssa08023701	0.692	2.687	1.827	1.73533	9.483	1.638	6.117	5.746	3.31118	1.72735	319.102	202.979	152.462	224.848	129.57	-5.29025	Ssa08023701,aarF domain-containing protein kinase At1g79600,ABC1
Ssa12007188	0.177	1.73	1.088	0.998333	1.879	2.557	5.475	3.30367	3.30918	1.72647	12.729	12.562	10.499	11.93	11.9499	-1.85245	Ssa12007188,Methionine gamma-lyase,Met_gamma_lyase
Ssa01001486	0.114	0.344	0.854	0.437333	1.03	1.756	1.555	1.447	3.30869	1.72626	0.042	0.089	0	0.0436667	0.0998476	5.05039	Ssa01001486,ankyrin repeat-containing protein,"Ank_2,PGG"
Ssa08023604	0.395	0.085	0.298	0.259333	1.828	0.562	0.181	0.857	3.30463	1.72449	0.789	0.662	0.392	0.614333	2.36889	0.480274	Ssa08023604,-,-
Ssa05016768	0.221	0.416	0.194	0.277	0.869	0.4	1.476	0.915	3.30325	1.72389	11.29	11.524	12.747	11.8537	42.793	-3.69542	Ssa05016768,-,-
Ssa01001147	0.778	4.685	4.551	3.338	13.634	10.799	8.643	11.0253	3.30298	1.72377	0.658	1.307	0.63	0.865	0.259137	3.67198	Ssa01001147,Trihelix transcription factor,Myb_DNA-bind_4
Ssa02010670	18.118	8.654	7.671	11.481	29.825	27.601	56.288	37.9047	3.30151	1.72313	0	0.044	0	0.0146667	0.00127747	11.3356	Ssa02010670,Belongs to the peroxidase family. Classical plant (class III) peroxidase subfamily,peroxidase
Ssa12007538	1.43	1.356	0.978	1.25467	4.409	3.688	4.329	4.142	3.30128	1.72302	0.506	0.952	1.308	0.922	0.734857	2.16749	Ssa12007538,-,-
Ssa09025952	9.486	4.273	4.173	5.97733	15.041	41.441	2.669	19.717	3.29863	1.72187	0.062	0.265	0.392	0.239667	0.0400959	6.36227	Ssa09025952,At1g76070-like,-
Ssa13008264	29.321	15.218	35.313	26.6173	61.35	126.157	75.883	87.7967	3.29848	1.7218	29.296	29.803	30.096	29.7317	1.117	1.56217	Ssa13008264,-,-
Ssa06019207	4.144	4.723	3.153	4.00667	11.965	8.56	19.116	13.2137	3.29792	1.72156	11.115	13.782	6.828	10.575	2.63935	0.321373	Ssa06019207,RING-type E3 ubiquitin transferase,U-box
Ssa10002950	0.725	0.879	0.957	0.853667	2.235	3.023	3.184	2.814	3.29637	1.72088	4.47	5.506	4.972	4.98267	5.83678	-0.824296	Ssa10002950,Pentatricopeptide repeat-containing protein,"PPR,PPR_2,PPR_3"
Ssa08023475	5.777	3.102	3.138	4.00567	3.09	5.816	30.7	13.202	3.29583	1.72064	1.514	2.433	1.589	1.84533	0.460681	2.8388	Ssa08023475,Pectate lyase,Pec_lyase_C
Ssa13009177	0.204	0.768	0.269	0.413667	1.226	0.738	2.124	1.36267	3.29412	1.71989	46.175	48.996	45.09	46.7537	113.023	-5.10057	Ssa13009177,-,DUF688
Ssa02009838	0.42	0.063	0.074	0.185667	0.039	0	1.795	0.611333	3.29264	1.71924	0.617	0.853	0.583	0.684333	3.68582	-0.16274	Ssa02009838,Heavy-metal-associated domain,HMA
Ssa05016173	2.138	0.426	2.102	1.55533	7.473	4.549	3.325	5.11567	3.28911	1.7177	3.836	4.175	3.396	3.80233	2.44471	0.428037	Ssa05016173,Alpha/beta hydrolase family,"Abhydrolase_1,Abhydrolase_6"
Ssa12006659	44.876	43.699	62.639	50.4047	130.51	255.62	111.104	165.745	3.28828	1.71733	37.905	31.352	43.954	37.737	0.748681	2.13491	Ssa12006659,-,-
Ssa02010818	0.08	0.15	0.316	0.182	0.258	0.216	1.321	0.598333	3.28755	1.71701	0.059	0.093	0.031	0.061	0.335165	3.29407	Ssa02010818,Amino acid permease,Aa_trans
Ssa02010392	0.233	0.088	0.068	0.129667	0.341	0.211	0.726	0.426	3.28535	1.71605	0.342	0.425	0.12	0.295667	2.28021	0.526882	Ssa02010392,2OG-Fe(II) oxygenase superfamily,2OG-FeII_Oxy_2
Ssa04014884	51.271	39.526	44.839	45.212	99.458	159.144	186.951	148.518	3.28492	1.71586	155.974	152.342	143.579	150.632	3.33167	-0.0203905	Ssa04014884,Uric acid degradation bifunctional protein,"OHCU_decarbox,Transthyretin"
Ssa01000374	0.294	0.857	1.002	0.717667	2.191	4.485	0.392	2.356	3.28286	1.71495	0	0.029	0.028	0.019	0.0264747	6.9542	Ssa01000374,pectinesterase,"PMEI,Pectinesterase"
Ssa12007500	1.477	0.139	0.487	0.701	2.135	2.004	2.762	2.30033	3.2815	1.71436	471.683	518.774	416.225	468.894	668.893	-7.67128	Ssa12007500,-,-
Ssa01001357	0.5	0.094	0.33	0.308	1.214	1.017	0.801	1.01067	3.28139	1.7143	0.551	0.683	0.772	0.668667	2.171	0.595948	Ssa01001357,Plant self-incompatibility protein S1,Self-incomp_S1
Ssa11004916	0.386	0.194	0.113	0.231	0.594	0.581	1.098	0.757667	3.27994	1.71367	0.142	0.552	0.297	0.330333	1.43001	1.19764	Ssa11004916,Transcriptional activator that specifically binds 5'- GATA-3' or 5'-GAT-3' motifs within gene promoters,GATA
Ssa03014134	2.207	2.748	2.464	2.473	8.714	6.217	9.385	8.10533	3.27753	1.71261	9.015	8.753	15.391	11.053	4.46947	-0.447495	Ssa03014134,EamA-like transporter family,EamA
Ssa05016687	21.491	14.833	19.024	18.4493	110.71	29.276	41.316	60.434	3.27567	1.71179	733.441	736.872	699.831	723.381	39.2091	-3.58132	Ssa05016687,Belongs to the PdxS SNZ family,SOR_SNZ
Ssa09025695	274.916	247.621	261.774	261.437	489.288	810.703	1263.98	854.658	3.26908	1.70888	231.374	197.004	253.641	227.34	0.869577	1.9105	Ssa09025695,Aminotransferase class I and II,Aminotran_1_2
Ssa11006417	7.705	9.483	11.037	9.40833	27.181	30.776	34.14	30.699	3.26296	1.70618	17.608	17.094	13.225	15.9757	1.69803	0.942316	Ssa11006417,Leucine Rich repeat,LRR_6
Ssa10004484	25.468	7.853	7.149	13.49	1.066	3.839	126.918	43.941	3.2573	1.70368	78.989	95.701	136.923	103.871	7.69985	-1.24115	Ssa10004484,-,-
Ssa13008153	0.248	0.886	0.817	0.650333	3.723	1.176	1.455	2.118	3.25679	1.70345	1.183	1.5	0.526	1.06967	1.6448	0.985541	Ssa13008153,Clavaminate synthase-like protein,TauD
Ssa01001173	1.382	1.127	0.81	1.10633	3.142	3.541	4.121	3.60133	3.2552	1.70275	0.677	0.27	0.355	0.434	0.392287	3.05276	Ssa01001173,Homeobox-leucine zipper protein,"HALZ,Homeobox"
Ssa07020867	0.462	0.522	0.542	0.508667	2.388	1.673	0.906	1.65567	3.25491	1.70262	8.666	10.776	3.627	7.68967	15.1173	-2.21551	Ssa07020867,Belongs to the cytochrome P450 family,p450
Ssa02009811	56.912	46.262	59.451	54.2083	140.36	213.729	175.159	176.416	3.25441	1.70239	236.665	271.313	192.282	233.42	4.30598	-0.403947	Ssa02009811,isoform X1,DUF760
Ssa01001581	0.125	0.563	0.384	0.357333	2.046	1.24	0.2	1.162	3.25187	1.70127	0	0	0	0	0	#DIV/0!	Ssa01001581,"Removal of H(2)O(2), oxidation of toxic reductants, biosynthesis and degradation of lignin, suberization, auxin catabolism, response to environmental stresses such as wounding, pathogen attack and oxidative stress",peroxidase
Ssa03012724	0.25	0.376	0.137	0.254333	0.202	1.778	0.5	0.826667	3.25033	1.70059	55.061	61.348	27.541	47.9833	188.663	-5.85908	Ssa03012724,Belongs to the glycosyl hydrolase 32 family,"DUF3357,Glyco_hydro_32C,Glyco_hydro_32N"
Ssa03014043	0.47	1.203	0.62	0.764333	2.718	0.808	3.918	2.48133	3.2464	1.69884	2.626	2.13	2.757	2.50433	3.27649	-0.013311	Ssa03014043,f-box protein,"DUF295,F-box,F-box-like"
Ssa13009344	14.361	9.134	9.323	10.9393	29.146	15.637	61.747	35.51	3.24608	1.6987	44.073	35.73	28.729	36.1773	3.30709	-0.0268607	Ssa13009344,expressed protein,-
Ssa01000442	2.5	0.565	0.22	1.095	2.312	4.408	3.939	3.553	3.24475	1.69811	3.124	4.296	2.797	3.40567	3.1102	0.0611005	Ssa01000442,-,-
Ssa08023470	4.355	1.093	0.715	2.05433	5.183	3.151	11.662	6.66533	3.24452	1.69801	0	0	0.09	0.03	0.0146033	7.79557	Ssa08023470,"WD domain, G-beta repeat",WD40
Ssa09024309	18.26	5.612	9.836	11.236	21.457	60.33	27.572	36.453	3.2443	1.69791	1090.56	1003.6	2240.82	1444.99	128.604	-5.30888	Ssa09024309,Photosystem II 5 kDa protein,-
Ssa13009183	1.537	1.543	2.649	1.90967	5.539	12.976	0.068	6.19433	3.24367	1.69763	0	0	0	0	0	#DIV/0!	Ssa13009183,Belongs to the peroxidase family. Classical plant (class III) peroxidase subfamily,peroxidase
Ssa10004141	38.25	62.818	80.13	60.3993	228.529	226.233	132.853	195.872	3.24294	1.6973	12.043	11.221	13.589	12.2843	0.203385	3.99502	Ssa10004141,Glucuronoxylan 4-O-methyltransferase,Polysacc_synt_4
Ssa02009606	9.384	8.243	6.807	8.14467	17.854	16.155	45.203	26.404	3.24188	1.69683	97.117	112.415	105.573	105.035	12.8962	-1.99204	Ssa02009606,-,-
Ssa06019790	0.991	3.968	4.161	3.04	15.145	8.882	5.511	9.846	3.23882	1.69547	90.003	111.741	97.126	99.6233	32.7708	-3.33887	Ssa06019790,Belongs to the peptidase A1 family,"TAXi_C,TAXi_N"
Ssa10003147	84.562	73.708	73.955	77.4083	268.085	200.726	283.063	250.625	3.2377	1.69497	506.768	516.11	393.238	472.039	6.09803	-0.913377	Ssa10003147,Belongs to the cysteine synthase cystathionine beta- synthase family,PALP
Ssa08022003	0.392	0.222	0.259	0.291	2.117	0.621	0.087	0.941667	3.23597	1.6942	0.024	0	0.025	0.0163333	0.0561283	5.84933	Ssa08022003,-,-
Ssa10004494	0.051	0	0	0.017	0	0.138	0.027	0.055	3.23529	1.6939	0	0	0	0	0	#DIV/0!	Ssa10004494,Floricaula leafy homolog,"C_LFY_FLO,LFY_SAM"
Ssa12006929	0.597	1.321	1.708	1.20867	3.073	5.808	2.832	3.90433	3.23028	1.69166	1.153	1.079	2.823	1.685	1.3941	1.21233	Ssa12006929,Belongs to the NPH3 family,"BTB,NPH3"
[truncated: 21,612 more rows]

## Sheet: Root nodule-Leaflet
id	Root R1	Root R2	Root R3	Root average	Root nodule R1	Root nodule R2	Root nodule R3	Root nodule average	Root nodule/Root	Log2(Root nodule/Root）	Leaflet T2 R1	Leaflet T2 R2	Leaflet T2 R3	Leaflet T2 Average	Leaflet/Root	description
Ssa02010359	0.566	0	0.05	0.205333	5.996	9.166	7.713	7.625	37.1347	5.2147	28514.8	29746.1	35240.8	31167.3	151789	Ssa02010359,"RuBisCO catalyzes two reactions the carboxylation of D- ribulose 1,5-bisphosphate, the primary event in carbon dioxide fixation, as well as the oxidative fragmentation of the pentose substrate. Both reactions occur simultaneously and in competition at the same active site","RbcS,RuBisCO_small"
Ssa06019465	0	0	0.038	0.0126667	0.139	0.35	0.046	0.178333	14.0789	3.81547	496.853	581.324	384.456	487.544	38490.3	Ssa06019465,Cytochrome p450,p450
Ssa09025959	0.098	0.073	0	0.057	0.135	0.53	0.104	0.256333	4.49708	2.16899	1481.56	1329.41	1588.16	1466.38	25725.9	Ssa09025959,Ganglioside-induced differentiation-associated protein,CRAL_TRIO_2
Ssa12006523	0	0.033	0	0.011	0.061	0.06	0.071	0.064	5.81818	2.54057	173.576	124.561	150.465	149.534	13594	Ssa12006523,"Plant lipoxygenase may be involved in a number of diverse aspects of plant physiology including growth and development, pest resistance, and senescence or responses to wounding","Lipoxygenase,PLAT"
Ssa09024608	0.253	0.286	0.445	0.328	2.34	6.179	1.96	3.493	10.6494	3.4127	3660.28	3816.51	5304.5	4260.43	12989.1	Ssa09024608,Photosystem I reaction center subunit V,PSI_PSAK
Ssa07020666	0.364	0.183	0	0.182333	0.28	0.548	1.62	0.816	4.47532	2.16199	1634.69	1737.49	3682.33	2351.5	12896.7	Ssa07020666,Participates in electron transfer between P700 and the cytochrome b6-f complex in photosystem I,Copper-bind
Ssa03014179	0.473	0	0.277	0.25	2.917	9.696	3.032	5.215	20.86	4.38267	2491.34	2569.77	3762.71	2941.27	11765.1	Ssa03014179,Photosystem I reaction center subunit psaK,PSI_PSAK
Ssa03014212	0.033	0	0.058	0.0303333	0.167	0.148	0.682	0.332333	10.956	3.45366	317.315	271.203	202.89	263.803	8696.79	Ssa03014212,Pentatricopeptide repeat-containing protein At5g13770,"PPR,PPR_2"
Ssa01002617	0.5	0.125	0.147	0.257333	5.818	15.9	2.359	8.02567	31.1878	4.96291	960.165	798.973	2561.49	1440.21	5596.67	Ssa01002617,"The light-harvesting complex (LHC) functions as a light receptor, it captures and delivers excitation energy to photosystems with which it is closely associated",Chloroa_b-bind
Ssa01000460	0.24	0.407	0.423	0.356667	8.256	1.413	0.45	3.373	9.45701	3.24138	1061.83	1336.53	2646.24	1681.53	4714.57	Ssa01000460,Reversible hydration of carbon dioxide,Pro_CA
Ssa03012471	0	0.034	0	0.0113333	0	0.124	0.049	0.0576667	5.08824	2.34717	63.958	73.897	11.625	49.8267	4396.47	Ssa03012471,Acetyltransferase,Transferase
Ssa06019309	0	0.031	0.037	0.0226667	0.058	0.038	0.31	0.135333	5.97059	2.57787	95.921	62.011	65.22	74.384	3281.65	Ssa06019309,Belongs to the UDP-glycosyltransferase family,UDPGT
Ssa04014484	0.536	0.293	0.428	0.419	50.254	46.321	46.111	47.562	113.513	6.82672	1012.12	1112.11	855.951	993.392	2370.86	Ssa04014484,Belongs to the FBPase class 1 family,FBPase
Ssa06017422	0.953	0.144	0.923	0.673333	0.617	14.916	4.431	6.65467	9.88317	3.30497	1436.1	1409.39	1709.32	1518.27	2254.86	Ssa06017422,Photosystem I reaction center subunit XI,PsaL
Ssa06018860	0.333	0.125	0.244	0.234	0.771	0.854	1.78	1.135	4.85043	2.27811	516.923	435.701	545.445	499.356	2134	Ssa06018860,Zinc finger protein CONSTANS-like,"CCT,zf-B_box"
Ssa03013463	0	0.029	0.034	0.021	1.784	2.573	0.25	1.53567	73.127	6.19233	39.156	37.841	46.037	41.0113	1952.92	Ssa03013463,Transcription factor,HLH
Ssa13008851	0	0.029	0.034	0.021	1.748	2.608	0.25	1.53533	73.1111	6.19202	39.214	37.659	46.097	40.99	1951.9	Ssa13008851,Transcription factor,HLH
Ssa13009294	0	0	0.035	0.0116667	2.751	1.817	3.843	2.80367	240.314	7.90878	17.962	18.933	24.377	20.424	1750.63	Ssa13009294,Glycerol-3-phosphate 2-O-acyltransferase,"Acyltransferase,HAD"
Ssa09024342	0	0	0.196	0.0653333	1.339	1.41	1.547	1.432	21.9184	4.45407	92.693	133.676	91.635	106.001	1622.47	Ssa09024342,Thylakoid soluble phosphoprotein TSP9,TSP9
Ssa06018414	0.959	0.608	1.022	0.863	3.782	3.287	4.423	3.83067	4.43878	2.15016	1062.31	916.23	1635.45	1204.66	1395.9	Ssa06018414,Magnesium-protoporphyrin IX monomethyl ester oxidative cyclase,Rubrerythrin
Ssa05015909	0.034	0.026	0	0.02	0.048	0.124	0.11	0.094	4.7	2.23266	33.42	28.265	19.559	27.0813	1354.07	Ssa05015909,cationic amino acid transporter,"AA_permease_2,AA_permease_C"
Ssa10003073	0	0.036	0	0.012	0.175	0	0.506	0.227	18.9167	4.24159	16.459	13.646	17.899	16.0013	1333.44	Ssa10003073,F-box kelch-repeat protein,"F-box,FBA_1,FBA_3"
Ssa13009036	0.186	0	0.055	0.0803333	12.868	11.965	24.022	16.285	202.718	7.66333	109.165	121.362	84.692	105.073	1307.96	Ssa13009036,"quinone-oxidoreductase homolog, chloroplastic","ADH_N,ADH_zinc_N_2"
Ssa04015346	0.43	0.324	0	0.251333	38.579	35.908	32.081	35.5227	141.337	7.14299	231.69	225.194	299.967	252.284	1003.78	Ssa04015346,Photosystem I reaction center subunit,PSI_PsaH
Ssa06018073	0.288	0.619	0.614	0.507	32.198	13.374	5.88	17.1507	33.8277	5.08014	474.314	503.633	521.037	499.661	985.525	Ssa06018073,Belongs to the UDP-glycosyltransferase family,UDPGT
Ssa03013796	0.2	0.376	0.176	0.250667	0.555	2.261	2.243	1.68633	6.72739	2.75005	201.012	206.689	223.905	210.535	839.902	Ssa03013796,psbQ-like protein 1,PsbQ
Ssa03012759	0.037	0	0	0.0123333	0.12	0.101	0.059	0.0933333	7.56757	2.91983	13.051	9.585	8.409	10.3483	839.054	Ssa03012759,S-type anion channel,SLAC1
Ssa05017329	0.223	0	0	0.0743333	2.37	0.403	7.617	3.46333	46.5919	5.54201	69.274	59.528	57.25	62.0173	834.314	Ssa05017329,auxin-induced protein,Auxin_inducible
Ssa03014000	0.211	0.106	0.186	0.167667	1.984	1.463	3.794	2.41367	14.3956	3.84756	142.087	112.176	134.999	129.754	773.881	Ssa03014000,Protein NRT1 PTR FAMILY,PTR2
Ssa09024871	0.938	0.326	0.635	0.633	5.908	8.942	3.778	6.20933	9.80937	3.29416	457.412	444.539	565.564	489.172	772.783	Ssa09024871,"The light-harvesting complex (LHC) functions as a light receptor, it captures and delivers excitation energy to photosystems with which it is closely associated",Chloroa_b-bind
Ssa01002586	0	0	0.049	0.0163333	7.355	6.23	4.906	6.16367	377.367	8.55983	10.703	11.507	13.829	12.013	735.49	Ssa01002586,Glycosyltransferase family 10 (fucosyltransferase) C-term,Glyco_transf_10
Ssa02009564	0.092	0	0	0.0306667	0.299	0.084	0.345	0.242667	7.91304	2.98423	12.284	20.486	31.135	21.3017	694.62	Ssa02009564,membrane-associated kinase regulator,-
Ssa08022609	0.209	0.157	0.23	0.198667	1.451	0.851	1.564	1.28867	6.48658	2.69746	131.795	139.708	131.336	134.28	675.904	Ssa08022609,Ribosomal protein S1-like RNA-binding domain,S1
Ssa04015345	0.038	0.085	0.033	0.052	10.317	11.129	13.47	11.6387	223.821	7.8062	26.138	26.689	34.139	28.9887	557.474	Ssa04015345,guanine nucleotide exchange factor,PRONE
Ssa12007809	2.54	3.736	2.806	3.02733	13.904	6.678	26.063	15.5483	5.13598	2.36064	1759.81	1663.22	1437.05	1620.03	535.133	Ssa12007809,Belongs to the universal ribosomal protein uL1 family,Ribosomal_L1
Ssa04015503	0	0.03	0.071	0.0336667	0.261	0.401	0.043	0.235	6.9802	2.80327	15.956	15.509	21.577	17.6807	525.168	Ssa04015503,ankyrin repeat-containing protein,"Ank,Ank_2,Ank_3,Ank_4,PGG"
Ssa12006616	0.271	0.146	0.408	0.275	15.256	10.388	10.557	12.067	43.88	5.45549	158.627	153.577	95.349	135.851	494.004	Ssa12006616,riboflavin biosynthesis protein,"DHBP_synthase,GTP_cyclohydro2"
Ssa06018598	0	0.409	0.119	0.176	0.879	0.368	1.45	0.899	5.10795	2.35275	71.941	63.099	123.392	86.144	489.455	Ssa06018598,Sulfite oxidase-like,"Mo-co_dimer,Oxidored_molyb"
Ssa11005657	0.174	0.296	0.192	0.220667	1.049	1.183	2.982	1.738	7.87613	2.97749	95.273	110.526	103.281	103.027	466.888	Ssa11005657,UDP-glycosyltransferase 89A2-like,UDPGT
Ssa12007051	0.138	0.311	0.363	0.270667	1.93	1.41	1.494	1.61133	5.9532	2.57367	132.499	103.818	141.609	125.975	465.426	Ssa12007051,transcription,Myb_DNA-binding
Ssa01001956	0.761	0.621	1.619	1.00033	8.745	7.002	18.915	11.554	11.5501	3.52984	463.802	520.557	411.777	465.379	465.224	Ssa01001956,Methylecgonone reductase-like,Aldo_ket_red
Ssa12006831	1.876	3.695	5.714	3.76167	23.097	49.085	31.151	34.4443	9.15667	3.19482	1294.25	1292	2651.77	1746.01	464.158	Ssa12006831,photosystem I subunit O,-
Ssa10003848	0.09	0.068	0	0.0526667	1.065	3.226	0.579	1.62333	30.8228	4.94593	25.023	21.41	22.227	22.8867	434.557	Ssa10003848,RING-H2 finger protein,zf-RING_2
Ssa09025110	1.638	1.835	2.004	1.82567	5.839	15.61	11.248	10.899	5.96987	2.5777	825.085	894.03	594.72	771.278	422.464	Ssa09025110,RNA polymerase sigma factor,"Sigma70_r2,Sigma70_r3,Sigma70_r4"
Ssa02010365	0.66	0.963	0.943	0.855333	4.272	5.707	8.922	6.30033	7.36594	2.88087	374.697	288.82	400.927	354.815	414.826	Ssa02010365,Rhomboid family,Rhomboid
Ssa09024624	1.343	0.674	0.394	0.803667	3.394	3.319	4.686	3.79967	4.72791	2.2412	207.315	267.961	439.073	304.783	379.241	Ssa09024624,NAD(P)H-quinone oxidoreductase subunit N,NdhN
Ssa02009752	0.029	0.066	0.102	0.0656667	1.266	0.448	0.264	0.659333	10.0406	3.32777	26.795	23.451	23.321	24.5223	373.437	Ssa02009752,ABC transporter G family member,"ABC2_membrane,ABC_tran"
Ssa12007125	0.508	0.319	0.149	0.325333	1.214	1.838	0.95	1.334	4.10041	2.03577	112.253	128.107	115.032	118.464	364.131	Ssa12007125,psbQ-like protein 2,PsbQ
Ssa02010475	0.289	0.109	0.381	0.259667	1.001	17.101	21.513	13.205	50.8537	5.66828	111.727	110.176	51.126	91.0097	350.487	Ssa02010475,-,-
Ssa11006165	0	0.033	0.038	0.0236667	0.12	0.156	0.139	0.138333	5.84507	2.54722	11.062	8.986	4.471	8.173	345.338	Ssa11006165,Belongs to the cytochrome P450 family,p450
Ssa10003365	0	0.262	0.917	0.393	20.082	16.181	54.652	30.305	77.112	6.26888	115.299	142.22	145.301	134.273	341.662	Ssa10003365,Adipocyte plasma membrane-associated,Str_synth
Ssa07021143	2.963	2.789	2.77	2.84067	26.295	37.019	75.027	46.1137	16.2334	4.02089	971.938	1069.85	859.684	967.158	340.469	Ssa07021143,Zinc finger protein CONSTANS-like,"CCT,zf-B_box"
Ssa01000912	0.622	0.647	0.691	0.653333	3.105	3.016	4.988	3.703	5.66786	2.5028	218.778	175.544	271.3	221.874	339.603	Ssa01000912,Magnesium-chelatase subunit ChlH,"CobN-Mg_chel,DUF3479"
Ssa13009148	0	0	0.029	0.00966667	0.349	0.327	0.228	0.301333	31.1724	4.9622	3.815	3.593	2.256	3.22133	333.241	Ssa13009148,receptor,"PA,cEGF"
Ssa01001111	1.534	0.21	3.68	1.808	12.381	19.042	13.035	14.8193	8.19653	3.03501	533.177	734.434	536.482	601.364	332.613	Ssa01001111,-,-
Ssa02010027	0.273	0.205	0.48	0.319333	54.693	44.828	45.94	48.487	151.838	7.24639	110.308	110.419	89.759	103.495	324.098	Ssa02010027,"This protein plays a role in synthesis of starch. It catalyzes the synthesis of the activated glycosyl donor, ADP- glucose from Glc-1-P and ATP",NTP_transferase
Ssa08023460	0.041	0.092	0.107	0.08	5.969	9.727	5.68	7.12533	89.0667	6.47681	22.257	25.526	28.063	25.282	316.025	Ssa08023460,Cytochrome p450,p450
Ssa01002800	2.023	2.2	1.621	1.948	12.223	14.269	26.388	17.6267	9.0486	3.17769	745.009	705.569	395.491	615.356	315.891	Ssa01002800,Domain of unknown function (DUF4336),DUF4336
Ssa13008401	0.289	0	0	0.0963333	0.401	0.609	0.154	0.388	4.02768	2.00995	11.53	9.397	69.282	30.0697	312.142	Ssa13008401,Auxin-binding protein,Cupin_1
Ssa02012008	0.682	0.656	0.733	0.690333	2.435	5.894	6.942	5.09033	7.37373	2.8824	275.768	247.6	115.688	213.019	308.574	Ssa02012008,Pheophorbide A oxygenase,"PaO,Rieske"
Ssa12006715	0.896	0.096	0.676	0.556	1.894	5.903	0.308	2.70167	4.85911	2.28069	112.036	142.22	256.954	170.403	306.481	Ssa12006715,Kiwellin-like,-
Ssa06017922	0.167	0.031	0.11	0.102667	16.017	14.111	8.402	12.8433	125.097	6.96691	31.056	26.667	29.245	28.9893	282.364	Ssa06017922,Tyrosine decarboxylase,Pyridoxal_deC
Ssa12007513	0.123	0.231	0.108	0.154	0.114	13.32	11.441	8.29167	53.842	5.75066	39.246	45.691	43.567	42.8347	278.147	Ssa12007513,P-loop nucleoside triphosphate hydrolase superfamily protein,AIG1
Ssa09024138	0.452	0	0	0.150667	2.021	0.954	2.979	1.98467	13.1726	3.71946	39.661	54.045	24.307	39.3377	261.091	Ssa09024138,-,-
Ssa13008885	0	0	0.127	0.0423333	0.1	1.175	0.116	0.463667	10.9528	3.45322	10.027	11.108	11.807	10.9807	259.386	Ssa13008885,2-alkenal reductase (NADP( )-dependent)-like,"ADH_N_2,ADH_zinc_N"
Ssa03013427	0	0	0.127	0.0423333	0.1	1.175	0.116	0.463667	10.9528	3.45322	9.974	11.221	11.64	10.945	258.543	Ssa03013427,2-alkenal reductase (NADP( )-dependent)-like,"ADH_N_2,ADH_zinc_N"
Ssa12006763	1.069	1.61	2.509	1.72933	10.798	8.704	8.926	9.476	5.47957	2.45406	521.111	463.968	319.225	434.768	251.408	Ssa12006763,magnesium transporter MRS2-11,CorA
Ssa02011652	4.338	2.368	2.958	3.22133	15.247	19.91	28.328	21.1617	6.56923	2.71572	701.917	719.582	992.277	804.592	249.77	Ssa02011652,Thioredoxin,Thioredoxin
Ssa08021966	4.338	2.45	3.053	3.28033	15.297	19.812	28.271	21.1267	6.4404	2.68715	702.794	719.244	993.281	805.106	245.434	Ssa08021966,Thioredoxin,Thioredoxin
Ssa11005620	0	0.177	0	0.059	22.662	10.441	21.395	18.166	307.898	8.26631	16.799	14.357	12.181	14.4457	244.842	Ssa11005620,-,-
Ssa08022076	0.218	0.066	0.038	0.107333	0.625	0.67	0.699	0.664667	6.19255	2.63053	29.428	24.463	22.076	25.3223	235.922	Ssa08022076,Belongs to the cytochrome P450 family,p450
Ssa11006298	3.258	3.087	3.699	3.348	11.666	24.431	20.551	18.8827	5.63998	2.49569	722.738	895.842	732.928	783.836	234.121	Ssa11006298,NADH dehydrogenase transmembrane subunit,NdhL
Ssa11005156	3.757	3.411	2.673	3.28033	62.699	110.224	99.751	90.8913	27.708	4.79223	680.682	641.353	922.365	748.133	228.066	Ssa11005156,CAAX protease self-immunity,Abi
Ssa02010384	0	0.191	0	0.0636667	0.351	0.687	0.27	0.436	6.84817	2.77572	26.041	10.28	6.639	14.32	224.921	Ssa02010384,-,-
Ssa09024781	0.306	0.307	0.09	0.234333	2.358	2.951	1.089	2.13267	9.101	3.18602	41.452	44.216	68.146	51.2713	218.797	Ssa09024781,Myb-like DNA-binding domain,Myb_DNA-binding
Ssa02011538	0.238	0.06	0.035	0.111	0.569	0.611	0.637	0.605667	5.45646	2.44796	29.141	22.375	20.599	24.0383	216.562	Ssa02011538,Belongs to the cytochrome P450 family,p450
Ssa05017191	0.065	0.147	0.114	0.108667	2.522	5.52	3.399	3.81367	35.0951	5.1332	23.96	25.567	20.193	23.24	213.865	Ssa05017191,La-related protein,La
Ssa12007315	0.111	0.189	0.098	0.132667	9.088	0.655	0.089	3.27733	24.7035	4.62664	37.148	29.05	14.799	26.999	203.51	Ssa12007315,synthase,"Terpene_synth,Terpene_synth_C"
Ssa13009035	0.772	0.931	1.133	0.945333	29.389	12.389	37.661	26.4797	28.0109	4.80792	208.473	208.012	148.79	188.425	199.321	Ssa13009035,Protein of unknown function (DUF760),DUF760
Ssa09024284	0.146	0.396	0.232	0.258	10.939	8.013	6.826	8.59267	33.3049	5.05766	60.611	53.842	39.599	51.3507	199.034	Ssa09024284,ABC transporter G family member,"ABC2_membrane,ABC_tran"
Ssa12007316	0.143	0.268	0.125	0.178667	12.133	0.935	0.114	4.394	24.5933	4.62019	48.292	37.429	18.76	34.827	194.927	Ssa12007316,synthase,"Terpene_synth,Terpene_synth_C"
Ssa10003010	0.065	0.049	0.028	0.0473333	27.869	9.093	38.149	25.037	528.951	9.04699	1.687	23.085	2.62	9.13067	192.901	Ssa10003010,Protein NRT1 PTR FAMILY 7.1-like,PTR2
Ssa05017190	0	0.084	0	0.028	0.721	0.504	0.476	0.567	20.25	4.33985	7.697	4.09	4.384	5.39033	192.512	Ssa05017190,Encoded by,Abhydrolase_3
Ssa09024159	5.512	2.046	1.571	3.043	8.653	18.748	12.401	13.2673	4.35995	2.12431	513.98	606.201	588.998	569.726	187.225	Ssa09024159,Oxygen-evolving enhancer protein 2,PsbP
Ssa08022251	0.174	0	0	0.058	0.08	3.299	5.289	2.88933	49.8161	5.63854	9.321	13.571	9.115	10.669	183.948	Ssa08022251,-,-
Ssa06018072	0	0	0.037	0.0123333	2.365	0.602	0.577	1.18133	95.7838	6.58171	2.537	2.339	1.797	2.22433	180.351	Ssa06018072,Belongs to the UDP-glycosyltransferase family,UDPGT
Ssa03014113	0.127	0.191	0	0.106	0.351	0.114	2.501	0.988667	9.32704	3.22142	12.277	18.089	25.385	18.5837	175.318	Ssa03014113,Chaperone protein,DnaJ
Ssa01002175	0.594	0.179	0.575	0.449333	4.533	5.158	12.314	7.335	16.3242	4.02894	79.482	81.134	72.345	77.6537	172.82	Ssa01002175,Transcription factor,TCP
Ssa13008602	0.048	0.073	0.213	0.111333	1.008	1.008	1.734	1.25	11.2275	3.48897	15.779	19.685	21.725	19.063	171.225	Ssa13008602,Belongs to the NPH3 family,NPH3
Ssa01002406	0.478	0.27	0.421	0.389667	2.128	4.107	0.287	2.174	5.57913	2.48004	62.331	76.985	60.823	66.713	171.205	Ssa01002406,"Photosystem II (PSII) is a light-driven water plastoquinone oxidoreductase that uses light energy to abstract electrons from H(2)O, generating O(2) and a proton gradient subsequently used for ATP formation. It consists of a core antenna complex that captures photons, and an electron transfer chain that converts photonic excitation into a charge separation. The D1 D2 (PsbA PsbA) react…
Ssa03013717	0.048	0.073	0.213	0.111333	1.008	1.008	1.786	1.26733	11.3832	3.50884	15.957	19.685	21.538	19.06	171.198	Ssa03013717,Belongs to the NPH3 family,NPH3
Ssa13009255	0	0	0.185	0.0616667	0.56	0.191	0.169	0.306667	4.97297	2.31411	7.049	6.833	16.508	10.13	164.27	Ssa13009255,Chlorophyll synthase,UbiA
Ssa01001265	0	0.06	0.211	0.0903333	4.221	0.652	2.908	2.59367	28.7122	4.84359	15.655	16.013	12.542	14.7367	163.137	Ssa01001265,-,DUF1685
Ssa01002668	0	0.05	0	0.0166667	0.122	0	0.088	0.07	4.2	2.07039	3.494	2.579	1.987	2.68667	161.2	Ssa01002668,Nodulin-like,"MFS_1,Nodulin-like"
Ssa04015099	0	0	0.265	0.0883333	0.558	0.545	0.322	0.475	5.37736	2.4269	12.851	16.72	12.56	14.0437	158.985	Ssa04015099,"One of the components of the core complex of photosystem II (PSII). It binds chlorophyll and helps catalyze the primary light-induced photochemical processes of PSII. PSII is a light- driven water plastoquinone oxidoreductase, using light energy to abstract electrons from H(2)O, generating O(2) and a proton gradient subsequently used for ATP formation",PSII
Ssa13009292	0.04	0	0	0.0133333	0.71	0.11	0.022	0.280667	21.05	4.39575	1.397	1.548	2.745	1.89667	142.25	Ssa13009292,Glycerol-3-phosphate 2-O-acyltransferase,"Acyltransferase,HAD"
Ssa02009994	8.586	8.62	7.92	8.37533	75.703	75.276	43.254	64.7443	7.73036	2.95054	1259.83	1270.39	1031.48	1187.23	141.754	Ssa02009994,glutamine synthetase,"Gln-synt_C,Gln-synt_N"
Ssa09024163	0.188	0.17	0.132	0.163333	0.747	0.781	0.561	0.696333	4.26327	2.09196	29.112	19.855	19.119	22.6953	138.951	Ssa09024163,transcription factor,HLH
Ssa06018653	1.13	0.122	0.142	0.464667	0.448	1.022	21.122	7.53067	16.2066	4.01851	55.996	78.554	52.183	62.2443	133.955	Ssa06018653,-,-
Ssa12007035	0.043	0.032	0.151	0.0753333	0.218	0.077	0.914	0.403	5.34956	2.41942	11.418	12.971	5.58	9.98967	132.606	Ssa12007035,O-acyltransferase (WSD1-like),"DUF1298,WES_acyltransf"
Ssa04014860	2.028	0.585	2.126	1.57967	34.104	21.894	31.464	29.154	18.4558	4.206	251.693	235.885	139.255	208.944	132.271	Ssa04014860,Belongs to the UDP-glycosyltransferase family,UDPGT
Ssa06017497	0.606	1.065	1.829	1.16667	11.295	5.483	8.374	8.384	7.18629	2.84525	182.689	161.96	106.953	150.534	129.029	Ssa06017497,Acyltransferase-like protein At1g54570,"DAGAT,Hydrolase_4"
Ssa06018550	0.077	0.407	0.747	0.410333	4.963	3.7	5.134	4.599	11.208	3.48645	54.705	54.463	43.429	50.8657	123.962	Ssa06018550,Transcription factor,HLH
Ssa10003866	0	0	0.254	0.0846667	9.345	14.36	9.715	11.14	131.575	7.03974	8.913	8.571	13.144	10.2093	120.583	Ssa10003866,-,-
Ssa01001032	0.469	0.997	0.607	0.691	7.744	7.859	7.471	7.69133	11.1307	3.47648	89.386	64.269	88.749	80.8013	116.934	Ssa01001032,ABC transporter G family member,"ABC2_membrane,ABC_tran"
Ssa06017491	1.831	0.639	2.082	1.51733	18.648	8.158	2.815	9.87367	6.50725	2.70205	175.647	154.935	178.879	169.82	111.92	Ssa06017491,Benzyl alcohol,Transferase
Ssa04014599	0.167	0.031	0.147	0.115	3.726	3.058	0.981	2.58833	22.5072	4.49232	15.619	17.383	5.186	12.7293	110.69	Ssa04014599,Belongs to the UDP-glycosyltransferase family,UDPGT
Ssa08023695	1.539	1.298	0.758	1.19833	4.526	4.954	5.064	4.848	4.04562	2.01636	125.239	117.094	147.814	130.049	108.525	Ssa08023695,-,-
Ssa01001747	0	0.391	0	0.130333	1.32	0	0.832	0.717333	5.50384	2.46044	22.123	9.324	9.41	13.619	104.494	Ssa01001747,-,-
Ssa09025221	0.209	0.276	0.138	0.207667	0.605	1.04	1.006	0.883667	4.25522	2.08923	18.257	20.017	25.944	21.406	103.079	Ssa09025221,-,DUF4378
Ssa07020293	0.494	0	0.543	0.345667	6.053	6.589	8.443	7.02833	20.3327	4.34573	37.848	38.2	29.823	35.2903	102.094	Ssa07020293,Belongs to the UPP synthase family,Prenyltransf
Ssa04015731	1.392	1.238	1.558	1.396	11.936	16.821	13.179	13.9787	10.0134	3.32386	62.034	70.478	293.002	141.838	101.603	Ssa04015731,Protein CURVATURE THYLAKOID 1A,CAAD
Ssa03014241	0.509	2.146	0.478	1.04433	4.771	4.113	3.734	4.206	4.02745	2.00987	143.308	94.648	61.749	99.9017	95.6607	Ssa03014241,ZINC FINGER protein,"zf-C2H2,zf-C2H2_jaz"
Ssa08022370	1.09	0.884	0.811	0.928333	2.791	4.549	5.15	4.16333	4.48474	2.16502	87.535	93.722	69.769	83.6753	90.135	Ssa08022370,-,-
Ssa05016518	0	0	0.116	0.0386667	0.459	0.239	0.283	0.327	8.4569	3.08013	3.354	3.668	3.367	3.463	89.5603	Ssa05016518,-,-
Ssa09024270	3.233	1.378	0.644	1.75167	2.116	9.269	56.342	22.5757	12.8881	3.68797	179.859	237.626	49.804	155.763	88.9227	Ssa09024270,cinnamoyl-CoA reductase 1-like,"3Beta_HSD,Epimerase"
Ssa05016438	0	0.076	0	0.0253333	0.046	0.636	0.054	0.245333	9.68421	3.27563	1.477	3.061	2.016	2.18467	86.2368	Ssa05016438,-,-
Ssa08022970	0.867	1.662	0.347	0.958667	27.051	33.225	29.268	29.848	31.1349	4.96046	65.54	70.582	110.779	82.3003	85.8487	Ssa08022970,-,-
Ssa09024734	5.871	2.09	1.878	3.27967	26.363	13.324	227.991	89.226	27.2058	4.76584	286.189	294.411	255.706	278.769	84.9991	Ssa09024734,Nudix hydrolase,NUDIX
Ssa02010045	4.707	3.601	2.404	3.57067	54.24	25.952	22.06	34.084	9.54556	3.25483	333.755	388.293	184.296	302.115	84.6102	Ssa02010045,Alpha/beta hydrolase family,"Abhydrolase_1,Abhydrolase_6"
Ssa01001467	0.6	0.979	0.352	0.643667	5.364	4.25	16.557	8.72367	13.5531	3.76055	39.688	59.757	56.863	52.1027	80.9467	Ssa01001467,Aux IAA proteins are short-lived transcriptional factors that function as repressors of early auxin response genes at low auxin concentrations,AUX_IAA
Ssa05016660	0	0.008	0.018	0.00866667	0.163	0.009	0.032	0.068	7.84615	2.97199	0.791	0.534	0.73	0.685	79.0385	Ssa05016660,Disease resistance protein,"LRR_8,NB-ARC"
Ssa06018263	0.387	0.291	0.227	0.301667	0.954	2.332	11.844	5.04333	16.7182	4.06335	25.395	35.954	9.848	23.7323	78.6707	Ssa06018263,18 kDa seed maturation,LEA_1
Ssa07020701	6.26	4.778	3.169	4.73567	28.556	13.341	126.487	56.128	11.8522	3.56708	415.5	457.82	238.378	370.566	78.25	Ssa07020701,PLATZ transcription factor,PLATZ
Ssa02010585	4.788	3.574	3.769	4.04367	20.628	23.02	30.693	24.7803	6.12818	2.61546	317.512	317.313	308.396	314.407	77.7529	Ssa02010585,Belongs to the UDP-glycosyltransferase family,UDPGT
Ssa06018931	0.207	0.468	0.583	0.419333	2.853	1.685	3.628	2.722	6.49126	2.6985	31.655	31.38	34.701	32.5787	77.6916	Ssa06018931,Belongs to the cytochrome P450 family,p450
Ssa06018876	0	0.102	0.089	0.0636667	0.72	0.673	2.24	1.211	19.0209	4.24952	6.837	4.836	3.08	4.91767	77.2408	Ssa06018876,9-cis-epoxycarotenoid dioxygenase,RPE65
Ssa06018178	0.176	0.331	0	0.169	14.32	28.641	8.271	17.0773	101.049	6.65892	16.425	14.02	8.621	13.022	77.0533	Ssa06018178,"Transcriptional repressor, ovate",Ovate
Ssa11005619	0.339	0.383	0.149	0.290333	5.64	14.707	9.773	10.04	34.5809	5.11191	24.157	21.836	19.608	21.867	75.3169	Ssa11005619,Belongs to the cytochrome P450 family,p450
Ssa09024778	3.399	1.89	2.3	2.52967	10.204	15.18	34.83	20.0713	7.93438	2.98812	198.173	230.314	108.499	178.995	70.7585	Ssa09024778,U-box domain-containing protein,Arm
Ssa09025635	0.651	0.245	0.572	0.489333	0.301	22.951	55.267	26.173	53.4871	5.74112	35.634	32.789	34.144	34.189	69.8685	Ssa09025635,Bet1-like protein,-
Ssa04015671	1.071	1.497	0.168	0.912	18.657	10.133	25.718	18.1693	19.9225	4.31633	65.102	52.85	72.297	63.4163	69.5355	Ssa04015671,Cytochrome p450,p450
Ssa01002216	2.296	1.153	1.496	1.64833	41.436	32.19	84.753	52.793	32.0281	5.00127	125.629	120.033	94.573	113.412	68.8038	Ssa01002216,UDP-Glycosyltransferase,UDPGT
Ssa02011429	0.057	0	0.1	0.0523333	0.84	0.308	0	0.382667	7.3121	2.87029	3.214	3.726	3.33	3.42333	65.414	Ssa02011429,Zinc transporter,Zip
Ssa08022182	0.057	0	0.1	0.0523333	0.84	0.257	0	0.365667	6.98726	2.80473	3.13	3.726	3.286	3.38067	64.5987	Ssa08022182,Zinc transporter,Zip
Ssa06018582	0.054	0.081	0	0.045	0.599	0.341	0.086	0.342	7.6	2.926	3.291	3.961	1.457	2.903	64.5111	Ssa06018582,-,-
Ssa05015940	0.403	0.607	0.414	0.474667	4.196	4.376	10.339	6.30367	13.2802	3.7312	15.857	17.693	57.667	30.4057	64.0569	Ssa05015940,mTERF,mTERF
Ssa01002380	0.459	0.23	0	0.229667	3.042	1.937	6.21	3.72967	16.2395	4.02143	13.717	15.655	12.63	14.0007	60.9608	Ssa01002380,-,-
Ssa10004164	1.025	0.865	1.148	1.01267	26.584	20.531	17.12	21.4117	21.1438	4.40217	71.247	60.22	53.394	61.6203	60.8496	Ssa10004164,Ankyrin repeats (3 copies),"Ank,Ank_2,Ank_4,Ank_5"
Ssa09024154	0.667	1.364	0.839	0.956667	1.719	7.846	5.958	5.17433	5.40871	2.43528	61.318	68.224	43.993	57.845	60.4652	Ssa09024154,AAA domain,"AAA_33,Ten1_2"
Ssa01002622	12.37	3.47	5.495	7.11167	140.782	187.293	124.942	151.006	21.2335	4.40827	409.565	469.266	385.454	421.428	59.2587	Ssa01002622,Caffeoylshikimate esterase-like,Hydrolase_4
Ssa10002945	1.395	1.576	1.496	1.489	5.667	4.851	9.062	6.52667	4.38325	2.132	86.04	88.414	86.084	86.846	58.3251	Ssa10002945,Belongs to the UDP-glycosyltransferase family,UDPGT
Ssa11006123	15.878	7.31	7.296	10.1613	54.348	57.075	43.814	51.7457	5.09241	2.34835	512.441	576.242	674.063	587.582	57.8253	Ssa11006123,cadmium-induced protein,-
Ssa01001350	0.298	1.821	0.851	0.99	10.356	3.364	4.173	5.96433	6.02458	2.59086	74.759	45.541	51.24	57.18	57.7576	Ssa01001350,Transcription factor,HLH
Ssa13009373	5.08	6.595	4.932	5.53567	27.87	45.313	26.577	33.2533	6.00711	2.58667	321.423	329.71	298.357	316.497	57.1741	Ssa13009373,High-light-induced protein,-
Ssa01001746	2.438	3.647	1.942	2.67567	22.524	17.047	40.416	26.6623	9.96474	3.31683	164.644	163.789	127.705	152.046	56.8255	Ssa01001746,Pentatricopeptide repeat-containing protein,"PPR,PPR_1,PPR_2,PPR_3,Pkinase"
Ssa11005176	0.035	0	0.03	0.0216667	1.521	0.939	0.166	0.875333	40.4	5.33628	0	3.679	0	1.22633	56.6	Ssa11005176,Protein NRT1 PTR FAMILY,PTR2
Ssa03013580	1.384	0.749	0.495	0.876	14.278	22.839	5.567	14.228	16.242	4.02166	51.971	55.472	38.408	48.617	55.4989	Ssa03013580,F-box kelch-repeat protein,"F-box,F-box-like,Kelch_3,Kelch_4,Kelch_5"
Ssa12007087	0.503	0.421	0.688	0.537333	15.807	5.657	5.31	8.92467	16.6092	4.05391	27.465	22.253	39.736	29.818	55.4926	Ssa12007087,ubiE/COQ5 methyltransferase family,"Methyltransf_11,Methyltransf_25"
Ssa13008734	1.384	0.814	0.495	0.897667	14.178	22.761	5.59	14.1763	15.7924	3.98116	53.02	56.013	39.075	49.3693	54.9974	Ssa13008734,F-box kelch-repeat protein,"F-box,F-box-like,Kelch_3,Kelch_4,Kelch_5"
Ssa03012928	28.817	12.399	16.029	19.0817	67.446	152.259	130.593	116.766	6.11928	2.61336	945.983	1094.59	1104.34	1048.3	54.9377	Ssa03012928,NAD(P)H dehydrogenase subunit S,NdhS
Ssa04014758	1.501	1.671	1.953	1.70833	11.441	11.748	9.38	10.8563	6.35493	2.66788	87.185	84.197	101.248	90.8767	53.1961	Ssa04014758,Alpha beta-Hydrolases superfamily protein,PGAP1
Ssa01001198	0.878	0.315	0.736	0.643	7.564	5.637	3.866	5.689	8.84759	3.14528	34.438	36.242	31.343	34.0077	52.8891	Ssa01001198,Belongs to the UDP-glycosyltransferase family,UDPGT
Ssa02009878	0.238	0.269	0.315	0.274	2.645	1.293	2.037	1.99167	7.26886	2.86173	21.023	12.755	9.472	14.4167	52.6156	Ssa02009878,RING-H2 finger protein,zf-RING_2
Ssa12007948	0.154	0.232	0.203	0.196333	1.318	0.279	1.729	1.10867	5.64686	2.49745	11.668	7.043	11.655	10.122	51.5552	Ssa12007948,Uncharacterized conserved protein (DUF2358),DUF2358
Ssa02010581	0.049	0.073	0.128	0.0833333	0	1.145	1.534	0.893	10.716	3.42169	3.615	2.13	7.138	4.29433	51.532	Ssa02010581,Methylthioribose kinase-like,APH
Ssa10003129	0	0.029	0	0.00966667	0.018	0.282	0.062	0.120667	12.4828	3.64186	0.544	0.487	0.451	0.494	51.1034	Ssa10003129,Belongs to the major facilitator superfamily. Sugar transporter (TC 2.A.1.1) family,Sugar_tr
Ssa05017062	0	0	0.027	0.009	2.638	13.103	4.464	6.735	748.333	9.54754	0.448	0.357	0.541	0.448667	49.8519	Ssa05017062,Cysteine-rich receptor-like protein kinase,"Pkinase,Pkinase_Tyr,Stress-antifung"
Ssa09024712	0	0.021	0.024	0.015	0.657	0.198	0.584	0.479667	31.9778	4.999	0.904	0.662	0.675	0.747	49.8	Ssa09024712,ribosomal protein import into nucleus,-
Ssa02011669	0	0.431	0.655	0.362	4.501	2.434	3.548	3.49433	9.65285	3.27096	16.918	20.218	16.656	17.9307	49.5322	Ssa02011669,NAC domain-containing protein,NAM
Ssa08021951	0	0.431	0.655	0.362	4.448	2.382	3.517	3.449	9.52762	3.25212	16.918	20.128	16.524	17.8567	49.3278	Ssa08021951,NAC domain-containing protein,NAM
Ssa06018630	3.886	0.918	2.145	2.31633	20.614	13.093	10.42	14.709	6.35012	2.66678	97.682	114.177	111.482	107.78	46.5306	Ssa06018630,Cystinosin homolog,PQ-loop
Ssa10004749	4.779	1.14	2.339	2.75267	25.9	25.082	75.079	42.0203	15.2653	3.93219	126.57	134.838	114.328	125.245	45.4996	Ssa10004749,Protein NRT1 PTR FAMILY,PTR2
Ssa09024381	0.732	0.195	0.379	0.435333	2.728	2.96	9.523	5.07033	11.647	3.54189	24.594	21.934	12.428	19.652	45.1424	Ssa09024381,belongs to the protein kinase superfamily,Pkinase
Ssa06018726	0.873	0.715	0.785	0.791	12.591	19.747	10.41	14.2493	18.0143	4.17107	56.589	33.087	17.358	35.678	45.1049	Ssa06018726,Belongs to the histidine acid phosphatase family,His_Phos_2
Ssa04015318	0.289	0.435	0.254	0.326	2.804	1.567	3.547	2.63933	8.09611	3.01723	15.491	9.473	18.936	14.6333	44.8875	Ssa04015318,-,-
Ssa08023784	0.753	0.627	0.488	0.622667	1.723	5.88	1.186	2.92967	4.70503	2.2342	31.532	32.739	17.805	27.3587	43.9379	Ssa08023784,phosphatase 2c,PP2C
Ssa04014516	0	0	0.694	0.231333	9.843	38.857	28.425	25.7083	111.131	6.79612	0	29.871	0	9.957	43.0418	Ssa04014516,-,-
Ssa05017107	0.131	0.542	0.461	0.378	1.817	1.184	2.064	1.68833	4.46649	2.15914	11.938	15.246	21.173	16.119	42.6429	Ssa05017107,"Zinc-binding domain present in Lin-11, Isl-1, Mec-3.",LIM
Ssa12007453	0.462	1.118	0.813	0.797667	4.304	2.209	3.844	3.45233	4.32804	2.11371	41.051	36.075	24.349	33.825	42.4049	Ssa12007453,Belongs to the GRAS family,GRAS
Ssa11005314	0.298	0.224	0.449	0.323667	6.195	6.077	4.043	5.43833	16.8023	4.07058	12.503	16.611	11.518	13.544	41.8455	Ssa11005314,-,-
Ssa08023073	22.334	18.768	9.451	16.851	130.635	126.181	289.634	182.15	10.8094	3.43422	617.388	672.302	717.576	669.089	39.7062	Ssa08023073,Non-specific serine threonine protein kinase,"NAF,Pkinase"
Ssa12007949	3.255	1.608	1.521	2.128	4.116	2.576	19.562	8.75133	4.11247	2.04	102.364	85.073	64.955	84.1307	39.5351	Ssa12007949,Metal tolerance protein,"Cation_efflux,ZT_dimer"
Ssa13008281	1.401	0.722	0.649	0.924	6.274	9.935	4.057	6.75533	7.31097	2.87006	32.952	33.121	43.24	36.4377	39.4347	Ssa13008281,Protein of unknown function (DUF4079),DUF4079
Ssa11005996	1.819	2.77	4.695	3.09467	30.362	18.391	23.626	24.1263	7.7961	2.96275	123.713	138.561	102.887	121.72	39.3323	Ssa11005996,Belongs to the multi antimicrobial extrusion (MATE) (TC 2.A.66.1) family,MatE
Ssa13009139	0.525	1.944	1.668	1.379	21.775	4.342	13.449	13.1887	9.56394	3.2576	53.475	50.247	57.601	53.7743	38.9952	Ssa13009139,Serine threonine-protein kinase STN8,Pkinase
Ssa02011913	0.159	0.32	0.327	0.268667	5.525	13.495	3.914	7.64467	28.4541	4.83056	6.753	18.585	5.655	10.331	38.4529	Ssa02011913,S-type anion channel,SLAC1
Ssa11006124	3.367	1.864	2.962	2.731	15.523	17.015	8.833	13.7903	5.04955	2.33616	89.381	104.435	121.11	104.975	38.4384	Ssa11006124,Protein of unknown function (DUF3464),DUF3464
Ssa13008526	0.415	0.209	0.731	0.451667	2.69	0.752	2.219	1.887	4.17786	2.06276	6.108	2.38	43.283	17.257	38.2074	Ssa13008526,histidine-containing phosphotransfer protein,Hpt
Ssa09024898	0.824	0.31	0.362	0.498667	3.382	7.545	4.622	5.183	10.3937	3.37764	15.445	17.462	22.891	18.5993	37.2981	Ssa09024898,LOB domain-containing protein,LOB
Ssa08023755	0	0.102	0	0.034	2.511	0.982	0.508	1.33367	39.2255	5.29372	0.499	1.485	1.781	1.255	36.9118	Ssa08023755,"3,4-dihydroxy-2-butanone 4-phosphate synthase","DHBP_synthase,GTP_cyclohydro2"
Ssa08023220	1.613	1.417	3.429	2.153	15.322	55.551	29.903	33.592	15.6024	3.9637	66.096	87.259	82.922	78.759	36.581	Ssa08023220,transcription factor,Myb_DNA-binding
Ssa03013725	0.454	1.745	0.76	0.986333	26.545	5.015	17.358	16.306	16.5319	4.04718	37.383	30.535	38.613	35.5103	36.0024	Ssa03013725,D-glycerate 3-kinase,PRK
Ssa02009792	7.277	10.607	5.404	7.76267	55.206	32.486	126.395	71.3623	9.19302	3.20054	284.402	265.706	284.961	278.356	35.8583	Ssa02009792,"transcription, DNA-templated",Myb_DNA-binding
Ssa03013799	7.376	4.379	3.369	5.04133	54.643	50.416	76.227	60.4287	11.9866	3.58336	257.333	228.12	48.107	177.853	35.279	Ssa03013799,NAC transcription factor,NAM
Ssa03013416	0.166	0.792	0.78	0.579333	22.186	13.477	11.955	15.8727	27.3982	4.77601	20.442	22.202	18.296	20.3133	35.0633	Ssa03013416,At1g28695-like,Nucleotid_trans
Ssa08022075	5.331	5.828	8.895	6.68467	60.198	74.471	113.731	82.8	12.3866	3.6307	243.39	239.799	218.48	233.89	34.989	Ssa08022075,Belongs to the cytochrome P450 family,p450
Ssa02011539	5.371	5.769	8.86	6.66667	59.997	74.399	113.541	82.6457	12.3969	3.6319	242.257	238.41	217.596	232.754	34.9132	Ssa02011539,Belongs to the cytochrome P450 family,p450
Ssa06018501	3.565	4.49	4.403	4.15267	20.416	11.036	37.461	22.971	5.53163	2.4677	152.632	129.66	145.578	142.623	34.345	Ssa06018501,Thioredoxin-like 1-1,Thioredoxin
Ssa04014909	2.484	2.104	1.913	2.167	171.841	60.948	127.656	120.148	55.4445	5.79297	60.381	83.706	72.973	72.3533	33.3887	Ssa04014909,BEST Arabidopsis thaliana protein match is,-
Ssa13008897	0.166	0.834	0.829	0.609667	22.314	13.577	12.044	15.9783	26.2083	4.71195	20.645	22.159	18.168	20.324	33.3362	Ssa13008897,At1g28695-like,Nucleotid_trans
Ssa07020078	0	0.156	0.091	0.0823333	0.479	0.749	0.774	0.667333	8.10526	3.01886	1.598	2.022	4.553	2.72433	33.0891	Ssa07020078,xanthine catabolic process,"Ald_Xan_dh_C,Ald_Xan_dh_C2,CO_deh_flav_C,FAD_binding_5,Fer2,Fer2_2"
Ssa08023321	9.895	6.153	5.829	7.29233	44.78	50.218	50.686	48.5613	6.65923	2.73536	196.062	200.408	321.552	239.341	32.8209	Ssa08023321,Geranylgeranyl diphosphate reductase,"FAD_binding_3,GIDA,Pyr_redox_2"
Ssa05017171	2.411	1.238	0.964	1.53767	3.193	10.111	13.233	8.84567	5.75266	2.52423	48.503	42.474	59.546	50.1743	32.6302	Ssa05017171,Thioredoxin M3,Thioredoxin
Ssa06018174	0.183	0.413	0.161	0.252333	2.285	0.993	0.782	1.35333	5.36328	2.42311	5.65	6.863	12.145	8.21933	32.5733	Ssa06018174,-,-
Ssa13008594	0.409	1.814	0.92	1.04767	19.525	4.973	17.334	13.944	13.3096	3.73439	37.383	30.642	34.018	34.0143	32.4668	Ssa13008594,D-glycerate 3-kinase,PRK
Ssa07021458	1.611	1.747	2.495	1.951	14.069	21.102	3.891	13.0207	6.67384	2.73852	63.157	67.477	55.359	61.9977	31.7774	Ssa07021458,Monoacylglycerol lipase,"Abhydrolase_1,Abhydrolase_4"
Ssa10003502	0	0	0.021	0.007	0.311	0.043	0.09	0.148	21.1429	4.4021	0.088	0.056	0.5	0.214667	30.6667	Ssa10003502,receptor-like protein kinase,"Malectin_like,Pkinase_Tyr"
Ssa02009646	2.455	0.804	0.892	1.38367	13.404	8.545	10.721	10.89	7.87039	2.97644	48.339	46.205	32.746	42.43	30.6649	Ssa02009646,transcription factor,TCP
Ssa09024674	1.254	1.369	1.048	1.22367	12.508	8.078	9.426	10.004	8.17543	3.03129	43.288	37.144	31.585	37.339	30.514	Ssa09024674,Cysteine-rich receptor-like protein kinase,"Pkinase,Pkinase_Tyr,Stress-antifung"
Ssa05017178	1.321	0.545	0.675	0.847	9.104	10.791	27.93	15.9417	18.8213	4.2343	26.312	21.873	29.167	25.784	30.4416	Ssa05017178,Belongs to the UDP-glycosyltransferase family,UDPGT
Ssa03013066	0.582	0.243	1.82	0.881667	4.396	5.263	7.668	5.77567	6.55085	2.71168	26.901	26.217	26.644	26.5873	30.1558	Ssa03013066,Bulb-type mannose-specific lectin,"B_lectin,DUF3403,PAN_2,Pkinase,Pkinase_Tyr"
Ssa05016382	0	0.281	0	0.0936667	145.631	144.928	91.574	127.378	1359.9	10.4093	4.109	2.62	1.725	2.818	30.0854	Ssa05016382,-,-
Ssa06018822	1.277	0.962	0.674	0.971	10.129	7.392	4.98	7.50033	7.72434	2.94941	35.672	28.634	23.306	29.204	30.0762	Ssa06018822,TCP family transcription factor,TCP
Ssa06018944	11.372	6.87	7.795	8.679	82.742	183.101	120.086	128.643	14.8223	3.8897	281.213	280.595	218.477	260.095	29.9683	Ssa06018944,Senescence regulator,Senescence_reg
Ssa11006386	0.11	0.083	0.241	0.144667	18.78	41.783	6.587	22.3833	154.724	7.27355	5.277	4.624	3.087	4.32933	29.9263	Ssa11006386,Belongs to the iron ascorbate-dependent oxidoreductase family,"2OG-FeII_Oxy,DIOX_N"
Ssa02009988	4.412	4.894	8.891	6.06567	54.965	62.048	113.875	76.9627	12.6882	3.66542	216.654	196.46	123.423	178.846	29.4849	Ssa02009988,F-box kelch-repeat protein,"F-box,FBA_1,FBA_3"
Ssa02010419	1.195	0.675	0.894	0.921333	1.271	7.134	4.15	4.185	4.54233	2.18343	25.389	32.307	23.241	26.979	29.2826	Ssa02010419,-,-
Ssa06017783	3.639	4.423	3.595	3.88567	36.439	29.972	32.881	33.0973	8.5178	3.09048	106.687	100.27	132.152	113.036	29.0906	Ssa06017783,KIP1-like protein,KIP1
Ssa01001485	0.122	0.87	0.535	0.509	5.4	3.41	35.739	14.8497	29.1742	4.86662	15.022	13.828	14.878	14.576	28.6365	Ssa01001485,Heat Stress Transcription Factor,HSF_DNA-bind
Ssa02009866	38.192	20.324	22.959	27.1583	73.449	166.025	152.509	130.661	4.81108	2.26636	725.013	943.211	664.135	777.453	28.6267	Ssa02009866,-,-
Ssa12007099	0.442	0.665	0.809	0.638667	2.178	3.295	2.988	2.82033	4.41597	2.14273	22.668	22.051	10.081	18.2667	28.6013	Ssa12007099,Protein of unknown function (DUF688),DUF688
Ssa13009092	1.812	1.176	1.374	1.454	4.942	7.234	9.881	7.35233	5.05663	2.33817	39.78	45.013	39.446	41.413	28.4821	Ssa13009092,LON peptidase N-terminal domain and RING finger protein,zf-C3HC4_3
Ssa02011895	1.031	0.517	0.806	0.784667	110.252	169.839	86.43	122.174	155.701	7.28264	23.147	23.349	19.263	21.9197	27.935	Ssa02011895,-,-
Ssa09024409	0.289	0	0.254	0.181	2.537	1.828	4.164	2.843	15.7072	3.97335	3.82	4.962	6.238	5.00667	27.6611	Ssa09024409,-,-
Ssa01001974	6.559	7.589	4.837	6.32833	38.05	33.193	79.786	50.343	7.95518	2.99189	197.108	160.887	164.942	174.312	27.5447	Ssa01001974,"transcription, DNA-templated",Myb_DNA-binding
Ssa08023107	3.991	3.33	5.694	4.33833	65.804	98.735	37.745	67.428	15.5424	3.95813	93.255	123.892	139.854	119	27.43	Ssa08023107,E3 ubiquitin-protein ligase,zf-RING_2
Ssa02010794	0.185	1.854	1.727	1.25533	8.177	6.832	8.536	7.84833	6.25199	2.64432	46.806	25.575	30.634	34.3383	27.354	Ssa02010794,Pentatricopeptide repeat-containing protein,"PPR,PPR_2,PPR_3"
Ssa10003275	0.049	0	0	0.0163333	0.136	0.31	0.105	0.183667	11.2449	3.4912	0.18	0.192	0.946	0.439333	26.898	Ssa10003275,Encoded by,Mem_trans
Ssa11006062	25.597	29.958	21.378	25.6443	196.441	64.839	350.27	203.85	7.94912	2.9908	763.902	759.582	543.427	688.97	26.8664	Ssa11006062,PLATZ transcription factor family protein,PLATZ
Ssa05016800	0.08	0.41	0.035	0.175	0.086	11.122	8.029	6.41233	36.6419	5.19542	3.686	3.12	6.941	4.58233	26.1848	Ssa05016800,Toll - interleukin 1 - resistance,"NB-ARC,RNase_H,RVT_1,RVT_3,TIR,zf-RVT"
Ssa08023461	5.274	7.431	4.288	5.66433	62.177	46.217	37.671	48.6883	8.5956	3.1036	158.127	175.335	110.625	148.029	26.1335	Ssa08023461,Cytochrome p450,p450
Ssa13008601	4.555	5.759	7.183	5.83233	103.632	120.24	114.104	112.659	19.3162	4.27174	179.821	186.621	83.66	150.034	25.7245	Ssa13008601,Molybdate transporter,MFS_MOT1
Ssa03013718	4.555	5.759	7.258	5.85733	104.05	119.851	114.471	112.791	19.2563	4.26726	179.569	186.621	83.726	149.972	25.6041	Ssa03013718,Molybdate transporter,MFS_MOT1
Ssa01002637	14.202	5.104	5.254	8.18667	18.062	43.205	90.351	50.5393	6.17337	2.62606	196.579	242.722	186.689	208.663	25.4882	Ssa01002637,-,-
Ssa07021229	20.394	13.897	20.903	18.398	30.795	93.332	134.548	86.225	4.68665	2.22856	487.606	577.754	327.904	464.421	25.243	Ssa07021229,-,-
Ssa09024942	0	0.93	0.217	0.382333	7.081	0	7.387	4.82267	12.6138	3.65693	12.344	11.383	5.145	9.624	25.1718	Ssa09024942,-,-
Ssa08023568	0.584	0.486	1.352	0.807333	1.705	10.505	2.019	4.743	5.8749	2.55456	26.994	21.487	12.473	20.318	25.1668	Ssa08023568,DUF4210,"Chromosome_seg,DUF4210"
Ssa13008348	22.692	14.661	11.721	16.358	138.866	91.098	283.815	171.26	10.4695	3.38812	394.532	458.438	369.436	407.469	24.9094	Ssa13008348,-,-
Ssa07020294	0.086	0.207	0.349	0.214	1.498	2.321	1.96	1.92633	9.00156	3.17017	6.508	4.656	4.572	5.24533	24.5109	Ssa07020294,Ribonuclease H protein,"C2,DUF4283,RVT_1,RVT_3,zf-RVT"
Ssa03013928	0.115	0.043	0.051	0.0696667	0	1.041	0	0.347	4.98086	2.3164	1.016	1.619	2.444	1.693	24.3014	Ssa03013928,strictosidine,Str_synth
Ssa01001699	0.129	0.226	0.528	0.294333	2.816	1.163	1.741	1.90667	6.47792	2.69553	6.052	6.064	8.868	6.99467	23.7644	Ssa01001699,IQ-domain,"DUF4005,IQ"
Ssa07021072	134.303	118.495	113.195	121.998	438.947	575.106	1103.19	705.749	5.78494	2.5323	3588.53	4635.98	230.433	2818.32	23.1014	Ssa07021072,Vacuolar-processing enzyme-like,Peptidase_C13
Ssa06018758	0.235	0.531	0.538	0.434667	1.674	2.126	2.461	2.087	4.80138	2.26345	9.123	9.035	11.899	10.019	23.0498	Ssa06018758,amino acid transporter,Aa_trans
Ssa10003124	1.585	1.364	1.893	1.614	5.499	13.724	14.488	11.237	6.96221	2.79954	39.623	41.316	29.755	36.898	22.8612	Ssa10003124,membrane-associated kinase regulator,-
Ssa11005123	0.033	0	0.087	0.04	0.122	0.536	0.475	0.377667	9.44167	3.23904	0.726	0.797	1.219	0.914	22.85	Ssa11005123,receptor-like protein kinase,"GUB_WAK_bind,Pkinase,Pkinase_Tyr"
Ssa13008180	11.963	8.887	7.157	9.33567	46.546	27.193	78.262	50.667	5.42725	2.44022	218.965	215.837	200.203	211.668	22.6731	Ssa13008180,Uncharacterized conserved protein (DUF2358),DUF2358
Ssa10003067	0.06	0.269	0.157	0.162	1.102	0.323	1.687	1.03733	6.40329	2.67881	3.11	3.398	4.506	3.67133	22.6626	Ssa10003067,S-adenosylmethionine decarboxylase proenzyme,SAM_decarbox
Ssa05016532	0	0.195	0	0.065	0.6	1.877	0.277	0.918	14.1231	3.81998	0.381	2.23	1.802	1.471	22.6308	Ssa05016532,-,-
Ssa02010626	4.377	5.258	5.104	4.913	87.479	137.584	153.825	126.296	25.7065	4.68406	113.179	113.912	93.159	106.75	21.7281	Ssa02010626,Ferredoxin-nitrite reductase,"NIR_SIR,NIR_SIR_ferr"
Ssa02009853	0.387	0.146	0.17	0.234333	2.146	2.798	1.136	2.02667	8.64865	3.11247	6.396	5.136	3.581	5.03767	21.4979	Ssa02009853,-,-
Ssa09024544	6.489	5.506	8.563	6.85267	173.788	106.939	280.686	187.138	27.3087	4.77129	114.893	131.567	178.516	141.659	20.672	Ssa09024544,serine acetyltransferase,"Hexapep,SATase_N"
Ssa12006676	9.156	3.289	7.169	6.538	22.493	53.105	18.622	31.4067	4.80371	2.26415	131.957	149.501	121.803	134.42	20.5599	Ssa12006676,pyridoxal biosynthesis protein,SNO
Ssa09024627	3.14	5.713	3.913	4.25533	7.946	11.122	47.943	22.337	5.24918	2.39209	85.848	85.927	89.786	87.187	20.4889	Ssa09024627,Protein of unknown function (DUF2488),Ycf54
Ssa02011851	32.397	13.441	25.4	23.746	107.632	55.811	394.872	186.105	7.83732	2.97036	539.809	489.525	422.463	483.932	20.3795	Ssa02011851,Wound-induced protein,DUF3774
Ssa06019306	3.639	3.619	7.518	4.92533	64.099	89.879	85.506	79.828	16.2076	4.0186	101.639	103.982	88.796	98.139	19.9254	Ssa06019306,Belongs to the UDP-glycosyltransferase family,UDPGT
Ssa06019506	0.205	0.464	0.633	0.434	3.088	2.555	0.851	2.16467	4.98771	2.31838	10.082	9.752	5.669	8.501	19.5876	Ssa06019506,NAC domain-containing protein,NAM
Ssa04014762	53.816	35.487	30.375	39.8927	104.572	266.957	505.002	292.177	7.32408	2.87265	664.546	883.558	788.305	778.803	19.5225	Ssa04014762,"Catalyzes the formation of formate and 2-keto-4- methylthiobutyrate (KMTB) from 1,2-dihydroxy-3-keto-5- methylthiopentene (DHK-MTPene)",ARD
Ssa12007079	0.442	1.166	0.714	0.774	8.251	7.402	2.402	6.01833	7.77562	2.95896	14.416	12.845	17.637	14.966	19.3359	Ssa12007079,transcription factor,TCP
Ssa06018075	0.506	0.286	0.334	0.375333	1.463	0.458	2.771	1.564	4.16696	2.059	8.463	5.634	7.518	7.205	19.1963	Ssa06018075,-,-
Ssa01000763	0	0	0.157	0.0523333	0.824	0.322	0.762	0.636	12.1529	3.60322	0.917	1.114	0.963	0.998	19.0701	Ssa01000763,Belongs to the multi antimicrobial extrusion (MATE) (TC 2.A.66.1) family,MatE
Ssa01002714	0.522	0.838	0.629	0.663	17.4	13.751	10.163	13.7713	20.7712	4.37652	16.37	12.791	8.635	12.5987	19.0025	Ssa01002714,Belongs to the ABC transporter superfamily. ABCG family. PDR (TC 3.A.1.205) subfamily,"ABC2_membrane,ABC_tran,ABC_trans_N,PDR_assoc"
Ssa09023937	0.068	0.461	1.018	0.515667	22.579	33.811	11.276	22.5553	43.7401	5.45089	8.71	9.629	10.825	9.72133	18.852	Ssa09023937,Non-specific lipid transfer protein GPI-anchored,LTP_2
Ssa06018816	0.264	0	0.465	0.243	2.202	2.87	2.896	2.656	10.93	3.45023	2.041	1.653	10	4.56467	18.7846	Ssa06018816,Protein CHLORORESPIRATORY REDUCTION 7,CRR7
Ssa12007025	83.669	49.892	62.002	65.1877	274.889	405.535	231.43	303.951	4.66271	2.22117	1109.78	1425.62	1048.24	1194.55	18.3248	Ssa12007025,-,-
Ssa02011952	2.662	6.414	6.323	5.133	27.206	48.871	13.366	29.8143	5.80836	2.53813	101.945	85.266	94.696	93.969	18.3068	Ssa02011952,40S ribosomal protein,Ribosomal_S25
Ssa03013170	0.777	0.877	0.494	0.716	49.969	25.172	28.053	34.398	48.0419	5.58622	14.337	16.991	7.625	12.9843	18.1345	Ssa03013170,Belongs to the UDP-glycosyltransferase family,UDPGT
Ssa06019415	3.565	2.44	1.711	2.572	14.537	8.206	14.281	12.3413	4.79834	2.26254	43.116	45.825	50.639	46.5267	18.0897	Ssa06019415,plastid-lipid-associated protein 4,PAP_fibrillin
Ssa10003103	126.889	119.364	180.099	142.117	835.443	988.861	1106.58	976.961	6.87433	2.78122	2942.13	3005.39	1719.51	2555.68	17.9829	Ssa10003103,Stem-specific protein,DUF3700
Ssa09025049	2.371	1.849	3.577	2.599	9.244	13.022	15.971	12.7457	4.90407	2.29398	23.721	26.667	88.104	46.164	17.7622	Ssa09025049,Rhodanese-like domain-containing protein 14,Rhodanese
Ssa13008157	7.351	10.226	4.823	7.46667	34.026	8.621	111.021	51.2227	6.86018	2.77825	146.454	136.77	114.564	132.596	17.7584	Ssa13008157,reveille,Myb_DNA-binding
Ssa10004750	11.588	17.842	11.945	13.7917	83.111	75.088	105.841	88.0133	6.38163	2.67393	222.949	243.848	266.284	244.36	17.718	Ssa10004750,HPP family,HPP
Ssa09025002	1.358	4.114	1.726	2.39933	14.854	6.143	17.835	12.944	5.39483	2.43158	52.523	43.889	31.005	42.4723	17.7017	Ssa09025002,Lectin-domain containing receptor kinase,"Lectin_legB,Pkinase_Tyr"
Ssa13008452	0.598	2.056	1.547	1.40033	17.92	23.578	5.754	15.7507	11.2478	3.49157	34.367	24.049	15.817	24.7443	17.6703	Ssa13008452,ZINC FINGER protein,"zf-C2H2,zf-C2H2_jaz"
Ssa05016182	0	0.014	0	0.00466667	0.017	0.05	0	0.0223333	4.78571	2.25873	0.231	0	0.014	0.0816667	17.5	Ssa05016182,Pentatricopeptide repeat-containing protein,"PPR,PPR_1,PPR_2,PPR_3"
Ssa03014123	3.246	2.165	3.182	2.86433	9.071	11.659	16.993	12.5743	4.38997	2.13421	39.303	43.077	67.884	50.088	17.4868	Ssa03014123,Belongs to the peptidase S10 family,Peptidase_S10
Ssa04015307	9.682	3.624	14.047	9.11767	35.664	251.073	82.632	123.123	13.5038	3.75529	154.496	152.392	165.553	157.48	17.272	Ssa04015307,F-box kelch-repeat protein,"F-box,Kelch_1,Kelch_6"
Ssa06018056	0	0.211	0	0.0703333	0.779	2.285	2.1	1.72133	24.4739	4.61317	1.445	0.877	1.3	1.20733	17.1659	Ssa06018056,Protein of unknown function (DUF4050),DUF4050
[truncated: 1,341 more rows]

## Sheet: N fixation core
id	Root R1	Root R2	Root R3	Root average	Root nodule R1	Root nodule R2	Root nodule R3	Root nodule average	Root nodule/Root	Log2(Root nodule/Root）	Leaflet T2 R1	Leaflet T2 R2	Leaflet T2 R3	Leaflet T2 Average	Leaflet/Root	description
[truncated: 699 more rows]

[truncated: 6 more sheets: GO enriched genes in core, Homoglobin, Amino tran & metabolism, Cytokinin metabolism, Auxin signaling, Transcription factors]
